# Supplementary material for: Longitudinal profiling of the lung microbiome in the AERIS study demonstrates repeatability of bacterial and eosinophilic COPD exacerbations
Source: PubMed Central journal article supplement — Thorax. 2018 Jan 31;73(5):422–30. doi: 10.1136/thoraxjnl-2017-210408 (PMC5909767; doi:10.1136/thoraxjnl-2017-210408), 2018-01-31
Supplement: thoraxjnl-2017-210408supp002.pdf [file thoraxjnl-2017-210408supp002.pdf]

**Supplementary Table S2: Genus-level Relative Abundances for all Samples**

| <b>16SrRNAsequencingSampleID</b>      | <b>SubjectID</b> | <b>VisitType</b> | <b>Sputum_Spontaneous</b> |
|---------------------------------------|------------------|------------------|---------------------------|
| AERIS.pl6.B3.1.25626056308007.EXA2    | 1                | Exacerbation     | No                        |
| AERIS.pl5.B3.1.25626160051004.POSM1   | 1                | Stable           | No                        |
| AERIS.pl2.A5.1.25626058722009.POSM3   | 1                | Stable           | Yes                       |
| AERIS.pl2.D9.1.25626067722007.POSM4   | 1                | Stable           | No                        |
| AERIS.pl3.A1.1.25626068727001.POSM5   | 1                | Stable           | Yes                       |
| AERIS.pl3.A5.1.25626069727000.POSM6   | 1                | Stable           | No                        |
| AERIS.pl3.G9.1.25626071527001.POSM7   | 1                | Stable           | No                        |
| AERIS.pl4.D2.1.25626075390007.POSM8   | 1                | Stable           | No                        |
| AERIS.pl4.F6.1.25626076402006.POSM9   | 1                | Stable           | No                        |
| AERIS.pl1.A1.1.25626077402005.POSM10  | 1                | Stable           | No                        |
| AERIS.pl1.D4.1.25626078402004.POSM11  | 1                | Stable           | No                        |
| AERIS.pl6.C3.2.25626056318006.EXA2    | 2                | Exacerbation     | Yes                       |
| AERIS.pl6.F6.2.25626056343008.EXA3    | 2                | Exacerbation     | No                        |
| AERIS.pl5Bis.D7.4.25626056276009.EXA1 | 4                | Exacerbation     | Yes                       |
| AERIS.pl6.D3.4.25626056321006.EXA2    | 4                | Exacerbation     | No                        |
| AERIS.pl3.B5.4.25626069728007.POSM6   | 4                | Stable           | No                        |
| AERIS.pl3.H9.4.25626071528008.POSM7   | 4                | Stable           | Yes                       |
| AERIS.pl4.G6.4.25626076403003.POSM9   | 4                | Stable           | Yes                       |
| AERIS.pl1.E4.4.25626078403001.POSM11  | 4                | Stable           | Yes                       |
| AERIS.pl1.E8.4.25626075905003.POSM12  | 4                | Stable           | Yes                       |
| AERIS.pl5.C3.5.25626160055002.POSM1   | 5                | Stable           | No                        |
| AERIS.pl6.F3.5.25626056324007.EXA2    | 5                | Exacerbation     | No                        |
| AERIS.pl6.G6.5.25626056353007.EXA3    | 5                | Exacerbation     | No                        |
| AERIS.pl7.D4.5.25626056411004.EXA9    | 5                | Exacerbation     | Yes                       |
| AERIS.pl3.C5.5.25626069729004.POSM6   | 5                | Stable           | No                        |
| AERIS.pl7.E2.5.25626056402002.EXA6    | 5                | Exacerbation     | Yes                       |
| AERIS.pl1.F8.5.25626075906000.POSM12  | 5                | Stable           | No                        |
| AERIS.pl4.C10.6.25626152706004.PREM0  | 6                | Stable           | Yes                       |
| AERIS.pl5Bis.E7.6.25626056290005.EXA1 | 6                | Exacerbation     | Yes                       |
| AERIS.pl3.B1.6.25626068728008.POSM5   | 6                | Stable           | Yes                       |
| AERIS.pl3.D5.6.25626069730000.POSM6   | 6                | Stable           | Yes                       |
| AERIS.pl1.B1.6.25626077403002.POSM10  | 6                | Stable           | Yes                       |
| AERIS.pl1.G8.6.25626075907007.POSM12  | 6                | Stable           | Yes                       |
| AERIS.pl4.D10.8.25626152708008.PREM0  | 8                | Stable           | No                        |
| AERIS.pl3.A10.8.25626071529005.POSM7  | 8                | Stable           | No                        |
| AERIS.pl1.H8.8.25626075908004.POSM12  | 8                | Stable           | No                        |
| AERIS.pl1.F12.9.25626065706009.POSM2  | 9                | Stable           | No                        |
| AERIS.pl2.B5.9.25626058723006.POSM3   | 9                | Stable           | No                        |
| AERIS.pl3.E5.9.25626069731007.POSM6   | 9                | Stable           | No                        |
| AERIS.pl3.B10.9.25626071530001.POSM7  | 9                | Stable           | No                        |
| AERIS.pl4.E2.9.25626075391004.POSM8   | 9                | Stable           | No                        |
| AERIS.pl4.H6.9.25626076404000.POSM9   | 9                | Stable           | No                        |
| AERIS.pl1.F4.9.25626078404008.POSM11  | 9                | Stable           | No                        |
| AERIS.pl2.C5.10.25626058724003.POSM3  | 10               | Stable           | Yes                       |

|                                        |                 |     |
|----------------------------------------|-----------------|-----|
| AERIS.pl4.E10.11.25626158561003.PREM0  | 11 Stable       | Yes |
| AERIS.pl5Bis.F7.11.25626056249003.EXA1 | 11 Exacerbation | Yes |
| AERIS.pl2.E9.11.25626067723004.POSM4   | 11 Stable       | Yes |
| AERIS.pl6.H12.11.25626056383004.EXA5   | 11 Exacerbation | No  |
| AERIS.pl3.F5.11.25626069732004.POSM6   | 11 Stable       | No  |
| AERIS.pl3.C10.11.25626071531008.POSM7  | 11 Stable       | No  |
| AERIS.pl4.F2.11.25626075392001.POSM8   | 11 Stable       | No  |
| AERIS.pl1.C1.11.25626077404009.POSM10  | 11 Stable       | No  |
| AERIS.pl7.F2.11.25626056396004.EXA6    | 11 Exacerbation | No  |
| AERIS.pl4.F10.15.25626158565001.PREM0  | 15 Stable       | Yes |
| AERIS.pl5Bis.G7.15.25626056268004.EXA1 | 15 Exacerbation | Yes |
| AERIS.pl3.G5.15.25626069733001.POSM6   | 15 Stable       | No  |
| AERIS.pl4.A7.15.25626076405007.POSM9   | 15 Stable       | No  |
| AERIS.pl1.D1.15.25626077405006.POSM10  | 15 Stable       | No  |
| AERIS.pl7.G3.17.25626056406000.EXA7    | 17 Exacerbation | Yes |
| AERIS.pl2.F9.17.25626067724001.POSM4   | 17 Stable       | Yes |
| AERIS.pl7.G2.17.25626056398008.EXA6    | 17 Exacerbation | No  |
| AERIS.pl3.C1.17.25626068729005.POSM5   | 17 Stable       | No  |
| AERIS.pl3.H5.17.25626069734008.POSM6   | 17 Stable       | No  |
| AERIS.pl1.A9.17.25626075909001.POSM12  | 17 Stable       | Yes |
| AERIS.pl1.G12.20.25626065707006.POSM2  | 20 Stable       | No  |
| AERIS.pl3.D1.20.25626068730001.POSM5   | 20 Stable       | No  |
| AERIS.pl3.A6.20.25626069735005.POSM6   | 20 Stable       | No  |
| AERIS.pl3.D10.20.25626071532005.POSM7  | 20 Stable       | Yes |
| AERIS.pl5Bis.A8.21.25626056271004.EXA1 | 21 Exacerbation | No  |
| AERIS.pl7.A1.21.25626056385008.EXA5    | 21 Exacerbation | Yes |
| AERIS.pl3.E1.21.25626068731008.POSM5   | 21 Stable       | Yes |
| AERIS.pl7.H2.21.25626056399005.EXA6    | 21 Exacerbation | Yes |
| AERIS.pl6.E10.21.25626056367004.EXA4   | 21 Exacerbation | No  |
| AERIS.pl3.E10.21.25626071533002.POSM7  | 21 Stable       | Yes |
| AERIS.pl2.D5.22.25626058725000.POSM3   | 22 Stable       | No  |
| AERIS.pl6.F10.22.25626056368001.EXA4   | 22 Exacerbation | Yes |
| AERIS.pl6.A7.22.25626056344005.EXA3    | 22 Exacerbation | No  |
| AERIS.pl3.B6.22.25626069736002.POSM6   | 22 Stable       | No  |
| AERIS.pl4.G2.22.25626075393008.POSM8   | 22 Stable       | No  |
| AERIS.pl1.G4.22.25626078405005.POSM11  | 22 Stable       | No  |
| AERIS.pl4.G10.24.25626158574003.PREM0  | 24 Stable       | Yes |
| AERIS.pl6.G3.24.25626056319003.EXA2    | 24 Exacerbation | Yes |
| AERIS.pl2.E5.24.25626058726007.POSM3   | 24 Stable       | Yes |
| AERIS.pl2.G9.24.25626067725008.POSM4   | 24 Stable       | No  |
| AERIS.pl6.B7.25.25626056345002.EXA3    | 25 Exacerbation | Yes |
| AERIS.pl6.G10.25.25626056369008.EXA4   | 25 Exacerbation | Yes |
| AERIS.pl1.E1.25.25626077406003.POSM10  | 25 Stable       | Yes |
| AERIS.pl6.C7.26.25626056346009.EXA3    | 26 Exacerbation | Yes |
| AERIS.pl3.F1.26.25626068732005.POSM5   | 26 Stable       | No  |
| AERIS.pl4.B7.26.25626076406004.POSM9   | 26 Stable       | Yes |
| AERIS.pl1.H12.27.25626065708003.POSM2  | 27 Stable       | No  |

|                                        |                 |     |
|----------------------------------------|-----------------|-----|
| AERIS.pl2.F5.27.25626058727004.POSM3   | 27 Stable       | Yes |
| AERIS.pl3.G1.27.25626068733002.POSM5   | 27 Stable       | No  |
| AERIS.pl3.C6.27.25626069737009.POSM6   | 27 Stable       | No  |
| AERIS.pl4.H2.27.25626075394005.POSM8   | 27 Stable       | No  |
| AERIS.pl1.H4.27.25626078406002.POSM11  | 27 Stable       | No  |
| AERIS.pl2.G5.29.25626058728001.POSM3   | 29 Stable       | Yes |
| AERIS.pl2.H9.29.25626067726005.POSM4   | 29 Stable       | No  |
| AERIS.pl3.H1.29.25626068734009.POSM5   | 29 Stable       | Yes |
| AERIS.pl3.D6.29.25626069738006.POSM6   | 29 Stable       | No  |
| AERIS.pl4.C7.29.25626076407001.POSM9   | 29 Stable       | No  |
| AERIS.pl1.A5.29.25626078407009.POSM11  | 29 Stable       | No  |
| AERIS.pl1.B9.29.25626079910003.POSM12  | 29 Stable       | No  |
| AERIS.pl5Bis.B8.29.25626056272001.EXA1 | 29 Exacerbation | No  |
| AERIS.pl4.H10.30.25626158580004.PREM0  | 30 Stable       | No  |
| AERIS.pl6.A11.30.25626056371001.EXA4   | 30 Exacerbation | No  |
| AERIS.pl6.D7.30.25626056347006.EXA3    | 30 Exacerbation | No  |
| AERIS.pl3.F10.30.25626071534009.POSM7  | 30 Stable       | No  |
| AERIS.pl7.B1.30.25626056386005.EXA5    | 30 Exacerbation | No  |
| AERIS.pl7.A3.30.25626056400008.EXA6    | 30 Exacerbation | Yes |
| AERIS.pl1.B5.30.25626078408006.POSM11  | 30 Stable       | Yes |
| AERIS.pl1.C9.30.25626079911000.POSM12  | 30 Stable       | No  |
| AERIS.pl4.A11.32.25626158582008.PREM0  | 32 Stable       | No  |
| AERIS.pl2.A1.32.25626065709000.POSM2   | 32 Stable       | No  |
| AERIS.pl2.H5.32.25626058729008.POSM3   | 32 Stable       | Yes |
| AERIS.pl2.A10.32.25626067727002.POSM4  | 32 Stable       | No  |
| AERIS.pl3.A2.32.25626068735006.POSM5   | 32 Stable       | No  |
| AERIS.pl3.F6.32.25626069739003.POSM6   | 32 Stable       | No  |
| AERIS.pl3.G10.32.25626071535006.POSM7  | 32 Stable       | No  |
| AERIS.pl4.A3.32.25626075395002.POSM8   | 32 Stable       | Yes |
| AERIS.pl5Bis.C8.32.25626056273008.EXA1 | 32 Exacerbation | Yes |
| AERIS.pl1.C5.32.25626078409003.POSM11  | 32 Stable       | Yes |
| AERIS.pl1.D9.32.25626079912007.POSM12  | 32 Stable       | No  |
| AERIS.pl5.D3.33.25626160083005.POSM1   | 33 Stable       | No  |
| AERIS.pl6.E7.33.25626056348003.EXA3    | 33 Exacerbation | No  |
| AERIS.pl2.B1.33.25626065710006.POSM2   | 33 Stable       | No  |
| AERIS.pl7.C1.33.25626056387002.EXA5    | 33 Exacerbation | Yes |
| AERIS.pl6.B11.33.25626056372008.EXA4   | 33 Exacerbation | Yes |
| AERIS.pl4.B3.33.25626075396009.POSM8   | 33 Stable       | No  |
| AERIS.pl1.D5.33.25626078410009.POSM11  | 33 Stable       | No  |
| AERIS.pl7.B3.33.25626056401005.EXA6    | 33 Exacerbation | No  |
| AERIS.pl2.C1.34.25626065711003.POSM2   | 34 Stable       | Yes |
| AERIS.pl5Bis.D8.34.25626056274005.EXA1 | 34 Exacerbation | No  |
| AERIS.pl3.G6.34.25626069740009.POSM6   | 34 Stable       | No  |
| AERIS.pl2.D1.35.25626065712000.POSM2   | 35 Stable       | No  |
| AERIS.pl2.A6.35.25626066210000.POSM3   | 35 Stable       | No  |
| AERIS.pl2.B10.35.25626067728009.POSM4  | 35 Stable       | No  |
| AERIS.pl3.H6.35.25626069741006.POSM6   | 35 Stable       | No  |

|                                        |                 |     |
|----------------------------------------|-----------------|-----|
| AERIS.pl3.H10.35.25626071536003.POSM7  | 35 Stable       | No  |
| AERIS.pl2.B6.36.25626066211007.POSM3   | 36 Stable       | No  |
| AERIS.pl2.C10.36.25626067729006.POSM4  | 36 Stable       | No  |
| AERIS.pl3.B2.36.25626068736003.POSM5   | 36 Stable       | No  |
| AERIS.pl7.D1.36.25626056388009.EXA5    | 36 Exacerbation | No  |
| AERIS.pl5.E3.38.25626160088000.POSM1   | 38 Stable       | Yes |
| AERIS.pl2.E1.38.25626065713007.POSM2   | 38 Stable       | Yes |
| AERIS.pl5Bis.E8.38.25626056275002.EXA1 | 38 Exacerbation | Yes |
| AERIS.pl2.C6.38.25626066212004.POSM3   | 38 Stable       | Yes |
| AERIS.pl2.D10.38.25626067730002.POSM4  | 38 Stable       | Yes |
| AERIS.pl3.A11.38.25626071537000.POSM7  | 38 Stable       | Yes |
| AERIS.pl6.C11.39.25626056373005.EXA4   | 39 Exacerbation | No  |
| AERIS.pl7.E1.39.25626056389006.EXA5    | 39 Exacerbation | No  |
| AERIS.pl6.H3.39.25626056320009.EXA2    | 39 Exacerbation | No  |
| AERIS.pl6.F7.39.25626056349000.EXA3    | 39 Exacerbation | No  |
| AERIS.pl7.C4.39.25626056410007.EXA8    | 39 Exacerbation | No  |
| AERIS.pl3.A7.39.25626069742003.POSM6   | 39 Stable       | No  |
| AERIS.pl7.H3.39.25626056407007.EXA7    | 39 Exacerbation | Yes |
| AERIS.pl4.C3.39.25626075397006.POSM8   | 39 Stable       | No  |
| AERIS.pl4.D7.39.25626076408008.POSM9   | 39 Stable       | No  |
| AERIS.pl1.F1.39.25626077407000.POSM10  | 39 Stable       | No  |
| AERIS.pl1.E9.39.25626079913004.POSM12  | 39 Stable       | No  |
| AERIS.pl5.F3.41.25626160091000.POSM1   | 41 Stable       | No  |
| AERIS.pl2.F1.42.25626065714004.POSM2   | 42 Stable       | No  |
| AERIS.pl5Bis.F8.42.25626056277006.EXA1 | 42 Exacerbation | Yes |
| AERIS.pl4.B11.44.25626158594001.PREM0  | 44 Stable       | Yes |
| AERIS.pl6.A4.44.25626056322003.EXA2    | 44 Exacerbation | Yes |
| AERIS.pl5.G3.44.25626160094001.POSM1   | 44 Stable       | Yes |
| AERIS.pl5Bis.G8.44.25626056278003.EXA1 | 44 Exacerbation | No  |
| AERIS.pl2.D6.44.25626066213001.POSM3   | 44 Stable       | No  |
| AERIS.pl2.E10.44.25626067731009.POSM4  | 44 Stable       | No  |
| AERIS.pl3.C2.44.25626068737000.POSM5   | 44 Stable       | No  |
| AERIS.pl6.G7.44.25626056350006.EXA3    | 44 Exacerbation | Yes |
| AERIS.pl3.B7.44.25626069743000.POSM6   | 44 Stable       | No  |
| AERIS.pl3.B11.44.25626071538007.POSM7  | 44 Stable       | No  |
| AERIS.pl4.D3.44.25626075398003.POSM8   | 44 Stable       | No  |
| AERIS.pl1.E5.44.25626078411006.POSM11  | 44 Stable       | No  |
| AERIS.pl1.F9.44.25626079914001.POSM12  | 44 Stable       | No  |
| AERIS.pl6.H7.45.25626056351003.EXA3    | 45 Exacerbation | Yes |
| AERIS.pl2.G1.45.25626065715001.POSM2   | 45 Stable       | No  |
| AERIS.pl6.B4.45.25626056323000.EXA2    | 45 Exacerbation | Yes |
| AERIS.pl5Bis.H8.45.25626056279000.EXA1 | 45 Exacerbation | No  |
| AERIS.pl2.F10.45.25626067732006.POSM4  | 45 Stable       | Yes |
| AERIS.pl7.F1.45.25626056390002.EXA5    | 45 Exacerbation | Yes |
| AERIS.pl3.C11.45.25626071539004.POSM7  | 45 Stable       | No  |
| AERIS.pl2.E6.46.25626066214008.POSM3   | 46 Stable       | No  |
| AERIS.pl6.A8.46.25626056352000.EXA3    | 46 Exacerbation | Yes |

|                                        |                 |     |
|----------------------------------------|-----------------|-----|
| AERIS.pl3.D2.46.25626068738007.POSM5   | 46 Stable       | No  |
| AERIS.pl3.D11.46.25626071540000.POSM7  | 46 Stable       | No  |
| AERIS.pl6.D11.46.25626056374002.EXA4   | 46 Exacerbation | Yes |
| AERIS.pl4.E7.46.25626076409005.POSM9   | 46 Stable       | Yes |
| AERIS.pl7.G1.46.25626056391009.EXA5    | 46 Exacerbation | Yes |
| AERIS.pl5.H3.48.25626160098009.POSM1   | 48 Stable       | Yes |
| AERIS.pl5Bis.A9.48.25626056280006.EXA1 | 48 Exacerbation | No  |
| AERIS.pl2.H1.48.25626065716008.POSM2   | 48 Stable       | No  |
| AERIS.pl2.F6.48.25626066215005.POSM3   | 48 Stable       | No  |
| AERIS.pl3.E11.48.25626071541007.POSM7  | 48 Stable       | No  |
| AERIS.pl4.F7.48.25626076410001.POSM9   | 48 Stable       | No  |
| AERIS.pl5Bis.B9.50.25626056281003.EXA1 | 50 Exacerbation | No  |
| AERIS.pl4.G7.50.25626076411008.POSM9   | 50 Stable       | Yes |
| AERIS.pl5.A4.51.25626160101006.POSM1   | 51 Stable       | No  |
| AERIS.pl5Bis.C9.51.25626056282000.EXA1 | 51 Exacerbation | No  |
| AERIS.pl6.C4.52.25626056325004.EXA2    | 52 Exacerbation | Yes |
| AERIS.pl5Bis.D9.52.25626056283007.EXA1 | 52 Exacerbation | Yes |
| AERIS.pl6.E11.52.25626056375009.EXA4   | 52 Exacerbation | Yes |
| AERIS.pl4.H7.52.25626076412005.POSM9   | 52 Stable       | Yes |
| AERIS.pl1.G1.52.25626077408007.POSM10  | 52 Stable       | Yes |
| AERIS.pl1.F5.52.25626078412003.POSM11  | 52 Stable       | Yes |
| AERIS.pl1.G9.52.25626079915008.POSM12  | 52 Stable       | Yes |
| AERIS.pl4.C11.53.25626158603000.PREM0  | 53 Stable       | No  |
| AERIS.pl7.C3.53.25626056403009.EXA6    | 53 Exacerbation | Yes |
| AERIS.pl5.B4.53.25626160103000.POSM1   | 53 Stable       | No  |
| AERIS.pl5Bis.F9.53.25626056284004.EXA1 | 53 Exacerbation | No  |
| AERIS.pl2.G6.53.25626066216002.POSM3   | 53 Stable       | Yes |
| AERIS.pl2.G10.53.25626067733003.POSM4  | 53 Stable       | No  |
| AERIS.pl3.F11.53.25626071542004.POSM7  | 53 Stable       | No  |
| AERIS.pl6.D4.53.25626056326001.EXA2    | 53 Exacerbation | No  |
| AERIS.pl6.B8.53.25626056354004.EXA3    | 53 Exacerbation | Yes |
| AERIS.pl4.A8.53.25626076413002.POSM9   | 53 Stable       | No  |
| AERIS.pl1.H1.53.25626077409004.POSM10  | 53 Stable       | No  |
| AERIS.pl1.G5.53.25626078413000.POSM11  | 53 Stable       | No  |
| AERIS.pl5.C4.54.25626160104007.POSM1   | 54 Stable       | No  |
| AERIS.pl5Bis.G9.54.25626056285001.EXA1 | 54 Exacerbation | Yes |
| AERIS.pl1.A2.54.25626077410000.POSM10  | 54 Stable       | No  |
| AERIS.pl1.H9.54.25626079916005.POSM12  | 54 Stable       | Yes |
| AERIS.pl5Bis.H9.55.25626056286008.EXA1 | 55 Exacerbation | Yes |
| AERIS.pl2.H6.55.25626066217009.POSM3   | 55 Stable       | No  |
| AERIS.pl4.F3.55.25626075399000.POSM8   | 55 Stable       | No  |
| AERIS.pl2.A7.56.25626066218006.POSM3   | 56 Stable       | No  |
| AERIS.pl2.H10.56.25626067734000.POSM4  | 56 Stable       | No  |
| AERIS.pl3.C7.56.25626069744007.POSM6   | 56 Stable       | No  |
| AERIS.pl3.G11.56.25626071543001.POSM7  | 56 Stable       | No  |
| AERIS.pl1.B2.56.25626077411007.POSM10  | 56 Stable       | No  |
| AERIS.pl5.D4.57.25626160107008.POSM1   | 57 Stable       | No  |

|                                         |                 |     |
|-----------------------------------------|-----------------|-----|
| AERIS.pl5Bis.A10.57.25626056287005.EXA1 | 57 Exacerbation | No  |
| AERIS.pl2.B7.57.25626066219003.POSM3    | 57 Stable       | No  |
| AERIS.pl3.E2.57.25626068739004.POSM5    | 57 Stable       | No  |
| AERIS.pl1.A10.57.25626079917002.POSM12  | 57 Stable       | No  |
| AERIS.pl4.D11.58.25626158608005.PREM0   | 58 Stable       | No  |
| AERIS.pl5Bis.B10.58.25626056288002.EXA1 | 58 Exacerbation | Yes |
| AERIS.pl2.A2.58.25626065717005.POSM2    | 58 Stable       | No  |
| AERIS.pl2.C7.58.25626066220009.POSM3    | 58 Stable       | No  |
| AERIS.pl3.D7.58.25626069745004.POSM6    | 58 Stable       | Yes |
| AERIS.pl3.H11.58.25626071544008.POSM7   | 58 Stable       | No  |
| AERIS.pl4.B8.58.25626076414009.POSM9    | 58 Stable       | No  |
| AERIS.pl1.C2.58.25626077412004.POSM10   | 58 Stable       | No  |
| AERIS.pl6.C8.58.25626056355001.EXA3     | 58 Exacerbation | Yes |
| AERIS.pl1.B10.58.25626079918009.POSM12  | 58 Stable       | No  |
| AERIS.pl4.E11.59.25626158609002.PREM0   | 59 Stable       | No  |
| AERIS.pl5Bis.C10.59.25626056289009.EXA1 | 59 Exacerbation | No  |
| AERIS.pl2.B2.59.25626065718002.POSM2    | 59 Stable       | No  |
| AERIS.pl2.D7.59.25626066221006.POSM3    | 59 Stable       | No  |
| AERIS.pl2.A11.59.25626067735007.POSM4   | 59 Stable       | No  |
| AERIS.pl3.F2.59.25626068740000.POSM5    | 59 Stable       | No  |
| AERIS.pl3.E7.59.25626069746001.POSM6    | 59 Stable       | No  |
| AERIS.pl3.A12.59.25626071545005.POSM7   | 59 Stable       | No  |
| AERIS.pl4.C8.59.25626076415006.POSM9    | 59 Stable       | No  |
| AERIS.pl1.H5.59.25626078414007.POSM11   | 59 Stable       | No  |
| AERIS.pl4.F11.60.25626158610008.PREM0   | 60 Stable       | Yes |
| AERIS.pl6.E4.60.25626056327008.EXA2     | 60 Exacerbation | Yes |
| AERIS.pl2.B11.60.25626067736004.POSM4   | 60 Stable       | No  |
| AERIS.pl3.F7.60.25626069747008.POSM6    | 60 Stable       | No  |
| AERIS.pl6.F11.60.25626056376006.EXA4    | 60 Exacerbation | Yes |
| AERIS.pl4.D8.60.25626076416003.POSM9    | 60 Stable       | No  |
| AERIS.pl1.D2.60.25626077413001.POSM10   | 60 Stable       | Yes |
| AERIS.pl1.C10.60.25626079919006.POSM12  | 60 Stable       | No  |
| AERIS.pl5Bis.D10.61.25626056291002.EXA1 | 61 Exacerbation | No  |
| AERIS.pl2.C2.61.25626065719009.POSM2    | 61 Stable       | No  |
| AERIS.pl4.G11.63.25626158613009.PREM0   | 63 Stable       | No  |
| AERIS.pl5Bis.E10.63.25626056292009.EXA1 | 63 Exacerbation | Yes |
| AERIS.pl5.E4.63.25626160113009.POSM1    | 63 Stable       | No  |
| AERIS.pl2.E2.63.25626065721002.POSM2    | 63 Stable       | No  |
| AERIS.pl2.E7.63.25626066222003.POSM3    | 63 Stable       | No  |
| AERIS.pl6.D8.63.25626056356008.EXA3     | 63 Exacerbation | Yes |
| AERIS.pl3.G7.63.25626069748005.POSM6    | 63 Stable       | No  |
| AERIS.pl4.G3.63.25626075400003.POSM8    | 63 Stable       | No  |
| AERIS.pl1.A6.63.25626078415004.POSM11   | 63 Stable       | Yes |
| AERIS.pl4.H11.64.25626158614006.PREM0   | 64 Stable       | No  |
| AERIS.pl5.F4.64.25626160114006.POSM1    | 64 Stable       | No  |
| AERIS.pl2.F2.64.25626065722009.POSM2    | 64 Stable       | No  |
| AERIS.pl2.C11.64.25626067737001.POSM4   | 64 Stable       | No  |

|                                         |                 |     |
|-----------------------------------------|-----------------|-----|
| AERIS.pl3.B12.64.25626071546002.POSM7   | 64 Stable       | No  |
| AERIS.pl4.H3.64.25626075401000.POSM8    | 64 Stable       | No  |
| AERIS.pl5Bis.F10.64.25626056293006.EXA1 | 64 Exacerbation | Yes |
| AERIS.pl1.B6.64.25626078416001.POSM11   | 64 Stable       | Yes |
| AERIS.pl6.F4.66.25626056328005.EXA2     | 66 Exacerbation | Yes |
| AERIS.pl6.E8.66.25626056357005.EXA3     | 66 Exacerbation | No  |
| AERIS.pl4.A12.68.25626158618004.PREM0   | 68 Stable       | No  |
| AERIS.pl5Bis.G10.68.25626056294003.EXA1 | 68 Exacerbation | No  |
| AERIS.pl5.G4.68.25626160118004.POSM1    | 68 Stable       | No  |
| AERIS.pl2.G2.68.25626065723006.POSM2    | 68 Stable       | No  |
| AERIS.pl6.A3.68.25626056307000.EXA10    | 68 Exacerbation | No  |
| AERIS.pl6.F8.68.25626056358002.EXA3     | 68 Exacerbation | Yes |
| AERIS.pl6.G11.68.25626056377003.EXA4    | 68 Exacerbation | No  |
| AERIS.pl7.A4.68.25626056408004.EXA7     | 68 Exacerbation | No  |
| AERIS.pl4.B12.70.25626158620007.PREM0   | 70 Stable       | No  |
| AERIS.pl5.H4.70.25626160120007.POSM1    | 70 Stable       | No  |
| AERIS.pl5Bis.H10.70.25626056295000.EXA1 | 70 Exacerbation | No  |
| AERIS.pl2.H2.70.25626065724003.POSM2    | 70 Stable       | No  |
| AERIS.pl2.F7.70.25626066223000.POSM3    | 70 Stable       | No  |
| AERIS.pl3.C12.70.25626071547009.POSM7   | 70 Stable       | No  |
| AERIS.pl4.A4.70.25626075402007.POSM8    | 70 Stable       | No  |
| AERIS.pl7.H1.70.25626056392006.EXA5     | 70 Exacerbation | No  |
| AERIS.pl6.H11.70.25626056378000.EXA4    | 70 Exacerbation | Yes |
| AERIS.pl1.C6.70.25626078417008.POSM11   | 70 Stable       | No  |
| AERIS.pl4.C12.71.25626158621004.PREM0   | 71 Stable       | No  |
| AERIS.pl6.G4.71.25626056329002.EXA2     | 71 Exacerbation | Yes |
| AERIS.pl2.G7.71.25626066224007.POSM3    | 71 Stable       | No  |
| AERIS.pl2.D11.71.25626067738008.POSM4   | 71 Stable       | Yes |
| AERIS.pl4.D12.73.25626158623008.PREM0   | 73 Stable       | No  |
| AERIS.pl5.A5.73.25626160123008.POSM1    | 73 Stable       | No  |
| AERIS.pl2.A3.73.25626065725000.POSM2    | 73 Stable       | Yes |
| AERIS.pl5Bis.A11.73.25626056296007.EXA1 | 73 Exacerbation | Yes |
| AERIS.pl4.B4.73.25626075403004.POSM8    | 73 Stable       | Yes |
| AERIS.pl1.E2.73.25626077414008.POSM10   | 73 Stable       | Yes |
| AERIS.pl1.D6.73.25626078418005.POSM11   | 73 Stable       | Yes |
| AERIS.pl6.H4.73.25626056330008.EXA2     | 73 Exacerbation | Yes |
| AERIS.pl5Bis.B11.74.25626056297004.EXA1 | 74 Exacerbation | Yes |
| AERIS.pl6.G8.74.25626056359009.EXA3     | 74 Exacerbation | Yes |
| AERIS.pl2.E11.74.25626067739005.POSM4   | 74 Stable       | Yes |
| AERIS.pl6.A12.74.25626056379007.EXA4    | 74 Exacerbation | Yes |
| AERIS.pl7.B4.74.25626056409001.EXA7     | 74 Exacerbation | Yes |
| AERIS.pl7.A2.74.25626056393003.EXA5     | 74 Exacerbation | Yes |
| AERIS.pl7.D3.74.25626056404006.EXA6     | 74 Exacerbation | Yes |
| AERIS.pl1.D10.74.25626079920002.POSM12  | 74 Stable       | Yes |
| AERIS.pl4.E12.75.25626158625002.PREM0   | 75 Stable       | No  |
| AERIS.pl1.E10.75.25626079921009.POSM12  | 75 Stable       | Yes |
| AERIS.pl4.C4.76.25626075404001.POSM8    | 76 Stable       | No  |

|                                         |                 |     |
|-----------------------------------------|-----------------|-----|
| AERIS.pl1.E6.76.25626078419002.POSM11   | 76 Stable       | No  |
| AERIS.pl1.F10.76.25626079922006.POSM12  | 76 Stable       | No  |
| AERIS.pl1.F6.78.25626078420008.POSM11   | 78 Stable       | Yes |
| AERIS.pl4.F12.80.25626158630006.PREM0   | 80 Stable       | No  |
| AERIS.pl5.B5.80.25626160130006.POSM1    | 80 Stable       | No  |
| AERIS.pl5Bis.C11.80.25626056298001.EXA1 | 80 Exacerbation | No  |
| AERIS.pl3.G2.80.25626068741007.POSM5    | 80 Stable       | No  |
| AERIS.pl3.H7.80.25626069749002.POSM6    | 80 Stable       | No  |
| AERIS.pl3.D12.80.25626071548006.POSM7   | 80 Stable       | Yes |
| AERIS.pl6.A5.80.25626056331005.EXA2     | 80 Exacerbation | No  |
| AERIS.pl6.H8.80.25626056360005.EXA3     | 80 Exacerbation | Yes |
| AERIS.pl7.B2.80.25626056394000.EXA5     | 80 Exacerbation | Yes |
| AERIS.pl1.F2.80.25626077415005.POSM10   | 80 Stable       | Yes |
| AERIS.pl6.B12.80.25626056380003.EXA4    | 80 Exacerbation | Yes |
| AERIS.pl1.G6.80.25626078421005.POSM11   | 80 Stable       | No  |
| AERIS.pl4.D4.81.25626075405008.POSM8    | 81 Stable       | No  |
| AERIS.pl2.B3.82.25626065726007.POSM2    | 82 Stable       | Yes |
| AERIS.pl3.A8.82.25626069750008.POSM6    | 82 Stable       | Yes |
| AERIS.pl1.G2.82.25626077416002.POSM10   | 82 Stable       | Yes |
| AERIS.pl1.G10.82.25626079923003.POSM12  | 82 Stable       | Yes |
| AERIS.pl5.C5.83.25626160133007.POSM1    | 83 Stable       | No  |
| AERIS.pl5Bis.D11.83.25626056299008.EXA1 | 83 Exacerbation | Yes |
| AERIS.pl2.H7.83.25626066225004.POSM3    | 83 Stable       | Yes |
| AERIS.pl3.H2.83.25626068742004.POSM5    | 83 Stable       | Yes |
| AERIS.pl3.B8.83.25626069751005.POSM6    | 83 Stable       | Yes |
| AERIS.pl3.E12.83.25626071549003.POSM7   | 83 Stable       | Yes |
| AERIS.pl4.E8.83.25626076417000.POSM9    | 83 Stable       | Yes |
| AERIS.pl5.D5.84.25626160134004.POSM1    | 84 Stable       | No  |
| AERIS.pl2.A8.84.25626066226001.POSM3    | 84 Stable       | No  |
| AERIS.pl5Bis.E11.84.25626056300001.EXA1 | 84 Exacerbation | No  |
| AERIS.pl4.F8.84.25626076418007.POSM9    | 84 Stable       | No  |
| AERIS.pl4.G12.85.25626158635001.PREM0   | 85 Stable       | No  |
| AERIS.pl5.E5.85.25626160135001.POSM1    | 85 Stable       | No  |
| AERIS.pl3.A3.85.25626068743001.POSM5    | 85 Stable       | No  |
| AERIS.pl3.C8.85.25626069752002.POSM6    | 85 Stable       | Yes |
| AERIS.pl4.E4.85.25626075406005.POSM8    | 85 Stable       | No  |
| AERIS.pl4.G8.85.25626076419004.POSM9    | 85 Stable       | No  |
| AERIS.pl1.H2.85.25626077417009.POSM10   | 85 Stable       | No  |
| AERIS.pl1.H6.85.25626078422002.POSM11   | 85 Stable       | No  |
| AERIS.pl4.H12.86.25626158636008.PREM0   | 86 Stable       | No  |
| AERIS.pl5.F5.86.25626160136008.POSM1    | 86 Stable       | No  |
| AERIS.pl2.C3.86.25626065727004.POSM2    | 86 Stable       | No  |
| AERIS.pl2.B8.86.25626066227008.POSM3    | 86 Stable       | Yes |
| AERIS.pl2.F11.86.25626067740001.POSM4   | 86 Stable       | No  |
| AERIS.pl5Bis.F11.86.25626056301008.EXA1 | 86 Exacerbation | Yes |
| AERIS.pl4.F4.86.25626075407002.POSM8    | 86 Stable       | No  |
| AERIS.pl6.A9.86.25626056361002.EXA3     | 86 Exacerbation | No  |



|                                         |                  |     |
|-----------------------------------------|------------------|-----|
| AERIS.pl7.C2.86.25626056395007.EXA5     | 86 Exacerbation  | No  |
| AERIS.pl1.A7.86.25626078423009.POSM11   | 86 Stable        | No  |
| AERIS.pl6.C12.86.25626056381000.EXA4    | 86 Exacerbation  | No  |
| AERIS.pl5Bis.G11.92.25626056302005.EXA1 | 92 Exacerbation  | Yes |
| AERIS.pl5.G5.93.25626160143006.POSM1    | 93 Stable        | No  |
| AERIS.pl2.D3.93.25626065728001.POSM2    | 93 Stable        | No  |
| AERIS.pl5Bis.H11.93.25626056303002.EXA1 | 93 Exacerbation  | No  |
| AERIS.pl2.C8.93.25626066228005.POSM3    | 93 Stable        | Yes |
| AERIS.pl2.G11.93.25626067741008.POSM4   | 93 Stable        | No  |
| AERIS.pl3.B3.93.25626068744008.POSM5    | 93 Stable        | No  |
| AERIS.pl3.D8.93.25626069753009.POSM6    | 93 Stable        | No  |
| AERIS.pl3.F12.93.25626071550009.POSM7   | 93 Stable        | No  |
| AERIS.pl4.G4.93.25626075408009.POSM8    | 93 Stable        | No  |
| AERIS.pl4.H8.93.25626076420000.POSM9    | 93 Stable        | No  |
| AERIS.pl1.A3.93.25626077418006.POSM10   | 93 Stable        | No  |
| AERIS.pl1.B7.93.25626078424006.POSM11   | 93 Stable        | No  |
| AERIS.pl1.H10.93.25626079924000.POSM12  | 93 Stable        | No  |
| AERIS.pl5.A1.94.25626158644003.PREMO    | 94 Stable        | No  |
| AERIS.pl6.B9.94.25626056362009.EXA3     | 94 Exacerbation  | No  |
| AERIS.pl5Bis.A12.94.25626056304009.EXA1 | 94 Exacerbation  | No  |
| AERIS.pl2.E3.94.25626065729008.POSM2    | 94 Stable        | No  |
| AERIS.pl7.E3.94.25626056405003.EXA6     | 94 Exacerbation  | No  |
| AERIS.pl6.B5.94.25626056332002.EXA2     | 94 Exacerbation  | No  |
| AERIS.pl3.E8.94.25626069754006.POSM6    | 94 Stable        | No  |
| AERIS.pl6.D12.94.25626056382007.EXA4    | 94 Exacerbation  | Yes |
| AERIS.pl1.C7.94.25626078425003.POSM11   | 94 Stable        | Yes |
| AERIS.pl5.B1.95.25626158645000.PREMO    | 95 Stable        | No  |
| AERIS.pl5Bis.B12.95.25626056305006.EXA1 | 95 Exacerbation  | No  |
| AERIS.pl6.C5.95.25626056333009.EXA2     | 95 Exacerbation  | Yes |
| AERIS.pl2.F3.95.25626065730004.POSM2    | 95 Stable        | No  |
| AERIS.pl2.D8.95.25626066229002.POSM3    | 95 Stable        | No  |
| AERIS.pl6.C9.95.25626056363006.EXA3     | 95 Exacerbation  | No  |
| AERIS.pl3.C3.95.25626068745005.POSM5    | 95 Stable        | No  |
| AERIS.pl3.G12.95.25626071551006.POSM7   | 95 Stable        | No  |
| AERIS.pl4.H4.95.25626075409006.POSM8    | 95 Stable        | No  |
| AERIS.pl1.D7.95.25626078426000.POSM11   | 95 Stable        | No  |
| AERIS.pl1.A11.95.25626079925007.POSM12  | 95 Stable        | No  |
| AERIS.pl5.H5.97.25626160147004.POSM1    | 97 Stable        | No  |
| AERIS.pl2.G3.97.25626065731001.POSM2    | 97 Stable        | No  |
| AERIS.pl2.E8.97.25626066230008.POSM3    | 97 Stable        | No  |
| AERIS.pl3.G8.97.25626069756000.POSM6    | 97 Stable        | No  |
| AERIS.pl5Bis.C12.97.25626056306003.EXA1 | 97 Exacerbation  | No  |
| AERIS.pl4.A9.97.25626076421007.POSM9    | 97 Stable        | No  |
| AERIS.pl5.C1.101.25626158651001.PREMO   | 101 Stable       | No  |
| AERIS.pl6.D5.101.25626056309004.EXA2    | 101 Exacerbation | No  |
| AERIS.pl2.F8.101.25626066231005.POSM3   | 101 Stable       | No  |
| AERIS.pl3.F3.101.25626068747009.POSM5   | 101 Stable       | No  |

|                                          |                  |     |
|------------------------------------------|------------------|-----|
| AERIS.pl3.H12.101.25626071552003.POSM7   | 101 Stable       | No  |
| AERIS.pl4.A5.101.25626075410002.POSM8    | 101 Stable       | No  |
| AERIS.pl6.D9.101.25626056334006.EXA3     | 101 Exacerbation | Yes |
| AERIS.pl4.B9.101.25626076422004.POSM9    | 101 Stable       | No  |
| AERIS.pl1.B3.101.25626077419003.POSM10   | 101 Stable       | No  |
| AERIS.pl1.E7.101.25626078427007.POSM11   | 101 Stable       | No  |
| AERIS.pl5.D1.102.25626158652008.PREM0    | 102 Stable       | No  |
| AERIS.pl5Bis.D12.102.25626056247009.EXA1 | 102 Exacerbation | No  |
| AERIS.pl5.A6.102.25626160152008.POSM1    | 102 Stable       | No  |
| AERIS.pl2.H3.102.25626065732008.POSM2    | 102 Stable       | No  |
| AERIS.pl3.H8.102.25626069757007.POSM6    | 102 Stable       | No  |
| AERIS.pl4.A1.102.25626071553000.POSM7    | 102 Stable       | No  |
| AERIS.pl2.A4.103.25626065733005.POSM2    | 103 Stable       | No  |
| AERIS.pl5.E1.104.25626158654002.PREM0    | 104 Stable       | No  |
| AERIS.pl5Bis.E12.104.25626056248006.EXA1 | 104 Exacerbation | No  |
| AERIS.pl6.E5.104.25626056310000.EXA2     | 104 Exacerbation | Yes |
| AERIS.pl2.B4.104.25626065734002.POSM2    | 104 Stable       | No  |
| AERIS.pl3.G3.104.25626068748006.POSM5    | 104 Stable       | No  |
| AERIS.pl3.A9.104.25626069758004.POSM6    | 104 Stable       | No  |
| AERIS.pl4.B1.104.25626071554007.POSM7    | 104 Stable       | No  |
| AERIS.pl4.B5.104.25626075411009.POSM8    | 104 Stable       | No  |
| AERIS.pl1.C3.104.25626077420009.POSM10   | 104 Stable       | Yes |
| AERIS.pl1.F7.104.25626078428004.POSM11   | 104 Stable       | Yes |
| AERIS.pl1.C11.104.25626079927001.POSM12  | 104 Stable       | No  |
| AERIS.pl5.F1.109.25626158659007.PREM0    | 109 Stable       | No  |
| AERIS.pl2.H11.111.25626067742005.POSM4   | 111 Stable       | No  |
| AERIS.pl3.B9.111.25626069759001.POSM6    | 111 Stable       | No  |
| AERIS.pl4.C1.111.25626071555004.POSM7    | 111 Stable       | No  |
| AERIS.pl6.F5.111.25626056311007.EXA2     | 111 Exacerbation | Yes |
| AERIS.pl5Bis.F12.111.25626056250009.EXA1 | 111 Exacerbation | No  |
| AERIS.pl5.G1.112.25626158662007.PREM0    | 112 Stable       | No  |
| AERIS.pl5Bis.G12.112.25626056251006.EXA1 | 112 Exacerbation | Yes |
| AERIS.pl1.D3.112.25626077421006.POSM10   | 112 Stable       | Yes |
| AERIS.pl5.H1.113.25626158663004.PREM0    | 113 Stable       | No  |
| AERIS.pl1.E3.113.25626077422003.POSM10   | 113 Stable       | No  |
| AERIS.pl3.H3.115.25626068749003.POSM5    | 115 Stable       | No  |
| AERIS.pl5Bis.H12.115.25626056252003.EXA1 | 115 Exacerbation | Yes |
| AERIS.pl5.B6.118.25626160168009.POSM1    | 118 Stable       | No  |
| AERIS.pl6.A1.118.25626056253000.EXA1     | 118 Exacerbation | Yes |
| AERIS.pl6.G5.118.25626056312004.EXA2     | 118 Exacerbation | Yes |
| AERIS.pl2.G8.118.25626066232002.POSM3    | 118 Stable       | No  |
| AERIS.pl3.A4.118.25626068750009.POSM5    | 118 Stable       | No  |
| AERIS.pl4.D1.118.25626071556001.POSM7    | 118 Stable       | Yes |
| AERIS.pl6.F9.118.25626056335003.EXA3     | 118 Exacerbation | Yes |
| AERIS.pl1.G7.118.25626078429001.POSM11   | 118 Stable       | Yes |
| AERIS.pl5.A2.120.25626158670002.PREM0    | 120 Stable       | No  |
| AERIS.pl2.A12.120.25626067743002.POSM4   | 120 Stable       | No  |

|                                         |                  |     |
|-----------------------------------------|------------------|-----|
| AERIS.pl3.B4.120.25626068751006.POSM5   | 120 Stable       | No  |
| AERIS.pl4.C5.120.25626075412006.POSM8   | 120 Stable       | No  |
| AERIS.pl6.B1.120.25626056254007.EXA1    | 120 Exacerbation | Yes |
| AERIS.pl4.C9.120.25626076423001.POSM9   | 120 Stable       | No  |
| AERIS.pl1.F3.120.25626077423000.POSM10  | 120 Stable       | No  |
| AERIS.pl7.F3.120.25626056397001.EXA6    | 120 Exacerbation | Yes |
| AERIS.pl5.B2.121.25626158671009.PREM0   | 121 Stable       | No  |
| AERIS.pl5.C6.121.25626160171009.POSM1   | 121 Stable       | Yes |
| AERIS.pl2.H8.121.25626066233009.POSM3   | 121 Stable       | No  |
| AERIS.pl2.B12.121.25626067744009.POSM4  | 121 Stable       | No  |
| AERIS.pl3.C4.121.25626068752003.POSM5   | 121 Stable       | No  |
| AERIS.pl4.E1.121.25626071557008.POSM7   | 121 Stable       | No  |
| AERIS.pl4.D5.121.25626075413003.POSM8   | 121 Stable       | No  |
| AERIS.pl4.D9.121.25626076424008.POSM9   | 121 Stable       | No  |
| AERIS.pl1.H7.121.25626078430007.POSM11  | 121 Stable       | Yes |
| AERIS.pl1.D11.121.25626079928008.POSM12 | 121 Stable       | Yes |
| AERIS.pl6.C1.122.25626056255004.EXA1    | 122 Exacerbation | Yes |
| AERIS.pl5.D6.122.25626160172006.POSM1   | 122 Stable       | Yes |
| AERIS.pl6.H5.122.25626056313001.EXA2    | 122 Exacerbation | Yes |
| AERIS.pl3.C9.122.25626069760007.POSM6   | 122 Stable       | No  |
| AERIS.pl4.E5.122.25626075414000.POSM8   | 122 Stable       | No  |
| AERIS.pl4.F9.122.25626076425005.POSM9   | 122 Stable       | Yes |
| AERIS.pl6.G9.122.25626056336000.EXA3    | 122 Exacerbation | No  |
| AERIS.pl1.G3.122.25626077424007.POSM10  | 122 Stable       | No  |
| AERIS.pl6.D1.124.25626056256001.EXA1    | 124 Exacerbation | No  |
| AERIS.pl4.F5.124.25626075415007.POSM8   | 124 Stable       | No  |
| AERIS.pl4.G9.125.25626076426002.POSM9   | 125 Stable       | No  |
| AERIS.pl5.C2.126.25626158676004.PREM0   | 126 Stable       | No  |
| AERIS.pl5.F6.126.25626160176004.POSM1   | 126 Stable       | Yes |
| AERIS.pl5.D2.127.25626158677001.PREM0   | 127 Stable       | No  |
| AERIS.pl5.G6.127.25626160177001.POSM1   | 127 Stable       | No  |
| AERIS.pl2.C4.127.25626065735009.POSM2   | 127 Stable       | Yes |
| AERIS.pl6.E1.127.25626056257008.EXA1    | 127 Exacerbation | No  |
| AERIS.pl1.E11.127.25626079929005.POSM12 | 127 Stable       | No  |
| AERIS.pl6.F1.128.25626056258005.EXA1    | 128 Exacerbation | No  |
| AERIS.pl2.D4.131.25626065736006.POSM2   | 131 Stable       | Yes |
| AERIS.pl6.H9.132.25626056337007.EXA3    | 132 Exacerbation | Yes |
| AERIS.pl4.F1.132.25626071558005.POSM7   | 132 Stable       | Yes |
| AERIS.pl4.G5.132.25626075416004.POSM8   | 132 Stable       | Yes |
| AERIS.pl6.A6.132.25626056314008.EXA2    | 132 Exacerbation | Yes |
| AERIS.pl1.A8.132.25626078431004.POSM11  | 132 Stable       | Yes |
| AERIS.pl6.G1.135.25626056259002.EXA1    | 135 Exacerbation | No  |
| AERIS.pl2.E4.135.25626065737003.POSM2   | 135 Stable       | No  |
| AERIS.pl4.G1.135.25626071559002.POSM7   | 135 Stable       | No  |
| AERIS.pl6.E12.135.25626056364003.EXA4   | 135 Exacerbation | No  |
| AERIS.pl3.D4.136.25626068753000.POSM5   | 136 Stable       | Yes |
| AERIS.pl4.H1.136.25626071560008.POSM7   | 136 Stable       | No  |

|                                         |                  |     |
|-----------------------------------------|------------------|-----|
| AERIS.pl1.H3.136.25626077425004.POSM10  | 136 Stable       | No  |
| AERIS.pl6.A10.136.25626056338004.EXA3   | 136 Exacerbation | No  |
| AERIS.pl1.G11.136.25626079931008.POSM12 | 136 Stable       | No  |
| AERIS.pl6.H1.137.25626056260008.EXA1    | 137 Exacerbation | Yes |
| AERIS.pl5.E2.138.25626158688007.PREM0   | 138 Stable       | No  |
| AERIS.pl5.H6.138.25626160188007.POSM1   | 138 Stable       | No  |
| AERIS.pl2.C12.138.25626067745006.POSM4  | 138 Stable       | No  |
| AERIS.pl3.D9.138.25626069761004.POSM6   | 138 Stable       | No  |
| AERIS.pl4.H5.138.25626075417001.POSM8   | 138 Stable       | No  |
| AERIS.pl1.A4.138.25626077426001.POSM10  | 138 Stable       | No  |
| AERIS.pl6.A2.138.25626056261005.EXA1    | 138 Exacerbation | Yes |
| AERIS.pl1.B8.138.25626078432001.POSM11  | 138 Stable       | Yes |
| AERIS.pl1.H11.138.25626079932005.POSM12 | 138 Stable       | Yes |
| AERIS.pl5.F2.141.25626158691007.PREM0   | 141 Stable       | No  |
| AERIS.pl5.A7.141.25626160191007.POSM1   | 141 Stable       | No  |
| AERIS.pl2.F4.141.25626065738000.POSM2   | 141 Stable       | No  |
| AERIS.pl2.A9.141.25626066234006.POSM3   | 141 Stable       | No  |
| AERIS.pl2.D12.141.25626067746003.POSM4  | 141 Stable       | No  |
| AERIS.pl3.E4.141.25626068754007.POSM5   | 141 Stable       | No  |
| AERIS.pl6.B2.141.25626056262002.EXA1    | 141 Exacerbation | Yes |
| AERIS.pl4.A2.141.25626071561005.POSM7   | 141 Stable       | No  |
| AERIS.pl4.A6.141.25626075418008.POSM8   | 141 Stable       | No  |
| AERIS.pl1.B4.141.25626077427008.POSM10  | 141 Stable       | No  |
| AERIS.pl1.C8.141.25626078433008.POSM11  | 141 Stable       | Yes |
| AERIS.pl1.A12.141.25626079933002.POSM12 | 141 Stable       | No  |
| AERIS.pl5.G2.142.25626158692004.PREM0   | 142 Stable       | No  |
| AERIS.pl5.B7.142.25626160192004.POSM1   | 142 Stable       | No  |
| AERIS.pl6.C2.142.25626056263009.EXA1    | 142 Exacerbation | Yes |
| AERIS.pl2.E12.142.25626067747000.POSM4  | 142 Stable       | No  |
| AERIS.pl3.F4.142.25626068755004.POSM5   | 142 Stable       | Yes |
| AERIS.pl6.B6.142.25626056315005.EXA2    | 142 Exacerbation | Yes |
| AERIS.pl4.H9.142.25626076427009.POSM9   | 142 Stable       | Yes |
| AERIS.pl6.B10.142.25626056339001.EXA3   | 142 Exacerbation | Yes |
| AERIS.pl6.F12.142.25626056365000.EXA4   | 142 Exacerbation | Yes |
| AERIS.pl1.B12.142.25626079934009.POSM12 | 142 Stable       | Yes |
| AERIS.pl5.H2.144.25626158694008.PREM0   | 144 Stable       | No  |
| AERIS.pl2.B9.144.25626066235003.POSM3   | 144 Stable       | No  |
| AERIS.pl3.G4.144.25626068756001.POSM5   | 144 Stable       | No  |
| AERIS.pl6.D2.144.25626056264006.EXA1    | 144 Exacerbation | Yes |
| AERIS.pl6.E2.145.25626056265003.EXA1    | 145 Exacerbation | No  |
| AERIS.pl6.C10.145.25626056340007.EXA3   | 145 Exacerbation | Yes |
| AERIS.pl1.C12.145.25626079935006.POSM12 | 145 Stable       | Yes |
| AERIS.pl2.G4.146.25626065739007.POSM2   | 146 Stable       | No  |
| AERIS.pl2.F12.146.25626067748007.POSM4  | 146 Stable       | No  |
| AERIS.pl6.F2.146.25626056266000.EXA1    | 146 Exacerbation | No  |
| AERIS.pl4.B2.146.25626071562002.POSM7   | 146 Stable       | No  |
| AERIS.pl6.D10.146.25626056341004.EXA3   | 146 Exacerbation | No  |

|                                         |                  |     |
|-----------------------------------------|------------------|-----|
| AERIS.pl4.B6.146.25626075419005.POSM8   | 146 Stable       | No  |
| AERIS.pl6.C6.146.25626056316002.EXA2    | 146 Exacerbation | Yes |
| AERIS.pl1.C4.146.25626077428005.POSM10  | 146 Stable       | No  |
| AERIS.pl6.G12.146.25626056366007.EXA4   | 146 Exacerbation | Yes |
| AERIS.pl1.D8.146.25626078434005.POSM11  | 146 Stable       | Yes |
| AERIS.pl2.G12.147.25626067749004.POSM4  | 147 Stable       | No  |
| AERIS.pl6.G2.147.25626056267007.EXA1    | 147 Exacerbation | No  |
| AERIS.pl4.C6.147.25626075420001.POSM8   | 147 Stable       | Yes |
| AERIS.pl4.A10.147.25626076428006.POSM9  | 147 Stable       | No  |
| AERIS.pl1.D12.147.25626079936003.POSM12 | 147 Stable       | Yes |
| AERIS.pl4.B10.149.25626076429003.POSM9  | 149 Stable       | No  |
| AERIS.pl3.F9.150.25626069762001.POSM6   | 150 Stable       | No  |
| AERIS.pl5.A3.151.25626158701003.PREM0   | 151 Stable       | No  |
| AERIS.pl5.C7.151.25626160201003.POSM1   | 151 Stable       | No  |
| AERIS.pl2.H4.151.25626065740003.POSM2   | 151 Stable       | No  |
| AERIS.pl2.C9.151.25626066236000.POSM3   | 151 Stable       | No  |
| AERIS.pl2.H12.151.25626067750000.POSM4  | 151 Stable       | No  |
| AERIS.pl6.H2.151.25626056269001.EXA1    | 151 Exacerbation | Yes |
| AERIS.pl3.H4.151.25626068757008.POSM5   | 151 Stable       | No  |
| AERIS.pl4.C2.151.25626071563009.POSM7   | 151 Stable       | No  |
| AERIS.pl4.D6.151.25626075421008.POSM8   | 151 Stable       | Yes |
| AERIS.pl6.D6.151.25626056317009.EXA2    | 151 Exacerbation | Yes |
| AERIS.pl1.E12.151.25626079937000.POSM12 | 151 Stable       | Yes |



|            |   |   |          |   |   |   |   |          |
|------------|---|---|----------|---|---|---|---|----------|
| 27/07/2011 | 0 | 0 | 0        | 0 | 0 | 0 | 0 | 0        |
| 03/08/2011 | 0 | 0 | 0        | 0 | 0 | 0 | 0 | 0        |
| 24/11/2011 | 0 | 0 | 0        | 0 | 0 | 0 | 0 | 0        |
| 16/01/2012 | 0 | 0 | 0        | 0 | 0 | 0 | 0 | 3.29E-05 |
| 30/01/2012 | 0 | 0 | 0        | 0 | 0 | 0 | 0 | 0        |
| 24/02/2012 | 0 | 0 | 0        | 0 | 0 | 0 | 0 | 0        |
| 26/03/2012 | 0 | 0 | 0        | 0 | 0 | 0 | 0 | 0        |
| 25/05/2012 | 0 | 0 | 0        | 0 | 0 | 0 | 0 | 0        |
| 29/06/2012 | 0 | 0 | 0        | 0 | 0 | 0 | 0 | 0        |
| 10/08/2011 | 0 | 0 | 0        | 0 | 0 | 0 | 0 | 0        |
| 01/12/2011 | 0 | 0 | 0        | 0 | 0 | 0 | 0 | 0        |
| 09/02/2012 | 0 | 0 | 0        | 0 | 0 | 0 | 0 | 0        |
| 10/05/2012 | 0 | 0 | 0        | 0 | 0 | 0 | 0 | 0        |
| 13/06/2012 | 0 | 0 | 0        | 0 | 0 | 0 | 0 | 0        |
| 05/12/2011 | 0 | 0 | 0        | 0 | 0 | 0 | 0 | 0        |
| 14/12/2011 | 0 | 0 | 0        | 0 | 0 | 0 | 0 | 0        |
| 29/12/2011 | 0 | 0 | 0        | 0 | 0 | 0 | 0 | 0        |
| 16/01/2012 | 0 | 0 | 0        | 0 | 0 | 0 | 0 | 0        |
| 16/02/2012 | 0 | 0 | 0        | 0 | 0 | 0 | 0 | 0        |
| 20/08/2012 | 0 | 0 | 0        | 0 | 0 | 0 | 0 | 0        |
| 28/10/2011 | 0 | 0 | 0        | 0 | 0 | 0 | 0 | 0        |
| 20/01/2012 | 0 | 0 | 0        | 0 | 0 | 0 | 0 | 0        |
| 21/02/2012 | 0 | 0 | 3.29E-05 | 0 | 0 | 0 | 0 | 0        |
| 22/03/2012 | 0 | 0 | 0        | 0 | 0 | 0 | 0 | 0        |
| 14/09/2011 | 0 | 0 | 0        | 0 | 0 | 0 | 0 | 0        |
| 13/01/2012 | 0 | 0 | 0        | 0 | 0 | 0 | 0 | 0        |
| 24/01/2012 | 0 | 0 | 0        | 0 | 0 | 0 | 0 | 0        |
| 30/01/2012 | 0 | 0 | 0        | 0 | 0 | 0 | 0 | 0        |
| 05/03/2012 | 0 | 0 | 0        | 0 | 0 | 0 | 0 | 0        |
| 27/03/2012 | 0 | 0 | 0        | 0 | 0 | 0 | 0 | 0        |
| 30/11/2011 | 0 | 0 | 0        | 0 | 0 | 0 | 0 | 0        |
| 08/12/2011 | 0 | 0 | 0        | 0 | 0 | 0 | 0 | 0        |
| 14/02/2012 | 0 | 0 | 0        | 0 | 0 | 0 | 0 | 0        |
| 02/03/2012 | 0 | 0 | 0        | 0 | 0 | 0 | 0 | 0        |
| 03/05/2012 | 0 | 0 | 0        | 0 | 0 | 0 | 0 | 0        |
| 26/07/2012 | 0 | 0 | 0        | 0 | 0 | 0 | 0 | 0        |
| 02/09/2011 | 0 | 0 | 0        | 0 | 0 | 0 | 0 | 0        |
| 18/11/2011 | 0 | 0 | 0        | 0 | 0 | 0 | 0 | 0        |
| 30/11/2011 | 0 | 0 | 0        | 0 | 0 | 0 | 0 | 0        |
| 30/12/2011 | 0 | 0 | 0        | 0 | 0 | 0 | 0 | 0        |
| 28/11/2011 | 0 | 0 | 0        | 0 | 0 | 0 | 0 | 0        |
| 23/01/2012 | 0 | 0 | 0        | 0 | 0 | 0 | 0 | 0        |
| 29/06/2012 | 0 | 0 | 0        | 0 | 0 | 0 | 0 | 0        |
| 08/12/2011 | 0 | 0 | 0        | 0 | 0 | 0 | 0 | 0        |
| 07/02/2012 | 0 | 0 | 0        | 0 | 0 | 0 | 0 | 0        |
| 18/06/2012 | 0 | 0 | 0        | 0 | 0 | 0 | 0 | 0        |
| 07/11/2011 | 0 | 0 | 0        | 0 | 0 | 0 | 0 | 0        |

























|            |   |   |   |   |   |   |   |   |
|------------|---|---|---|---|---|---|---|---|
| 19/02/2013 | 0 | 0 | 0 | 0 | 0 | 0 | 0 | 0 |
| 04/03/2013 | 0 | 0 | 0 | 0 | 0 | 0 | 0 | 0 |
| 22/04/2013 | 0 | 0 | 0 | 0 | 0 | 0 | 0 | 0 |
| 29/04/2013 | 0 | 0 | 0 | 0 | 0 | 0 | 0 | 0 |
| 21/05/2013 | 0 | 0 | 0 | 0 | 0 | 0 | 0 | 0 |
| 24/10/2012 | 0 | 0 | 0 | 0 | 0 | 0 | 0 | 0 |
| 24/01/2013 | 0 | 0 | 0 | 0 | 0 | 0 | 0 | 0 |
| 28/02/2013 | 0 | 0 | 0 | 0 | 0 | 0 | 0 | 0 |
| 20/03/2013 | 0 | 0 | 0 | 0 | 0 | 0 | 0 | 0 |
| 19/06/2013 | 0 | 0 | 0 | 0 | 0 | 0 | 0 | 0 |
| 04/04/2013 | 0 | 0 | 0 | 0 | 0 | 0 | 0 | 0 |
| 28/12/2012 | 0 | 0 | 0 | 0 | 0 | 0 | 0 | 0 |
| 27/06/2012 | 0 | 0 | 0 | 0 | 0 | 0 | 0 | 0 |
| 27/07/2012 | 0 | 0 | 0 | 0 | 0 | 0 | 0 | 0 |
| 31/08/2012 | 0 | 0 | 0 | 0 | 0 | 0 | 0 | 0 |
| 02/10/2012 | 0 | 0 | 0 | 0 | 0 | 0 | 0 | 0 |
| 29/10/2012 | 0 | 0 | 0 | 0 | 0 | 0 | 0 | 0 |
| 16/11/2012 | 0 | 0 | 0 | 0 | 0 | 0 | 0 | 0 |
| 28/11/2012 | 0 | 0 | 0 | 0 | 0 | 0 | 0 | 0 |
| 21/01/2013 | 0 | 0 | 0 | 0 | 0 | 0 | 0 | 0 |
| 20/02/2013 | 0 | 0 | 0 | 0 | 0 | 0 | 0 | 0 |
| 06/05/2013 | 0 | 0 | 0 | 0 | 0 | 0 | 0 | 0 |
| 01/07/2013 | 0 | 0 | 0 | 0 | 0 | 0 | 0 | 0 |









|   |   |          |   |   |   |          |   |          |
|---|---|----------|---|---|---|----------|---|----------|
| 0 | 0 | 0        | 0 | 0 | 0 | 0        | 0 | 0        |
| 0 | 0 | 0        | 0 | 0 | 0 | 0        | 0 | 3.29E-05 |
| 0 | 0 | 0        | 0 | 0 | 0 | 0        | 0 | 0        |
| 0 | 0 | 0        | 0 | 0 | 0 | 0        | 0 | 0        |
| 0 | 0 | 0        | 0 | 0 | 0 | 0        | 0 | 0        |
| 0 | 0 | 0        | 0 | 0 | 0 | 0        | 0 | 0        |
| 0 | 0 | 0        | 0 | 0 | 0 | 0        | 0 | 0        |
| 0 | 0 | 0        | 0 | 0 | 0 | 0        | 0 | 0        |
| 0 | 0 | 0        | 0 | 0 | 0 | 0        | 0 | 0        |
| 0 | 0 | 0        | 0 | 0 | 0 | 0        | 0 | 3.29E-05 |
| 0 | 0 | 0        | 0 | 0 | 0 | 0        | 0 | 0        |
| 0 | 0 | 3.29E-05 | 0 | 0 | 0 | 0        | 0 | 0        |
| 0 | 0 | 0        | 0 | 0 | 0 | 0        | 0 | 0        |
| 0 | 0 | 0        | 0 | 0 | 0 | 0        | 0 | 0        |
| 0 | 0 | 0        | 0 | 0 | 0 | 0        | 0 | 0        |
| 0 | 0 | 0        | 0 | 0 | 0 | 0        | 0 | 0        |
| 0 | 0 | 0        | 0 | 0 | 0 | 0        | 0 | 0        |
| 0 | 0 | 0        | 0 | 0 | 0 | 0        | 0 | 0.435353 |
| 0 | 0 | 0        | 0 | 0 | 0 | 0        | 0 | 0.013939 |
| 0 | 0 | 0        | 0 | 0 | 0 | 0        | 0 | 0.061146 |
| 0 | 0 | 0        | 0 | 0 | 0 | 0        | 0 | 0.092278 |
| 0 | 0 | 0        | 0 | 0 | 0 | 0        | 0 | 0.393997 |
| 0 | 0 | 0        | 0 | 0 | 0 | 0        | 0 | 0.061606 |
| 0 | 0 | 0        | 0 | 0 | 0 | 3.29E-05 | 0 | 0.177751 |
| 0 | 0 | 0        | 0 | 0 | 0 | 0        | 0 | 0        |
| 0 | 0 | 0        | 0 | 0 | 0 | 0        | 0 | 0        |
| 0 | 0 | 0        | 0 | 0 | 0 | 0        | 0 | 0        |
| 0 | 0 | 0        | 0 | 0 | 0 | 0        | 0 | 9.86E-05 |
| 0 | 0 | 0        | 0 | 0 | 0 | 0        | 0 | 0.001512 |
| 0 | 0 | 0        | 0 | 0 | 0 | 0        | 0 | 0.00046  |
| 0 | 0 | 0        | 0 | 0 | 0 | 0        | 0 | 0        |
| 0 | 0 | 0        | 0 | 0 | 0 | 0        | 0 | 0        |
| 0 | 0 | 0        | 0 | 0 | 0 | 0        | 0 | 0.000263 |
| 0 | 0 | 0        | 0 | 0 | 0 | 0        | 0 | 0        |
| 0 | 0 | 0        | 0 | 0 | 0 | 0        | 0 | 0        |
| 0 | 0 | 0        | 0 | 0 | 0 | 0        | 0 | 0        |
| 0 | 0 | 0        | 0 | 0 | 0 | 0        | 0 | 0        |
| 0 | 0 | 3.29E-05 | 0 | 0 | 0 | 0        | 0 | 0        |
| 0 | 0 | 0        | 0 | 0 | 0 | 0        | 0 | 0        |
| 0 | 0 | 0        | 0 | 0 | 0 | 0        | 0 | 0        |
| 0 | 0 | 0        | 0 | 0 | 0 | 0        | 0 | 0        |
| 0 | 0 | 9.86E-05 | 0 | 0 | 0 | 0        | 0 | 6.57E-05 |
| 0 | 0 | 0        | 0 | 0 | 0 | 0        | 0 | 0        |
| 0 | 0 | 0        | 0 | 0 | 0 | 0        | 0 | 6.57E-05 |
| 0 | 0 | 0        | 0 | 0 | 0 | 0        | 0 | 0        |
| 0 | 0 | 0        | 0 | 0 | 0 | 0        | 0 | 0        |
| 0 | 0 | 0        | 0 | 0 | 0 | 0        | 0 | 9.86E-05 |
| 0 | 0 | 6.57E-05 | 0 | 0 | 0 | 0        | 0 | 0        |



















| k_Bacteri |
|-----------|-----------|-----------|-----------|-----------|-----------|-----------|-----------|-----------|
| 0         | 0         | 0.003912  | 0         | 0         | 0         | 0         | 0         | 0         |
| 0         | 0         | 0.004175  | 0         | 0         | 0         | 0         | 0         | 0         |
| 0         | 0         | 0.01075   | 0         | 0         | 0         | 0         | 0         | 0         |
| 0         | 0         | 0.005753  | 0         | 0         | 0         | 0         | 0         | 0         |
| 0         | 0         | 0.025872  | 0         | 0         | 0.000263  | 0         | 0         | 0         |
| 0         | 0         | 0.000756  | 0         | 0         | 0         | 0         | 0         | 0         |
| 0         | 0         | 0.003912  | 0         | 0         | 0         | 0         | 0         | 0         |
| 0         | 0         | 0.000493  | 0         | 0         | 0         | 0         | 0         | 0         |
| 0         | 0         | 0.003518  | 0         | 0         | 0         | 0         | 0         | 0         |
| 0         | 0         | 0.001446  | 0         | 0         | 0         | 0         | 0         | 0         |
| 0         | 0         | 0.00046   | 0         | 0         | 0         | 0         | 0         | 0         |
| 0         | 0         | 0.003978  | 0         | 0         | 0         | 0         | 0         | 0         |
| 0         | 0         | 0.00526   | 0         | 0         | 0         | 0         | 0         | 0         |
| 0         | 0         | 0.002466  | 0         | 0         | 0         | 0         | 0         | 0         |
| 0         | 0         | 0.000263  | 0         | 0         | 0         | 0         | 0         | 0         |
| 0         | 0         | 9.86E-05  | 0         | 0         | 0         | 0         | 0         | 0         |
| 0         | 0         | 0         | 0         | 0         | 0         | 0         | 0         | 0         |
| 0         | 0         | 0         | 0         | 0         | 0         | 0         | 0         | 0         |
| 0         | 0         | 0.000197  | 0         | 0         | 0         | 0         | 0         | 0         |
| 0         | 0         | 0.000164  | 0         | 0         | 0         | 0         | 0         | 0         |
| 0         | 0         | 0.001808  | 0         | 0         | 0         | 0         | 0         | 0         |
| 0         | 0         | 0.033926  | 0         | 0         | 0         | 0         | 0         | 0         |
| 0         | 0         | 0.018541  | 0         | 0         | 0         | 0         | 0         | 0         |
| 0         | 0         | 0.02699   | 0         | 0         | 0         | 0         | 0         | 0         |
| 0         | 0         | 0.019133  | 0         | 0         | 0         | 0         | 0         | 0         |
| 0         | 0         | 0.002367  | 0         | 0         | 0         | 0         | 0         | 0         |
| 0         | 0         | 0.004044  | 0         | 0         | 0         | 0         | 0         | 0         |
| 3.29E-05  | 0         | 0.024393  | 0         | 0         | 0         | 0         | 0         | 0         |
| 0         | 0         | 0.026562  | 0         | 0         | 0         | 0         | 0         | 0         |
| 0         | 0         | 0.018311  | 0         | 0         | 0         | 0         | 0         | 0         |
| 0         | 0         | 0.040008  | 0         | 0         | 0         | 0         | 0         | 0         |
| 0         | 0         | 0.021105  | 0         | 0         | 0         | 0         | 0         | 0         |
| 0         | 0         | 0.073342  | 0         | 0         | 0         | 0         | 0         | 0         |
| 0.000164  | 0         | 0.00766   | 0         | 0         | 0         | 0         | 0         | 0         |
| 0         | 0         | 0.031756  | 0         | 0         | 0         | 0         | 0         | 0         |
| 0         | 0         | 0.022091  | 0         | 0         | 0         | 0         | 0         | 0         |
| 0.00023   | 0         | 0.018968  | 0         | 0         | 0         | 0         | 0         | 0         |
| 0         | 0         | 0.005556  | 0         | 0         | 0         | 0         | 0         | 0         |
| 0.000131  | 0         | 0.007298  | 0         | 0         | 0         | 0         | 0         | 0         |
| 0.000197  | 0         | 0.01841   | 0         | 0         | 0         | 0         | 0         | 0         |
| 3.29E-05  | 0         | 0.008317  | 0         | 0         | 0         | 0         | 0         | 0         |
| 0         | 0         | 0.003156  | 0         | 0         | 0         | 0         | 0         | 0         |
| 0.000164  | 0         | 0.018081  | 0         | 0         | 0         | 0         | 0         | 0         |
| 0         | 0         | 6.57E-05  | 0         | 0         | 0         | 0         | 0         | 0         |



|          |   |          |   |   |   |   |          |   |
|----------|---|----------|---|---|---|---|----------|---|
| 0        | 0 | 0.013314 | 0 | 0 | 0 | 0 | 0        | 0 |
| 0        | 0 | 0.020678 | 0 | 0 | 0 | 0 | 0        | 0 |
| 0        | 0 | 0.0119   | 0 | 0 | 0 | 0 | 0        | 0 |
| 0        | 0 | 0.037575 | 0 | 0 | 0 | 0 | 0        | 0 |
| 0        | 0 | 0.038627 | 0 | 0 | 0 | 0 | 0        | 0 |
| 0        | 0 | 0.001512 | 0 | 0 | 0 | 0 | 0        | 0 |
| 0        | 0 | 0.006805 | 0 | 0 | 0 | 0 | 0        | 0 |
| 0        | 0 | 0.002597 | 0 | 0 | 0 | 0 | 0        | 0 |
| 0        | 0 | 0.0167   | 0 | 0 | 0 | 0 | 0        | 0 |
| 0        | 0 | 0.025149 | 0 | 0 | 0 | 0 | 0        | 0 |
| 0        | 0 | 0.01453  | 0 | 0 | 0 | 0 | 0        | 0 |
| 0        | 0 | 0.010553 | 0 | 0 | 0 | 0 | 0        | 0 |
| 0        | 0 | 0.009271 | 0 | 0 | 0 | 0 | 0        | 0 |
| 0        | 0 | 0.009008 | 0 | 0 | 0 | 0 | 0        | 0 |
| 0.000131 | 0 | 0.002005 | 0 | 0 | 0 | 0 | 0        | 0 |
| 0        | 0 | 0.010257 | 0 | 0 | 0 | 0 | 0        | 0 |
| 0        | 0 | 0.00092  | 0 | 0 | 0 | 0 | 0        | 0 |
| 0        | 0 | 0.002794 | 0 | 0 | 0 | 0 | 0        | 0 |
| 0        | 0 | 0.00332  | 0 | 0 | 0 | 0 | 0        | 0 |
| 0        | 0 | 0.014662 | 0 | 0 | 0 | 0 | 0        | 0 |
| 0        | 0 | 0.003978 | 0 | 0 | 0 | 0 | 0        | 0 |
| 0        | 0 | 0.00069  | 0 | 0 | 0 | 0 | 0        | 0 |
| 0        | 0 | 0.005753 | 0 | 0 | 0 | 0 | 0        | 0 |
| 0        | 0 | 0.004307 | 0 | 0 | 0 | 0 | 0        | 0 |
| 3.29E-05 | 0 | 0.002498 | 0 | 0 | 0 | 0 | 0        | 0 |
| 0        | 0 | 0.000723 | 0 | 0 | 0 | 0 | 0        | 0 |
| 6.57E-05 | 0 | 0.003386 | 0 | 0 | 0 | 0 | 0        | 0 |
| 0        | 0 | 0.000131 | 0 | 0 | 0 | 0 | 0        | 0 |
| 3.29E-05 | 0 | 0.001709 | 0 | 0 | 0 | 0 | 0        | 0 |
| 0        | 0 | 0.001644 | 0 | 0 | 0 | 0 | 3.29E-05 | 0 |
| 0        | 0 | 0.009961 | 0 | 0 | 0 | 0 | 0        | 0 |
| 0        | 0 | 0.009764 | 0 | 0 | 0 | 0 | 0        | 0 |
| 0        | 0 | 0.007923 | 0 | 0 | 0 | 0 | 0        | 0 |
| 0        | 0 | 0.001808 | 0 | 0 | 0 | 0 | 0        | 0 |
| 0        | 0 | 0.008613 | 0 | 0 | 0 | 0 | 0        | 0 |
| 6.57E-05 | 0 | 0.010322 | 0 | 0 | 0 | 0 | 0        | 0 |
| 0        | 0 | 0.004997 | 0 | 0 | 0 | 0 | 0        | 0 |
| 0        | 0 | 0.000592 | 0 | 0 | 0 | 0 | 0        | 0 |
| 0        | 0 | 0.009566 | 0 | 0 | 0 | 0 | 0        | 0 |
| 0        | 0 | 0.009566 | 0 | 0 | 0 | 0 | 0        | 0 |
| 0        | 0 | 0.025445 | 0 | 0 | 0 | 0 | 0        | 0 |
| 0        | 0 | 0.022256 | 0 | 0 | 0 | 0 | 0        | 0 |
| 0        | 0 | 0.032381 | 0 | 0 | 0 | 0 | 0        | 0 |
| 0        | 0 | 0.000888 | 0 | 0 | 0 | 0 | 0        | 0 |
| 0        | 0 | 0.001611 | 0 | 0 | 0 | 0 | 0        | 0 |
| 0        | 0 | 0.010125 | 0 | 0 | 0 | 0 | 0        | 0 |
| 0        | 0 | 0.040632 | 0 | 0 | 0 | 0 | 0        | 0 |

|          |          |          |   |   |   |   |          |   |
|----------|----------|----------|---|---|---|---|----------|---|
| 0        | 0        | 0.03054  | 0 | 0 | 0 | 0 | 0        | 0 |
| 0        | 0        | 0.028798 | 0 | 0 | 0 | 0 | 0        | 0 |
| 0        | 0        | 0.039449 | 0 | 0 | 0 | 0 | 0        | 0 |
| 0        | 0        | 0.017325 | 0 | 0 | 0 | 0 | 0        | 0 |
| 0        | 0        | 0.060752 | 0 | 0 | 0 | 0 | 0        | 0 |
| 0        | 0        | 0.000131 | 0 | 0 | 0 | 0 | 0        | 0 |
| 0        | 0        | 0        | 0 | 0 | 0 | 0 | 0        | 0 |
| 0        | 0        | 0.0024   | 0 | 0 | 0 | 0 | 0        | 0 |
| 0        | 0        | 0.001381 | 0 | 0 | 0 | 0 | 0        | 0 |
| 0        | 0        | 0.015286 | 0 | 0 | 0 | 0 | 0        | 0 |
| 0        | 0        | 0.007495 | 0 | 0 | 0 | 0 | 0        | 0 |
| 0        | 0        | 0.004537 | 0 | 0 | 0 | 0 | 0        | 0 |
| 7.02E-05 | 0        | 0.001124 | 0 | 0 | 0 | 0 | 0        | 0 |
| 0        | 0        | 0.004997 | 0 | 0 | 0 | 0 | 0        | 0 |
| 0        | 0        | 0.000789 | 0 | 0 | 0 | 0 | 0        | 0 |
| 0        | 0        | 0.000625 | 0 | 0 | 0 | 0 | 0        | 0 |
| 0        | 0        | 9.86E-05 | 0 | 0 | 0 | 0 | 0        | 0 |
| 0        | 0        | 0.001841 | 0 | 0 | 0 | 0 | 0        | 0 |
| 0        | 0        | 6.57E-05 | 0 | 0 | 0 | 0 | 0        | 0 |
| 0        | 0        | 0.000855 | 0 | 0 | 0 | 0 | 0        | 0 |
| 0        | 0        | 0.009566 | 0 | 0 | 0 | 0 | 9.86E-05 | 0 |
| 0        | 0        | 0.01075  | 0 | 0 | 0 | 0 | 0        | 0 |
| 0        | 0        | 0.003419 | 0 | 0 | 0 | 0 | 0        | 0 |
| 0        | 0        | 0.011736 | 0 | 0 | 0 | 0 | 0        | 0 |
| 0.000164 | 0        | 0.008021 | 0 | 0 | 0 | 0 | 0        | 0 |
| 0        | 0        | 0.01292  | 0 | 0 | 0 | 0 | 0        | 0 |
| 0        | 0        | 0.005095 | 0 | 0 | 0 | 0 | 0        | 0 |
| 0        | 0        | 0.043032 | 0 | 0 | 0 | 0 | 0        | 0 |
| 0        | 0        | 0.000986 | 0 | 0 | 0 | 0 | 0        | 0 |
| 0        | 0        | 0.002235 | 0 | 0 | 0 | 0 | 0        | 0 |
| 0        | 0        | 0.001841 | 0 | 0 | 0 | 0 | 0        | 0 |
| 0        | 0        | 0.024623 | 0 | 0 | 0 | 0 | 0        | 0 |
| 0        | 0        | 0.000263 | 0 | 0 | 0 | 0 | 0        | 0 |
| 0.000131 | 0        | 0.028075 | 0 | 0 | 0 | 0 | 0        | 0 |
| 3.29E-05 | 0        | 0.023012 | 0 | 0 | 0 | 0 | 0        | 0 |
| 0        | 0        | 0.01052  | 0 | 0 | 0 | 0 | 0        | 0 |
| 0        | 0        | 0.002137 | 0 | 0 | 0 | 0 | 0        | 0 |
| 6.57E-05 | 0        | 0.004208 | 0 | 0 | 0 | 0 | 0        | 0 |
| 0        | 0        | 0.017325 | 0 | 0 | 0 | 0 | 0        | 0 |
| 9.86E-05 | 0        | 0.014202 | 0 | 0 | 0 | 0 | 0        | 0 |
| 0.000592 | 0.000263 | 0.009303 | 0 | 0 | 0 | 0 | 0        | 0 |
| 0.000197 | 0        | 0.009172 | 0 | 0 | 0 | 0 | 0        | 0 |
| 0        | 0        | 0.000986 | 0 | 0 | 0 | 0 | 0        | 0 |
| 3.29E-05 | 0        | 0.013347 | 0 | 0 | 0 | 0 | 0        | 0 |
| 9.86E-05 | 0        | 0.019856 | 0 | 0 | 0 | 0 | 0        | 0 |
| 9.86E-05 | 0        | 0.01453  | 0 | 0 | 0 | 0 | 0        | 0 |
| 6.57E-05 | 0        | 0.016437 | 0 | 0 | 0 | 0 | 0        | 0 |

|          |   |          |          |   |   |          |   |   |
|----------|---|----------|----------|---|---|----------|---|---|
| 9.86E-05 | 0 | 0.008251 | 0        | 0 | 0 | 0        | 0 | 0 |
| 0        | 0 | 0.010125 | 0        | 0 | 0 | 0        | 0 | 0 |
| 0        | 0 | 0.018147 | 0        | 0 | 0 | 0        | 0 | 0 |
| 0        | 0 | 0.008876 | 0        | 0 | 0 | 0        | 0 | 0 |
| 0        | 0 | 0.001841 | 0        | 0 | 0 | 0        | 0 | 0 |
| 0        | 0 | 0.002959 | 0        | 0 | 0 | 0        | 0 | 0 |
| 0        | 0 | 0.005227 | 0        | 0 | 0 | 0        | 0 | 0 |
| 0        | 0 | 0.003386 | 0        | 0 | 0 | 0        | 0 | 0 |
| 0        | 0 | 0.005556 | 0        | 0 | 0 | 0        | 0 | 0 |
| 0        | 0 | 0.008679 | 0        | 0 | 0 | 0        | 0 | 0 |
| 0        | 0 | 0.014465 | 0        | 0 | 0 | 0        | 0 | 0 |
| 0        | 0 | 0.002663 | 0        | 0 | 0 | 0        | 0 | 0 |
| 0        | 0 | 0.006246 | 0        | 0 | 0 | 0        | 0 | 0 |
| 0        | 0 | 0.007956 | 0        | 0 | 0 | 0        | 0 | 0 |
| 0        | 0 | 0.004438 | 0        | 0 | 0 | 0        | 0 | 0 |
| 0        | 0 | 0.002498 | 0        | 0 | 0 | 0        | 0 | 0 |
| 0        | 0 | 0.001677 | 0        | 0 | 0 | 0        | 0 | 0 |
| 0        | 0 | 0.001085 | 0        | 0 | 0 | 0        | 0 | 0 |
| 0        | 0 | 0.000986 | 0        | 0 | 0 | 0        | 0 | 0 |
| 3.29E-05 | 0 | 0.012952 | 0        | 0 | 0 | 0        | 0 | 0 |
| 0        | 0 | 0.019231 | 0        | 0 | 0 | 0        | 0 | 0 |
| 0        | 0 | 0.003682 | 0        | 0 | 0 | 0        | 0 | 0 |
| 0        | 0 | 0.017818 | 0        | 0 | 0 | 0        | 0 | 0 |
| 0        | 0 | 0.026694 | 0        | 0 | 0 | 0        | 0 | 0 |
| 0        | 0 | 0.009764 | 0        | 0 | 0 | 0        | 0 | 0 |
| 0        | 0 | 0.007068 | 0        | 0 | 0 | 0        | 0 | 0 |
| 0        | 0 | 0.011276 | 0        | 0 | 0 | 0        | 0 | 0 |
| 0        | 0 | 0.008909 | 0        | 0 | 0 | 0        | 0 | 0 |
| 0        | 0 | 0.019231 | 0        | 0 | 0 | 0        | 0 | 0 |
| 0        | 0 | 0.007528 | 0        | 0 | 0 | 0        | 0 | 0 |
| 0        | 0 | 0.004339 | 0        | 0 | 0 | 0        | 0 | 0 |
| 0        | 0 | 0.01029  | 0        | 0 | 0 | 0        | 0 | 0 |
| 0.000131 | 0 | 0.007199 | 0        | 0 | 0 | 0        | 0 | 0 |
| 0        | 0 | 0.020218 | 0        | 0 | 0 | 0        | 0 | 0 |
| 0        | 0 | 0.010848 | 0        | 0 | 0 | 0        | 0 | 0 |
| 0        | 0 | 0.010783 | 0        | 0 | 0 | 0        | 0 | 0 |
| 0        | 0 | 0.008745 | 0        | 0 | 0 | 0        | 0 | 0 |
| 0.000164 | 0 | 0.018048 | 0        | 0 | 0 | 0.000131 | 0 | 0 |
| 0.001841 | 0 | 0.013084 | 0        | 0 | 0 | 0        | 0 | 0 |
| 0        | 0 | 0.002433 | 0        | 0 | 0 | 0        | 0 | 0 |
| 0.00023  | 0 | 0.002268 | 0        | 0 | 0 | 0        | 0 | 0 |
| 0        | 0 | 0.00355  | 0        | 0 | 0 | 0        | 0 | 0 |
| 0        | 0 | 0.00835  | 0        | 0 | 0 | 0        | 0 | 0 |
| 0        | 0 | 0.018344 | 3.29E-05 | 0 | 0 | 0        | 0 | 0 |
| 0        | 0 | 0.017851 | 0        | 0 | 0 | 0        | 0 | 0 |
| 0        | 0 | 0.000131 | 0        | 0 | 0 | 0        | 0 | 0 |
| 0        | 0 | 9.86E-05 | 0        | 0 | 0 | 0        | 0 | 0 |

|          |   |          |   |   |   |   |          |   |
|----------|---|----------|---|---|---|---|----------|---|
| 0        | 0 | 0.000164 | 0 | 0 | 0 | 0 | 0        | 0 |
| 0        | 0 | 0        | 0 | 0 | 0 | 0 | 0        | 0 |
| 0        | 0 | 0.001808 | 0 | 0 | 0 | 0 | 0        | 0 |
| 0        | 0 | 0        | 0 | 0 | 0 | 0 | 0        | 0 |
| 0        | 0 | 0.000131 | 0 | 0 | 0 | 0 | 0        | 0 |
| 6.57E-05 | 0 | 0.010257 | 0 | 0 | 0 | 0 | 0        | 0 |
| 3.29E-05 | 0 | 0.009073 | 0 | 0 | 0 | 0 | 0        | 0 |
| 3.29E-05 | 0 | 0.046911 | 0 | 0 | 0 | 0 | 0        | 0 |
| 9.86E-05 | 0 | 0.010816 | 0 | 0 | 0 | 0 | 0        | 0 |
| 0.000131 | 0 | 0.004274 | 0 | 0 | 0 | 0 | 0        | 0 |
| 6.57E-05 | 0 | 0.00263  | 0 | 0 | 0 | 0 | 0        | 0 |
| 6.57E-05 | 0 | 0.003255 | 0 | 0 | 0 | 0 | 0        | 0 |
| 0        | 0 | 0.000329 | 0 | 0 | 0 | 0 | 0        | 0 |
| 9.86E-05 | 0 | 0.009501 | 0 | 0 | 0 | 0 | 0        | 0 |
| 0.000526 | 0 | 0.010454 | 0 | 0 | 0 | 0 | 0        | 0 |
| 0        | 0 | 0.001742 | 0 | 0 | 0 | 0 | 0        | 0 |
| 0        | 0 | 0.002729 | 0 | 0 | 0 | 0 | 0        | 0 |
| 0        | 0 | 0.000296 | 0 | 0 | 0 | 0 | 0        | 0 |
| 0        | 0 | 0.001183 | 0 | 0 | 0 | 0 | 0        | 0 |
| 0        | 0 | 0.001085 | 0 | 0 | 0 | 0 | 0        | 0 |
| 0        | 0 | 0.006016 | 0 | 0 | 0 | 0 | 0        | 0 |
| 0        | 0 | 0.007134 | 0 | 0 | 0 | 0 | 0.000131 | 0 |
| 0        | 0 | 0.000888 | 0 | 0 | 0 | 0 | 0        | 0 |
| 0        | 0 | 0.000493 | 0 | 0 | 0 | 0 | 0        | 0 |
| 0        | 0 | 0.002268 | 0 | 0 | 0 | 0 | 0        | 0 |
| 0.000329 | 0 | 0.018442 | 0 | 0 | 0 | 0 | 0        | 0 |
| 0.001446 | 0 | 0.00766  | 0 | 0 | 0 | 0 | 0        | 0 |
| 6.57E-05 | 0 | 0.00766  | 0 | 0 | 0 | 0 | 0        | 0 |
| 6.57E-05 | 0 | 0.015286 | 0 | 0 | 0 | 0 | 0        | 0 |
| 0        | 0 | 0.021565 | 0 | 0 | 0 | 0 | 0        | 0 |
| 9.86E-05 | 0 | 0.006476 | 0 | 0 | 0 | 0 | 0        | 0 |
| 0        | 0 | 0.000394 | 0 | 0 | 0 | 0 | 0        | 0 |
| 0        | 0 | 6.57E-05 | 0 | 0 | 0 | 0 | 0        | 0 |
| 0        | 0 | 0.001019 | 0 | 0 | 0 | 0 | 0        | 0 |
| 0        | 0 | 0.011111 | 0 | 0 | 0 | 0 | 0        | 0 |
| 0        | 0 | 0.005095 | 0 | 0 | 0 | 0 | 0        | 0 |
| 0        | 0 | 0.016667 | 0 | 0 | 0 | 0 | 0        | 0 |
| 0        | 0 | 0.018541 | 0 | 0 | 0 | 0 | 0        | 0 |
| 0        | 0 | 0.012229 | 0 | 0 | 0 | 0 | 0        | 0 |
| 3.29E-05 | 0 | 0.009829 | 0 | 0 | 0 | 0 | 0        | 0 |
| 3.29E-05 | 0 | 0.016207 | 0 | 0 | 0 | 0 | 0        | 0 |
| 0        | 0 | 0.000756 | 0 | 0 | 0 | 0 | 0        | 0 |
| 0.000131 | 0 | 0.014596 | 0 | 0 | 0 | 0 | 0        | 0 |
| 6.57E-05 | 0 | 0.020875 | 0 | 0 | 0 | 0 | 0        | 0 |
| 0        | 0 | 0.02242  | 0 | 0 | 0 | 0 | 0        | 0 |
| 0        | 0 | 0.01098  | 0 | 0 | 0 | 0 | 0        | 0 |
| 0        | 0 | 0.029422 | 0 | 0 | 0 | 0 | 6.57E-05 | 0 |

|          |   |          |   |   |   |   |          |   |
|----------|---|----------|---|---|---|---|----------|---|
| 0        | 0 | 0.051481 | 0 | 0 | 0 | 0 | 0        | 0 |
| 0        | 0 | 0.006476 | 0 | 0 | 0 | 0 | 0        | 0 |
| 0        | 0 | 0.021434 | 0 | 0 | 0 | 0 | 0        | 0 |
| 0        | 0 | 9.86E-05 | 0 | 0 | 0 | 0 | 0        | 0 |
| 0        | 0 | 0.0024   | 0 | 0 | 0 | 0 | 0.001841 | 0 |
| 0        | 0 | 0.001972 | 0 | 0 | 0 | 0 | 0.00023  | 0 |
| 0        | 0 | 0.008843 | 0 | 0 | 0 | 0 | 3.29E-05 | 0 |
| 0        | 0 | 0.000362 | 0 | 0 | 0 | 0 | 0        | 0 |
| 0        | 0 | 0.003616 | 0 | 0 | 0 | 0 | 0        | 0 |
| 0        | 0 | 0.004076 | 0 | 0 | 0 | 0 | 0        | 0 |
| 0        | 0 | 0.002137 | 0 | 0 | 0 | 0 | 0.000657 | 0 |
| 0        | 0 | 0.003287 | 0 | 0 | 0 | 0 | 3.29E-05 | 0 |
| 0        | 0 | 0.001446 | 0 | 0 | 0 | 0 | 6.57E-05 | 0 |
| 0        | 0 | 0.002926 | 0 | 0 | 0 | 0 | 0.000329 | 0 |
| 0.000329 | 0 | 0.013347 | 0 | 0 | 0 | 0 | 0        | 0 |
| 3.29E-05 | 0 | 0.012952 | 0 | 0 | 0 | 0 | 0        | 0 |
| 6.57E-05 | 0 | 0.014629 | 0 | 0 | 0 | 0 | 0        | 0 |
| 0        | 0 | 0.004307 | 0 | 0 | 0 | 0 | 0        | 0 |
| 6.57E-05 | 0 | 0.010816 | 0 | 0 | 0 | 0 | 0        | 0 |
| 0.000197 | 0 | 0.017785 | 0 | 0 | 0 | 0 | 0        | 0 |
| 0        | 0 | 0.014793 | 0 | 0 | 0 | 0 | 0        | 0 |
| 3.29E-05 | 0 | 0.00618  | 0 | 0 | 0 | 0 | 0        | 0 |
| 0.000164 | 0 | 0.005194 | 0 | 0 | 0 | 0 | 0        | 0 |
| 0        | 0 | 0.003781 | 0 | 0 | 0 | 0 | 0        | 0 |
| 0        | 0 | 0.000296 | 0 | 0 | 0 | 0 | 0        | 0 |
| 0        | 0 | 0.001085 | 0 | 0 | 0 | 0 | 0        | 0 |
| 0        | 0 | 0.00023  | 0 | 0 | 0 | 0 | 0        | 0 |
| 0        | 0 | 0.000197 | 0 | 0 | 0 | 0 | 0        | 0 |
| 0        | 0 | 0.001151 | 0 | 0 | 0 | 0 | 0        | 0 |
| 0        | 0 | 0        | 0 | 0 | 0 | 0 | 0        | 0 |
| 0        | 0 | 0.00023  | 0 | 0 | 0 | 0 | 0        | 0 |
| 0        | 0 | 0.000164 | 0 | 0 | 0 | 0 | 0        | 0 |
| 9.86E-05 | 0 | 0.002268 | 0 | 0 | 0 | 0 | 0        | 0 |
| 0        | 0 | 0.004076 | 0 | 0 | 0 | 0 | 0        | 0 |
| 0.000296 | 0 | 0.020251 | 0 | 0 | 0 | 0 | 0        | 0 |
| 0.000329 | 0 | 0.013248 | 0 | 0 | 0 | 0 | 0        | 0 |
| 0.00069  | 0 | 0.005852 | 0 | 0 | 0 | 0 | 0        | 0 |
| 0.000329 | 0 | 0.006213 | 0 | 0 | 0 | 0 | 0        | 0 |
| 0        | 0 | 0.007167 | 0 | 0 | 0 | 0 | 0        | 0 |
| 0.000296 | 0 | 0.048424 | 0 | 0 | 0 | 0 | 0        | 0 |
| 0.00023  | 0 | 0.004668 | 0 | 0 | 0 | 0 | 0        | 0 |
| 0.000953 | 0 | 0.01647  | 0 | 0 | 0 | 0 | 0        | 0 |
| 0        | 0 | 0.007857 | 0 | 0 | 0 | 0 | 0        | 0 |
| 0        | 0 | 0.001611 | 0 | 0 | 0 | 0 | 3.29E-05 | 0 |
| 0        | 0 | 0.00092  | 0 | 0 | 0 | 0 | 0        | 0 |
| 0        | 0 | 0.003715 | 0 | 0 | 0 | 0 | 9.86E-05 | 0 |
| 0        | 0 | 0.000723 | 0 | 0 | 0 | 0 | 0        | 0 |

|          |   |          |   |   |          |   |          |          |
|----------|---|----------|---|---|----------|---|----------|----------|
| 6.57E-05 | 0 | 0.013248 | 0 | 0 | 0        | 0 | 0        | 0        |
| 6.57E-05 | 0 | 0.005424 | 0 | 0 | 0        | 0 | 0        | 0        |
| 0        | 0 | 0.007134 | 0 | 0 | 0        | 0 | 0        | 0        |
| 0        | 0 | 0.028962 | 0 | 0 | 0        | 0 | 0        | 0        |
| 0        | 0 | 0.015122 | 0 | 0 | 0        | 0 | 0        | 0        |
| 0        | 0 | 0.022979 | 0 | 0 | 0        | 0 | 0        | 0        |
| 0        | 0 | 0.008482 | 0 | 0 | 3.29E-05 | 0 | 0        | 0        |
| 0        | 0 | 0.013117 | 0 | 0 | 0        | 0 | 0        | 0        |
| 0        | 0 | 0.00194  | 0 | 0 | 0        | 0 | 0        | 0        |
| 0        | 0 | 0.011868 | 0 | 0 | 0        | 0 | 6.57E-05 | 0        |
| 0        | 0 | 0.001348 | 0 | 0 | 0        | 0 | 0        | 0        |
| 0        | 0 | 0.010388 | 0 | 0 | 0        | 0 | 0        | 0        |
| 0        | 0 | 0.009928 | 0 | 0 | 0        | 0 | 0        | 0        |
| 0        | 0 | 0.0024   | 0 | 0 | 3.29E-05 | 0 | 0        | 0        |
| 0        | 0 | 0.004668 | 0 | 0 | 0        | 0 | 0        | 0        |
| 0        | 0 | 0.005556 | 0 | 0 | 0        | 0 | 0        | 0        |
| 0        | 0 | 0.000362 | 0 | 0 | 0        | 0 | 0        | 0        |
| 0        | 0 | 0.001183 | 0 | 0 | 0        | 0 | 0        | 0        |
| 0        | 0 | 0.000789 | 0 | 0 | 0        | 0 | 0        | 0        |
| 0        | 0 | 0.001151 | 0 | 0 | 0        | 0 | 0        | 0        |
| 0        | 0 | 0.000164 | 0 | 0 | 0        | 0 | 0        | 0        |
| 0        | 0 | 0.000888 | 0 | 0 | 0        | 0 | 0        | 0        |
| 0        | 0 | 0.005424 | 0 | 0 | 0        | 0 | 0        | 0        |
| 0        | 0 | 0.000986 | 0 | 0 | 0        | 0 | 0        | 0        |
| 0        | 0 | 0.000164 | 0 | 0 | 0        | 0 | 0        | 0        |
| 0        | 0 | 6.57E-05 | 0 | 0 | 0        | 0 | 0        | 0        |
| 0        | 0 | 9.86E-05 | 0 | 0 | 0        | 0 | 0        | 0        |
| 0        | 0 | 0.001282 | 0 | 0 | 0        | 0 | 0        | 0        |
| 3.29E-05 | 0 | 0.013347 | 0 | 0 | 0        | 0 | 0        | 0        |
| 6.57E-05 | 0 | 0.002235 | 0 | 0 | 0        | 0 | 0        | 0        |
| 0        | 0 | 0.001249 | 0 | 0 | 0        | 0 | 0        | 0        |
| 0        | 0 | 0.000197 | 0 | 0 | 0        | 0 | 0        | 0        |
| 0        | 0 | 0.017456 | 0 | 0 | 0        | 0 | 0        | 0        |
| 0        | 0 | 0.012394 | 0 | 0 | 0        | 0 | 0        | 0        |
| 0        | 0 | 0.003222 | 0 | 0 | 0        | 0 | 0        | 0        |
| 0        | 0 | 0.001085 | 0 | 0 | 0        | 0 | 0        | 0        |
| 0        | 0 | 0.00457  | 0 | 0 | 0        | 0 | 0        | 0        |
| 0        | 0 | 0.001479 | 0 | 0 | 0        | 0 | 0        | 0        |
| 0        | 0 | 0.006838 | 0 | 0 | 0        | 0 | 0        | 0        |
| 0        | 0 | 0.002301 | 0 | 0 | 0        | 0 | 0        | 0        |
| 0        | 0 | 0.00217  | 0 | 0 | 0        | 0 | 0        | 0        |
| 0        | 0 | 0.004833 | 0 | 0 | 0        | 0 | 0        | 0        |
| 0        | 0 | 0.00217  | 0 | 0 | 0        | 0 | 0        | 0        |
| 0        | 0 | 0.004241 | 0 | 0 | 0        | 0 | 0        | 6.57E-05 |
| 6.57E-05 | 0 | 0.01029  | 0 | 0 | 0        | 0 | 0        | 0        |
| 0        | 0 | 0.008153 | 0 | 0 | 0        | 0 | 0        | 0        |
| 0.000657 | 0 | 0.007923 | 0 | 0 | 0        | 0 | 0        | 0        |

|          |   |          |   |   |          |   |          |   |
|----------|---|----------|---|---|----------|---|----------|---|
| 6.57E-05 | 0 | 0.03271  | 0 | 0 | 0        | 0 | 0        | 0 |
| 0.00023  | 0 | 0.012887 | 0 | 0 | 0        | 0 | 0        | 0 |
| 3.29E-05 | 0 | 0.003715 | 0 | 0 | 0        | 0 | 0        | 0 |
| 0        | 0 | 0.024689 | 0 | 0 | 0        | 0 | 0        | 0 |
| 0        | 0 | 0.025346 | 0 | 0 | 0        | 0 | 0        | 0 |
| 0        | 0 | 0.015319 | 0 | 0 | 0        | 0 | 0        | 0 |
| 0        | 0 | 0.014103 | 0 | 0 | 0        | 0 | 0        | 0 |
| 0        | 0 | 0.010684 | 0 | 0 | 0        | 0 | 0        | 0 |
| 0        | 0 | 0.026529 | 0 | 0 | 0        | 0 | 0        | 0 |
| 0        | 0 | 0.015517 | 0 | 0 | 0        | 0 | 0        | 0 |
| 0        | 0 | 0.054834 | 0 | 0 | 0        | 0 | 0        | 0 |
| 0        | 0 | 0.000855 | 0 | 0 | 0        | 0 | 0        | 0 |
| 0        | 0 | 0.026003 | 0 | 0 | 0        | 0 | 0        | 0 |
| 0        | 0 | 0.017686 | 0 | 0 | 0        | 0 | 0        | 0 |
| 0        | 0 | 0.013018 | 0 | 0 | 0        | 0 | 0        | 0 |
| 0        | 0 | 0.001709 | 0 | 0 | 0        | 0 | 0        | 0 |
| 0        | 0 | 0.033696 | 0 | 0 | 0        | 0 | 0        | 0 |
| 0        | 0 | 0.070154 | 0 | 0 | 0        | 0 | 0        | 0 |
| 0        | 0 | 0.03774  | 0 | 0 | 0        | 0 | 0        | 0 |
| 0        | 0 | 0.009961 | 0 | 0 | 0        | 0 | 0        | 0 |
| 3.29E-05 | 0 | 0.003583 | 0 | 0 | 0        | 0 | 3.29E-05 | 0 |
| 6.57E-05 | 0 | 0.009797 | 0 | 0 | 0        | 0 | 0        | 0 |
| 0.000329 | 0 | 0.009468 | 0 | 0 | 0        | 0 | 0        | 0 |
| 0        | 0 | 0.013709 | 0 | 0 | 0        | 0 | 0        | 0 |
| 0        | 0 | 0.006312 | 0 | 0 | 0        | 0 | 0        | 0 |
| 9.86E-05 | 0 | 0.007988 | 0 | 0 | 0        | 0 | 0        | 0 |
| 0        | 0 | 0.009435 | 0 | 0 | 0        | 0 | 0        | 0 |
| 9.86E-05 | 0 | 0.007002 | 0 | 0 | 0        | 0 | 0        | 0 |
| 0        | 0 | 0.002992 | 0 | 0 | 0        | 0 | 0        | 0 |
| 0        | 0 | 0.004602 | 0 | 0 | 0        | 0 | 0        | 0 |
| 0        | 0 | 0.008745 | 0 | 0 | 0        | 0 | 0        | 0 |
| 0        | 0 | 0.002696 | 0 | 0 | 0        | 0 | 0        | 0 |
| 0        | 0 | 0.001841 | 0 | 0 | 0        | 0 | 0        | 0 |
| 0        | 0 | 0.005589 | 0 | 0 | 0        | 0 | 0        | 0 |
| 0        | 0 | 0.002696 | 0 | 0 | 0        | 0 | 0        | 0 |
| 0        | 0 | 0.000263 | 0 | 0 | 0        | 0 | 0        | 0 |
| 0        | 0 | 0.002761 | 0 | 0 | 0        | 0 | 0        | 0 |
| 0        | 0 | 0.00618  | 0 | 0 | 0        | 0 | 0        | 0 |
| 0        | 0 | 0.002729 | 0 | 0 | 0        | 0 | 0        | 0 |
| 0        | 0 | 0.000953 | 0 | 0 | 0        | 0 | 0.000625 | 0 |
| 0        | 0 | 0.001118 | 0 | 0 | 0        | 0 | 3.29E-05 | 0 |
| 0        | 0 | 9.86E-05 | 0 | 0 | 0        | 0 | 0        | 0 |
| 0        | 0 | 0.009106 | 0 | 0 | 0        | 0 | 0        | 0 |
| 0        | 0 | 0.010355 | 0 | 0 | 0        | 0 | 0        | 0 |
| 0        | 0 | 0.00457  | 0 | 0 | 0        | 0 | 0        | 0 |
| 0        | 0 | 0.004208 | 0 | 0 | 0        | 0 | 0.000625 | 0 |
| 0        | 0 | 0.00092  | 0 | 0 | 3.29E-05 | 0 | 0.000362 | 0 |

|          |   |          |   |   |   |   |          |   |
|----------|---|----------|---|---|---|---|----------|---|
| 0        | 0 | 0.00023  | 0 | 0 | 0 | 0 | 0.000394 | 0 |
| 0        | 0 | 0.012657 | 0 | 0 | 0 | 0 | 0        | 0 |
| 0        | 0 | 0.000559 | 0 | 0 | 0 | 0 | 3.29E-05 | 0 |
| 0        | 0 | 0.000855 | 0 | 0 | 0 | 0 | 0        | 0 |
| 0        | 0 | 3.29E-05 | 0 | 0 | 0 | 0 | 0        | 0 |
| 0        | 0 | 0        | 0 | 0 | 0 | 0 | 0        | 0 |
| 0        | 0 | 0.000131 | 0 | 0 | 0 | 0 | 0        | 0 |
| 0        | 0 | 0        | 0 | 0 | 0 | 0 | 0        | 0 |
| 0        | 0 | 0        | 0 | 0 | 0 | 0 | 0        | 0 |
| 0        | 0 | 0        | 0 | 0 | 0 | 0 | 0        | 0 |
| 0        | 0 | 9.86E-05 | 0 | 0 | 0 | 0 | 0        | 0 |
| 0        | 0 | 0.000197 | 0 | 0 | 0 | 0 | 0        | 0 |
| 0        | 0 | 0.00023  | 0 | 0 | 0 | 0 | 0        | 0 |
| 0        | 0 | 0        | 0 | 0 | 0 | 0 | 0        | 0 |
| 0        | 0 | 0        | 0 | 0 | 0 | 0 | 0        | 0 |
| 0        | 0 | 3.29E-05 | 0 | 0 | 0 | 0 | 0        | 0 |
| 0        | 0 | 0.000131 | 0 | 0 | 0 | 0 | 0        | 0 |
| 9.86E-05 | 0 | 0.006673 | 0 | 0 | 0 | 0 | 0        | 0 |
| 3.29E-05 | 0 | 0.004734 | 0 | 0 | 0 | 0 | 0        | 0 |
| 0        | 0 | 0.005753 | 0 | 0 | 0 | 0 | 0        | 0 |
| 3.29E-05 | 0 | 0.004865 | 0 | 0 | 0 | 0 | 0        | 0 |
| 0        | 0 | 0.001907 | 0 | 0 | 0 | 0 | 0        | 0 |
| 3.29E-05 | 0 | 0.00194  | 0 | 0 | 0 | 0 | 0        | 0 |
| 0        | 0 | 0.001709 | 0 | 0 | 0 | 0 | 0        | 0 |
| 0        | 0 | 0.003945 | 0 | 0 | 0 | 0 | 0        | 0 |
| 0        | 0 | 0.007594 | 0 | 0 | 0 | 0 | 0        | 0 |
| 3.29E-05 | 0 | 0.005819 | 0 | 0 | 0 | 0 | 0        | 0 |
| 0        | 0 | 0.035471 | 0 | 0 | 0 | 0 | 0        | 0 |
| 0        | 0 | 0.003287 | 0 | 0 | 0 | 0 | 0        | 0 |
| 9.86E-05 | 0 | 0.015122 | 0 | 0 | 0 | 0 | 0        | 0 |
| 0.000164 | 0 | 0.029225 | 0 | 0 | 0 | 0 | 0        | 0 |
| 0        | 0 | 0.001414 | 0 | 0 | 0 | 0 | 0        | 0 |
| 0        | 0 | 0.008219 | 0 | 0 | 0 | 0 | 0        | 0 |
| 0        | 0 | 0.001216 | 0 | 0 | 0 | 0 | 0        | 0 |
| 0        | 0 | 0.002498 | 0 | 0 | 0 | 0 | 0        | 0 |
| 0        | 0 | 0.001709 | 0 | 0 | 0 | 0 | 0        | 0 |
| 0        | 0 | 0.009566 | 0 | 0 | 0 | 0 | 0        | 0 |
| 0        | 0 | 0.003715 | 0 | 0 | 0 | 0 | 0        | 0 |
| 0        | 0 | 0.002071 | 0 | 0 | 0 | 0 | 0        | 0 |
| 0        | 0 | 0.003222 | 0 | 0 | 0 | 0 | 0        | 0 |
| 0        | 0 | 0.00595  | 0 | 0 | 0 | 0 | 0        | 0 |
| 0        | 0 | 0.004898 | 0 | 0 | 0 | 0 | 0        | 0 |
| 6.57E-05 | 0 | 0.010257 | 0 | 0 | 0 | 0 | 0        | 0 |
| 0.000131 | 0 | 0.010881 | 0 | 0 | 0 | 0 | 0        | 0 |
| 0        | 0 | 0.0024   | 0 | 0 | 0 | 0 | 0        | 0 |
| 3.29E-05 | 0 | 0.00618  | 0 | 0 | 0 | 0 | 0        | 0 |
| 0.000197 | 0 | 0.002104 | 0 | 0 | 0 | 0 | 0        | 0 |



|          |   |          |   |          |          |   |          |   |
|----------|---|----------|---|----------|----------|---|----------|---|
| 6.57E-05 | 0 | 0.006378 | 0 | 0        | 0        | 0 | 0        | 0 |
| 0.000394 | 0 | 0.010487 | 0 | 0        | 0        | 0 | 0        | 0 |
| 0        | 0 | 0.000329 | 0 | 0        | 0        | 0 | 0        | 0 |
| 0.000657 | 0 | 0.017325 | 0 | 0        | 0        | 0 | 0        | 0 |
| 6.57E-05 | 0 | 0.003616 | 0 | 0        | 0        | 0 | 0        | 0 |
| 0        | 0 | 0.011079 | 0 | 0        | 0        | 0 | 0        | 0 |
| 0        | 0 | 0.008416 | 0 | 0        | 0        | 0 | 0        | 0 |
| 0        | 0 | 0.014563 | 0 | 0        | 0        | 0 | 0        | 0 |
| 0        | 0 | 0.008745 | 0 | 0        | 0        | 0 | 0        | 0 |
| 0        | 0 | 0.003748 | 0 | 0        | 0        | 0 | 0        | 0 |
| 0        | 0 | 0.015517 | 0 | 0        | 0        | 0 | 0        | 0 |
| 0        | 0 | 0.008909 | 0 | 0        | 0        | 0 | 0        | 0 |
| 0        | 0 | 0.023176 | 0 | 0.001118 | 0        | 0 | 0        | 0 |
| 0        | 0 | 0.012952 | 0 | 0        | 0        | 0 | 0        | 0 |
| 3.29E-05 | 0 | 0.021861 | 0 | 0        | 0        | 0 | 0        | 0 |
| 0        | 0 | 0.009303 | 0 | 0        | 0        | 0 | 0        | 0 |
| 0        | 0 | 0.012032 | 0 | 0        | 0        | 0 | 0        | 0 |
| 0        | 0 | 0.019429 | 0 | 0        | 0        | 0 | 0        | 0 |
| 3.29E-05 | 0 | 0.016667 | 0 | 0        | 0        | 0 | 0        | 0 |
| 0        | 0 | 0.000427 | 0 | 0        | 0        | 0 | 0        | 0 |
| 0        | 0 | 0.009402 | 0 | 0        | 0        | 0 | 0        | 0 |
| 0        | 0 | 0.0239   | 0 | 0        | 0        | 0 | 0        | 0 |
| 3.29E-05 | 0 | 0.015977 | 0 | 0        | 0        | 0 | 0        | 0 |
| 0        | 0 | 0.043098 | 0 | 0        | 0        | 0 | 0        | 0 |
| 6.57E-05 | 0 | 0.026661 | 0 | 0        | 0        | 0 | 0        | 0 |
| 6.57E-05 | 0 | 0.012821 | 0 | 0        | 0        | 0 | 0        | 0 |
| 9.86E-05 | 0 | 0.011046 | 0 | 0        | 0        | 0 | 0        | 0 |
| 0        | 0 | 0.013446 | 0 | 0        | 0        | 0 | 0        | 0 |
| 9.86E-05 | 0 | 0.008449 | 0 | 0        | 0        | 0 | 0        | 0 |
| 0        | 0 | 0.010454 | 0 | 0        | 0        | 0 | 0        | 0 |
| 0        | 0 | 0.014695 | 0 | 0        | 0        | 0 | 0        | 0 |
| 0        | 0 | 0.032414 | 0 | 0        | 0        | 0 | 0        | 0 |
| 0        | 0 | 0.042441 | 0 | 0        | 0        | 0 | 0        | 0 |
| 9.86E-05 | 0 | 0.009303 | 0 | 0        | 0        | 0 | 0        | 0 |
| 0        | 0 | 0.01407  | 0 | 0        | 0        | 0 | 3.29E-05 | 0 |
| 0        | 0 | 0.018344 | 0 | 0        | 0        | 0 | 0        | 0 |
| 0        | 0 | 0.006345 | 0 | 0        | 0        | 0 | 0        | 0 |
| 0        | 0 | 0.000131 | 0 | 0        | 0        | 0 | 0        | 0 |
| 0        | 0 | 0.000197 | 0 | 0        | 0        | 0 | 0        | 0 |
| 0        | 0 | 0.000559 | 0 | 0        | 0        | 0 | 0        | 0 |
| 0        | 0 | 0.005391 | 0 | 0        | 0        | 0 | 0        | 0 |
| 0        | 0 | 3.29E-05 | 0 | 0        | 0        | 0 | 0        | 0 |
| 0        | 0 | 6.57E-05 | 0 | 0        | 0        | 0 | 0        | 0 |
| 0        | 0 | 0.001183 | 0 | 0        | 0        | 0 | 0        | 0 |
| 0        | 0 | 3.29E-05 | 0 | 0        | 0        | 0 | 0        | 0 |
| 9.86E-05 | 0 | 0.005589 | 0 | 0        | 0        | 0 | 0        | 0 |
| 6.57E-05 | 0 | 0.008876 | 0 | 9.86E-05 | 3.29E-05 | 0 | 0        | 0 |

|          |   |          |   |   |   |           |   |   |
|----------|---|----------|---|---|---|-----------|---|---|
| 3.29E-05 | 0 | 0.04872  | 0 | 0 | 0 | 0         | 0 | 0 |
| 0        | 0 | 0.00789  | 0 | 0 | 0 | 0         | 0 | 0 |
| 0        | 0 | 0.018311 | 0 | 0 | 0 | 0         | 0 | 0 |
| 0        | 0 | 0.022091 | 0 | 0 | 0 | 0         | 0 | 0 |
| 0        | 0 | 0.020842 | 0 | 0 | 0 | 0         | 0 | 0 |
| 0        | 0 | 0.025017 | 0 | 0 | 0 | 0         | 0 | 0 |
| 0        | 0 | 0.006904 | 0 | 0 | 0 | 0         | 0 | 0 |
| 0        | 0 | 0.002729 | 0 | 0 | 0 | 0         | 0 | 0 |
| 0        | 0 | 0.004076 | 0 | 0 | 0 | 0.000131  |   | 0 |
| 0        | 0 | 0.009797 | 0 | 0 | 0 | 0         | 0 | 0 |
| 0        | 0 | 0.006213 | 0 | 0 | 0 | 0         | 0 | 0 |
| 0        | 0 | 0.008416 | 0 | 0 | 0 | 0         | 0 | 0 |
| 0        | 0 | 0.001414 | 0 | 0 | 0 | 0         | 0 | 0 |
| 0        | 0 | 0.000625 | 0 | 0 | 0 | 0         | 0 | 0 |
| 0        | 0 | 0.003879 | 0 | 0 | 0 | 0         | 0 | 0 |
| 0        | 0 | 0.00572  | 0 | 0 | 0 | 0         | 0 | 0 |
| 0        | 0 | 0.000592 | 0 | 0 | 0 | 0         | 0 | 0 |
| 0        | 0 | 0.000164 | 0 | 0 | 0 | 0         | 0 | 0 |
| 0        | 0 | 0.002564 | 0 | 0 | 0 | 0         | 0 | 0 |
| 0        | 0 | 0        | 0 | 0 | 0 | 0         | 0 | 0 |
| 0        | 0 | 0.00046  | 0 | 0 | 0 | 0         | 0 | 0 |
| 0        | 0 | 0.000197 | 0 | 0 | 0 | 0         | 0 | 0 |
| 0        | 0 | 0.00046  | 0 | 0 | 0 | 0         | 0 | 0 |
| 0        | 0 | 0.000329 | 0 | 0 | 0 | 0         | 0 | 0 |
| 3.29E-05 | 0 | 0.012098 | 0 | 0 | 0 | 0         | 0 | 0 |
| 0.000131 | 0 | 0.01601  | 0 | 0 | 0 | 0         | 0 | 0 |
| 0        | 0 | 0.004274 | 0 | 0 | 0 | 0         | 0 | 0 |
| 0        | 0 | 0.020875 | 0 | 0 | 0 | 0         | 0 | 0 |
| 0        | 0 | 0.01361  | 0 | 0 | 0 | 0         | 0 | 0 |
| 3.29E-05 | 0 | 0.020481 | 0 | 0 | 0 | 0         | 0 | 0 |
| 3.29E-05 | 0 | 0.031625 | 0 | 0 | 0 | 0         | 0 | 0 |
| 6.57E-05 | 0 | 0.009632 | 0 | 0 | 0 | 0         | 0 | 0 |
| 6.57E-05 | 0 | 0.002893 | 0 | 0 | 0 | 0         | 0 | 0 |
| 3.29E-05 | 0 | 0.037246 | 0 | 0 | 0 | 0         | 0 | 0 |
| 0.000164 | 0 | 0.019626 | 0 | 0 | 0 | 0         | 0 | 0 |
| 0        | 0 | 0.002268 | 0 | 0 | 0 | 0         | 0 | 0 |
| 0.000131 | 0 | 0.007824 | 0 | 0 | 0 | 0         | 0 | 0 |
| 0        | 0 | 0.007725 | 0 | 0 | 0 | 0         | 0 | 0 |
| 0        | 0 | 0.004109 | 0 | 0 | 0 | 0         | 0 | 0 |
| 0        | 0 | 0.004011 | 0 | 0 | 0 | 0         | 0 | 0 |
| 0        | 0 | 0.008514 | 0 | 0 | 0 | 0         | 0 | 0 |
| 0.000625 | 0 | 0.022979 | 0 | 0 | 0 | 0.986E-05 |   | 0 |
| 3.29E-05 | 0 | 0.00881  | 0 | 0 | 0 | 0         | 0 | 0 |
| 0        | 0 | 0.009271 | 0 | 0 | 0 | 0         | 0 | 0 |
| 0        | 0 | 0.019396 | 0 | 0 | 0 | 0         | 0 | 0 |
| 0.000493 | 0 | 0.005358 | 0 | 0 | 0 | 0         | 0 | 0 |
| 0        | 0 | 0.010388 | 0 | 0 | 0 | 0         | 0 | 0 |

|          |   |          |   |   |          |   |          |   |
|----------|---|----------|---|---|----------|---|----------|---|
| 0        | 0 | 0.008843 | 0 | 0 | 0        | 0 | 0        | 0 |
| 0        | 0 | 0.009402 | 0 | 0 | 0        | 0 | 0        | 0 |
| 6.57E-05 | 0 | 0.008021 | 0 | 0 | 0        | 0 | 0        | 0 |
| 6.57E-05 | 0 | 0.01167  | 0 | 0 | 0        | 0 | 0        | 0 |
| 0.000427 | 0 | 0.008383 | 0 | 0 | 0        | 0 | 0        | 0 |
| 3.29E-05 | 0 | 0.007167 | 0 | 0 | 0        | 0 | 0        | 0 |
| 0.000493 | 0 | 0.007364 | 0 | 0 | 0        | 0 | 0.000164 | 0 |
| 0        | 0 | 0.026135 | 0 | 0 | 0        | 0 | 0        | 0 |
| 3.29E-05 | 0 | 0.017456 | 0 | 0 | 0        | 0 | 0        | 0 |
| 0.000296 | 0 | 0.012492 | 0 | 0 | 0        | 0 | 0        | 0 |
| 6.57E-05 | 0 | 0.021467 | 0 | 0 | 0        | 0 | 0        | 0 |
| 0.000592 | 0 | 0.022486 | 0 | 0 | 0        | 0 | 0        | 0 |
| 3.29E-05 | 0 | 0.017358 | 0 | 0 | 0        | 0 | 0        | 0 |
| 0        | 0 | 0.001282 | 0 | 0 | 0        | 0 | 0        | 0 |
| 0        | 0 | 0.005753 | 0 | 0 | 0        | 0 | 0        | 0 |
| 0        | 0 | 0.004833 | 0 | 0 | 0        | 0 | 0        | 0 |
| 0        | 0 | 0.001677 | 0 | 0 | 0        | 0 | 0        | 0 |
| 3.29E-05 | 0 | 0.012722 | 0 | 0 | 0        | 0 | 0        | 0 |
| 6.57E-05 | 0 | 0.010783 | 0 | 0 | 0        | 0 | 0        | 0 |
| 9.86E-05 | 0 | 0.015385 | 0 | 0 | 0        | 0 | 0        | 0 |
| 3.29E-05 | 0 | 0.004898 | 0 | 0 | 0        | 0 | 0        | 0 |
| 6.57E-05 | 0 | 0.015747 | 0 | 0 | 0        | 0 | 0        | 0 |
| 3.29E-05 | 0 | 0.009336 | 0 | 0 | 0        | 0 | 0        | 0 |
| 0        | 0 | 0.007199 | 0 | 0 | 0        | 0 | 0        | 0 |
| 3.29E-05 | 0 | 0.020908 | 0 | 0 | 0        | 0 | 0        | 0 |
| 0        | 0 | 0.000296 | 0 | 0 | 0        | 0 | 0        | 0 |
| 0        | 0 | 0.000756 | 0 | 0 | 0        | 0 | 0        | 0 |
| 0        | 0 | 0        | 0 | 0 | 0        | 0 | 0        | 0 |
| 0        | 0 | 3.29E-05 | 0 | 0 | 0        | 0 | 0        | 0 |
| 0        | 0 | 0        | 0 | 0 | 0        | 0 | 0        | 0 |
| 0        | 0 | 0.000131 | 0 | 0 | 0        | 0 | 0        | 0 |
| 0        | 0 | 0        | 0 | 0 | 0        | 0 | 0        | 0 |
| 0        | 0 | 0        | 0 | 0 | 0        | 0 | 0        | 0 |
| 0        | 0 | 0        | 0 | 0 | 6.57E-05 | 0 | 0        | 0 |
| 0        | 0 | 3.29E-05 | 0 | 0 | 0        | 0 | 0        | 0 |
| 3.29E-05 | 0 | 0.014596 | 0 | 0 | 0        | 0 | 0        | 0 |
| 0        | 0 | 0.011605 | 0 | 0 | 0        | 0 | 0        | 0 |
| 0        | 0 | 0.021039 | 0 | 0 | 0        | 0 | 0        | 0 |
| 6.57E-05 | 0 | 0.00503  | 0 | 0 | 0        | 0 | 0        | 0 |
| 0        | 0 | 0.017588 | 0 | 0 | 0        | 0 | 6.57E-05 | 0 |
| 0        | 0 | 0.00835  | 0 | 0 | 0        | 0 | 0        | 0 |
| 0        | 0 | 0.010487 | 0 | 0 | 0        | 0 | 0        | 0 |
| 3.29E-05 | 0 | 0.011243 | 0 | 0 | 0        | 0 | 0        | 0 |
| 0.000263 | 0 | 0.016733 | 0 | 0 | 0        | 0 | 0        | 0 |
| 3.29E-05 | 0 | 0.011539 | 0 | 0 | 0        | 0 | 0        | 0 |
| 0        | 0 | 0.006378 | 0 | 0 | 0        | 0 | 0        | 0 |
| 0        | 0 | 0.004307 | 0 | 0 | 0        | 0 | 0        | 0 |

|          |   |          |   |   |   |   |          |   |
|----------|---|----------|---|---|---|---|----------|---|
| 0        | 0 | 0.017752 | 0 | 0 | 0 | 0 | 0        | 0 |
| 0        | 0 | 0.027417 | 0 | 0 | 0 | 0 | 0        | 0 |
| 0        | 0 | 0.012459 | 0 | 0 | 0 | 0 | 0        | 0 |
| 0        | 0 | 0.01864  | 0 | 0 | 0 | 0 | 0        | 0 |
| 0        | 0 | 0.012229 | 0 | 0 | 0 | 0 | 0        | 0 |
| 0        | 0 | 0.001085 | 0 | 0 | 0 | 0 | 0        | 0 |
| 0        | 0 | 0.001249 | 0 | 0 | 0 | 0 | 0        | 0 |
| 0        | 0 | 0.008416 | 0 | 0 | 0 | 0 | 0        | 0 |
| 0        | 0 | 0.000888 | 0 | 0 | 0 | 0 | 0        | 0 |
| 3.29E-05 | 0 | 0.002893 | 0 | 0 | 0 | 0 | 0        | 0 |
| 0.000296 | 0 | 0.00263  | 0 | 0 | 0 | 0 | 9.86E-05 | 0 |
| 0        | 0 | 0.001775 | 0 | 0 | 0 | 0 | 0        | 0 |
| 0        | 0 | 0.00023  | 0 | 0 | 0 | 0 | 0        | 0 |
| 3.29E-05 | 0 | 0.001315 | 0 | 0 | 0 | 0 | 0        | 0 |
| 0        | 0 | 0.003518 | 0 | 0 | 0 | 0 | 0        | 0 |
| 0        | 0 | 0.002334 | 0 | 0 | 0 | 0 | 0        | 0 |
| 3.29E-05 | 0 | 0.000526 | 0 | 0 | 0 | 0 | 0        | 0 |
| 0        | 0 | 0.002334 | 0 | 0 | 0 | 0 | 0        | 0 |
| 0        | 0 | 0.001348 | 0 | 0 | 0 | 0 | 0        | 0 |
| 0        | 0 | 0.001183 | 0 | 0 | 0 | 0 | 0        | 0 |
| 0.000296 | 0 | 0.004175 | 0 | 0 | 0 | 0 | 0        | 0 |
| 6.57E-05 | 0 | 0.001874 | 0 | 0 | 0 | 0 | 0        | 0 |
| 0        | 0 | 0.001151 | 0 | 0 | 0 | 0 | 0        | 0 |

















|          |          |          |   |          |   |          |          |   |
|----------|----------|----------|---|----------|---|----------|----------|---|
| 0.000657 | 0        | 0        | 0 | 0        | 0 | 0        | 0        | 0 |
| 0.000296 | 0        | 0        | 0 | 0        | 0 | 0        | 0        | 0 |
| 0.00046  | 0        | 0        | 0 | 0        | 0 | 0        | 0        | 0 |
| 9.86E-05 | 0        | 0        | 0 | 0        | 0 | 0        | 0        | 0 |
| 3.29E-05 | 0        | 0        | 0 | 0        | 0 | 0        | 0        | 0 |
| 0        | 0        | 0        | 0 | 0        | 0 | 0        | 0        | 0 |
| 0        | 0        | 0        | 0 | 0        | 0 | 0        | 0        | 0 |
| 0        | 0        | 0        | 0 | 0        | 0 | 0        | 0        | 0 |
| 0        | 0        | 0        | 0 | 0        | 0 | 0        | 0        | 0 |
| 9.86E-05 | 0        | 0        | 0 | 0        | 0 | 0        | 0        | 0 |
| 9.86E-05 | 0        | 0        | 0 | 0        | 0 | 0        | 0        | 0 |
| 3.29E-05 | 0        | 0        | 0 | 0        | 0 | 0        | 0        | 0 |
| 0        | 0        | 0        | 0 | 0        | 0 | 0        | 0        | 0 |
| 0.001216 | 0        | 0        | 0 | 0        | 0 | 0        | 0        | 0 |
| 6.57E-05 | 0        | 0        | 0 | 0        | 0 | 0        | 0        | 0 |
| 9.86E-05 | 0        | 0        | 0 | 0        | 0 | 0        | 0        | 0 |
| 0.000427 | 0        | 0        | 0 | 0        | 0 | 0        | 0        | 0 |
| 0.000789 | 0        | 0        | 0 | 0        | 0 | 0        | 0        | 0 |
| 0.00023  | 0        | 0        | 0 | 0        | 0 | 0        | 0        | 0 |
| 0        | 0        | 0        | 0 | 0        | 0 | 0        | 0        | 0 |
| 6.57E-05 | 0        | 0        | 0 | 0        | 0 | 0        | 0        | 0 |
| 0.002827 | 0        | 0        | 0 | 0        | 0 | 0        | 0        | 0 |
| 0.000427 | 0        | 0        | 0 | 0        | 0 | 0        | 0        | 0 |
| 0.000625 | 0        | 0        | 0 | 0        | 0 | 0        | 0        | 0 |
| 0.000657 | 0        | 0        | 0 | 0        | 0 | 0        | 0        | 0 |
| 0.000493 | 0        | 0        | 0 | 0        | 0 | 0        | 0        | 0 |
| 0        | 0        | 0        | 0 | 0        | 0 | 0        | 0        | 0 |
| 6.57E-05 | 0        | 0        | 0 | 0        | 0 | 0        | 0        | 0 |
| 9.86E-05 | 0        | 0        | 0 | 0        | 0 | 0        | 0        | 0 |
| 0        | 0        | 0        | 0 | 0        | 0 | 0        | 0        | 0 |
| 0.000625 | 0        | 0        | 0 | 0        | 0 | 0        | 0        | 0 |
| 9.86E-05 | 0        | 0        | 0 | 0        | 0 | 0        | 0        | 0 |
| 0.000263 | 0        | 0        | 0 | 0        | 0 | 0        | 0        | 0 |
| 0.000131 | 0        | 0        | 0 | 0        | 0 | 0        | 6.57E-05 | 0 |
| 0.000723 | 0        | 0        | 0 | 0        | 0 | 0        | 0        | 0 |
| 0.000625 | 0        | 0        | 0 | 0        | 0 | 0        | 0        | 0 |
| 0.000362 | 0        | 0        | 0 | 0        | 0 | 0        | 0        | 0 |
| 0.001183 | 0        | 0        | 0 | 0        | 0 | 0        | 0        | 0 |
| 0.001972 | 0        | 0        | 0 | 0        | 0 | 0        | 0        | 0 |
| 0.000296 | 0        | 0        | 0 | 0        | 0 | 0        | 0        | 0 |
| 0        | 0        | 0        | 0 | 0        | 0 | 0        | 0        | 0 |
| 9.86E-05 | 0        | 0        | 0 | 0        | 0 | 0        | 0        | 0 |
| 0.000197 | 0        | 0        | 0 | 0.000164 | 0 | 0        | 0        | 0 |
| 0        | 0        | 0        | 0 | 0        | 0 | 0        | 0        | 0 |
| 9.86E-05 | 0        | 0        | 0 | 0        | 0 | 6.57E-05 | 0        | 0 |
| 0.003057 | 0.001578 | 0        | 0 | 0        | 0 | 0        | 0        | 0 |
| 0.002564 | 0        | 6.57E-05 | 0 | 0        | 0 | 0        | 0.00023  | 0 |

|          |          |   |   |          |   |   |   |   |
|----------|----------|---|---|----------|---|---|---|---|
| 0.001512 | 3.29E-05 | 0 | 0 | 6.57E-05 | 0 | 0 | 0 | 0 |
| 0.001151 | 0        | 0 | 0 | 0        | 0 | 0 | 0 | 0 |
| 0.000263 | 0        | 0 | 0 | 0        | 0 | 0 | 0 | 0 |
| 3.29E-05 | 0        | 0 | 0 | 0        | 0 | 0 | 0 | 0 |
| 0        | 0        | 0 | 0 | 0        | 0 | 0 | 0 | 0 |
| 0        | 0        | 0 | 0 | 0        | 0 | 0 | 0 | 0 |
| 0        | 0        | 0 | 0 | 0        | 0 | 0 | 0 | 0 |
| 0        | 0        | 0 | 0 | 0        | 0 | 0 | 0 | 0 |
| 3.29E-05 | 0        | 0 | 0 | 0        | 0 | 0 | 0 | 0 |
| 0        | 0        | 0 | 0 | 0        | 0 | 0 | 0 | 0 |
| 0        | 0        | 0 | 0 | 0        | 0 | 0 | 0 | 0 |
| 0        | 0        | 0 | 0 | 0        | 0 | 0 | 0 | 0 |
| 0        | 0        | 0 | 0 | 0        | 0 | 0 | 0 | 0 |
| 0        | 0        | 0 | 0 | 0        | 0 | 0 | 0 | 0 |
| 3.29E-05 | 0        | 0 | 0 | 0        | 0 | 0 | 0 | 0 |
| 0.00023  | 0        | 0 | 0 | 0        | 0 | 0 | 0 | 0 |
| 0.010848 | 0        | 0 | 0 | 0        | 0 | 0 | 0 | 0 |
| 0.002564 | 0        | 0 | 0 | 0        | 0 | 0 | 0 | 0 |
| 0.001907 | 0        | 0 | 0 | 0        | 0 | 0 | 0 | 0 |
| 0.001644 | 0        | 0 | 0 | 0        | 0 | 0 | 0 | 0 |
| 0.000427 | 0        | 0 | 0 | 0        | 0 | 0 | 0 | 0 |
| 0.00069  | 0        | 0 | 0 | 0        | 0 | 0 | 0 | 0 |
| 0.000164 | 0        | 0 | 0 | 0        | 0 | 0 | 0 | 0 |
| 0.001907 | 0        | 0 | 0 | 0        | 0 | 0 | 0 | 0 |
| 0.000263 | 0        | 0 | 0 | 0        | 0 | 0 | 0 | 0 |
| 0.000493 | 0        | 0 | 0 | 0        | 0 | 0 | 0 | 0 |
| 0.000723 | 0        | 0 | 0 | 0        | 0 | 0 | 0 | 0 |
| 0.000197 | 0        | 0 | 0 | 0        | 0 | 0 | 0 | 0 |
| 0.000329 | 0        | 0 | 0 | 0        | 0 | 0 | 0 | 0 |
| 0.001282 | 0        | 0 | 0 | 0        | 0 | 0 | 0 | 0 |
| 6.57E-05 | 0        | 0 | 0 | 0        | 0 | 0 | 0 | 0 |
| 0.000526 | 0        | 0 | 0 | 0        | 0 | 0 | 0 | 0 |
| 3.29E-05 | 0        | 0 | 0 | 0        | 0 | 0 | 0 | 0 |
| 0.000131 | 0        | 0 | 0 | 0        | 0 | 0 | 0 | 0 |
| 0.000493 | 0        | 0 | 0 | 0        | 0 | 0 | 0 | 0 |
| 0.000756 | 0        | 0 | 0 | 0        | 0 | 0 | 0 | 0 |
| 0.00023  | 0        | 0 | 0 | 0        | 0 | 0 | 0 | 0 |
| 0.000789 | 0        | 0 | 0 | 0        | 0 | 0 | 0 | 0 |
| 0.000296 | 0        | 0 | 0 | 0        | 0 | 0 | 0 | 0 |
| 0.000657 | 0        | 0 | 0 | 0        | 0 | 0 | 0 | 0 |
| 0.000197 | 0        | 0 | 0 | 0        | 0 | 0 | 0 | 0 |
| 0.001644 | 0        | 0 | 0 | 0        | 0 | 0 | 0 | 0 |
| 0.00217  | 0        | 0 | 0 | 0        | 0 | 0 | 0 | 0 |
| 0.000493 | 0        | 0 | 0 | 0        | 0 | 0 | 0 | 0 |
| 0.00092  | 0        | 0 | 0 | 0        | 0 | 0 | 0 | 0 |
| 0.000329 | 0        | 0 | 0 | 0        | 0 | 0 | 0 | 0 |



























|   |          |   |   |   |   |   |   |   |
|---|----------|---|---|---|---|---|---|---|
| 0 | 0        | 0 | 0 | 0 | 0 | 0 | 0 | 0 |
| 0 | 0        | 0 | 0 | 0 | 0 | 0 | 0 | 0 |
| 0 | 0        | 0 | 0 | 0 | 0 | 0 | 0 | 0 |
| 0 | 0        | 0 | 0 | 0 | 0 | 0 | 0 | 0 |
| 0 | 6.57E-05 | 0 | 0 | 0 | 0 | 0 | 0 | 0 |
| 0 | 0        | 0 | 0 | 0 | 0 | 0 | 0 | 0 |
| 0 | 0        | 0 | 0 | 0 | 0 | 0 | 0 | 0 |
| 0 | 0        | 0 | 0 | 0 | 0 | 0 | 0 | 0 |
| 0 | 0        | 0 | 0 | 0 | 0 | 0 | 0 | 0 |
| 0 | 0        | 0 | 0 | 0 | 0 | 0 | 0 | 0 |
| 0 | 0        | 0 | 0 | 0 | 0 | 0 | 0 | 0 |
| 0 | 0        | 0 | 0 | 0 | 0 | 0 | 0 | 0 |
| 0 | 0        | 0 | 0 | 0 | 0 | 0 | 0 | 0 |
| 0 | 0        | 0 | 0 | 0 | 0 | 0 | 0 | 0 |
| 0 | 0        | 0 | 0 | 0 | 0 | 0 | 0 | 0 |
| 0 | 0        | 0 | 0 | 0 | 0 | 0 | 0 | 0 |
| 0 | 0        | 0 | 0 | 0 | 0 | 0 | 0 | 0 |
| 0 | 0        | 0 | 0 | 0 | 0 | 0 | 0 | 0 |
| 0 | 0        | 0 | 0 | 0 | 0 | 0 | 0 | 0 |
| 0 | 0        | 0 | 0 | 0 | 0 | 0 | 0 | 0 |
| 0 | 0        | 0 | 0 | 0 | 0 | 0 | 0 | 0 |
| 0 | 0        | 0 | 0 | 0 | 0 | 0 | 0 | 0 |
| 0 | 0        | 0 | 0 | 0 | 0 | 0 | 0 | 0 |
| 0 | 0        | 0 | 0 | 0 | 0 | 0 | 0 | 0 |
| 0 | 0        | 0 | 0 | 0 | 0 | 0 | 0 | 0 |
| 0 | 0        | 0 | 0 | 0 | 0 | 0 | 0 | 0 |
| 0 | 0        | 0 | 0 | 0 | 0 | 0 | 0 | 0 |
| 0 | 0        | 0 | 0 | 0 | 0 | 0 | 0 | 0 |
| 0 | 0        | 0 | 0 | 0 | 0 | 0 | 0 | 0 |
| 0 | 0        | 0 | 0 | 0 | 0 | 0 | 0 | 0 |
| 0 | 0        | 0 | 0 | 0 | 0 | 0 | 0 | 0 |
| 0 | 0        | 0 | 0 | 0 | 0 | 0 | 0 | 0 |
| 0 | 0        | 0 | 0 | 0 | 0 | 0 | 0 | 0 |
| 0 | 0.000822 | 0 | 0 | 0 | 0 | 0 | 0 | 0 |
| 0 | 0        | 0 | 0 | 0 | 0 | 0 | 0 | 0 |
| 0 | 0        | 0 | 0 | 0 | 0 | 0 | 0 | 0 |
| 0 | 0        | 0 | 0 | 0 | 0 | 0 | 0 | 0 |
| 0 | 0        | 0 | 0 | 0 | 0 | 0 | 0 | 0 |
| 0 | 0        | 0 | 0 | 0 | 0 | 0 | 0 | 0 |
| 0 | 0        | 0 | 0 | 0 | 0 | 0 | 0 | 0 |
| 0 | 0        | 0 | 0 | 0 | 0 | 0 | 0 | 0 |
| 0 | 6.57E-05 | 0 | 0 | 0 | 0 | 0 | 0 | 0 |
| 0 | 6.57E-05 | 0 | 0 | 0 | 0 | 0 | 0 | 0 |









































| k_Bacteri |
|-----------|-----------|-----------|-----------|-----------|-----------|-----------|-----------|-----------|
| 0         | 0         | 0         | 0.012328  | 0         | 0         | 0         | 0         | 0         |
| 0         | 0         | 0         | 0.002531  | 0         | 0         | 0         | 0         | 0         |
| 0         | 3.29E-05  | 0         | 0.001841  | 0         | 0         | 0         | 0         | 0         |
| 0         | 9.86E-05  | 0         | 0.004307  | 0         | 0         | 0         | 0         | 0         |
| 0         | 0.000164  | 0         | 0.020349  | 0         | 0         | 0         | 0         | 0         |
| 0         | 0         | 0         | 0.001874  | 0         | 0         | 0         | 0         | 0         |
| 0         | 0         | 0         | 0.017916  | 0         | 0         | 0         | 0         | 0         |
| 0         | 0         | 0         | 0.003057  | 0         | 0         | 0         | 0         | 0         |
| 0         | 3.29E-05  | 0         | 0.019133  | 0         | 0         | 0         | 0         | 0         |
| 0         | 3.29E-05  | 0         | 0.008975  | 0         | 0         | 0         | 0         | 0         |
| 0         | 3.29E-05  | 0         | 0.00641   | 0         | 0         | 0         | 0         | 0         |
| 0         | 0         | 0         | 0.000296  | 0         | 0         | 0         | 0         | 0         |
| 0         | 3.29E-05  | 0         | 0.003123  | 0         | 0         | 0         | 0         | 0         |
| 0         | 3.29E-05  | 0         | 0.003912  | 0         | 0         | 0         | 0         | 0         |
| 0         | 0         | 0         | 0.009303  | 0         | 0         | 0         | 0         | 0         |
| 0         | 0         | 0         | 0.014991  | 0         | 0         | 0         | 0         | 0         |
| 0         | 0         | 0         | 0.005326  | 0         | 0         | 0         | 0         | 0         |
| 0         | 0         | 0         | 0.00023   | 0         | 0         | 0         | 0         | 0         |
| 0         | 0         | 0         | 0.001151  | 0         | 0         | 0         | 0         | 0         |
| 0         | 0         | 0         | 0.000164  | 0         | 0         | 0         | 0         | 0         |
| 0         | 0         | 0         | 0.055031  | 0         | 0         | 0         | 0         | 0         |
| 0         | 0         | 0         | 0.073605  | 0         | 0         | 0         | 0         | 0         |
| 0         | 0         | 0         | 0.031165  | 0         | 0         | 0         | 0         | 0         |
| 0         | 0         | 0         | 0.032841  | 0         | 0         | 0         | 0         | 0         |
| 0         | 0         | 0         | 0.026069  | 0         | 0         | 0         | 0         | 0         |
| 0         | 0         | 0         | 0.02722   | 0         | 0         | 0         | 0         | 0         |
| 0         | 0         | 0         | 0.047668  | 0         | 0         | 0         | 0         | 0         |
| 0         | 0         | 0         | 0.027779  | 0         | 0         | 0         | 0         | 0         |
| 0         | 0         | 0         | 0.025477  | 0         | 0         | 0         | 0         | 0         |
| 0         | 0         | 0         | 0.016437  | 0         | 0         | 0         | 0         | 0         |
| 0         | 0         | 0         | 0.1026    | 0         | 0         | 0         | 0         | 0         |
| 0         | 0         | 0         | 0.019133  | 0         | 0         | 0         | 0         | 0         |
| 0         | 0         | 0         | 0.013314  | 0         | 0         | 0         | 0         | 0         |
| 0         | 0         | 0         | 0.007594  | 0         | 0         | 0         | 0         | 0         |
| 0         | 0         | 0         | 0.012032  | 0         | 0         | 0         | 0         | 0         |
| 0         | 0         | 0         | 0.005687  | 0         | 0         | 0         | 0         | 0         |
| 0         | 0         | 0         | 0.074592  | 0         | 0         | 0         | 0         | 0         |
| 0         | 0         | 0         | 0.02002   | 0         | 0         | 0         | 0         | 0         |
| 0         | 0         | 0         | 0.028305  | 0         | 0         | 0         | 0         | 0         |
| 0         | 0         | 0         | 0.046122  | 0         | 0         | 0         | 0         | 0         |
| 0         | 0         | 0         | 0.003419  | 0         | 0         | 0         | 0         | 0         |
| 0         | 0         | 0         | 0.009632  | 0         | 0         | 0         | 0         | 0         |
| 0         | 0         | 0         | 0.010585  | 0         | 0         | 0         | 0         | 0         |
| 0         | 0         | 0         | 0.000855  | 0         | 0         | 0         | 0         | 0         |

|          |          |   |          |          |          |   |   |          |
|----------|----------|---|----------|----------|----------|---|---|----------|
| 0        | 0        | 0 | 0.017982 | 0        | 0        | 0 | 0 | 0        |
| 0        | 0        | 0 | 0.018607 | 0        | 0        | 0 | 0 | 0        |
| 0        | 0        | 0 | 0.000625 | 0        | 0        | 0 | 0 | 0        |
| 0        | 0        | 0 | 0.006608 | 0        | 0        | 0 | 0 | 0        |
| 0        | 0        | 0 | 0.015911 | 0        | 0        | 0 | 0 | 0        |
| 0        | 0        | 0 | 0.00069  | 0        | 0        | 0 | 0 | 0        |
| 0        | 0        | 0 | 0.001052 | 0        | 0        | 0 | 0 | 0        |
| 0        | 0        | 0 | 0.002071 | 0        | 0        | 0 | 0 | 0        |
| 0        | 0        | 0 | 0.042375 | 0        | 0        | 0 | 0 | 0        |
| 0        | 0        | 0 | 0.019856 | 0        | 0        | 0 | 0 | 0        |
| 0        | 3.29E-05 | 0 | 0.065321 | 0.000394 | 0        | 0 | 0 | 0        |
| 0        | 0        | 0 | 0.012459 | 0        | 0        | 0 | 0 | 0        |
| 0        | 0        | 0 | 0.029521 | 0        | 0        | 0 | 0 | 0        |
| 0        | 0        | 0 | 0.021993 | 0        | 0        | 0 | 0 | 0        |
| 0        | 0        | 0 | 0.04678  | 0        | 0        | 0 | 0 | 0        |
| 0        | 0        | 0 | 0.016864 | 0        | 0        | 0 | 0 | 0        |
| 0        | 0        | 0 | 0.009271 | 0        | 0        | 0 | 0 | 0        |
| 0        | 3.29E-05 | 0 | 0.026332 | 0        | 0        | 0 | 0 | 0        |
| 0        | 0        | 0 | 0.014498 | 0        | 0        | 0 | 0 | 0        |
| 0        | 0        | 0 | 0.024886 | 0        | 0        | 0 | 0 | 0        |
| 0        | 0        | 0 | 0.097636 | 0        | 0        | 0 | 0 | 3.29E-05 |
| 0        | 0        | 0 | 0.003879 | 0        | 0        | 0 | 0 | 0        |
| 0        | 0        | 0 | 0.009566 | 0        | 0        | 0 | 0 | 0        |
| 0        | 0        | 0 | 0.009271 | 0        | 0        | 0 | 0 | 0        |
| 0        | 0        | 0 | 0.006378 | 0        | 0        | 0 | 0 | 0        |
| 0        | 0        | 0 | 0.00618  | 0        | 0        | 0 | 0 | 0        |
| 3.29E-05 | 0        | 0 | 0.001512 | 0        | 0        | 0 | 0 | 0        |
| 0        | 0        | 0 | 0.000362 | 0        | 0        | 0 | 0 | 0        |
| 0        | 0        | 0 | 0.007561 | 0        | 0        | 0 | 0 | 0        |
| 0        | 0        | 0 | 0.009698 | 0        | 3.29E-05 | 0 | 0 | 0        |
| 0        | 0        | 0 | 0.010454 | 0        | 0        | 0 | 0 | 0        |
| 0        | 0        | 0 | 0.009599 | 0        | 0        | 0 | 0 | 0        |
| 0        | 0        | 0 | 0.013084 | 0        | 0        | 0 | 0 | 0        |
| 0        | 0        | 0 | 0.011013 | 0        | 0        | 0 | 0 | 0        |
| 0        | 0        | 0 | 0.035767 | 0        | 0        | 0 | 0 | 0        |
| 0        | 0        | 0 | 0.009303 | 0        | 0        | 0 | 0 | 0        |
| 0        | 0        | 0 | 0.012394 | 0        | 0        | 0 | 0 | 0        |
| 0        | 0        | 0 | 0.057201 | 0        | 0        | 0 | 0 | 0        |
| 0        | 0        | 0 | 0.010684 | 0        | 0        | 0 | 0 | 0        |
| 0        | 0        | 0 | 0.013084 | 0        | 0        | 0 | 0 | 0        |
| 0        | 3.29E-05 | 0 | 0.008054 | 0        | 0        | 0 | 0 | 0        |
| 0        | 3.29E-05 | 0 | 0.016996 | 0        | 0        | 0 | 0 | 0        |
| 3.29E-05 | 0        | 0 | 0.014366 | 0        | 0        | 0 | 0 | 0        |
| 6.57E-05 | 9.86E-05 | 0 | 0.001775 | 0        | 0        | 0 | 0 | 0        |
| 0        | 0        | 0 | 0.009764 | 0        | 0        | 0 | 0 | 0        |
| 0        | 0        | 0 | 0.009139 | 0        | 0        | 0 | 0 | 0        |
| 0        | 0        | 0 | 0.01052  | 0        | 0        | 0 | 0 | 0        |

|   |          |   |          |   |          |   |   |   |
|---|----------|---|----------|---|----------|---|---|---|
| 0 | 0        | 0 | 0.029948 | 0 | 0        | 0 | 0 | 0 |
| 0 | 0        | 0 | 0.017785 | 0 | 0        | 0 | 0 | 0 |
| 0 | 0        | 0 | 0.01979  | 0 | 0        | 0 | 0 | 0 |
| 0 | 0        | 0 | 0.008219 | 0 | 0        | 0 | 0 | 0 |
| 0 | 0        | 0 | 0.003846 | 0 | 0        | 0 | 0 | 0 |
| 0 | 0        | 0 | 0.016141 | 0 | 0        | 0 | 0 | 0 |
| 0 | 0        | 0 | 0.00263  | 0 | 0        | 0 | 0 | 0 |
| 0 | 0        | 0 | 0.001907 | 0 | 0        | 0 | 0 | 0 |
| 0 | 0        | 0 | 0.004898 | 0 | 0        | 0 | 0 | 0 |
| 0 | 0        | 0 | 0.005293 | 0 | 0        | 0 | 0 | 0 |
| 0 | 0        | 0 | 0.022354 | 0 | 0        | 0 | 0 | 0 |
| 0 | 0        | 0 | 0.012821 | 0 | 0        | 0 | 0 | 0 |
| 0 | 0        | 0 | 0.053234 | 0 | 0        | 0 | 0 | 0 |
| 0 | 0.000394 | 0 | 0.014695 | 0 | 3.29E-05 | 0 | 0 | 0 |
| 0 | 0        | 0 | 0.008087 | 0 | 0        | 0 | 0 | 0 |
| 0 | 0        | 0 | 0.001545 | 0 | 0        | 0 | 0 | 0 |
| 0 | 0        | 0 | 0.006443 | 0 | 0        | 0 | 0 | 0 |
| 0 | 0        | 0 | 0.006312 | 0 | 0        | 0 | 0 | 0 |
| 0 | 0        | 0 | 0.000855 | 0 | 0        | 0 | 0 | 0 |
| 0 | 0        | 0 | 0.00766  | 0 | 0        | 0 | 0 | 0 |
| 0 | 0        | 0 | 0.023801 | 0 | 0        | 0 | 0 | 0 |
| 0 | 0        | 0 | 0.00858  | 0 | 0        | 0 | 0 | 0 |
| 0 | 0        | 0 | 0.001249 | 0 | 0        | 0 | 0 | 0 |
| 0 | 0        | 0 | 0.011572 | 0 | 0        | 0 | 0 | 0 |
| 0 | 0        | 0 | 0.00572  | 0 | 0        | 0 | 0 | 0 |
| 0 | 0        | 0 | 0.010553 | 0 | 0        | 0 | 0 | 0 |
| 0 | 0        | 0 | 0.00263  | 0 | 0        | 0 | 0 | 0 |
| 0 | 0        | 0 | 0.001381 | 0 | 0        | 0 | 0 | 0 |
| 0 | 0        | 0 | 9.86E-05 | 0 | 0        | 0 | 0 | 0 |
| 0 | 0        | 0 | 0.001216 | 0 | 0        | 0 | 0 | 0 |
| 0 | 0        | 0 | 0.001085 | 0 | 0        | 0 | 0 | 0 |
| 0 | 0        | 0 | 0.00309  | 0 | 0        | 0 | 0 | 0 |
| 0 | 0        | 0 | 0.008909 | 0 | 0        | 0 | 0 | 0 |
| 0 | 0        | 0 | 0.007956 | 0 | 0        | 0 | 0 | 0 |
| 0 | 0        | 0 | 0.007134 | 0 | 0        | 0 | 0 | 0 |
| 0 | 0        | 0 | 0.003912 | 0 | 0        | 0 | 0 | 0 |
| 0 | 0        | 0 | 0.000789 | 0 | 0        | 0 | 0 | 0 |
| 0 | 0        | 0 | 0.000493 | 0 | 0        | 0 | 0 | 0 |
| 0 | 0        | 0 | 0.007627 | 0 | 0        | 0 | 0 | 0 |
| 0 | 0        | 0 | 0.006312 | 0 | 0        | 0 | 0 | 0 |
| 0 | 0.00023  | 0 | 0.00904  | 0 | 0        | 0 | 0 | 0 |
| 0 | 9.86E-05 | 0 | 0.013511 | 0 | 0        | 0 | 0 | 0 |
| 0 | 3.29E-05 | 0 | 0.002137 | 0 | 0        | 0 | 0 | 0 |
| 0 | 0        | 0 | 0.004109 | 0 | 0        | 0 | 0 | 0 |
| 0 | 0        | 0 | 0.012098 | 0 | 0        | 0 | 0 | 0 |
| 0 | 0        | 0 | 0.017062 | 0 | 0        | 0 | 0 | 0 |
| 0 | 0        | 0 | 0.02413  | 0 | 0        | 0 | 0 | 0 |

|          |          |   |          |   |          |   |   |   |
|----------|----------|---|----------|---|----------|---|---|---|
| 0        | 0        | 0 | 0.012295 | 0 | 0        | 0 | 0 | 0 |
| 0        | 0        | 0 | 0.002794 | 0 | 0        | 0 | 0 | 0 |
| 0        | 6.57E-05 | 0 | 0.002268 | 0 | 0        | 0 | 0 | 0 |
| 0        | 0        | 0 | 0.002334 | 0 | 0        | 0 | 0 | 0 |
| 0        | 0        | 0 | 0.001183 | 0 | 0        | 0 | 0 | 0 |
| 0        | 0        | 0 | 0.005161 | 0 | 0        | 0 | 0 | 0 |
| 9.86E-05 | 0        | 0 | 0.003616 | 0 | 0        | 0 | 0 | 0 |
| 0        | 0        | 0 | 0.007232 | 0 | 0        | 0 | 0 | 0 |
| 0        | 0        | 0 | 0.009862 | 0 | 0        | 0 | 0 | 0 |
| 0        | 0.000131 | 0 | 0.009271 | 0 | 0        | 0 | 0 | 0 |
| 0        | 0        | 0 | 0.013413 | 0 | 0        | 0 | 0 | 0 |
| 0        | 0        | 0 | 0.032414 | 0 | 0        | 0 | 0 | 0 |
| 0        | 0        | 0 | 0.052862 | 0 | 3.29E-05 | 0 | 0 | 0 |
| 0        | 0        | 0 | 0.041191 | 0 | 0        | 0 | 0 | 0 |
| 0        | 0        | 0 | 0.029192 | 0 | 0        | 0 | 0 | 0 |
| 0.000131 | 0        | 0 | 0.015747 | 0 | 0        | 0 | 0 | 0 |
| 0        | 0        | 0 | 0.044051 | 0 | 0        | 0 | 0 | 0 |
| 0        | 0        | 0 | 0.018508 | 0 | 0        | 0 | 0 | 0 |
| 0        | 0        | 0 | 0.033663 | 0 | 0        | 0 | 0 | 0 |
| 0        | 0        | 0 | 0.028732 | 0 | 0        | 0 | 0 | 0 |
| 0        | 0        | 0 | 0.048851 | 0 | 0        | 0 | 0 | 0 |
| 0        | 0        | 0 | 0.125119 | 0 | 0        | 0 | 0 | 0 |
| 0        | 0        | 0 | 0.159801 | 0 | 0        | 0 | 0 | 0 |
| 0        | 0        | 0 | 0.002827 | 0 | 0        | 0 | 0 | 0 |
| 0        | 0        | 0 | 0.001841 | 0 | 0        | 0 | 0 | 0 |
| 0        | 3.29E-05 | 0 | 0.007232 | 0 | 0        | 0 | 0 | 0 |
| 0        | 0.000131 | 0 | 0.008482 | 0 | 0        | 0 | 0 | 0 |
| 0        | 0        | 0 | 0.020283 | 0 | 0        | 0 | 0 | 0 |
| 3.29E-05 | 0        | 0 | 0.024097 | 0 | 0        | 0 | 0 | 0 |
| 6.57E-05 | 0.000131 | 0 | 0.018936 | 0 | 0        | 0 | 0 | 0 |
| 0.000329 | 0.000526 | 0 | 0.029291 | 0 | 0        | 0 | 0 | 0 |
| 0        | 3.29E-05 | 0 | 0.031296 | 0 | 0        | 0 | 0 | 0 |
| 0        | 0        | 0 | 0.023045 | 0 | 0        | 0 | 0 | 0 |
| 0        | 0        | 0 | 0.01624  | 0 | 0        | 0 | 0 | 0 |
| 0        | 0        | 0 | 0.028765 | 0 | 0        | 0 | 0 | 0 |
| 0        | 3.29E-05 | 0 | 0.034617 | 0 | 0        | 0 | 0 | 0 |
| 0        | 0        | 0 | 0.044019 | 0 | 0        | 0 | 0 | 0 |
| 0        | 0.00023  | 0 | 0.011703 | 0 | 0        | 0 | 0 | 0 |
| 0        | 3.29E-05 | 0 | 0.005227 | 0 | 0        | 0 | 0 | 0 |
| 0        | 0        | 0 | 0.001282 | 0 | 0        | 0 | 0 | 0 |
| 0        | 0        | 0 | 0.004767 | 0 | 0        | 0 | 0 | 0 |
| 0        | 0        | 0 | 0.006871 | 0 | 0        | 0 | 0 | 0 |
| 0        | 0        | 0 | 0.001348 | 0 | 0        | 0 | 0 | 0 |
| 0        | 0        | 0 | 0.007988 | 0 | 0        | 0 | 0 | 0 |
| 0        | 0        | 0 | 0.012459 | 0 | 0        | 0 | 0 | 0 |
| 0        | 0        | 0 | 0.00092  | 0 | 0        | 0 | 0 | 0 |
| 0        | 0        | 0 | 0.004438 | 0 | 0        | 0 | 0 | 0 |

|          |   |   |          |   |   |   |   |   |
|----------|---|---|----------|---|---|---|---|---|
| 0        | 0 | 0 | 0.000855 | 0 | 0 | 0 | 0 | 0 |
| 0        | 0 | 0 | 0.000559 | 0 | 0 | 0 | 0 | 0 |
| 0        | 0 | 0 | 0.047503 | 0 | 0 | 0 | 0 | 0 |
| 0        | 0 | 0 | 0.000822 | 0 | 0 | 0 | 0 | 0 |
| 0        | 0 | 0 | 0.001972 | 0 | 0 | 0 | 0 | 0 |
| 0        | 0 | 0 | 0.018015 | 0 | 0 | 0 | 0 | 0 |
| 0        | 0 | 0 | 0.015878 | 0 | 0 | 0 | 0 | 0 |
| 0        | 0 | 0 | 0.021796 | 0 | 0 | 0 | 0 | 0 |
| 0        | 0 | 0 | 0.029718 | 0 | 0 | 0 | 0 | 0 |
| 0        | 0 | 0 | 0.056313 | 0 | 0 | 0 | 0 | 0 |
| 0        | 0 | 0 | 0.06256  | 0 | 0 | 0 | 0 | 0 |
| 0        | 0 | 0 | 0.016766 | 0 | 0 | 0 | 0 | 0 |
| 0        | 0 | 0 | 0.002696 | 0 | 0 | 0 | 0 | 0 |
| 0        | 0 | 0 | 0.008712 | 0 | 0 | 0 | 0 | 0 |
| 0        | 0 | 0 | 0.032118 | 0 | 0 | 0 | 0 | 0 |
| 0        | 0 | 0 | 0.051251 | 0 | 0 | 0 | 0 | 0 |
| 0        | 0 | 0 | 0.042441 | 0 | 0 | 0 | 0 | 0 |
| 0        | 0 | 0 | 0.015024 | 0 | 0 | 0 | 0 | 0 |
| 0        | 0 | 0 | 0.031493 | 0 | 0 | 0 | 0 | 0 |
| 3.29E-05 | 0 | 0 | 0.060784 | 0 | 0 | 0 | 0 | 0 |
| 0        | 0 | 0 | 0.019363 | 0 | 0 | 0 | 0 | 0 |
| 0        | 0 | 0 | 0.014432 | 0 | 0 | 0 | 0 | 0 |
| 0        | 0 | 0 | 0.002268 | 0 | 0 | 0 | 0 | 0 |
| 0        | 0 | 0 | 0.000789 | 0 | 0 | 0 | 0 | 0 |
| 0        | 0 | 0 | 0.000723 | 0 | 0 | 0 | 0 | 0 |
| 0        | 0 | 0 | 0.01361  | 0 | 0 | 0 | 0 | 0 |
| 0        | 0 | 0 | 0.013117 | 0 | 0 | 0 | 0 | 0 |
| 0        | 0 | 0 | 0.007988 | 0 | 0 | 0 | 0 | 0 |
| 0        | 0 | 0 | 0.009731 | 0 | 0 | 0 | 0 | 0 |
| 0        | 0 | 0 | 0.005326 | 0 | 0 | 0 | 0 | 0 |
| 0        | 0 | 0 | 0.010487 | 0 | 0 | 0 | 0 | 0 |
| 0        | 0 | 0 | 0.000197 | 0 | 0 | 0 | 0 | 0 |
| 0        | 0 | 0 | 0.00023  | 0 | 0 | 0 | 0 | 0 |
| 0        | 0 | 0 | 0.00355  | 0 | 0 | 0 | 0 | 0 |
| 0        | 0 | 0 | 0.005293 | 0 | 0 | 0 | 0 | 0 |
| 0        | 0 | 0 | 0.025445 | 0 | 0 | 0 | 0 | 0 |
| 0        | 0 | 0 | 0.00618  | 0 | 0 | 0 | 0 | 0 |
| 0        | 0 | 0 | 0.02482  | 0 | 0 | 0 | 0 | 0 |
| 0        | 0 | 0 | 0.007627 | 0 | 0 | 0 | 0 | 0 |
| 0        | 0 | 0 | 0.003189 | 0 | 0 | 0 | 0 | 0 |
| 0        | 0 | 0 | 0.001709 | 0 | 0 | 0 | 0 | 0 |
| 0        | 0 | 0 | 0.002564 | 0 | 0 | 0 | 0 | 0 |
| 0        | 0 | 0 | 0.056182 | 0 | 0 | 0 | 0 | 0 |
| 0        | 0 | 0 | 0.016207 | 0 | 0 | 0 | 0 | 0 |
| 0        | 0 | 0 | 0.109931 | 0 | 0 | 0 | 0 | 0 |
| 0        | 0 | 0 | 0.017982 | 0 | 0 | 0 | 0 | 0 |
| 0        | 0 | 0 | 0.035208 | 0 | 0 | 0 | 0 | 0 |



|          |          |   |          |   |          |   |          |          |
|----------|----------|---|----------|---|----------|---|----------|----------|
| 0        | 0        | 0 | 0.048391 | 0 | 0        | 0 | 0        | 0        |
| 0        | 0        | 0 | 0.012459 | 0 | 0        | 0 | 0        | 0        |
| 0        | 0        | 0 | 0.153785 | 0 | 0        | 0 | 0        | 0        |
| 0        | 0        | 0 | 0.001808 | 0 | 0        | 0 | 0        | 0        |
| 0.000131 | 0        | 0 | 0.007167 | 0 | 0        | 0 | 0        | 0.000296 |
| 0        | 0        | 0 | 0.015681 | 0 | 0        | 0 | 0        | 0.000197 |
| 6.57E-05 | 0        | 0 | 0.018377 | 0 | 0        | 0 | 0        | 0        |
| 0        | 0        | 0 | 0.002433 | 0 | 0        | 0 | 0        | 0        |
| 0        | 6.57E-05 | 0 | 0.008843 | 0 | 0        | 0 | 0        | 0.001019 |
| 0        | 0.002071 | 0 | 0.017982 | 0 | 0        | 0 | 0        | 0.000756 |
| 0.002104 | 0        | 0 | 0.004175 | 0 | 0        | 0 | 0        | 0.006969 |
| 0        | 0        | 0 | 0.00881  | 0 | 0        | 0 | 0        | 0.00023  |
| 0        | 0        | 0 | 0.005391 | 0 | 0        | 0 | 0        | 0.003156 |
| 9.86E-05 | 0        | 0 | 0.007265 | 0 | 0        | 0 | 0        | 0.001414 |
| 0        | 0        | 0 | 0.014235 | 0 | 0        | 0 | 0        | 0        |
| 0        | 0        | 0 | 0.014958 | 0 | 0        | 0 | 0        | 0        |
| 0        | 0        | 0 | 0.012065 | 0 | 0        | 0 | 0        | 0        |
| 0        | 0        | 0 | 0.006509 | 0 | 0        | 0 | 0        | 0        |
| 0        | 0        | 0 | 0.012196 | 0 | 0        | 0 | 0        | 0        |
| 0        | 0        | 0 | 0.013413 | 0 | 0        | 0 | 0        | 0        |
| 0        | 0        | 0 | 0.023768 | 0 | 0        | 0 | 0        | 0        |
| 0        | 0        | 0 | 0.004405 | 0 | 0        | 0 | 0        | 0        |
| 0        | 0        | 0 | 0.003255 | 0 | 0        | 0 | 0        | 0        |
| 0        | 0        | 0 | 0.01121  | 0 | 0        | 0 | 0        | 0.000164 |
| 0        | 0        | 0 | 0.001249 | 0 | 0        | 0 | 0        | 0        |
| 0        | 0        | 0 | 0.000822 | 0 | 0        | 0 | 0        | 0        |
| 0        | 0        | 0 | 0.000131 | 0 | 0        | 0 | 0        | 0        |
| 0        | 0        | 0 | 0.000164 | 0 | 0        | 0 | 0        | 0        |
| 0        | 0        | 0 | 0.010618 | 0 | 0        | 0 | 0        | 0        |
| 0        | 0        | 0 | 0.000526 | 0 | 0        | 0 | 0        | 0        |
| 0        | 0        | 0 | 0.001151 | 0 | 0        | 0 | 0        | 0        |
| 0        | 0        | 0 | 0.002729 | 0 | 0        | 0 | 0        | 0        |
| 0        | 0        | 0 | 0.066472 | 0 | 0        | 0 | 0        | 0        |
| 0        | 0        | 0 | 0.014892 | 0 | 0        | 0 | 0        | 0        |
| 0        | 0        | 0 | 0.031888 | 0 | 0        | 0 | 0        | 0        |
| 0        | 0        | 0 | 0.02551  | 0 | 0        | 0 | 0        | 0        |
| 0        | 0        | 0 | 0.026102 | 0 | 0        | 0 | 0        | 0        |
| 0        | 0        | 0 | 0.015319 | 0 | 0        | 0 | 0        | 0        |
| 0.000131 | 0        | 0 | 0.014728 | 0 | 0        | 0 | 0        | 0        |
| 0        | 0        | 0 | 0.010158 | 0 | 0        | 0 | 3.29E-05 | 0        |
| 0        | 0        | 0 | 0.027286 | 0 | 0        | 0 | 0        | 0        |
| 0        | 0        | 0 | 0.003781 | 0 | 3.29E-05 | 0 | 0        | 3.29E-05 |
| 0        | 0        | 0 | 0.01624  | 0 | 0        | 0 | 3.29E-05 | 0        |
| 0        | 0        | 0 | 0.001841 | 0 | 0        | 0 | 0        | 0        |
| 0        | 0        | 0 | 0.001808 | 0 | 0        | 0 | 0        | 0        |
| 0        | 0        | 0 | 0.004142 | 0 | 0        | 0 | 0        | 0        |
| 0        | 0.00023  | 0 | 0.001085 | 0 | 0        | 0 | 0        | 0        |

|          |          |   |          |   |          |          |   |          |
|----------|----------|---|----------|---|----------|----------|---|----------|
| 0        | 0        | 0 | 0.034715 | 0 | 0        | 0        | 0 | 0        |
| 0        | 0        | 0 | 0.006641 | 0 | 0        | 0        | 0 | 0        |
| 0        | 0        | 0 | 0.015221 | 0 | 0        | 0        | 0 | 0        |
| 0        | 0        | 0 | 0.009205 | 0 | 0        | 0        | 0 | 0        |
| 0        | 0        | 0 | 0.010257 | 0 | 0        | 0        | 0 | 0        |
| 0        | 0        | 0 | 0.012163 | 0 | 0        | 0        | 0 | 0        |
| 0        | 0        | 0 | 0.006706 | 0 | 0        | 0        | 0 | 0        |
| 0        | 0        | 0 | 0.023571 | 0 | 0        | 0        | 0 | 0        |
| 0        | 0        | 0 | 0.001677 | 0 | 0        | 0        | 0 | 0        |
| 0        | 0        | 0 | 0.011605 | 0 | 0        | 0        | 0 | 0        |
| 0        | 0        | 0 | 0.004011 | 0 | 0        | 0        | 0 | 0        |
| 0        | 0        | 0 | 0.006147 | 0 | 0        | 0        | 0 | 0        |
| 0        | 3.29E-05 | 0 | 0.040797 | 0 | 0        | 0        | 0 | 0        |
| 0        | 0        | 0 | 0.072488 | 0 | 0        | 0        | 0 | 0        |
| 0        | 0        | 0 | 0.001381 | 0 | 0        | 0        | 0 | 0        |
| 3.29E-05 | 0        | 0 | 0.00743  | 0 | 0        | 0        | 0 | 0        |
| 0        | 0        | 0 | 0.002959 | 0 | 0        | 0        | 0 | 0        |
| 0        | 0        | 0 | 0.000625 | 0 | 0        | 0        | 0 | 0        |
| 0        | 0        | 0 | 0.005161 | 0 | 0        | 0        | 0 | 0        |
| 0        | 0        | 0 | 0.006772 | 0 | 0        | 0        | 0 | 0        |
| 0        | 0        | 0 | 0.001972 | 0 | 0        | 0        | 0 | 0        |
| 0        | 0        | 0 | 0.004964 | 0 | 0        | 0        | 0 | 0        |
| 0        | 0        | 0 | 0.009139 | 0 | 0        | 0        | 0 | 0        |
| 0        | 0        | 0 | 0.003024 | 0 | 0        | 0        | 0 | 0        |
| 0        | 0        | 0 | 0.000164 | 0 | 0        | 0        | 0 | 0        |
| 0        | 0        | 0 | 0.000394 | 0 | 0        | 0        | 0 | 0        |
| 0        | 0        | 0 | 0.000493 | 0 | 0        | 0        | 0 | 0        |
| 0        | 0        | 0 | 0.004307 | 0 | 0        | 0        | 0 | 0        |
| 0        | 0        | 0 | 0.004734 | 0 | 0        | 0        | 0 | 0        |
| 0        | 0        | 0 | 0.001118 | 0 | 0        | 0        | 0 | 0        |
| 0        | 0        | 0 | 0.000131 | 0 | 0        | 0        | 0 | 0        |
| 0        | 0        | 0 | 0.000131 | 0 | 0        | 0        | 0 | 0        |
| 0        | 0        | 0 | 0.005063 | 0 | 0        | 0        | 0 | 0        |
| 0        | 0        | 0 | 0.001775 | 0 | 0        | 0        | 0 | 6.57E-05 |
| 0        | 0        | 0 | 0.00046  | 0 | 0        | 0        | 0 | 0        |
| 0        | 0        | 0 | 0.001085 | 0 | 0        | 0        | 0 | 0        |
| 3.29E-05 | 3.29E-05 | 0 | 0.012196 | 0 | 0        | 0        | 0 | 0        |
| 0        | 0        | 0 | 0.000822 | 0 | 3.29E-05 | 0        | 0 | 0        |
| 0        | 0        | 0 | 0.053355 | 0 | 0        | 0        | 0 | 0        |
| 0        | 0        | 0 | 0.012032 | 0 | 0        | 0        | 0 | 0        |
| 3.29E-05 | 0        | 0 | 0.014037 | 0 | 0        | 0        | 0 | 0        |
| 0        | 0        | 0 | 0.046846 | 0 | 0        | 0        | 0 | 0        |
| 0        | 0        | 0 | 0.015122 | 0 | 6.57E-05 | 0        | 0 | 0        |
| 0        | 0        | 0 | 0.031855 | 0 | 0        | 3.29E-05 | 0 | 0        |
| 0        | 0        | 0 | 0.01933  | 0 | 0        | 0        | 0 | 0        |
| 0        | 3.29E-05 | 0 | 0.019001 | 0 | 0        | 0        | 0 | 0        |
| 0        | 0        | 0 | 0.001479 | 0 | 0        | 0        | 0 | 0        |

|          |          |   |          |   |          |   |   |          |
|----------|----------|---|----------|---|----------|---|---|----------|
| 0        | 0        | 0 | 0.006673 | 0 | 0        | 0 | 0 | 0        |
| 0        | 0        | 0 | 0.01979  | 0 | 0        | 0 | 0 | 0        |
| 0        | 0        | 0 | 0.004274 | 0 | 0        | 0 | 0 | 0        |
| 0        | 0        | 0 | 0.015977 | 0 | 0        | 0 | 0 | 0        |
| 0        | 0        | 0 | 0.022256 | 0 | 0        | 0 | 0 | 0        |
| 0        | 3.29E-05 | 0 | 0.027516 | 0 | 0        | 0 | 0 | 0        |
| 0        | 0        | 0 | 0.016864 | 0 | 0        | 0 | 0 | 0        |
| 0        | 0        | 0 | 0.022913 | 0 | 0        | 0 | 0 | 0        |
| 0        | 0        | 0 | 0.022519 | 0 | 0        | 0 | 0 | 0        |
| 0        | 0        | 0 | 0.016437 | 0 | 0        | 0 | 0 | 0        |
| 0        | 0        | 0 | 0.023111 | 0 | 0        | 0 | 0 | 0        |
| 0        | 0        | 0 | 0.003945 | 0 | 0        | 0 | 0 | 0        |
| 0        | 0        | 0 | 0.020711 | 0 | 0        | 0 | 0 | 0        |
| 0        | 3.29E-05 | 0 | 0.020349 | 0 | 0        | 0 | 0 | 0        |
| 0        | 0        | 0 | 0.010454 | 0 | 0        | 0 | 0 | 0        |
| 0        | 3.29E-05 | 0 | 0.001216 | 0 | 0        | 0 | 0 | 0        |
| 0        | 0        | 0 | 0.010585 | 0 | 0        | 0 | 0 | 0        |
| 0        | 0        | 0 | 0.020908 | 0 | 0        | 0 | 0 | 0        |
| 0        | 0        | 0 | 0.023669 | 0 | 0        | 0 | 0 | 0        |
| 0        | 3.29E-05 | 0 | 0.122226 | 0 | 0        | 0 | 0 | 0        |
| 0        | 0        | 0 | 0.007331 | 0 | 0        | 0 | 0 | 0        |
| 0        | 0        | 0 | 0.020678 | 0 | 0        | 0 | 0 | 0        |
| 0        | 0        | 0 | 0.014202 | 0 | 0        | 0 | 0 | 0        |
| 0        | 0        | 0 | 0.008153 | 0 | 0        | 0 | 0 | 0        |
| 0        | 0        | 0 | 0.013413 | 0 | 0        | 0 | 0 | 0        |
| 0        | 0        | 0 | 0.011736 | 0 | 0        | 0 | 0 | 0        |
| 0        | 0        | 0 | 0.004438 | 0 | 0        | 0 | 0 | 0        |
| 0        | 0        | 0 | 0.003287 | 0 | 0        | 0 | 0 | 0        |
| 0        | 0        | 0 | 0.002301 | 0 | 0        | 0 | 0 | 0        |
| 0        | 0        | 0 | 0.000888 | 0 | 0        | 0 | 0 | 0        |
| 0        | 0        | 0 | 0.000756 | 0 | 0        | 0 | 0 | 0        |
| 0        | 6.57E-05 | 0 | 0.001907 | 0 | 0        | 0 | 0 | 0        |
| 0        | 3.29E-05 | 0 | 0.006476 | 0 | 0        | 0 | 0 | 0        |
| 0        | 0        | 0 | 0.002104 | 0 | 0        | 0 | 0 | 0        |
| 0        | 0        | 0 | 0.004964 | 0 | 0        | 0 | 0 | 0        |
| 0        | 3.29E-05 | 0 | 0.003583 | 0 | 0        | 0 | 0 | 0        |
| 0        | 0        | 0 | 0.018837 | 0 | 3.29E-05 | 0 | 0 | 3.29E-05 |
| 6.57E-05 | 6.57E-05 | 0 | 0.008186 | 0 | 0        | 0 | 0 | 0        |
| 0        | 0        | 0 | 0.011374 | 0 | 0        | 0 | 0 | 0        |
| 0.001644 | 0.004471 | 0 | 0.026266 | 0 | 0        | 0 | 0 | 0        |
| 0.000131 | 0.000362 | 0 | 0.034748 | 0 | 0        | 0 | 0 | 0        |
| 6.57E-05 | 6.57E-05 | 0 | 0.105428 | 0 | 0        | 0 | 0 | 0        |
| 9.86E-05 | 0.00046  | 0 | 0.013577 | 0 | 0        | 0 | 0 | 0        |
| 3.29E-05 | 0        | 0 | 0.009172 | 0 | 0        | 0 | 0 | 0        |
| 0        | 0        | 0 | 0.009928 | 0 | 0        | 0 | 0 | 0        |
| 0.003255 | 0.014235 | 0 | 0.026858 | 0 | 0        | 0 | 0 | 0        |
| 0.001118 | 0.001085 | 0 | 0.025609 | 0 | 0        | 0 | 0 | 6.57E-05 |

|          |          |          |          |   |         |   |   |          |
|----------|----------|----------|----------|---|---------|---|---|----------|
| 0.002696 | 0.002696 | 0        | 0.037049 | 0 | 0       | 0 | 0 | 0        |
| 3.29E-05 | 0        | 0        | 0.012295 | 0 | 0       | 0 | 0 | 0        |
| 0.000723 | 0.000657 | 0        | 0.143299 | 0 | 0       | 0 | 0 | 0        |
| 0        | 0        | 0        | 0.000263 | 0 | 0       | 0 | 0 | 0        |
| 0        | 0        | 0        | 0.004208 | 0 | 0       | 0 | 0 | 0        |
| 0        | 0        | 0        | 3.29E-05 | 0 | 0       | 0 | 0 | 0        |
| 0        | 0        | 0        | 0.001151 | 0 | 0       | 0 | 0 | 0        |
| 0        | 0        | 0        | 3.29E-05 | 0 | 0       | 0 | 0 | 0        |
| 0        | 0        | 0        | 0.000296 | 0 | 0       | 0 | 0 | 0        |
| 0        | 0        | 0        | 0.004307 | 0 | 0       | 0 | 0 | 0        |
| 0        | 0        | 0        | 0.001972 | 0 | 0       | 0 | 0 | 0        |
| 0        | 0        | 0        | 0.007495 | 0 | 0       | 0 | 0 | 0        |
| 0        | 0        | 0        | 0.001183 | 0 | 0       | 0 | 0 | 0        |
| 0        | 0        | 0        | 0.000329 | 0 | 0       | 0 | 0 | 0        |
| 0        | 0        | 0        | 0.006936 | 0 | 0       | 0 | 0 | 0        |
| 0        | 0        | 0        | 0.031    | 0 | 0       | 0 | 0 | 0        |
| 0        | 0        | 0        | 0.001315 | 0 | 0       | 0 | 0 | 0        |
| 6.57E-05 | 3.29E-05 | 0        | 0.028502 | 0 | 0       | 0 | 0 | 0        |
| 0        | 0        | 0        | 0.022848 | 0 | 0       | 0 | 0 | 0        |
| 0        | 0        | 0        | 0.049476 | 0 | 0       | 0 | 0 | 0        |
| 0        | 0        | 0        | 0.057267 | 0 | 0       | 0 | 0 | 0        |
| 0        | 0        | 0        | 0.04964  | 0 | 0       | 0 | 0 | 0        |
| 0        | 0        | 0        | 0.013281 | 0 | 0       | 0 | 0 | 0        |
| 0        | 0        | 0        | 0.014267 | 0 | 0       | 0 | 0 | 3.29E-05 |
| 0        | 0        | 0        | 0.021664 | 0 | 0       | 0 | 0 | 0        |
| 0        | 0        | 0        | 0.012887 | 0 | 0       | 0 | 0 | 0        |
| 0        | 3.29E-05 | 0        | 0.005917 | 0 | 0       | 0 | 0 | 0        |
| 0        | 0        | 0        | 0.002005 | 0 | 0       | 0 | 0 | 0        |
| 0        | 0        | 0        | 0.000756 | 0 | 0       | 0 | 0 | 0        |
| 0        | 0        | 0        | 0.006936 | 0 | 0       | 0 | 0 | 0        |
| 0        | 6.57E-05 | 0        | 0.004898 | 0 | 0       | 0 | 0 | 0        |
| 0        | 0        | 0        | 0.002367 | 0 | 0       | 0 | 0 | 0        |
| 0        | 0        | 0        | 0.009501 | 0 | 0       | 0 | 0 | 0        |
| 0        | 0        | 0        | 0.000789 | 0 | 0       | 0 | 0 | 0        |
| 0        | 0        | 0        | 0.002564 | 0 | 0       | 0 | 0 | 0        |
| 0        | 0        | 0        | 0.010388 | 0 | 0       | 0 | 0 | 0        |
| 0        | 0        | 0        | 0.005391 | 0 | 0       | 0 | 0 | 0        |
| 3.29E-05 | 0.000822 | 0        | 0.015056 | 0 | 0       | 0 | 0 | 0        |
| 0        | 0        | 6.57E-05 | 0.007298 | 0 | 0       | 0 | 0 | 0        |
| 0        | 0        | 0        | 0.022124 | 0 | 0       | 0 | 0 | 0        |
| 0        | 0        | 0        | 0.048752 | 0 | 0       | 0 | 0 | 0        |
| 0        | 0        | 0        | 0.01887  | 0 | 0       | 0 | 0 | 0        |
| 0        | 0        | 0        | 0.075709 | 0 | 0       | 0 | 0 | 0        |
| 3.29E-05 | 0.001381 | 0        | 0.029028 | 0 | 0.00023 | 0 | 0 | 0.00023  |
| 0        | 0.000197 | 0        | 0.01956  | 0 | 0       | 0 | 0 | 0        |
| 0        | 0        | 0        | 0.011703 | 0 | 0       | 0 | 0 | 0        |
| 0        | 0        | 0        | 0.045761 | 0 | 0       | 0 | 0 | 0        |

|          |          |   |          |   |          |   |   |   |
|----------|----------|---|----------|---|----------|---|---|---|
| 0.000197 | 0        | 0 | 0.013084 | 0 | 0        | 0 | 0 | 0 |
| 0        | 0        | 0 | 0.036655 | 0 | 6.57E-05 | 0 | 0 | 0 |
| 0        | 0        | 0 | 0.001282 | 0 | 0        | 0 | 0 | 0 |
| 0        | 0        | 0 | 0.101253 | 0 | 0        | 0 | 0 | 0 |
| 6.57E-05 | 0        | 0 | 0.0143   | 0 | 3.29E-05 | 0 | 0 | 0 |
| 0        | 0        | 0 | 0.002696 | 0 | 0        | 0 | 0 | 0 |
| 0        | 0        | 0 | 0.008777 | 0 | 0        | 0 | 0 | 0 |
| 0        | 0        | 0 | 0.001348 | 0 | 0        | 0 | 0 | 0 |
| 0        | 0        | 0 | 0.012689 | 0 | 0        | 0 | 0 | 0 |
| 0        | 0        | 0 | 0.000526 | 0 | 0        | 0 | 0 | 0 |
| 0        | 0        | 0 | 0.005063 | 0 | 0        | 0 | 0 | 0 |
| 0        | 0        | 0 | 3.29E-05 | 0 | 0        | 0 | 0 | 0 |
| 0        | 0        | 0 | 0.006213 | 0 | 0        | 0 | 0 | 0 |
| 0.000263 | 0.000329 | 0 | 0.004274 | 0 | 0        | 0 | 0 | 0 |
| 0        | 0        | 0 | 0.019527 | 0 | 0        | 0 | 0 | 0 |
| 6.57E-05 | 0        | 0 | 0.005358 | 0 | 0        | 0 | 0 | 0 |
| 0        | 3.29E-05 | 0 | 0.014202 | 0 | 0        | 0 | 0 | 0 |
| 0.000394 | 0.000197 | 0 | 0.011736 | 0 | 0        | 0 | 0 | 0 |
| 0.000197 | 0        | 0 | 0.006969 | 0 | 0        | 0 | 0 | 0 |
| 0.000131 | 0.00023  | 0 | 0.001315 | 0 | 0        | 0 | 0 | 0 |
| 0        | 0        | 0 | 0.004701 | 0 | 0        | 0 | 0 | 0 |
| 0.000625 | 0.00046  | 0 | 0.013873 | 0 | 0        | 0 | 0 | 0 |
| 3.29E-05 | 0        | 0 | 0.004734 | 0 | 0        | 0 | 0 | 0 |
| 0.000197 | 0.000131 | 0 | 0.020842 | 0 | 0        | 0 | 0 | 0 |
| 0        | 6.57E-05 | 0 | 0.019922 | 0 | 0        | 0 | 0 | 0 |
| 0        | 0        | 0 | 0.005589 | 0 | 0        | 0 | 0 | 0 |
| 0        | 0.00046  | 0 | 0.035668 | 0 | 0        | 0 | 0 | 0 |
| 0        | 0        | 0 | 0.005063 | 0 | 0        | 0 | 0 | 0 |
| 0        | 0        | 0 | 0.002761 | 0 | 0        | 0 | 0 | 0 |
| 0        | 6.57E-05 | 0 | 0.005786 | 0 | 0        | 0 | 0 | 0 |
| 0        | 0        | 0 | 0.026398 | 0 | 0        | 0 | 0 | 0 |
| 0        | 0        | 0 | 0.012689 | 0 | 0        | 0 | 0 | 0 |
| 0        | 0        | 0 | 0.003386 | 0 | 0        | 0 | 0 | 0 |
| 0        | 0        | 0 | 0.018377 | 0 | 0        | 0 | 0 | 0 |
| 0        | 0        | 0 | 0.037345 | 0 | 0        | 0 | 0 | 0 |
| 0        | 0        | 0 | 0.006739 | 0 | 0        | 0 | 0 | 0 |
| 0        | 0        | 0 | 0.015845 | 0 | 0        | 0 | 0 | 0 |
| 0        | 0        | 0 | 0.001644 | 0 | 0        | 0 | 0 | 0 |
| 0        | 0        | 0 | 0.00069  | 0 | 0        | 0 | 0 | 0 |
| 0        | 0        | 0 | 0.000263 | 0 | 0        | 0 | 0 | 0 |
| 0        | 0        | 0 | 0.010191 | 0 | 0        | 0 | 0 | 0 |
| 0        | 0        | 0 | 0.000164 | 0 | 0        | 0 | 0 | 0 |
| 0        | 0        | 0 | 0.000329 | 0 | 0        | 0 | 0 | 0 |
| 0        | 0        | 0 | 0.000723 | 0 | 0        | 0 | 0 | 0 |
| 0        | 0        | 0 | 0.000329 | 0 | 0        | 0 | 0 | 0 |
| 0        | 0        | 0 | 0.009698 | 0 | 0        | 0 | 0 | 0 |
| 0        | 0        | 0 | 0.002926 | 0 | 0        | 0 | 0 | 0 |

|          |          |   |          |   |          |   |   |          |
|----------|----------|---|----------|---|----------|---|---|----------|
| 0        | 0        | 0 | 0.0119   | 0 | 0        | 0 | 0 | 0        |
| 0        | 0        | 0 | 0.005161 | 0 | 0        | 0 | 0 | 0        |
| 0        | 0        | 0 | 0.001611 | 0 | 0        | 0 | 0 | 0        |
| 0        | 0        | 0 | 0.000756 | 0 | 0        | 0 | 0 | 0        |
| 0        | 0        | 0 | 0.011079 | 0 | 0        | 0 | 0 | 0        |
| 0        | 0        | 0 | 0.004438 | 0 | 0        | 0 | 0 | 0        |
| 0        | 0        | 0 | 0.031362 | 0 | 0        | 0 | 0 | 0        |
| 0.000197 | 6.57E-05 | 0 | 0.029751 | 0 | 3.29E-05 | 0 | 0 | 0        |
| 0.000164 | 0        | 0 | 0.063809 | 0 | 0        | 0 | 0 | 0        |
| 3.29E-05 | 0        | 0 | 0.008745 | 0 | 0        | 0 | 0 | 0        |
| 0        | 0        | 0 | 0.125678 | 0 | 0        | 0 | 0 | 0        |
| 0        | 9.86E-05 | 0 | 0.076005 | 0 | 0        | 0 | 0 | 0        |
| 0        | 0        | 0 | 0.157763 | 0 | 0        | 0 | 0 | 0        |
| 3.29E-05 | 0        | 0 | 0.086854 | 0 | 0        | 0 | 0 | 0        |
| 0        | 0        | 0 | 0.013906 | 0 | 0        | 0 | 0 | 0        |
| 0.00023  | 0.000164 | 0 | 0.090108 | 0 | 0        | 0 | 0 | 0        |
| 0        | 0        | 0 | 0.049015 | 0 | 0        | 0 | 0 | 0        |
| 0        | 0        | 0 | 0.024163 | 0 | 0        | 0 | 0 | 0        |
| 6.57E-05 | 0        | 0 | 0.041389 | 0 | 0        | 0 | 0 | 0        |
| 0        | 0        | 0 | 0.005753 | 0 | 0.000131 | 0 | 0 | 0        |
| 0        | 0        | 0 | 0.007101 | 0 | 6.57E-05 | 0 | 0 | 0        |
| 0        | 0        | 0 | 0.003353 | 0 | 0        | 0 | 0 | 0        |
| 3.29E-05 | 0        | 0 | 0.015582 | 0 | 0        | 0 | 0 | 0        |
| 0        | 0        | 0 | 0.014498 | 0 | 0        | 0 | 0 | 0        |
| 0        | 0        | 0 | 0.003912 | 0 | 0        | 0 | 0 | 0        |
| 0        | 0        | 0 | 0.009172 | 0 | 0        | 0 | 0 | 0        |
| 0        | 3.29E-05 | 0 | 0.057727 | 0 | 0        | 0 | 0 | 3.29E-05 |
| 0        | 0        | 0 | 0.008186 | 0 | 0        | 0 | 0 | 0        |
| 0        | 0        | 0 | 0.010027 | 0 | 0        | 0 | 0 | 0        |
| 0        | 0        | 0 | 0.02173  | 0 | 0        | 0 | 0 | 0        |
| 0        | 0        | 0 | 0.010454 | 0 | 0        | 0 | 0 | 0        |
| 0        | 0        | 0 | 0.018673 | 0 | 0        | 0 | 0 | 0        |
| 0        | 3.29E-05 | 0 | 0.004175 | 0 | 0        | 0 | 0 | 0        |
| 0        | 0        | 0 | 0.004339 | 0 | 0        | 0 | 0 | 0        |
| 0        | 0        | 0 | 0.01052  | 0 | 0        | 0 | 0 | 0        |
| 0        | 0        | 0 | 0.003583 | 0 | 0        | 0 | 0 | 0        |
| 0        | 0        | 0 | 0.004011 | 0 | 0        | 0 | 0 | 0        |
| 0        | 0        | 0 | 0.017949 | 0 | 0        | 0 | 0 | 0        |
| 0        | 0        | 0 | 0.031954 | 0 | 0.00023  | 0 | 0 | 0        |
| 0        | 0        | 0 | 0.064401 | 0 | 0.000197 | 0 | 0 | 0        |
| 0        | 0        | 0 | 0.027121 | 0 | 0        | 0 | 0 | 0        |
| 3.29E-05 | 0        | 0 | 0.0048   | 0 | 0        | 0 | 0 | 0        |
| 0        | 6.57E-05 | 0 | 0.015648 | 0 | 0        | 0 | 0 | 0        |
| 0        | 0        | 0 | 0.006608 | 0 | 0        | 0 | 0 | 0        |
| 0        | 0        | 0 | 0.009961 | 0 | 0        | 0 | 0 | 0        |
| 0        | 0        | 0 | 0.005227 | 0 | 0        | 0 | 0 | 0        |
| 0        | 0        | 0 | 0.000263 | 0 | 0        | 0 | 0 | 0        |

|          |          |   |          |   |          |   |   |   |
|----------|----------|---|----------|---|----------|---|---|---|
| 0        | 0        | 0 | 0.001611 | 0 | 0        | 0 | 0 | 0 |
| 0        | 0        | 0 | 0.008219 | 0 | 0        | 0 | 0 | 0 |
| 0        | 0        | 0 | 0.010881 | 0 | 0        | 0 | 0 | 0 |
| 0        | 0        | 0 | 0.023374 | 0 | 0        | 0 | 0 | 0 |
| 0        | 0        | 0 | 0.009632 | 0 | 0        | 0 | 0 | 0 |
| 0        | 0        | 0 | 0.012591 | 0 | 0        | 0 | 0 | 0 |
| 0        | 3.29E-05 | 0 | 0.01006  | 0 | 0        | 0 | 0 | 0 |
| 0        | 0        | 0 | 0.004504 | 0 | 0        | 0 | 0 | 0 |
| 0        | 0        | 0 | 0.002005 | 0 | 0        | 0 | 0 | 0 |
| 0        | 0        | 0 | 0.007693 | 0 | 0        | 0 | 0 | 0 |
| 3.29E-05 | 0        | 0 | 0.025872 | 0 | 0        | 0 | 0 | 0 |
| 0        | 0        | 0 | 0.017916 | 0 | 0        | 0 | 0 | 0 |
| 0        | 0        | 0 | 0.004602 | 0 | 0        | 0 | 0 | 0 |
| 0        | 0        | 0 | 0.001644 | 0 | 0        | 0 | 0 | 0 |
| 0        | 0        | 0 | 0.002071 | 0 | 0        | 0 | 0 | 0 |
| 0        | 0        | 0 | 0.003386 | 0 | 0        | 0 | 0 | 0 |
| 0        | 3.29E-05 | 0 | 0.000329 | 0 | 0        | 0 | 0 | 0 |
| 0        | 0        | 0 | 0.004274 | 0 | 0        | 0 | 0 | 0 |
| 0        | 0        | 0 | 0.006706 | 0 | 0        | 0 | 0 | 0 |
| 0        | 0        | 0 | 0.003353 | 0 | 0        | 0 | 0 | 0 |
| 0        | 0        | 0 | 0.001414 | 0 | 0        | 0 | 0 | 0 |
| 0        | 0        | 0 | 0.004833 | 0 | 0        | 0 | 0 | 0 |
| 0        | 0        | 0 | 0.005457 | 0 | 0        | 0 | 0 | 0 |
| 0        | 0        | 0 | 0.002531 | 0 | 0        | 0 | 0 | 0 |
| 0        | 0        | 0 | 0.00789  | 0 | 0        | 0 | 0 | 0 |
| 0        | 0        | 0 | 0.019067 | 0 | 0        | 0 | 0 | 0 |
| 0        | 0        | 0 | 0.007627 | 0 | 0        | 0 | 0 | 0 |
| 0        | 0        | 0 | 0.000296 | 0 | 0        | 0 | 0 | 0 |
| 0        | 0        | 0 | 0.001249 | 0 | 0        | 0 | 0 | 0 |
| 0        | 0        | 0 | 0.000197 | 0 | 0        | 0 | 0 | 0 |
| 0        | 0        | 0 | 9.86E-05 | 0 | 0        | 0 | 0 | 0 |
| 6.57E-05 | 0        | 0 | 9.86E-05 | 0 | 0        | 0 | 0 | 0 |
| 0        | 6.57E-05 | 0 | 3.29E-05 | 0 | 0        | 0 | 0 | 0 |
| 0        | 0        | 0 | 6.57E-05 | 0 | 0        | 0 | 0 | 0 |
| 0        | 0        | 0 | 0.000197 | 0 | 0        | 0 | 0 | 0 |
| 0        | 0        | 0 | 0.021565 | 0 | 0        | 0 | 0 | 0 |
| 0        | 0        | 0 | 0.004274 | 0 | 0        | 0 | 0 | 0 |
| 0        | 3.29E-05 | 0 | 0.056839 | 0 | 0        | 0 | 0 | 0 |
| 0        | 0.00023  | 0 | 0.00457  | 0 | 6.57E-05 | 0 | 0 | 0 |
| 0        | 3.29E-05 | 0 | 0.037411 | 0 | 0        | 0 | 0 | 0 |
| 0        | 0        | 0 | 0.040665 | 0 | 0        | 0 | 0 | 0 |
| 0        | 0        | 0 | 0.06897  | 0 | 0        | 0 | 0 | 0 |
| 0        | 0        | 0 | 0.081594 | 0 | 0        | 0 | 0 | 0 |
| 0        | 0        | 0 | 0.016897 | 0 | 0        | 0 | 0 | 0 |
| 0        | 6.57E-05 | 0 | 0.007495 | 0 | 0        | 0 | 0 | 0 |
| 0        | 0        | 0 | 0.003287 | 0 | 0        | 0 | 0 | 0 |
| 0        | 0        | 0 | 0.004898 | 0 | 0        | 0 | 0 | 0 |

|          |          |   |          |   |   |   |   |          |
|----------|----------|---|----------|---|---|---|---|----------|
| 0        | 0        | 0 | 0.012788 | 0 | 0 | 0 | 0 | 0        |
| 0        | 0        | 0 | 0.013084 | 0 | 0 | 0 | 0 | 0        |
| 0        | 0        | 0 | 0.013709 | 0 | 0 | 0 | 0 | 0        |
| 0        | 0        | 0 | 0.078273 | 0 | 0 | 0 | 0 | 0        |
| 0        | 0        | 0 | 0.0048   | 0 | 0 | 0 | 0 | 0        |
| 9.86E-05 | 3.29E-05 | 0 | 0.004898 | 0 | 0 | 0 | 0 | 0        |
| 0        | 0        | 0 | 0.008284 | 0 | 0 | 0 | 0 | 0        |
| 0        | 0.000131 | 0 | 0.014399 | 0 | 0 | 0 | 0 | 0        |
| 0        | 9.86E-05 | 0 | 0.01578  | 0 | 0 | 0 | 0 | 0        |
| 9.86E-05 | 3.29E-05 | 0 | 0.018278 | 0 | 0 | 0 | 0 | 0        |
| 0        | 3.29E-05 | 0 | 0.010947 | 0 | 0 | 0 | 0 | 0.000296 |
| 0        | 0        | 0 | 0.108518 | 0 | 0 | 0 | 0 | 0        |
| 0        | 0        | 0 | 0.000888 | 0 | 0 | 0 | 0 | 0        |
| 0        | 0        | 0 | 0.002203 | 0 | 0 | 0 | 0 | 0        |
| 0        | 0        | 0 | 0.0024   | 0 | 0 | 0 | 0 | 0        |
| 0        | 0        | 0 | 0.001742 | 0 | 0 | 0 | 0 | 0        |
| 0        | 0        | 0 | 0.00046  | 0 | 0 | 0 | 0 | 0        |
| 0        | 0        | 0 | 0.010158 | 0 | 0 | 0 | 0 | 0        |
| 0        | 0        | 0 | 0.003123 | 0 | 0 | 0 | 0 | 0        |
| 0        | 0        | 0 | 0.001742 | 0 | 0 | 0 | 0 | 0        |
| 0        | 0        | 0 | 0.003846 | 0 | 0 | 0 | 0 | 0        |
| 0        | 0        | 0 | 0.005556 | 0 | 0 | 0 | 0 | 0        |
| 0        | 0        | 0 | 0.00217  | 0 | 0 | 0 | 0 | 0        |

































|   |   |   |   |   |   |          |          |          |
|---|---|---|---|---|---|----------|----------|----------|
| 0 | 0 | 0 | 0 | 0 | 0 | 0        | 0        | 0        |
| 0 | 0 | 0 | 0 | 0 | 0 | 0        | 0.000164 | 6.57E-05 |
| 0 | 0 | 0 | 0 | 0 | 0 | 0        | 3.29E-05 | 0        |
| 0 | 0 | 0 | 0 | 0 | 0 | 0        | 0.000131 | 0.001249 |
| 0 | 0 | 0 | 0 | 0 | 0 | 0        | 0.000296 | 9.86E-05 |
| 0 | 0 | 0 | 0 | 0 | 0 | 0        | 0        | 3.29E-05 |
| 0 | 0 | 0 | 0 | 0 | 0 | 0        | 0        | 0        |
| 0 | 0 | 0 | 0 | 0 | 0 | 0        | 0.000164 | 0.000427 |
| 0 | 0 | 0 | 0 | 0 | 0 | 0        | 0        | 0        |
| 0 | 0 | 0 | 0 | 0 | 0 | 0        | 0        | 0        |
| 0 | 0 | 0 | 0 | 0 | 0 | 0        | 0        | 0.000756 |
| 0 | 0 | 0 | 0 | 0 | 0 | 0        | 0        | 0        |
| 0 | 0 | 0 | 0 | 0 | 0 | 0        | 0        | 0        |
| 0 | 0 | 0 | 0 | 0 | 0 | 0        | 0        | 0        |
| 0 | 0 | 0 | 0 | 0 | 0 | 0        | 0        | 0        |
| 0 | 0 | 0 | 0 | 0 | 0 | 0        | 0.00092  | 0.002071 |
| 0 | 0 | 0 | 0 | 0 | 0 | 0        | 0        | 3.29E-05 |
| 0 | 0 | 0 | 0 | 0 | 0 | 0        | 0        | 0        |
| 0 | 0 | 0 | 0 | 0 | 0 | 0        | 0        | 0        |
| 0 | 0 | 0 | 0 | 0 | 0 | 0        | 0        | 0        |
| 0 | 0 | 0 | 0 | 0 | 0 | 0        | 0        | 0.000526 |
| 0 | 0 | 0 | 0 | 0 | 0 | 0        | 0        | 0        |
| 0 | 0 | 0 | 0 | 0 | 0 | 0        | 0        | 3.29E-05 |
| 0 | 0 | 0 | 0 | 0 | 0 | 0        | 0        | 0.000164 |
| 0 | 0 | 0 | 0 | 0 | 0 | 0        | 0        | 0.000263 |
| 0 | 0 | 0 | 0 | 0 | 0 | 0        | 0        | 0.000362 |
| 0 | 0 | 0 | 0 | 0 | 0 | 6.57E-05 | 0        | 0.000131 |
| 0 | 0 | 0 | 0 | 0 | 0 | 0        | 0        | 0        |
| 0 | 0 | 0 | 0 | 0 | 0 | 0        | 0        | 0.000362 |
| 0 | 0 | 0 | 0 | 0 | 0 | 0        | 0        | 0        |
| 0 | 0 | 0 | 0 | 0 | 0 | 0        | 0        | 0        |
| 0 | 0 | 0 | 0 | 0 | 0 | 0        | 0        | 0        |
| 0 | 0 | 0 | 0 | 0 | 0 | 0        | 0        | 0        |
| 0 | 0 | 0 | 0 | 0 | 0 | 0        | 0        | 0.000625 |
| 0 | 0 | 0 | 0 | 0 | 0 | 0        | 0        | 0.010914 |
| 0 | 0 | 0 | 0 | 0 | 0 | 0        | 0        | 0.002137 |
| 0 | 0 | 0 | 0 | 0 | 0 | 0        | 0        | 0.000131 |
| 0 | 0 | 0 | 0 | 0 | 0 | 0        | 0        | 0        |
| 0 | 0 | 0 | 0 | 0 | 0 | 0        | 0        | 9.86E-05 |
| 0 | 0 | 0 | 0 | 0 | 0 | 0        | 0.000131 | 0        |
| 0 | 0 | 0 | 0 | 0 | 0 | 0        | 0        | 0.005917 |
| 0 | 0 | 0 | 0 | 0 | 0 | 0        | 0        | 0        |
| 0 | 0 | 0 | 0 | 0 | 0 | 0        | 0        | 0.000657 |
| 0 | 0 | 0 | 0 | 0 | 0 | 0        | 9.86E-05 | 0.000329 |















|   |          |          |          |   |          |   |          |          |
|---|----------|----------|----------|---|----------|---|----------|----------|
| 0 | 0        | 0        | 3.29E-05 | 0 | 0        | 0 | 0        | 0.00194  |
| 0 | 0        | 0        | 0        | 0 | 0        | 0 | 0        | 0.000822 |
| 0 | 0        | 0        | 0        | 0 | 0        | 0 | 0        | 0.000362 |
| 0 | 0        | 0        | 0        | 0 | 0        | 0 | 0        | 0.000953 |
| 0 | 0        | 0        | 0        | 0 | 0        | 0 | 0        | 0.000296 |
| 0 | 0        | 0        | 0        | 0 | 0        | 0 | 0        | 0        |
| 0 | 0        | 0        | 0        | 0 | 0        | 0 | 0        | 0.000329 |
| 0 | 0        | 0        | 0        | 0 | 0        | 0 | 0        | 0        |
| 0 | 0        | 0        | 0        | 0 | 0        | 0 | 0        | 0        |
| 0 | 0        | 0        | 0        | 0 | 0        | 0 | 0        | 0        |
| 0 | 0        | 0        | 0        | 0 | 0        | 0 | 0        | 3.29E-05 |
| 0 | 0        | 0        | 0        | 0 | 0        | 0 | 0        | 0        |
| 0 | 0        | 0        | 0        | 0 | 0        | 0 | 0        | 0        |
| 0 | 0        | 0        | 0        | 0 | 0        | 0 | 0        | 0        |
| 0 | 0        | 0        | 0        | 0 | 0        | 0 | 0        | 0        |
| 0 | 0        | 0        | 0        | 0 | 0        | 0 | 0        | 0        |
| 0 | 0        | 0        | 0        | 0 | 0        | 0 | 0        | 0        |
| 0 | 0        | 0        | 0        | 0 | 0        | 0 | 0        | 9.86E-05 |
| 0 | 0        | 0        | 0        | 0 | 0        | 0 | 0        | 0.000362 |
| 0 | 0        | 0        | 0        | 0 | 0        | 0 | 0        | 9.86E-05 |
| 0 | 0        | 0        | 0        | 0 | 0        | 0 | 0        | 0.001216 |
| 0 | 0        | 0        | 0        | 0 | 0        | 0 | 0        | 0.000394 |
| 0 | 0        | 0        | 0        | 0 | 0        | 0 | 0        | 9.86E-05 |
| 0 | 0        | 0        | 0        | 0 | 0        | 0 | 0.000131 | 0.000197 |
| 0 | 0        | 0        | 0        | 0 | 0        | 0 | 0        | 3.29E-05 |
| 0 | 0        | 0        | 0        | 0 | 0        | 0 | 0        | 0.00069  |
| 0 | 0        | 0        | 0        | 0 | 0        | 0 | 0        | 0.00023  |
| 0 | 3.29E-05 | 0        | 0        | 0 | 0        | 0 | 0        | 0.000756 |
| 0 | 0        | 0        | 0        | 0 | 0        | 0 | 0.000164 | 6.57E-05 |
| 0 | 0        | 0        | 0        | 0 | 0        | 0 | 0        | 6.57E-05 |
| 0 | 0        | 0        | 0        | 0 | 0        | 0 | 0.000131 | 0        |
| 0 | 0        | 0        | 0        | 0 | 0        | 0 | 0.000296 | 0.000131 |
| 0 | 0        | 0        | 0        | 0 | 0        | 0 | 6.57E-05 | 9.86E-05 |
| 0 | 0        | 0        | 0        | 0 | 0        | 0 | 9.86E-05 | 9.86E-05 |
| 0 | 0        | 0        | 0        | 0 | 0        | 0 | 0        | 3.29E-05 |
| 0 | 0        | 0        | 0        | 0 | 0        | 0 | 0        | 0.00023  |
| 0 | 0        | 0        | 0        | 0 | 0        | 0 | 0        | 0.00881  |
| 0 | 0        | 0        | 0        | 0 | 0        | 0 | 0.000197 | 3.29E-05 |
| 0 | 0        | 0        | 0        | 0 | 0        | 0 | 0        | 0.00217  |
| 0 | 0        | 0        | 0        | 0 | 0        | 0 | 0        | 3.29E-05 |
| 0 | 0        | 0        | 0        | 0 | 0        | 0 | 0        | 0.000625 |
| 0 | 0        | 0        | 0        | 0 | 0        | 0 | 0        | 0.00046  |
| 0 | 0        | 0        | 0        | 0 | 0        | 0 | 0        | 0.001085 |
| 0 | 0        | 0        | 0        | 0 | 0        | 0 | 0        | 0.002071 |
| 0 | 0        | 0        | 0        | 0 | 0.000197 | 0 | 0        | 0.001677 |
| 0 | 0        | 0        | 0        | 0 | 0        | 0 | 0        | 0.000493 |
| 0 | 0        | 0        | 0        | 0 | 0        | 0 | 0.000329 | 0.000362 |
| 0 | 0        | 3.29E-05 | 0        | 0 | 0        | 0 | 0        | 0.000131 |











| k_Bacteri |
|-----------|-----------|-----------|-----------|-----------|-----------|-----------|-----------|-----------|
| 0         | 0.000296  | 0         | 0         | 0.004504  | 0         | 0         | 0         | 0         |
| 0         | 0.000296  | 0         | 0         | 0.000493  | 0         | 0         | 0         | 0         |
| 0         | 0         | 0         | 0         | 0.002071  | 0         | 0         | 0         | 0         |
| 0         | 3.29E-05  | 0         | 0         | 0.002531  | 0         | 0         | 0         | 0         |
| 0         | 0.000394  | 0         | 0         | 0.002959  | 0         | 0         | 0         | 0         |
| 0         | 0         | 0         | 0         | 0.00046   | 0         | 0         | 0         | 0         |
| 0         | 0.000559  | 0         | 0         | 0.001709  | 0         | 0         | 0         | 0         |
| 0         | 0         | 0         | 0         | 0.000427  | 0         | 0         | 0         | 0         |
| 0         | 3.29E-05  | 0         | 0         | 0.001578  | 0         | 0         | 0         | 0         |
| 0         | 0.000329  | 0         | 0         | 0.001019  | 0         | 0         | 0         | 0         |
| 0         | 0         | 0         | 0         | 3.29E-05  | 0         | 0         | 0         | 0         |
| 0         | 0         | 0         | 0         | 0.000131  | 0         | 0         | 0         | 0         |
| 0         | 0         | 0         | 0         | 9.86E-05  | 0         | 0         | 0         | 0         |
| 0         | 0.008745  | 0.000362  | 0         | 0.000822  | 0         | 0         | 0         | 0         |
| 0         | 0.00263   | 0.001381  | 0         | 9.86E-05  | 0         | 0.000131  | 0         | 0         |
| 0         | 0.000197  | 0         | 0         | 0.000131  | 0         | 0         | 0         | 0         |
| 0         | 0.004011  | 0.000756  | 0         | 3.29E-05  | 0         | 0.000197  | 0         | 0         |
| 0         | 0         | 0         | 0         | 0         | 0         | 0         | 0         | 0         |
| 0         | 0.000164  | 0.000362  | 0         | 3.29E-05  | 0         | 0         | 0         | 0         |
| 0         | 6.57E-05  | 0         | 0         | 0         | 0         | 0         | 0         | 0         |
| 0         | 0.000296  | 0         | 0         | 0.000197  | 0         | 0         | 0         | 0         |
| 0         | 0.004011  | 0         | 0         | 0.000855  | 0         | 0         | 0         | 0         |
| 0         | 0         | 0         | 0         | 0.000164  | 0         | 0         | 0         | 0         |
| 3.29E-05  | 0         | 0         | 0         | 0.000296  | 0         | 0         | 0         | 0         |
| 0         | 9.86E-05  | 0         | 0         | 0.000329  | 0         | 0         | 0         | 0         |
| 0         | 0         | 0         | 0         | 6.57E-05  | 0         | 0         | 0         | 0         |
| 3.29E-05  | 0.000197  | 0         | 0         | 0.000164  | 0         | 0         | 0         | 0         |
| 0         | 0.004898  | 0         | 0         | 0.002498  | 0         | 0.000164  | 0         | 0         |
| 0         | 0.008613  | 0         | 0         | 0.001348  | 0         | 0.000197  | 0         | 0         |
| 0         | 0.002005  | 0         | 0         | 0.00046   | 0         | 0         | 0         | 0         |
| 0         | 3.29E-05  | 0         | 0         | 0.001578  | 0         | 0         | 0         | 0         |
| 0         | 0.000657  | 0         | 0         | 0.000493  | 0         | 0         | 0         | 0         |
| 0         | 3.29E-05  | 0         | 0         | 0.001907  | 0         | 0.00023   | 0         | 0         |
| 0         | 0.000362  | 0.000789  | 0         | 0.001348  | 0         | 0.000131  | 0         | 0         |
| 0         | 0.000625  | 6.57E-05  | 0         | 0.003748  | 0         | 3.29E-05  | 0         | 0         |
| 0         | 0.000723  | 0.00023   | 0         | 0.002597  | 0         | 0.001249  | 0         | 0         |
| 0         | 0         | 0         | 0         | 0.000131  | 0         | 0         | 0         | 0         |
| 0         | 9.86E-05  | 0         | 0         | 0.001578  | 0         | 3.29E-05  | 0         | 0         |
| 0         | 0         | 6.57E-05  | 0         | 0.000394  | 0         | 0.000164  | 0         | 0         |
| 0         | 3.29E-05  | 3.29E-05  | 0         | 0.001348  | 0         | 0         | 0         | 0         |
| 0         | 3.29E-05  | 0.000427  | 0         | 0.001677  | 0         | 3.29E-05  | 0         | 0         |
| 0         | 0         | 0         | 0         | 0.000394  | 9.86E-05  | 0         | 0         | 0         |
| 0         | 0         | 0         | 0         | 0.000592  | 0         | 0         | 0         | 0         |
| 0         | 9.86E-05  | 0         | 0         | 0.000493  | 0         | 0         | 0         | 0         |

|          |          |          |          |          |   |          |          |   |
|----------|----------|----------|----------|----------|---|----------|----------|---|
| 0        | 0        | 0        | 0        | 0.001151 | 0 | 0        | 0        | 0 |
| 0        | 0        | 0        | 0        | 0.000296 | 0 | 0        | 0        | 0 |
| 0        | 0        | 0        | 0        | 0.000164 | 0 | 0        | 0        | 0 |
| 0        | 0        | 0        | 0        | 0.001874 | 0 | 0        | 0        | 0 |
| 0        | 0.000131 | 0        | 0        | 0.000723 | 0 | 0        | 0        | 0 |
| 0        | 0        | 0        | 0        | 0.000131 | 0 | 0        | 0        | 0 |
| 0        | 0        | 0        | 0        | 3.29E-05 | 0 | 0        | 0        | 0 |
| 0        | 0        | 0        | 0        | 0.000394 | 0 | 0        | 0        | 0 |
| 0        | 0        | 0        | 0        | 0.001118 | 0 | 0        | 0        | 0 |
| 0        | 0        | 0        | 0        | 0.004076 | 0 | 0        | 0        | 0 |
| 0        | 0        | 0        | 0        | 0.000822 | 0 | 0        | 0        | 0 |
| 0        | 0        | 0        | 0        | 0.000329 | 0 | 0        | 0        | 0 |
| 0        | 0        | 0        | 0        | 0.000394 | 0 | 0        | 0        | 0 |
| 0        | 0        | 0        | 0        | 0.000394 | 0 | 0        | 0        | 0 |
| 9.86E-05 | 0        | 0        | 0        | 0.000296 | 0 | 6.57E-05 | 0        | 0 |
| 0        | 0        | 0        | 0        | 0.001611 | 0 | 0        | 0        | 0 |
| 0.000263 | 0        | 0        | 0        | 0        | 0 | 0        | 0        | 0 |
| 0        | 0        | 0        | 0        | 0.000296 | 0 | 0        | 0        | 0 |
| 3.29E-05 | 0        | 3.29E-05 | 0        | 0.000362 | 0 | 6.57E-05 | 0        | 0 |
| 0        | 0        | 0.000362 | 0        | 0.002071 | 0 | 0        | 0        | 0 |
| 0        | 0        | 0        | 0        | 0        | 0 | 0        | 0        | 0 |
| 0        | 0.000329 | 0        | 0        | 0        | 0 | 0        | 0        | 0 |
| 0        | 0.006246 | 0.000131 | 0        | 0.000329 | 0 | 0        | 0        | 0 |
| 0        | 0.000296 | 0        | 0        | 3.29E-05 | 0 | 0        | 0        | 0 |
| 0        | 9.86E-05 | 0        | 0        | 0        | 0 | 0        | 0        | 0 |
| 0        | 0.000131 | 0        | 0        | 6.57E-05 | 0 | 0        | 0        | 0 |
| 0        | 0.000625 | 0        | 0        | 3.29E-05 | 0 | 0        | 0        | 0 |
| 0        | 3.29E-05 | 0        | 0        | 0        | 0 | 0        | 0        | 0 |
| 0        | 0.000164 | 3.29E-05 | 0        | 0.000394 | 0 | 0        | 0        | 0 |
| 0        | 0.00023  | 0        | 0        | 0        | 0 | 0        | 0        | 0 |
| 0        | 0        | 0        | 0        | 0.002827 | 0 | 0        | 0        | 0 |
| 0        | 0        | 0        | 0        | 0.00092  | 0 | 0        | 0        | 0 |
| 0        | 0        | 0        | 3.29E-05 | 0.00595  | 0 | 0        | 0        | 0 |
| 0        | 0        | 0        | 0        | 0.000657 | 0 | 0        | 0        | 0 |
| 0        | 0        | 0        | 0        | 0.001512 | 0 | 0        | 0        | 0 |
| 0        | 0        | 0        | 0        | 0.00046  | 0 | 0        | 0        | 0 |
| 0        | 0.00023  | 0        | 0        | 0.000362 | 0 | 0        | 0        | 0 |
| 0        | 0        | 0        | 0.001381 | 3.29E-05 | 0 | 0        | 0        | 0 |
| 0        | 0.00092  | 0        | 0        | 0.000493 | 0 | 0        | 0        | 0 |
| 0        | 0        | 0.000493 | 0        | 0.000789 | 0 | 0.000263 | 0        | 0 |
| 0        | 0        | 0        | 0        | 0.000559 | 0 | 0        | 0        | 0 |
| 0        | 0        | 0        | 0        | 0.000986 | 0 | 0        | 0        | 0 |
| 0        | 0        | 0        | 0        | 0.000953 | 0 | 0        | 0        | 0 |
| 0        | 0        | 0        | 0        | 0        | 0 | 0        | 3.29E-05 | 0 |
| 0        | 0        | 0        | 0        | 0        | 0 | 0        | 0        | 0 |
| 0        | 0.000329 | 0        | 0        | 0        | 0 | 0        | 0        | 0 |
| 0        | 0        | 0        | 0        | 0.001052 | 0 | 6.57E-05 | 0        | 0 |

|   |          |          |          |          |   |          |   |   |
|---|----------|----------|----------|----------|---|----------|---|---|
| 0 | 0        | 0        | 0        | 0.000986 | 0 | 0        | 0 | 0 |
| 0 | 0        | 0        | 0        | 0.001381 | 0 | 6.57E-05 | 0 | 0 |
| 0 | 0        | 0        | 0        | 0.001118 | 0 | 0.000164 | 0 | 0 |
| 0 | 0        | 0        | 0        | 0.000855 | 0 | 3.29E-05 | 0 | 0 |
| 0 | 0        | 0        | 0        | 0.000394 | 0 | 0        | 0 | 0 |
| 0 | 0        | 0        | 0        | 3.29E-05 | 0 | 0        | 0 | 0 |
| 0 | 0        | 0        | 0        | 0        | 0 | 0        | 0 | 0 |
| 0 | 0        | 0        | 0        | 0.000197 | 0 | 0        | 0 | 0 |
| 0 | 0        | 0        | 0        | 0.000164 | 0 | 0        | 0 | 0 |
| 0 | 0        | 0        | 0        | 6.57E-05 | 0 | 0        | 0 | 0 |
| 0 | 0        | 0        | 0        | 0.000789 | 0 | 0        | 0 | 0 |
| 0 | 0        | 0        | 0        | 0.000197 | 0 | 0        | 0 | 0 |
| 0 | 0        | 0        | 0        | 0        | 0 | 0        | 0 | 0 |
| 0 | 0.000131 | 0        | 0        | 0.000131 | 0 | 0        | 0 | 0 |
| 0 | 0        | 0        | 0        | 0        | 0 | 0        | 0 | 0 |
| 0 | 0        | 0        | 0        | 0        | 0 | 0        | 0 | 0 |
| 0 | 0        | 0        | 0.000263 | 3.29E-05 | 0 | 0.000263 | 0 | 0 |
| 0 | 3.29E-05 | 0        | 0        | 0        | 0 | 0        | 0 | 0 |
| 0 | 0        | 0        | 0        | 0        | 0 | 0        | 0 | 0 |
| 0 | 6.57E-05 | 0        | 9.86E-05 | 6.57E-05 | 0 | 0        | 0 | 0 |
| 0 | 0.000329 | 0        | 0        | 0        | 0 | 0        | 0 | 0 |
| 0 | 0        | 0        | 0        | 0.000263 | 0 | 6.57E-05 | 0 | 0 |
| 0 | 0        | 0        | 0        | 0        | 0 | 0        | 0 | 0 |
| 0 | 0        | 0        | 0        | 0.000723 | 0 | 3.29E-05 | 0 | 0 |
| 0 | 0        | 0        | 0        | 0.000197 | 0 | 9.86E-05 | 0 | 0 |
| 0 | 0        | 0        | 0        | 0.000822 | 0 | 0.000164 | 0 | 0 |
| 0 | 0        | 0        | 0        | 6.57E-05 | 0 | 0        | 0 | 0 |
| 0 | 0        | 0        | 0        | 0.00023  | 0 | 0        | 0 | 0 |
| 0 | 0        | 0        | 0        | 0        | 0 | 0        | 0 | 0 |
| 0 | 0        | 0        | 0        | 3.29E-05 | 0 | 0        | 0 | 0 |
| 0 | 0        | 3.29E-05 | 0        | 3.29E-05 | 0 | 0        | 0 | 0 |
| 0 | 0        | 0        | 0        | 0.000625 | 0 | 0        | 0 | 0 |
| 0 | 0.00023  | 3.29E-05 | 0        | 0.001216 | 0 | 0        | 0 | 0 |
| 0 | 0.00023  | 0.000131 | 0        | 0.001315 | 0 | 0        | 0 | 0 |
| 0 | 0.000131 | 0.000131 | 6.57E-05 | 0.002005 | 0 | 0.000131 | 0 | 0 |
| 0 | 9.86E-05 | 0.000131 | 0        | 0.000427 | 0 | 0        | 0 | 0 |
| 0 | 0.00069  | 0.000164 | 0        | 0.00023  | 0 | 6.57E-05 | 0 | 0 |
| 0 | 9.86E-05 | 6.57E-05 | 0        | 0.000362 | 0 | 0        | 0 | 0 |
| 0 | 3.29E-05 | 0.000197 | 0        | 0.001118 | 0 | 0        | 0 | 0 |
| 0 | 0.00023  | 0.000329 | 0        | 0.00069  | 0 | 0        | 0 | 0 |
| 0 | 0        | 0.000296 | 0        | 3.29E-05 | 0 | 3.29E-05 | 0 | 0 |
| 0 | 6.57E-05 | 0.00023  | 0        | 0        | 0 | 3.29E-05 | 0 | 0 |
| 0 | 0        | 0        | 0        | 0        | 0 | 0        | 0 | 0 |
| 0 | 3.29E-05 | 0        | 0        | 0.001183 | 0 | 0.000131 | 0 | 0 |
| 0 | 0        | 0        | 0        | 0.000394 | 0 | 6.57E-05 | 0 | 0 |
| 0 | 3.29E-05 | 0        | 0        | 0.001019 | 0 | 9.86E-05 | 0 | 0 |
| 0 | 0        | 0.000362 | 0        | 0.000362 | 0 | 6.57E-05 | 0 | 0 |

|          |          |          |          |          |          |          |   |   |
|----------|----------|----------|----------|----------|----------|----------|---|---|
| 0        | 0        | 0        | 0        | 0.001085 | 0        | 9.86E-05 | 0 | 0 |
| 0        | 0        | 0        | 0        | 0.001644 | 0        | 0        | 0 | 0 |
| 3.29E-05 | 0        | 0        | 0        | 0.003287 | 0        | 6.57E-05 | 0 | 0 |
| 0        | 0        | 0        | 0        | 0.001019 | 0        | 6.57E-05 | 0 | 0 |
| 9.86E-05 | 0        | 0        | 0        | 0.000493 | 0        | 0        | 0 | 0 |
| 0        | 0        | 0        | 0        | 0.000131 | 0        | 0        | 0 | 0 |
| 0        | 0        | 0        | 0        | 0.000559 | 0        | 0        | 0 | 0 |
| 0        | 3.29E-05 | 0        | 0        | 0.000986 | 0        | 0        | 0 | 0 |
| 0        | 0        | 0        | 0        | 0.001348 | 0        | 0        | 0 | 0 |
| 0        | 0        | 0        | 0        | 0.001874 | 0        | 0        | 0 | 0 |
| 0        | 0        | 0        | 0        | 0        | 0        | 0        | 0 | 0 |
| 0        | 0.000329 | 0        | 0        | 0        | 0        | 0        | 0 | 0 |
| 0        | 0.001315 | 0        | 0        | 0        | 0        | 0        | 0 | 0 |
| 0        | 0.001414 | 0        | 0        | 0        | 0        | 0        | 0 | 0 |
| 0        | 0.002433 | 0        | 0        | 0        | 0        | 0        | 0 | 0 |
| 0        | 0.001479 | 0        | 0        | 0        | 0        | 0        | 0 | 0 |
| 0        | 0.000131 | 0        | 0        | 3.29E-05 | 0        | 0        | 0 | 0 |
| 0        | 0        | 0        | 0        | 0        | 0        | 0        | 0 | 0 |
| 0        | 0.000131 | 0        | 0        | 3.29E-05 | 0        | 0        | 0 | 0 |
| 0        | 0.003057 | 0        | 0        | 0.002203 | 0        | 0        | 0 | 0 |
| 0        | 3.29E-05 | 0        | 0        | 0.000362 | 0        | 0        | 0 | 0 |
| 0        | 0.005161 | 0        | 0        | 0.000427 | 0        | 0        | 0 | 0 |
| 0        | 3.29E-05 | 0.000164 | 0        | 0.000329 | 0        | 0.00023  | 0 | 0 |
| 0        | 0        | 0        | 0        | 0.001348 | 0        | 0        | 0 | 0 |
| 0        | 0        | 0.00023  | 0        | 0.000394 | 0        | 0        | 0 | 0 |
| 0        | 0        | 0        | 0        | 9.86E-05 | 0        | 3.29E-05 | 0 | 0 |
| 0        | 6.57E-05 | 6.57E-05 | 0        | 0.000131 | 0        | 0        | 0 | 0 |
| 0        | 9.86E-05 | 0.000394 | 0        | 6.57E-05 | 0        | 0        | 0 | 0 |
| 0        | 0.000296 | 3.29E-05 | 0        | 0.00023  | 0        | 0.000263 | 0 | 0 |
| 0        | 0        | 0        | 0        | 0.00023  | 0        | 0        | 0 | 0 |
| 0        | 0.000756 | 0        | 0        | 0        | 0        | 0        | 0 | 0 |
| 0        | 6.57E-05 | 0        | 0        | 6.57E-05 | 0        | 0        | 0 | 0 |
| 0        | 0        | 0        | 0        | 0        | 0        | 0        | 0 | 0 |
| 0        | 3.29E-05 | 0        | 0        | 0.001578 | 0        | 0        | 0 | 0 |
| 0        | 0        | 0        | 0        | 0.001677 | 0        | 0        | 0 | 0 |
| 0        | 0        | 0.000164 | 0        | 9.86E-05 | 0        | 0        | 0 | 0 |
| 0        | 6.57E-05 | 0        | 0        | 0.000131 | 0        | 0        | 0 | 0 |
| 0        | 0        | 0.00023  | 0.000296 | 3.29E-05 | 3.29E-05 | 0        | 0 | 0 |
| 0        | 0        | 0        | 0        | 0.002597 | 0        | 0        | 0 | 0 |
| 0        | 3.29E-05 | 0        | 0        | 0.001907 | 0        | 0        | 0 | 0 |
| 0        | 3.29E-05 | 0        | 0        | 0.000822 | 0        | 0        | 0 | 0 |
| 0        | 0        | 0        | 0        | 0.001315 | 0        | 0        | 0 | 0 |
| 0        | 0        | 0        | 0        | 0.003583 | 0        | 0        | 0 | 0 |
| 0        | 0        | 0        | 0        | 0.001512 | 0        | 0        | 0 | 0 |
| 0        | 0        | 0        | 0        | 0.000526 | 0        | 0        | 0 | 0 |
| 0        | 9.86E-05 | 0        | 0        | 3.29E-05 | 0        | 0        | 0 | 0 |
| 0        | 0.000164 | 0        | 0        | 0        | 0        | 0        | 0 | 0 |

|   |          |          |          |          |          |          |   |   |
|---|----------|----------|----------|----------|----------|----------|---|---|
| 0 | 0.000197 | 0        | 0        | 6.57E-05 | 0        | 0        | 0 | 0 |
| 0 | 0        | 0        | 0        | 0        | 0        | 0        | 0 | 0 |
| 0 | 0.000263 | 0        | 0        | 9.86E-05 | 0        | 0        | 0 | 0 |
| 0 | 3.29E-05 | 0        | 0        | 3.29E-05 | 0        | 0        | 0 | 0 |
| 0 | 0        | 0        | 0        | 3.29E-05 | 0        | 0        | 0 | 0 |
| 0 | 0.000131 | 6.57E-05 | 0        | 0.001874 | 0        | 0        | 0 | 0 |
| 0 | 0.000131 | 0        | 0        | 0.001512 | 0        | 0        | 0 | 0 |
| 0 | 0.000197 | 0        | 0        | 0.00023  | 0        | 0        | 0 | 0 |
| 0 | 9.86E-05 | 0        | 0        | 0.002038 | 0        | 0        | 0 | 0 |
| 0 | 0.000164 | 0.000394 | 0        | 0.00046  | 0        | 0        | 0 | 0 |
| 0 | 0.000164 | 0        | 0        | 0.000131 | 0        | 0        | 0 | 0 |
| 0 | 0        | 0        | 0        | 0.000131 | 0        | 6.57E-05 | 0 | 0 |
| 0 | 0        | 0        | 0        | 0.000164 | 0        | 0        | 0 | 0 |
| 0 | 0.00023  | 0.000164 | 0        | 0.00092  | 0        | 0.00023  | 0 | 0 |
| 0 | 0.00194  | 0.000263 | 0        | 0.000789 | 0        | 0        | 0 | 0 |
| 0 | 0        | 0        | 0        | 6.57E-05 | 0        | 0        | 0 | 0 |
| 0 | 0        | 0        | 0        | 0.00023  | 0        | 0        | 0 | 0 |
| 0 | 0        | 0        | 0        | 0        | 0        | 0        | 0 | 0 |
| 0 | 0        | 0        | 0        | 0.000197 | 0        | 0        | 0 | 0 |
| 0 | 0        | 0        | 0        | 6.57E-05 | 0.000197 | 0        | 0 | 0 |
| 0 | 0        | 0        | 0        | 0        | 0        | 0        | 0 | 0 |
| 0 | 0        | 0        | 0        | 0        | 0        | 0        | 0 | 0 |
| 0 | 0        | 0        | 0        | 3.29E-05 | 0        | 0        | 0 | 0 |
| 0 | 0        | 0        | 0        | 0        | 0        | 0        | 0 | 0 |
| 0 | 0        | 0        | 0        | 0        | 0        | 0        | 0 | 0 |
| 0 | 0        | 0        | 0        | 0.000592 | 0        | 0        | 0 | 0 |
| 0 | 0        | 0        | 0        | 0        | 0        | 0        | 0 | 0 |
| 0 | 0.000592 | 6.57E-05 | 0        | 0.001381 | 0        | 3.29E-05 | 0 | 0 |
| 0 | 0        | 0        | 0        | 0.000362 | 0        | 0        | 0 | 0 |
| 0 | 0        | 0        | 0        | 0.000362 | 0        | 0        | 0 | 0 |
| 0 | 0        | 3.29E-05 | 0        | 0.000953 | 0        | 0        | 0 | 0 |
| 0 | 0        | 3.29E-05 | 6.57E-05 | 0        | 0        | 0        | 0 | 0 |
| 0 | 0        | 0        | 0        | 0        | 0        | 0        | 0 | 0 |
| 0 | 0        | 0        | 0        | 0.000263 | 0        | 0        | 0 | 0 |
| 0 | 0        | 9.86E-05 | 0        | 0.003353 | 0        | 0        | 0 | 0 |
| 0 | 0        | 0        | 0        | 0.000394 | 0        | 0        | 0 | 0 |
| 0 | 0        | 6.57E-05 | 0        | 0.000723 | 0        | 0        | 0 | 0 |
| 0 | 0        | 0        | 0        | 0.000756 | 0        | 0        | 0 | 0 |
| 0 | 0        | 6.57E-05 | 0        | 0.001183 | 0        | 3.29E-05 | 0 | 0 |
| 0 | 3.29E-05 | 0        | 0        | 0.000329 | 0        | 0        | 0 | 0 |
| 0 | 0        | 0        | 0        | 0.001874 | 0        | 0        | 0 | 0 |
| 0 | 0.000296 | 0.000329 | 0        | 6.57E-05 | 0        | 0.00069  | 0 | 0 |
| 0 | 0.000625 | 0.000263 | 0        | 0.00069  | 0        | 3.29E-05 | 0 | 0 |
| 0 | 0.000131 | 6.57E-05 | 0        | 0.00069  | 0        | 9.86E-05 | 0 | 0 |
| 0 | 9.86E-05 | 0.000559 | 0        | 0.000296 | 0        | 3.29E-05 | 0 | 0 |
| 0 | 0        | 9.86E-05 | 0        | 0.001151 | 0        | 0        | 0 | 0 |
| 0 | 0        | 6.57E-05 | 0        | 3.29E-05 | 0        | 0.000362 | 0 | 0 |









|   |          |          |   |          |   |          |   |   |
|---|----------|----------|---|----------|---|----------|---|---|
| 0 | 0        | 0        | 0 | 0        | 0 | 0        | 0 | 0 |
| 0 | 0        | 0        | 0 | 0.000953 | 0 | 0        | 0 | 0 |
| 0 | 0        | 0        | 0 | 6.57E-05 | 0 | 0        | 0 | 0 |
| 0 | 0.000263 | 0        | 0 | 0.000131 | 0 | 0        | 0 | 0 |
| 0 | 0        | 0        | 0 | 0        | 0 | 0        | 0 | 0 |
| 0 | 0        | 0        | 0 | 0        | 0 | 0        | 0 | 0 |
| 0 | 0        | 0        | 0 | 9.86E-05 | 0 | 0        | 0 | 0 |
| 0 | 0        | 0        | 0 | 0        | 0 | 0        | 0 | 0 |
| 0 | 0        | 0        | 0 | 0        | 0 | 0        | 0 | 0 |
| 0 | 0        | 0        | 0 | 0        | 0 | 0        | 0 | 0 |
| 0 | 0        | 0        | 0 | 0        | 0 | 0        | 0 | 0 |
| 0 | 0        | 0        | 0 | 0        | 0 | 0        | 0 | 0 |
| 0 | 0        | 0        | 0 | 0        | 0 | 0        | 0 | 0 |
| 0 | 0        | 0        | 0 | 0        | 0 | 0        | 0 | 0 |
| 0 | 0        | 0        | 0 | 0        | 0 | 0        | 0 | 0 |
| 0 | 0        | 0        | 0 | 0        | 0 | 0        | 0 | 0 |
| 0 | 0        | 3.29E-05 | 0 | 0        | 0 | 0        | 0 | 0 |
| 0 | 0.000296 | 0.000131 | 0 | 0.000263 | 0 | 0        | 0 | 0 |
| 0 | 0        | 3.29E-05 | 0 | 3.29E-05 | 0 | 0        | 0 | 0 |
| 0 | 0        | 0        | 0 | 0        | 0 | 0        | 0 | 0 |
| 0 | 0        | 0        | 0 | 0.000329 | 0 | 0        | 0 | 0 |
| 0 | 6.57E-05 | 0        | 0 | 0.00069  | 0 | 0        | 0 | 0 |
| 0 | 0.000197 | 0        | 0 | 6.57E-05 | 0 | 0        | 0 | 0 |
| 0 | 0        | 0        | 0 | 6.57E-05 | 0 | 0        | 0 | 0 |
| 0 | 3.29E-05 | 0        | 0 | 0        | 0 | 0        | 0 | 0 |
| 0 | 0        | 0        | 0 | 0.000329 | 0 | 0        | 0 | 0 |
| 0 | 0        | 0        | 0 | 0.000362 | 0 | 0        | 0 | 0 |
| 0 | 3.29E-05 | 0.000296 | 0 | 0.001479 | 0 | 6.57E-05 | 0 | 0 |
| 0 | 9.86E-05 | 6.57E-05 | 0 | 0.000197 | 0 | 0        | 0 | 0 |
| 0 | 6.57E-05 | 3.29E-05 | 0 | 0.00217  | 0 | 9.86E-05 | 0 | 0 |
| 0 | 0.000362 | 0.000394 | 0 | 0.00217  | 0 | 0        | 0 | 0 |
| 0 | 0        | 3.29E-05 | 0 | 0.000164 | 0 | 0        | 0 | 0 |
| 0 | 0.000362 | 0.000296 | 0 | 0.000625 | 0 | 0.000526 | 0 | 0 |
| 0 | 3.29E-05 | 0        | 0 | 0.000131 | 0 | 0        | 0 | 0 |
| 0 | 0        | 0.000296 | 0 | 0.000657 | 0 | 3.29E-05 | 0 | 0 |
| 0 | 0        | 0        | 0 | 9.86E-05 | 0 | 0        | 0 | 0 |
| 0 | 0.000197 | 0.000362 | 0 | 0.001348 | 0 | 3.29E-05 | 0 | 0 |
| 0 | 0.00023  | 0.00023  | 0 | 0.00023  | 0 | 0        | 0 | 0 |
| 0 | 0        | 0        | 0 | 0        | 0 | 9.86E-05 | 0 | 0 |
| 0 | 0.000362 | 0        | 0 | 0.00069  | 0 | 9.86E-05 | 0 | 0 |
| 0 | 0.000131 | 6.57E-05 | 0 | 9.86E-05 | 0 | 6.57E-05 | 0 | 0 |
| 0 | 0.000131 | 6.57E-05 | 0 | 9.86E-05 | 0 | 0.000197 | 0 | 0 |
| 0 | 0.000329 | 9.86E-05 | 0 | 6.57E-05 | 0 | 0.000427 | 0 | 0 |
| 0 | 0.000131 | 0        | 0 | 0        | 0 | 0        | 0 | 0 |
| 0 | 0.000329 | 0        | 0 | 0        | 0 | 0        | 0 | 0 |
| 0 | 0.000625 | 0        | 0 | 0.000263 | 0 | 0        | 0 | 0 |
| 0 | 0.001775 | 6.57E-05 | 0 | 0.000131 | 0 | 0        | 0 | 0 |

|   |          |          |          |          |   |          |   |   |
|---|----------|----------|----------|----------|---|----------|---|---|
| 0 | 0.000329 | 0        | 0        | 0.000164 | 0 | 0        | 0 | 0 |
| 0 | 0.000789 | 0        | 0        | 0.000592 | 0 | 0        | 0 | 0 |
| 0 | 6.57E-05 | 0        | 0        | 0        | 0 | 0        | 0 | 0 |
| 0 | 0.002992 | 0        | 0        | 0.000526 | 0 | 0        | 0 | 0 |
| 0 | 0.000164 | 0.000131 | 0.000263 | 3.29E-05 | 0 | 0        | 0 | 0 |
| 0 | 0.000131 | 6.57E-05 | 0        | 0.000986 | 0 | 0.00023  | 0 | 0 |
| 0 | 0.000559 | 0        | 0        | 0.000362 | 0 | 0        | 0 | 0 |
| 0 | 0.000296 | 3.29E-05 | 0        | 0.000723 | 0 | 6.57E-05 | 0 | 0 |
| 0 | 0.000986 | 9.86E-05 | 0        | 0.00092  | 0 | 0.000592 | 0 | 0 |
| 0 | 0.000164 | 0        | 0        | 0.000625 | 0 | 0.000131 | 0 | 0 |
| 0 | 3.29E-05 | 3.29E-05 | 0        | 0.002038 | 0 | 0.000131 | 0 | 0 |
| 0 | 3.29E-05 | 0        | 0        | 0.004767 | 0 | 0        | 0 | 0 |
| 0 | 0        | 0.000131 | 0        | 0.001446 | 0 | 0        | 0 | 0 |
| 0 | 6.57E-05 | 0.001085 | 0        | 0.00046  | 0 | 0.001085 | 0 | 0 |
| 0 | 0        | 3.29E-05 | 0        | 0.001151 | 0 | 9.86E-05 | 0 | 0 |
| 0 | 0        | 3.29E-05 | 0        | 6.57E-05 | 0 | 6.57E-05 | 0 | 0 |
| 0 | 9.86E-05 | 0        | 0        | 0.001972 | 0 | 0        | 0 | 0 |
| 0 | 0        | 0        | 0        | 0.002137 | 0 | 3.29E-05 | 0 | 0 |
| 0 | 0        | 0.000131 | 0        | 0.001085 | 0 | 6.57E-05 | 0 | 0 |
| 0 | 0        | 6.57E-05 | 0        | 0        | 0 | 0        | 0 | 0 |
| 0 | 0        | 6.57E-05 | 0        | 0.000953 | 0 | 6.57E-05 | 0 | 0 |
| 0 | 0        | 0        | 0        | 0.002992 | 0 | 0        | 0 | 0 |
| 0 | 0        | 0        | 0        | 0.001446 | 0 | 0        | 0 | 0 |
| 0 | 0        | 0        | 0        | 0.003222 | 0 | 0        | 0 | 0 |
| 0 | 0        | 0        | 0        | 0.002268 | 0 | 3.29E-05 | 0 | 0 |
| 0 | 0        | 0        | 0        | 0.000756 | 0 | 3.29E-05 | 0 | 0 |
| 0 | 0        | 0        | 0        | 0        | 0 | 0        | 0 | 0 |
| 0 | 0        | 0        | 0        | 0.000592 | 0 | 0        | 0 | 0 |
| 0 | 0        | 0        | 0        | 6.57E-05 | 0 | 0        | 0 | 0 |
| 0 | 0        | 0        | 0        | 0.000822 | 0 | 0.000164 | 0 | 0 |
| 0 | 0        | 0.000559 | 0        | 0.002926 | 0 | 0.001249 | 0 | 0 |
| 0 | 0        | 3.29E-05 | 0        | 0.000592 | 0 | 0.000131 | 0 | 0 |
| 0 | 9.86E-05 | 3.29E-05 | 0        | 0.001381 | 0 | 0.000296 | 0 | 0 |
| 0 | 0.003846 | 6.57E-05 | 0        | 0.00023  | 0 | 0        | 0 | 0 |
| 0 | 0        | 0        | 0        | 0.000263 | 0 | 0        | 0 | 0 |
| 0 | 0        | 0        | 0        | 0.003912 | 0 | 0        | 0 | 0 |
| 0 | 3.29E-05 | 3.29E-05 | 6.57E-05 | 0.000197 | 0 | 0        | 0 | 0 |
| 0 | 0        | 0        | 0        | 0        | 0 | 0        | 0 | 0 |
| 0 | 0        | 0        | 0        | 0        | 0 | 0        | 0 | 0 |
| 0 | 0        | 0        | 0        | 0        | 0 | 0        | 0 | 0 |
| 0 | 0.000263 | 0        | 0        | 9.86E-05 | 0 | 0        | 0 | 0 |
| 0 | 0        | 0        | 0        | 0        | 0 | 0        | 0 | 0 |
| 0 | 0        | 0        | 0        | 0        | 0 | 0        | 0 | 0 |
| 0 | 0        | 0        | 0        | 0        | 0 | 0        | 0 | 0 |
| 0 | 0        | 0        | 0        | 0        | 0 | 0        | 0 | 0 |
| 0 | 6.57E-05 | 0.000296 | 0        | 0.001052 | 0 | 0.000131 | 0 | 0 |
| 0 | 0        | 0        | 0        | 0.001644 | 0 | 0.000723 | 0 | 0 |

|          |          |          |          |          |   |          |   |   |
|----------|----------|----------|----------|----------|---|----------|---|---|
| 0        | 9.86E-05 | 3.29E-05 | 0        | 0.002104 | 0 | 0        | 0 | 0 |
| 0        | 0.00023  | 0.000131 | 0        | 0.001578 | 0 | 0        | 0 | 0 |
| 0        | 0        | 3.29E-05 | 0        | 0.000559 | 0 | 0        | 0 | 0 |
| 0        | 0        | 6.57E-05 | 0        | 0        | 0 | 0        | 0 | 0 |
| 0        | 0        | 0.000329 | 0        | 6.57E-05 | 0 | 0        | 0 | 0 |
| 0        | 0        | 0        | 0        | 0.006641 | 0 | 0        | 0 | 0 |
| 0        | 0.001052 | 0        | 0        | 0.000164 | 0 | 0        | 0 | 0 |
| 0        | 0.009271 | 0        | 0        | 0.001446 | 0 | 0        | 0 | 0 |
| 0        | 0.001085 | 0        | 0        | 0.000164 | 0 | 0        | 0 | 0 |
| 0        | 0        | 0        | 0        | 0.00046  | 0 | 0        | 0 | 0 |
| 0        | 0.000394 | 0        | 0        | 0.000131 | 0 | 0        | 0 | 0 |
| 0        | 0.000526 | 0        | 0        | 0.00023  | 0 | 0        | 0 | 0 |
| 0        | 0.000723 | 0        | 0        | 0        | 0 | 0        | 0 | 0 |
| 0        | 0.000197 | 0        | 0        | 6.57E-05 | 0 | 0        | 0 | 0 |
| 0        | 0.001841 | 0        | 0        | 0.00069  | 0 | 0        | 0 | 0 |
| 0        | 0.002268 | 0        | 0        | 0.000888 | 0 | 0        | 0 | 0 |
| 0        | 0        | 0        | 0        | 0        | 0 | 0        | 0 | 0 |
| 0        | 0        | 0        | 0.000362 | 0        | 0 | 0        | 0 | 0 |
| 0        | 0        | 0        | 0        | 0        | 0 | 0        | 0 | 0 |
| 3.29E-05 | 0        | 0        | 0        | 3.29E-05 | 0 | 0        | 0 | 0 |
| 0        | 0        | 0        | 0        | 0        | 0 | 0        | 0 | 0 |
| 0        | 0        | 0        | 0        | 0        | 0 | 0        | 0 | 0 |
| 0        | 0        | 0        | 0        | 0        | 0 | 0        | 0 | 0 |
| 0        | 0        | 0        | 0        | 0        | 0 | 0        | 0 | 0 |
| 0        | 0.00023  | 0        | 0        | 0.000625 | 0 | 6.57E-05 | 0 | 0 |
| 0        | 0.003123 | 0        | 0        | 0.000855 | 0 | 0        | 0 | 0 |
| 0        | 0.000164 | 3.29E-05 | 0        | 0.000362 | 0 | 0        | 0 | 0 |
| 0        | 0        | 0.000559 | 0        | 0.001052 | 0 | 9.86E-05 | 0 | 0 |
| 0        | 0        | 0.000855 | 0        | 0.000986 | 0 | 0        | 0 | 0 |
| 0        | 6.57E-05 | 0        | 0        | 0.000822 | 0 | 0        | 0 | 0 |
| 0        | 3.29E-05 | 0        | 6.57E-05 | 0.000164 | 0 | 0        | 0 | 0 |
| 0        | 0        | 0        | 0        | 0.000263 | 0 | 0        | 0 | 0 |
| 0        | 3.29E-05 | 0        | 0        | 6.57E-05 | 0 | 9.86E-05 | 0 | 0 |
| 0        | 0        | 0.000756 | 0        | 0.000131 | 0 | 3.29E-05 | 0 | 0 |
| 0        | 0.000855 | 0.000362 | 0        | 0.000625 | 0 | 6.57E-05 | 0 | 0 |
| 0        | 0        | 0        | 0        | 0.000296 | 0 | 0        | 0 | 0 |
| 0        | 9.86E-05 | 9.86E-05 | 0        | 0.000131 | 0 | 6.57E-05 | 0 | 0 |
| 0        | 0.000362 | 0        | 0        | 0.000723 | 0 | 0        | 0 | 0 |
| 0        | 0.000197 | 0        | 0        | 0        | 0 | 0        | 0 | 0 |
| 0        | 0.000855 | 0.000164 | 0        | 0.000625 | 0 | 0        | 0 | 0 |
| 0        | 0.000953 | 0.000362 | 0        | 0.000329 | 0 | 0        | 0 | 0 |
| 0        | 0        | 0.000362 | 0        | 0.000888 | 0 | 0.000164 | 0 | 0 |
| 0        | 0.001709 | 0        | 0        | 0.001085 | 0 | 0        | 0 | 0 |
| 0        | 0.000164 | 0.000723 | 0        | 0.002071 | 0 | 0        | 0 | 0 |
| 0        | 0.000197 | 0.000263 | 0        | 0.004471 | 0 | 0.000296 | 0 | 0 |
| 0        | 0.001052 | 0.00023  | 0        | 0.001677 | 0 | 0        | 0 | 0 |
| 0        | 0.000131 | 9.86E-05 | 0        | 0        | 0 | 3.29E-05 | 0 | 0 |





























|   |   |   |          |   |   |   |          |          |
|---|---|---|----------|---|---|---|----------|----------|
| 0 | 0 | 0 | 0        | 0 | 0 | 0 | 9.86E-05 | 0        |
| 0 | 0 | 0 | 0        | 0 | 0 | 0 | 0        | 0        |
| 0 | 0 | 0 | 0        | 0 | 0 | 0 | 0        | 0        |
| 0 | 0 | 0 | 0        | 0 | 0 | 0 | 0        | 0        |
| 0 | 0 | 0 | 0        | 0 | 0 | 0 | 0        | 0        |
| 0 | 0 | 0 | 0        | 0 | 0 | 0 | 0        | 0        |
| 0 | 0 | 0 | 0        | 0 | 0 | 0 | 0        | 0        |
| 0 | 0 | 0 | 0        | 0 | 0 | 0 | 0        | 0        |
| 0 | 0 | 0 | 0        | 0 | 0 | 0 | 0        | 0        |
| 0 | 0 | 0 | 0        | 0 | 0 | 0 | 0.000493 | 0        |
| 0 | 0 | 0 | 0        | 0 | 0 | 0 | 0        | 0        |
| 0 | 0 | 0 | 0        | 0 | 0 | 0 | 0        | 0        |
| 0 | 0 | 0 | 0        | 0 | 0 | 0 | 0        | 0        |
| 0 | 0 | 0 | 0        | 0 | 0 | 0 | 9.86E-05 | 0        |
| 0 | 0 | 0 | 0        | 0 | 0 | 0 | 3.29E-05 | 0        |
| 0 | 0 | 0 | 0        | 0 | 0 | 0 | 3.29E-05 | 0        |
| 0 | 0 | 0 | 3.29E-05 | 0 | 0 | 0 | 0        | 0        |
| 0 | 0 | 0 | 0        | 0 | 0 | 0 | 0        | 0        |
| 0 | 0 | 0 | 0        | 0 | 0 | 0 | 0        | 0        |
| 0 | 0 | 0 | 0        | 0 | 0 | 0 | 0        | 0        |
| 0 | 0 | 0 | 0        | 0 | 0 | 0 | 0        | 0        |
| 0 | 0 | 0 | 0        | 0 | 0 | 0 | 0        | 0        |
| 0 | 0 | 0 | 0        | 0 | 0 | 0 | 0        | 0        |
| 0 | 0 | 0 | 0        | 0 | 0 | 0 | 0        | 0        |
| 0 | 0 | 0 | 0        | 0 | 0 | 0 | 0        | 0        |
| 0 | 0 | 0 | 0        | 0 | 0 | 0 | 0        | 0        |
| 0 | 0 | 0 | 0        | 0 | 0 | 0 | 0        | 0        |
| 0 | 0 | 0 | 0        | 0 | 0 | 0 | 0        | 0        |
| 0 | 0 | 0 | 0        | 0 | 0 | 0 | 0        | 0        |
| 0 | 0 | 0 | 0        | 0 | 0 | 0 | 0        | 0        |
| 0 | 0 | 0 | 0        | 0 | 0 | 0 | 0        | 0        |
| 0 | 0 | 0 | 0        | 0 | 0 | 0 | 0.000131 | 0        |
| 0 | 0 | 0 | 0        | 0 | 0 | 0 | 0.00194  | 0        |
| 0 | 0 | 0 | 0        | 0 | 0 | 0 | 6.57E-05 | 0        |
| 0 | 0 | 0 | 0        | 0 | 0 | 0 | 9.86E-05 | 0        |
| 0 | 0 | 0 | 0        | 0 | 0 | 0 | 0.00023  | 0        |
| 0 | 0 | 0 | 0        | 0 | 0 | 0 | 0.000592 | 0        |
| 0 | 0 | 0 | 0        | 0 | 0 | 0 | 0.00217  | 0        |
| 0 | 0 | 0 | 0        | 0 | 0 | 0 | 0.000329 | 6.57E-05 |
| 0 | 0 | 0 | 0        | 0 | 0 | 0 | 0        | 0        |
| 0 | 0 | 0 | 0        | 0 | 0 | 0 | 0.124758 | 0        |
| 0 | 0 | 0 | 0        | 0 | 0 | 0 | 0        | 0        |
| 0 | 0 | 0 | 0        | 0 | 0 | 0 | 0.000296 | 0        |
| 0 | 0 | 0 | 0        | 0 | 0 | 0 | 0.000296 | 0        |
| 0 | 0 | 0 | 0        | 0 | 0 | 0 | 0.067359 | 0        |
| 0 | 0 | 0 | 0        | 0 | 0 | 0 | 0.004175 | 0.001183 |
| 0 | 0 | 0 | 0        | 0 | 0 | 0 | 0.001085 | 0        |
| 0 | 0 | 0 | 0        | 0 | 0 | 0 | 0.003419 | 0.001414 |
| 0 | 0 | 0 | 0        | 0 | 0 | 0 | 0.006739 | 0.001644 |
| 0 | 0 | 0 | 0        | 0 | 0 | 0 | 0.00743  | 0        |
| 0 | 0 | 0 | 0        | 0 | 0 | 0 | 0.00023  | 0.000197 |





| k_Bacteri |
|-----------|-----------|-----------|-----------|-----------|-----------|-----------|-----------|-----------|
| 0         | 0         | 0         | 6.57E-05  | 0         | 0         | 0.246293  | 0         | 0.002794  |
| 0         | 0         | 0         | 0         | 0         | 3.29E-05  | 0.245143  | 0         | 0.002597  |
| 0         | 0         | 0         | 0         | 0         | 0         | 0.273743  | 0         | 0.000131  |
| 0         | 0         | 0         | 0         | 0         | 0         | 0.383346  | 0         | 0.00332   |
| 0         | 0         | 0         | 0         | 0         | 0         | 0.226865  | 0         | 0.000131  |
| 0         | 0         | 0         | 0         | 0         | 0         | 0.016536  | 0         | 0         |
| 0.000394  | 0         | 0         | 0         | 0         | 0         | 0.108025  | 0         | 0.004307  |
| 0         | 0         | 0         | 0         | 0         | 0         | 0.087741  | 0         | 0.001808  |
| 0         | 0         | 0         | 0.000263  | 0         | 0         | 0.176567  | 0         | 0.041619  |
| 0         | 0         | 0         | 9.86E-05  | 0         | 0         | 0.072849  | 0         | 0.000625  |
| 0         | 0         | 0         | 0         | 0         | 0         | 0.004931  | 0         | 0.002203  |
| 0         | 0         | 0         | 6.57E-05  | 0         | 0         | 0.022453  | 0         | 0.001019  |
| 0.001019  | 0         | 0         | 6.57E-05  | 0         | 0         | 0.113547  | 0         | 0.100266  |
| 0         | 0.000296  | 0         | 0.000197  | 9.86E-05  | 0         | 0.040632  | 0         | 0.011374  |
| 0         | 3.29E-05  | 0         | 0.00023   | 0.000296  | 0.000164  | 0.084947  | 0         | 0.00881   |
| 0         | 0         | 0         | 3.29E-05  | 0         | 0         | 0.004898  | 0         | 0.009632  |
| 0         | 0         | 0         | 0         | 0         | 0         | 0.105592  | 0         | 0.152766  |
| 0         | 0         | 0         | 3.29E-05  | 0         | 0         | 0.000296  | 0         | 0.000263  |
| 0         | 0         | 0         | 0         | 0         | 3.29E-05  | 0.004339  | 0         | 3.29E-05  |
| 0         | 3.29E-05  | 0         | 3.29E-05  | 0         | 0         | 0.001381  | 0         | 0.003353  |
| 0         | 0         | 0         | 3.29E-05  | 0         | 0         | 0.340938  | 0         | 0.009073  |
| 0         | 0         | 0         | 0         | 0         | 0         | 0.024426  | 0         | 0.000592  |
| 0         | 0         | 0         | 0         | 0         | 9.86E-05  | 0.154476  | 0         | 0.004767  |
| 0         | 0         | 0         | 0         | 0         | 0         | 0.195733  | 0         | 0         |
| 0         | 0         | 0         | 0.00046   | 0         | 0         | 0.240803  | 0         | 6.57E-05  |
| 0         | 0         | 0         | 0.002367  | 0         | 0         | 0.060226  | 0         | 0         |
| 0         | 0         | 0         | 0         | 0         | 0         | 0.087412  | 0         | 0.000559  |
| 0         | 0.001019  | 0         | 0         | 0         | 0         | 0.172754  | 0         | 0         |
| 0         | 0.003748  | 0         | 6.57E-05  | 0.000131  | 0         | 0.311483  | 0         | 0.001742  |
| 0         | 0.000427  | 0         | 0         | 0         | 0         | 0.097077  | 0         | 0.000526  |
| 0         | 0.000888  | 0         | 9.86E-05  | 0         | 0         | 0.117887  | 0         | 0.000362  |
| 0         | 0.000625  | 0         | 9.86E-05  | 0         | 0         | 0.069825  | 0         | 0.001085  |
| 0         | 0.01121   | 0         | 0         | 0         | 9.86E-05  | 0.179362  | 0         | 0.015517  |
| 0         | 6.57E-05  | 0         | 0.034781  | 0.001709  | 0         | 0.403958  | 0         | 0.000493  |
| 0         | 0.000362  | 0         | 0.001118  | 0         | 0         | 0.302081  | 0         | 0.001545  |
| 0         | 0.002005  | 0         | 0.005161  | 0.000493  | 0         | 0.413031  | 0         | 3.29E-05  |
| 0         | 0         | 0         | 0.000953  | 6.57E-05  | 0.000263  | 0.167593  | 0         | 0.001479  |
| 0         | 3.29E-05  | 0         | 0.000888  | 0         | 0         | 0.131168  | 0         | 0.005358  |
| 3.29E-05  | 0.000427  | 0         | 0.009303  | 9.86E-05  | 0         | 0.228607  | 0         | 0         |
| 0         | 0         | 0         | 0.003386  | 0         | 0         | 0.159407  | 0         | 0         |
| 0.00046   | 0         | 0         | 0.004175  | 0.00046   | 0         | 0.143627  | 0         | 0         |
| 0         | 9.86E-05  | 0         | 0.000657  | 3.29E-05  | 0         | 0.094941  | 0         | 0.003452  |
| 0         | 0         | 0         | 0.000493  | 3.29E-05  | 0         | 0.108025  | 0         | 0.015056  |
| 0         | 0.000986  | 0         | 9.86E-05  | 0         | 0         | 0.34508   | 0         | 0         |

|          |          |   |          |          |          |          |   |          |
|----------|----------|---|----------|----------|----------|----------|---|----------|
| 0        | 0        | 0 | 0.002926 | 0.000394 | 0        | 0.174365 | 0 | 0.000296 |
| 0        | 6.57E-05 | 0 | 0.000756 | 0        | 3.29E-05 | 0.112693 | 0 | 0.000559 |
| 0        | 0.000131 | 0 | 0.00023  | 6.57E-05 | 0        | 0.064959 | 0 | 0.000723 |
| 0        | 0        | 0 | 0.000526 | 0.000164 | 0        | 0.172787 | 0 | 0.00092  |
| 0        | 0        | 0 | 0.000197 | 0        | 0        | 0.119958 | 0 | 0.000164 |
| 0        | 0        | 0 | 0.000197 | 0        | 0        | 0.013939 | 0 | 0        |
| 0        | 0        | 0 | 0        | 0        | 6.57E-05 | 0.007002 | 0 | 0.001249 |
| 0        | 0        | 0 | 3.29E-05 | 0        | 0        | 0.048489 | 0 | 0.000164 |
| 0        | 0.000131 | 0 | 0.000427 | 3.29E-05 | 0        | 0.290706 | 0 | 0        |
| 0        | 0        | 0 | 0        | 0        | 0        | 0.209178 | 0 | 0.00023  |
| 0        | 0        | 0 | 0        | 0        | 0.000526 | 0.042145 | 0 | 0.039909 |
| 0        | 0        | 0 | 0        | 0        | 0.001216 | 0.023932 | 0 | 0.002433 |
| 3.29E-05 | 0        | 0 | 0        | 0        | 0        | 0.015615 | 0 | 0.00217  |
| 0        | 0        | 0 | 0        | 0        | 0        | 0.015517 | 0 | 0.000625 |
| 0        | 3.29E-05 | 0 | 0.005358 | 0.000131 | 0        | 0.026957 | 0 | 0        |
| 0        | 0.000296 | 0 | 0.002696 | 0        | 0        | 0.085539 | 0 | 0.004668 |
| 3.29E-05 | 0        | 0 | 0.001611 | 0.000427 | 0        | 0.006049 | 0 | 0        |
| 6.57E-05 | 0        | 0 | 0        | 0        | 0        | 0.090831 | 0 | 0.000329 |
| 0        | 0        | 0 | 0        | 0        | 0        | 0.049443 | 0 | 0.000197 |
| 0        | 0        | 0 | 0        | 0        | 0        | 0.109997 | 0 | 0.001709 |
| 0        | 0        | 0 | 0        | 0        | 0        | 0.029587 | 0 | 0.004405 |
| 0        | 0        | 0 | 0        | 0        | 0        | 0.065453 | 0 | 0.000526 |
| 0        | 3.29E-05 | 0 | 0        | 0        | 0.002005 | 0.06085  | 0 | 0.005753 |
| 0        | 0        | 0 | 0        | 0        | 0        | 0.109931 | 0 | 6.57E-05 |
| 0        | 3.29E-05 | 0 | 0        | 0.000164 | 0.000197 | 0.08304  | 0 | 0.006673 |
| 0        | 0        | 0 | 0        | 3.29E-05 | 0        | 0.013741 | 0 | 6.57E-05 |
| 0        | 0        | 0 | 0        | 0.000263 | 3.29E-05 | 0.112265 | 0 | 0.156941 |
| 0        | 0        | 0 | 0        | 0        | 3.29E-05 | 0.001118 | 0 | 0.044775 |
| 0.000164 | 0        | 0 | 0        | 0.000164 | 0.000131 | 0.103126 | 0 | 0.003945 |
| 0        | 0        | 0 | 0        | 3.29E-05 | 0        | 0.026825 | 0 | 0        |
| 0        | 0        | 0 | 0.009106 | 0        | 0        | 0.000855 | 0 | 0.000131 |
| 0        | 3.29E-05 | 0 | 0.01167  | 0        | 0        | 0.092639 | 0 | 0.000888 |
| 0        | 0        | 0 | 0        | 0        | 0        | 0.252441 | 0 | 0.002992 |
| 0        | 0        | 0 | 0.001052 | 0        | 0        | 0.108682 | 0 | 3.29E-05 |
| 0        | 6.57E-05 | 0 | 0.003649 | 0        | 0        | 0.201223 | 0 | 0.00046  |
| 0        | 3.29E-05 | 0 | 0.00858  | 0        | 0        | 0.257898 | 0 | 0.00046  |
| 0.000657 | 0        | 0 | 0        | 0        | 0.000855 | 0.076958 | 0 | 0.009797 |
| 0        | 0        | 0 | 3.29E-05 | 0        | 0        | 0.022979 | 0 | 0.130478 |
| 0        | 6.57E-05 | 0 | 0.002531 | 0        | 0        | 0.124593 | 0 | 0.007035 |
| 0        | 0        | 0 | 0.001183 | 0        | 9.86E-05 | 0.103488 | 0 | 0.004307 |
| 0        | 0        | 0 | 0.012328 | 6.57E-05 | 0        | 0.071699 | 0 | 0.003057 |
| 0        | 0        | 0 | 0.012131 | 0        | 9.86E-05 | 0.11769  | 0 | 0.000789 |
| 0        | 6.57E-05 | 0 | 0.004011 | 0.000164 | 0        | 0.157007 | 0 | 0.000592 |
| 0        | 0        | 0 | 0        | 0        | 0        | 0.022815 | 0 | 0.110687 |
| 0.005852 | 0        | 0 | 0        | 0        | 0.067951 | 0.11506  | 0 | 0.077057 |
| 0        | 0        | 0 | 0.00092  | 0        | 0        | 0.120418 | 0 | 0.002301 |
| 0        | 0        | 0 | 0        | 0        | 0        | 0.087906 | 0 | 3.29E-05 |

|          |          |         |          |          |          |          |          |          |
|----------|----------|---------|----------|----------|----------|----------|----------|----------|
| 0        | 0        | 0       | 0        | 0        | 0        | 0.125941 | 0        | 6.57E-05 |
| 0        | 0        | 0       | 0        | 0        | 0        | 0.257339 | 0        | 3.29E-05 |
| 0        | 0        | 0       | 0        | 0        | 0        | 0.153785 | 0        | 0.000131 |
| 0.00023  | 6.57E-05 | 0       | 0.003978 | 9.86E-05 | 0        | 0.150268 | 0        | 0.001282 |
| 0        | 0        | 0       | 0        | 0        | 0        | 0.192676 | 0        | 0.000197 |
| 0        | 0        | 0       | 0        | 0        | 0        | 0.04987  | 0        | 0.000789 |
| 0        | 0        | 0       | 0        | 0        | 0        | 0.008646 | 0        | 0.000394 |
| 0        | 0        | 0       | 0        | 0        | 0        | 0.104934 | 0        | 6.57E-05 |
| 0        | 0        | 0       | 6.57E-05 | 0        | 0        | 0.132154 | 0        | 0.000394 |
| 0        | 0        | 0       | 0.004833 | 0        | 0        | 0.041619 | 0        | 0.00023  |
| 0        | 0        | 0       | 0.006575 | 0        | 0        | 0.061738 | 0        | 0.000197 |
| 0        | 0        | 0       | 0.002926 | 0        | 0        | 0.051908 | 0        | 0.00046  |
| 0        | 0        | 0       | 0        | 0        | 0.000913 | 0.010675 | 0        | 0.02458  |
| 0        | 0.000197 | 0       | 0.00069  | 0        | 0        | 0.078997 | 0        | 0.003222 |
| 0        | 0.000263 | 0       | 0.000263 | 0        | 0        | 0.020152 | 0        | 0.006706 |
| 0        | 0        | 0       | 0        | 0        | 6.57E-05 | 0.023111 | 0        | 0.005556 |
| 0.00309  | 9.86E-05 | 0.00023 | 0        | 0        | 0.045958 | 0.10934  | 0.001019 | 0.050462 |
| 0        | 0.000329 | 0       | 0.00023  | 0        | 0        | 0.089023 | 0        | 0.000526 |
| 0        | 0        | 0       | 0        | 0        | 0        | 0.003748 | 0        | 9.86E-05 |
| 0        | 0        | 0       | 0        | 0        | 0        | 0.015845 | 0        | 0.016273 |
| 0        | 0.000164 | 0       | 0        | 0        | 0        | 0.054703 | 0        | 0.002005 |
| 0        | 0        | 0       | 0.018837 | 0.000362 | 0        | 0.106742 | 0        | 0.000822 |
| 0        | 3.29E-05 | 0       | 0.001381 | 0.000789 | 0        | 0.020448 | 0        | 0.000164 |
| 0        | 3.29E-05 | 0       | 0.003945 | 0.000329 | 0        | 0.140077 | 0        | 0.000329 |
| 0        | 6.57E-05 | 0       | 0.003057 | 0.000131 | 0        | 0.06279  | 0        | 0.000197 |
| 0        | 6.57E-05 | 0       | 0.003682 | 0.000296 | 0        | 0.188928 | 0        | 3.29E-05 |
| 0        | 0        | 0       | 0.000263 | 6.57E-05 | 0        | 0.043197 | 0        | 0.000362 |
| 0        | 0        | 0       | 0.001775 | 0.000296 | 0        | 0.198396 | 0        | 0        |
| 0        | 0        | 0       | 0        | 0        | 0        | 0.004537 | 0        | 3.29E-05 |
| 0        | 0        | 0       | 0.000197 | 6.57E-05 | 0        | 0.026431 | 0        | 0.000723 |
| 0        | 0        | 0       | 9.86E-05 | 0        | 0        | 0.012624 | 0        | 0        |
| 0        | 0        | 0       | 0.005326 | 6.57E-05 | 0        | 0.170814 | 0        | 0.000329 |
| 0        | 0        | 0       | 3.29E-05 | 0        | 0        | 0.078536 | 0        | 0.001644 |
| 0        | 3.29E-05 | 0       | 0.000953 | 6.57E-05 | 0        | 0.243762 | 0        | 0.001446 |
| 0        | 0.000263 | 0       | 0.002367 | 0.000526 | 0        | 0.113021 | 0        | 0.000789 |
| 0        | 0.000263 | 0       | 0.000855 | 0.000131 | 0        | 0.091555 | 0        | 0        |
| 0        | 0.00046  | 0       | 0        | 0        | 0        | 0.132056 | 0        | 0.000263 |
| 0        | 0        | 0       | 0.000592 | 6.57E-05 | 0        | 0.051777 | 0        | 6.57E-05 |
| 0        | 0        | 0       | 0.004044 | 6.57E-05 | 0        | 0.185049 | 0        | 0.000164 |
| 0        | 0        | 0       | 0.00457  | 0.00023  | 0        | 0.095006 | 0        | 0        |
| 0.00069  | 0.000888 | 0       | 0.014892 | 0.002498 | 0        | 0.062494 | 0        | 0.006772 |
| 0.000559 | 0.000164 | 0       | 0.026431 | 0.000855 | 0        | 0.136099 | 0        | 0.010618 |
| 0.000394 | 6.57E-05 | 0       | 0.002893 | 3.29E-05 | 0        | 0.014563 | 0        | 3.29E-05 |
| 0        | 0.000164 | 0       | 0.00046  | 6.57E-05 | 0        | 0.140932 | 0        | 9.86E-05 |
| 0        | 6.57E-05 | 0       | 0.004997 | 0.000329 | 0        | 0.098787 | 0        | 0.000131 |
| 0        | 0.00023  | 0       | 0.000789 | 0.00023  | 0        | 0.10786  | 0        | 9.86E-05 |
| 0.000329 | 0.000855 | 0       | 0.000362 | 0.000329 | 0        | 0.054966 | 0        | 0.001545 |

|          |          |   |          |          |          |          |   |          |
|----------|----------|---|----------|----------|----------|----------|---|----------|
| 0        | 9.86E-05 | 0 | 0.001019 | 6.57E-05 | 0        | 0.161281 | 0 | 0        |
| 0        | 0.000131 | 0 | 0.001348 | 0.000131 | 0        | 0.092837 | 0 | 0.000131 |
| 0        | 9.86E-05 | 0 | 0.000756 | 0.000362 | 0        | 0.086919 | 0 | 3.29E-05 |
| 0        | 0        | 0 | 0.000986 | 0.000197 | 0        | 0.037805 | 0 | 0        |
| 0        | 0        | 0 | 9.86E-05 | 9.86E-05 | 0        | 0.033269 | 0 | 0.000296 |
| 0        | 0        | 0 | 0        | 0        | 0        | 0.061639 | 0 | 0.000625 |
| 0        | 6.57E-05 | 0 | 3.29E-05 | 0        | 0        | 0.046583 | 0 | 0.000427 |
| 0        | 0        | 0 | 0        | 0        | 9.86E-05 | 0.056807 | 0 | 0.003222 |
| 0        | 0        | 0 | 0        | 0        | 0        | 0.101614 | 0 | 0.000362 |
| 0        | 0        | 0 | 0        | 0        | 0        | 0.149282 | 0 | 0.000592 |
| 0        | 0        | 0 | 6.57E-05 | 0        | 0        | 0.15921  | 0 | 0.000197 |
| 0        | 0        | 0 | 0        | 0        | 0        | 0.007791 | 0 | 0.083468 |
| 0        | 0        | 0 | 0        | 0        | 0        | 0.000296 | 0 | 3.29E-05 |
| 6.57E-05 | 0        | 0 | 0        | 0        | 0        | 0.000657 | 0 | 0.006345 |
| 0        | 0        | 0 | 0        | 0        | 0        | 0.002071 | 0 | 0.02173  |
| 0        | 0        | 0 | 3.29E-05 | 0        | 0        | 0.001907 | 0 | 0        |
| 0        | 0        | 0 | 0        | 0        | 0        | 0.00194  | 0 | 3.29E-05 |
| 0        | 0        | 0 | 0        | 0        | 3.29E-05 | 0.000329 | 0 | 0        |
| 0        | 0        | 0 | 0        | 0        | 0        | 0.002203 | 0 | 0.001446 |
| 0        | 0        | 0 | 9.86E-05 | 0        | 0        | 0.003386 | 0 | 0.003485 |
| 0.001414 | 0        | 0 | 3.29E-05 | 0        | 0.026727 | 0.050922 | 0 | 0.039482 |
| 0        | 0        | 0 | 3.29E-05 | 0        | 0        | 0.000427 | 0 | 0.002334 |
| 0        | 0.000131 | 0 | 0.002729 | 3.29E-05 | 0        | 0.070877 | 0 | 0.001512 |
| 0        | 0        | 0 | 0.000427 | 3.29E-05 | 0        | 0.09333  | 0 | 0.000427 |
| 0        | 0.000131 | 0 | 0.001414 | 0        | 0        | 0.140208 | 0 | 0.001874 |
| 0        | 3.29E-05 | 0 | 0        | 0        | 0        | 0.022716 | 0 | 0.0048   |
| 0        | 3.29E-05 | 0 | 0        | 6.57E-05 | 0        | 0.038003 | 0 | 0.007561 |
| 0        | 0.000197 | 0 | 0        | 0.000131 | 0.00046  | 0.041717 | 0 | 0.019955 |
| 0.000625 | 0.00023  | 0 | 0        | 9.86E-05 | 0.000296 | 0.104507 | 0 | 0.03386  |
| 0        | 0        | 0 | 0.000592 | 0        | 0.000296 | 0.058976 | 0 | 0.006904 |
| 0        | 0        | 0 | 0.000296 | 0.000953 | 0        | 0.060817 | 0 | 0.004964 |
| 0        | 0.000855 | 0 | 0.000493 | 9.86E-05 | 0.003945 | 0.091062 | 0 | 0.035406 |
| 0.001742 | 0.000559 | 0 | 0.000526 | 0.000131 | 0        | 0.065157 | 0 | 0.062165 |
| 0        | 6.57E-05 | 0 | 0.004339 | 0        | 0        | 0.140471 | 0 | 0.005819 |
| 0.00023  | 0        | 0 | 0.000756 | 0        | 0        | 0.118774 | 0 | 0.002268 |
| 0        | 0.000164 | 0 | 0.000986 | 0.000756 | 0        | 0.050495 | 0 | 0.009566 |
| 0        | 0        | 0 | 0.003748 | 0        | 3.29E-05 | 0.076038 | 0 | 0.000789 |
| 0        | 0.001019 | 0 | 0.000592 | 0.00069  | 0        | 0.105263 | 0 | 0.001808 |
| 0        | 0        | 0 | 0.000592 | 0        | 0        | 0.167757 | 0 | 0.00046  |
| 0        | 0        | 0 | 3.29E-05 | 0        | 0        | 0.279102 | 0 | 0.000131 |
| 0        | 0        | 0 | 0        | 0        | 0        | 0.359446 | 0 | 0.000131 |
| 0        | 0        | 0 | 0.000164 | 0        | 0        | 0.18666  | 0 | 0.00217  |
| 0        | 0        | 0 | 0        | 0        | 0        | 0.531773 | 0 | 0        |
| 0        | 0        | 0 | 0.001052 | 0        | 0        | 0.250205 | 0 | 3.29E-05 |
| 0        | 0        | 0 | 3.29E-05 | 0        | 6.57E-05 | 0.149479 | 0 | 0.000329 |
| 0        | 6.57E-05 | 0 | 0        | 0        | 0        | 0.002531 | 0 | 0.000131 |
| 0        | 0        | 0 | 0        | 0        | 0        | 0.002597 | 0 | 0.006871 |



|   |          |   |          |          |          |          |          |          |
|---|----------|---|----------|----------|----------|----------|----------|----------|
| 0 | 0.000197 | 0 | 0        | 3.29E-05 | 3.29E-05 | 0.011342 | 0        | 0        |
| 0 | 3.29E-05 | 0 | 0        | 6.57E-05 | 0        | 0.000756 | 0        | 3.29E-05 |
| 0 | 0.001216 | 0 | 0        | 0.000394 | 0        | 0.02219  | 0.000296 | 0.031822 |
| 0 | 0        | 0 | 0        | 0        | 0        | 0.000493 | 0        | 0.000164 |
| 0 | 0        | 0 | 0        | 6.57E-05 | 0        | 0.00549  | 9.86E-05 | 0        |
| 0 | 0        | 0 | 9.86E-05 | 0        | 0        | 0.110457 | 0        | 0.005556 |
| 0 | 0        | 0 | 0.000263 | 0        | 0        | 0.080377 | 0        | 0.000756 |
| 0 | 0        | 0 | 0        | 0        | 0        | 0.0358   | 0        | 0.000263 |
| 0 | 0        | 0 | 0        | 0        | 0        | 0.064302 | 0        | 0.000362 |
| 0 | 0        | 0 | 3.29E-05 | 0        | 0        | 0.030179 | 0        | 0.001085 |
| 0 | 0        | 0 | 0        | 0        | 0        | 0.01716  | 0        | 0.003846 |
| 0 | 0        | 0 | 0.023341 | 0.00023  | 0        | 0.160656 | 0        | 0.002531 |
| 0 | 0        | 0 | 6.57E-05 | 0        | 0        | 0.064302 | 0        | 0.00069  |
| 0 | 0.000131 | 0 | 0.005852 | 0.000329 | 0        | 0.272626 | 0        | 0.000953 |
| 0 | 0        | 0 | 0.00789  | 0.00023  | 6.57E-05 | 0.187054 | 0        | 0.000822 |
| 0 | 0        | 0 | 0.001019 | 0        | 0        | 0.030014 | 0        | 0.010717 |
| 0 | 0        | 0 | 0.007232 | 0        | 0        | 0.011835 | 0        | 0.004241 |
| 0 | 0        | 0 | 0        | 0        | 0        | 0.000427 | 0        | 0.004767 |
| 0 | 0        | 0 | 0.007364 | 0        | 0        | 0.073441 | 0        | 0.00766  |
| 0 | 0        | 0 | 0.00194  | 0        | 0        | 0.017686 | 0        | 0.016864 |
| 0 | 0        | 0 | 0.006246 | 0        | 0.000263 | 0.061606 | 0        | 0.001315 |
| 0 | 0        | 0 | 0.02574  | 0        | 0        | 0.022059 | 0        | 0.002531 |
| 0 | 3.29E-05 | 0 | 6.57E-05 | 0        | 0        | 0.003024 | 0        | 9.86E-05 |
| 0 | 0        | 0 | 0        | 0        | 0        | 0.003353 | 0        | 0        |
| 0 | 0        | 0 | 0        | 0        | 9.86E-05 | 0.060982 | 0        | 0.004076 |
| 0 | 0        | 0 | 0.00023  | 0        | 0.000197 | 0.062428 | 0        | 0.046221 |
| 0 | 0.000822 | 0 | 0.002794 | 0        | 0        | 0.115914 | 0        | 0.005589 |
| 0 | 0.000329 | 0 | 0.001874 | 0.000625 | 3.29E-05 | 0.111279 | 0        | 0.004274 |
| 0 | 0.00023  | 0 | 0.000197 | 0.000329 | 0        | 0.08041  | 0        | 0.000197 |
| 0 | 0        | 0 | 0.00046  | 3.29E-05 | 0        | 0.056116 | 0        | 0.003616 |
| 0 | 6.57E-05 | 0 | 0.001118 | 6.57E-05 | 0        | 0.088103 | 0        | 0.003682 |
| 0 | 0        | 0 | 0        | 0        | 0        | 0.010717 | 0        | 6.57E-05 |
| 0 | 0        | 0 | 3.29E-05 | 0        | 6.57E-05 | 0.003846 | 0        | 0.002137 |
| 0 | 0        | 0 | 0.000197 | 0.000296 | 0        | 0.068181 | 0        | 0.001677 |
| 0 | 0        | 0 | 0.002137 | 0        | 6.57E-05 | 0.327953 | 0        | 0.002729 |
| 0 | 0        | 0 | 0.002005 | 0        | 3.29E-05 | 0.089845 | 0        | 0.002827 |
| 0 | 0        | 0 | 0.000197 | 0        | 0        | 0.111937 | 0        | 0.01315  |
| 0 | 0        | 0 | 0.005128 | 0        | 0        | 0.062527 | 0        | 0.000362 |
| 0 | 0        | 0 | 0.002597 | 0        | 0        | 0.100398 | 0        | 0.001381 |
| 0 | 3.29E-05 | 0 | 0.002301 | 6.57E-05 | 0        | 0.219304 | 0        | 0.000394 |
| 0 | 0        | 0 | 0.001907 | 0        | 0        | 0.231138 | 0        | 0.000493 |
| 0 | 0        | 0 | 0.006213 | 0.000362 | 0        | 0.430948 | 0        | 0.000888 |
| 0 | 6.57E-05 | 0 | 0.002959 | 0.001052 | 0        | 0.159045 | 0        | 6.57E-05 |
| 0 | 0        | 0 | 0.002038 | 0.000789 | 0        | 0.190407 | 0        | 0.00046  |
| 0 | 9.86E-05 | 0 | 0.000822 | 0.000559 | 0        | 0.177521 | 0        | 0.000197 |
| 0 | 3.29E-05 | 0 | 0.001019 | 0.000394 | 0.000329 | 0.100398 | 0        | 0.045662 |
| 0 | 0.000164 | 0 | 0.009402 | 0.000657 | 0        | 0.034025 | 0        | 0.021894 |

|          |          |   |          |          |          |          |   |          |
|----------|----------|---|----------|----------|----------|----------|---|----------|
| 0        | 0.000493 | 0 | 0.001775 | 0.000197 | 0        | 0.152832 | 0 | 0.007101 |
| 0        | 0        | 0 | 0.001183 | 0.00069  | 0        | 0.085276 | 0 | 0.005621 |
| 0        | 0.000197 | 0 | 0.00092  | 0        | 0        | 0.047405 | 0 | 0.01578  |
| 0        | 0        | 0 | 0        | 0        | 0        | 0.001677 | 0 | 0.000329 |
| 0        | 0        | 0 | 0        | 0        | 0.001118 | 0.091818 | 0 | 0.002696 |
| 0        | 6.57E-05 | 0 | 6.57E-05 | 0        | 0.000625 | 0.041684 | 0 | 0.023209 |
| 0        | 0        | 0 | 0.001151 | 0        | 0        | 0.113021 | 0 | 0.008021 |
| 0        | 0        | 0 | 0        | 0        | 0        | 0.020382 | 0 | 0.00092  |
| 0        | 0        | 0 | 0        | 0        | 0        | 0.025116 | 0 | 0        |
| 0        | 0        | 0 | 0.005391 | 0.00286  | 0        | 0.114271 | 0 | 0.006279 |
| 0        | 0        | 0 | 0        | 0        | 0        | 0.069726 | 0 | 0.002959 |
| 0        | 0.001315 | 0 | 0.001644 | 0        | 0.00046  | 0.201124 | 0 | 0.007397 |
| 0        | 0        | 0 | 0        | 0        | 0.000131 | 0.035833 | 0 | 0.028206 |
| 0        | 0.000657 | 0 | 0.001348 | 0        | 0        | 0.033334 | 0 | 0.004142 |
| 0        | 0.000197 | 0 | 0        | 3.29E-05 | 0        | 0.11506  | 0 | 0.000888 |
| 0        | 0        | 0 | 0        | 3.29E-05 | 0        | 0.177356 | 0 | 0.00046  |
| 0        | 3.29E-05 | 0 | 0        | 0        | 6.57E-05 | 0.13794  | 0 | 6.57E-05 |
| 0        | 3.29E-05 | 0 | 0        | 0        | 0        | 0.04415  | 0 | 0.000131 |
| 0        | 9.86E-05 | 0 | 0        | 0        | 0        | 0.075545 | 0 | 0.000197 |
| 0        | 0.000131 | 0 | 0        | 3.29E-05 | 0        | 0.134455 | 0 | 3.29E-05 |
| 0        | 6.57E-05 | 0 | 0        | 0        | 0.000131 | 0.113547 | 0 | 0        |
| 0        | 3.29E-05 | 0 | 0        | 0        | 0        | 0.058154 | 0 | 0        |
| 0        | 0        | 0 | 0        | 0        | 0        | 0.030869 | 0 | 6.57E-05 |
| 0        | 0        | 0 | 0        | 0        | 0        | 0.033795 | 0 | 0.001446 |
| 0        | 0        | 0 | 0        | 0        | 0        | 0.007331 | 0 | 9.86E-05 |
| 0        | 0        | 0 | 0        | 0        | 0        | 0.004109 | 0 | 0.00217  |
| 0        | 0        | 0 | 0        | 0        | 0        | 0.004734 | 0 | 6.57E-05 |
| 0        | 6.57E-05 | 0 | 0        | 0        | 0        | 0.008745 | 0 | 0.000131 |
| 0        | 6.57E-05 | 0 | 0        | 0        | 0        | 0.097603 | 0 | 0.004175 |
| 0        | 0        | 0 | 0        | 0        | 0        | 0.000953 | 0 | 3.29E-05 |
| 0        | 0        | 0 | 3.29E-05 | 0        | 0        | 0.006673 | 0 | 6.57E-05 |
| 0        | 0        | 0 | 0        | 0        | 0        | 0.016864 | 0 | 0.000625 |
| 0        | 3.29E-05 | 0 | 0        | 0.000362 | 0        | 0.028798 | 0 | 0.00595  |
| 0        | 6.57E-05 | 0 | 0        | 3.29E-05 | 0        | 0.013577 | 0 | 0.000756 |
| 0        | 0        | 0 | 0.034156 | 3.29E-05 | 0        | 0.065387 | 0 | 0.001414 |
| 0        | 0        | 0 | 0.004767 | 0        | 0        | 0.135376 | 0 | 0.003222 |
| 0        | 0        | 0 | 0        | 0.000362 | 0.000329 | 0.13531  | 0 | 0.007956 |
| 0        | 0        | 0 | 0.000131 | 0        | 0        | 0.091094 | 0 | 0.001677 |
| 0        | 0        | 0 | 0        | 0        | 0        | 0.108518 | 0 | 0.009534 |
| 0        | 0        | 0 | 0.0024   | 0.000131 | 3.29E-05 | 0.163648 | 0 | 0.00309  |
| 6.57E-05 | 0        | 0 | 0.002104 | 0.000131 | 0        | 0.135113 | 0 | 0.000493 |
| 0        | 0        | 0 | 0.001216 | 3.29E-05 | 0        | 0.114501 | 0 | 0.001874 |
| 0        | 0        | 0 | 0.001019 | 0        | 0        | 0.101614 | 0 | 0.008449 |
| 0        | 0        | 0 | 0.002531 | 0.00023  | 0        | 0.016306 | 0 | 0.002071 |
| 3.29E-05 | 6.57E-05 | 0 | 0.000888 | 3.29E-05 | 3.29E-05 | 0.015484 | 0 | 0.002466 |
| 6.57E-05 | 0.00023  | 0 | 0.001249 | 0.000131 | 0        | 0.024491 | 0 | 0.000197 |
| 0        | 0        | 0 | 0.003452 | 0.000131 | 0        | 0.011506 | 0 | 0.000164 |

|          |          |          |          |          |          |          |         |          |
|----------|----------|----------|----------|----------|----------|----------|---------|----------|
| 0.000394 | 9.86E-05 | 0        | 0.0191   | 0.000427 | 3.29E-05 | 0.108353 | 0       | 0.000329 |
| 0.000197 | 3.29E-05 | 0        | 0.010585 | 0.000493 | 0        | 0.05582  | 0       | 0.000493 |
| 0        | 3.29E-05 | 0        | 0.001907 | 3.29E-05 | 0        | 0.098228 | 0       | 0.001709 |
| 0        | 0        | 0        | 0.000493 | 0        | 0.001052 | 0.157763 | 0       | 0.010684 |
| 0        | 0        | 0        | 0.002466 | 0.00023  | 0        | 0.083139 | 0       | 0.001085 |
| 0        | 0        | 0        | 0.001381 | 6.57E-05 | 0        | 0.119563 | 0       | 0.005917 |
| 0        | 0        | 0        | 0.010717 | 0.000822 | 0        | 0.145961 | 0       | 0.004898 |
| 0        | 0        | 0        | 0.007824 | 0.000723 | 0        | 0.223807 | 0       | 0.001972 |
| 0        | 0        | 0        | 0.001578 | 0.00069  | 0        | 0.282455 | 0       | 0.003879 |
| 3.29E-05 | 0        | 0        | 0.004701 | 0.000263 | 0        | 0.194517 | 0       | 3.29E-05 |
| 0        | 0        | 0        | 0.001315 | 9.86E-05 | 0        | 0.061409 | 0       | 0.001315 |
| 0        | 0        | 0        | 0.004011 | 0.000164 | 0        | 0.295407 | 0       | 0.002827 |
| 0        | 0        | 0        | 0.011276 | 0.000953 | 0        | 0.176995 | 0       | 0.000427 |
| 0        | 0        | 0        | 0.009862 | 0.000953 | 0        | 0.212334 | 0       | 3.29E-05 |
| 0        | 0        | 0        | 0.003057 | 0        | 0        | 0.043164 | 0       | 0.000131 |
| 0        | 0        | 0        | 0.004241 | 0        | 0        | 0.12193  | 0       | 0.001446 |
| 0.000427 | 0        | 0.000197 | 0.001151 | 0        | 0.012657 | 0.031559 | 0.00046 | 0.019527 |
| 0        | 0        | 0        | 3.29E-05 | 0        | 0        | 0.034058 | 0       | 0        |
| 0        | 0        | 0        | 0.000559 | 0        | 0        | 0.023801 | 0       | 0.000362 |
| 0        | 0        | 0        | 0.00069  | 0.000362 | 0        | 0.020875 | 0       | 0.000263 |
| 0        | 0        | 0        | 0        | 0        | 0        | 0.012722 | 0       | 6.57E-05 |
| 0        | 0        | 0        | 0        | 0        | 0        | 0.021368 | 0       | 9.86E-05 |
| 0        | 0        | 0        | 0        | 0        | 0        | 0.070285 | 0       | 0.002761 |
| 0        | 0        | 0        | 0        | 0        | 0        | 0.016141 | 0       | 0.000362 |
| 0        | 0        | 0        | 9.86E-05 | 3.29E-05 | 0        | 0.000789 | 0       | 0.000559 |
| 9.86E-05 | 0        | 0        | 0        | 0        | 0        | 0.001019 | 0       | 0.000296 |
| 0        | 0        | 0        | 0        | 0        | 0        | 0.002071 | 0       | 9.86E-05 |
| 0        | 0        | 0        | 0        | 0        | 0        | 0.001808 | 0       | 0.000164 |
| 0        | 0.000197 | 0        | 0.000625 | 0.000329 | 3.29E-05 | 0.033532 | 0       | 0.000263 |
| 0        | 0        | 0        | 3.29E-05 | 6.57E-05 | 0        | 0.014629 | 0       | 0.000657 |
| 0        | 0        | 0        | 9.86E-05 | 0        | 0        | 0.01098  | 0       | 0        |
| 0        | 0        | 0        | 9.86E-05 | 0.000723 | 6.57E-05 | 0.121141 | 0       | 0.005095 |
| 0        | 0        | 0        | 0.002038 | 0.000986 | 0        | 0.100003 | 0       | 6.57E-05 |
| 0        | 0.000394 | 0        | 0.000394 | 0.0024   | 3.29E-05 | 0.163746 | 0       | 0.00046  |
| 0        | 3.29E-05 | 0        | 0.00023  | 0.00092  | 0        | 0.060258 | 0       | 0        |
| 0        | 0        | 0        | 0.000164 | 0        | 0.000131 | 0.012624 | 0       | 0.002433 |
| 0        | 0        | 0        | 0.006016 | 6.57E-05 | 0.000131 | 0.035636 | 0       | 0.023078 |
| 0        | 0        | 0        | 6.57E-05 | 0        | 0.000723 | 0.010684 | 0       | 0.014761 |
| 0        | 0        | 0        | 0.005161 | 9.86E-05 | 0        | 0.047437 | 0       | 0.000559 |
| 0        | 0        | 0        | 0.002301 | 0        | 0        | 0.041421 | 0       | 0.020776 |
| 0        | 0        | 0        | 0.011177 | 0        | 0        | 0.02791  | 0       | 0        |
| 0        | 0        | 0        | 0.003386 | 0        | 0        | 0.09665  | 0       | 0        |
| 0        | 0        | 0        | 0        | 0        | 3.29E-05 | 0.195503 | 0       | 0.002992 |
| 0        | 0        | 0        | 0        | 0        | 0        | 0.02288  | 0       | 0.012591 |
| 0        | 0.020086 | 0        | 0        | 0.004438 | 0        | 0.122654 | 0       | 0.000197 |
| 0        | 0        | 0        | 0.003879 | 0.000394 | 0        | 0.107203 | 0       | 0.002959 |
| 0        | 0        | 0        | 0.000427 | 0.000559 | 0        | 0.085769 | 0       | 0.00092  |

|          |          |   |          |          |          |          |          |          |
|----------|----------|---|----------|----------|----------|----------|----------|----------|
| 0        | 0.000394 | 0 | 0.000394 | 0.000296 | 0        | 0.155068 | 0        | 0.002005 |
| 0.000197 | 9.86E-05 | 0 | 0        | 0.00023  | 0.004504 | 0.270555 | 6.57E-05 | 0.006049 |
| 0        | 0.000362 | 0 | 0.001709 | 9.86E-05 | 0        | 0.051284 | 0        | 0.001019 |
| 0        | 0        | 0 | 0.003123 | 6.57E-05 | 0        | 0.133897 | 0        | 0.000329 |
| 0        | 0        | 0 | 0.007956 | 0.000131 | 0        | 0.191262 | 0        | 0.000657 |
| 0        | 0        | 0 | 0.019462 | 0.000296 | 0        | 0.169203 | 0        | 0.000493 |
| 0        | 0        | 0 | 0.003518 | 0        | 0        | 0.339886 | 0        | 3.29E-05 |
| 0        | 0        | 0 | 6.57E-05 | 0        | 0.00092  | 0.179493 | 0        | 0.00092  |
| 0        | 0        | 0 | 0.007528 | 0        | 0        | 0.224728 | 0        | 0.000131 |
| 0        | 0        | 0 | 0.003748 | 0.000164 | 0        | 0.277886 | 0        | 0.000164 |
| 0        | 0        | 0 | 0.007002 | 0        | 0        | 0.318682 | 0        | 0.00023  |
| 0        | 0        | 0 | 9.86E-05 | 3.29E-05 | 0.000131 | 0.007627 | 0        | 0.00046  |
| 0        | 0        | 0 | 0.000789 | 0        | 0        | 0.235346 | 0        | 3.29E-05 |
| 0        | 0        | 0 | 0.044939 | 0.000362 | 0        | 0.095237 | 0        | 0.002696 |
| 0        | 0        | 0 | 0.000131 | 0        | 0        | 0.330912 | 0        | 6.57E-05 |
| 0        | 0        | 0 | 0.00023  | 0        | 0        | 0.046353 | 0        | 0.003189 |
| 0        | 0.000329 | 0 | 3.29E-05 | 0        | 0        | 0.177915 | 0        | 3.29E-05 |
| 0        | 9.86E-05 | 0 | 3.29E-05 | 0        | 0        | 0.134718 | 0        | 3.29E-05 |
| 0        | 3.29E-05 | 0 | 9.86E-05 | 0        | 0        | 0.043493 | 0        | 0.001874 |
| 0        | 0        | 0 | 6.57E-05 | 0        | 0        | 0.01052  | 0        | 0.004044 |
| 0        | 0.000625 | 0 | 0.001019 | 0.00023  | 6.57E-05 | 0.024097 | 0        | 0.001446 |
| 0        | 0.001545 | 0 | 0.004833 | 6.57E-05 | 0        | 0.080673 | 0        | 0.002729 |
| 0        | 0.000822 | 0 | 0        | 3.29E-05 | 0        | 0.020908 | 0        | 0.012065 |
| 0        | 6.57E-05 | 0 | 0.000986 | 0.000756 | 0        | 0.015747 | 0        | 0.010585 |
| 0        | 0.000164 | 0 | 0.000822 | 0.000197 | 0        | 0.013741 | 0        | 6.57E-05 |
| 0        | 0.000296 | 0 | 0.000362 | 3.29E-05 | 0        | 0.02173  | 0        | 3.29E-05 |
| 0        | 0.000131 | 0 | 0.001381 | 0.00023  | 0        | 0.021302 | 0        | 0.000559 |
| 0        | 9.86E-05 | 0 | 0.000164 | 0.00023  | 0        | 0.264243 | 0        | 0.000657 |
| 0        | 0        | 0 | 0        | 3.29E-05 | 0        | 0.290213 | 0        | 0.000526 |
| 0        | 9.86E-05 | 0 | 3.29E-05 | 9.86E-05 | 0        | 0.337454 | 0        | 0.000756 |
| 0        | 9.86E-05 | 0 | 0        | 0.000164 | 0        | 0.241724 | 0        | 3.29E-05 |
| 0        | 0        | 0 | 0        | 0        | 0        | 0.045892 | 0        | 0.005063 |
| 0        | 0        | 0 | 3.29E-05 | 0        | 0        | 0.044906 | 0        | 0.003024 |
| 0        | 0        | 0 | 0        | 3.29E-05 | 0        | 0.021533 | 0        | 0.000296 |
| 0        | 0        | 0 | 0        | 0        | 0        | 0.017095 | 0        | 3.29E-05 |
| 0        | 0        | 0 | 0        | 0        | 0        | 0.102469 | 0        | 0.003123 |
| 0        | 3.29E-05 | 0 | 0.002071 | 0.00286  | 0        | 0.17591  | 0        | 0.006312 |
| 0        | 0        | 0 | 0.000592 | 0        | 0        | 0.074723 | 0        | 0.005063 |
| 6.57E-05 | 0        | 0 | 0.002203 | 0        | 0        | 0.070614 | 0        | 0.002794 |
| 0        | 0        | 0 | 0.000592 | 0        | 0        | 0.044413 | 0        | 0.018574 |
| 0        | 0        | 0 | 6.57E-05 | 0        | 0        | 0.00789  | 0        | 0.004438 |
| 0        | 0        | 0 | 9.86E-05 | 0        | 0        | 0.001183 | 0        | 0.00046  |
| 0        | 0        | 0 | 0.004471 | 0        | 0        | 0.123508 | 0        | 0.002466 |
| 0        | 0        | 0 | 0.000493 | 0        | 0        | 0.080608 | 0        | 0.001118 |
| 0        | 0        | 0 | 3.29E-05 | 0.000329 | 0        | 0.297446 | 0        | 0.001775 |
| 0        | 0        | 0 | 3.29E-05 | 0        | 3.29E-05 | 0.046977 | 0        | 0.027253 |
| 0        | 0        | 0 | 0        | 0        | 0        | 0.008975 | 0        | 0.044183 |

|          |          |   |          |          |          |          |   |          |
|----------|----------|---|----------|----------|----------|----------|---|----------|
| 0        | 0        | 0 | 0        | 0        | 0.001282 | 0.014136 | 0 | 0.002926 |
| 0        | 0.000427 | 0 | 0.001085 | 0        | 0        | 0.115849 | 0 | 0.007331 |
| 0        | 0        | 0 | 0        | 0        | 0        | 0.023341 | 0 | 0.007627 |
| 0        | 0        | 0 | 0        | 0        | 0.000197 | 0.014629 | 0 | 0.01167  |
| 0        | 0        | 0 | 0        | 0        | 0.000164 | 0.000822 | 0 | 0.003222 |
| 0        | 0        | 0 | 0        | 0        | 0        | 0.000197 | 0 | 3.29E-05 |
| 0        | 0        | 0 | 0        | 0        | 0        | 0.003781 | 0 | 0.000986 |
| 0        | 0        | 0 | 0        | 0        | 0        | 6.57E-05 | 0 | 0.000131 |
| 0        | 0        | 0 | 0        | 0        | 0        | 0.000888 | 0 | 9.86E-05 |
| 0        | 0        | 0 | 0        | 0        | 0        | 0.000197 | 0 | 0        |
| 0        | 0        | 0 | 0        | 0        | 0        | 0.000493 | 0 | 0        |
| 0        | 0        | 0 | 3.29E-05 | 0        | 0.000131 | 0.000559 | 0 | 0        |
| 0        | 0        | 0 | 0        | 0        | 0        | 0.000296 | 0 | 0.000296 |
| 0        | 0        | 0 | 0        | 0        | 0        | 0.000329 | 0 | 0.00023  |
| 0        | 0        | 0 | 0        | 0        | 0        | 0.000263 | 0 | 0.000263 |
| 0        | 0        | 0 | 0        | 0        | 0        | 0.000953 | 0 | 0.001216 |
| 0        | 0        | 0 | 0        | 0        | 0        | 0.002005 | 0 | 0.000526 |
| 0        | 0        | 0 | 0        | 0        | 0        | 0.15155  | 0 | 0.001644 |
| 0        | 6.57E-05 | 0 | 0        | 0        | 0        | 0.175976 | 0 | 0.001183 |
| 0        | 0        | 0 | 0        | 0        | 0.000362 | 0.113449 | 0 | 0.010257 |
| 0        | 0        | 0 | 0        | 0        | 0        | 0.081758 | 0 | 0.000362 |
| 0        | 0        | 0 | 0        | 0        | 0        | 0.109077 | 0 | 0.009468 |
| 0        | 0        | 0 | 0        | 0        | 0        | 0.153983 | 0 | 0.005621 |
| 0        | 0        | 0 | 0        | 0        | 0.000164 | 0.053421 | 0 | 0.000131 |
| 0        | 0        | 0 | 0.000362 | 0        | 6.57E-05 | 0.031855 | 0 | 0.011177 |
| 0        | 0        | 0 | 0.001644 | 0.001019 | 0        | 0.060324 | 0 | 0.006279 |
| 0        | 0        | 0 | 0.000427 | 0        | 0        | 0.102173 | 0 | 0.013183 |
| 0.000296 | 3.29E-05 | 0 | 0.004076 | 0.000394 | 0        | 0.237549 | 0 | 0.00194  |
| 3.29E-05 | 0        | 0 | 0.001151 | 3.29E-05 | 6.57E-05 | 0.070877 | 0 | 0.001381 |
| 6.57E-05 | 0        | 0 | 0.001677 | 0.000197 | 0        | 0.123147 | 0 | 3.29E-05 |
| 0.00023  | 6.57E-05 | 0 | 0.003682 | 0.000394 | 0        | 0.24179  | 0 | 0.000197 |
| 0        | 0        | 0 | 0.000592 | 6.57E-05 | 3.29E-05 | 0.036951 | 0 | 0.001381 |
| 0.00023  | 0        | 0 | 0.000592 | 0.000131 | 0        | 0.161774 | 0 | 3.29E-05 |
| 0        | 0        | 0 | 0.000427 | 3.29E-05 | 0.000131 | 0.016503 | 0 | 0.00069  |
| 0        | 0        | 0 | 0.000592 | 0.000362 | 0        | 0.090371 | 0 | 9.86E-05 |
| 0        | 0        | 0 | 0        | 0        | 3.29E-05 | 0.055853 | 0 | 0.000822 |
| 6.57E-05 | 0        | 0 | 0.002268 | 0.000296 | 0        | 0.18449  | 0 | 0.000197 |
| 0        | 9.86E-05 | 0 | 0.001742 | 0.000822 | 0.000427 | 0.030639 | 0 | 0.050298 |
| 3.29E-05 | 0        | 0 | 0.000394 | 0.000559 | 0        | 0.006936 | 0 | 0.003518 |
| 0        | 0.002104 | 0 | 0.001249 | 0.002531 | 0.00023  | 0.037378 | 0 | 0.003123 |
| 0        | 0.00069  | 0 | 0.009172 | 0.002498 | 0        | 0.035767 | 0 | 0.105    |
| 0        | 0.000723 | 0 | 0.001315 | 0.001151 | 0        | 0.028666 | 0 | 0.003353 |
| 0.000263 | 0        | 0 | 0.004372 | 0.000756 | 0        | 0.043854 | 0 | 0.002564 |
| 0        | 9.86E-05 | 0 | 0        | 0        | 0        | 0.080147 | 0 | 0.060127 |
| 0        | 0        | 0 | 0        | 0        | 0        | 0.011177 | 0 | 0.027713 |
| 0        | 0        | 0 | 0.001315 | 0.000263 | 3.29E-05 | 0.08761  | 0 | 0.008317 |
| 0        | 0        | 0 | 0        | 0        | 0        | 0.046484 | 0 | 0.252934 |

|          |          |   |          |          |          |          |          |          |
|----------|----------|---|----------|----------|----------|----------|----------|----------|
| 0        | 0        | 0 | 0        | 0        | 0        | 0.164897 | 0        | 0.000756 |
| 0        | 0        | 0 | 0        | 0        | 0.000197 | 0.082711 | 0        | 0.001249 |
| 0        | 0        | 0 | 0        | 0        | 6.57E-05 | 0.003287 | 0        | 0.001907 |
| 0        | 0        | 0 | 0        | 0        | 0        | 0.083435 | 0        | 0.000296 |
| 0        | 0        | 0 | 0        | 0        | 0        | 0.03534  | 0        | 0.006641 |
| 6.57E-05 | 0        | 0 | 0.00217  | 0.000427 | 0        | 0.238174 | 0        | 9.86E-05 |
| 0        | 0.003222 | 0 | 9.86E-05 | 0.001512 | 0        | 0.155265 | 0        | 0.002038 |
| 0        | 0.000362 | 0 | 0.000197 | 0        | 0        | 0.238831 | 0        | 0.00069  |
| 0        | 0.001315 | 0 | 0.005358 | 0.001282 | 0        | 0.20474  | 0        | 0.000394 |
| 0        | 0.000131 | 0 | 0.00023  | 0.000164 | 0        | 0.150399 | 0        | 0.000329 |
| 0        | 0.001183 | 0 | 0.007528 | 0.000526 | 0        | 0.161347 | 0        | 0.000723 |
| 0        | 0.000263 | 0 | 3.29E-05 | 6.57E-05 | 0        | 0.137644 | 0        | 0        |
| 0        | 0.000164 | 0 | 0.001907 | 0.000559 | 0        | 0.140899 | 0        | 0.00023  |
| 0        | 0.002564 | 0 | 0.002696 | 0.001709 | 0        | 0.247444 | 0        | 0.00503  |
| 0        | 0.000855 | 0 | 0.002926 | 0.001085 | 0        | 0.215326 | 0        | 0.001644 |
| 0        | 0.000526 | 0 | 0.000789 | 0.000197 | 0        | 0.227917 | 0        | 0.003287 |
| 0        | 0.000197 | 0 | 0.001315 | 0        | 0.000131 | 0.127453 | 0        | 0.003024 |
| 0        | 0.00046  | 0 | 0.00046  | 0.000362 | 0        | 0.419343 | 0        | 0.005786 |
| 0        | 0.000362 | 0 | 0.000329 | 0        | 0        | 0.259476 | 0        | 0.000625 |
| 0        | 0.000657 | 0 | 9.86E-05 | 0.000855 | 6.57E-05 | 0.198297 | 0        | 0.000427 |
| 0        | 0.000625 | 0 | 0.000164 | 3.29E-05 | 0        | 0.303034 | 0        | 0.001446 |
| 0        | 0.00263  | 0 | 0        | 0.000329 | 0        | 0.215655 | 0        | 0.002235 |
| 0        | 0.001052 | 0 | 0.00046  | 3.29E-05 | 0.000427 | 0.270587 | 3.29E-05 | 0.001216 |
| 0        | 0.000493 | 0 | 0.000526 | 3.29E-05 | 6.57E-05 | 0.181564 | 0        | 0.000362 |
| 0        | 6.57E-05 | 0 | 0.009271 | 3.29E-05 | 3.29E-05 | 0.15201  | 0        | 0.002334 |
| 0        | 0        | 0 | 0.002268 | 6.57E-05 | 0        | 0.107992 | 0        | 0.006115 |
| 0        | 0.000394 | 0 | 0.007167 | 9.86E-05 | 3.29E-05 | 0.081462 | 9.86E-05 | 0.001282 |
| 0        | 0        | 0 | 0.000756 | 0.000164 | 0        | 0.129031 | 0        | 0.001414 |
| 0        | 0        | 0 | 0.000789 | 9.86E-05 | 0        | 0.051251 | 0        | 0.002334 |
| 0        | 0.000263 | 0 | 0.006279 | 0.00069  | 0        | 0.184391 | 0        | 0.023998 |
| 0        | 0.000131 | 0 | 0.07709  | 0.002761 | 0        | 0.274499 | 0        | 0.000131 |
| 0        | 0        | 0 | 0.000427 | 0.000394 | 0        | 0.383116 | 0        | 0.00023  |
| 0        | 0        | 0 | 0.000394 | 0.000164 | 0        | 0.102863 | 0        | 0.000263 |
| 6.57E-05 | 0.000986 | 0 | 0        | 0.000723 | 0.002663 | 0.018245 | 0        | 0.009797 |
| 0        | 3.29E-05 | 0 | 0        | 0        | 0        | 0.015352 | 0        | 0.001183 |
| 0        | 0        | 0 | 0        | 0        | 0        | 0.086525 | 0        | 0.000493 |
| 0        | 3.29E-05 | 0 | 3.29E-05 | 0        | 9.86E-05 | 0.02127  | 0        | 0.474144 |
| 0        | 3.29E-05 | 0 | 0        | 0        | 3.29E-05 | 0.007594 | 0        | 0.001183 |
| 0        | 0        | 0 | 6.57E-05 | 0        | 3.29E-05 | 0.000986 | 0        | 0.001151 |
| 0        | 0        | 0 | 0        | 6.57E-05 | 0.000427 | 0.002235 | 0        | 0.030737 |
| 0        | 0        | 0 | 0.001052 | 0        | 0        | 0.058154 | 0        | 0.006706 |
| 0        | 0        | 0 | 0        | 0        | 0        | 0.011966 | 0        | 0        |
| 0        | 0        | 0 | 0        | 0        | 0        | 0.005326 | 0        | 0.00023  |
| 0        | 0        | 0 | 0        | 0        | 6.57E-05 | 0.006213 | 0        | 0.001216 |
| 0        | 0        | 0 | 0        | 0        | 0        | 0.000394 | 0        | 0.000197 |
| 0        | 0.000756 | 0 | 0.001282 | 0.000756 | 3.29E-05 | 0.124495 | 0        | 0.00812  |
| 0        | 0.008251 | 0 | 0.00046  | 0.006213 | 0        | 0.245899 | 0        | 0.000329 |

|          |          |   |          |          |          |          |          |          |
|----------|----------|---|----------|----------|----------|----------|----------|----------|
| 0        | 9.86E-05 | 0 | 3.29E-05 | 0.000197 | 0        | 0.321674 | 0        | 0.000888 |
| 0        | 0.00023  | 0 | 0.000164 | 0.000329 | 0.000197 | 0.207469 | 0        | 0.000164 |
| 0        | 0.000131 | 0 | 0.000394 | 0.000131 | 3.29E-05 | 0.337256 | 0        | 0.003452 |
| 0        | 3.29E-05 | 0 | 0        | 0        | 0        | 0.31648  | 0        | 0.000394 |
| 0        | 0        | 0 | 0        | 0        | 6.57E-05 | 0.201946 | 0        | 0.002235 |
| 0        | 3.29E-05 | 0 | 3.29E-05 | 0        | 0        | 0.26204  | 0        | 3.29E-05 |
| 0        | 0        | 0 | 0        | 0        | 0.000131 | 0.142312 | 0        | 0.013117 |
| 0        | 0        | 0 | 0        | 0        | 0        | 0.064072 | 0        | 0.027976 |
| 0        | 0        | 0 | 0        | 0        | 0.000625 | 0.108156 | 0        | 0.002663 |
| 0        | 0        | 0 | 0.000526 | 0        | 0        | 0.118511 | 0        | 0.010322 |
| 0        | 0        | 0 | 0        | 0        | 0        | 0.056083 | 0        | 0.002104 |
| 0        | 0        | 0 | 0        | 0        | 0        | 0.063184 | 0        | 0.00069  |
| 0        | 3.29E-05 | 0 | 3.29E-05 | 0        | 0        | 0.009336 | 0        | 0.007298 |
| 0        | 0        | 0 | 0.000329 | 0        | 0        | 0.023702 | 0.002663 | 0.036326 |
| 0        | 3.29E-05 | 0 | 6.57E-05 | 0        | 0        | 0.003715 | 0        | 0.004537 |
| 0        | 0        | 0 | 0        | 0        | 0        | 0.004635 | 0        | 0.004898 |
| 0        | 0        | 0 | 0        | 0        | 0.000131 | 0.001709 | 0        | 0.005786 |
| 0        | 0        | 0 | 0        | 0        | 0.000197 | 0.001216 | 0        | 0.010914 |
| 0        | 0        | 0 | 0        | 0        | 0        | 0.000756 | 0        | 0.00332  |
| 0        | 0        | 0 | 0        | 0        | 0.000197 | 0.000394 | 0        | 0.000394 |
| 0        | 0        | 0 | 0        | 0        | 0        | 0.001052 | 0        | 0.005293 |
| 0        | 0        | 0 | 0        | 3.29E-05 | 0        | 0.000855 | 0        | 0.000362 |
| 0        | 0        | 0 | 0        | 0        | 0        | 0.00092  | 0        | 0.004898 |
| 0        | 0        | 0 | 0        | 0        | 0        | 0.00069  | 0        | 0.002531 |
| 0        | 3.29E-05 | 0 | 0.008679 | 0        | 0        | 0.074592 | 0        | 0.000263 |
| 0        | 0        | 0 | 0.002071 | 0        | 0        | 0.195897 | 0        | 0.000855 |
| 0        | 0        | 0 | 0        | 0        | 0        | 0.076367 | 0        | 0.000164 |
| 0        | 0        | 0 | 0.004175 | 3.29E-05 | 0.000131 | 0.195733 | 0        | 0.007725 |
| 0        | 0.000329 | 0 | 0.004767 | 0.001118 | 0        | 0.089221 | 0        | 0.014202 |
| 0        | 0.00023  | 0 | 0.02196  | 0.000657 | 0        | 0.149972 | 0        | 0.00046  |
| 0        | 0.000131 | 0 | 0.006936 | 6.57E-05 | 0        | 0.138663 | 0        | 0.011111 |
| 0        | 0.000394 | 0 | 0.005917 | 9.86E-05 | 0        | 0.065321 | 0        | 6.57E-05 |
| 0        | 6.57E-05 | 0 | 0.005589 | 9.86E-05 | 6.57E-05 | 0.120057 | 0        | 0.00332  |
| 0        | 0.002761 | 0 | 0.008021 | 0.001677 | 0        | 0.100891 | 0        | 9.86E-05 |
| 0.000197 | 6.57E-05 | 0 | 0.002959 | 0.000362 | 0        | 0.172064 | 0        | 0.000822 |
| 0        | 0        | 0 | 0.000362 | 0        | 0        | 0.045662 | 0        | 0.000493 |
| 0        | 0.00572  | 0 | 0        | 6.57E-05 | 0        | 0.121273 | 0        | 0.000625 |
| 0        | 6.57E-05 | 0 | 0.002301 | 0        | 0        | 0.067819 | 0        | 0.008514 |
| 0        | 0.000296 | 0 | 0        | 0        | 0        | 0.021664 | 0        | 0.003748 |
| 0        | 0.000526 | 0 | 0.000756 | 0.000131 | 6.57E-05 | 0.046583 | 0        | 0.008186 |
| 0        | 0.083073 | 0 | 0.001019 | 0.000263 | 3.29E-05 | 0.148328 | 0        | 9.86E-05 |
| 0        | 0.000164 | 0 | 0.015648 | 0.002071 | 0        | 0.16299  | 0        | 0.006147 |
| 6.57E-05 | 3.29E-05 | 0 | 0.002038 | 0.001052 | 0        | 0.106151 | 0        | 0.005654 |
| 0.000263 | 6.57E-05 | 0 | 0.006608 | 0.000592 | 0        | 0.138992 | 0        | 0.000657 |
| 0.000493 | 0.000164 | 0 | 0.008646 | 0.002005 | 0        | 0.216279 | 0        | 0.00309  |
| 6.57E-05 | 0        | 0 | 0.004537 | 0.000263 | 0        | 0.082744 | 0        | 0.021302 |
| 3.29E-05 | 0        | 0 | 0.000329 | 6.57E-05 | 0        | 0.310069 | 0        | 0.000131 |

|   |          |   |          |          |          |          |   |          |
|---|----------|---|----------|----------|----------|----------|---|----------|
| 0 | 0        | 0 | 0.003715 | 0        | 0        | 0.073835 | 0 | 0.000625 |
| 0 | 0        | 0 | 0.001907 | 0.000197 | 0        | 0.107104 | 0 | 0.005687 |
| 0 | 0        | 0 | 0.001446 | 0.000197 | 3.29E-05 | 0.057398 | 0 | 0.000723 |
| 0 | 0.000362 | 0 | 0.000657 | 0.000197 | 0        | 0.174167 | 0 | 0.001315 |
| 0 | 0.000526 | 0 | 0.00217  | 0.000559 | 0        | 0.06851  | 0 | 0.014793 |
| 0 | 3.29E-05 | 0 | 0.00503  | 0.000394 | 0.000164 | 0.081758 | 0 | 0.014596 |
| 0 | 9.86E-05 | 0 | 0.003583 | 0.000197 | 0        | 0.117722 | 0 | 0.001381 |
| 0 | 0        | 0 | 0.002038 | 0.000197 | 0        | 0.224005 | 0 | 6.57E-05 |
| 0 | 9.86E-05 | 0 | 0.001578 | 6.57E-05 | 0        | 0.130971 | 0 | 6.57E-05 |
| 0 | 6.57E-05 | 0 | 0.003123 | 0.000592 | 0        | 0.105954 | 0 | 0.00023  |
| 0 | 0        | 0 | 0.001841 | 6.57E-05 | 0        | 0.137546 | 0 | 0.002235 |
| 0 | 0        | 0 | 0.000493 | 0        | 0        | 0.081462 | 0 | 0.000296 |
| 0 | 9.86E-05 | 0 | 0.010848 | 9.86E-05 | 0        | 0.21171  | 0 | 9.86E-05 |
| 0 | 0        | 0 | 0.000362 | 0        | 0        | 0.013972 | 0 | 0.005687 |
| 0 | 0        | 0 | 0.000789 | 0        | 0        | 0.167724 | 0 | 0.001085 |
| 0 | 0        | 0 | 0.000625 | 0        | 0        | 0.082547 | 0 | 0.00023  |
| 0 | 0        | 0 | 6.57E-05 | 0        | 0        | 0.010487 | 0 | 0.000296 |
| 0 | 0        | 0 | 0.000394 | 0        | 0        | 0.201519 | 0 | 0.00023  |
| 0 | 0        | 0 | 0.001611 | 0        | 0        | 0.126993 | 0 | 6.57E-05 |
| 0 | 0        | 0 | 0.00069  | 3.29E-05 | 0        | 0.140734 | 0 | 0.000296 |
| 0 | 0        | 0 | 0        | 3.29E-05 | 0        | 0.128768 | 0 | 0.000197 |
| 0 | 3.29E-05 | 0 | 0.000131 | 3.29E-05 | 0        | 0.119859 | 0 | 9.86E-05 |
| 0 | 0        | 0 | 9.86E-05 | 0        | 6.57E-05 | 0.089911 | 0 | 0.000197 |
| 0 | 0        | 0 | 6.57E-05 | 6.57E-05 | 6.57E-05 | 0.072751 | 0 | 0.000526 |
| 0 | 0.000164 | 0 | 0.000362 | 3.29E-05 | 0        | 0.14892  | 0 | 9.86E-05 |
| 0 | 0        | 0 | 0        | 0        | 9.86E-05 | 0.00046  | 0 | 0.0048   |
| 0 | 0        | 0 | 0.000164 | 0        | 6.57E-05 | 0.007824 | 0 | 0.002203 |
| 0 | 0        | 0 | 0        | 0        | 0        | 0.001052 | 0 | 0.003057 |
| 0 | 0        | 0 | 0        | 0        | 0        | 9.86E-05 | 0 | 6.57E-05 |
| 0 | 0        | 0 | 0        | 0        | 6.57E-05 | 0.000953 | 0 | 6.57E-05 |
| 0 | 0        | 0 | 0        | 0        | 0        | 0.000756 | 0 | 0.003715 |
| 0 | 0        | 0 | 3.29E-05 | 0        | 0        | 0.000329 | 0 | 0.000394 |
| 0 | 0        | 0 | 0        | 0        | 0        | 0.000657 | 0 | 0.002531 |
| 0 | 0        | 0 | 0        | 0        | 0.000131 | 0.001644 | 0 | 0.009665 |
| 0 | 0        | 0 | 0        | 0        | 0        | 0.000362 | 0 | 3.29E-05 |
| 0 | 0        | 0 | 0.002005 | 0.000329 | 9.86E-05 | 0.12982  | 0 | 0.007167 |
| 0 | 9.86E-05 | 0 | 0.000986 | 6.57E-05 | 0        | 0.074098 | 0 | 0.000164 |
| 0 | 0        | 0 | 0.001151 | 0.000362 | 3.29E-05 | 0.204083 | 0 | 0.00069  |
| 0 | 3.29E-05 | 0 | 0.008646 | 0.001775 | 6.57E-05 | 0.10546  | 0 | 0.005589 |
| 0 | 0.001151 | 0 | 0.007364 | 0.000526 | 3.29E-05 | 0.185739 | 0 | 0.004734 |
| 0 | 0.001709 | 0 | 0.007923 | 0.000822 | 0        | 0.13679  | 0 | 0.000625 |
| 0 | 9.86E-05 | 0 | 0.000197 | 9.86E-05 | 0        | 0.183931 | 0 | 3.29E-05 |
| 0 | 0        | 0 | 0.023965 | 9.86E-05 | 0        | 0.21572  | 0 | 0        |
| 0 | 0        | 0 | 0.000888 | 0.00023  | 0        | 0.09665  | 0 | 0.000625 |
| 0 | 0        | 0 | 0.001808 | 0.000986 | 0        | 0.21023  | 0 | 0.001414 |
| 0 | 0        | 0 | 0        | 0        | 0        | 0.068904 | 0 | 0.000131 |
| 0 | 0        | 0 | 0        | 3.29E-05 | 0        | 0.053355 | 0 | 0.000263 |



|          |          |          |          |          |          |          |   |          |
|----------|----------|----------|----------|----------|----------|----------|---|----------|
| 0        | 0        | 0        | 0.001512 | 0        | 0.000493 | 0.120484 | 0 | 0.003057 |
| 0        | 0        | 0        | 0        | 0        | 0        | 0.166574 | 0 | 0.000822 |
| 0        | 0        | 0        | 6.57E-05 | 0        | 0        | 0.128834 | 0 | 0.001118 |
| 0        | 0        | 9.86E-05 | 0.00092  | 0        | 0        | 0.072093 | 0 | 0.004734 |
| 0        | 0        | 0        | 0        | 0        | 0        | 0.092508 | 0 | 6.57E-05 |
| 0        | 0.000493 | 0        | 0.002005 | 0.000296 | 0        | 0.038693 | 0 | 0.001282 |
| 0        | 0.000362 | 0        | 0.00332  | 0.000197 | 6.57E-05 | 0.075939 | 0 | 0.00332  |
| 0        | 0        | 0        | 0        | 0.00046  | 0        | 0.101746 | 0 | 0.000723 |
| 0        | 0.000296 | 0        | 9.86E-05 | 0        | 0        | 0.048588 | 0 | 0.006476 |
| 0        | 0.000131 | 0        | 0.000362 | 9.86E-05 | 0        | 0.021894 | 0 | 0.000559 |
| 0        | 0        | 0        | 0.00046  | 0        | 0        | 0.079523 | 0 | 0.001315 |
| 0        | 0        | 0        | 0.006443 | 0.000131 | 0        | 0.084355 | 0 | 9.86E-05 |
| 0        | 0        | 0        | 0.000986 | 0        | 0        | 0.012032 | 0 | 0.009698 |
| 0        | 3.29E-05 | 0        | 0.001709 | 0        | 0        | 0.021335 | 0 | 0.01864  |
| 9.86E-05 | 0        | 0        | 0.001118 | 3.29E-05 | 0        | 0.057694 | 0 | 3.29E-05 |
| 0.000131 | 3.29E-05 | 0        | 0.002203 | 0        | 0        | 0.079227 | 0 | 0.000164 |
| 6.57E-05 | 0        | 0        | 0.000427 | 0        | 0        | 0.009665 | 0 | 0.000131 |
| 0.000329 | 0        | 0        | 0.009534 | 6.57E-05 | 0        | 0.059371 | 0 | 0.000592 |
| 0.000197 | 0        | 0        | 0        | 6.57E-05 | 0        | 0.145271 | 0 | 0.000986 |
| 0        | 0        | 0        | 0.000625 | 6.57E-05 | 0        | 0.008186 | 0 | 0.000657 |
| 0.00092  | 6.57E-05 | 0        | 0.00572  | 0.000263 | 0        | 0.108846 | 0 | 0        |
| 0        | 9.86E-05 | 0        | 0.006279 | 0.000953 | 6.57E-05 | 0.057694 | 0 | 0.001414 |
| 0        | 0        | 0        | 0.001052 | 0        | 0        | 0.018114 | 0 | 0.000756 |



|   |   |   |          |          |          |   |   |          |
|---|---|---|----------|----------|----------|---|---|----------|
| 0 | 0 | 0 | 0.004274 | 0        | 0        | 0 | 0 | 0        |
| 0 | 0 | 0 | 0.001118 | 0        | 0        | 0 | 0 | 0        |
| 0 | 0 | 0 | 0.00023  | 0        | 0        | 0 | 0 | 0        |
| 0 | 0 | 0 | 0.00023  | 0        | 0        | 0 | 0 | 0        |
| 0 | 0 | 0 | 0        | 0        | 0        | 0 | 0 | 0        |
| 0 | 0 | 0 | 0        | 0        | 0        | 0 | 0 | 0        |
| 0 | 0 | 0 | 3.29E-05 | 0        | 0        | 0 | 0 | 0        |
| 0 | 0 | 0 | 0        | 0        | 0        | 0 | 0 | 0        |
| 0 | 0 | 0 | 0.000164 | 0        | 3.29E-05 | 0 | 0 | 0        |
| 0 | 0 | 0 | 0        | 0        | 0        | 0 | 0 | 0        |
| 0 | 0 | 0 | 0        | 0        | 0        | 0 | 0 | 0        |
| 0 | 0 | 0 | 0        | 0        | 0        | 0 | 0 | 0        |
| 0 | 0 | 0 | 0        | 3.29E-05 | 0        | 0 | 0 | 0        |
| 0 | 0 | 0 | 0        | 0        | 0        | 0 | 0 | 0        |
| 0 | 0 | 0 | 0.006871 | 0        | 0        | 0 | 0 | 0        |
| 0 | 0 | 0 | 0.006772 | 0        | 0        | 0 | 0 | 0        |
| 0 | 0 | 0 | 0.000427 | 0        | 0        | 0 | 0 | 0        |
| 0 | 0 | 0 | 0.001644 | 0        | 0        | 0 | 0 | 0        |
| 0 | 0 | 0 | 0.001019 | 0        | 6.57E-05 | 0 | 0 | 0        |
| 0 | 0 | 0 | 0.000625 | 0        | 0        | 0 | 0 | 0        |
| 0 | 0 | 0 | 0        | 0        | 0        | 0 | 0 | 0        |
| 0 | 0 | 0 | 0        | 0        | 0        | 0 | 0 | 0        |
| 0 | 0 | 0 | 0        | 0        | 0        | 0 | 0 | 0        |
| 0 | 0 | 0 | 0        | 0        | 0        | 0 | 0 | 0        |
| 0 | 0 | 0 | 0.00046  | 0        | 0        | 0 | 0 | 0        |
| 0 | 0 | 0 | 6.57E-05 | 0        | 0        | 0 | 0 | 0        |
| 0 | 0 | 0 | 0.002301 | 0        | 0        | 0 | 0 | 0        |
| 0 | 0 | 0 | 3.29E-05 | 0        | 0        | 0 | 0 | 0        |
| 0 | 0 | 0 | 0.002761 | 0        | 0        | 0 | 0 | 0        |
| 0 | 0 | 0 | 3.29E-05 | 0        | 0        | 0 | 0 | 0        |
| 0 | 0 | 0 | 0        | 0        | 0        | 0 | 0 | 0        |
| 0 | 0 | 0 | 0        | 0        | 0        | 0 | 0 | 0        |
| 0 | 0 | 0 | 0        | 0        | 0        | 0 | 0 | 0        |
| 0 | 0 | 0 | 0        | 0        | 0        | 0 | 0 | 0        |
| 0 | 0 | 0 | 0        | 0        | 0        | 0 | 0 | 0        |
| 0 | 0 | 0 | 0.000427 | 0        | 0        | 0 | 0 | 0        |
| 0 | 0 | 0 | 0.002301 | 0        | 0        | 0 | 0 | 0        |
| 0 | 0 | 0 | 0        | 0        | 0        | 0 | 0 | 3.29E-05 |
| 0 | 0 | 0 | 0.007627 | 0        | 0        | 0 | 0 | 0        |
| 0 | 0 | 0 | 0.004208 | 0        | 0        | 0 | 0 | 0        |
| 0 | 0 | 0 | 0.001151 | 0        | 0        | 0 | 0 | 0        |
| 0 | 0 | 0 | 0        | 0        | 0        | 0 | 0 | 0        |
| 0 | 0 | 0 | 0.001052 | 0        | 0        | 0 | 0 | 0        |
| 0 | 0 | 0 | 3.29E-05 | 0        | 0        | 0 | 0 | 0        |
| 0 | 0 | 0 | 0        | 0        | 0        | 0 | 0 | 0        |
| 0 | 0 | 0 | 0.011933 | 0        | 0        | 0 | 0 | 0        |
| 0 | 0 | 0 | 6.57E-05 | 0        | 0        | 0 | 0 | 0        |

|   |   |          |          |   |   |   |   |   |
|---|---|----------|----------|---|---|---|---|---|
| 0 | 0 | 0        | 3.29E-05 | 0 | 0 | 0 | 0 | 0 |
| 0 | 0 | 0        | 0.000164 | 0 | 0 | 0 | 0 | 0 |
| 0 | 0 | 0        | 0        | 0 | 0 | 0 | 0 | 0 |
| 0 | 0 | 3.29E-05 | 0.003287 | 0 | 0 | 0 | 0 | 0 |
| 0 | 0 | 0        | 0.000263 | 0 | 0 | 0 | 0 | 0 |
| 0 | 0 | 0        | 3.29E-05 | 0 | 0 | 0 | 0 | 0 |
| 0 | 0 | 0        | 0        | 0 | 0 | 0 | 0 | 0 |
| 0 | 0 | 0        | 0        | 0 | 0 | 0 | 0 | 0 |
| 0 | 0 | 0        | 0        | 0 | 0 | 0 | 0 | 0 |
| 0 | 0 | 0        | 0        | 0 | 0 | 0 | 0 | 0 |
| 0 | 0 | 0        | 0        | 0 | 0 | 0 | 0 | 0 |
| 0 | 0 | 0        | 6.57E-05 | 0 | 0 | 0 | 0 | 0 |
| 0 | 0 | 0        | 0.000421 | 0 | 0 | 0 | 0 | 0 |
| 0 | 0 | 0        | 0.000789 | 0 | 0 | 0 | 0 | 0 |
| 0 | 0 | 0        | 3.29E-05 | 0 | 0 | 0 | 0 | 0 |
| 0 | 0 | 0        | 0.000953 | 0 | 0 | 0 | 0 | 0 |
| 0 | 0 | 0        | 0        | 0 | 0 | 0 | 0 | 0 |
| 0 | 0 | 0        | 0        | 0 | 0 | 0 | 0 | 0 |
| 0 | 0 | 0        | 0        | 0 | 0 | 0 | 0 | 0 |
| 0 | 0 | 0        | 0        | 0 | 0 | 0 | 0 | 0 |
| 0 | 0 | 0        | 0.005128 | 0 | 0 | 0 | 0 | 0 |
| 0 | 0 | 0        | 0.001216 | 0 | 0 | 0 | 0 | 0 |
| 0 | 0 | 0        | 0.001742 | 0 | 0 | 0 | 0 | 0 |
| 0 | 0 | 0        | 0.002137 | 0 | 0 | 0 | 0 | 0 |
| 0 | 0 | 0        | 0.003649 | 0 | 0 | 0 | 0 | 0 |
| 0 | 0 | 0        | 0.000329 | 0 | 0 | 0 | 0 | 0 |
| 0 | 0 | 0        | 0.000592 | 0 | 0 | 0 | 0 | 0 |
| 0 | 0 | 0        | 6.57E-05 | 0 | 0 | 0 | 0 | 0 |
| 0 | 0 | 0        | 0.000592 | 0 | 0 | 0 | 0 | 0 |
| 0 | 0 | 0        | 3.29E-05 | 0 | 0 | 0 | 0 | 0 |
| 0 | 0 | 0        | 0.002203 | 0 | 0 | 0 | 0 | 0 |
| 0 | 0 | 3.29E-05 | 0.000427 | 0 | 0 | 0 | 0 | 0 |
| 0 | 0 | 0        | 0.015385 | 0 | 0 | 0 | 0 | 0 |
| 0 | 0 | 0        | 0.009764 | 0 | 0 | 0 | 0 | 0 |
| 0 | 0 | 0        | 0.012689 | 0 | 0 | 0 | 0 | 0 |
| 0 | 0 | 0        | 0.010618 | 0 | 0 | 0 | 0 | 0 |
| 0 | 0 | 3.29E-05 | 0.003978 | 0 | 0 | 0 | 0 | 0 |
| 0 | 0 | 0        | 0.006246 | 0 | 0 | 0 | 0 | 0 |
| 0 | 0 | 0        | 0.003419 | 0 | 0 | 0 | 0 | 0 |
| 0 | 0 | 9.86E-05 | 0.025247 | 0 | 0 | 0 | 0 | 0 |
| 0 | 0 | 0        | 0.032447 | 0 | 0 | 0 | 0 | 0 |
| 0 | 0 | 0        | 0.001709 | 0 | 0 | 0 | 0 | 0 |
| 0 | 0 | 0        | 0.002761 | 0 | 0 | 0 | 0 | 0 |
| 0 | 0 | 0        | 0.005128 | 0 | 0 | 0 | 0 | 0 |
| 0 | 0 | 0        | 0.004011 | 0 | 0 | 0 | 0 | 0 |
| 0 | 0 | 0        | 0.012131 | 0 | 0 | 0 | 0 | 0 |



|   |   |          |          |   |          |   |   |   |
|---|---|----------|----------|---|----------|---|---|---|
| 0 | 0 | 0        | 0        | 0 | 0        | 0 | 0 | 0 |
| 0 | 0 | 0        | 3.29E-05 | 0 | 0        | 0 | 0 | 0 |
| 0 | 0 | 0        | 0        | 0 | 0        | 0 | 0 | 0 |
| 0 | 0 | 0        | 0        | 0 | 0        | 0 | 0 | 0 |
| 0 | 0 | 0        | 0        | 0 | 0        | 0 | 0 | 0 |
| 0 | 0 | 0        | 0        | 0 | 0        | 0 | 0 | 0 |
| 0 | 0 | 0        | 0        | 0 | 0        | 0 | 0 | 0 |
| 0 | 0 | 0        | 3.29E-05 | 0 | 0        | 0 | 0 | 0 |
| 0 | 0 | 0        | 0        | 0 | 0        | 0 | 0 | 0 |
| 0 | 0 | 0        | 0        | 0 | 0        | 0 | 0 | 0 |
| 0 | 0 | 0        | 0        | 0 | 0        | 0 | 0 | 0 |
| 0 | 0 | 0        | 0.002203 | 0 | 0        | 0 | 0 | 0 |
| 0 | 0 | 0        | 0.00092  | 0 | 0        | 0 | 0 | 0 |
| 0 | 0 | 0        | 0.004898 | 0 | 0        | 0 | 0 | 0 |
| 0 | 0 | 0        | 0.006969 | 0 | 0        | 0 | 0 | 0 |
| 0 | 0 | 0        | 3.29E-05 | 0 | 0        | 0 | 0 | 0 |
| 0 | 0 | 0        | 0        | 0 | 0        | 0 | 0 | 0 |
| 0 | 0 | 0        | 0        | 0 | 0        | 0 | 0 | 0 |
| 0 | 0 | 0        | 6.57E-05 | 0 | 0        | 0 | 0 | 0 |
| 0 | 0 | 0        | 0        | 0 | 0        | 0 | 0 | 0 |
| 0 | 0 | 0        | 0        | 0 | 0        | 0 | 0 | 0 |
| 0 | 0 | 0        | 0        | 0 | 0        | 0 | 0 | 0 |
| 0 | 0 | 0        | 6.57E-05 | 0 | 0        | 0 | 0 | 0 |
| 0 | 0 | 0        | 0.000197 | 0 | 0        | 0 | 0 | 0 |
| 0 | 0 | 0        | 0        | 0 | 0        | 0 | 0 | 0 |
| 0 | 0 | 0        | 0.000164 | 0 | 0        | 0 | 0 | 0 |
| 0 | 0 | 0        | 0.012163 | 0 | 0        | 0 | 0 | 0 |
| 0 | 0 | 0        | 0.006509 | 0 | 0        | 0 | 0 | 0 |
| 0 | 0 | 0        | 0.001151 | 0 | 6.57E-05 | 0 | 0 | 0 |
| 0 | 0 | 0        | 0.001019 | 0 | 0        | 0 | 0 | 0 |
| 0 | 0 | 0        | 0.001249 | 0 | 0        | 0 | 0 | 0 |
| 0 | 0 | 0        | 0        | 0 | 0        | 0 | 0 | 0 |
| 0 | 0 | 0        | 0        | 0 | 0        | 0 | 0 | 0 |
| 0 | 0 | 0        | 0.00046  | 0 | 0        | 0 | 0 | 0 |
| 0 | 0 | 0        | 0.002433 | 0 | 0        | 0 | 0 | 0 |
| 0 | 0 | 0        | 0.000493 | 0 | 0        | 0 | 0 | 0 |
| 0 | 0 | 0        | 0.000362 | 0 | 0        | 0 | 0 | 0 |
| 0 | 0 | 0        | 9.86E-05 | 0 | 0        | 0 | 0 | 0 |
| 0 | 0 | 0        | 0.003419 | 0 | 0        | 0 | 0 | 0 |
| 0 | 0 | 0        | 0.003123 | 0 | 0        | 0 | 0 | 0 |
| 0 | 0 | 0        | 0.004504 | 0 | 0        | 0 | 0 | 0 |
| 0 | 0 | 0        | 0.127848 | 0 | 0        | 0 | 0 | 0 |
| 0 | 0 | 0        | 0.0048   | 0 | 0        | 0 | 0 | 0 |
| 0 | 0 | 0        | 0.009139 | 0 | 0        | 0 | 0 | 0 |
| 0 | 0 | 0        | 0.010914 | 0 | 0        | 0 | 0 | 0 |
| 0 | 0 | 0        | 0.007561 | 0 | 0        | 0 | 0 | 0 |
| 0 | 0 | 6.57E-05 | 0.011637 | 0 | 0        | 0 | 0 | 0 |

|   |   |          |          |   |          |   |   |   |
|---|---|----------|----------|---|----------|---|---|---|
| 0 | 0 | 0        | 0.010158 | 0 | 0        | 0 | 0 | 0 |
| 0 | 0 | 0        | 0.001512 | 0 | 0        | 0 | 0 | 0 |
| 0 | 0 | 0        | 0.003189 | 0 | 0        | 0 | 0 | 0 |
| 0 | 0 | 0        | 9.86E-05 | 0 | 0        | 0 | 0 | 0 |
| 0 | 0 | 0        | 0.000625 | 0 | 0        | 0 | 0 | 0 |
| 0 | 0 | 0        | 9.86E-05 | 0 | 0        | 0 | 0 | 0 |
| 0 | 0 | 0        | 0.006082 | 0 | 0        | 0 | 0 | 0 |
| 0 | 0 | 0        | 0        | 0 | 0        | 0 | 0 | 0 |
| 0 | 0 | 0        | 9.86E-05 | 0 | 0        | 0 | 0 | 0 |
| 0 | 0 | 0        | 0.00549  | 0 | 0        | 0 | 0 | 0 |
| 0 | 0 | 0        | 0        | 0 | 0        | 0 | 0 | 0 |
| 0 | 0 | 0        | 0.040534 | 0 | 0        | 0 | 0 | 0 |
| 0 | 0 | 0        | 0        | 0 | 0        | 0 | 0 | 0 |
| 0 | 0 | 0        | 0.000756 | 0 | 0        | 0 | 0 | 0 |
| 0 | 0 | 0        | 0.012689 | 0 | 0        | 0 | 0 | 0 |
| 0 | 0 | 0        | 0.005819 | 0 | 0        | 0 | 0 | 0 |
| 0 | 0 | 0        | 0.000164 | 0 | 0        | 0 | 0 | 0 |
| 0 | 0 | 0        | 0.002268 | 0 | 0        | 0 | 0 | 0 |
| 0 | 0 | 0        | 0.00332  | 0 | 0        | 0 | 0 | 0 |
| 0 | 0 | 0        | 0.005227 | 0 | 0        | 0 | 0 | 0 |
| 0 | 0 | 0        | 0.013281 | 0 | 0        | 0 | 0 | 0 |
| 0 | 0 | 0        | 0.004734 | 0 | 0        | 0 | 0 | 0 |
| 0 | 0 | 0        | 6.57E-05 | 0 | 0        | 0 | 0 | 0 |
| 0 | 0 | 0        | 0.000362 | 0 | 0        | 0 | 0 | 0 |
| 0 | 0 | 0        | 9.86E-05 | 0 | 0        | 0 | 0 | 0 |
| 0 | 0 | 0        | 0        | 0 | 0        | 0 | 0 | 0 |
| 0 | 0 | 0        | 0        | 0 | 0        | 0 | 0 | 0 |
| 0 | 0 | 0        | 0        | 0 | 0        | 0 | 0 | 0 |
| 0 | 0 | 0        | 0.000131 | 0 | 0        | 0 | 0 | 0 |
| 0 | 0 | 0        | 0        | 0 | 0        | 0 | 0 | 0 |
| 0 | 0 | 0        | 0        | 0 | 0        | 0 | 0 | 0 |
| 0 | 0 | 0        | 0        | 0 | 0        | 0 | 0 | 0 |
| 0 | 0 | 0        | 0.005227 | 0 | 0        | 0 | 0 | 0 |
| 0 | 0 | 0        | 0.000329 | 0 | 0        | 0 | 0 | 0 |
| 0 | 0 | 0        | 0.004471 | 0 | 0        | 0 | 0 | 0 |
| 0 | 0 | 0        | 0.01006  | 0 | 0        | 0 | 0 | 0 |
| 0 | 0 | 0        | 0        | 0 | 0        | 0 | 0 | 0 |
| 0 | 0 | 0        | 9.86E-05 | 0 | 9.86E-05 | 0 | 0 | 0 |
| 0 | 0 | 0        | 0.002137 | 0 | 0        | 0 | 0 | 0 |
| 0 | 0 | 0        | 0.000855 | 0 | 0        | 0 | 0 | 0 |
| 0 | 0 | 0        | 0.00023  | 0 | 0        | 0 | 0 | 0 |
| 0 | 0 | 0        | 0.000197 | 0 | 0        | 0 | 0 | 0 |
| 0 | 0 | 0        | 0.003452 | 0 | 0        | 0 | 0 | 0 |
| 0 | 0 | 0        | 0.001479 | 0 | 0        | 0 | 0 | 0 |
| 0 | 0 | 3.29E-05 | 0.000756 | 0 | 0        | 0 | 0 | 0 |
| 0 | 0 | 3.29E-05 | 0.001052 | 0 | 0        | 0 | 0 | 0 |
| 0 | 0 | 0        | 0.00069  | 0 | 0        | 0 | 0 | 0 |

|   |   |          |          |   |          |   |   |   |
|---|---|----------|----------|---|----------|---|---|---|
| 0 | 0 | 0        | 0.003879 | 0 | 0        | 0 | 0 | 0 |
| 0 | 0 | 3.29E-05 | 0.005819 | 0 | 0        | 0 | 0 | 0 |
| 0 | 0 | 0        | 0.001841 | 0 | 0        | 0 | 0 | 0 |
| 0 | 0 | 0        | 0.006016 | 0 | 0        | 0 | 0 | 0 |
| 0 | 0 | 0        | 0        | 0 | 0        | 0 | 0 | 0 |
| 0 | 0 | 0        | 0.000131 | 0 | 0        | 0 | 0 | 0 |
| 0 | 0 | 9.86E-05 | 0.037641 | 0 | 0        | 0 | 0 | 0 |
| 0 | 0 | 0.000329 | 0.040632 | 0 | 0        | 0 | 0 | 0 |
| 0 | 0 | 0.000197 | 0.091949 | 0 | 0        | 0 | 0 | 0 |
| 0 | 0 | 0.000164 | 0.031526 | 0 | 0        | 0 | 0 | 0 |
| 0 | 0 | 3.29E-05 | 0.00835  | 0 | 0        | 0 | 0 | 0 |
| 0 | 0 | 0.000723 | 0.033696 | 0 | 0        | 0 | 0 | 0 |
| 0 | 0 | 6.57E-05 | 0.038233 | 0 | 0        | 0 | 0 | 0 |
| 0 | 0 | 6.57E-05 | 0.051415 | 0 | 0        | 0 | 0 | 0 |
| 0 | 0 | 0        | 6.57E-05 | 0 | 0        | 0 | 0 | 0 |
| 0 | 0 | 0        | 6.57E-05 | 0 | 0        | 0 | 0 | 0 |
| 0 | 0 | 0        | 0        | 0 | 0        | 0 | 0 | 0 |
| 0 | 0 | 0        | 0.000362 | 0 | 0        | 0 | 0 | 0 |
| 0 | 0 | 0        | 0        | 0 | 0        | 0 | 0 | 0 |
| 0 | 0 | 0        | 0        | 0 | 0        | 0 | 0 | 0 |
| 0 | 0 | 0        | 0        | 0 | 0        | 0 | 0 | 0 |
| 0 | 0 | 0        | 0        | 0 | 0        | 0 | 0 | 0 |
| 0 | 0 | 0        | 0        | 0 | 0        | 0 | 0 | 0 |
| 0 | 0 | 0        | 0        | 0 | 0        | 0 | 0 | 0 |
| 0 | 0 | 0        | 0        | 0 | 0        | 0 | 0 | 0 |
| 0 | 0 | 0        | 0        | 0 | 0        | 0 | 0 | 0 |
| 0 | 0 | 0        | 3.29E-05 | 0 | 0        | 0 | 0 | 0 |
| 0 | 0 | 0        | 0.001841 | 0 | 0        | 0 | 0 | 0 |
| 0 | 0 | 0        | 0.00457  | 0 | 0        | 0 | 0 | 0 |
| 0 | 0 | 0        | 0.002597 | 0 | 0        | 0 | 0 | 0 |
| 0 | 0 | 0        | 0.000657 | 0 | 0        | 0 | 0 | 0 |
| 0 | 0 | 0        | 0.000131 | 0 | 0        | 0 | 0 | 0 |
| 0 | 0 | 0        | 0        | 0 | 0        | 0 | 0 | 0 |
| 0 | 0 | 0        | 0        | 0 | 6.57E-05 | 0 | 0 | 0 |
| 0 | 0 | 0        | 0.000559 | 0 | 0        | 0 | 0 | 0 |
| 0 | 0 | 0        | 0.002005 | 0 | 0        | 0 | 0 | 0 |
| 0 | 0 | 0        | 0.000822 | 0 | 0        | 0 | 0 | 0 |
| 0 | 0 | 0        | 0.00023  | 0 | 0        | 0 | 0 | 0 |
| 0 | 0 | 0        | 3.29E-05 | 0 | 0        | 0 | 0 | 0 |
| 0 | 0 | 0        | 0.000526 | 0 | 0        | 0 | 0 | 0 |
| 0 | 0 | 0        | 3.29E-05 | 0 | 0        | 0 | 0 | 0 |
| 0 | 0 | 0        | 0        | 0 | 0        | 0 | 0 | 0 |
| 0 | 0 | 0        | 0        | 0 | 0        | 0 | 0 | 0 |
| 0 | 0 | 0        | 0        | 0 | 0        | 0 | 0 | 0 |
| 0 | 0 | 0        | 0        | 0 | 0        | 0 | 0 | 0 |
| 0 | 0 | 0        | 0        | 0 | 0        | 0 | 0 | 0 |
| 0 | 0 | 0        | 3.29E-05 | 0 | 0        | 0 | 0 | 0 |
| 0 | 0 | 0        | 0.000855 | 0 | 0        | 0 | 0 | 0 |
| 0 | 0 | 0        | 0.00046  | 0 | 0        | 0 | 0 | 0 |
| 0 | 0 | 0        | 0.001085 | 0 | 0        | 0 | 0 | 0 |







|          |   |          |          |          |   |   |   |   |
|----------|---|----------|----------|----------|---|---|---|---|
| 3.29E-05 | 0 | 0        | 0        | 0        | 0 | 0 | 0 | 0 |
| 0        | 0 | 0        | 0        | 0        | 0 | 0 | 0 | 0 |
| 0        | 0 | 0        | 3.29E-05 | 0        | 0 | 0 | 0 | 0 |
| 0        | 0 | 0        | 0        | 0.000822 | 0 | 0 | 0 | 0 |
| 0        | 0 | 0        | 0        | 0        | 0 | 0 | 0 | 0 |
| 0        | 0 | 0.000131 | 0.023176 | 0        | 0 | 0 | 0 | 0 |
| 0        | 0 | 3.29E-05 | 0.019396 | 0        | 0 | 0 | 0 | 0 |
| 0        | 0 | 0        | 0.006147 | 0        | 0 | 0 | 0 | 0 |
| 0        | 0 | 6.57E-05 | 0.028305 | 0        | 0 | 0 | 0 | 0 |
| 0        | 0 | 0        | 0.016897 | 0        | 0 | 0 | 0 | 0 |
| 0        | 0 | 3.29E-05 | 0.073309 | 0        | 0 | 0 | 0 | 0 |
| 0        | 0 | 0        | 0.00332  | 0        | 0 | 0 | 0 | 0 |
| 0        | 0 | 0        | 0.01933  | 0        | 0 | 0 | 0 | 0 |
| 0        | 0 | 0        | 0.074296 | 0        | 0 | 0 | 0 | 0 |
| 0        | 0 | 0        | 0.01739  | 0        | 0 | 0 | 0 | 0 |
| 0        | 0 | 0        | 0.004471 | 0        | 0 | 0 | 0 | 0 |
| 0        | 0 | 0        | 0.002729 | 0        | 0 | 0 | 0 | 0 |
| 0        | 0 | 0        | 0.006936 | 0        | 0 | 0 | 0 | 0 |
| 0        | 0 | 0        | 0.004438 | 0        | 0 | 0 | 0 | 0 |
| 0        | 0 | 0        | 0.007068 | 0        | 0 | 0 | 0 | 0 |
| 0        | 0 | 0        | 0.009106 | 0        | 0 | 0 | 0 | 0 |
| 0        | 0 | 0        | 0.000493 | 0        | 0 | 0 | 0 | 0 |
| 0        | 0 | 0        | 0.000559 | 0        | 0 | 0 | 0 | 0 |
| 0        | 0 | 0        | 0.000296 | 0        | 0 | 0 | 0 | 0 |
| 0        | 0 | 0        | 0.005161 | 0        | 0 | 0 | 0 | 0 |
| 0        | 0 | 0        | 0.077846 | 0        | 0 | 0 | 0 | 0 |
| 0        | 0 | 0        | 0.012788 | 0        | 0 | 0 | 0 | 0 |
| 0        | 0 | 0        | 0.001414 | 0        | 0 | 0 | 0 | 0 |
| 0        | 0 | 0        | 0.006772 | 0        | 0 | 0 | 0 | 0 |
| 0        | 0 | 0        | 0.094678 | 0        | 0 | 0 | 0 | 0 |
| 0        | 0 | 0.001183 | 0.05158  | 0        | 0 | 0 | 0 | 0 |
| 0        | 0 | 9.86E-05 | 0.001907 | 0        | 0 | 0 | 0 | 0 |
| 0        | 0 | 0        | 0.011802 | 0        | 0 | 0 | 0 | 0 |
| 0        | 0 | 0        | 0        | 0        | 0 | 0 | 0 | 0 |
| 0        | 0 | 0        | 0        | 0        | 0 | 0 | 0 | 0 |
| 0        | 0 | 0        | 0.00263  | 0        | 0 | 0 | 0 | 0 |
| 0        | 0 | 0        | 0.000197 | 0        | 0 | 0 | 0 | 0 |
| 0        | 0 | 0        | 6.57E-05 | 0        | 0 | 0 | 0 | 0 |
| 0        | 0 | 0        | 9.86E-05 | 0        | 0 | 0 | 0 | 0 |
| 0        | 0 | 0        | 0        | 0        | 0 | 0 | 0 | 0 |
| 0        | 0 | 0        | 0.00092  | 0        | 0 | 0 | 0 | 0 |
| 0        | 0 | 0        | 0        | 0        | 0 | 0 | 0 | 0 |
| 0        | 0 | 0        | 0        | 0        | 0 | 0 | 0 | 0 |
| 0        | 0 | 0        | 0        | 0        | 0 | 0 | 0 | 0 |
| 0        | 0 | 0        | 0        | 0        | 0 | 0 | 0 | 0 |
| 0        | 0 | 0        | 3.29E-05 | 0        | 0 | 0 | 0 | 0 |
| 0        | 0 | 0        | 6.57E-05 | 0        | 0 | 0 | 0 | 0 |

|   |          |          |          |   |          |   |          |   |
|---|----------|----------|----------|---|----------|---|----------|---|
| 0 | 0        | 0        | 0        | 0 | 0        | 0 | 0        | 0 |
| 0 | 0        | 0        | 0.001151 | 0 | 0        | 0 | 0        | 0 |
| 0 | 0        | 0        | 0.00069  | 0 | 0        | 0 | 0        | 0 |
| 0 | 0        | 0        | 0        | 0 | 0        | 0 | 0        | 0 |
| 0 | 0        | 0        | 3.29E-05 | 0 | 0        | 0 | 0        | 0 |
| 0 | 0        | 0        | 0        | 0 | 0        | 0 | 0        | 0 |
| 0 | 0        | 0        | 0        | 0 | 0        | 0 | 0        | 0 |
| 0 | 0        | 0        | 0        | 0 | 0        | 0 | 0        | 0 |
| 0 | 0        | 0        | 3.29E-05 | 0 | 0        | 0 | 0        | 0 |
| 0 | 0        | 0        | 0.00572  | 0 | 0        | 0 | 0        | 0 |
| 0 | 0        | 0        | 6.57E-05 | 0 | 0        | 0 | 0        | 0 |
| 0 | 0        | 0        | 0        | 0 | 0        | 0 | 0        | 0 |
| 0 | 0        | 0        | 9.86E-05 | 0 | 0        | 0 | 0        | 0 |
| 0 | 0        | 0        | 0.004372 | 0 | 0        | 0 | 0        | 0 |
| 0 | 0        | 0        | 0.000131 | 0 | 0        | 0 | 0        | 0 |
| 0 | 0        | 0        | 0        | 0 | 0        | 0 | 0        | 0 |
| 0 | 0        | 0        | 3.29E-05 | 0 | 3.29E-05 | 0 | 3.29E-05 | 0 |
| 0 | 0        | 0        | 0        | 0 | 0        | 0 | 0        | 0 |
| 0 | 0        | 0        | 0        | 0 | 0        | 0 | 0        | 0 |
| 0 | 0        | 0        | 3.29E-05 | 0 | 0        | 0 | 0        | 0 |
| 0 | 0        | 0        | 0        | 0 | 0        | 0 | 0        | 0 |
| 0 | 0        | 0        | 6.57E-05 | 0 | 0        | 0 | 0        | 0 |
| 0 | 0        | 0        | 9.86E-05 | 0 | 0        | 0 | 0        | 0 |
| 0 | 0        | 0        | 0        | 0 | 0        | 0 | 0        | 0 |
| 0 | 0        | 0        | 0.000329 | 0 | 0        | 0 | 0        | 0 |
| 0 | 0        | 0        | 0        | 0 | 0        | 0 | 0        | 0 |
| 0 | 0        | 0        | 0        | 0 | 0        | 0 | 0        | 0 |
| 0 | 0        | 0        | 0.001841 | 0 | 0        | 0 | 0        | 0 |
| 0 | 0        | 0        | 0.029685 | 0 | 0        | 0 | 0        | 0 |
| 0 | 0        | 0        | 0.00194  | 0 | 0        | 0 | 0        | 0 |
| 0 | 0        | 0        | 0.00023  | 0 | 0        | 0 | 0        | 0 |
| 0 | 0        | 0        | 0.000329 | 0 | 0        | 0 | 0        | 0 |
| 0 | 0        | 0        | 0.003386 | 0 | 0        | 0 | 0        | 0 |
| 0 | 0        | 0        | 0.001348 | 0 | 0        | 0 | 0        | 0 |
| 0 | 3.29E-05 | 9.86E-05 | 0.01578  | 0 | 0        | 0 | 0        | 0 |
| 0 | 0        | 0        | 0.000362 | 0 | 0        | 0 | 0        | 0 |
| 0 | 0        | 0        | 0.04678  | 0 | 0        | 0 | 0        | 0 |
| 0 | 0        | 0        | 0.00263  | 0 | 0        | 0 | 0        | 0 |
| 0 | 0        | 0        | 0.000625 | 0 | 0        | 0 | 0        | 0 |
| 0 | 0        | 0        | 0.009665 | 0 | 0        | 0 | 0        | 0 |
| 0 | 0        | 0        | 0.004372 | 0 | 0        | 0 | 0        | 0 |
| 0 | 0.000164 | 3.29E-05 | 0.034617 | 0 | 0        | 0 | 0        | 0 |
| 0 | 0        | 0        | 0.004471 | 0 | 0        | 0 | 0        | 0 |
| 0 | 0.000164 | 0.000164 | 0.014399 | 0 | 0        | 0 | 0        | 0 |
| 0 | 0.000164 | 9.86E-05 | 0.017127 | 0 | 0        | 0 | 0        | 0 |
| 0 | 3.29E-05 | 0        | 0.000855 | 0 | 0        | 0 | 0        | 0 |
| 0 | 0        | 0        | 0.001052 | 0 | 0        | 0 | 0        | 0 |



|   |   |          |          |   |   |          |   |   |
|---|---|----------|----------|---|---|----------|---|---|
| 0 | 0 | 0        | 0.007462 | 0 | 0 | 0        | 0 | 0 |
| 0 | 0 | 0        | 0        | 0 | 0 | 0        | 0 | 0 |
| 0 | 0 | 0        | 0        | 0 | 0 | 0        | 0 | 0 |
| 0 | 0 | 0        | 0        | 0 | 0 | 0        | 0 | 0 |
| 0 | 0 | 0        | 0        | 0 | 0 | 0        | 0 | 0 |
| 0 | 0 | 6.57E-05 | 0.006246 | 0 | 0 | 0        | 0 | 0 |
| 0 | 0 | 0.00023  | 0.043591 | 0 | 0 | 0        | 0 | 0 |
| 0 | 0 | 0        | 0.042736 | 0 | 0 | 0        | 0 | 0 |
| 0 | 0 | 0        | 0.000197 | 0 | 0 | 3.29E-05 | 0 | 0 |
| 0 | 0 | 3.29E-05 | 0.012426 | 0 | 0 | 0        | 0 | 0 |
| 0 | 0 | 0        | 0.000888 | 0 | 0 | 0        | 0 | 0 |
| 0 | 0 | 0        | 0        | 0 | 0 | 0        | 0 | 0 |
| 0 | 0 | 0        | 0.000625 | 0 | 0 | 0        | 0 | 0 |
| 0 | 0 | 0        | 0.001545 | 0 | 0 | 0        | 0 | 0 |
| 0 | 0 | 0        | 0.000625 | 0 | 0 | 0        | 0 | 0 |
| 0 | 0 | 3.29E-05 | 0.001151 | 0 | 0 | 0        | 0 | 0 |
| 0 | 0 | 0        | 0.000526 | 0 | 0 | 0        | 0 | 0 |
| 0 | 0 | 0        | 0.003189 | 0 | 0 | 0        | 0 | 0 |
| 0 | 0 | 3.29E-05 | 0.006673 | 0 | 0 | 0        | 0 | 0 |
| 0 | 0 | 0        | 0.000164 | 0 | 0 | 0        | 0 | 0 |
| 0 | 0 | 0.000131 | 0.006641 | 0 | 0 | 0        | 0 | 0 |
| 0 | 0 | 0        | 0.005424 | 0 | 0 | 0        | 0 | 0 |
| 0 | 0 | 0        | 0.000362 | 0 | 0 | 0        | 0 | 0 |

| k_Bacteri |
|-----------|-----------|-----------|-----------|-----------|-----------|-----------|-----------|-----------|
| 0         | 0         | 0         | 0         | 0         | 0         | 0.000723  | 0         | 0         |
| 0         | 0         | 0         | 0         | 0         | 0         | 9.86E-05  | 0         | 0         |
| 0         | 0         | 0         | 0         | 0         | 0         | 9.86E-05  | 0         | 0         |
| 0         | 0         | 0         | 0         | 0         | 0         | 0         | 0         | 0         |
| 0         | 3.29E-05  | 0         | 0         | 0         | 0         | 0.000493  | 0         | 0         |
| 0         | 0         | 0         | 0         | 0         | 0         | 3.29E-05  | 0         | 0         |
| 0         | 3.29E-05  | 0         | 0         | 0         | 0         | 3.29E-05  | 0         | 0         |
| 0         | 0         | 0         | 0         | 0         | 0         | 3.29E-05  | 0         | 0         |
| 0         | 0.000526  | 0         | 0         | 0         | 0         | 0         | 0         | 0         |
| 0         | 3.29E-05  | 0         | 0         | 0         | 0         | 9.86E-05  | 0         | 0         |
| 0         | 0         | 0         | 0         | 0         | 0         | 0         | 0         | 0         |
| 0         | 0.000427  | 0         | 0         | 0         | 0         | 0.000164  | 0         | 0         |
| 0         | 0.00069   | 0         | 0         | 0         | 0         | 3.29E-05  | 0         | 0         |
| 0         | 0.000197  | 0.0143    | 0         | 0         | 0         | 9.86E-05  | 6.57E-05  | 0         |
| 0         | 0         | 0         | 0         | 0         | 0         | 0         | 0         | 0         |
| 0         | 0         | 0         | 0         | 0         | 0         | 0         | 0         | 0         |
| 0         | 0         | 0         | 0         | 0         | 0         | 0         | 0         | 0         |
| 0         | 0         | 0         | 0         | 0         | 0         | 0         | 0         | 0         |
| 0         | 0         | 0         | 0         | 0         | 0         | 0         | 0         | 0         |
| 0         | 0         | 3.29E-05  | 0         | 0         | 0         | 0         | 6.57E-05  | 0         |
| 0         | 0.000559  | 0         | 0         | 0         | 0         | 0.000953  | 0         | 0         |
| 0         | 0.001381  | 0         | 0         | 0         | 0         | 0.000197  | 0         | 0         |
| 0         | 6.57E-05  | 0         | 0         | 0         | 0         | 0.00023   | 0         | 0         |
| 0         | 0.000822  | 0         | 0         | 0         | 0         | 0.000559  | 0         | 0         |
| 0         | 0.000756  | 0         | 0         | 0         | 0         | 0         | 0         | 0         |
| 0         | 0.004241  | 0         | 0         | 0         | 0         | 0.00046   | 0         | 0         |
| 0         | 0.001151  | 0         | 0         | 0         | 0         | 9.86E-05  | 0         | 0         |
| 0         | 0.000263  | 0         | 0         | 0         | 0         | 0         | 0         | 0         |
| 0         | 0.000888  | 0         | 0         | 0         | 0         | 0         | 0         | 9.86E-05  |
| 0         | 0.000888  | 0         | 0         | 0         | 0         | 0         | 0         | 0         |
| 0         | 0.001972  | 0         | 0         | 0         | 0         | 0         | 0         | 0         |
| 0         | 0.001085  | 0         | 0         | 0         | 0         | 0         | 0         | 0         |
| 0         | 0.001019  | 0         | 0         | 0         | 0         | 0         | 0         | 0         |
| 0         | 0.000953  | 0         | 0         | 0         | 0         | 9.86E-05  | 0         | 0         |
| 0         | 0.001348  | 0         | 0         | 0         | 0         | 0.000394  | 0         | 0         |
| 0         | 0.000625  | 0         | 0         | 0         | 0         | 0         | 0         | 0         |
| 0         | 0.001545  | 0         | 0         | 0         | 0         | 9.86E-05  | 0         | 0         |
| 0         | 0.002498  | 0         | 0         | 0         | 0         | 6.57E-05  | 0         | 0         |
| 0         | 0.001841  | 0         | 0         | 0         | 0         | 0.000164  | 0         | 0         |
| 0         | 0.003287  | 0         | 0         | 0         | 0         | 0.000592  | 0         | 0         |
| 0         | 0.001085  | 0         | 0         | 0         | 0         | 9.86E-05  | 0         | 0         |
| 0         | 0.001907  | 0         | 0         | 0         | 0         | 0.000164  | 0         | 0         |
| 0         | 0.00194   | 0         | 0         | 0         | 0         | 3.29E-05  | 0         | 0         |
| 0         | 0         | 0         | 0         | 0         | 0         | 0.000329  | 0         | 0         |





|   |          |          |   |   |   |          |          |   |
|---|----------|----------|---|---|---|----------|----------|---|
| 0 | 3.29E-05 | 0        | 0 | 0 | 0 | 0        | 0        | 0 |
| 0 | 0        | 0        | 0 | 0 | 0 | 0        | 0        | 0 |
| 0 | 0        | 0        | 0 | 0 | 0 | 0        | 0        | 0 |
| 0 | 0.000855 | 0        | 0 | 0 | 0 | 9.86E-05 | 0        | 0 |
| 0 | 0        | 0        | 0 | 0 | 0 | 0        | 0        | 0 |
| 0 | 3.29E-05 | 0        | 0 | 0 | 0 | 9.86E-05 | 0        | 0 |
| 0 | 0        | 0        | 0 | 0 | 0 | 0        | 0        | 0 |
| 0 | 0        | 0        | 0 | 0 | 0 | 6.57E-05 | 0        | 0 |
| 0 | 0        | 0        | 0 | 0 | 0 | 0.00023  | 0        | 0 |
| 0 | 0.001808 | 0        | 0 | 0 | 0 | 0.000953 | 0        | 0 |
| 0 | 0.000723 | 0        | 0 | 0 | 0 | 0.000592 | 0        | 0 |
| 0 | 0.001052 | 0        | 0 | 0 | 0 | 0.000559 | 0        | 0 |
| 0 | 0.000421 | 0        | 0 | 0 | 0 | 0.000281 | 0        | 0 |
| 0 | 9.86E-05 | 0        | 0 | 0 | 0 | 0.000131 | 0        | 0 |
| 0 | 3.29E-05 | 0        | 0 | 0 | 0 | 0        | 0        | 0 |
| 0 | 0        | 0        | 0 | 0 | 0 | 0        | 0        | 0 |
| 0 | 0        | 0        | 0 | 0 | 0 | 0        | 0        | 0 |
| 0 | 0        | 0        | 0 | 0 | 0 | 0.00023  | 0        | 0 |
| 0 | 0        | 0        | 0 | 0 | 0 | 0        | 0        | 0 |
| 0 | 3.29E-05 | 0        | 0 | 0 | 0 | 0        | 0.000131 | 0 |
| 0 | 3.29E-05 | 0        | 0 | 0 | 0 | 0.000197 | 3.29E-05 | 0 |
| 0 | 0.004997 | 0        | 0 | 0 | 0 | 0.001052 | 0        | 0 |
| 0 | 0.005161 | 0        | 0 | 0 | 0 | 0.00046  | 0        | 0 |
| 0 | 0.001381 | 0        | 0 | 0 | 0 | 0.00069  | 0        | 0 |
| 0 | 0.001775 | 0        | 0 | 0 | 0 | 0.000197 | 0        | 0 |
| 0 | 0.003682 | 0        | 0 | 0 | 0 | 0.001874 | 0        | 0 |
| 0 | 0.000559 | 0        | 0 | 0 | 0 | 0        | 0        | 0 |
| 0 | 0.006608 | 0        | 0 | 0 | 0 | 0.000362 | 0        | 0 |
| 0 | 3.29E-05 | 0        | 0 | 0 | 0 | 3.29E-05 | 0        | 0 |
| 0 | 0.000131 | 0        | 0 | 0 | 0 | 0        | 0        | 0 |
| 0 | 0.000197 | 0        | 0 | 0 | 0 | 0        | 0        | 0 |
| 0 | 0.001414 | 0        | 0 | 0 | 0 | 0.000559 | 0        | 0 |
| 0 | 0.021565 | 0        | 0 | 0 | 0 | 0.000164 | 0        | 0 |
| 0 | 0.002071 | 0        | 0 | 0 | 0 | 0.000131 | 0        | 0 |
| 0 | 0.00286  | 0        | 0 | 0 | 0 | 6.57E-05 | 0        | 0 |
| 0 | 0.001512 | 0        | 0 | 0 | 0 | 6.57E-05 | 0        | 0 |
| 0 | 0.004997 | 0        | 0 | 0 | 0 | 0.002367 | 0        | 0 |
| 0 | 0.000789 | 0        | 0 | 0 | 0 | 9.86E-05 | 0        | 0 |
| 0 | 0.001216 | 0        | 0 | 0 | 0 | 9.86E-05 | 0        | 0 |
| 0 | 0.001052 | 0        | 0 | 0 | 0 | 0        | 0        | 0 |
| 0 | 0.017555 | 9.86E-05 | 0 | 0 | 0 | 0.004044 | 0        | 0 |
| 0 | 0.013446 | 0        | 0 | 0 | 0 | 0.004734 | 0        | 0 |
| 0 | 0.00194  | 0        | 0 | 0 | 0 | 0.000888 | 0        | 0 |
| 0 | 0.00217  | 0        | 0 | 0 | 0 | 0.000164 | 0        | 0 |
| 0 | 0.006904 | 0        | 0 | 0 | 0 | 0.000625 | 0        | 0 |
| 0 | 0.005589 | 0        | 0 | 0 | 0 | 0.000296 | 0        | 0 |
| 0 | 0.003649 | 0        | 0 | 0 | 0 | 0.00046  | 0        | 0 |



|   |          |          |          |   |   |          |          |   |
|---|----------|----------|----------|---|---|----------|----------|---|
| 0 | 3.29E-05 | 0        | 0        | 0 | 0 | 0        | 0        | 0 |
| 0 | 3.29E-05 | 0        | 0        | 0 | 0 | 0        | 0        | 0 |
| 0 | 0        | 0        | 0        | 0 | 0 | 0        | 0.000164 | 0 |
| 0 | 6.57E-05 | 0        | 0        | 0 | 0 | 0        | 0        | 0 |
| 0 | 0        | 0        | 0        | 0 | 0 | 0        | 0        | 0 |
| 0 | 0.001414 | 0        | 0        | 0 | 0 | 0.000296 | 0        | 0 |
| 0 | 0.000362 | 0        | 0        | 0 | 0 | 6.57E-05 | 0        | 0 |
| 0 | 0.000131 | 0        | 0        | 0 | 0 | 6.57E-05 | 0        | 0 |
| 0 | 0.000789 | 0        | 0        | 0 | 0 | 0        | 3.29E-05 | 0 |
| 0 | 0.001315 | 6.57E-05 | 0        | 0 | 0 | 0.000756 | 6.57E-05 | 0 |
| 0 | 0.000723 | 0        | 0        | 0 | 0 | 3.29E-05 | 0        | 0 |
| 0 | 0.00572  | 0        | 0        | 0 | 0 | 0.001414 | 0        | 0 |
| 0 | 0.001414 | 0        | 0        | 0 | 0 | 0.000197 | 0        | 0 |
| 0 | 0.001249 | 0        | 0        | 0 | 0 | 6.57E-05 | 0        | 0 |
| 0 | 0.007528 | 0        | 0        | 0 | 0 | 9.86E-05 | 0        | 0 |
| 0 | 0        | 0        | 0        | 0 | 0 | 0.000263 | 0        | 0 |
| 0 | 0        | 0        | 0        | 0 | 0 | 0.001085 | 0        | 0 |
| 0 | 0        | 0        | 0        | 0 | 0 | 0.000394 | 0        | 0 |
| 0 | 0        | 0        | 0        | 0 | 0 | 0.000427 | 0        | 0 |
| 0 | 0        | 0        | 0        | 0 | 0 | 0        | 0        | 0 |
| 0 | 0        | 0        | 0        | 0 | 0 | 0.000526 | 0        | 0 |
| 0 | 3.29E-05 | 0        | 0        | 0 | 0 | 0.000756 | 0        | 0 |
| 0 | 0.001118 | 0        | 0        | 0 | 0 | 0.000625 | 0        | 0 |
| 0 | 6.57E-05 | 6.57E-05 | 0        | 0 | 0 | 0        | 0        | 0 |
| 0 | 0.00023  | 0        | 0        | 0 | 0 | 0        | 0        | 0 |
| 0 | 0.003616 | 0        | 0        | 0 | 0 | 0.001545 | 0        | 0 |
| 0 | 0.001151 | 0        | 0        | 0 | 0 | 0        | 3.29E-05 | 0 |
| 0 | 0.000362 | 0        | 9.86E-05 | 0 | 0 | 6.57E-05 | 0        | 0 |
| 0 | 0.002137 | 0        | 0        | 0 | 0 | 0.000625 | 0        | 0 |
| 0 | 0.000362 | 0        | 0        | 0 | 0 | 0.00023  | 0        | 0 |
| 0 | 0.001512 | 0        | 0        | 0 | 0 | 0.000427 | 0        | 0 |
| 0 | 3.29E-05 | 0        | 0        | 0 | 0 | 0        | 0        | 0 |
| 0 | 3.29E-05 | 0        | 0        | 0 | 0 | 6.57E-05 | 0        | 0 |
| 0 | 0.000362 | 0        | 0        | 0 | 0 | 0        | 0        | 0 |
| 0 | 0        | 0        | 0        | 0 | 0 | 0.000427 | 0        | 0 |
| 0 | 0        | 0        | 0        | 0 | 0 | 0.001841 | 0        | 0 |
| 0 | 0.00023  | 0        | 0        | 0 | 0 | 0.000164 | 0        | 0 |
| 0 | 0.00023  | 0        | 0        | 0 | 0 | 0.002663 | 0        | 0 |
| 0 | 0.00092  | 0        | 0        | 0 | 0 | 0.000592 | 0        | 0 |
| 0 | 0.002893 | 0        | 0        | 0 | 0 | 0.000657 | 0        | 0 |
| 0 | 0.002433 | 0        | 0        | 0 | 0 | 0.000329 | 0        | 0 |
| 0 | 0.006542 | 0        | 0        | 0 | 0 | 0.000296 | 0        | 0 |
| 0 | 0.015352 | 0        | 0        | 0 | 0 | 0.001282 | 0        | 0 |
| 0 | 0.020119 | 0        | 0        | 0 | 0 | 0.001414 | 0        | 0 |
| 0 | 0.007693 | 0        | 0        | 0 | 0 | 0.000592 | 0        | 0 |
| 0 | 0.006608 | 0        | 0        | 0 | 0 | 0.000756 | 9.86E-05 | 0 |
| 0 | 0.002531 | 0        | 0        | 0 | 0 | 0.000559 | 0.000362 | 0 |

|   |          |          |   |   |          |          |          |   |
|---|----------|----------|---|---|----------|----------|----------|---|
| 0 | 0.002893 | 0        | 0 | 0 | 0        | 0.001216 | 0        | 0 |
| 0 | 0.001414 | 0        | 0 | 0 | 0        | 0.00069  | 0        | 0 |
| 0 | 0.002071 | 0        | 0 | 0 | 3.29E-05 | 0.000427 | 0        | 0 |
| 0 | 3.29E-05 | 0        | 0 | 0 | 0        | 0        | 0        | 0 |
| 0 | 0        | 0        | 0 | 0 | 0        | 0        | 0        | 0 |
| 0 | 0        | 0        | 0 | 0 | 0        | 0        | 0        | 0 |
| 0 | 0.000855 | 0        | 0 | 0 | 0        | 0        | 0        | 0 |
| 0 | 0        | 0        | 0 | 0 | 0        | 0        | 0        | 0 |
| 0 | 0        | 0        | 0 | 0 | 0        | 0        | 0        | 0 |
| 0 | 0.000559 | 0        | 0 | 0 | 0        | 0        | 0        | 0 |
| 0 | 0        | 0        | 0 | 0 | 0        | 0        | 0        | 0 |
| 0 | 3.29E-05 | 0        | 0 | 0 | 0        | 0        | 0        | 0 |
| 0 | 0        | 0        | 0 | 0 | 0        | 0        | 0        | 0 |
| 0 | 0        | 0        | 0 | 0 | 0        | 0        | 0        | 0 |
| 0 | 0.028995 | 0        | 0 | 0 | 0        | 0.001315 | 0        | 0 |
| 0 | 0.023209 | 0        | 0 | 0 | 0        | 0.000723 | 0        | 0 |
| 0 | 0.007232 | 0        | 0 | 0 | 0        | 0.000723 | 0        | 0 |
| 0 | 0.009073 | 0        | 0 | 0 | 0        | 0.000362 | 0        | 0 |
| 0 | 0.011506 | 0        | 0 | 0 | 0        | 0.00069  | 0        | 0 |
| 0 | 0.027812 | 0        | 0 | 0 | 0        | 0.001085 | 0        | 0 |
| 0 | 0.014892 | 0        | 0 | 0 | 0        | 0.001611 | 0        | 0 |
| 0 | 0.006016 | 0        | 0 | 0 | 0        | 0.000592 | 0        | 0 |
| 0 | 0.000723 | 0        | 0 | 0 | 0        | 0.000263 | 0        | 0 |
| 0 | 0.002959 | 0        | 0 | 0 | 0        | 0        | 0        | 0 |
| 0 | 0        | 0        | 0 | 0 | 0        | 0        | 0        | 0 |
| 0 | 0        | 0        | 0 | 0 | 0        | 0        | 0        | 0 |
| 0 | 3.29E-05 | 0        | 0 | 0 | 0        | 0        | 0        | 0 |
| 0 | 0        | 0        | 0 | 0 | 0        | 0        | 0        | 0 |
| 0 | 0.000263 | 0        | 0 | 0 | 0        | 9.86E-05 | 0        | 0 |
| 0 | 6.57E-05 | 0        | 0 | 0 | 0        | 0        | 0        | 0 |
| 0 | 0        | 0        | 0 | 0 | 0        | 0        | 0        | 0 |
| 0 | 0        | 0        | 0 | 0 | 0        | 0        | 0        | 0 |
| 0 | 0.004997 | 0        | 0 | 0 | 0        | 0.00023  | 0        | 0 |
| 0 | 0.003057 | 0        | 0 | 0 | 0        | 0.00023  | 0        | 0 |
| 0 | 0.003123 | 0        | 0 | 0 | 0        | 0.001183 | 0        | 0 |
| 0 | 0.002729 | 0        | 0 | 0 | 0        | 0.000657 | 3.29E-05 | 0 |
| 0 | 0.009139 | 0        | 0 | 0 | 0        | 0.000493 | 0        | 0 |
| 0 | 0.000625 | 0        | 0 | 0 | 0        | 9.86E-05 | 0.00023  | 0 |
| 0 | 0.004865 | 0        | 0 | 0 | 0        | 0.000296 | 0        | 0 |
| 0 | 0.002301 | 6.57E-05 | 0 | 0 | 0        | 0.000131 | 0        | 0 |
| 0 | 0.001183 | 0        | 0 | 0 | 0        | 0.001052 | 0        | 0 |
| 0 | 0.002531 | 0        | 0 | 0 | 0        | 0.00023  | 6.57E-05 | 0 |
| 0 | 0.00263  | 0        | 0 | 0 | 0        | 0        | 0.00023  | 0 |
| 0 | 0.000986 | 0        | 0 | 0 | 0        | 6.57E-05 | 0        | 0 |
| 0 | 0.000559 | 0        | 0 | 0 | 0        | 3.29E-05 | 0        | 0 |
| 0 | 0.00069  | 0        | 0 | 0 | 0        | 9.86E-05 | 0        | 0 |
| 0 | 0.000559 | 0        | 0 | 0 | 0        | 9.86E-05 | 0        | 0 |

|   |          |          |   |   |   |          |          |   |
|---|----------|----------|---|---|---|----------|----------|---|
| 0 | 0.019396 | 0        | 0 | 0 | 0 | 0.000625 | 0        | 0 |
| 0 | 0.002663 | 0        | 0 | 0 | 0 | 0.000131 | 0        | 0 |
| 0 | 0.000822 | 0        | 0 | 0 | 0 | 0.000164 | 0        | 0 |
| 0 | 0.003419 | 0        | 0 | 0 | 0 | 0        | 0        | 0 |
| 0 | 0.00835  | 0        | 0 | 0 | 0 | 0.000131 | 0        | 0 |
| 0 | 0.002433 | 0        | 0 | 0 | 0 | 0.001348 | 0        | 0 |
| 0 | 0.000164 | 0        | 0 | 0 | 0 | 0.000296 | 0        | 0 |
| 0 | 3.29E-05 | 0        | 0 | 0 | 0 | 0        | 0        | 0 |
| 0 | 0        | 0        | 0 | 0 | 0 | 0.000263 | 0        | 0 |
| 0 | 9.86E-05 | 0        | 0 | 0 | 0 | 0        | 0        | 0 |
| 0 | 0.00092  | 0        | 0 | 0 | 0 | 0.000493 | 0        | 0 |
| 0 | 0        | 0        | 0 | 0 | 0 | 0        | 0        | 0 |
| 0 | 0.00046  | 6.57E-05 | 0 | 0 | 0 | 0.000197 | 0        | 0 |
| 0 | 0        | 0        | 0 | 0 | 0 | 0.000197 | 0        | 0 |
| 0 | 0.000625 | 0        | 0 | 0 | 0 | 3.29E-05 | 0        | 0 |
| 0 | 0.003583 | 0        | 0 | 0 | 0 | 0.000329 | 0        | 0 |
| 0 | 0.000296 | 0        | 0 | 0 | 0 | 0        | 0        | 0 |
| 0 | 0.000164 | 0        | 0 | 0 | 0 | 0.000131 | 0        | 0 |
| 0 | 0.002663 | 0        | 0 | 0 | 0 | 9.86E-05 | 0        | 0 |
| 0 | 0.002268 | 0        | 0 | 0 | 0 | 0.000822 | 0        | 0 |
| 0 | 0        | 0        | 0 | 0 | 0 | 3.29E-05 | 0        | 0 |
| 0 | 0.000164 | 0        | 0 | 0 | 0 | 0.000263 | 0        | 0 |
| 0 | 0        | 0        | 0 | 0 | 0 | 0.00069  | 0        | 0 |
| 0 | 0.000362 | 0        | 0 | 0 | 0 | 9.86E-05 | 0        | 0 |
| 0 | 0        | 0        | 0 | 0 | 0 | 0        | 0        | 0 |
| 0 | 0        | 0        | 0 | 0 | 0 | 0        | 0        | 0 |
| 0 | 3.29E-05 | 0        | 0 | 0 | 0 | 0        | 0        | 0 |
| 0 | 0.00023  | 0        | 0 | 0 | 0 | 0        | 0        | 0 |
| 0 | 0.002531 | 0        | 0 | 0 | 0 | 6.57E-05 | 0        | 0 |
| 0 | 0.000164 | 0        | 0 | 0 | 0 | 9.86E-05 | 0        | 0 |
| 0 | 6.57E-05 | 0        | 0 | 0 | 0 | 0        | 0        | 0 |
| 0 | 3.29E-05 | 0        | 0 | 0 | 0 | 0        | 0        | 0 |
| 0 | 0.000197 | 0        | 0 | 0 | 0 | 0.000131 | 0        | 0 |
| 0 | 0.001118 | 0        | 0 | 0 | 0 | 0.000263 | 0        | 0 |
| 0 | 0.000164 | 0        | 0 | 0 | 0 | 0        | 0        | 0 |
| 0 | 3.29E-05 | 0        | 0 | 0 | 0 | 0        | 0        | 0 |
| 0 | 0.00766  | 0        | 0 | 0 | 0 | 0.00023  | 0        | 0 |
| 0 | 0.000888 | 0        | 0 | 0 | 0 | 0.00023  | 0        | 0 |
| 0 | 0.00641  | 0        | 0 | 0 | 0 | 0.000888 | 6.57E-05 | 0 |
| 0 | 0.000855 | 0        | 0 | 0 | 0 | 3.29E-05 | 0        | 0 |
| 0 | 0.001348 | 0        | 0 | 0 | 0 | 9.86E-05 | 0        | 0 |
| 0 | 9.86E-05 | 0        | 0 | 0 | 0 | 9.86E-05 | 0        | 0 |
| 0 | 0.001052 | 6.57E-05 | 0 | 0 | 0 | 0.000559 | 0        | 0 |
| 0 | 0.00023  | 0        | 0 | 0 | 0 | 6.57E-05 | 0.000296 | 0 |
| 0 | 0.004208 | 0        | 0 | 0 | 0 | 6.57E-05 | 0        | 0 |
| 0 | 0.007331 | 0        | 0 | 0 | 0 | 0.001479 | 6.57E-05 | 0 |
| 0 | 0.012525 | 0        | 0 | 0 | 0 | 0.000197 | 0        | 0 |



|   |          |          |   |   |   |          |          |          |
|---|----------|----------|---|---|---|----------|----------|----------|
| 0 | 9.86E-05 | 0        | 0 | 0 | 0 | 0        | 0        | 0        |
| 0 | 0.002926 | 0        | 0 | 0 | 0 | 0        | 0        | 0        |
| 0 | 0        | 0        | 0 | 0 | 0 | 0.000723 | 0        | 0        |
| 0 | 0.000493 | 0        | 0 | 0 | 0 | 0        | 0        | 0        |
| 0 | 0        | 0        | 0 | 0 | 0 | 0        | 0        | 0        |
| 0 | 0        | 0        | 0 | 0 | 0 | 0        | 0        | 0        |
| 0 | 0        | 0        | 0 | 0 | 0 | 0        | 0        | 0        |
| 0 | 0        | 0        | 0 | 0 | 0 | 0        | 0        | 0        |
| 0 | 0        | 0        | 0 | 0 | 0 | 0        | 0        | 0        |
| 0 | 0        | 0        | 0 | 0 | 0 | 0        | 0        | 0        |
| 0 | 0        | 0        | 0 | 0 | 0 | 0        | 0        | 0        |
| 0 | 0        | 0        | 0 | 0 | 0 | 0        | 0        | 0        |
| 0 | 0        | 0        | 0 | 0 | 0 | 0        | 0        | 0        |
| 0 | 0        | 0        | 0 | 0 | 0 | 3.29E-05 | 0        | 0        |
| 0 | 0        | 0        | 0 | 0 | 0 | 0        | 9.86E-05 | 0        |
| 0 | 6.57E-05 | 0        | 0 | 0 | 0 | 0        | 0        | 0        |
| 0 | 0        | 0        | 0 | 0 | 0 | 0        | 0        | 0        |
| 0 | 0        | 0        | 0 | 0 | 0 | 0        | 0        | 0        |
| 0 | 0        | 0        | 0 | 0 | 0 | 0        | 0        | 0        |
| 0 | 0        | 0        | 0 | 0 | 0 | 0        | 0        | 0        |
| 0 | 0        | 0        | 0 | 0 | 0 | 3.29E-05 | 0        | 0        |
| 0 | 0.012624 | 0        | 0 | 0 | 0 | 0.00355  | 0        | 0        |
| 0 | 0.006378 | 0        | 0 | 0 | 0 | 0.00092  | 0        | 0        |
| 0 | 0.002893 | 0        | 0 | 0 | 0 | 0.000164 | 3.29E-05 | 0        |
| 0 | 0.003781 | 0        | 0 | 0 | 0 | 0.000296 | 0        | 0        |
| 0 | 0.00092  | 0        | 0 | 0 | 0 | 0.00023  | 0        | 0        |
| 0 | 0.006673 | 0        | 0 | 0 | 0 | 0.002367 | 0        | 0        |
| 0 | 3.29E-05 | 0        | 0 | 0 | 0 | 0        | 0        | 0        |
| 0 | 0.001644 | 0        | 0 | 0 | 0 | 0.00046  | 0        | 3.29E-05 |
| 0 | 0.0048   | 0        | 0 | 0 | 0 | 0.000756 | 0        | 0        |
| 0 | 0.000559 | 0        | 0 | 0 | 0 | 3.29E-05 | 0        | 0        |
| 0 | 0.000723 | 0        | 0 | 0 | 0 | 0.000263 | 0        | 0        |
| 0 | 0.000559 | 0        | 0 | 0 | 0 | 0.00023  | 0        | 0        |
| 0 | 0.00046  | 0        | 0 | 0 | 0 | 0.000329 | 0        | 0        |
| 0 | 0.001019 | 0        | 0 | 0 | 0 | 6.57E-05 | 0        | 0        |
| 0 | 0.000131 | 0        | 0 | 0 | 0 | 0.000131 | 0        | 0        |
| 0 | 0.001545 | 0        | 0 | 0 | 0 | 0.000164 | 0        | 0        |
| 0 | 0.000723 | 0        | 0 | 0 | 0 | 0        | 0        | 0        |
| 0 | 0.001019 | 0        | 0 | 0 | 0 | 0.000197 | 0        | 0        |
| 0 | 0.001841 | 0        | 0 | 0 | 0 | 0.000394 | 0        | 0        |
| 0 | 0.001742 | 0        | 0 | 0 | 0 | 0.000131 | 0        | 0        |
| 0 | 0.000657 | 0        | 0 | 0 | 0 | 6.57E-05 | 3.29E-05 | 0        |
| 0 | 0.000329 | 0        | 0 | 0 | 0 | 3.29E-05 | 0        | 0        |
| 0 | 0.000559 | 0        | 0 | 0 | 0 | 9.86E-05 | 0        | 0        |
| 0 | 0.003846 | 0        | 0 | 0 | 0 | 0.001775 | 0        | 0        |
| 0 | 0.00069  | 0        | 0 | 0 | 0 | 6.57E-05 | 0        | 0        |
| 0 | 0.001874 | 0        | 0 | 0 | 0 | 0.000493 | 0        | 0        |
| 0 | 0.001151 | 0        | 0 | 0 | 0 | 0        | 0.002334 | 0        |
| 0 | 0.000723 | 0        | 0 | 0 | 0 | 3.29E-05 | 6.57E-05 | 0        |
| 0 | 0.000592 | 0        | 0 | 0 | 0 | 0.000493 | 6.57E-05 | 0        |
| 0 | 0.000559 | 3.29E-05 | 0 | 0 | 0 | 3.29E-05 | 0        | 0        |

|   |          |          |   |          |   |          |          |   |
|---|----------|----------|---|----------|---|----------|----------|---|
| 0 | 0.004537 | 0        | 0 | 0        | 0 | 6.57E-05 | 0.000164 | 0 |
| 0 | 0.001611 | 0        | 0 | 0        | 0 | 0.000263 | 3.29E-05 | 0 |
| 0 | 0.000723 | 0        | 0 | 0        | 0 | 3.29E-05 | 0        | 0 |
| 0 | 0.006115 | 0        | 0 | 0        | 0 | 0.00046  | 0.000164 | 0 |
| 0 | 0.001512 | 0        | 0 | 0        | 0 | 3.29E-05 | 0        | 0 |
| 0 | 0.000789 | 0        | 0 | 0        | 0 | 0.000197 | 0        | 0 |
| 0 | 0.000723 | 0        | 0 | 0        | 0 | 3.29E-05 | 0        | 0 |
| 0 | 9.86E-05 | 0        | 0 | 0        | 0 | 6.57E-05 | 0        | 0 |
| 0 | 0.000197 | 0        | 0 | 0        | 0 | 9.86E-05 | 0        | 0 |
| 0 | 9.86E-05 | 0        | 0 | 0        | 0 | 0        | 0        | 0 |
| 0 | 0.000164 | 0        | 0 | 0        | 0 | 9.86E-05 | 0        | 0 |
| 0 | 0.000625 | 0        | 0 | 0        | 0 | 0        | 0        | 0 |
| 0 | 0.002203 | 0        | 0 | 0        | 0 | 0.000756 | 0        | 0 |
| 0 | 0.007035 | 0        | 0 | 0        | 0 | 0.000723 | 6.57E-05 | 0 |
| 0 | 0.007035 | 0        | 0 | 0        | 0 | 0.00046  | 0        | 0 |
| 0 | 0.000559 | 0        | 0 | 0        | 0 | 0        | 0        | 0 |
| 0 | 0.005358 | 0        | 0 | 0        | 0 | 0.002597 | 3.29E-05 | 0 |
| 0 | 0.003682 | 0        | 0 | 0        | 0 | 0.000164 | 0        | 0 |
| 0 | 0.001709 | 0        | 0 | 0        | 0 | 6.57E-05 | 0        | 0 |
| 0 | 0.000164 | 0        | 0 | 0        | 0 | 0.000296 | 0        | 0 |
| 0 | 0.006082 | 0        | 0 | 0        | 0 | 0.00046  | 0        | 0 |
| 0 | 0.004044 | 0        | 0 | 0        | 0 | 0.000394 | 0        | 0 |
| 0 | 0.000822 | 0        | 0 | 0        | 0 | 0        | 0        | 0 |
| 0 | 0.000855 | 0        | 0 | 0        | 0 | 0.000131 | 3.29E-05 | 0 |
| 0 | 0.003189 | 0        | 0 | 0        | 0 | 0.001479 | 0        | 0 |
| 0 | 0.000789 | 0        | 0 | 0        | 0 | 0.000822 | 0        | 0 |
| 0 | 0.001545 | 0        | 0 | 0        | 0 | 0.00023  | 0        | 0 |
| 0 | 0.000756 | 0        | 0 | 0        | 0 | 6.57E-05 | 0        | 0 |
| 0 | 0.000493 | 3.29E-05 | 0 | 0        | 0 | 6.57E-05 | 0        | 0 |
| 0 | 0.000329 | 0        | 0 | 0        | 0 | 6.57E-05 | 0        | 0 |
| 0 | 0.000394 | 0        | 0 | 0        | 0 | 0.000296 | 0        | 0 |
| 0 | 0.002038 | 0        | 0 | 0        | 0 | 0.000427 | 0        | 0 |
| 0 | 0.000559 | 0        | 0 | 0        | 0 | 0.000164 | 0        | 0 |
| 0 | 0.005358 | 0        | 0 | 0        | 0 | 0.000164 | 0        | 0 |
| 0 | 0.000394 | 0        | 0 | 0        | 0 | 0        | 0        | 0 |
| 0 | 0        | 0        | 0 | 0        | 0 | 0        | 9.86E-05 | 0 |
| 0 | 3.29E-05 | 0        | 0 | 0        | 0 | 0.000526 | 0        | 0 |
| 0 | 0        | 0        | 0 | 0        | 0 | 0        | 0        | 0 |
| 0 | 0        | 0        | 0 | 0        | 0 | 0        | 0        | 0 |
| 0 | 0.000592 | 0        | 0 | 0        | 0 | 0        | 0        | 0 |
| 0 | 0.000855 | 0        | 0 | 0        | 0 | 0        | 0        | 0 |
| 0 | 0        | 0        | 0 | 0        | 0 | 0        | 0        | 0 |
| 0 | 6.57E-05 | 0        | 0 | 0        | 0 | 0        | 0        | 0 |
| 0 | 6.57E-05 | 0        | 0 | 0        | 0 | 6.57E-05 | 0        | 0 |
| 0 | 0        | 0        | 0 | 0        | 0 | 0        | 0        | 0 |
| 0 | 0.006805 | 0        | 0 | 3.29E-05 | 0 | 0.000526 | 3.29E-05 | 0 |
| 0 | 0.00023  | 0        | 0 | 0        | 0 | 9.86E-05 | 0        | 0 |



|   |          |   |   |   |   |          |          |          |
|---|----------|---|---|---|---|----------|----------|----------|
| 0 | 0.002137 | 0 | 0 | 0 | 0 | 6.57E-05 | 0        | 0        |
| 0 | 0.006378 | 0 | 0 | 0 | 0 | 0        | 0        | 0        |
| 0 | 0.002959 | 0 | 0 | 0 | 0 | 0        | 0        | 0        |
| 0 | 0.004471 | 0 | 0 | 0 | 0 | 0        | 0        | 0        |
| 0 | 0.011276 | 0 | 0 | 0 | 0 | 0.000296 | 0        | 0        |
| 0 | 0.003813 | 0 | 0 | 0 | 0 | 6.57E-05 | 0        | 0        |
| 0 | 0.001677 | 0 | 0 | 0 | 0 | 0.000493 | 0        | 0        |
| 0 | 0        | 0 | 0 | 0 | 0 | 3.29E-05 | 0        | 0        |
| 0 | 0.000493 | 0 | 0 | 0 | 0 | 0        | 0        | 6.57E-05 |
| 0 | 0.000131 | 0 | 0 | 0 | 0 | 0.001118 | 0        | 0        |
| 0 | 0.000329 | 0 | 0 | 0 | 0 | 0        | 0        | 0        |
| 0 | 0.000427 | 0 | 0 | 0 | 0 | 3.29E-05 | 0        | 0        |
| 0 | 0.000296 | 0 | 0 | 0 | 0 | 0.00194  | 0.000296 | 0        |
| 0 | 0.001085 | 0 | 0 | 0 | 0 | 3.29E-05 | 0        | 0        |
| 0 | 0.000164 | 0 | 0 | 0 | 0 | 9.86E-05 | 3.29E-05 | 0        |
| 0 | 0.00023  | 0 | 0 | 0 | 0 | 0.00023  | 0        | 0.000131 |
| 0 | 0        | 0 | 0 | 0 | 0 | 0        | 0        | 0        |
| 0 | 0        | 0 | 0 | 0 | 0 | 0        | 0        | 0        |
| 0 | 0        | 0 | 0 | 0 | 0 | 0        | 0        | 0        |
| 0 | 0        | 0 | 0 | 0 | 0 | 0        | 0        | 0        |
| 0 | 9.86E-05 | 0 | 0 | 0 | 0 | 0        | 0        | 0        |
| 0 | 0        | 0 | 0 | 0 | 0 | 0        | 0        | 0        |
| 0 | 0        | 0 | 0 | 0 | 0 | 0        | 0        | 0        |
| 0 | 0        | 0 | 0 | 0 | 0 | 0        | 0        | 0        |
| 0 | 0.001578 | 0 | 0 | 0 | 0 | 0.000197 | 0        | 0        |
| 0 | 0.001775 | 0 | 0 | 0 | 0 | 0.000197 | 0        | 0        |
| 0 | 0.00023  | 0 | 0 | 0 | 0 | 0        | 0        | 0        |
| 0 | 0.004438 | 0 | 0 | 0 | 0 | 0.000493 | 0        | 0        |
| 0 | 0.00641  | 0 | 0 | 0 | 0 | 0.001019 | 0        | 0        |
| 0 | 0.016306 | 0 | 0 | 0 | 0 | 0.000822 | 0        | 0        |
| 0 | 0.00904  | 0 | 0 | 0 | 0 | 0.000953 | 0        | 0        |
| 0 | 0.005293 | 0 | 0 | 0 | 0 | 0.00069  | 0        | 0        |
| 0 | 0.004274 | 0 | 0 | 0 | 0 | 0.000427 | 0        | 0        |
| 0 | 0.050035 | 0 | 0 | 0 | 0 | 0.003879 | 0        | 0        |
| 0 | 0.00194  | 0 | 0 | 0 | 0 | 0.001874 | 0        | 0        |
| 0 | 0.000263 | 0 | 0 | 0 | 0 | 9.86E-05 | 0        | 0        |
| 0 | 0.001151 | 0 | 0 | 0 | 0 | 3.29E-05 | 0        | 0        |
| 0 | 0.000723 | 0 | 0 | 0 | 0 | 0        | 0        | 0        |
| 0 | 0.004668 | 0 | 0 | 0 | 0 | 0        | 0        | 0        |
| 0 | 0.024458 | 0 | 0 | 0 | 0 | 0.000427 | 0        | 0        |
| 0 | 0.040238 | 0 | 0 | 0 | 0 | 6.57E-05 | 0        | 0        |
| 0 | 0.002959 | 0 | 0 | 0 | 0 | 0.00069  | 0        | 0        |
| 0 | 0.002268 | 0 | 0 | 0 | 0 | 0        | 0        | 0        |
| 0 | 0.002137 | 0 | 0 | 0 | 0 | 0.000164 | 0        | 0        |
| 0 | 0.000986 | 0 | 0 | 0 | 0 | 0.000197 | 0        | 0        |
| 0 | 0.00194  | 0 | 0 | 0 | 0 | 0.000493 | 0        | 0        |
| 0 | 9.86E-05 | 0 | 0 | 0 | 0 | 0.000329 | 0        | 0        |

|          |          |   |   |          |   |          |   |   |
|----------|----------|---|---|----------|---|----------|---|---|
| 0        | 0.000394 | 0 | 0 | 0        | 0 | 9.86E-05 | 0 | 0 |
| 0        | 0.004865 | 0 | 0 | 0        | 0 | 0.000559 | 0 | 0 |
| 0        | 0.002663 | 0 | 0 | 0        | 0 | 0.000592 | 0 | 0 |
| 0        | 0.00194  | 0 | 0 | 0        | 0 | 0.000427 | 0 | 0 |
| 0        | 0.006147 | 0 | 0 | 0        | 0 | 0.000657 | 0 | 0 |
| 0        | 0.004734 | 0 | 0 | 0        | 0 | 0.000822 | 0 | 0 |
| 0        | 0.003024 | 0 | 0 | 0        | 0 | 0.000625 | 0 | 0 |
| 0        | 0.000329 | 0 | 0 | 0        | 0 | 0        | 0 | 0 |
| 0        | 0.00046  | 0 | 0 | 0        | 0 | 0        | 0 | 0 |
| 0        | 0.001315 | 0 | 0 | 0        | 0 | 3.29E-05 | 0 | 0 |
| 0        | 0.001216 | 0 | 0 | 0        | 0 | 0        | 0 | 0 |
| 0        | 0        | 0 | 0 | 0        | 0 | 0        | 0 | 0 |
| 0        | 0.000592 | 0 | 0 | 0        | 0 | 6.57E-05 | 0 | 0 |
| 0        | 0.000526 | 0 | 0 | 0        | 0 | 3.29E-05 | 0 | 0 |
| 0        | 0        | 0 | 0 | 0        | 0 | 0        | 0 | 0 |
| 0        | 0.000164 | 0 | 0 | 0        | 0 | 6.57E-05 | 0 | 0 |
| 0        | 0.000164 | 0 | 0 | 0        | 0 | 3.29E-05 | 0 | 0 |
| 0        | 0.000164 | 0 | 0 | 0        | 0 | 9.86E-05 | 0 | 0 |
| 0        | 0.000197 | 0 | 0 | 0        | 0 | 6.57E-05 | 0 | 0 |
| 0        | 0.000986 | 0 | 0 | 0        | 0 | 0.00023  | 0 | 0 |
| 0        | 0        | 0 | 0 | 0        | 0 | 0        | 0 | 0 |
| 0        | 0.000493 | 0 | 0 | 0        | 0 | 0.000131 | 0 | 0 |
| 0        | 0.000263 | 0 | 0 | 0        | 0 | 0        | 0 | 0 |
| 0        | 0        | 0 | 0 | 0        | 0 | 3.29E-05 | 0 | 0 |
| 0        | 0.000427 | 0 | 0 | 0        | 0 | 0.000263 | 0 | 0 |
| 0        | 0        | 0 | 0 | 0        | 0 | 3.29E-05 | 0 | 0 |
| 0        | 3.29E-05 | 0 | 0 | 0        | 0 | 0        | 0 | 0 |
| 0        | 0        | 0 | 0 | 0        | 0 | 0        | 0 | 0 |
| 0        | 0        | 0 | 0 | 0        | 0 | 0        | 0 | 0 |
| 0        | 0        | 0 | 0 | 0        | 0 | 0        | 0 | 0 |
| 0        | 0        | 0 | 0 | 0        | 0 | 0        | 0 | 0 |
| 0        | 0        | 0 | 0 | 0        | 0 | 0        | 0 | 0 |
| 0        | 0        | 0 | 0 | 0        | 0 | 0        | 0 | 0 |
| 3.29E-05 | 0        | 0 | 0 | 0        | 0 | 0        | 0 | 0 |
| 0        | 0        | 0 | 0 | 0        | 0 | 0        | 0 | 0 |
| 0        | 0.001972 | 0 | 0 | 0        | 0 | 0.000493 | 0 | 0 |
| 0        | 9.86E-05 | 0 | 0 | 0        | 0 | 3.29E-05 | 0 | 0 |
| 0        | 0.008416 | 0 | 0 | 0        | 0 | 6.57E-05 | 0 | 0 |
| 0        | 0.001775 | 0 | 0 | 0        | 0 | 0.000329 | 0 | 0 |
| 0        | 0.002038 | 0 | 0 | 0        | 0 | 0.000197 | 0 | 0 |
| 0        | 0.001972 | 0 | 0 | 0        | 0 | 0.00092  | 0 | 0 |
| 0        | 0.00023  | 0 | 0 | 0        | 0 | 9.86E-05 | 0 | 0 |
| 0        | 0.001808 | 0 | 0 | 0        | 0 | 0.001052 | 0 | 0 |
| 0        | 0.004504 | 0 | 0 | 0        | 0 | 0.000263 | 0 | 0 |
| 0        | 0.017752 | 0 | 0 | 0.000164 | 0 | 0.000822 | 0 | 0 |
| 0        | 0.000657 | 0 | 0 | 0        | 0 | 0        | 0 | 0 |
| 0        | 6.57E-05 | 0 | 0 | 0        | 0 | 0.000329 | 0 | 0 |

|   |          |          |   |   |   |          |          |   |
|---|----------|----------|---|---|---|----------|----------|---|
| 0 | 0.001446 | 0.000394 | 0 | 0 | 0 | 0.000427 | 6.57E-05 | 0 |
| 0 | 0.002334 | 0        | 0 | 0 | 0 | 0.000625 | 0        | 0 |
| 0 | 0.001183 | 0        | 0 | 0 | 0 | 0.000756 | 0        | 0 |
| 0 | 0.001644 | 0        | 0 | 0 | 0 | 0.000855 | 0        | 0 |
| 0 | 0.003189 | 0        | 0 | 0 | 0 | 0.000164 | 0        | 0 |
| 0 | 0.000756 | 3.29E-05 | 0 | 0 | 0 | 0        | 6.57E-05 | 0 |
| 0 | 0.000131 | 0        | 0 | 0 | 0 | 0        | 0        | 0 |
| 0 | 0.001709 | 0        | 0 | 0 | 0 | 0.000427 | 0        | 0 |
| 0 | 0.000427 | 0        | 0 | 0 | 0 | 0        | 0        | 0 |
| 0 | 0.000296 | 0        | 0 | 0 | 0 | 6.57E-05 | 9.86E-05 | 0 |
| 0 | 0.007956 | 0        | 0 | 0 | 0 | 0.000559 | 0        | 0 |
| 0 | 0.000394 | 0        | 0 | 0 | 0 | 0.000625 | 0        | 0 |
| 0 | 0.00069  | 0        | 0 | 0 | 0 | 0        | 0        | 0 |
| 0 | 0.000197 | 0        | 0 | 0 | 0 | 0        | 0        | 0 |
| 0 | 0        | 0        | 0 | 0 | 0 | 3.29E-05 | 0        | 0 |
| 0 | 6.57E-05 | 0        | 0 | 0 | 0 | 0.000197 | 0        | 0 |
| 0 | 6.57E-05 | 0        | 0 | 0 | 0 | 3.29E-05 | 0        | 0 |
| 0 | 0.008975 | 0        | 0 | 0 | 0 | 0.001972 | 0        | 0 |
| 0 | 0.000164 | 0        | 0 | 0 | 0 | 6.57E-05 | 0        | 0 |
| 0 | 0.000197 | 0        | 0 | 0 | 0 | 6.57E-05 | 0        | 0 |
| 0 | 0.002794 | 0        | 0 | 0 | 0 | 9.86E-05 | 0        | 0 |
| 0 | 0.004438 | 0        | 0 | 0 | 0 | 0.001677 | 0        | 0 |
| 0 | 0.00069  | 0        | 0 | 0 | 0 | 6.57E-05 | 0        | 0 |



























































| k_Bacteri |
|-----------|-----------|-----------|-----------|-----------|-----------|-----------|-----------|-----------|
| 0         | 0         | 0         | 0         | 0         | 0         | 0         | 0         | 0         |
| 0         | 0         | 0         | 0         | 0         | 0         | 0         | 0         | 0         |
| 0         | 0         | 0         | 0         | 0         | 0         | 0         | 0         | 0         |
| 0         | 0         | 0         | 0         | 0         | 0         | 0         | 0         | 0         |
| 0         | 0         | 0         | 0         | 0         | 0         | 0         | 0         | 0         |
| 0         | 0         | 0         | 0         | 0         | 0         | 0         | 0         | 0         |
| 0         | 0         | 0         | 0         | 0         | 0         | 0         | 0         | 0         |
| 0         | 0         | 0         | 0         | 0         | 0         | 0         | 0         | 0         |
| 0         | 0         | 0         | 0         | 0         | 0         | 0         | 0         | 0         |
| 0         | 0         | 0         | 0         | 0         | 0         | 0         | 0         | 0         |
| 0         | 0         | 0         | 0         | 0         | 0         | 0         | 0         | 0         |
| 0         | 0         | 0         | 0         | 0         | 0         | 0         | 0         | 0         |
| 0         | 0         | 0         | 0         | 0         | 0         | 0         | 0         | 0         |
| 0         | 0         | 0         | 0         | 0         | 3.29E-05  | 0         | 0         | 0         |
| 0         | 0         | 0         | 0         | 0         | 6.57E-05  | 0         | 0         | 0         |
| 0         | 0         | 0         | 0         | 0         | 0         | 0         | 0         | 0         |
| 0         | 0         | 0         | 0         | 0         | 0.004274  | 0         | 0         | 0         |
| 0         | 0         | 0         | 0         | 0         | 0.000953  | 0         | 0         | 0         |
| 0         | 0         | 0         | 0         | 0         | 0         | 0         | 0         | 0         |
| 0         | 0         | 0         | 0         | 0         | 0         | 0         | 0         | 0         |
| 0         | 0         | 0         | 0         | 0         | 3.29E-05  | 0         | 0         | 0         |
| 0         | 0         | 0         | 0         | 0         | 0         | 0         | 0         | 0         |
| 0         | 0         | 0         | 0         | 0         | 0         | 0         | 0         | 0         |
| 0         | 0         | 0         | 0         | 0         | 0.000131  | 0         | 0         | 0         |
| 0         | 0         | 0         | 0         | 0         | 0         | 0         | 0         | 0         |
| 0         | 0         | 0         | 0         | 0         | 0         | 0         | 0         | 0         |
| 0         | 0         | 0         | 0         | 0         | 0         | 0         | 0         | 0         |
| 0         | 0         | 0         | 0         | 0         | 0         | 0         | 0         | 0         |
| 0         | 0         | 0         | 0         | 0         | 6.57E-05  | 0         | 0         | 0         |
| 0         | 0         | 0         | 0         | 0         | 0         | 0         | 0         | 0         |
| 0         | 0         | 0         | 0         | 0         | 0.000263  | 0         | 0         | 0         |
| 0         | 0         | 0         | 0         | 0         | 0         | 0         | 0         | 0         |
| 0         | 0         | 0         | 0         | 0         | 0         | 0         | 0         | 0         |
| 0         | 0         | 0         | 0         | 0         | 0         | 0         | 0         | 0         |
| 0         | 0         | 0         | 0         | 0         | 0         | 0         | 0         | 0         |
| 0         | 0         | 0         | 0         | 0         | 0         | 0         | 0         | 0         |
| 0         | 0         | 0         | 0         | 0         | 3.29E-05  | 0         | 0         | 0         |
| 0         | 0         | 0         | 0         | 0         | 0         | 0         | 0         | 0         |
| 0         | 0         | 0         | 0         | 0         | 0         | 0         | 0         | 0         |
| 0         | 0         | 0         | 0         | 0         | 3.29E-05  | 0         | 0         | 0         |
| 0         | 0         | 0         | 0         | 0         | 0.000789  | 0         | 0         | 0         |
| 0         | 0         | 0         | 0         | 0         | 6.57E-05  | 0         | 0         | 0         |
| 0         | 0         | 0         | 0         | 0         | 0         | 0         | 0         | 0         |
| 0         | 0         | 0         | 0         | 0         | 0.001118  | 0         | 0         | 0         |
| 0         | 0         | 0         | 0         | 0         | 3.29E-05  | 0         | 0         | 0         |









|   |   |   |   |   |          |   |   |   |
|---|---|---|---|---|----------|---|---|---|
| 0 | 0 | 0 | 0 | 0 | 0        | 0 | 0 | 0 |
| 0 | 0 | 0 | 0 | 0 | 0        | 0 | 0 | 0 |
| 0 | 0 | 0 | 0 | 0 | 0        | 0 | 0 | 0 |
| 0 | 0 | 0 | 0 | 0 | 0        | 0 | 0 | 0 |
| 0 | 0 | 0 | 0 | 0 | 0        | 0 | 0 | 0 |
| 0 | 0 | 0 | 0 | 0 | 0.000131 | 0 | 0 | 0 |
| 0 | 0 | 0 | 0 | 0 | 0        | 0 | 0 | 0 |
| 0 | 0 | 0 | 0 | 0 | 0        | 0 | 0 | 0 |
| 0 | 0 | 0 | 0 | 0 | 0        | 0 | 0 | 0 |
| 0 | 0 | 0 | 0 | 0 | 0        | 0 | 0 | 0 |
| 0 | 0 | 0 | 0 | 0 | 0        | 0 | 0 | 0 |
| 0 | 0 | 0 | 0 | 0 | 9.86E-05 | 0 | 0 | 0 |
| 0 | 0 | 0 | 0 | 0 | 0        | 0 | 0 | 0 |
| 0 | 0 | 0 | 0 | 0 | 0        | 0 | 0 | 0 |
| 0 | 0 | 0 | 0 | 0 | 0        | 0 | 0 | 0 |
| 0 | 0 | 0 | 0 | 0 | 0        | 0 | 0 | 0 |
| 0 | 0 | 0 | 0 | 0 | 0        | 0 | 0 | 0 |
| 0 | 0 | 0 | 0 | 0 | 0        | 0 | 0 | 0 |
| 0 | 0 | 0 | 0 | 0 | 0        | 0 | 0 | 0 |
| 0 | 0 | 0 | 0 | 0 | 0        | 0 | 0 | 0 |
| 0 | 0 | 0 | 0 | 0 | 0        | 0 | 0 | 0 |
| 0 | 0 | 0 | 0 | 0 | 0        | 0 | 0 | 0 |
| 0 | 0 | 0 | 0 | 0 | 0        | 0 | 0 | 0 |
| 0 | 0 | 0 | 0 | 0 | 0.00023  | 0 | 0 | 0 |
| 0 | 0 | 0 | 0 | 0 | 0        | 0 | 0 | 0 |
| 0 | 0 | 0 | 0 | 0 | 9.86E-05 | 0 | 0 | 0 |
| 0 | 0 | 0 | 0 | 0 | 0        | 0 | 0 | 0 |
| 0 | 0 | 0 | 0 | 0 | 3.29E-05 | 0 | 0 | 0 |
| 0 | 0 | 0 | 0 | 0 | 6.57E-05 | 0 | 0 | 0 |
| 0 | 0 | 0 | 0 | 0 | 0        | 0 | 0 | 0 |
| 0 | 0 | 0 | 0 | 0 | 0        | 0 | 0 | 0 |
| 0 | 0 | 0 | 0 | 0 | 0        | 0 | 0 | 0 |
| 0 | 0 | 0 | 0 | 0 | 0        | 0 | 0 | 0 |
| 0 | 0 | 0 | 0 | 0 | 0        | 0 | 0 | 0 |
| 0 | 0 | 0 | 0 | 0 | 0.000756 | 0 | 0 | 0 |
| 0 | 0 | 0 | 0 | 0 | 0        | 0 | 0 | 0 |
| 0 | 0 | 0 | 0 | 0 | 0        | 0 | 0 | 0 |
| 0 | 0 | 0 | 0 | 0 | 0        | 0 | 0 | 0 |
| 0 | 0 | 0 | 0 | 0 | 0        | 0 | 0 | 0 |
| 0 | 0 | 0 | 0 | 0 | 0        | 0 | 0 | 0 |
| 0 | 0 | 0 | 0 | 0 | 0        | 0 | 0 | 0 |
| 0 | 0 | 0 | 0 | 0 | 0        | 0 | 0 | 0 |
| 0 | 0 | 0 | 0 | 0 | 0        | 0 | 0 | 0 |
| 0 | 0 | 0 | 0 | 0 | 3.29E-05 | 0 | 0 | 0 |
| 0 | 0 | 0 | 0 | 0 | 0        | 0 | 0 | 0 |
| 0 | 0 | 0 | 0 | 0 | 3.29E-05 | 0 | 0 | 0 |
| 0 | 0 | 0 | 0 | 0 | 0        | 0 | 0 | 0 |
| 0 | 0 | 0 | 0 | 0 | 6.57E-05 | 0 | 0 | 0 |
| 0 | 0 | 0 | 0 | 0 | 0.00023  | 0 | 0 | 0 |
| 0 | 0 | 0 | 0 | 0 | 0        | 0 | 0 | 0 |
| 0 | 0 | 0 | 0 | 0 | 0        | 0 | 0 | 0 |
| 0 | 0 | 0 | 0 | 0 | 0.000197 | 0 | 0 | 0 |



















































|   |   |          |          |   |   |   |   |          |
|---|---|----------|----------|---|---|---|---|----------|
| 0 | 0 | 0.000263 | 0        | 0 | 0 | 0 | 0 | 0        |
| 0 | 0 | 0.002104 | 0        | 0 | 0 | 0 | 0 | 0        |
| 0 | 0 | 3.29E-05 | 0        | 0 | 0 | 0 | 0 | 0        |
| 0 | 0 | 0.000362 | 0        | 0 | 0 | 0 | 0 | 0        |
| 0 | 0 | 0.000164 | 0        | 0 | 0 | 0 | 0 | 0        |
| 0 | 0 | 0        | 0        | 0 | 0 | 0 | 0 | 0        |
| 0 | 0 | 0        | 0        | 0 | 0 | 0 | 0 | 3.29E-05 |
| 0 | 0 | 9.86E-05 | 0        | 0 | 0 | 0 | 0 | 0        |
| 0 | 0 | 0.00023  | 0        | 0 | 0 | 0 | 0 | 0        |
| 0 | 0 | 0        | 0        | 0 | 0 | 0 | 0 | 0        |
| 0 | 0 | 0        | 0        | 0 | 0 | 0 | 0 | 0        |
| 0 | 0 | 0        | 0        | 0 | 0 | 0 | 0 | 0        |
| 0 | 0 | 0        | 0        | 0 | 0 | 0 | 0 | 0        |
| 0 | 0 | 0        | 3.29E-05 | 0 | 0 | 0 | 0 | 0        |
| 0 | 0 | 0.000756 | 0        | 0 | 0 | 0 | 0 | 0        |
| 0 | 0 | 0        | 0        | 0 | 0 | 0 | 0 | 0        |
| 0 | 0 | 0        | 0        | 0 | 0 | 0 | 0 | 0        |
| 0 | 0 | 0.00309  | 0        | 0 | 0 | 0 | 0 | 0        |
| 0 | 0 | 0.001808 | 0        | 0 | 0 | 0 | 0 | 0        |
| 0 | 0 | 0        | 0        | 0 | 0 | 0 | 0 | 0        |
| 0 | 0 | 0        | 0        | 0 | 0 | 0 | 0 | 0        |
| 0 | 0 | 0.000329 | 0        | 0 | 0 | 0 | 0 | 0        |
| 0 | 0 | 9.86E-05 | 0        | 0 | 0 | 0 | 0 | 0        |
| 0 | 0 | 3.29E-05 | 0        | 0 | 0 | 0 | 0 | 0        |
| 0 | 0 | 0.00023  | 0        | 0 | 0 | 0 | 0 | 0        |
| 0 | 0 | 6.57E-05 | 0        | 0 | 0 | 0 | 0 | 0        |
| 0 | 0 | 3.29E-05 | 0        | 0 | 0 | 0 | 0 | 0        |
| 0 | 0 | 0        | 0        | 0 | 0 | 0 | 0 | 0        |
| 0 | 0 | 0.000263 | 0        | 0 | 0 | 0 | 0 | 0        |
| 0 | 0 | 0        | 0        | 0 | 0 | 0 | 0 | 0        |
| 0 | 0 | 0        | 0        | 0 | 0 | 0 | 0 | 0        |
| 0 | 0 | 0.000822 | 0        | 0 | 0 | 0 | 0 | 0        |
| 0 | 0 | 0.000296 | 0        | 0 | 0 | 0 | 0 | 0        |
| 0 | 0 | 0.000329 | 0        | 0 | 0 | 0 | 0 | 0        |
| 0 | 0 | 0        | 0        | 0 | 0 | 0 | 0 | 0        |
| 0 | 0 | 3.29E-05 | 0        | 0 | 0 | 0 | 0 | 0        |
| 0 | 0 | 0.000296 | 0        | 0 | 0 | 0 | 0 | 0        |
| 0 | 0 | 0        | 0        | 0 | 0 | 0 | 0 | 0        |
| 0 | 0 | 0.000427 | 0        | 0 | 0 | 0 | 0 | 0        |
| 0 | 0 | 3.29E-05 | 0        | 0 | 0 | 0 | 0 | 0        |
| 0 | 0 | 0.000197 | 0        | 0 | 0 | 0 | 0 | 0        |
| 0 | 0 | 0.000723 | 0        | 0 | 0 | 0 | 0 | 0        |
| 0 | 0 | 0        | 0        | 0 | 0 | 0 | 0 | 0        |
| 0 | 0 | 0        | 0        | 0 | 0 | 0 | 0 | 0        |
| 0 | 0 | 3.29E-05 | 0        | 0 | 0 | 0 | 0 | 0        |
| 0 | 0 | 0.002235 | 0        | 0 | 0 | 0 | 0 | 0        |
| 0 | 0 | 0.00092  | 0        | 0 | 0 | 0 | 0 | 0        |

|   |   |          |   |   |   |   |   |   |
|---|---|----------|---|---|---|---|---|---|
| 0 | 0 | 0.000263 | 0 | 0 | 0 | 0 | 0 | 0 |
| 0 | 0 | 0.000657 | 0 | 0 | 0 | 0 | 0 | 0 |
| 0 | 0 | 0.000164 | 0 | 0 | 0 | 0 | 0 | 0 |
| 0 | 0 | 0        | 0 | 0 | 0 | 0 | 0 | 0 |
| 0 | 0 | 9.86E-05 | 0 | 0 | 0 | 0 | 0 | 0 |
| 0 | 0 | 0        | 0 | 0 | 0 | 0 | 0 | 0 |
| 0 | 0 | 0        | 0 | 0 | 0 | 0 | 0 | 0 |
| 0 | 0 | 0.001085 | 0 | 0 | 0 | 0 | 0 | 0 |
| 0 | 0 | 0.000263 | 0 | 0 | 0 | 0 | 0 | 0 |
| 0 | 0 | 0.000263 | 0 | 0 | 0 | 0 | 0 | 0 |
| 0 | 0 | 0        | 0 | 0 | 0 | 0 | 0 | 0 |
| 0 | 0 | 0        | 0 | 0 | 0 | 0 | 0 | 0 |
| 0 | 0 | 0.000421 | 0 | 0 | 0 | 0 | 0 | 0 |
| 0 | 0 | 3.29E-05 | 0 | 0 | 0 | 0 | 0 | 0 |
| 0 | 0 | 0.000625 | 0 | 0 | 0 | 0 | 0 | 0 |
| 0 | 0 | 0        | 0 | 0 | 0 | 0 | 0 | 0 |
| 0 | 0 | 3.29E-05 | 0 | 0 | 0 | 0 | 0 | 0 |
| 0 | 0 | 6.57E-05 | 0 | 0 | 0 | 0 | 0 | 0 |
| 0 | 0 | 0        | 0 | 0 | 0 | 0 | 0 | 0 |
| 0 | 0 | 0        | 0 | 0 | 0 | 0 | 0 | 0 |
| 0 | 0 | 6.57E-05 | 0 | 0 | 0 | 0 | 0 | 0 |
| 0 | 0 | 6.57E-05 | 0 | 0 | 0 | 0 | 0 | 0 |
| 0 | 0 | 9.86E-05 | 0 | 0 | 0 | 0 | 0 | 0 |
| 0 | 0 | 6.57E-05 | 0 | 0 | 0 | 0 | 0 | 0 |
| 0 | 0 | 0        | 0 | 0 | 0 | 0 | 0 | 0 |
| 0 | 0 | 0.000888 | 0 | 0 | 0 | 0 | 0 | 0 |
| 0 | 0 | 3.29E-05 | 0 | 0 | 0 | 0 | 0 | 0 |
| 0 | 0 | 0.000131 | 0 | 0 | 0 | 0 | 0 | 0 |
| 0 | 0 | 0        | 0 | 0 | 0 | 0 | 0 | 0 |
| 0 | 0 | 0.000657 | 0 | 0 | 0 | 0 | 0 | 0 |
| 0 | 0 | 0        | 0 | 0 | 0 | 0 | 0 | 0 |
| 0 | 0 | 0.000197 | 0 | 0 | 0 | 0 | 0 | 0 |
| 0 | 0 | 0.001282 | 0 | 0 | 0 | 0 | 0 | 0 |
| 0 | 0 | 0.001414 | 0 | 0 | 0 | 0 | 0 | 0 |
| 0 | 0 | 0.000164 | 0 | 0 | 0 | 0 | 0 | 0 |
| 0 | 0 | 0.001611 | 0 | 0 | 0 | 0 | 0 | 0 |
| 0 | 0 | 0.000263 | 0 | 0 | 0 | 0 | 0 | 0 |
| 0 | 0 | 0        | 0 | 0 | 0 | 0 | 0 | 0 |
| 0 | 0 | 6.57E-05 | 0 | 0 | 0 | 0 | 0 | 0 |
| 0 | 0 | 0.000296 | 0 | 0 | 0 | 0 | 0 | 0 |
| 0 | 0 | 0        | 0 | 0 | 0 | 0 | 0 | 0 |
| 0 | 0 | 3.29E-05 | 0 | 0 | 0 | 0 | 0 | 0 |
| 0 | 0 | 0        | 0 | 0 | 0 | 0 | 0 | 0 |
| 0 | 0 | 0.000131 | 0 | 0 | 0 | 0 | 0 | 0 |
| 0 | 0 | 3.29E-05 | 0 | 0 | 0 | 0 | 0 | 0 |
| 0 | 0 | 6.57E-05 | 0 | 0 | 0 | 0 | 0 | 0 |
| 0 | 0 | 3.29E-05 | 0 | 0 | 0 | 0 | 0 | 0 |



|   |   |          |   |   |   |   |   |   |   |
|---|---|----------|---|---|---|---|---|---|---|
| 0 | 0 | 0        | 0 | 0 | 0 | 0 | 0 | 0 | 0 |
| 0 | 0 | 0        | 0 | 0 | 0 | 0 | 0 | 0 | 0 |
| 0 | 0 | 0        | 0 | 0 | 0 | 0 | 0 | 0 | 0 |
| 0 | 0 | 0        | 0 | 0 | 0 | 0 | 0 | 0 | 0 |
| 0 | 0 | 0        | 0 | 0 | 0 | 0 | 0 | 0 | 0 |
| 0 | 0 | 0.000394 | 0 | 0 | 0 | 0 | 0 | 0 | 0 |
| 0 | 0 | 0.000131 | 0 | 0 | 0 | 0 | 0 | 0 | 0 |
| 0 | 0 | 0        | 0 | 0 | 0 | 0 | 0 | 0 | 0 |
| 0 | 0 | 0.000131 | 0 | 0 | 0 | 0 | 0 | 0 | 0 |
| 0 | 0 | 0.000263 | 0 | 0 | 0 | 0 | 0 | 0 | 0 |
| 0 | 0 | 0        | 0 | 0 | 0 | 0 | 0 | 0 | 0 |
| 0 | 0 | 0.000394 | 0 | 0 | 0 | 0 | 0 | 0 | 0 |
| 0 | 0 | 0        | 0 | 0 | 0 | 0 | 0 | 0 | 0 |
| 0 | 0 | 0.000493 | 0 | 0 | 0 | 0 | 0 | 0 | 0 |
| 0 | 0 | 0.00069  | 0 | 0 | 0 | 0 | 0 | 0 | 0 |
| 0 | 0 | 0.000164 | 0 | 0 | 0 | 0 | 0 | 0 | 0 |
| 0 | 0 | 0.000526 | 0 | 0 | 0 | 0 | 0 | 0 | 0 |
| 0 | 0 | 0.00023  | 0 | 0 | 0 | 0 | 0 | 0 | 0 |
| 0 | 0 | 6.57E-05 | 0 | 0 | 0 | 0 | 0 | 0 | 0 |
| 0 | 0 | 0        | 0 | 0 | 0 | 0 | 0 | 0 | 0 |
| 0 | 0 | 0        | 0 | 0 | 0 | 0 | 0 | 0 | 0 |
| 0 | 0 | 6.57E-05 | 0 | 0 | 0 | 0 | 0 | 0 | 0 |
| 0 | 0 | 0        | 0 | 0 | 0 | 0 | 0 | 0 | 0 |
| 0 | 0 | 0        | 0 | 0 | 0 | 0 | 0 | 0 | 0 |
| 0 | 0 | 0.000723 | 0 | 0 | 0 | 0 | 0 | 0 | 0 |
| 0 | 0 | 0.000427 | 0 | 0 | 0 | 0 | 0 | 0 | 0 |
| 0 | 0 | 3.29E-05 | 0 | 0 | 0 | 0 | 0 | 0 | 0 |
| 0 | 0 | 0        | 0 | 0 | 0 | 0 | 0 | 0 | 0 |
| 0 | 0 | 0.000493 | 0 | 0 | 0 | 0 | 0 | 0 | 0 |
| 0 | 0 | 0.004997 | 0 | 0 | 0 | 0 | 0 | 0 | 0 |
| 0 | 0 | 0.00023  | 0 | 0 | 0 | 0 | 0 | 0 | 0 |
| 0 | 0 | 0        | 0 | 0 | 0 | 0 | 0 | 0 | 0 |
| 0 | 0 | 0        | 0 | 0 | 0 | 0 | 0 | 0 | 0 |
| 0 | 0 | 0        | 0 | 0 | 0 | 0 | 0 | 0 | 0 |
| 0 | 0 | 0.000263 | 0 | 0 | 0 | 0 | 0 | 0 | 0 |
| 0 | 0 | 0.000164 | 0 | 0 | 0 | 0 | 0 | 0 | 0 |
| 0 | 0 | 0        | 0 | 0 | 0 | 0 | 0 | 0 | 0 |
| 0 | 0 | 9.86E-05 | 0 | 0 | 0 | 0 | 0 | 0 | 0 |
| 0 | 0 | 0.000131 | 0 | 0 | 0 | 0 | 0 | 0 | 0 |
| 0 | 0 | 0        | 0 | 0 | 0 | 0 | 0 | 0 | 0 |
| 0 | 0 | 3.29E-05 | 0 | 0 | 0 | 0 | 0 | 0 | 0 |
| 0 | 0 | 9.86E-05 | 0 | 0 | 0 | 0 | 0 | 0 | 0 |
| 0 | 0 | 0        | 0 | 0 | 0 | 0 | 0 | 0 | 0 |
| 0 | 0 | 0.000362 | 0 | 0 | 0 | 0 | 0 | 0 | 0 |
| 0 | 0 | 0.00023  | 0 | 0 | 0 | 0 | 0 | 0 | 0 |
| 0 | 0 | 0        | 0 | 0 | 0 | 0 | 0 | 0 | 0 |
| 0 | 0 | 0.000197 | 0 | 0 | 0 | 0 | 0 | 0 | 0 |











|   |   |          |          |   |   |   |   |   |
|---|---|----------|----------|---|---|---|---|---|
| 0 | 0 | 0        | 0        | 0 | 0 | 0 | 0 | 0 |
| 0 | 0 | 0        | 0        | 0 | 0 | 0 | 0 | 0 |
| 0 | 0 | 3.29E-05 | 0        | 0 | 0 | 0 | 0 | 0 |
| 0 | 0 | 0        | 0        | 0 | 0 | 0 | 0 | 0 |
| 0 | 0 | 0        | 0        | 0 | 0 | 0 | 0 | 0 |
| 0 | 0 | 6.57E-05 | 0        | 0 | 0 | 0 | 0 | 0 |
| 0 | 0 | 0.000756 | 0        | 0 | 0 | 0 | 0 | 0 |
| 0 | 0 | 6.57E-05 | 0        | 0 | 0 | 0 | 0 | 0 |
| 0 | 0 | 0.00069  | 0        | 0 | 0 | 0 | 0 | 0 |
| 0 | 0 | 0        | 0        | 0 | 0 | 0 | 0 | 0 |
| 0 | 0 | 6.57E-05 | 0        | 0 | 0 | 0 | 0 | 0 |
| 0 | 0 | 3.29E-05 | 0        | 0 | 0 | 0 | 0 | 0 |
| 0 | 0 | 0        | 0        | 0 | 0 | 0 | 0 | 0 |
| 0 | 0 | 0.000131 | 0        | 0 | 0 | 0 | 0 | 0 |
| 0 | 0 | 0.001118 | 0        | 0 | 0 | 0 | 0 | 0 |
| 0 | 0 | 0.000131 | 0        | 0 | 0 | 0 | 0 | 0 |
| 0 | 0 | 0.00023  | 0        | 0 | 0 | 0 | 0 | 0 |
| 0 | 0 | 0        | 0        | 0 | 0 | 0 | 0 | 0 |
| 0 | 0 | 0.000131 | 0        | 0 | 0 | 0 | 0 | 0 |
| 0 | 0 | 0        | 0        | 0 | 0 | 0 | 0 | 0 |
| 0 | 0 | 0        | 0        | 0 | 0 | 0 | 0 | 0 |
| 0 | 0 | 0        | 0        | 0 | 0 | 0 | 0 | 0 |
| 0 | 0 | 0        | 0        | 0 | 0 | 0 | 0 | 0 |
| 0 | 0 | 6.57E-05 | 0        | 0 | 0 | 0 | 0 | 0 |
| 0 | 0 | 0.000296 | 0        | 0 | 0 | 0 | 0 | 0 |
| 0 | 0 | 0        | 6.57E-05 | 0 | 0 | 0 | 0 | 0 |
| 0 | 0 | 3.29E-05 | 0        | 0 | 0 | 0 | 0 | 0 |
| 0 | 0 | 0        | 0        | 0 | 0 | 0 | 0 | 0 |
| 0 | 0 | 3.29E-05 | 0        | 0 | 0 | 0 | 0 | 0 |
| 0 | 0 | 0.000164 | 0        | 0 | 0 | 0 | 0 | 0 |
| 0 | 0 | 0        | 0        | 0 | 0 | 0 | 0 | 0 |
| 0 | 0 | 0.001019 | 0        | 0 | 0 | 0 | 0 | 0 |
| 0 | 0 | 0        | 0        | 0 | 0 | 0 | 0 | 0 |
| 0 | 0 | 0.001907 | 0        | 0 | 0 | 0 | 0 | 0 |
| 0 | 0 | 6.57E-05 | 0        | 0 | 0 | 0 | 0 | 0 |
| 0 | 0 | 0        | 0        | 0 | 0 | 0 | 0 | 0 |
| 0 | 0 | 0        | 0        | 0 | 0 | 0 | 0 | 0 |
| 0 | 0 | 6.57E-05 | 0        | 0 | 0 | 0 | 0 | 0 |
| 0 | 0 | 0        | 0        | 0 | 0 | 0 | 0 | 0 |
| 0 | 0 | 0        | 0        | 0 | 0 | 0 | 0 | 0 |
| 0 | 0 | 9.86E-05 | 0        | 0 | 0 | 0 | 0 | 0 |
| 0 | 0 | 0        | 0        | 0 | 0 | 0 | 0 | 0 |
| 0 | 0 | 0        | 0        | 0 | 0 | 0 | 0 | 0 |
| 0 | 0 | 0        | 0        | 0 | 0 | 0 | 0 | 0 |
| 0 | 0 | 0        | 0        | 0 | 0 | 0 | 0 | 0 |
| 0 | 0 | 0.001709 | 0        | 0 | 0 | 0 | 0 | 0 |
| 0 | 0 | 3.29E-05 | 0        | 0 | 0 | 0 | 0 | 0 |

|   |   |          |   |   |   |          |   |   |
|---|---|----------|---|---|---|----------|---|---|
| 0 | 0 | 3.29E-05 | 0 | 0 | 0 | 0        | 0 | 0 |
| 0 | 0 | 0        | 0 | 0 | 0 | 0        | 0 | 0 |
| 0 | 0 | 0.000131 | 0 | 0 | 0 | 0        | 0 | 0 |
| 0 | 0 | 0        | 0 | 0 | 0 | 0        | 0 | 0 |
| 0 | 0 | 0        | 0 | 0 | 0 | 0        | 0 | 0 |
| 0 | 0 | 0.000131 | 0 | 0 | 0 | 0        | 0 | 0 |
| 0 | 0 | 9.86E-05 | 0 | 0 | 0 | 0        | 0 | 0 |
| 0 | 0 | 3.29E-05 | 0 | 0 | 0 | 0        | 0 | 0 |
| 0 | 0 | 3.29E-05 | 0 | 0 | 0 | 3.29E-05 | 0 | 0 |
| 0 | 0 | 0.00092  | 0 | 0 | 0 | 0        | 0 | 0 |
| 0 | 0 | 6.57E-05 | 0 | 0 | 0 | 0        | 0 | 0 |
| 0 | 0 | 0        | 0 | 0 | 0 | 0        | 0 | 0 |
| 0 | 0 | 0        | 0 | 0 | 0 | 0        | 0 | 0 |
| 0 | 0 | 3.29E-05 | 0 | 0 | 0 | 0        | 0 | 0 |
| 0 | 0 | 0        | 0 | 0 | 0 | 0        | 0 | 0 |
| 0 | 0 | 0        | 0 | 0 | 0 | 0        | 0 | 0 |
| 0 | 0 | 9.86E-05 | 0 | 0 | 0 | 0        | 0 | 0 |
| 0 | 0 | 0.000131 | 0 | 0 | 0 | 0        | 0 | 0 |
| 0 | 0 | 6.57E-05 | 0 | 0 | 0 | 0        | 0 | 0 |
| 0 | 0 | 0.000197 | 0 | 0 | 0 | 0        | 0 | 0 |
| 0 | 0 | 0        | 0 | 0 | 0 | 0        | 0 | 0 |
| 0 | 0 | 0.000131 | 0 | 0 | 0 | 0        | 0 | 0 |
| 0 | 0 | 0.001677 | 0 | 0 | 0 | 0        | 0 | 0 |
| 0 | 0 | 0        | 0 | 0 | 0 | 0        | 0 | 0 |
| 0 | 0 | 0.000131 | 0 | 0 | 0 | 0        | 0 | 0 |
| 0 | 0 | 0        | 0 | 0 | 0 | 0        | 0 | 0 |
| 0 | 0 | 6.57E-05 | 0 | 0 | 0 | 0        | 0 | 0 |
| 0 | 0 | 0.000164 | 0 | 0 | 0 | 0        | 0 | 0 |
| 0 | 0 | 0.000131 | 0 | 0 | 0 | 0        | 0 | 0 |
| 0 | 0 | 0.001052 | 0 | 0 | 0 | 0        | 0 | 0 |
| 0 | 0 | 0.000526 | 0 | 0 | 0 | 0        | 0 | 0 |
| 0 | 0 | 0        | 0 | 0 | 0 | 0        | 0 | 0 |
| 0 | 0 | 0.000263 | 0 | 0 | 0 | 0        | 0 | 0 |
| 0 | 0 | 3.29E-05 | 0 | 0 | 0 | 0        | 0 | 0 |
| 0 | 0 | 0.001677 | 0 | 0 | 0 | 0        | 0 | 0 |
| 0 | 0 | 0        | 0 | 0 | 0 | 0        | 0 | 0 |
| 0 | 0 | 0.000329 | 0 | 0 | 0 | 0        | 0 | 0 |
| 0 | 0 | 3.29E-05 | 0 | 0 | 0 | 0        | 0 | 0 |
| 0 | 0 | 0.000394 | 0 | 0 | 0 | 0        | 0 | 0 |
| 0 | 0 | 0.001841 | 0 | 0 | 0 | 0        | 0 | 0 |
| 0 | 0 | 0.001052 | 0 | 0 | 0 | 0        | 0 | 0 |
| 0 | 0 | 0.000131 | 0 | 0 | 0 | 0        | 0 | 0 |
| 0 | 0 | 3.29E-05 | 0 | 0 | 0 | 0        | 0 | 0 |
| 0 | 0 | 0        | 0 | 0 | 0 | 0        | 0 | 0 |
| 0 | 0 | 9.86E-05 | 0 | 0 | 0 | 0        | 0 | 0 |
| 0 | 0 | 3.29E-05 | 0 | 0 | 0 | 0        | 0 | 0 |
| 0 | 0 | 0.000164 | 0 | 0 | 0 | 0        | 0 | 0 |

|   |   |          |   |   |   |   |   |   |
|---|---|----------|---|---|---|---|---|---|
| 0 | 0 | 0        | 0 | 0 | 0 | 0 | 0 | 0 |
| 0 | 0 | 0.000263 | 0 | 0 | 0 | 0 | 0 | 0 |
| 0 | 0 | 0        | 0 | 0 | 0 | 0 | 0 | 0 |
| 0 | 0 | 0.001479 | 0 | 0 | 0 | 0 | 0 | 0 |
| 0 | 0 | 0.000427 | 0 | 0 | 0 | 0 | 0 | 0 |
| 0 | 0 | 9.86E-05 | 0 | 0 | 0 | 0 | 0 | 0 |
| 0 | 0 | 0        | 0 | 0 | 0 | 0 | 0 | 0 |
| 0 | 0 | 6.57E-05 | 0 | 0 | 0 | 0 | 0 | 0 |
| 0 | 0 | 0.000131 | 0 | 0 | 0 | 0 | 0 | 0 |
| 0 | 0 | 0        | 0 | 0 | 0 | 0 | 0 | 0 |
| 0 | 0 | 0        | 0 | 0 | 0 | 0 | 0 | 0 |
| 0 | 0 | 6.57E-05 | 0 | 0 | 0 | 0 | 0 | 0 |
| 0 | 0 | 0        | 0 | 0 | 0 | 0 | 0 | 0 |
| 0 | 0 | 0        | 0 | 0 | 0 | 0 | 0 | 0 |
| 0 | 0 | 9.86E-05 | 0 | 0 | 0 | 0 | 0 | 0 |
| 0 | 0 | 0        | 0 | 0 | 0 | 0 | 0 | 0 |
| 0 | 0 | 0        | 0 | 0 | 0 | 0 | 0 | 0 |
| 0 | 0 | 6.57E-05 | 0 | 0 | 0 | 0 | 0 | 0 |
| 0 | 0 | 0.000362 | 0 | 0 | 0 | 0 | 0 | 0 |
| 0 | 0 | 0.000329 | 0 | 0 | 0 | 0 | 0 | 0 |
| 0 | 0 | 0        | 0 | 0 | 0 | 0 | 0 | 0 |
| 0 | 0 | 3.29E-05 | 0 | 0 | 0 | 0 | 0 | 0 |
| 0 | 0 | 0        | 0 | 0 | 0 | 0 | 0 | 0 |
| 0 | 0 | 0        | 0 | 0 | 0 | 0 | 0 | 0 |
| 0 | 0 | 6.57E-05 | 0 | 0 | 0 | 0 | 0 | 0 |
| 0 | 0 | 0.000164 | 0 | 0 | 0 | 0 | 0 | 0 |
| 0 | 0 | 0        | 0 | 0 | 0 | 0 | 0 | 0 |
| 0 | 0 | 0        | 0 | 0 | 0 | 0 | 0 | 0 |
| 0 | 0 | 0        | 0 | 0 | 0 | 0 | 0 | 0 |
| 0 | 0 | 0        | 0 | 0 | 0 | 0 | 0 | 0 |
| 0 | 0 | 0        | 0 | 0 | 0 | 0 | 0 | 0 |
| 0 | 0 | 0        | 0 | 0 | 0 | 0 | 0 | 0 |
| 0 | 0 | 0        | 0 | 0 | 0 | 0 | 0 | 0 |
| 0 | 0 | 6.57E-05 | 0 | 0 | 0 | 0 | 0 | 0 |
| 0 | 0 | 0        | 0 | 0 | 0 | 0 | 0 | 0 |
| 0 | 0 | 0.001019 | 0 | 0 | 0 | 0 | 0 | 0 |
| 0 | 0 | 6.57E-05 | 0 | 0 | 0 | 0 | 0 | 0 |
| 0 | 0 | 9.86E-05 | 0 | 0 | 0 | 0 | 0 | 0 |
| 0 | 0 | 0.000526 | 0 | 0 | 0 | 0 | 0 | 0 |
| 0 | 0 | 0        | 0 | 0 | 0 | 0 | 0 | 0 |
| 0 | 0 | 0.000526 | 0 | 0 | 0 | 0 | 0 | 0 |
| 0 | 0 | 6.57E-05 | 0 | 0 | 0 | 0 | 0 | 0 |
| 0 | 0 | 0.000296 | 0 | 0 | 0 | 0 | 0 | 0 |
| 0 | 0 | 0        | 0 | 0 | 0 | 0 | 0 | 0 |
| 0 | 0 | 0.000723 | 0 | 0 | 0 | 0 | 0 | 0 |
| 0 | 0 | 3.29E-05 | 0 | 0 | 0 | 0 | 0 | 0 |
| 0 | 0 | 0.00046  | 0 | 0 | 0 | 0 | 0 | 0 |



| k_Bacteri |
|-----------|-----------|-----------|-----------|-----------|-----------|-----------|-----------|-----------|
| 0         | 0         | 0         | 0         | 0         | 0         | 0         | 6.57E-05  | 0         |
| 0         | 0         | 0         | 0.000164  | 0         | 0         | 0         | 3.29E-05  | 0         |
| 0         | 0         | 0         | 6.57E-05  | 0         | 0         | 0         | 0.000164  | 0         |
| 0         | 0         | 0         | 0.000131  | 0         | 0         | 0         | 3.29E-05  | 0         |
| 0         | 0         | 0         | 9.86E-05  | 0         | 0         | 0         | 0.000131  | 0         |
| 0         | 0         | 0         | 6.57E-05  | 0         | 0         | 0         | 0.000197  | 0         |
| 0         | 0         | 0         | 0.000164  | 0         | 0         | 0         | 0         | 0         |
| 0         | 0         | 0         | 6.57E-05  | 0         | 0         | 0         | 0         | 0         |
| 0         | 0         | 0         | 0.000526  | 0         | 0         | 0         | 0.000789  | 0         |
| 0         | 0         | 0         | 6.57E-05  | 0         | 0         | 0         | 0.001512  | 0         |
| 0         | 0         | 0         | 0.000197  | 0         | 0         | 0         | 6.57E-05  | 0         |
| 0         | 0         | 0         | 0         | 0         | 0         | 0         | 0.000263  | 0         |
| 0         | 0         | 0         | 0         | 0         | 0         | 0         | 0.000657  | 0         |
| 0         | 0         | 0         | 9.86E-05  | 0         | 0         | 0         | 6.57E-05  | 0         |
| 0         | 0         | 0         | 3.29E-05  | 0         | 0         | 0         | 3.29E-05  | 0         |
| 0         | 0         | 0         | 0         | 0         | 0         | 0         | 0.001841  | 0         |
| 0         | 0         | 0         | 0         | 0         | 0         | 0         | 0.000657  | 0         |
| 0         | 0         | 0         | 0         | 0         | 0         | 0         | 0         | 0         |
| 0         | 0         | 0         | 3.29E-05  | 0         | 0         | 0         | 0         | 0         |
| 0         | 0         | 0         | 0         | 0         | 0         | 0         | 3.29E-05  | 0         |
| 0         | 0         | 0         | 0         | 0         | 0         | 0         | 0.000164  | 0         |
| 0         | 0         | 0         | 0         | 0         | 0         | 0         | 0.001907  | 0         |
| 0         | 0         | 0         | 0         | 0         | 0         | 3.29E-05  | 0.004241  | 0         |
| 0         | 0         | 0         | 0         | 0         | 0         | 0         | 0.001085  | 0         |
| 0         | 0         | 0         | 0         | 0         | 0         | 0         | 0.001709  | 0         |
| 0         | 0         | 0         | 6.57E-05  | 0         | 0         | 0         | 0.007265  | 0         |
| 0         | 0         | 0         | 0         | 0         | 0         | 0         | 0.015352  | 6.57E-05  |
| 0         | 0         | 0         | 0         | 0         | 0         | 0         | 0.002761  | 0         |
| 0         | 0         | 0         | 0         | 0         | 0         | 0         | 0.000493  | 0         |
| 0         | 0         | 0         | 3.29E-05  | 0         | 0         | 0         | 0.000164  | 0         |
| 0         | 0         | 0         | 0         | 0         | 0         | 0         | 0.000164  | 0         |
| 0         | 0         | 0         | 3.29E-05  | 0         | 0         | 0         | 0.000197  | 0         |
| 0         | 0         | 0         | 0         | 0         | 0         | 0         | 3.29E-05  | 0         |
| 0         | 0         | 0         | 6.57E-05  | 0         | 0         | 6.57E-05  | 0.004142  | 0         |
| 0         | 0         | 0         | 0         | 0         | 0         | 0         | 0.003452  | 0         |
| 0         | 0         | 0         | 0         | 0         | 0         | 0         | 0.001578  | 0         |
| 0         | 0         | 0         | 9.86E-05  | 0         | 0         | 0         | 0.003222  | 0         |
| 0         | 0         | 0         | 0         | 0         | 0         | 0         | 0.005358  | 0.000362  |
| 0         | 0         | 0         | 0         | 0         | 0         | 0         | 0.004668  | 0         |
| 0         | 0         | 0         | 0         | 0         | 0         | 0         | 0.004833  | 0         |
| 0         | 0         | 0         | 0         | 0         | 0         | 0         | 0.003682  | 0         |
| 0         | 0         | 0         | 0.000131  | 0         | 0         | 0         | 0.001282  | 0         |
| 0         | 0         | 0         | 0.000164  | 0         | 0         | 0         | 0.002959  | 0         |
| 0         | 0         | 0         | 0         | 0         | 0         | 0         | 0.000822  | 0         |









|   |   |   |          |   |          |          |          |          |
|---|---|---|----------|---|----------|----------|----------|----------|
| 0 | 0 | 0 | 0        | 0 | 0        | 0        | 0        | 0        |
| 0 | 0 | 0 | 0        | 0 | 0        | 0        | 0        | 0        |
| 0 | 0 | 0 | 0        | 0 | 0.000164 | 0        | 3.29E-05 | 0        |
| 0 | 0 | 0 | 0        | 0 | 0        | 0        | 0        | 0        |
| 0 | 0 | 0 | 0        | 0 | 0        | 0        | 0.00023  | 0        |
| 0 | 0 | 0 | 0        | 0 | 0        | 0        | 0.000789 | 0        |
| 0 | 0 | 0 | 9.86E-05 | 0 | 0        | 0        | 0.002367 | 0        |
| 0 | 0 | 0 | 9.86E-05 | 0 | 0        | 0        | 0.001249 | 3.29E-05 |
| 0 | 0 | 0 | 0.004833 | 0 | 0        | 0        | 0.000625 | 0        |
| 0 | 0 | 0 | 0        | 0 | 0        | 3.29E-05 | 0.030474 | 3.29E-05 |
| 0 | 0 | 0 | 3.29E-05 | 0 | 0        | 0        | 0.009862 | 3.29E-05 |
| 0 | 0 | 0 | 0        | 0 | 6.57E-05 | 0        | 0.007298 | 0        |
| 0 | 0 | 0 | 0        | 0 | 0        | 0        | 0.002367 | 0        |
| 0 | 0 | 0 | 0        | 0 | 0        | 0        | 0.001085 | 0        |
| 0 | 0 | 0 | 0        | 0 | 0        | 0        | 0.003222 | 0        |
| 0 | 0 | 0 | 0        | 0 | 0        | 3.29E-05 | 0.013807 | 0        |
| 0 | 0 | 0 | 0        | 0 | 0        | 3.29E-05 | 0.030409 | 0        |
| 0 | 0 | 0 | 9.86E-05 | 0 | 0        | 0        | 0.003813 | 0        |
| 0 | 0 | 0 | 0        | 0 | 0        | 0        | 0.005293 | 9.86E-05 |
| 0 | 0 | 0 | 6.57E-05 | 0 | 0        | 3.29E-05 | 0.010618 | 3.29E-05 |
| 0 | 0 | 0 | 0.000131 | 0 | 0        | 0        | 0.033565 | 0.000131 |
| 0 | 0 | 0 | 0.000362 | 0 | 0        | 0        | 0        | 0        |
| 0 | 0 | 0 | 0        | 0 | 0        | 0        | 0.000394 | 0        |
| 0 | 0 | 0 | 0        | 0 | 0        | 0        | 0.000296 | 0        |
| 0 | 0 | 0 | 0        | 0 | 0        | 0        | 0.000756 | 0        |
| 0 | 0 | 0 | 0        | 0 | 0        | 0        | 0.017423 | 6.57E-05 |
| 0 | 0 | 0 | 0.001644 | 0 | 0        | 0        | 0.004833 | 0        |
| 0 | 0 | 0 | 0.000657 | 0 | 0        | 0        | 0.003057 | 0        |
| 0 | 0 | 0 | 6.57E-05 | 0 | 0        | 0        | 0.006345 | 0        |
| 0 | 0 | 0 | 0        | 0 | 0        | 0        | 0.001151 | 0        |
| 0 | 0 | 0 | 3.29E-05 | 0 | 0        | 0        | 0.009534 | 0        |
| 0 | 0 | 0 | 6.57E-05 | 0 | 0        | 0        | 0.000263 | 0        |
| 0 | 0 | 0 | 0        | 0 | 0        | 0        | 0.000329 | 0        |
| 0 | 0 | 0 | 0        | 0 | 0        | 0        | 0.002235 | 0        |
| 0 | 0 | 0 | 0        | 0 | 0        | 0        | 0.004307 | 0        |
| 0 | 0 | 0 | 3.29E-05 | 0 | 0        | 0        | 0.001874 | 0        |
| 0 | 0 | 0 | 0        | 0 | 0        | 0        | 0.002498 | 0        |
| 0 | 0 | 0 | 0        | 0 | 0        | 0        | 0.001414 | 0        |
| 0 | 0 | 0 | 0        | 0 | 0        | 0        | 0.004931 | 0        |
| 0 | 0 | 0 | 3.29E-05 | 0 | 0        | 0        | 0.006871 | 0        |
| 0 | 0 | 0 | 0        | 0 | 0        | 0        | 0.001315 | 0        |
| 0 | 0 | 0 | 0.003353 | 0 | 0        | 0        | 0.001578 | 0        |
| 0 | 0 | 0 | 0        | 0 | 0        | 0        | 0.012328 | 0        |
| 0 | 0 | 0 | 0        | 0 | 0        | 0        | 0.005852 | 0        |
| 0 | 0 | 0 | 0        | 0 | 0        | 0        | 0.007462 | 0        |
| 0 | 0 | 0 | 0.000197 | 0 | 0        | 0        | 0.006147 | 0        |
| 0 | 0 | 0 | 6.57E-05 | 0 | 0        | 0        | 0.003978 | 0        |

|   |   |   |          |          |   |          |          |          |
|---|---|---|----------|----------|---|----------|----------|----------|
| 0 | 0 | 0 | 6.57E-05 | 0        | 0 | 0        | 0.003715 | 0        |
| 0 | 0 | 0 | 0.000559 | 0        | 0 | 0        | 0.005589 | 0        |
| 0 | 0 | 0 | 0        | 0        | 0 | 3.29E-05 | 0.00858  | 0        |
| 0 | 0 | 0 | 9.86E-05 | 0        | 0 | 0        | 0.000427 | 0        |
| 0 | 0 | 0 | 6.57E-05 | 0        | 0 | 0        | 0.000493 | 0        |
| 0 | 0 | 0 | 0        | 0        | 0 | 0        | 9.86E-05 | 0        |
| 0 | 0 | 0 | 0.000493 | 0        | 0 | 9.86E-05 | 0.005194 | 0        |
| 0 | 0 | 0 | 0        | 0        | 0 | 0        | 3.29E-05 | 0        |
| 0 | 0 | 0 | 0.000526 | 0        | 0 | 0        | 0        | 0        |
| 0 | 0 | 0 | 0        | 0        | 0 | 0        | 0        | 0        |
| 0 | 0 | 0 | 0.000592 | 0        | 0 | 0        | 0        | 0        |
| 0 | 0 | 0 | 0.00023  | 0        | 0 | 3.29E-05 | 0.025379 | 9.86E-05 |
| 0 | 0 | 0 | 9.86E-05 | 0        | 0 | 0        | 9.86E-05 | 0        |
| 0 | 0 | 0 | 0        | 0        | 0 | 0.000394 | 0.000953 | 0        |
| 0 | 0 | 0 | 3.29E-05 | 0        | 0 | 3.29E-05 | 0.014892 | 3.29E-05 |
| 0 | 0 | 0 | 0        | 0        | 0 | 0        | 0.004208 | 0        |
| 0 | 0 | 0 | 6.57E-05 | 0        | 0 | 0        | 0.013051 | 0        |
| 0 | 0 | 0 | 6.57E-05 | 0        | 0 | 0        | 0.004997 | 0        |
| 0 | 0 | 0 | 0        | 0        | 0 | 0        | 0.011276 | 0        |
| 0 | 0 | 0 | 0        | 0        | 0 | 0        | 0.013183 | 0        |
| 0 | 0 | 0 | 0        | 0        | 0 | 0        | 0.009731 | 3.29E-05 |
| 0 | 0 | 0 | 0.00023  | 0        | 0 | 0        | 0.00572  | 3.29E-05 |
| 0 | 0 | 0 | 0        | 0        | 0 | 0        | 0.001644 | 0        |
| 0 | 0 | 0 | 0        | 0        | 0 | 0        | 0.004865 | 0        |
| 0 | 0 | 0 | 0        | 0        | 0 | 0        | 3.29E-05 | 0        |
| 0 | 0 | 0 | 0        | 0        | 0 | 0        | 0        | 0        |
| 0 | 0 | 0 | 0        | 0        | 0 | 0        | 0        | 0        |
| 0 | 0 | 0 | 0        | 0        | 0 | 0        | 6.57E-05 | 0        |
| 0 | 0 | 0 | 3.29E-05 | 0        | 0 | 0        | 0.000394 | 0        |
| 0 | 0 | 0 | 0        | 0        | 0 | 0        | 0        | 0        |
| 0 | 0 | 0 | 0        | 0        | 0 | 0        | 0        | 0        |
| 0 | 0 | 0 | 0        | 0        | 0 | 0        | 0.001907 | 0        |
| 0 | 0 | 0 | 0        | 0        | 0 | 0        | 9.86E-05 | 0        |
| 0 | 0 | 0 | 0        | 0        | 0 | 0        | 0.000131 | 0        |
| 0 | 0 | 0 | 0.000164 | 0        | 0 | 0        | 0.022059 | 9.86E-05 |
| 0 | 0 | 0 | 6.57E-05 | 0        | 0 | 0        | 0.010454 | 0        |
| 0 | 0 | 0 | 0        | 0        | 0 | 0        | 0.006641 | 0        |
| 0 | 0 | 0 | 3.29E-05 | 3.29E-05 | 0 | 0        | 0.002433 | 3.29E-05 |
| 0 | 0 | 0 | 0.001249 | 0        | 0 | 0        | 0.0048   | 0        |
| 0 | 0 | 0 | 0        | 0        | 0 | 0        | 0.007199 | 0        |
| 0 | 0 | 0 | 6.57E-05 | 0        | 0 | 0        | 0.015714 | 0        |
| 0 | 0 | 0 | 0.000296 | 0        | 0 | 0        | 0.006279 | 0        |
| 0 | 0 | 0 | 3.29E-05 | 0        | 0 | 3.29E-05 | 0.007923 | 0        |
| 0 | 0 | 0 | 0        | 0        | 0 | 0        | 0.004241 | 3.29E-05 |
| 0 | 0 | 0 | 0        | 0        | 0 | 0        | 0.000986 | 0        |
| 0 | 0 | 0 | 0        | 0        | 0 | 0        | 0.003846 | 3.29E-05 |
| 0 | 0 | 0 | 3.29E-05 | 0        | 0 | 0        | 0.001709 | 0        |

|   |   |   |          |   |   |          |          |          |
|---|---|---|----------|---|---|----------|----------|----------|
| 0 | 0 | 0 | 3.29E-05 | 0 | 0 | 0        | 0.023867 | 0.000263 |
| 0 | 0 | 0 | 3.29E-05 | 0 | 0 | 3.29E-05 | 0.004865 | 0        |
| 0 | 0 | 0 | 0        | 0 | 0 | 0        | 0.00263  | 0        |
| 0 | 0 | 0 | 0        | 0 | 0 | 0        | 0.003781 | 0        |
| 0 | 0 | 0 | 0        | 0 | 0 | 0        | 0.003156 | 0        |
| 0 | 0 | 0 | 9.86E-05 | 0 | 0 | 3.29E-05 | 0.019856 | 0        |
| 0 | 0 | 0 | 3.29E-05 | 0 | 0 | 0        | 0.000625 | 0        |
| 0 | 0 | 0 | 0        | 0 | 0 | 0        | 0.001874 | 0        |
| 0 | 0 | 0 | 0        | 0 | 0 | 0        | 0.005424 | 0        |
| 0 | 0 | 0 | 0        | 0 | 0 | 0        | 0.006706 | 3.29E-05 |
| 0 | 0 | 0 | 0        | 0 | 0 | 0        | 0.002301 | 0        |
| 0 | 0 | 0 | 0        | 0 | 0 | 0        | 0.000822 | 0        |
| 0 | 0 | 0 | 0        | 0 | 0 | 0        | 0.009599 | 0        |
| 0 | 0 | 0 | 0        | 0 | 0 | 0        | 0.002498 | 0        |
| 0 | 0 | 0 | 0.00023  | 0 | 0 | 0        | 0.003123 | 0        |
| 0 | 0 | 0 | 0.000164 | 0 | 0 | 0        | 0.003912 | 0        |
| 0 | 0 | 0 | 0        | 0 | 0 | 0        | 0.000559 | 0        |
| 0 | 0 | 0 | 0.000131 | 0 | 0 | 0        | 0.00069  | 0        |
| 0 | 0 | 0 | 0        | 0 | 0 | 0        | 0.003123 | 0        |
| 0 | 0 | 0 | 0        | 0 | 0 | 0        | 0.003518 | 0        |
| 0 | 0 | 0 | 0        | 0 | 0 | 0        | 0.000822 | 0        |
| 0 | 0 | 0 | 0        | 0 | 0 | 0        | 0.001085 | 0        |
| 0 | 0 | 0 | 6.57E-05 | 0 | 0 | 6.57E-05 | 0.002827 | 0        |
| 0 | 0 | 0 | 0        | 0 | 0 | 0        | 0.001677 | 9.86E-05 |
| 0 | 0 | 0 | 0        | 0 | 0 | 0        | 3.29E-05 | 0        |
| 0 | 0 | 0 | 3.29E-05 | 0 | 0 | 0        | 0        | 0        |
| 0 | 0 | 0 | 0        | 0 | 0 | 0        | 6.57E-05 | 0        |
| 0 | 0 | 0 | 0.000427 | 0 | 0 | 0        | 0.000131 | 0        |
| 0 | 0 | 0 | 0        | 0 | 0 | 0        | 0.003255 | 0        |
| 0 | 0 | 0 | 0        | 0 | 0 | 0        | 3.29E-05 | 0        |
| 0 | 0 | 0 | 0        | 0 | 0 | 3.29E-05 | 0.00023  | 0        |
| 0 | 0 | 0 | 0        | 0 | 0 | 3.29E-05 | 0.007824 | 0        |
| 0 | 0 | 0 | 0        | 0 | 0 | 0        | 0.004372 | 0        |
| 0 | 0 | 0 | 0        | 0 | 0 | 0        | 0.000427 | 0        |
| 0 | 0 | 0 | 0        | 0 | 0 | 0        | 0.000164 | 0        |
| 0 | 0 | 0 | 0        | 0 | 0 | 0        | 6.57E-05 | 0        |
| 0 | 0 | 0 | 0        | 0 | 0 | 0        | 0.010585 | 0        |
| 0 | 0 | 0 | 0        | 0 | 0 | 0        | 0.000263 | 0        |
| 0 | 0 | 0 | 0        | 0 | 0 | 0        | 0.031756 | 3.29E-05 |
| 0 | 0 | 0 | 0        | 0 | 0 | 3.29E-05 | 0.002663 | 0        |
| 0 | 0 | 0 | 0        | 0 | 0 | 0        | 0.015549 | 0        |
| 0 | 0 | 0 | 0        | 0 | 0 | 0        | 0.014761 | 3.29E-05 |
| 0 | 0 | 0 | 0        | 0 | 0 | 0        | 0.007002 | 3.29E-05 |
| 0 | 0 | 0 | 0        | 0 | 0 | 6.57E-05 | 0.023834 | 9.86E-05 |
| 0 | 0 | 0 | 0        | 0 | 0 | 0        | 0.011243 | 0        |
| 0 | 0 | 0 | 0        | 0 | 0 | 0        | 0.022322 | 3.29E-05 |
| 0 | 0 | 0 | 6.57E-05 | 0 | 0 | 0        | 0.001644 | 3.29E-05 |

|          |   |   |          |   |   |          |          |          |
|----------|---|---|----------|---|---|----------|----------|----------|
| 0        | 0 | 0 | 0        | 0 | 0 | 0        | 0.003978 | 0        |
| 0        | 0 | 0 | 0        | 0 | 0 | 0        | 0.012163 | 0        |
| 0        | 0 | 0 | 6.57E-05 | 0 | 0 | 0        | 0.000493 | 0        |
| 0        | 0 | 0 | 0        | 0 | 0 | 3.29E-05 | 0.034189 | 3.29E-05 |
| 0        | 0 | 0 | 0        | 0 | 0 | 6.57E-05 | 0.011111 | 3.29E-05 |
| 0        | 0 | 0 | 0        | 0 | 0 | 3.29E-05 | 0.033959 | 6.57E-05 |
| 0        | 0 | 0 | 0        | 0 | 0 | 0        | 0.004044 | 0        |
| 0        | 0 | 0 | 9.86E-05 | 0 | 0 | 0        | 0.003583 | 0        |
| 0        | 0 | 0 | 0        | 0 | 0 | 0        | 0.008909 | 0        |
| 0        | 0 | 0 | 0        | 0 | 0 | 0        | 0.005227 | 0        |
| 0        | 0 | 0 | 6.57E-05 | 0 | 0 | 0        | 0.006542 | 0        |
| 0        | 0 | 0 | 0        | 0 | 0 | 0        | 0.000197 | 0        |
| 0        | 0 | 0 | 0        | 0 | 0 | 0        | 0.00503  | 0        |
| 0        | 0 | 0 | 0        | 0 | 0 | 0        | 0.016174 | 3.29E-05 |
| 0        | 0 | 0 | 0        | 0 | 0 | 0        | 0.008876 | 3.29E-05 |
| 0        | 0 | 0 | 0        | 0 | 0 | 0        | 0.00023  | 0        |
| 0        | 0 | 0 | 0        | 0 | 0 | 0        | 0.000789 | 0        |
| 0        | 0 | 0 | 0        | 0 | 0 | 0        | 0.003912 | 0        |
| 0        | 0 | 0 | 0        | 0 | 0 | 0        | 0.000822 | 0        |
| 0        | 0 | 0 | 3.29E-05 | 0 | 0 | 0        | 0.005326 | 0        |
| 0        | 0 | 0 | 0        | 0 | 0 | 0        | 0.000888 | 0        |
| 0        | 0 | 0 | 0        | 0 | 0 | 0        | 0.004734 | 0        |
| 0        | 0 | 0 | 3.29E-05 | 0 | 0 | 0        | 0.005753 | 0        |
| 0        | 0 | 0 | 0        | 0 | 0 | 0        | 0.001249 | 0        |
| 0        | 0 | 0 | 0        | 0 | 0 | 0        | 0.001216 | 0        |
| 0        | 0 | 0 | 0        | 0 | 0 | 0        | 0.001578 | 0        |
| 0        | 0 | 0 | 0        | 0 | 0 | 0        | 0.002729 | 0        |
| 0        | 0 | 0 | 0        | 0 | 0 | 0        | 0.000526 | 0        |
| 0        | 0 | 0 | 0        | 0 | 0 | 0        | 0.000263 | 0        |
| 0        | 0 | 0 | 0        | 0 | 0 | 0        | 0.000986 | 0        |
| 0        | 0 | 0 | 0        | 0 | 0 | 0        | 0.00046  | 0        |
| 0        | 0 | 0 | 9.86E-05 | 0 | 0 | 0        | 0        | 0        |
| 0        | 0 | 0 | 0        | 0 | 0 | 0        | 0.001052 | 0        |
| 0        | 0 | 0 | 0        | 0 | 0 | 0        | 3.29E-05 | 0        |
| 0        | 0 | 0 | 0        | 0 | 0 | 0        | 0        | 0        |
| 0        | 0 | 0 | 6.57E-05 | 0 | 0 | 0        | 3.29E-05 | 0        |
| 0.000164 | 0 | 0 | 3.29E-05 | 0 | 0 | 0        | 0.005753 | 0        |
| 0        | 0 | 0 | 0        | 0 | 0 | 0        | 0.004405 | 0        |
| 0        | 0 | 0 | 0        | 0 | 0 | 0        | 0.002959 | 0        |
| 0        | 0 | 0 | 0.003024 | 0 | 0 | 3.29E-05 | 0.060883 | 3.29E-05 |
| 0        | 0 | 0 | 0.000131 | 0 | 0 | 3.29E-05 | 0.012394 | 3.29E-05 |
| 0        | 0 | 0 | 6.57E-05 | 0 | 0 | 0        | 0.002597 | 0        |
| 0        | 0 | 0 | 0.00046  | 0 | 0 | 3.29E-05 | 0.006641 | 3.29E-05 |
| 0        | 0 | 0 | 0.000362 | 0 | 0 | 0        | 0.003386 | 0        |
| 0        | 0 | 0 | 0        | 0 | 0 | 0        | 0.001085 | 0        |
| 0        | 0 | 0 | 0.001907 | 0 | 0 | 0        | 0.026266 | 6.57E-05 |
| 0        | 0 | 0 | 0.000263 | 0 | 0 | 0        | 0.007561 | 6.57E-05 |



|   |   |   |          |   |   |          |          |          |
|---|---|---|----------|---|---|----------|----------|----------|
| 0 | 0 | 0 | 0        | 0 | 0 | 0        | 0.001151 | 0        |
| 0 | 0 | 0 | 0        | 0 | 0 | 0        | 0.009073 | 0        |
| 0 | 0 | 0 | 0        | 0 | 0 | 0        | 0.000164 | 0        |
| 0 | 0 | 0 | 0        | 0 | 0 | 0        | 0.016306 | 0        |
| 0 | 0 | 0 | 0        | 0 | 0 | 0        | 0.001742 | 3.29E-05 |
| 0 | 0 | 0 | 0        | 0 | 0 | 0        | 0.004011 | 0        |
| 0 | 0 | 0 | 0        | 0 | 0 | 0        | 0.003649 | 0        |
| 0 | 0 | 0 | 0        | 0 | 0 | 0        | 0.00023  | 0        |
| 0 | 0 | 0 | 0        | 0 | 0 | 0        | 0.003024 | 0        |
| 0 | 0 | 0 | 0        | 0 | 0 | 0        | 0.00023  | 0        |
| 0 | 0 | 0 | 0        | 0 | 0 | 0        | 0.001709 | 0        |
| 0 | 0 | 0 | 0        | 0 | 0 | 0        | 0.001446 | 3.29E-05 |
| 0 | 0 | 0 | 0        | 0 | 0 | 0        | 0.004307 | 0        |
| 0 | 0 | 0 | 0        | 0 | 0 | 0.000131 | 0.05559  | 3.29E-05 |
| 0 | 0 | 0 | 0        | 0 | 0 | 0        | 0.005917 | 0        |
| 0 | 0 | 0 | 0        | 0 | 0 | 0        | 0.000756 | 0        |
| 0 | 0 | 0 | 0.000197 | 0 | 0 | 0        | 0.008153 | 0        |
| 0 | 0 | 0 | 0        | 0 | 0 | 0        | 0.002926 | 0        |
| 0 | 0 | 0 | 9.86E-05 | 0 | 0 | 0        | 0.003682 | 0        |
| 0 | 0 | 0 | 0        | 0 | 0 | 0        | 0.001019 | 0        |
| 0 | 0 | 0 | 0        | 0 | 0 | 0        | 0.006345 | 3.29E-05 |
| 0 | 0 | 0 | 0        | 0 | 0 | 3.29E-05 | 0.008054 | 0        |
| 0 | 0 | 0 | 3.29E-05 | 0 | 0 | 3.29E-05 | 0.006641 | 3.29E-05 |
| 0 | 0 | 0 | 0        | 0 | 0 | 0        | 0.012098 | 3.29E-05 |
| 0 | 0 | 0 | 0        | 0 | 0 | 0.000131 | 0.018903 | 0        |
| 0 | 0 | 0 | 0        | 0 | 0 | 0        | 0.001348 | 0        |
| 0 | 0 | 0 | 0        | 0 | 0 | 0        | 0.007265 | 0        |
| 0 | 0 | 0 | 0        | 0 | 0 | 0        | 0.001841 | 0        |
| 0 | 0 | 0 | 0        | 0 | 0 | 0        | 0.000756 | 0        |
| 0 | 0 | 0 | 0        | 0 | 0 | 0        | 0.001874 | 0        |
| 0 | 0 | 0 | 0        | 0 | 0 | 0        | 0.003748 | 0.002433 |
| 0 | 0 | 0 | 0        | 0 | 0 | 0        | 0.004175 | 0        |
| 0 | 0 | 0 | 0.001085 | 0 | 0 | 0        | 0.00069  | 0        |
| 0 | 0 | 0 | 0        | 0 | 0 | 0        | 0.004208 | 0        |
| 0 | 0 | 0 | 6.57E-05 | 0 | 0 | 0        | 0.005983 | 0        |
| 0 | 0 | 0 | 0        | 0 | 0 | 0        | 6.57E-05 | 0        |
| 0 | 0 | 0 | 0        | 0 | 0 | 0        | 0.00046  | 0        |
| 0 | 0 | 0 | 0.001709 | 0 | 0 | 0        | 0.000131 | 0        |
| 0 | 0 | 0 | 0        | 0 | 0 | 0        | 0.000625 | 0        |
| 0 | 0 | 0 | 0        | 0 | 0 | 0        | 0        | 0        |
| 0 | 0 | 0 | 0        | 0 | 0 | 0        | 0.003715 | 0        |
| 0 | 0 | 0 | 0        | 0 | 0 | 0        | 0        | 0        |
| 0 | 0 | 0 | 0        | 0 | 0 | 0        | 3.29E-05 | 0        |
| 0 | 0 | 0 | 0        | 0 | 0 | 0        | 0.001019 | 0        |
| 0 | 0 | 0 | 0        | 0 | 0 | 0        | 3.29E-05 | 0        |
| 0 | 0 | 0 | 0.111969 | 0 | 0 | 3.29E-05 | 0.004208 | 0        |
| 0 | 0 | 0 | 0.001611 | 0 | 0 | 0        | 0.001315 | 0        |

|   |          |          |          |   |   |          |          |          |
|---|----------|----------|----------|---|---|----------|----------|----------|
| 0 | 0        | 0        | 0        | 0 | 0 | 0        | 0.004011 | 0        |
| 0 | 0        | 0        | 0        | 0 | 0 | 0        | 0.002104 | 3.29E-05 |
| 0 | 0        | 0        | 6.57E-05 | 0 | 0 | 0        | 0.00332  | 0        |
| 0 | 0        | 0        | 0        | 0 | 0 | 0        | 0.098754 | 0.000164 |
| 0 | 0        | 0        | 9.86E-05 | 0 | 0 | 0        | 0.004931 | 0        |
| 0 | 0        | 0        | 0        | 0 | 0 | 0        | 0.000822 | 0        |
| 0 | 0        | 0        | 0.000493 | 0 | 0 | 0        | 0.001019 | 0        |
| 0 | 0.000197 | 0        | 0.000164 | 0 | 0 | 0        | 0        | 0        |
| 0 | 0        | 0        | 0.000855 | 0 | 0 | 0        | 3.29E-05 | 0        |
| 0 | 0        | 0        | 0.008186 | 0 | 0 | 3.29E-05 | 0.003616 | 0        |
| 0 | 0        | 0        | 0.000362 | 0 | 0 | 0        | 0.000131 | 0        |
| 0 | 0        | 0        | 0.001216 | 0 | 0 | 0        | 0.00046  | 0        |
| 0 | 0        | 0        | 0.000888 | 0 | 0 | 0        | 0.00023  | 0        |
| 0 | 0        | 0        | 0.00069  | 0 | 0 | 0        | 0.00194  | 3.29E-05 |
| 0 | 0        | 0        | 0.002893 | 0 | 0 | 0        | 0.004602 | 0        |
| 0 | 0        | 6.57E-05 | 0.00069  | 0 | 0 | 0        | 6.57E-05 | 0        |
| 0 | 0        | 0        | 0.000197 | 0 | 0 | 0        | 0.00263  | 0        |
| 0 | 6.57E-05 | 0        | 6.57E-05 | 0 | 0 | 0        | 0.005293 | 0        |
| 0 | 0        | 0        | 0.00023  | 0 | 0 | 9.86E-05 | 0.005917 | 0        |
| 0 | 0        | 0        | 0        | 0 | 0 | 0        | 6.57E-05 | 0        |
| 0 | 0        | 0        | 0        | 0 | 0 | 0        | 0.00023  | 0        |
| 0 | 0        | 0        | 6.57E-05 | 0 | 0 | 0        | 0.000526 | 0        |
| 0 | 0        | 0        | 6.57E-05 | 0 | 0 | 0        | 0.015155 | 3.29E-05 |
| 0 | 0        | 0        | 0        | 0 | 0 | 0        | 0.003123 | 3.29E-05 |
| 0 | 0        | 0        | 3.29E-05 | 0 | 0 | 0        | 0.004044 | 0        |
| 0 | 0        | 0        | 0        | 0 | 0 | 0        | 0.002597 | 0        |
| 0 | 0        | 0        | 0        | 0 | 0 | 3.29E-05 | 0.028042 | 3.29E-05 |
| 0 | 0        | 0        | 0        | 0 | 0 | 0        | 0.003386 | 0        |
| 0 | 0        | 0        | 0.000296 | 0 | 0 | 3.29E-05 | 0.009501 | 0        |
| 0 | 0        | 0        | 0        | 0 | 0 | 6.57E-05 | 0.043197 | 3.29E-05 |
| 0 | 0        | 0        | 0        | 0 | 0 | 3.29E-05 | 0.045794 | 0.000197 |
| 0 | 0        | 0        | 6.57E-05 | 0 | 0 | 6.57E-05 | 0.016503 | 0        |
| 0 | 0        | 0        | 0        | 0 | 0 | 0        | 0.005095 | 3.29E-05 |
| 0 | 0        | 0        | 0        | 0 | 0 | 6.57E-05 | 0.031362 | 3.29E-05 |
| 0 | 0        | 0        | 0        | 0 | 0 | 0        | 0.005063 | 0        |
| 0 | 0        | 0        | 3.29E-05 | 0 | 0 | 0        | 0.004471 | 3.29E-05 |
| 0 | 0        | 0        | 0.000657 | 0 | 0 | 0        | 9.86E-05 | 0        |
| 0 | 0        | 0        | 0.001446 | 0 | 0 | 0        | 0.005589 | 0        |
| 0 | 0        | 0        | 0.002794 | 0 | 0 | 0        | 0.032973 | 0.000164 |
| 0 | 0        | 0        | 0.006279 | 0 | 0 | 0        | 0.009238 | 3.29E-05 |
| 0 | 0        | 0        | 0.021138 | 0 | 0 | 0        | 0.000394 | 0        |
| 0 | 0        | 0        | 3.29E-05 | 0 | 0 | 0        | 0.004372 | 0        |
| 0 | 0        | 0        | 0        | 0 | 0 | 0        | 0.004175 | 0        |
| 0 | 0        | 0        | 6.57E-05 | 0 | 0 | 0        | 0.002104 | 0        |
| 0 | 0        | 0        | 0.000197 | 0 | 0 | 3.29E-05 | 0.002959 | 0        |
| 0 | 0        | 0        | 0        | 0 | 0 | 0        | 0.006805 | 3.29E-05 |
| 0 | 0        | 0        | 3.29E-05 | 0 | 0 | 0        | 0.001907 | 0        |

|   |          |   |          |   |   |          |          |          |
|---|----------|---|----------|---|---|----------|----------|----------|
| 0 | 0        | 0 | 0        | 0 | 0 | 0        | 9.86E-05 | 0        |
| 0 | 0        | 0 | 0        | 0 | 0 | 6.57E-05 | 0.009106 | 0        |
| 0 | 0        | 0 | 3.29E-05 | 0 | 0 | 0        | 0.008482 | 3.29E-05 |
| 0 | 0        | 0 | 0        | 0 | 0 | 0        | 0.015977 | 6.57E-05 |
| 0 | 0        | 0 | 0        | 0 | 0 | 0        | 0.003255 | 3.29E-05 |
| 0 | 0        | 0 | 0        | 0 | 0 | 0        | 0.004405 | 0        |
| 0 | 0        | 0 | 0        | 0 | 0 | 0        | 0.010618 | 3.29E-05 |
| 0 | 0        | 0 | 0        | 0 | 0 | 0        | 0.002696 | 0        |
| 0 | 0        | 0 | 0        | 0 | 0 | 0        | 0.001216 | 0        |
| 0 | 0        | 0 | 0        | 0 | 0 | 0        | 0.001972 | 0        |
| 0 | 0        | 0 | 0.000263 | 0 | 0 | 0        | 0.00286  | 3.29E-05 |
| 0 | 0        | 0 | 0        | 0 | 0 | 0        | 0.007397 | 0        |
| 0 | 0        | 0 | 0        | 0 | 0 | 0        | 0.000756 | 0        |
| 0 | 0        | 0 | 0        | 0 | 0 | 3.29E-05 | 0.000394 | 0        |
| 0 | 0        | 0 | 0        | 0 | 0 | 0        | 0.000197 | 0        |
| 0 | 0        | 0 | 0        | 0 | 0 | 0        | 0.000822 | 0        |
| 0 | 0        | 0 | 0        | 0 | 0 | 0        | 0.00023  | 0        |
| 0 | 0        | 0 | 0        | 0 | 0 | 0        | 0.002729 | 0        |
| 0 | 0        | 0 | 0        | 0 | 0 | 0        | 0.002038 | 0        |
| 0 | 0        | 0 | 0        | 0 | 0 | 0        | 0.001446 | 0        |
| 0 | 0        | 0 | 0        | 0 | 0 | 0        | 0.000953 | 0        |
| 0 | 0        | 0 | 0        | 0 | 0 | 3.29E-05 | 0.00194  | 0        |
| 0 | 0        | 0 | 0        | 0 | 0 | 0        | 0.000953 | 0        |
| 0 | 0        | 0 | 0        | 0 | 0 | 0        | 0.000625 | 0        |
| 0 | 0        | 0 | 0        | 0 | 0 | 0        | 0.001841 | 0        |
| 0 | 0        | 0 | 9.86E-05 | 0 | 0 | 3.29E-05 | 0.013774 | 3.29E-05 |
| 0 | 0        | 0 | 0.000296 | 0 | 0 | 0        | 0.009599 | 0        |
| 0 | 0        | 0 | 0.000131 | 0 | 0 | 0        | 6.57E-05 | 0        |
| 0 | 0        | 0 | 0.000131 | 0 | 0 | 0        | 0.000197 | 0        |
| 0 | 0        | 0 | 0.000427 | 0 | 0 | 3.29E-05 | 0        | 0        |
| 0 | 6.57E-05 | 0 | 0.000131 | 0 | 0 | 0        | 0        | 0        |
| 0 | 0        | 0 | 0        | 0 | 0 | 0        | 0        | 0        |
| 0 | 0        | 0 | 3.29E-05 | 0 | 0 | 0        | 0        | 0        |
| 0 | 0        | 0 | 0.000756 | 0 | 0 | 0        | 0        | 0        |
| 0 | 0        | 0 | 6.57E-05 | 0 | 0 | 0        | 0        | 0        |
| 0 | 0        | 0 | 0        | 0 | 0 | 0        | 0.007824 | 6.57E-05 |
| 0 | 0        | 0 | 0.000526 | 0 | 0 | 0        | 0.001578 | 0        |
| 0 | 0        | 0 | 0        | 0 | 0 | 0        | 0.004307 | 0        |
| 0 | 0        | 0 | 0.000164 | 0 | 0 | 0        | 0.006706 | 3.29E-05 |
| 0 | 0        | 0 | 0.000164 | 0 | 0 | 0        | 0.005457 | 3.29E-05 |
| 0 | 0        | 0 | 6.57E-05 | 0 | 0 | 0        | 0.013413 | 0        |
| 0 | 0        | 0 | 0        | 0 | 0 | 0        | 0.006509 | 0        |
| 0 | 0        | 0 | 0        | 0 | 0 | 0        | 0.009238 | 0        |
| 0 | 0        | 0 | 6.57E-05 | 0 | 0 | 0        | 0.008021 | 0        |
| 0 | 0        | 0 | 0        | 0 | 0 | 0        | 0.005621 | 0        |
| 0 | 0        | 0 | 0        | 0 | 0 | 0        | 0.001348 | 0        |
| 0 | 0        | 0 | 0        | 0 | 0 | 0        | 0.000986 | 0        |





| k_Bacteri |
|-----------|-----------|-----------|-----------|-----------|-----------|-----------|-----------|-----------|
| 0         | 0         | 0         | 0         | 0         | 0         | 0         | 0.003156  | 0         |
| 0         | 0         | 0         | 0         | 0         | 0         | 0         | 0.000855  | 0         |
| 0         | 0         | 0         | 0         | 0         | 3.29E-05  | 0         | 0.002597  | 0         |
| 0         | 0         | 0         | 0         | 0         | 0         | 0         | 0.000362  | 0         |
| 0         | 0         | 0         | 0         | 0         | 0         | 0         | 0.001085  | 0         |
| 0         | 0         | 0         | 0         | 0         | 0         | 0         | 0.000296  | 0         |
| 0         | 0         | 0         | 0         | 0         | 0         | 0         | 0.001118  | 0         |
| 0         | 0         | 0         | 0         | 0         | 0         | 0         | 0.000164  | 0         |
| 0         | 0         | 0         | 0         | 0         | 0         | 0         | 0.0024    | 0         |
| 0         | 0         | 0         | 0         | 0         | 0         | 0         | 0.000855  | 0         |
| 0         | 0         | 0         | 0         | 0         | 0         | 0         | 0.00023   | 0         |
| 0         | 0         | 0         | 0         | 0         | 0         | 0         | 0.000164  | 0         |
| 3.29E-05  | 0         | 0         | 0         | 0         | 0         | 0         | 0.002071  | 0         |
| 0         | 0         | 0         | 0         | 0         | 0         | 0         | 0         | 0         |
| 0         | 0         | 0         | 0         | 0         | 0         | 0         | 0.000164  | 0         |
| 0         | 0         | 0         | 0         | 0         | 0         | 0         | 6.57E-05  | 0         |
| 0         | 0         | 0         | 0         | 0         | 0         | 0         | 0         | 0         |
| 0         | 0         | 0         | 0         | 0         | 0         | 0         | 0.000164  | 0         |
| 0         | 0         | 0         | 0         | 0         | 0         | 0         | 0         | 0         |
| 0         | 0         | 0         | 0         | 0         | 0         | 0         | 3.29E-05  | 0         |
| 0         | 0         | 0         | 0         | 0         | 0         | 0         | 0.002761  | 0         |
| 0         | 0         | 0         | 0         | 0         | 0         | 0         | 0.003682  | 0         |
| 0         | 0         | 0         | 0         | 0         | 0         | 0         | 0.002531  | 0         |
| 0         | 0         | 0         | 0         | 0         | 0         | 0         | 0.004668  | 0         |
| 0         | 0         | 0         | 0         | 0         | 0         | 0         | 0.014037  | 0         |
| 0         | 0         | 0         | 0         | 0         | 0         | 0         | 0.000986  | 0         |
| 0         | 0         | 0         | 0         | 0         | 0         | 0         | 0.01098   | 0         |
| 0         | 0         | 0         | 0         | 0         | 0         | 0         | 0.016207  | 0         |
| 0         | 0         | 0         | 0         | 0         | 0         | 0         | 0.003846  | 0         |
| 0         | 0         | 0         | 0         | 0         | 0         | 0         | 0.000427  | 0         |
| 0         | 0         | 0         | 0         | 0         | 0         | 0         | 0.00572   | 0         |
| 0         | 0         | 0         | 0         | 0         | 0         | 0         | 0.000394  | 0         |
| 0         | 0         | 0         | 0         | 0         | 0         | 0         | 0.010355  | 0         |
| 0         | 0         | 0         | 0         | 0         | 0         | 0         | 0.002104  | 0         |
| 0         | 0         | 0         | 0         | 0         | 0         | 0         | 0.005556  | 0         |
| 0         | 0         | 0         | 0         | 0         | 0         | 0         | 0.003222  | 0         |
| 0         | 0         | 0         | 0         | 0         | 0         | 0         | 0.003189  | 0         |
| 0         | 0         | 0         | 0.00023   | 0         | 0         | 0         | 0.003123  | 0         |
| 0         | 0         | 0         | 0         | 0         | 0         | 0         | 0.002433  | 0         |
| 0         | 0         | 0         | 0         | 0         | 0         | 0         | 0.003748  | 0         |
| 0         | 0         | 0         | 0         | 0         | 0         | 0         | 0.001677  | 0         |
| 0         | 0         | 0         | 0         | 0         | 0         | 0         | 0.002498  | 0         |
| 0         | 0         | 0         | 0         | 0         | 0         | 0         | 0.003781  | 0         |
| 0         | 0         | 0         | 0         | 0         | 0         | 0         | 3.29E-05  | 0         |

|          |          |   |          |   |          |          |          |   |
|----------|----------|---|----------|---|----------|----------|----------|---|
| 0        | 0        | 0 | 0        | 0 | 0        | 0        | 0.00549  | 0 |
| 0        | 0        | 0 | 3.29E-05 | 0 | 0        | 0        | 0.001381 | 0 |
| 0        | 0        | 0 | 0        | 0 | 0        | 0        | 0.000822 | 0 |
| 0        | 0        | 0 | 3.29E-05 | 0 | 0        | 0        | 0.001479 | 0 |
| 0        | 0        | 0 | 0        | 0 | 0        | 0        | 0.001874 | 0 |
| 0        | 0        | 0 | 3.29E-05 | 0 | 0        | 0        | 0.000362 | 0 |
| 0        | 0        | 0 | 0        | 0 | 0        | 0        | 0.000362 | 0 |
| 0        | 0        | 0 | 0        | 0 | 0        | 0        | 0.000855 | 0 |
| 0        | 0        | 0 | 0        | 0 | 0        | 0        | 0.004438 | 0 |
| 0        | 0        | 0 | 0        | 0 | 0        | 0        | 0.004833 | 0 |
| 0        | 0        | 0 | 0        | 0 | 0        | 0        | 0.00355  | 0 |
| 0        | 0        | 0 | 0        | 0 | 0        | 0        | 0.002005 | 0 |
| 0        | 0        | 0 | 0        | 0 | 0        | 0        | 0.002729 | 0 |
| 0        | 0        | 0 | 0        | 0 | 0        | 0        | 0.004833 | 0 |
| 0        | 0        | 0 | 3.29E-05 | 0 | 0        | 0        | 0.005753 | 0 |
| 0        | 0        | 0 | 0.00743  | 0 | 0        | 0        | 0.003649 | 0 |
| 0        | 0        | 0 | 0        | 0 | 0        | 0        | 0.008712 | 0 |
| 0        | 0        | 0 | 0        | 0 | 0        | 0        | 0.001151 | 0 |
| 0        | 0        | 0 | 0        | 0 | 0        | 0        | 0.00092  | 0 |
| 0        | 0        | 0 | 0        | 0 | 0        | 0        | 0.005687 | 0 |
| 0        | 0        | 0 | 0        | 0 | 0        | 0        | 0.000394 | 0 |
| 0        | 0        | 0 | 0        | 0 | 0        | 0        | 0.000592 | 0 |
| 0        | 0        | 0 | 0        | 0 | 0        | 0        | 0.0048   | 0 |
| 0        | 0        | 0 | 0        | 0 | 0        | 0        | 0.001118 | 0 |
| 0        | 0        | 0 | 0.000427 | 0 | 0        | 0        | 0.000723 | 0 |
| 0        | 0        | 0 | 0        | 0 | 0        | 0        | 0.00023  | 0 |
| 0        | 0        | 0 | 0        | 0 | 0        | 0        | 0.002433 | 0 |
| 0        | 0        | 0 | 0        | 0 | 0        | 0        | 0        | 0 |
| 0        | 0        | 0 | 0.000263 | 0 | 0        | 0        | 0.001677 | 0 |
| 0        | 0        | 0 | 0        | 0 | 0        | 0        | 0.001315 | 0 |
| 0        | 0        | 0 | 0        | 0 | 0        | 0        | 0.008416 | 0 |
| 0        | 0        | 0 | 0        | 0 | 0        | 6.57E-05 | 0.005983 | 0 |
| 0        | 3.29E-05 | 0 | 0        | 0 | 0        | 0        | 0.010158 | 0 |
| 3.29E-05 | 0        | 0 | 0        | 0 | 0        | 0        | 0.004109 | 0 |
| 0        | 0        | 0 | 0        | 0 | 0        | 0        | 0.012788 | 0 |
| 0        | 0        | 0 | 0        | 0 | 3.29E-05 | 0        | 0.006147 | 0 |
| 9.86E-05 | 0        | 0 | 0.000625 | 0 | 0        | 0        | 0.003057 | 0 |
| 3.29E-05 | 0        | 0 | 0        | 0 | 0        | 0        | 0.000427 | 0 |
| 0        | 0        | 0 | 0.001709 | 0 | 0        | 0        | 0.003583 | 0 |
| 0        | 0        | 0 | 0.001019 | 0 | 0        | 0        | 0.002005 | 0 |
| 0        | 0        | 0 | 0        | 0 | 0        | 0        | 0.036162 | 0 |
| 0        | 0        | 0 | 0        | 0 | 3.29E-05 | 0        | 0.015484 | 0 |
| 0        | 0        | 0 | 0        | 0 | 0        | 0        | 0.011013 | 0 |
| 3.29E-05 | 0        | 0 | 0        | 0 | 0        | 3.29E-05 | 0        | 0 |
| 0.001315 | 0        | 0 | 0        | 0 | 0        | 0        | 0        | 0 |
| 0        | 0        | 0 | 0.002696 | 0 | 0        | 0        | 0.00457  | 0 |
| 0        | 0        | 0 | 0        | 0 | 0        | 0        | 0.000723 | 0 |

|          |          |   |          |   |          |   |          |   |
|----------|----------|---|----------|---|----------|---|----------|---|
| 0        | 0        | 0 | 0        | 0 | 0        | 0 | 0.002696 | 0 |
| 0        | 0        | 0 | 0        | 0 | 0        | 0 | 0.003945 | 0 |
| 0        | 0        | 0 | 0        | 0 | 0        | 0 | 0.002203 | 0 |
| 0        | 0        | 0 | 0        | 0 | 0        | 0 | 0.003781 | 0 |
| 0        | 0        | 0 | 0        | 0 | 0        | 0 | 0.001019 | 0 |
| 0        | 0        | 0 | 0        | 0 | 0        | 0 | 0.001874 | 0 |
| 0        | 0        | 0 | 0        | 0 | 0        | 0 | 0.000296 | 0 |
| 0        | 0        | 0 | 0        | 0 | 0        | 0 | 0.00069  | 0 |
| 0        | 0        | 0 | 0        | 0 | 0        | 0 | 0.000526 | 0 |
| 0        | 0        | 0 | 0        | 0 | 0        | 0 | 0.004997 | 0 |
| 0        | 0        | 0 | 0        | 0 | 3.29E-05 | 0 | 0.015451 | 0 |
| 0        | 0        | 0 | 0        | 0 | 0        | 0 | 0.008251 | 0 |
| 0        | 0        | 0 | 0        | 0 | 0        | 0 | 0.005057 | 0 |
| 0        | 0        | 0 | 0        | 0 | 0        | 0 | 0.003156 | 0 |
| 0        | 0        | 0 | 0        | 0 | 0        | 0 | 0.000263 | 0 |
| 0        | 0        | 0 | 0        | 0 | 0        | 0 | 0.000329 | 0 |
| 0        | 0        | 0 | 0        | 0 | 0        | 0 | 0.000263 | 0 |
| 0        | 0        | 0 | 0        | 0 | 0        | 0 | 0.001183 | 0 |
| 0        | 0        | 0 | 0        | 0 | 0        | 0 | 0.000164 | 0 |
| 0        | 0        | 0 | 0        | 0 | 0        | 0 | 0.000362 | 0 |
| 0        | 0        | 0 | 0        | 0 | 0        | 0 | 0.001348 | 0 |
| 0        | 0        | 0 | 0        | 0 | 0        | 0 | 0.004471 | 0 |
| 0        | 0        | 0 | 0        | 0 | 0        | 0 | 0.000986 | 0 |
| 0        | 0        | 0 | 0        | 0 | 0        | 0 | 0.015714 | 0 |
| 0        | 0        | 0 | 0        | 0 | 0        | 0 | 0.005852 | 0 |
| 0        | 0        | 0 | 0        | 0 | 0        | 0 | 0.009829 | 0 |
| 0        | 0        | 0 | 0        | 0 | 0        | 0 | 0.001578 | 0 |
| 0        | 0        | 0 | 0        | 0 | 0        | 0 | 0.00332  | 0 |
| 0        | 0        | 0 | 0        | 0 | 0        | 0 | 0.000131 | 0 |
| 0        | 0        | 0 | 0        | 0 | 0        | 0 | 0.000855 | 0 |
| 0        | 0        | 0 | 0        | 0 | 0        | 0 | 0.000362 | 0 |
| 0        | 0        | 0 | 0        | 0 | 0        | 0 | 0.007035 | 0 |
| 0        | 0        | 0 | 0        | 0 | 0        | 0 | 0.010914 | 0 |
| 0        | 0        | 0 | 0        | 0 | 0        | 0 | 0.00503  | 0 |
| 0        | 3.29E-05 | 0 | 0.000164 | 0 | 0        | 0 | 0.009994 | 0 |
| 0        | 0        | 0 | 0        | 0 | 0        | 0 | 0.001775 | 0 |
| 0        | 0        | 0 | 0        | 0 | 0        | 0 | 0.000394 | 0 |
| 0        | 0        | 0 | 0        | 0 | 0        | 0 | 0.00023  | 0 |
| 0        | 0        | 0 | 0        | 0 | 0        | 0 | 0.008909 | 0 |
| 0        | 0        | 0 | 0.000427 | 0 | 0        | 0 | 0.0024   | 0 |
| 0        | 0        | 0 | 3.29E-05 | 0 | 0        | 0 | 0.007232 | 0 |
| 3.29E-05 | 0        | 0 | 0        | 0 | 0        | 0 | 0.00743  | 0 |
| 3.29E-05 | 0        | 0 | 0        | 0 | 0        | 0 | 0.008021 | 0 |
| 0        | 0        | 0 | 0        | 0 | 0        | 0 | 0.003649 | 0 |
| 0        | 0        | 0 | 0        | 0 | 0        | 0 | 0.00789  | 0 |
| 0        | 0        | 0 | 0        | 0 | 0        | 0 | 0.00618  | 0 |
| 0        | 0        | 0 | 0        | 0 | 0        | 0 | 0.005391 | 0 |



|          |   |          |          |   |   |          |          |   |
|----------|---|----------|----------|---|---|----------|----------|---|
| 0        | 0 | 0        | 0.000296 | 0 | 0 | 0        | 6.57E-05 | 0 |
| 0        | 0 | 0        | 0        | 0 | 0 | 0        | 0        | 0 |
| 0        | 0 | 0        | 0        | 0 | 0 | 6.57E-05 | 0.002433 | 0 |
| 0        | 0 | 0        | 0        | 0 | 0 | 0        | 0.000362 | 0 |
| 0        | 0 | 0        | 0        | 0 | 0 | 0        | 6.57E-05 | 0 |
| 3.29E-05 | 0 | 0        | 0        | 0 | 0 | 0        | 0.002761 | 0 |
| 0        | 0 | 0        | 0        | 0 | 0 | 0        | 0.003846 | 0 |
| 0        | 0 | 0        | 0        | 0 | 0 | 0        | 0.005687 | 0 |
| 0        | 0 | 0        | 0        | 0 | 0 | 0        | 0.008942 | 0 |
| 0        | 0 | 0        | 0        | 0 | 0 | 0        | 0.004339 | 0 |
| 0        | 0 | 0        | 0        | 0 | 0 | 0        | 0.0024   | 0 |
| 0        | 0 | 0        | 0        | 0 | 0 | 0        | 0.008054 | 0 |
| 0        | 0 | 0        | 0        | 0 | 0 | 0        | 0.002696 | 0 |
| 0        | 0 | 0        | 0        | 0 | 0 | 0        | 0.001118 | 0 |
| 0        | 0 | 0        | 0        | 0 | 0 | 0        | 0.002038 | 0 |
| 3.29E-05 | 0 | 0        | 0        | 0 | 0 | 0        | 0.003485 | 0 |
| 0        | 0 | 0        | 0        | 0 | 0 | 0        | 0.003748 | 0 |
| 0        | 0 | 0        | 0        | 0 | 0 | 0        | 0.001348 | 0 |
| 0        | 0 | 0        | 0        | 0 | 0 | 0        | 0.007298 | 0 |
| 0        | 0 | 6.57E-05 | 0        | 0 | 0 | 0        | 0.005194 | 0 |
| 0        | 0 | 0        | 0        | 0 | 0 | 0        | 0.011605 | 0 |
| 0        | 0 | 0        | 0        | 0 | 0 | 0        | 0.015582 | 0 |
| 0        | 0 | 0        | 0        | 0 | 0 | 0        | 0.002334 | 0 |
| 0        | 0 | 0        | 0        | 0 | 0 | 0        | 0.000164 | 0 |
| 0        | 0 | 0        | 0        | 0 | 0 | 0        | 9.86E-05 | 0 |
| 0        | 0 | 0        | 0        | 0 | 0 | 0        | 0.002301 | 0 |
| 0        | 0 | 0        | 0        | 0 | 0 | 0        | 0.004471 | 0 |
| 0        | 0 | 0        | 0        | 0 | 0 | 0        | 0.001611 | 0 |
| 0        | 0 | 0        | 0        | 0 | 0 | 0        | 0.002794 | 0 |
| 0        | 0 | 0        | 0        | 0 | 0 | 0        | 0.000263 | 0 |
| 0        | 0 | 0        | 6.57E-05 | 0 | 0 | 0        | 0.005194 | 0 |
| 0        | 0 | 0        | 0        | 0 | 0 | 0        | 0.001019 | 0 |
| 0        | 0 | 0        | 0        | 0 | 0 | 0        | 9.86E-05 | 0 |
| 0        | 0 | 0        | 0        | 0 | 0 | 0        | 0.000723 | 0 |
| 0        | 0 | 0        | 0        | 0 | 0 | 0        | 0.002367 | 0 |
| 0        | 0 | 0        | 0        | 0 | 0 | 0        | 0.002301 | 0 |
| 0        | 0 | 0        | 0        | 0 | 0 | 0        | 0.004208 | 0 |
| 0        | 0 | 0        | 0        | 0 | 0 | 0        | 0.004142 | 0 |
| 0        | 0 | 0        | 0        | 0 | 0 | 0        | 0.003189 | 0 |
| 0        | 0 | 0        | 0        | 0 | 0 | 0        | 0.005852 | 0 |
| 0        | 0 | 0        | 0        | 0 | 0 | 0        | 0.00194  | 0 |
| 0        | 0 | 0        | 0        | 0 | 0 | 0        | 0.000493 | 0 |
| 3.29E-05 | 0 | 0        | 0        | 0 | 0 | 0        | 0.010322 | 0 |
| 0        | 0 | 0        | 0        | 0 | 0 | 0        | 0.009271 | 0 |
| 0        | 0 | 0        | 0        | 0 | 0 | 0        | 0.003715 | 0 |
| 0        | 0 | 0        | 0        | 0 | 0 | 0        | 0.003945 | 0 |
| 0        | 0 | 0        | 3.29E-05 | 0 | 0 | 3.29E-05 | 0.004602 | 0 |

|          |          |   |          |   |          |   |          |   |
|----------|----------|---|----------|---|----------|---|----------|---|
| 0        | 0        | 0 | 0        | 0 | 0        | 0 | 0.010783 | 0 |
| 0        | 0        | 0 | 0        | 0 | 0        | 0 | 0.001414 | 0 |
| 0        | 3.29E-05 | 0 | 0        | 0 | 3.29E-05 | 0 | 0.030376 | 0 |
| 0        | 0        | 0 | 0        | 0 | 0        | 0 | 0.000592 | 0 |
| 3.29E-05 | 0        | 0 | 0        | 0 | 0        | 0 | 0.002005 | 0 |
| 0        | 0        | 0 | 0        | 0 | 0        | 0 | 0.000789 | 0 |
| 0        | 0        | 0 | 0.000164 | 0 | 0        | 0 | 0.003813 | 0 |
| 0        | 0        | 0 | 0        | 0 | 0        | 0 | 0.001381 | 0 |
| 0        | 0        | 0 | 0        | 0 | 0        | 0 | 0.003156 | 0 |
| 0        | 0        | 0 | 0        | 0 | 0        | 0 | 0.00092  | 0 |
| 0        | 0        | 0 | 0        | 0 | 0        | 0 | 0.000329 | 0 |
| 0        | 0        | 0 | 0        | 0 | 0        | 0 | 0.001907 | 0 |
| 0        | 0        | 0 | 0        | 0 | 0        | 0 | 9.86E-05 | 0 |
| 0        | 0        | 0 | 0        | 0 | 0        | 0 | 0.000723 | 0 |
| 0        | 0        | 0 | 0        | 0 | 0        | 0 | 0.00766  | 0 |
| 0        | 0        | 0 | 0        | 0 | 0        | 0 | 0.002498 | 0 |
| 0        | 0        | 0 | 0        | 0 | 0        | 0 | 0.001512 | 0 |
| 0        | 0        | 0 | 0        | 0 | 0        | 0 | 0.002334 | 0 |
| 0        | 0        | 0 | 0        | 0 | 0        | 0 | 0.008547 | 0 |
| 0        | 0        | 0 | 0        | 0 | 0        | 0 | 0.003649 | 0 |
| 0        | 0        | 0 | 0        | 0 | 0        | 0 | 0.003518 | 0 |
| 0        | 0        | 0 | 0        | 0 | 0        | 0 | 0.000986 | 0 |
| 0        | 0        | 0 | 0        | 0 | 0        | 0 | 0.000131 | 0 |
| 0        | 0        | 0 | 0        | 0 | 0        | 0 | 0.00263  | 0 |
| 0        | 0        | 0 | 0        | 0 | 0        | 0 | 0.000263 | 0 |
| 0        | 0        | 0 | 0        | 0 | 0        | 0 | 0.000131 | 0 |
| 0        | 0        | 0 | 0        | 0 | 0        | 0 | 3.29E-05 | 0 |
| 0        | 0        | 0 | 0        | 0 | 0        | 0 | 3.29E-05 | 0 |
| 0        | 0        | 0 | 0        | 0 | 0        | 0 | 0.001578 | 0 |
| 0        | 0        | 0 | 0        | 0 | 0        | 0 | 3.29E-05 | 0 |
| 0        | 0        | 0 | 0        | 0 | 0        | 0 | 0        | 0 |
| 0        | 0        | 0 | 0        | 0 | 0        | 0 | 0        | 0 |
| 0        | 0        | 0 | 0.000263 | 0 | 0        | 0 | 0.001742 | 0 |
| 0        | 0        | 0 | 0        | 0 | 0        | 0 | 0.00194  | 0 |
| 0        | 0        | 0 | 0        | 0 | 0        | 0 | 0.010027 | 0 |
| 3.29E-05 | 0        | 0 | 0        | 0 | 0        | 0 | 0.008284 | 0 |
| 0        | 0        | 0 | 0        | 0 | 0        | 0 | 0.003649 | 0 |
| 0        | 0        | 0 | 0        | 0 | 0        | 0 | 0.00046  | 0 |
| 3.29E-05 | 0        | 0 | 9.86E-05 | 0 | 0        | 0 | 0.00263  | 0 |
| 0        | 0        | 0 | 0        | 0 | 0        | 0 | 0.003518 | 0 |
| 0        | 0        | 0 | 0        | 0 | 0        | 0 | 0.00572  | 0 |
| 0        | 0        | 0 | 0        | 0 | 0        | 0 | 0.006312 | 0 |
| 0        | 0        | 0 | 0        | 0 | 0        | 0 | 0.002696 | 0 |
| 3.29E-05 | 0        | 0 | 0        | 0 | 0        | 0 | 0.002827 | 0 |
| 3.29E-05 | 0        | 0 | 0        | 0 | 0        | 0 | 0.000625 | 0 |
| 0        | 0        | 0 | 0        | 0 | 0        | 0 | 0.00194  | 0 |
| 0        | 0        | 0 | 0        | 0 | 0        | 0 | 0.001545 | 0 |





|          |   |   |          |          |          |   |          |   |
|----------|---|---|----------|----------|----------|---|----------|---|
| 0        | 0 | 0 | 0        | 0        | 0        | 0 | 0.001479 | 0 |
| 0        | 0 | 0 | 0        | 0        | 0        | 0 | 0.00332  | 0 |
| 0        | 0 | 0 | 0        | 0        | 0        | 0 | 0.000592 | 0 |
| 0        | 0 | 0 | 0        | 0        | 0        | 0 | 0.01075  | 0 |
| 0        | 0 | 0 | 0        | 0        | 0        | 0 | 0.009369 | 0 |
| 9.86E-05 | 0 | 0 | 0        | 0        | 6.57E-05 | 0 | 0.009139 | 0 |
| 0        | 0 | 0 | 0        | 0        | 0        | 0 | 0.003287 | 0 |
| 0        | 0 | 0 | 0        | 0        | 0        | 0 | 0.003518 | 0 |
| 0        | 0 | 0 | 9.86E-05 | 0        | 0        | 0 | 0.005589 | 0 |
| 0        | 0 | 0 | 0.000197 | 0        | 0        | 0 | 0.004701 | 0 |
| 3.29E-05 | 0 | 0 | 0        | 0        | 0        | 0 | 0.007528 | 0 |
| 0        | 0 | 0 | 0        | 0        | 0        | 0 | 0.000164 | 0 |
| 0        | 0 | 0 | 0        | 0        | 0        | 0 | 0.0024   | 0 |
| 3.29E-05 | 0 | 0 | 0        | 0        | 0        | 0 | 0.015451 | 0 |
| 0        | 0 | 0 | 0        | 0        | 0        | 0 | 0.004931 | 0 |
| 0        | 0 | 0 | 0        | 0        | 0        | 0 | 0.000362 | 0 |
| 0        | 0 | 0 | 0        | 0        | 0        | 0 | 0.001578 | 0 |
| 0        | 0 | 0 | 0        | 0        | 0        | 0 | 0.001874 | 0 |
| 0        | 0 | 0 | 0        | 0        | 0        | 0 | 0.002564 | 0 |
| 3.29E-05 | 0 | 0 | 3.29E-05 | 0        | 0        | 0 | 0.017851 | 0 |
| 0        | 0 | 0 | 0        | 0        | 0        | 0 | 0.000493 | 0 |
| 0        | 0 | 0 | 0        | 0        | 3.29E-05 | 0 | 0.002564 | 0 |
| 0        | 0 | 0 | 0        | 0        | 0        | 0 | 0.001183 | 0 |
| 0        | 0 | 0 | 0        | 0        | 0        | 0 | 0.000625 | 0 |
| 0        | 0 | 0 | 0        | 0        | 0        | 0 | 0.000756 | 0 |
| 0        | 0 | 0 | 0        | 0        | 0        | 0 | 0.000329 | 0 |
| 0        | 0 | 0 | 0        | 0        | 0        | 0 | 0.001381 | 0 |
| 0        | 0 | 0 | 0        | 0        | 0        | 0 | 0.001118 | 0 |
| 0        | 0 | 0 | 0        | 0        | 0        | 0 | 0.002104 | 0 |
| 0        | 0 | 0 | 0.000329 | 0        | 0        | 0 | 0.000427 | 0 |
| 0        | 0 | 0 | 9.86E-05 | 0        | 0        | 0 | 0.000493 | 0 |
| 0        | 0 | 0 | 0        | 0        | 0        | 0 | 0.001019 | 0 |
| 3.29E-05 | 0 | 0 | 0.002663 | 0        | 0        | 0 | 0.000493 | 0 |
| 0        | 0 | 0 | 0        | 0        | 0        | 0 | 0.000164 | 0 |
| 0        | 0 | 0 | 0.000131 | 0        | 0        | 0 | 3.29E-05 | 0 |
| 0        | 0 | 0 | 0        | 0        | 0        | 0 | 3.29E-05 | 0 |
| 0        | 0 | 0 | 0        | 0        | 0        | 0 | 6.57E-05 | 0 |
| 0        | 0 | 0 | 0.000855 | 0        | 0        | 0 | 0.000493 | 0 |
| 0        | 0 | 0 | 0.000592 | 0        | 0        | 0 | 0.001348 | 0 |
| 0        | 0 | 0 | 0        | 0        | 0        | 0 | 0.002235 | 0 |
| 0        | 0 | 0 | 0        | 0        | 0        | 0 | 0.002729 | 0 |
| 0        | 0 | 0 | 0        | 0        | 0        | 0 | 0.008087 | 0 |
| 0        | 0 | 0 | 0.000986 | 0        | 0        | 0 | 0.002137 | 0 |
| 0        | 0 | 0 | 0        | 0        | 0        | 0 | 0.000362 | 0 |
| 0        | 0 | 0 | 0.000362 | 0        | 0        | 0 | 0.000756 | 0 |
| 0        | 0 | 0 | 0        | 0.000888 | 0        | 0 | 0.005687 | 0 |
| 0        | 0 | 0 | 0        | 0        | 0        | 0 | 0.00046  | 0 |

|          |   |          |          |   |   |   |          |   |
|----------|---|----------|----------|---|---|---|----------|---|
| 0        | 0 | 0        | 0        | 0 | 0 | 0 | 0.000592 | 0 |
| 0        | 0 | 0        | 0        | 0 | 0 | 0 | 0.004602 | 0 |
| 0        | 0 | 0        | 0        | 0 | 0 | 0 | 0.000625 | 0 |
| 0        | 0 | 0        | 0        | 0 | 0 | 0 | 0        | 0 |
| 0        | 0 | 0        | 0        | 0 | 0 | 0 | 0        | 0 |
| 0        | 0 | 0        | 0        | 0 | 0 | 0 | 0        | 0 |
| 0        | 0 | 0        | 0        | 0 | 0 | 0 | 0        | 0 |
| 0        | 0 | 0        | 3.29E-05 | 0 | 0 | 0 | 0        | 0 |
| 0        | 0 | 0        | 0        | 0 | 0 | 0 | 0        | 0 |
| 0        | 0 | 0        | 0        | 0 | 0 | 0 | 0.000131 | 0 |
| 0        | 0 | 0        | 0        | 0 | 0 | 0 | 0.000362 | 0 |
| 0        | 0 | 0        | 0        | 0 | 0 | 0 | 0.000394 | 0 |
| 0        | 0 | 0        | 0        | 0 | 0 | 0 | 3.29E-05 | 0 |
| 0        | 0 | 0        | 0        | 0 | 0 | 0 | 0.001052 | 0 |
| 0        | 0 | 0        | 0        | 0 | 0 | 0 | 0.000263 | 0 |
| 0        | 0 | 0        | 0        | 0 | 0 | 0 | 3.29E-05 | 0 |
| 0        | 0 | 0        | 0        | 0 | 0 | 0 | 0.016273 | 0 |
| 0        | 0 | 0        | 0        | 0 | 0 | 0 | 0.009106 | 0 |
| 0        | 0 | 0        | 0        | 0 | 0 | 0 | 0.00457  | 0 |
| 0        | 0 | 0        | 0        | 0 | 0 | 0 | 0.01075  | 0 |
| 0        | 0 | 0        | 0        | 0 | 0 | 0 | 0.008416 | 0 |
| 0        | 0 | 0        | 0        | 0 | 0 | 0 | 0.005884 | 0 |
| 0        | 0 | 0        | 0        | 0 | 0 | 0 | 0.002531 | 0 |
| 0        | 0 | 0        | 0        | 0 | 0 | 0 | 0.002761 | 0 |
| 0        | 0 | 0        | 0        | 0 | 0 | 0 | 0.001282 | 0 |
| 0        | 0 | 0        | 0        | 0 | 0 | 0 | 0.001052 | 0 |
| 0        | 0 | 0        | 0        | 0 | 0 | 0 | 0.001742 | 0 |
| 0        | 0 | 0        | 0        | 0 | 0 | 0 | 0.000526 | 0 |
| 0        | 0 | 0        | 3.29E-05 | 0 | 0 | 0 | 0.004537 | 0 |
| 0        | 0 | 0        | 0        | 0 | 0 | 0 | 0.002992 | 0 |
| 0        | 0 | 0        | 0        | 0 | 0 | 0 | 0.000427 | 0 |
| 0        | 0 | 0        | 0        | 0 | 0 | 0 | 0.001709 | 0 |
| 0        | 0 | 0        | 0        | 0 | 0 | 0 | 9.86E-05 | 0 |
| 0        | 0 | 0        | 0        | 0 | 0 | 0 | 0.000822 | 0 |
| 0        | 0 | 0        | 0        | 0 | 0 | 0 | 0.005128 | 0 |
| 0        | 0 | 0        | 0        | 0 | 0 | 0 | 0.002235 | 0 |
| 0        | 0 | 3.29E-05 | 0        | 0 | 0 | 0 | 0.000362 | 0 |
| 0        | 0 | 0        | 0        | 0 | 0 | 0 | 0.000296 | 0 |
| 0        | 0 | 0        | 0        | 0 | 0 | 0 | 0.000559 | 0 |
| 0        | 0 | 0        | 0        | 0 | 0 | 0 | 0.001151 | 0 |
| 0        | 0 | 0        | 0        | 0 | 0 | 0 | 0.000197 | 0 |
| 3.29E-05 | 0 | 0        | 0        | 0 | 0 | 0 | 0.001446 | 0 |
| 0        | 0 | 0        | 0        | 0 | 0 | 0 | 0.007134 | 0 |
| 0        | 0 | 0        | 0        | 0 | 0 | 0 | 0.001315 | 0 |
| 0        | 0 | 0        | 0        | 0 | 0 | 0 | 0.000789 | 0 |
| 0        | 0 | 0        | 0        | 0 | 0 | 0 | 0.004833 | 0 |

|          |          |   |          |          |          |   |          |   |
|----------|----------|---|----------|----------|----------|---|----------|---|
| 0        | 0        | 0 | 0        | 0        | 0        | 0 | 0.002531 | 0 |
| 0        | 0        | 0 | 0        | 0        | 0        | 0 | 0.00835  | 0 |
| 0        | 0        | 0 | 0        | 0        | 0        | 0 | 0.000164 | 0 |
| 0        | 0        | 0 | 0        | 0        | 3.29E-05 | 0 | 0.039778 | 0 |
| 0        | 0        | 0 | 0        | 0        | 0        | 0 | 0.003813 | 0 |
| 0        | 0        | 0 | 0        | 0        | 0        | 0 | 0.001282 | 0 |
| 3.29E-05 | 0        | 0 | 6.57E-05 | 0        | 0        | 0 | 0.000986 | 0 |
| 0        | 0        | 0 | 0        | 0        | 0        | 0 | 3.29E-05 | 0 |
| 0        | 0        | 0 | 9.86E-05 | 0        | 0        | 0 | 0.000362 | 0 |
| 0        | 0        | 0 | 0        | 0        | 0        | 0 | 0.000131 | 0 |
| 0        | 0        | 0 | 0        | 0        | 0        | 0 | 0.000263 | 0 |
| 6.57E-05 | 0        | 0 | 0        | 0        | 0        | 0 | 0.001151 | 0 |
| 0        | 0        | 0 | 0        | 0        | 0        | 0 | 0.004044 | 0 |
| 0        | 0        | 0 | 0        | 6.57E-05 | 0        | 0 | 0.002729 | 0 |
| 0        | 0        | 0 | 0        | 0        | 0        | 0 | 0.004109 | 0 |
| 0        | 0        | 0 | 0        | 0        | 0        | 0 | 0.001348 | 0 |
| 0        | 0        | 0 | 3.29E-05 | 0        | 0        | 0 | 0.003649 | 0 |
| 0        | 0        | 0 | 0        | 0        | 0        | 0 | 0.003846 | 0 |
| 0        | 0        | 0 | 0        | 0        | 0        | 0 | 0.004833 | 0 |
| 0        | 0        | 0 | 0        | 0        | 0        | 0 | 0.000592 | 0 |
| 0        | 3.29E-05 | 0 | 0        | 0        | 0        | 0 | 0.001479 | 0 |
| 0        | 0        | 0 | 0        | 0        | 0        | 0 | 0.004011 | 0 |
| 0        | 0        | 0 | 0        | 0        | 0        | 0 | 0.002071 | 0 |
| 0        | 0        | 0 | 0        | 0        | 0        | 0 | 0.012755 | 0 |
| 0        | 0        | 0 | 0        | 0        | 0        | 0 | 0.010158 | 0 |
| 0        | 0        | 0 | 0        | 0        | 0        | 0 | 0.000986 | 0 |
| 0        | 0        | 0 | 0        | 0        | 0        | 0 | 0.002268 | 0 |
| 0        | 0        | 0 | 0        | 0        | 0        | 0 | 0.000888 | 0 |
| 0        | 0        | 0 | 0        | 0        | 0        | 0 | 0.00023  | 0 |
| 0        | 0        | 0 | 0        | 0        | 0        | 0 | 0.000625 | 0 |
| 0        | 0        | 0 | 0        | 0        | 0        | 0 | 0.001644 | 0 |
| 0        | 0        | 0 | 0        | 0        | 0        | 0 | 0.003682 | 0 |
| 0        | 0        | 0 | 0        | 0        | 0        | 0 | 0.00194  | 0 |
| 0        | 0        | 0 | 0        | 0        | 0        | 0 | 0.000888 | 0 |
| 3.29E-05 | 0        | 0 | 0        | 0        | 0        | 0 | 0.004339 | 0 |
| 0        | 0        | 0 | 0        | 0        | 0        | 0 | 0.002992 | 0 |
| 0        | 0        | 0 | 0        | 0        | 0        | 0 | 6.57E-05 | 0 |
| 0        | 0        | 0 | 0        | 0        | 0        | 0 | 0        | 0 |
| 0        | 0        | 0 | 0        | 0        | 0        | 0 | 0.000164 | 0 |
| 3.29E-05 | 0        | 0 | 0        | 0        | 0        | 0 | 3.29E-05 | 0 |
| 0        | 0        | 0 | 0.000131 | 0        | 0        | 0 | 0.001874 | 0 |
| 0        | 0        | 0 | 0        | 0        | 0        | 0 | 6.57E-05 | 0 |
| 0        | 0        | 0 | 0        | 0        | 0        | 0 | 6.57E-05 | 0 |
| 0        | 0        | 0 | 0        | 0        | 0        | 0 | 6.57E-05 | 0 |
| 0        | 0        | 0 | 0        | 0        | 0        | 0 | 0        | 0 |
| 0        | 0        | 0 | 0        | 0        | 0        | 0 | 0.002334 | 0 |
| 0        | 0        | 0 | 0        | 0        | 0        | 0 | 0.001414 | 0 |

|          |   |   |          |          |          |   |          |   |
|----------|---|---|----------|----------|----------|---|----------|---|
| 0        | 0 | 0 | 0        | 0        | 0        | 0 | 0.00309  | 0 |
| 0        | 0 | 0 | 0        | 0        | 0        | 0 | 0.001151 | 0 |
| 0        | 0 | 0 | 0        | 0        | 0        | 0 | 0.001709 | 0 |
| 0        | 0 | 0 | 0        | 0        | 0        | 0 | 0        | 0 |
| 0        | 0 | 0 | 0        | 0        | 0        | 0 | 0.001348 | 0 |
| 0        | 0 | 0 | 0        | 0        | 0        | 0 | 0.001644 | 0 |
| 0        | 0 | 0 | 0        | 0        | 3.29E-05 | 0 | 0.004044 | 0 |
| 0        | 0 | 0 | 0        | 0.000164 | 0        | 0 | 0.002761 | 0 |
| 0        | 0 | 0 | 0        | 0        | 0        | 0 | 0.002466 | 0 |
| 0        | 0 | 0 | 0        | 0        | 0        | 0 | 0.003682 | 0 |
| 0        | 0 | 0 | 0        | 0        | 0        | 0 | 0.00641  | 0 |
| 0        | 0 | 0 | 0        | 0        | 0        | 0 | 0.008251 | 0 |
| 0        | 0 | 0 | 0        | 0        | 0        | 0 | 0.001414 | 0 |
| 0        | 0 | 0 | 0        | 0        | 0        | 0 | 0.002301 | 0 |
| 0        | 0 | 0 | 0        | 0        | 0        | 0 | 0.000296 | 0 |
| 0        | 0 | 0 | 0        | 0        | 0        | 0 | 0.001545 | 0 |
| 0        | 0 | 0 | 0        | 0        | 0        | 0 | 3.29E-05 | 0 |
| 0        | 0 | 0 | 3.29E-05 | 0        | 0        | 0 | 0        | 0 |
| 0        | 0 | 0 | 0        | 0        | 0        | 0 | 0        | 0 |
| 0        | 0 | 0 | 0        | 0        | 0        | 0 | 0.000131 | 0 |
| 0        | 0 | 0 | 0        | 0        | 0        | 0 | 0.000197 | 0 |
| 0        | 0 | 0 | 0        | 0        | 0        | 0 | 0.000362 | 0 |
| 0        | 0 | 0 | 0        | 0        | 0        | 0 | 9.86E-05 | 0 |
| 0        | 0 | 0 | 0.000493 | 0        | 0        | 0 | 6.57E-05 | 0 |
| 0        | 0 | 0 | 0        | 0        | 0        | 0 | 0.002564 | 0 |
| 0        | 0 | 0 | 0        | 0        | 0        | 0 | 0.001841 | 0 |
| 0        | 0 | 0 | 6.57E-05 | 0        | 0        | 0 | 0.023571 | 0 |
| 0        | 0 | 0 | 0        | 0        | 0        | 0 | 0.004076 | 0 |
| 0        | 0 | 0 | 0        | 6.57E-05 | 0        | 0 | 0.004833 | 0 |
| 3.29E-05 | 0 | 0 | 0        | 0        | 3.29E-05 | 0 | 0.00858  | 0 |
| 0        | 0 | 0 | 0        | 0        | 0        | 0 | 0.003452 | 0 |
| 0        | 0 | 0 | 0        | 0        | 0        | 0 | 0.007002 | 0 |
| 0        | 0 | 0 | 0        | 0        | 0        | 0 | 0.002235 | 0 |
| 0        | 0 | 0 | 0        | 0        | 0        | 0 | 0.0048   | 0 |
| 0        | 0 | 0 | 6.57E-05 | 0        | 0        | 0 | 0.002498 | 0 |
| 0        | 0 | 0 | 0        | 0        | 0        | 0 | 0.001118 | 0 |
| 0        | 0 | 0 | 0        | 0        | 0        | 0 | 3.29E-05 | 0 |
| 0        | 0 | 0 | 0        | 0        | 0        | 0 | 0.001085 | 0 |
| 0        | 0 | 0 | 0        | 0        | 0        | 0 | 0.005063 | 0 |
| 3.29E-05 | 0 | 0 | 0        | 0        | 0        | 0 | 0.007035 | 0 |
| 0        | 0 | 0 | 0        | 0        | 0        | 0 | 0.000329 | 0 |
| 0        | 0 | 0 | 0        | 0        | 0        | 0 | 0.001249 | 0 |
| 0        | 0 | 0 | 0.004044 | 0        | 0        | 0 | 0.000953 | 0 |
| 0        | 0 | 0 | 0        | 0        | 0        | 0 | 0.001775 | 0 |
| 0        | 0 | 0 | 0        | 0        | 0        | 0 | 0.001381 | 0 |
| 3.29E-05 | 0 | 0 | 0        | 0        | 0        | 0 | 0.000953 | 0 |
| 0        | 0 | 0 | 0        | 0        | 0        | 0 | 0.00503  | 0 |

|          |          |          |          |   |          |   |          |   |
|----------|----------|----------|----------|---|----------|---|----------|---|
| 0        | 0        | 0        | 0        | 0 | 0        | 0 | 0.00023  | 0 |
| 3.29E-05 | 0        | 0        | 0        | 0 | 0        | 0 | 0.002893 | 0 |
| 0        | 0        | 0        | 0        | 0 | 0        | 0 | 0.001972 | 0 |
| 0        | 0        | 0        | 0        | 0 | 0        | 0 | 0.001282 | 0 |
| 0        | 0        | 0        | 0        | 0 | 0        | 0 | 0.001578 | 0 |
| 0        | 0        | 0        | 0        | 0 | 0        | 0 | 0.002926 | 0 |
| 0        | 0        | 0        | 0        | 0 | 0        | 0 | 0.002959 | 0 |
| 0        | 0        | 0        | 0        | 0 | 0        | 0 | 0.001446 | 0 |
| 0        | 0        | 0        | 0        | 0 | 0        | 0 | 0.000756 | 0 |
| 0        | 3.29E-05 | 0        | 3.29E-05 | 0 | 0        | 0 | 0.001611 | 0 |
| 0        | 0        | 0        | 0.000164 | 0 | 0        | 0 | 0.005424 | 0 |
| 0        | 0        | 0        | 0        | 0 | 3.29E-05 | 0 | 0.010553 | 0 |
| 0        | 0        | 0        | 0        | 0 | 0        | 0 | 0.001118 | 0 |
| 0        | 0        | 0        | 0        | 0 | 0        | 0 | 0.000592 | 0 |
| 0        | 0        | 0        | 0        | 0 | 0        | 0 | 0.000394 | 0 |
| 0        | 0        | 0        | 0        | 0 | 0        | 0 | 0.000263 | 0 |
| 0        | 0        | 0        | 0        | 0 | 0        | 0 | 3.29E-05 | 0 |
| 0        | 0        | 0        | 0        | 0 | 0        | 0 | 0.001118 | 0 |
| 0        | 0        | 0        | 0        | 0 | 0        | 0 | 0.000559 | 0 |
| 0        | 3.29E-05 | 0        | 0        | 0 | 0        | 0 | 0.000362 | 0 |
| 0        | 0        | 0        | 0        | 0 | 0        | 0 | 0.000526 | 0 |
| 0        | 0        | 0        | 0        | 0 | 0        | 0 | 0.000394 | 0 |
| 0        | 0        | 0        | 0        | 0 | 0        | 0 | 0.000296 | 0 |
| 0        | 0        | 0        | 0        | 0 | 0        | 0 | 0.000362 | 0 |
| 0        | 0        | 0        | 0        | 0 | 0        | 0 | 0.001085 | 0 |
| 3.29E-05 | 0        | 0        | 0        | 0 | 0        | 0 | 6.57E-05 | 0 |
| 0        | 0        | 0        | 0        | 0 | 0        | 0 | 0.00023  | 0 |
| 0        | 0        | 0        | 0        | 0 | 0        | 0 | 0        | 0 |
| 0        | 0        | 0        | 0        | 0 | 0        | 0 | 3.29E-05 | 0 |
| 0        | 0        | 0        | 0        | 0 | 0        | 0 | 0        | 0 |
| 0        | 0        | 0        | 0        | 0 | 0        | 0 | 0        | 0 |
| 0        | 0        | 0        | 0        | 0 | 0        | 0 | 0        | 0 |
| 0        | 0        | 0        | 0        | 0 | 0        | 0 | 3.29E-05 | 0 |
| 3.29E-05 | 0        | 6.57E-05 | 0        | 0 | 0        | 0 | 0        | 0 |
| 0        | 0        | 0        | 0        | 0 | 0        | 0 | 0        | 0 |
| 0        | 0        | 0        | 0        | 0 | 0        | 0 | 0.001874 | 0 |
| 0        | 0        | 0        | 0        | 0 | 0        | 0 | 0.002038 | 0 |
| 0        | 0        | 0        | 0        | 0 | 3.29E-05 | 0 | 0.006476 | 0 |
| 0        | 0        | 0        | 0        | 0 | 0        | 0 | 0.001742 | 0 |
| 3.29E-05 | 0        | 0        | 3.29E-05 | 0 | 0        | 0 | 0.002959 | 0 |
| 0        | 0        | 0        | 0        | 0 | 0        | 0 | 0.006213 | 0 |
| 0        | 0        | 0        | 0        | 0 | 0        | 0 | 0.001841 | 0 |
| 0        | 0        | 0        | 0        | 0 | 0        | 0 | 0.005556 | 0 |
| 0        | 0        | 0        | 0        | 0 | 0        | 0 | 0.002926 | 0 |
| 0        | 0        | 0        | 0        | 0 | 0        | 0 | 0.00046  | 0 |
| 0        | 0        | 0        | 0        | 0 | 0        | 0 | 0.00023  | 0 |
| 0        | 0        | 0        | 0        | 0 | 0        | 0 | 0.000131 | 0 |

|          |   |          |          |   |          |   |          |   |
|----------|---|----------|----------|---|----------|---|----------|---|
| 0        | 0 | 0        | 0.000263 | 0 | 0        | 0 | 0.00194  | 0 |
| 0        | 0 | 0        | 0        | 0 | 0        | 0 | 0.004208 | 0 |
| 0        | 0 | 0        | 0        | 0 | 0        | 0 | 0.00309  | 0 |
| 0        | 0 | 0        | 0        | 0 | 0        | 0 | 0.005457 | 0 |
| 0        | 0 | 0        | 0        | 0 | 0        | 0 | 0.00069  | 0 |
| 0        | 0 | 0        | 0        | 0 | 0        | 0 | 0.00023  | 0 |
| 0        | 0 | 0        | 0.008613 | 0 | 0        | 0 | 3.29E-05 | 0 |
| 0        | 0 | 0        | 0        | 0 | 0        | 0 | 0.003386 | 0 |
| 0        | 0 | 0        | 0        | 0 | 0        | 0 | 0.000493 | 0 |
| 0        | 0 | 0        | 0.002235 | 0 | 0        | 0 | 0.002334 | 0 |
| 0        | 0 | 6.57E-05 | 0        | 0 | 0        | 0 | 0.000789 | 0 |
| 3.29E-05 | 0 | 0        | 6.57E-05 | 0 | 3.29E-05 | 0 | 0.016043 | 0 |
| 0        | 0 | 0        | 0        | 0 | 0        | 0 | 0.000131 | 0 |
| 0        | 0 | 0        | 6.57E-05 | 0 | 0        | 0 | 0.001085 | 0 |
| 0        | 0 | 0        | 0.000493 | 0 | 0        | 0 | 0.000526 | 0 |
| 0        | 0 | 0        | 0.000296 | 0 | 0        | 0 | 0.000953 | 0 |
| 0        | 0 | 0        | 0        | 0 | 0        | 0 | 0.000427 | 0 |
| 0        | 0 | 0        | 0        | 0 | 0        | 0 | 0.005063 | 0 |
| 0        | 0 | 0        | 0        | 0 | 0        | 0 | 0.000493 | 0 |
| 0        | 0 | 0        | 6.57E-05 | 0 | 0        | 0 | 0.000789 | 0 |
| 0        | 0 | 0        | 0.000526 | 0 | 0        | 0 | 0.000953 | 0 |
| 0        | 0 | 0        | 3.29E-05 | 0 | 0        | 0 | 0.006575 | 0 |
| 0        | 0 | 0        | 0        | 0 | 0        | 0 | 0.000986 | 0 |

| k_Bacteri |
|-----------|-----------|-----------|-----------|-----------|-----------|-----------|-----------|-----------|
| 0         | 0         | 6.57E-05  | 0         | 0         | 0         | 0.007923  | 0         | 0         |
| 0         | 0         | 0         | 0         | 0         | 0         | 0.006082  | 0         | 0         |
| 0         | 0         | 0         | 0         | 0         | 0         | 0.002597  | 0         | 0         |
| 0         | 0         | 0         | 0         | 0         | 0         | 0.001578  | 0         | 0         |
| 0         | 0         | 0         | 0         | 3.29E-05  | 0         | 0.00217   | 0         | 0         |
| 0         | 0         | 0         | 0         | 0         | 0         | 3.29E-05  | 0         | 0         |
| 0         | 0         | 0         | 0         | 0         | 0         | 0.004109  | 0         | 0         |
| 0         | 0         | 0         | 0         | 0         | 0         | 0.001052  | 0         | 0         |
| 0         | 0         | 0         | 0         | 0         | 0         | 0.001841  | 0         | 0         |
| 0         | 0         | 0         | 0         | 3.29E-05  | 0         | 0.008449  | 0         | 0         |
| 0         | 0         | 0         | 0         | 0         | 0         | 0.020513  | 0         | 0         |
| 0         | 0         | 0         | 0         | 0         | 0         | 0.000625  | 0         | 0         |
| 0         | 0         | 0.003616  | 0         | 3.29E-05  | 0         | 0.024491  | 0         | 0         |
| 0         | 0         | 0.000394  | 0         | 0         | 0         | 0.056609  | 0         | 0         |
| 0         | 0         | 3.29E-05  | 0         | 0         | 0         | 0.010914  | 0         | 0         |
| 0         | 0         | 0         | 0         | 0         | 0         | 0.008843  | 0         | 0         |
| 0         | 0         | 0         | 0         | 0         | 0         | 0.048226  | 0         | 0         |
| 0         | 0         | 0         | 0         | 0         | 0         | 9.86E-05  | 0         | 0         |
| 0         | 0         | 0         | 0         | 0         | 0         | 0.002466  | 0         | 0         |
| 0         | 0         | 9.86E-05  | 0         | 0         | 0         | 0.002071  | 0         | 0         |
| 0         | 0         | 3.29E-05  | 0         | 0         | 0         | 0.003616  | 0         | 0         |
| 0         | 0         | 0         | 0         | 3.29E-05  | 0         | 0.012657  | 0         | 0         |
| 0         | 0         | 0.000164  | 0         | 0         | 0         | 0.001151  | 0         | 0         |
| 0         | 0         | 0         | 0         | 3.29E-05  | 0         | 0         | 0         | 0         |
| 0         | 0         | 0         | 0         | 0         | 0         | 6.57E-05  | 0         | 0         |
| 0         | 0         | 0         | 0         | 0         | 0         | 0         | 0         | 0         |
| 0         | 0         | 6.57E-05  | 0         | 0         | 0         | 0.000493  | 0         | 0         |
| 0         | 0         | 3.29E-05  | 0         | 6.57E-05  | 0         | 0.002235  | 0         | 0         |
| 0         | 0         | 0         | 0         | 0         | 0         | 0.005424  | 0         | 0         |
| 0         | 0         | 0         | 0         | 3.29E-05  | 0         | 0.001414  | 0         | 0         |
| 0         | 0         | 0         | 0         | 0         | 0         | 0         | 0         | 0         |
| 0         | 0         | 0         | 0         | 0         | 0         | 0.000822  | 0         | 0         |
| 0         | 0         | 9.86E-05  | 0         | 9.86E-05  | 0         | 0.001052  | 0         | 0         |
| 0         | 0         | 0         | 0         | 0         | 0         | 0.001085  | 0         | 0         |
| 0         | 0         | 6.57E-05  | 0         | 3.29E-05  | 0         | 0.001019  | 0         | 0         |
| 0         | 0         | 0         | 0         | 0         | 0         | 3.29E-05  | 0         | 0         |
| 0         | 0         | 0         | 0         | 0         | 0         | 0.00217   | 0         | 0         |
| 0         | 0         | 0         | 0         | 0         | 0         | 0.00309   | 0         | 0         |
| 0         | 0         | 0         | 0         | 0         | 0         | 0.000263  | 0         | 0         |
| 0         | 0         | 0         | 0         | 0         | 0         | 0.000592  | 0         | 0         |
| 0         | 0         | 0         | 0         | 0         | 0         | 0.000197  | 0         | 0         |
| 0         | 0         | 0         | 0         | 0         | 0         | 0.000296  | 0         | 0         |
| 0         | 0         | 0         | 0         | 0         | 0         | 3.29E-05  | 0         | 0         |
| 0         | 0         | 0         | 0         | 0         | 0         | 0.000592  | 0         | 0         |

|   |          |          |   |          |          |          |   |   |
|---|----------|----------|---|----------|----------|----------|---|---|
| 0 | 0        | 0        | 0 | 0        | 0        | 6.57E-05 | 0 | 0 |
| 0 | 0        | 0        | 0 | 0        | 0        | 0.000263 | 0 | 0 |
| 0 | 0        | 0        | 0 | 0        | 0        | 9.86E-05 | 0 | 0 |
| 0 | 0        | 3.29E-05 | 0 | 3.29E-05 | 0        | 0.000131 | 0 | 0 |
| 0 | 0        | 0        | 0 | 0        | 0        | 0        | 0 | 0 |
| 0 | 0        | 0        | 0 | 0        | 0        | 3.29E-05 | 0 | 0 |
| 0 | 0        | 0        | 0 | 0        | 0        | 0.000394 | 0 | 0 |
| 0 | 0        | 0        | 0 | 0        | 0        | 0.000164 | 0 | 0 |
| 0 | 0        | 0        | 0 | 3.29E-05 | 0        | 0        | 0 | 0 |
| 0 | 0        | 0        | 0 | 6.57E-05 | 0        | 0.000197 | 0 | 0 |
| 0 | 0        | 0.001644 | 0 | 0        | 0        | 0.019494 | 0 | 0 |
| 0 | 0        | 0        | 0 | 0        | 0        | 0.000131 | 0 | 0 |
| 0 | 0        | 0        | 0 | 0        | 0        | 0.000559 | 0 | 0 |
| 0 | 0        | 0        | 0 | 3.29E-05 | 0        | 0.00023  | 0 | 0 |
| 0 | 0        | 0        | 0 | 3.29E-05 | 0        | 0        | 0 | 0 |
| 0 | 0        | 0        | 0 | 3.29E-05 | 0        | 0.003781 | 0 | 0 |
| 0 | 0        | 0        | 0 | 0        | 0        | 0        | 0 | 0 |
| 0 | 0        | 0        | 0 | 0        | 0        | 0        | 0 | 0 |
| 0 | 0        | 0        | 0 | 0        | 0        | 0        | 0 | 0 |
| 0 | 0        | 0.000131 | 0 | 0        | 3.29E-05 | 0.00046  | 0 | 0 |
| 0 | 0        | 0        | 0 | 0        | 0        | 0.001677 | 0 | 0 |
| 0 | 0        | 0        | 0 | 0        | 0        | 0.000789 | 0 | 0 |
| 0 | 0        | 0        | 0 | 0        | 0        | 0.000329 | 0 | 0 |
| 0 | 0        | 0        | 0 | 0        | 0        | 0.000394 | 0 | 0 |
| 0 | 0        | 0        | 0 | 0        | 0        | 0.000986 | 0 | 0 |
| 0 | 0        | 0        | 0 | 0        | 0        | 3.29E-05 | 0 | 0 |
| 0 | 0        | 0        | 0 | 0        | 0        | 0.000164 | 0 | 0 |
| 0 | 0        | 0        | 0 | 0        | 0        | 0        | 0 | 0 |
| 0 | 3.29E-05 | 0.000822 | 0 | 0        | 0        | 0.001414 | 0 | 0 |
| 0 | 0        | 0        | 0 | 0        | 0        | 0        | 0 | 0 |
| 0 | 0        | 0        | 0 | 0        | 0        | 0.00023  | 0 | 0 |
| 0 | 0        | 0        | 0 | 0        | 0        | 9.86E-05 | 0 | 0 |
| 0 | 0        | 6.57E-05 | 0 | 0        | 0        | 0.00069  | 0 | 0 |
| 0 | 0        | 0        | 0 | 3.29E-05 | 0        | 0        | 0 | 0 |
| 0 | 0        | 3.29E-05 | 0 | 6.57E-05 | 0        | 0.000953 | 0 | 0 |
| 0 | 0        | 6.57E-05 | 0 | 0        | 0        | 9.86E-05 | 0 | 0 |
| 0 | 0        | 0.00332  | 0 | 0        | 0        | 0.002038 | 0 | 0 |
| 0 | 0        | 0.003386 | 0 | 0        | 0.00069  | 0.085144 | 0 | 0 |
| 0 | 0        | 0        | 0 | 0        | 0        | 0.003715 | 0 | 0 |
| 0 | 0        | 3.29E-05 | 0 | 0        | 0        | 0.004372 | 0 | 0 |
| 0 | 3.29E-05 | 6.57E-05 | 0 | 0.00023  | 0        | 0.001381 | 0 | 0 |
| 0 | 3.29E-05 | 0        | 0 | 3.29E-05 | 0        | 0.00046  | 0 | 0 |
| 0 | 0        | 0        | 0 | 0        | 0        | 0.000427 | 0 | 0 |
| 0 | 0        | 0.00263  | 0 | 0        | 0        | 0.025247 | 0 | 0 |
| 0 | 0        | 0        | 0 | 3.29E-05 | 0        | 0.004208 | 0 | 0 |
| 0 | 0        | 0        | 0 | 3.29E-05 | 0        | 0.002827 | 0 | 0 |
| 0 | 0        | 0        | 0 | 0        | 0        | 0.000329 | 0 | 0 |



|   |   |          |   |          |   |          |   |          |
|---|---|----------|---|----------|---|----------|---|----------|
| 0 | 0 | 6.57E-05 | 0 | 0        | 0 | 0.000493 | 0 | 0        |
| 0 | 0 | 0        | 0 | 0        | 0 | 0.000362 | 0 | 0        |
| 0 | 0 | 0        | 0 | 0        | 0 | 0.00046  | 0 | 0        |
| 0 | 0 | 0        | 0 | 3.29E-05 | 0 | 0.001742 | 0 | 0        |
| 0 | 0 | 0        | 0 | 0        | 0 | 0.000394 | 0 | 0        |
| 0 | 0 | 0        | 0 | 0        | 0 | 0.00023  | 0 | 0        |
| 0 | 0 | 0        | 0 | 0        | 0 | 0.000164 | 0 | 0        |
| 0 | 0 | 0        | 0 | 0        | 0 | 6.57E-05 | 0 | 0        |
| 0 | 0 | 0        | 0 | 0        | 0 | 3.29E-05 | 0 | 0        |
| 0 | 0 | 0        | 0 | 0        | 0 | 0        | 0 | 0        |
| 0 | 0 | 6.57E-05 | 0 | 0.000164 | 0 | 0.000164 | 0 | 0        |
| 0 | 0 | 3.29E-05 | 0 | 6.57E-05 | 0 | 3.29E-05 | 0 | 0        |
| 0 | 0 | 0.000562 | 0 | 7.02E-05 | 0 | 0.008919 | 0 | 0        |
| 0 | 0 | 3.29E-05 | 0 | 0        | 0 | 0.002071 | 0 | 0        |
| 0 | 0 | 3.29E-05 | 0 | 0        | 0 | 0.002433 | 0 | 0        |
| 0 | 0 | 0        | 0 | 3.29E-05 | 0 | 0.003287 | 0 | 0        |
| 0 | 0 | 0        | 0 | 0        | 0 | 0.000625 | 0 | 0        |
| 0 | 0 | 0        | 0 | 0        | 0 | 0.000296 | 0 | 0        |
| 0 | 0 | 0        | 0 | 0        | 0 | 0        | 0 | 0        |
| 0 | 0 | 0        | 0 | 0        | 0 | 0.000822 | 0 | 0        |
| 0 | 0 | 3.29E-05 | 0 | 0        | 0 | 0.006049 | 0 | 0        |
| 0 | 0 | 0        | 0 | 3.29E-05 | 0 | 0.000296 | 0 | 0        |
| 0 | 0 | 9.86E-05 | 0 | 0        | 0 | 0.000197 | 0 | 0        |
| 0 | 0 | 9.86E-05 | 0 | 3.29E-05 | 0 | 6.57E-05 | 0 | 0        |
| 0 | 0 | 3.29E-05 | 0 | 0        | 0 | 0.000131 | 0 | 0        |
| 0 | 0 | 0        | 0 | 6.57E-05 | 0 | 3.29E-05 | 0 | 0        |
| 0 | 0 | 0        | 0 | 0        | 0 | 0        | 0 | 0        |
| 0 | 0 | 3.29E-05 | 0 | 0        | 0 | 3.29E-05 | 0 | 0        |
| 0 | 0 | 0        | 0 | 0        | 0 | 6.57E-05 | 0 | 0        |
| 0 | 0 | 3.29E-05 | 0 | 0        | 0 | 0.000263 | 0 | 0        |
| 0 | 0 | 3.29E-05 | 0 | 0        | 0 | 0        | 0 | 0        |
| 0 | 0 | 0        | 0 | 0        | 0 | 3.29E-05 | 0 | 0        |
| 0 | 0 | 3.29E-05 | 0 | 0        | 0 | 0.00046  | 0 | 0        |
| 0 | 0 | 0        | 0 | 9.86E-05 | 0 | 0.000296 | 0 | 0        |
| 0 | 0 | 0        | 0 | 9.86E-05 | 0 | 0.000296 | 0 | 0        |
| 0 | 0 | 0        | 0 | 3.29E-05 | 0 | 3.29E-05 | 0 | 0        |
| 0 | 0 | 0        | 0 | 0        | 0 | 0.000164 | 0 | 0        |
| 0 | 0 | 0        | 0 | 0        | 0 | 6.57E-05 | 0 | 0        |
| 0 | 0 | 0        | 0 | 3.29E-05 | 0 | 0.00023  | 0 | 0        |
| 0 | 0 | 0        | 0 | 0        | 0 | 0        | 0 | 0        |
| 0 | 0 | 0.001282 | 0 | 3.29E-05 | 0 | 0.002235 | 0 | 0        |
| 0 | 0 | 0        | 0 | 0        | 0 | 0.0048   | 0 | 0        |
| 0 | 0 | 0        | 0 | 0        | 0 | 0        | 0 | 0        |
| 0 | 0 | 3.29E-05 | 0 | 0        | 0 | 9.86E-05 | 0 | 0        |
| 0 | 0 | 3.29E-05 | 0 | 3.29E-05 | 0 | 0.000493 | 0 | 0        |
| 0 | 0 | 0        | 0 | 0        | 0 | 3.29E-05 | 0 | 0        |
| 0 | 0 | 3.29E-05 | 0 | 6.57E-05 | 0 | 0.000625 | 0 | 6.57E-05 |

|          |          |          |   |          |   |          |   |          |
|----------|----------|----------|---|----------|---|----------|---|----------|
| 0        | 0        | 3.29E-05 | 0 | 6.57E-05 | 0 | 6.57E-05 | 0 | 0        |
| 0        | 0        | 0        | 0 | 0        | 0 | 0        | 0 | 0        |
| 0        | 0        | 0        | 0 | 0        | 0 | 3.29E-05 | 0 | 0        |
| 0        | 0        | 0        | 0 | 0        | 0 | 3.29E-05 | 0 | 0        |
| 0        | 0        | 0        | 0 | 0        | 0 | 0        | 0 | 0        |
| 0        | 0        | 0        | 0 | 0        | 0 | 0.000394 | 0 | 0        |
| 0        | 0        | 0        | 0 | 0        | 0 | 0.000263 | 0 | 0        |
| 0        | 0        | 0        | 0 | 0        | 0 | 0.001677 | 0 | 0        |
| 0        | 0        | 0        | 0 | 0        | 0 | 0.001019 | 0 | 3.29E-05 |
| 0        | 0        | 0        | 0 | 3.29E-05 | 0 | 9.86E-05 | 0 | 0        |
| 0        | 0        | 0        | 0 | 0        | 0 | 0.000953 | 0 | 0        |
| 0        | 0        | 0        | 0 | 0        | 0 | 0.042868 | 0 | 0        |
| 0        | 0        | 0        | 0 | 0        | 0 | 0.002433 | 0 | 0        |
| 0        | 0        | 0.000362 | 0 | 3.29E-05 | 0 | 0.006016 | 0 | 0        |
| 0        | 0        | 0.00023  | 0 | 0        | 0 | 0.005391 | 0 | 0        |
| 0        | 0        | 0        | 0 | 0        | 0 | 0.000427 | 0 | 0        |
| 0        | 0        | 6.57E-05 | 0 | 3.29E-05 | 0 | 0.000394 | 0 | 0        |
| 0        | 0        | 0        | 0 | 0        | 0 | 0.000296 | 0 | 0.000131 |
| 0        | 0        | 0        | 0 | 0        | 0 | 0.001709 | 0 | 6.57E-05 |
| 0        | 0        | 0        | 0 | 0        | 0 | 0.006279 | 0 | 0        |
| 0        | 0        | 0        | 0 | 0        | 0 | 0.006345 | 0 | 0        |
| 0        | 0        | 0        | 0 | 0        | 0 | 0.001151 | 0 | 0        |
| 3.29E-05 | 0        | 0.00023  | 0 | 0.000197 | 0 | 0.001085 | 0 | 0        |
| 0        | 0        | 0        | 0 | 0        | 0 | 0.00023  | 0 | 0        |
| 0        | 0        | 0        | 0 | 0        | 0 | 0.000855 | 0 | 0        |
| 0        | 0        | 0        | 0 | 0        | 0 | 0.001677 | 0 | 0        |
| 0        | 0        | 3.29E-05 | 0 | 3.29E-05 | 0 | 0.005983 | 0 | 0        |
| 0        | 0        | 0.000329 | 0 | 0        | 0 | 0.00743  | 0 | 0        |
| 0        | 3.29E-05 | 0.00046  | 0 | 6.57E-05 | 0 | 0.004635 | 0 | 0        |
| 0        | 0        | 0        | 0 | 0        | 0 | 0.002564 | 0 | 0        |
| 0        | 0        | 0        | 0 | 0        | 0 | 0.004898 | 0 | 0        |
| 0        | 0        | 0        | 0 | 0        | 0 | 0.004175 | 0 | 0        |
| 0        | 3.29E-05 | 0.002071 | 0 | 0        | 0 | 0.024557 | 0 | 0        |
| 0        | 0        | 0        | 0 | 0        | 0 | 0.001742 | 0 | 0        |
| 0        | 0        | 0        | 0 | 0        | 0 | 0.002827 | 0 | 0        |
| 0        | 0        | 0.002893 | 0 | 3.29E-05 | 0 | 0.00332  | 0 | 0        |
| 0        | 0        | 0        | 0 | 0        | 0 | 0.000197 | 0 | 0        |
| 0        | 0        | 0        | 0 | 0        | 0 | 0.001183 | 0 | 0        |
| 0        | 0        | 0        | 0 | 0        | 0 | 0.012755 | 0 | 0        |
| 0        | 0        | 0        | 0 | 0        | 0 | 0.001841 | 0 | 0        |
| 0        | 0        | 0        | 0 | 3.29E-05 | 0 | 0.001249 | 0 | 0        |
| 0        | 0        | 3.29E-05 | 0 | 0        | 0 | 0.010388 | 0 | 0        |
| 0        | 0        | 0        | 0 | 0        | 0 | 0.004833 | 0 | 0        |
| 0        | 0        | 0        | 0 | 0        | 0 | 0.004076 | 0 | 0        |
| 0        | 0        | 3.29E-05 | 0 | 0        | 0 | 0.011473 | 0 | 0        |
| 0        | 0        | 0        | 0 | 0        | 0 | 9.86E-05 | 0 | 0        |
| 0        | 0        | 0.000329 | 0 | 0        | 0 | 0.00286  | 0 | 0        |

|   |          |          |          |          |         |          |   |   |
|---|----------|----------|----------|----------|---------|----------|---|---|
| 0 | 0        | 0        | 0        | 0        | 0       | 0.001282 | 0 | 0 |
| 0 | 0        | 0        | 0        | 0        | 0       | 9.86E-05 | 0 | 0 |
| 0 | 0        | 0.000986 | 0        | 3.29E-05 | 0.00023 | 0.015319 | 0 | 0 |
| 0 | 0        | 3.29E-05 | 0        | 0        | 0       | 9.86E-05 | 0 | 0 |
| 0 | 0        | 0        | 0        | 0        | 0       | 9.86E-05 | 0 | 0 |
| 0 | 0        | 0.000197 | 0        | 0        | 0       | 0.003386 | 0 | 0 |
| 0 | 0        | 0        | 0        | 0        | 0       | 0.001085 | 0 | 0 |
| 0 | 0        | 6.57E-05 | 0        | 3.29E-05 | 0       | 0.003024 | 0 | 0 |
| 0 | 0        | 6.57E-05 | 0        | 3.29E-05 | 0       | 0.004602 | 0 | 0 |
| 0 | 0        | 0        | 0        | 3.29E-05 | 0       | 0.00309  | 0 | 0 |
| 0 | 0        | 0        | 0        | 0        | 0       | 0.002992 | 0 | 0 |
| 0 | 0        | 3.29E-05 | 0        | 0        | 0       | 0.000855 | 0 | 0 |
| 0 | 0        | 3.29E-05 | 0        | 0        | 0       | 0.000296 | 0 | 0 |
| 0 | 0        | 3.29E-05 | 0        | 0        | 0       | 0.000559 | 0 | 0 |
| 0 | 0        | 0        | 0        | 0        | 0       | 0.003879 | 0 | 0 |
| 0 | 3.29E-05 | 0        | 0        | 0        | 0       | 0.00263  | 0 | 0 |
| 0 | 0        | 0        | 0        | 0        | 0       | 0.002531 | 0 | 0 |
| 0 | 0        | 0.000329 | 0        | 3.29E-05 | 0       | 0.001545 | 0 | 0 |
| 0 | 0        | 0        | 0        | 3.29E-05 | 0       | 0.000625 | 0 | 0 |
| 0 | 0        | 0        | 0        | 6.57E-05 | 0       | 0.0024   | 0 | 0 |
| 0 | 0        | 0        | 0        | 0        | 0       | 0.001315 | 0 | 0 |
| 0 | 0        | 0.000822 | 0        | 9.86E-05 | 0       | 0.00092  | 0 | 0 |
| 0 | 0        | 3.29E-05 | 0        | 3.29E-05 | 0       | 9.86E-05 | 0 | 0 |
| 0 | 0        | 0        | 0        | 0        | 0       | 0        | 0 | 0 |
| 0 | 0        | 0        | 0        | 0        | 0       | 0.00217  | 0 | 0 |
| 0 | 0        | 0        | 0        | 0        | 0       | 0.014037 | 0 | 0 |
| 0 | 0        | 0        | 0        | 3.29E-05 | 0       | 0.002104 | 0 | 0 |
| 0 | 0        | 0.000394 | 0        | 0        | 0       | 0.002498 | 0 | 0 |
| 0 | 0        | 3.29E-05 | 0        | 0        | 0       | 0        | 0 | 0 |
| 0 | 0        | 0        | 0        | 0        | 0       | 0.001249 | 0 | 0 |
| 0 | 0        | 0        | 0        | 0        | 0       | 0.001348 | 0 | 0 |
| 0 | 0        | 0        | 0        | 0        | 0       | 0        | 0 | 0 |
| 0 | 0        | 0.000164 | 0        | 0        | 0       | 0.00023  | 0 | 0 |
| 0 | 0        | 0        | 0        | 0        | 0       | 0.00046  | 0 | 0 |
| 0 | 0        | 3.29E-05 | 0        | 0        | 0       | 0.000493 | 0 | 0 |
| 0 | 0        | 0        | 0        | 0        | 0       | 0.001512 | 0 | 0 |
| 0 | 0        | 3.29E-05 | 0        | 3.29E-05 | 0       | 0.000592 | 0 | 0 |
| 0 | 0        | 0        | 0        | 0        | 0       | 0.000131 | 0 | 0 |
| 0 | 0        | 3.29E-05 | 0        | 3.29E-05 | 0       | 0.001709 | 0 | 0 |
| 0 | 0        | 3.29E-05 | 0        | 0        | 0       | 9.86E-05 | 0 | 0 |
| 0 | 0        | 0        | 0        | 0        | 0       | 3.29E-05 | 0 | 0 |
| 0 | 0        | 0        | 0        | 0        | 0       | 0.000131 | 0 | 0 |
| 0 | 0        | 0        | 0        | 0        | 0       | 0.00023  | 0 | 0 |
| 0 | 0        | 0        | 0        | 6.57E-05 | 0       | 0        | 0 | 0 |
| 0 | 0        | 0        | 0        | 0        | 0       | 0.000164 | 0 | 0 |
| 0 | 0        | 9.86E-05 | 0        | 0        | 0       | 0.003386 | 0 | 0 |
| 0 | 0        | 0.001052 | 3.29E-05 | 0        | 0       | 0.006443 | 0 | 0 |

|   |          |          |   |          |   |          |   |          |
|---|----------|----------|---|----------|---|----------|---|----------|
| 0 | 0        | 0.000197 | 0 | 0        | 0 | 0.001644 | 0 | 0        |
| 0 | 0        | 0        | 0 | 0        | 0 | 0.008153 | 0 | 0        |
| 0 | 0        | 0        | 0 | 0.000197 | 0 | 0        | 0 | 0        |
| 0 | 0        | 0        | 0 | 0        | 0 | 9.86E-05 | 0 | 0        |
| 0 | 0        | 0.001315 | 0 | 0        | 0 | 0.003945 | 0 | 0.000329 |
| 0 | 0        | 0        | 0 | 0        | 0 | 0.006016 | 0 | 0        |
| 0 | 0        | 0        | 0 | 0        | 0 | 0.003781 | 0 | 0        |
| 0 | 0        | 0        | 0 | 0        | 0 | 0.002827 | 0 | 0        |
| 0 | 0        | 0        | 0 | 0        | 0 | 0.006246 | 0 | 0        |
| 0 | 0        | 0        | 0 | 0        | 0 | 0.00355  | 0 | 0        |
| 0 | 0        | 0        | 0 | 0        | 0 | 0.006871 | 0 | 0        |
| 0 | 0        | 0        | 0 | 0        | 0 | 0.000427 | 0 | 0        |
| 0 | 0        | 0        | 0 | 0        | 0 | 0.014925 | 0 | 0        |
| 0 | 0        | 0        | 0 | 0        | 0 | 0.001216 | 0 | 0        |
| 0 | 0        | 0        | 0 | 0        | 0 | 3.29E-05 | 0 | 6.57E-05 |
| 0 | 0        | 0        | 0 | 0        | 0 | 6.57E-05 | 0 | 0        |
| 0 | 0        | 0        | 0 | 0        | 0 | 9.86E-05 | 0 | 0        |
| 0 | 0        | 0        | 0 | 0        | 0 | 0.000164 | 0 | 0        |
| 0 | 0        | 3.29E-05 | 0 | 0        | 0 | 0.000559 | 0 | 0        |
| 0 | 0        | 0        | 0 | 0        | 0 | 0        | 0 | 0        |
| 0 | 0        | 0        | 0 | 0        | 0 | 0        | 0 | 0        |
| 0 | 0        | 0        | 0 | 0        | 0 | 3.29E-05 | 0 | 0        |
| 0 | 0        | 9.86E-05 | 0 | 0        | 0 | 0.000657 | 0 | 0        |
| 0 | 0        | 0        | 0 | 0        | 0 | 0.00023  | 0 | 0        |
| 0 | 0        | 0        | 0 | 0        | 0 | 0.000131 | 0 | 0        |
| 0 | 0        | 0        | 0 | 0        | 0 | 0.000625 | 0 | 0        |
| 0 | 0        | 0        | 0 | 0        | 0 | 0.000131 | 0 | 0        |
| 0 | 0        | 0        | 0 | 0        | 0 | 0        | 0 | 0        |
| 0 | 0        | 0.00023  | 0 | 3.29E-05 | 0 | 0.005819 | 0 | 0        |
| 0 | 0        | 3.29E-05 | 0 | 0        | 0 | 6.57E-05 | 0 | 0        |
| 0 | 0        | 0        | 0 | 0        | 0 | 0.000822 | 0 | 0        |
| 0 | 0        | 0        | 0 | 0        | 0 | 0.000329 | 0 | 0        |
| 0 | 3.29E-05 | 3.29E-05 | 0 | 0        | 0 | 0.001249 | 0 | 0        |
| 0 | 0        | 6.57E-05 | 0 | 0        | 0 | 0.000493 | 0 | 0        |
| 0 | 0        | 0        | 0 | 6.57E-05 | 0 | 9.86E-05 | 0 | 0        |
| 0 | 0        | 0        | 0 | 0.000197 | 0 | 0.001644 | 0 | 0        |
| 0 | 0        | 3.29E-05 | 0 | 0        | 0 | 0.001315 | 0 | 0        |
| 0 | 0        | 0        | 0 | 0        | 0 | 0.000493 | 0 | 0        |
| 0 | 0.001249 | 0.000526 | 0 | 0        | 0 | 0.005589 | 0 | 0        |
| 0 | 0        | 0        | 0 | 0        | 0 | 0.000723 | 0 | 0        |
| 0 | 0        | 0        | 0 | 0        | 0 | 3.29E-05 | 0 | 0        |
| 0 | 0        | 0        | 0 | 6.57E-05 | 0 | 0.000592 | 0 | 0        |
| 0 | 0        | 0        | 0 | 0        | 0 | 0.004241 | 0 | 0        |
| 0 | 0        | 0        | 0 | 0        | 0 | 0.000592 | 0 | 0        |
| 0 | 0        | 9.86E-05 | 0 | 0        | 0 | 0.001545 | 0 | 0        |
| 0 | 0        | 0        | 0 | 0        | 0 | 6.57E-05 | 0 | 0        |
| 0 | 0        | 3.29E-05 | 0 | 0        | 0 | 0.000164 | 0 | 0        |

|   |          |          |          |          |   |          |   |   |
|---|----------|----------|----------|----------|---|----------|---|---|
| 0 | 0        | 3.29E-05 | 0        | 3.29E-05 | 0 | 0.002038 | 0 | 0 |
| 0 | 3.29E-05 | 3.29E-05 | 0        | 0        | 0 | 0.000789 | 0 | 0 |
| 0 | 0        | 0        | 0        | 0        | 0 | 3.29E-05 | 0 | 0 |
| 0 | 0        | 3.29E-05 | 0        | 0        | 0 | 0.001348 | 0 | 0 |
| 0 | 0        | 9.86E-05 | 0        | 0        | 0 | 0.000394 | 0 | 0 |
| 0 | 0        | 0        | 0        | 0        | 0 | 0.001874 | 0 | 0 |
| 0 | 0        | 0        | 0        | 0        | 0 | 0.015714 | 0 | 0 |
| 0 | 0        | 3.29E-05 | 0        | 0        | 0 | 0.017095 | 0 | 0 |
| 0 | 0        | 0.000164 | 0        | 0        | 0 | 0.046254 | 0 | 0 |
| 0 | 0        | 0        | 0        | 0        | 0 | 0.026299 | 0 | 0 |
| 0 | 0        | 3.29E-05 | 0        | 0        | 0 | 0.002301 | 0 | 0 |
| 0 | 0        | 0        | 0        | 0        | 0 | 0.0024   | 0 | 0 |
| 0 | 0        | 0        | 0        | 0        | 0 | 0.058911 | 0 | 0 |
| 0 | 0        | 0        | 0        | 0        | 0 | 0.006739 | 0 | 0 |
| 0 | 0        | 0.000263 | 3.29E-05 | 0        | 0 | 3.29E-05 | 0 | 0 |
| 0 | 0        | 0.000164 | 0        | 0        | 0 | 0.000625 | 0 | 0 |
| 0 | 0        | 0        | 0        | 0        | 0 | 0.002235 | 0 | 0 |
| 0 | 0        | 0        | 0        | 0        | 0 | 0.000362 | 0 | 0 |
| 0 | 0        | 0        | 0        | 0        | 0 | 3.29E-05 | 0 | 0 |
| 0 | 0        | 0        | 0        | 0        | 0 | 3.29E-05 | 0 | 0 |
| 0 | 0        | 0.000164 | 0        | 0        | 0 | 0        | 0 | 0 |
| 0 | 0        | 0        | 0        | 0        | 0 | 0        | 0 | 0 |
| 0 | 0        | 6.57E-05 | 0        | 0        | 0 | 0.001282 | 0 | 0 |
| 0 | 0        | 0.000164 | 0        | 0        | 0 | 0.000427 | 0 | 0 |
| 0 | 0        | 0        | 0        | 0        | 0 | 0        | 0 | 0 |
| 0 | 0        | 0        | 0        | 0        | 0 | 0        | 0 | 0 |
| 0 | 0        | 0        | 0        | 0        | 0 | 0.000197 | 0 | 0 |
| 0 | 0        | 0.000131 | 0        | 0        | 0 | 0.000164 | 0 | 0 |
| 0 | 0        | 0        | 0        | 0        | 0 | 0.000197 | 0 | 0 |
| 0 | 0        | 0        | 0        | 0        | 0 | 0.000263 | 0 | 0 |
| 0 | 0        | 0        | 0        | 0        | 0 | 0        | 0 | 0 |
| 0 | 0        | 0        | 0        | 0        | 0 | 0.001414 | 0 | 0 |
| 0 | 0        | 0        | 0        | 0        | 0 | 0.00023  | 0 | 0 |
| 0 | 0        | 0        | 0        | 0        | 0 | 3.29E-05 | 0 | 0 |
| 0 | 0        | 0        | 0        | 0        | 0 | 0        | 0 | 0 |
| 0 | 0        | 0        | 0        | 0        | 0 | 0.001183 | 0 | 0 |
| 0 | 0        | 0.000131 | 0        | 0        | 0 | 0.010618 | 0 | 0 |
| 0 | 3.29E-05 | 0.000197 | 0        | 0        | 0 | 0.006542 | 0 | 0 |
| 0 | 0        | 0        | 0        | 3.29E-05 | 0 | 0.001052 | 0 | 0 |
| 0 | 0        | 0.000723 | 0        | 3.29E-05 | 0 | 0.003616 | 0 | 0 |
| 0 | 0        | 3.29E-05 | 0        | 3.29E-05 | 0 | 0.00046  | 0 | 0 |
| 0 | 0        | 0        | 0        | 0        | 0 | 6.57E-05 | 0 | 0 |
| 0 | 0        | 3.29E-05 | 0        | 3.29E-05 | 0 | 0.000953 | 0 | 0 |
| 0 | 0        | 3.29E-05 | 0        | 0        | 0 | 0.003222 | 0 | 0 |
| 0 | 0        | 0        | 0        | 3.29E-05 | 0 | 0.000362 | 0 | 0 |
| 0 | 0        | 0        | 0        | 9.86E-05 | 0 | 0.001348 | 0 | 0 |
| 0 | 0        | 3.29E-05 | 0        | 0        | 0 | 0.00023  | 0 | 0 |

|   |          |          |   |          |   |          |   |          |
|---|----------|----------|---|----------|---|----------|---|----------|
| 0 | 0        | 0        | 0 | 0        | 0 | 0.000559 | 0 | 0        |
| 0 | 0        | 0        | 0 | 0        | 0 | 0.000164 | 0 | 0        |
| 0 | 0        | 0        | 0 | 0        | 0 | 0.002926 | 0 | 0        |
| 0 | 0        | 0        | 0 | 6.57E-05 | 0 | 0.000131 | 0 | 0        |
| 0 | 0        | 6.57E-05 | 0 | 0.000164 | 0 | 0.00046  | 0 | 0        |
| 0 | 0        | 6.57E-05 | 0 | 9.86E-05 | 0 | 0.000197 | 0 | 0        |
| 0 | 0        | 0        | 0 | 3.29E-05 | 0 | 6.57E-05 | 0 | 0        |
| 0 | 3.29E-05 | 0        | 0 | 0        | 0 | 0.00023  | 0 | 0        |
| 0 | 0        | 3.29E-05 | 0 | 0        | 0 | 0.000131 | 0 | 0        |
| 0 | 0        | 0        | 0 | 3.29E-05 | 0 | 9.86E-05 | 0 | 0        |
| 0 | 0        | 0        | 0 | 0        | 0 | 0.000131 | 0 | 0        |
| 0 | 0        | 0        | 0 | 0        | 0 | 0        | 0 | 0        |
| 0 | 0        | 0        | 0 | 0        | 0 | 3.29E-05 | 0 | 0        |
| 0 | 0        | 0        | 0 | 0        | 0 | 0.001512 | 0 | 0        |
| 0 | 0        | 0        | 0 | 3.29E-05 | 0 | 0        | 0 | 0        |
| 0 | 0        | 0        | 0 | 0        | 0 | 0.000723 | 0 | 0        |
| 0 | 0        | 0        | 0 | 3.29E-05 | 0 | 0.004175 | 0 | 0        |
| 0 | 0        | 0        | 0 | 0        | 0 | 0.008021 | 0 | 0        |
| 0 | 0        | 9.86E-05 | 0 | 0        | 0 | 0.001545 | 0 | 0        |
| 0 | 0        | 0.000329 | 0 | 6.57E-05 | 0 | 0.003156 | 0 | 0        |
| 0 | 0        | 3.29E-05 | 0 | 0        | 0 | 0.000362 | 0 | 0        |
| 0 | 0        | 0.000164 | 0 | 0        | 0 | 0.001085 | 0 | 0        |
| 0 | 0        | 0        | 0 | 0        | 0 | 0.001446 | 0 | 0        |
| 0 | 0        | 0        | 0 | 0        | 0 | 0.00023  | 0 | 0        |
| 0 | 0        | 0        | 0 | 0        | 0 | 0        | 0 | 0        |
| 0 | 0        | 0        | 0 | 0        | 0 | 3.29E-05 | 0 | 0        |
| 0 | 0        | 0        | 0 | 0        | 0 | 9.86E-05 | 0 | 9.86E-05 |
| 0 | 0        | 0        | 0 | 0        | 0 | 0.000263 | 0 | 0        |
| 0 | 0        | 0        | 0 | 0        | 0 | 0.000131 | 0 | 0        |
| 0 | 0        | 3.29E-05 | 0 | 0        | 0 | 0.000164 | 0 | 0        |
| 0 | 0        | 0        | 0 | 0        | 0 | 6.57E-05 | 0 | 0        |
| 0 | 0        | 0        | 0 | 0        | 0 | 0.006312 | 0 | 0        |
| 0 | 0        | 3.29E-05 | 0 | 0        | 0 | 0.031954 | 0 | 0        |
| 0 | 0        | 0        | 0 | 0        | 0 | 0.056839 | 0 | 0        |
| 0 | 0        | 0        | 0 | 0        | 0 | 0.086985 | 0 | 0        |
| 0 | 0        | 0        | 0 | 0        | 0 | 0.094053 | 0 | 0        |
| 0 | 0        | 0        | 0 | 0        | 0 | 0.004504 | 0 | 0        |
| 0 | 0        | 0        | 0 | 0        | 0 | 0.004076 | 0 | 0        |
| 0 | 0.000526 | 6.57E-05 | 0 | 3.29E-05 | 0 | 0.033762 | 0 | 0        |
| 0 | 0        | 3.29E-05 | 0 | 0        | 0 | 0.004044 | 0 | 0        |
| 0 | 0        | 0        | 0 | 0        | 0 | 0.001611 | 0 | 0        |
| 0 | 0        | 0.000131 | 0 | 6.57E-05 | 0 | 0.000657 | 0 | 0        |
| 0 | 0        | 0        | 0 | 0        | 0 | 0.002761 | 0 | 0        |
| 0 | 0        | 0        | 0 | 0        | 0 | 0.003912 | 0 | 0        |
| 0 | 0        | 0        | 0 | 0        | 0 | 0.000855 | 0 | 0        |
| 0 | 0        | 0        | 0 | 0        | 0 | 0.004208 | 0 | 0        |
| 0 | 0        | 0.000953 | 0 | 0        | 0 | 0.022519 | 0 | 0        |

|   |          |          |   |          |          |          |   |   |
|---|----------|----------|---|----------|----------|----------|---|---|
| 0 | 0        | 0        | 0 | 0        | 0        | 0.000756 | 0 | 0 |
| 0 | 3.29E-05 | 0        | 0 | 3.29E-05 | 0        | 0.000855 | 0 | 0 |
| 0 | 0        | 0.000329 | 0 | 0        | 0        | 0.005326 | 0 | 0 |
| 0 | 0        | 0.000362 | 0 | 0        | 0        | 0.006936 | 0 | 0 |
| 0 | 0        | 0.000131 | 0 | 0        | 0        | 0.001808 | 0 | 0 |
| 0 | 0        | 0        | 0 | 0        | 0        | 6.57E-05 | 0 | 0 |
| 0 | 0        | 0        | 0 | 0        | 0        | 0        | 0 | 0 |
| 0 | 0        | 3.29E-05 | 0 | 0        | 3.29E-05 | 0.000164 | 0 | 0 |
| 0 | 0        | 0        | 0 | 0        | 0        | 6.57E-05 | 0 | 0 |
| 0 | 0        | 0        | 0 | 0        | 0        | 0.000164 | 0 | 0 |
| 0 | 0        | 0        | 0 | 0        | 0        | 3.29E-05 | 0 | 0 |
| 0 | 0        | 0        | 0 | 0        | 0        | 0        | 0 | 0 |
| 0 | 0        | 0        | 0 | 0        | 0        | 0.000131 | 0 | 0 |
| 0 | 0        | 0        | 0 | 0        | 0        | 0.000131 | 0 | 0 |
| 0 | 0        | 0        | 0 | 0        | 0        | 6.57E-05 | 0 | 0 |
| 0 | 0        | 0        | 0 | 0        | 0        | 0.000394 | 0 | 0 |
| 0 | 0        | 0        | 0 | 0        | 0        | 0.001578 | 0 | 0 |
| 0 | 0        | 6.57E-05 | 0 | 0        | 0        | 0.000559 | 0 | 0 |
| 0 | 0        | 0        | 0 | 3.29E-05 | 0        | 0.000427 | 0 | 0 |
| 0 | 0        | 0.000164 | 0 | 0        | 0        | 0.003287 | 0 | 0 |
| 0 | 0        | 3.29E-05 | 0 | 9.86E-05 | 0.000789 | 0.013314 | 0 | 0 |
| 0 | 0        | 9.86E-05 | 0 | 6.57E-05 | 0        | 0.002203 | 0 | 0 |
| 0 | 0        | 3.29E-05 | 0 | 0        | 0        | 0.002498 | 0 | 0 |
| 0 | 0        | 3.29E-05 | 0 | 0        | 0        | 0.001085 | 0 | 0 |
| 0 | 0        | 0.000296 | 0 | 0        | 0        | 0.003222 | 0 | 0 |
| 0 | 0        | 0.000625 | 0 | 3.29E-05 | 0        | 0.001381 | 0 | 0 |
| 0 | 0        | 0        | 0 | 0        | 0        | 0.004372 | 0 | 0 |
| 0 | 0        | 0        | 0 | 0        | 0        | 0.000526 | 0 | 0 |
| 0 | 0        | 6.57E-05 | 0 | 3.29E-05 | 0        | 0.00069  | 0 | 0 |
| 0 | 0        | 0        | 0 | 0        | 0        | 6.57E-05 | 0 | 0 |
| 0 | 0        | 0        | 0 | 0        | 0        | 0.000756 | 0 | 0 |
| 0 | 0        | 0        | 0 | 0        | 0        | 0.000657 | 0 | 0 |
| 0 | 0        | 0        | 0 | 3.29E-05 | 0        | 0.000296 | 0 | 0 |
| 0 | 0        | 0        | 0 | 0        | 0        | 0.000263 | 0 | 0 |
| 0 | 0        | 0        | 0 | 0        | 0        | 6.57E-05 | 0 | 0 |
| 0 | 0        | 9.86E-05 | 0 | 0        | 0        | 0.012426 | 0 | 0 |
| 0 | 0        | 0        | 0 | 0        | 0        | 9.86E-05 | 0 | 0 |
| 0 | 0        | 0        | 0 | 0        | 0        | 0.021204 | 0 | 0 |
| 0 | 0        | 3.29E-05 | 0 | 0        | 0        | 0.002498 | 0 | 0 |
| 0 | 0        | 0        | 0 | 0        | 0        | 0.001019 | 0 | 0 |
| 0 | 0        | 0.000855 | 0 | 3.29E-05 | 0        | 0.002137 | 0 | 0 |
| 0 | 0        | 0        | 0 | 0        | 0        | 0.00194  | 0 | 0 |
| 0 | 0        | 6.57E-05 | 0 | 0        | 0        | 0.009632 | 0 | 0 |
| 0 | 0        | 0.00194  | 0 | 0        | 0        | 0.017949 | 0 | 0 |
| 0 | 0        | 0.000888 | 0 | 0        | 0        | 0.012196 | 0 | 0 |
| 0 | 0        | 0        | 0 | 0        | 0        | 0.003583 | 0 | 0 |
| 0 | 0        | 0        | 0 | 0        | 0        | 0.000723 | 0 | 0 |

|   |   |          |   |          |          |          |   |   |
|---|---|----------|---|----------|----------|----------|---|---|
| 0 | 0 | 0        | 0 | 0        | 0.000329 | 0        | 0 |   |
| 0 | 0 | 3.29E-05 | 0 | 3.29E-05 | 0        | 0.001019 | 0 | 0 |
| 0 | 0 | 0        | 0 | 0        | 0        | 0.001118 | 0 | 0 |
| 0 | 0 | 3.29E-05 | 0 | 9.86E-05 | 0        | 0.000855 | 0 | 0 |
| 0 | 0 | 0        | 0 | 0        | 0        | 0.000657 | 0 | 0 |
| 0 | 0 | 0        | 0 | 0        | 0        | 3.29E-05 | 0 | 0 |
| 0 | 0 | 0        | 0 | 0        | 0        | 0.052829 | 0 | 0 |
| 0 | 0 | 0        | 0 | 0        | 0        | 0.005523 | 0 | 0 |
| 0 | 0 | 0        | 0 | 0        | 0        | 0.053421 | 0 | 0 |
| 0 | 0 | 0        | 0 | 0        | 0        | 0.000394 | 0 | 0 |
| 0 | 0 | 0        | 0 | 0        | 0        | 0.000296 | 0 | 0 |
| 0 | 0 | 0        | 0 | 0        | 0        | 0.000296 | 0 | 0 |
| 0 | 0 | 0        | 0 | 0        | 0        | 0.00023  | 0 | 0 |
| 0 | 0 | 3.29E-05 | 0 | 0        | 0        | 0.002203 | 0 | 0 |
| 0 | 0 | 3.29E-05 | 0 | 0        | 0        | 0.000164 | 0 | 0 |
| 0 | 0 | 0        | 0 | 3.29E-05 | 0        | 0.00194  | 0 | 0 |
| 0 | 0 | 0        | 0 | 0        | 0        | 0.000855 | 0 | 0 |
| 0 | 0 | 0        | 0 | 9.86E-05 | 0        | 3.29E-05 | 0 | 0 |
| 0 | 0 | 0        | 0 | 0        | 0        | 3.29E-05 | 0 | 0 |
| 0 | 0 | 0        | 0 | 0        | 0        | 0.000197 | 0 | 0 |
| 0 | 0 | 0        | 0 | 0        | 0        | 0        | 0 | 0 |
| 0 | 0 | 0.00023  | 0 | 3.29E-05 | 0        | 0.000296 | 0 | 0 |
| 0 | 0 | 0        | 0 | 0        | 0        | 9.86E-05 | 0 | 0 |
| 0 | 0 | 0        | 0 | 3.29E-05 | 0        | 9.86E-05 | 0 | 0 |
| 0 | 0 | 3.29E-05 | 0 | 3.29E-05 | 0        | 0.001775 | 0 | 0 |
| 0 | 0 | 0        | 0 | 0        | 0        | 0.000789 | 0 | 0 |
| 0 | 0 | 0        | 0 | 0        | 0        | 0        | 0 | 0 |
| 0 | 0 | 0        | 0 | 0        | 0        | 6.57E-05 | 0 | 0 |
| 0 | 0 | 0        | 0 | 0        | 0        | 0.000888 | 0 | 0 |
| 0 | 0 | 0.000526 | 0 | 0        | 0        | 0.011309 | 0 | 0 |
| 0 | 0 | 0        | 0 | 0        | 0        | 0.000197 | 0 | 0 |
| 0 | 0 | 0        | 0 | 0        | 0        | 6.57E-05 | 0 | 0 |
| 0 | 0 | 0        | 0 | 0        | 0        | 6.57E-05 | 0 | 0 |
| 0 | 0 | 9.86E-05 | 0 | 0        | 0        | 0.003353 | 0 | 0 |
| 0 | 0 | 0        | 0 | 0        | 0        | 0.000756 | 0 | 0 |
| 0 | 0 | 0        | 0 | 0        | 0        | 0.067261 | 0 | 0 |
| 0 | 0 | 0        | 0 | 0        | 0        | 0.092409 | 0 | 0 |
| 0 | 0 | 0.000427 | 0 | 0        | 0        | 0.001512 | 0 | 0 |
| 0 | 0 | 0        | 0 | 0        | 0        | 0.000526 | 0 | 0 |
| 0 | 0 | 0.000559 | 0 | 0        | 0        | 0.012328 | 0 | 0 |
| 0 | 0 | 0        | 0 | 0        | 0        | 0.001381 | 0 | 0 |
| 0 | 0 | 0        | 0 | 0        | 0        | 0.000362 | 0 | 0 |
| 0 | 0 | 0        | 0 | 0        | 0        | 0.000197 | 0 | 0 |
| 0 | 0 | 0        | 0 | 0        | 0        | 9.86E-05 | 0 | 0 |
| 0 | 0 | 0        | 0 | 0        | 0        | 0.000559 | 0 | 0 |
| 0 | 0 | 9.86E-05 | 0 | 0        | 0        | 0.003616 | 0 | 0 |
| 0 | 0 | 0        | 0 | 0        | 0        | 9.86E-05 | 0 | 0 |



|   |   |          |   |          |          |          |          |          |
|---|---|----------|---|----------|----------|----------|----------|----------|
| 0 | 0 | 0        | 0 | 0        | 0        | 0.00286  | 0        | 0        |
| 0 | 0 | 0        | 0 | 0        | 0        | 0.001742 | 0        | 0        |
| 0 | 0 | 3.29E-05 | 0 | 0        | 0        | 0.001578 | 0        | 0        |
| 0 | 0 | 0        | 0 | 0        | 0        | 0.003287 | 0        | 0        |
| 0 | 0 | 0.000263 | 0 | 0        | 0        | 0.004339 | 0        | 0        |
| 0 | 0 | 3.29E-05 | 0 | 0        | 0        | 0.000131 | 0        | 0        |
| 0 | 0 | 0.000329 | 0 | 0        | 0        | 0.024261 | 0        | 0        |
| 0 | 0 | 0        | 0 | 0        | 0        | 0.058976 | 0        | 0        |
| 0 | 0 | 3.29E-05 | 0 | 0        | 0        | 0.020283 | 0        | 0        |
| 0 | 0 | 0        | 0 | 0        | 0        | 0.004142 | 0        | 0        |
| 0 | 0 | 0        | 0 | 6.57E-05 | 0        | 0.023143 | 0        | 0        |
| 0 | 0 | 0        | 0 | 6.57E-05 | 0        | 0.214471 | 0        | 0        |
| 0 | 0 | 0        | 0 | 0        | 0        | 0.209704 | 3.29E-05 | 0        |
| 0 | 0 | 0        | 0 | 6.57E-05 | 0        | 0.091489 | 0        | 0        |
| 0 | 0 | 0        | 0 | 0        | 9.86E-05 | 0.181235 | 0        | 9.86E-05 |
| 0 | 0 | 0        | 0 | 0        | 0        | 0.150202 | 0        | 0        |
| 0 | 0 | 3.29E-05 | 0 | 0        | 0        | 0.012229 | 0        | 0        |
| 0 | 0 | 0.00023  | 0 | 0        | 0        | 0.015122 | 0        | 0        |
| 0 | 0 | 0        | 0 | 0        | 0        | 0.05158  | 0        | 0        |
| 0 | 0 | 0        | 0 | 0        | 0        | 0.012131 | 0        | 0        |
| 0 | 0 | 0        | 0 | 0        | 0        | 0.014925 | 0        | 0        |
| 0 | 0 | 0        | 0 | 0        | 0        | 0.012952 | 0        | 0        |
| 0 | 0 | 0        | 0 | 0        | 0        | 0.006838 | 0        | 0        |
| 0 | 0 | 0        | 0 | 0        | 0        | 0.007364 | 0        | 0        |
| 0 | 0 | 0        | 0 | 0        | 0        | 0.000526 | 0        | 0        |
| 0 | 0 | 0        | 0 | 0        | 0        | 0.001085 | 0        | 0        |
| 0 | 0 | 0        | 0 | 3.29E-05 | 0        | 0.008547 | 0        | 0        |
| 0 | 0 | 0.00046  | 0 | 3.29E-05 | 0        | 0.002597 | 0        | 0        |
| 0 | 0 | 0.000329 | 0 | 0        | 0        | 0.002597 | 0        | 0        |
| 0 | 0 | 0        | 0 | 3.29E-05 | 0        | 0.000131 | 0        | 0        |
| 0 | 0 | 3.29E-05 | 0 | 3.29E-05 | 0        | 0.002827 | 0        | 0        |
| 0 | 0 | 0        | 0 | 0        | 0        | 0        | 0        | 0        |
| 0 | 0 | 6.57E-05 | 0 | 0        | 0        | 0.001775 | 0        | 0        |
| 0 | 0 | 0        | 0 | 0        | 0        | 0.000131 | 0        | 0        |
| 0 | 0 | 6.57E-05 | 0 | 0        | 0        | 0.007101 | 0        | 0        |
| 0 | 0 | 0        | 0 | 0        | 0        | 6.57E-05 | 0        | 0        |
| 0 | 0 | 0        | 0 | 0        | 0        | 0.000427 | 0        | 0        |
| 0 | 0 | 0        | 0 | 0        | 0        | 0.010191 | 0        | 0        |
| 0 | 0 | 0        | 0 | 0        | 0        | 0.001381 | 0        | 0        |
| 0 | 0 | 0.000362 | 0 | 3.29E-05 | 0        | 0.002498 | 0        | 0        |
| 0 | 0 | 0        | 0 | 0        | 0        | 0.00069  | 0        | 0        |
| 0 | 0 | 0        | 0 | 0        | 0        | 0.002597 | 0        | 0        |
| 0 | 0 | 0        | 0 | 0        | 0        | 0.003846 | 0        | 0        |
| 0 | 0 | 0        | 0 | 3.29E-05 | 0        | 0.002038 | 0        | 0        |
| 0 | 0 | 0        | 0 | 0        | 0        | 0.003189 | 0        | 0        |
| 0 | 0 | 0        | 0 | 0        | 0        | 0.000362 | 0        | 0        |
| 0 | 0 | 0        | 0 | 0        | 0        | 0.000394 | 0        | 0        |

|   |   |          |   |          |          |          |   |   |
|---|---|----------|---|----------|----------|----------|---|---|
| 0 | 0 | 0        | 0 | 0        | 0.000394 | 0        | 0 |   |
| 0 | 0 | 0.000362 | 0 | 3.29E-05 | 0        | 0.004011 | 0 | 0 |
| 0 | 0 | 3.29E-05 | 0 | 0        | 0        | 0.001315 | 0 | 0 |
| 0 | 0 | 0        | 0 | 0        | 0        | 0.000362 | 0 | 0 |
| 0 | 0 | 3.29E-05 | 0 | 0        | 0        | 0.008876 | 0 | 0 |
| 0 | 0 | 0        | 0 | 0        | 0        | 0.006608 | 0 | 0 |
| 0 | 0 | 0        | 0 | 3.29E-05 | 0        | 0.002104 | 0 | 0 |
| 0 | 0 | 0        | 0 | 0        | 0        | 0.001874 | 0 | 0 |
| 0 | 0 | 0        | 0 | 0        | 0        | 0.003189 | 0 | 0 |
| 0 | 0 | 0        | 0 | 0        | 0        | 0.008219 | 0 | 0 |
| 0 | 0 | 0        | 0 | 0        | 0        | 0.009632 | 0 | 0 |
| 0 | 0 | 0        | 0 | 6.57E-05 | 0        | 0.004734 | 0 | 0 |
| 0 | 0 | 0        | 0 | 0        | 0        | 0.026365 | 0 | 0 |
| 0 | 0 | 0.000164 | 0 | 0        | 0        | 0.002663 | 0 | 0 |
| 0 | 0 | 0        | 0 | 0        | 0        | 0.000756 | 0 | 0 |
| 0 | 0 | 3.29E-05 | 0 | 0        | 0        | 3.29E-05 | 0 | 0 |
| 0 | 0 | 0        | 0 | 0        | 0        | 6.57E-05 | 0 | 0 |
| 0 | 0 | 0        | 0 | 0        | 0        | 0        | 0 | 0 |
| 0 | 0 | 0        | 0 | 0        | 0        | 0        | 0 | 0 |
| 0 | 0 | 6.57E-05 | 0 | 0        | 0        | 6.57E-05 | 0 | 0 |
| 0 | 0 | 0        | 0 | 0        | 0        | 0.000164 | 0 | 0 |
| 0 | 0 | 0        | 0 | 0        | 0        | 6.57E-05 | 0 | 0 |
| 0 | 0 | 6.57E-05 | 0 | 0        | 0        | 0.000131 | 0 | 0 |
| 0 | 0 | 0        | 0 | 0        | 0        | 9.86E-05 | 0 | 0 |
| 0 | 0 | 0.000197 | 0 | 0        | 0        | 9.86E-05 | 0 | 0 |
| 0 | 0 | 0        | 0 | 0        | 0        | 0.280976 | 0 | 0 |
| 0 | 0 | 0        | 0 | 0        | 0        | 0.035438 | 0 | 0 |
| 0 | 0 | 3.29E-05 | 0 | 0        | 0        | 0.001315 | 0 | 0 |
| 0 | 0 | 0        | 0 | 0        | 0        | 0.009172 | 0 | 0 |
| 0 | 0 | 0        | 0 | 0        | 0        | 0.046353 | 0 | 0 |
| 0 | 0 | 0        | 0 | 0        | 0        | 0.008251 | 0 | 0 |
| 0 | 0 | 0        | 0 | 0        | 0        | 0.003156 | 0 | 0 |
| 0 | 0 | 0        | 0 | 0        | 0        | 0.002893 | 0 | 0 |
| 0 | 0 | 6.57E-05 | 0 | 0        | 0        | 0.089549 | 0 | 0 |
| 0 | 0 | 0        | 0 | 0        | 0        | 0.002071 | 0 | 0 |
| 0 | 0 | 0        | 0 | 3.29E-05 | 0        | 0.002531 | 0 | 0 |
| 0 | 0 | 3.29E-05 | 0 | 3.29E-05 | 0        | 0.000822 | 0 | 0 |
| 0 | 0 | 0        | 0 | 3.29E-05 | 0        | 0.000164 | 0 | 0 |
| 0 | 0 | 0.000164 | 0 | 0        | 0        | 0.001512 | 0 | 0 |
| 0 | 0 | 0        | 0 | 0        | 0        | 0.001874 | 0 | 0 |
| 0 | 0 | 0        | 0 | 0        | 0        | 0.00046  | 0 | 0 |
| 0 | 0 | 0        | 0 | 0        | 0        | 0.004307 | 0 | 0 |
| 0 | 0 | 0        | 0 | 0        | 0        | 0.000756 | 0 | 0 |
| 0 | 0 | 3.29E-05 | 0 | 0        | 0        | 0.021894 | 0 | 0 |
| 0 | 0 | 9.86E-05 | 0 | 0        | 0        | 0.001841 | 0 | 0 |
| 0 | 0 | 0        | 0 | 0        | 0        | 0.001808 | 0 | 0 |
| 0 | 0 | 0        | 0 | 0        | 0        | 0.005852 | 0 | 0 |

|   |   |          |   |          |          |          |   |   |
|---|---|----------|---|----------|----------|----------|---|---|
| 0 | 0 | 0        | 0 | 0        | 0        | 0.010848 | 0 | 0 |
| 0 | 0 | 0        | 0 | 0        | 0        | 0.004602 | 0 | 0 |
| 0 | 0 | 0        | 0 | 0        | 0        | 0.008021 | 0 | 0 |
| 0 | 0 | 9.86E-05 | 0 | 9.86E-05 | 0        | 0.004011 | 0 | 0 |
| 0 | 0 | 0        | 0 | 0        | 0        | 0.006147 | 0 | 0 |
| 0 | 0 | 0        | 0 | 0        | 9.86E-05 | 0.00194  | 0 | 0 |
| 0 | 0 | 3.29E-05 | 0 | 0        | 6.57E-05 | 0.002893 | 0 | 0 |
| 0 | 0 | 0        | 0 | 0        | 0.000362 | 0.003583 | 0 | 0 |
| 0 | 0 | 3.29E-05 | 0 | 3.29E-05 | 3.29E-05 | 0.001183 | 0 | 0 |
| 0 | 0 | 0        | 0 | 0        | 0.000164 | 0.001907 | 0 | 0 |
| 0 | 0 | 0        | 0 | 0        | 0        | 0.000329 | 0 | 0 |
| 0 | 0 | 0        | 0 | 6.57E-05 | 3.29E-05 | 3.29E-05 | 0 | 0 |
| 0 | 0 | 0        | 0 | 3.29E-05 | 0        | 0.005358 | 0 | 0 |
| 0 | 0 | 0.001019 | 0 | 0        | 0        | 0.007923 | 0 | 0 |
| 0 | 0 | 0        | 0 | 0        | 0        | 3.29E-05 | 0 | 0 |
| 0 | 0 | 0        | 0 | 0        | 0        | 0.000131 | 0 | 0 |
| 0 | 0 | 0        | 0 | 0        | 0        | 9.86E-05 | 0 | 0 |
| 0 | 0 | 0        | 0 | 0        | 0        | 6.57E-05 | 0 | 0 |
| 0 | 0 | 0        | 0 | 0        | 0        | 3.29E-05 | 0 | 0 |
| 0 | 0 | 0        | 0 | 0        | 0        | 0.000197 | 0 | 0 |
| 0 | 0 | 0        | 0 | 0        | 0        | 0.000131 | 0 | 0 |
| 0 | 0 | 3.29E-05 | 0 | 0        | 0        | 0.000362 | 0 | 0 |
| 0 | 0 | 0        | 0 | 0        | 0        | 0.00023  | 0 | 0 |

| k_Bacteri |
|-----------|-----------|-----------|-----------|-----------|-----------|-----------|-----------|-----------|
| 0         | 0         | 0         | 0.13005   | 0.00023   | 0         | 0.000427  | 0         | 0         |
| 0         | 0         | 0         | 0.081331  | 0.000855  | 0         | 0.000855  | 0         | 3.29E-05  |
| 0         | 0         | 0         | 0.09333   | 9.86E-05  | 0         | 0         | 0         | 0         |
| 0         | 0         | 0         | 0.061869  | 0.000296  | 0         | 0.002005  | 0         | 0         |
| 0         | 0         | 0         | 0.127486  | 3.29E-05  | 0         | 0.000263  | 0         | 0         |
| 0         | 0         | 0         | 0.919261  | 0         | 0         | 0         | 0         | 0         |
| 0         | 0         | 0         | 0.268484  | 0.003452  | 0         | 0.001052  | 0         | 0         |
| 0         | 0         | 0         | 0.01933   | 0.000263  | 0         | 0.000362  | 0         | 0         |
| 0         | 0         | 0         | 0.160821  | 0.003813  | 0         | 0.012065  | 0         | 0         |
| 0         | 0         | 0         | 0.560078  | 6.57E-05  | 0         | 0.000197  | 0         | 3.29E-05  |
| 0         | 0         | 3.29E-05  | 0.918045  | 0.000592  | 0         | 0.00069   | 0         | 3.29E-05  |
| 0         | 0         | 0         | 0.006246  | 0.000263  | 0         | 0.000723  | 0         | 0.000131  |
| 0         | 0         | 0         | 0.035274  | 0.020744  | 0         | 0.029324  | 0         | 0.000131  |
| 0         | 0         | 0         | 0.036523  | 0.004471  | 0         | 0.005687  | 0         | 0.001446  |
| 0         | 0         | 0         | 0.823531  | 0.002794  | 0         | 0.001479  | 0         | 0.00069   |
| 0         | 0         | 0         | 0.073737  | 9.86E-05  | 0         | 0.002696  | 0         | 0         |
| 0         | 0         | 0         | 0.067458  | 0.003748  | 0         | 0.039679  | 0         | 0         |
| 0         | 0         | 0         | 0.181203  | 0.000131  | 0         | 0.000296  | 0         | 0         |
| 0         | 0         | 0         | 0.015615  | 0.000164  | 0         | 0.000131  | 0         | 3.29E-05  |
| 0         | 0         | 0         | 0.009534  | 0.000329  | 0         | 0.001545  | 0         | 9.86E-05  |
| 0         | 0         | 0         | 0.076268  | 0.003189  | 0         | 0.002926  | 0         | 0.00069   |
| 0         | 0.000329  | 0         | 0.322003  | 0.000657  | 0         | 0.000657  | 0         | 0         |
| 0         | 0         | 0         | 0.068214  | 0.001381  | 0         | 0.001414  | 0         | 6.57E-05  |
| 0         | 6.57E-05  | 0         | 0.125251  | 0         | 0         | 0         | 0         | 0         |
| 0         | 0.000164  | 0         | 0.084224  | 0         | 0         | 0         | 0         | 0         |
| 0         | 0         | 0         | 0.045991  | 3.29E-05  | 0         | 0         | 0         | 0         |
| 0         | 6.57E-05  | 0         | 0.125974  | 0.000493  | 0         | 0.000362  | 0         | 0         |
| 0         | 0         | 0         | 0.264834  | 0         | 0         | 3.29E-05  | 0         | 0         |
| 0         | 0.000131  | 0         | 0.206253  | 0.000592  | 0         | 0.000657  | 0         | 0.000131  |
| 0         | 0         | 0         | 0.304251  | 0.000329  | 0         | 0.001183  | 0         | 0         |
| 0         | 3.29E-05  | 0         | 0.238272  | 6.57E-05  | 0         | 9.86E-05  | 0         | 0         |
| 0         | 0         | 3.29E-05  | 0.248726  | 0.001315  | 0         | 0.001085  | 0         | 0         |
| 0         | 0         | 3.29E-05  | 0.143594  | 0.000723  | 0         | 0.004734  | 0         | 0.000263  |
| 0         | 0         | 0         | 0.082711  | 3.29E-05  | 0         | 0.000131  | 0         | 0         |
| 0         | 0         | 0         | 0.213255  | 0.00046   | 0         | 0.000329  | 0         | 0.000362  |
| 0         | 3.29E-05  | 0         | 0.067622  | 0         | 0         | 9.86E-05  | 0         | 0         |
| 0         | 0         | 0         | 0.124034  | 0.001118  | 0         | 0.001512  | 0         | 0.000131  |
| 0         | 0         | 0         | 0.155166  | 0         | 0         | 0.002729  | 0         | 0         |
| 0         | 3.29E-05  | 0         | 0.089747  | 0         | 0         | 0         | 0         | 0         |
| 0         | 0         | 0.000197  | 0.236102  | 0         | 0         | 0         | 0         | 0         |
| 0         | 0         | 0         | 0.094776  | 3.29E-05  | 0         | 0.000625  | 0         | 0         |
| 0         | 0         | 0         | 0.072981  | 0.000756  | 0         | 0.000329  | 0         | 0         |
| 0         | 0         | 0         | 0.159078  | 0.001775  | 0         | 0.006575  | 0         | 0         |
| 0         | 0         | 0         | 0.01887   | 6.57E-05  | 0         | 0         | 0         | 0         |

|   |          |          |          |          |   |          |   |          |
|---|----------|----------|----------|----------|---|----------|---|----------|
| 0 | 0        | 0        | 0.178244 | 0        | 0 | 0.000164 | 0 | 0        |
| 0 | 3.29E-05 | 0        | 0.108583 | 0.000197 | 0 | 0.00069  | 0 | 0        |
| 0 | 0        | 0        | 0.563529 | 0.000394 | 0 | 0.000559 | 0 | 0        |
| 0 | 0        | 0        | 0.042704 | 0.000296 | 0 | 0.001512 | 0 | 0        |
| 0 | 0        | 0        | 0.093856 | 0        | 0 | 0        | 0 | 0        |
| 0 | 0        | 0        | 0.013248 | 0        | 0 | 0        | 0 | 0        |
| 0 | 0        | 0        | 0.007134 | 0        | 0 | 0.000296 | 0 | 0        |
| 0 | 9.86E-05 | 0        | 0.197475 | 3.29E-05 | 0 | 0.000131 | 0 | 0        |
| 0 | 0        | 0        | 0.142181 | 3.29E-05 | 0 | 0        | 0 | 0        |
| 0 | 0        | 0        | 0.078175 | 0        | 0 | 0        | 0 | 0        |
| 0 | 3.29E-05 | 0        | 0.283573 | 0.020513 | 0 | 0.009764 | 0 | 0.000789 |
| 0 | 0        | 0        | 0.267497 | 0        | 0 | 0.001019 | 0 | 0        |
| 0 | 0        | 0        | 0.175252 | 0.000526 | 0 | 0.001085 | 0 | 0        |
| 0 | 0        | 0        | 0.183142 | 0.00092  | 0 | 0.001249 | 0 | 0        |
| 0 | 0.00023  | 0        | 0.246096 | 0        | 0 | 0        | 0 | 0        |
| 0 | 0        | 0.001348 | 0.157697 | 0        | 0 | 0.002203 | 0 | 0        |
| 0 | 0        | 0        | 0.064894 | 0        | 0 | 3.29E-05 | 0 | 0        |
| 0 | 0        | 3.29E-05 | 0.341793 | 3.29E-05 | 0 | 0.00023  | 0 | 0        |
| 0 | 3.29E-05 | 0.000164 | 0.220257 | 0        | 0 | 3.29E-05 | 0 | 0        |
| 0 | 0        | 0        | 0.113449 | 0.000394 | 0 | 0.000953 | 0 | 0        |
| 0 | 0        | 0        | 0.322825 | 0.003912 | 0 | 0.006805 | 0 | 0.001808 |
| 0 | 0        | 0        | 0.803182 | 0        | 0 | 3.29E-05 | 0 | 0        |
| 0 | 0        | 0        | 0.33627  | 3.29E-05 | 0 | 3.29E-05 | 0 | 0        |
| 0 | 0        | 0        | 0.038167 | 3.29E-05 | 0 | 9.86E-05 | 0 | 0        |
| 0 | 0        | 0        | 0.082153 | 0.001183 | 0 | 0.001775 | 0 | 0.00023  |
| 0 | 0        | 0        | 0.026069 | 0        | 0 | 9.86E-05 | 0 | 0        |
| 0 | 0        | 0        | 0.159308 | 0.001118 | 0 | 0.035274 | 0 | 9.86E-05 |
| 0 | 0        | 0        | 0.005983 | 0.000329 | 0 | 0.015549 | 0 | 0        |
| 0 | 0        | 0.001709 | 0.072849 | 0.000953 | 0 | 0.000789 | 0 | 0.000131 |
| 0 | 0        | 0        | 0.035307 | 0        | 0 | 0        | 0 | 0        |
| 0 | 0        | 0        | 0.25895  | 9.86E-05 | 0 | 0.000131 | 0 | 0        |
| 0 | 0.00023  | 0.000362 | 0.193991 | 0.000329 | 0 | 0.000296 | 0 | 0        |
| 0 | 3.29E-05 | 0        | 0.179559 | 0.001775 | 0 | 0.001118 | 0 | 9.86E-05 |
| 0 | 9.86E-05 | 0.000131 | 0.133568 | 0        | 0 | 0        | 0 | 0        |
| 0 | 0        | 0        | 0.153753 | 0.00046  | 0 | 0.000592 | 0 | 0        |
| 0 | 0        | 0        | 0.128078 | 0.000164 | 0 | 0.001151 | 0 | 0        |
| 0 | 0        | 0.004931 | 0.171899 | 0.00092  | 0 | 0.003222 | 0 | 0        |
| 0 | 0        | 0        | 0.185213 | 0.072948 | 0 | 0.064203 | 0 | 0.007824 |
| 0 | 0        | 0        | 0.128012 | 0.000493 | 0 | 0.004372 | 0 | 0        |
| 0 | 0        | 0        | 0.138532 | 0.001841 | 0 | 0.003912 | 0 | 9.86E-05 |
| 0 | 0.000329 | 0        | 0.119432 | 0.002729 | 0 | 0.001742 | 0 | 0.000131 |
| 0 | 0.000131 | 0        | 0.146224 | 0.00046  | 0 | 0.000362 | 0 | 0.000131 |
| 0 | 0        | 0        | 0.09905  | 0.000197 | 0 | 0.001381 | 0 | 9.86E-05 |
| 0 | 0        | 0.000526 | 0.354976 | 0.047043 | 0 | 0.038529 | 0 | 0.006575 |
| 0 | 0        | 0        | 0.592755 | 0        | 0 | 0.027088 | 0 | 0        |
| 0 | 0        | 0        | 0.199579 | 0.000888 | 0 | 0.000625 | 0 | 0.000329 |
| 0 | 6.57E-05 | 0        | 0.417469 | 0        | 0 | 0.00023  | 0 | 0        |

|   |          |          |          |          |   |          |   |          |
|---|----------|----------|----------|----------|---|----------|---|----------|
| 0 | 0        | 0        | 0.30573  | 3.29E-05 | 0 | 0.000657 | 0 | 0        |
| 0 | 6.57E-05 | 0        | 0.187613 | 0        | 0 | 0.000625 | 0 | 0        |
| 0 | 6.57E-05 | 0        | 0.154246 | 0        | 0 | 0.00092  | 0 | 0        |
| 0 | 0        | 0        | 0.146586 | 0.000362 | 0 | 0.00092  | 0 | 0        |
| 0 | 0        | 0        | 0.083632 | 0        | 0 | 0.001249 | 0 | 0        |
| 0 | 0        | 0        | 0.240705 | 0.000164 | 0 | 0.000526 | 0 | 3.29E-05 |
| 0 | 0        | 0        | 0.084783 | 0        | 0 | 6.57E-05 | 0 | 0        |
| 0 | 0        | 0        | 0.17831  | 0        | 0 | 0        | 0 | 0        |
| 0 | 0        | 0        | 0.295375 | 3.29E-05 | 0 | 0        | 0 | 0        |
| 0 | 0        | 0        | 0.302278 | 3.29E-05 | 0 | 0.000296 | 0 | 0        |
| 0 | 0        | 0        | 0.142871 | 0.00023  | 0 | 0.000362 | 0 | 6.57E-05 |
| 0 | 0        | 0        | 0.083073 | 0        | 0 | 0.000362 | 0 | 0        |
| 0 | 0        | 0        | 0.339139 | 0.016574 | 0 | 0.006953 | 0 | 0.00316  |
| 0 | 0        | 0        | 0.173181 | 0.001578 | 0 | 0.002071 | 0 | 0        |
| 0 | 0        | 0        | 0.048785 | 0.00069  | 0 | 0.000592 | 0 | 0.000592 |
| 0 | 0        | 0        | 0.012262 | 0.001808 | 0 | 0.003123 | 0 | 0.000493 |
| 0 | 0        | 0        | 0.033039 | 0        | 0 | 0.01098  | 0 | 0.000296 |
| 0 | 0        | 0        | 0.036326 | 6.57E-05 | 0 | 0.000723 | 0 | 0        |
| 0 | 0        | 0        | 0.003715 | 3.29E-05 | 0 | 0        | 0 | 0        |
| 0 | 0        | 0        | 0.024656 | 0.00092  | 0 | 0.005293 | 0 | 0        |
| 0 | 0        | 0        | 0.10671  | 0        | 0 | 0.006739 | 0 | 3.29E-05 |
| 0 | 0        | 0        | 0.153588 | 0.000855 | 0 | 0.000986 | 0 | 0        |
| 0 | 0        | 0        | 0.738091 | 0.000197 | 0 | 0.000164 | 0 | 0.000131 |
| 0 | 0        | 0        | 0.101548 | 0.000131 | 0 | 3.29E-05 | 0 | 0        |
| 0 | 0        | 0        | 0.502285 | 9.86E-05 | 0 | 0.00023  | 0 | 0.000131 |
| 0 | 0.00023  | 0        | 0.200237 | 0        | 0 | 6.57E-05 | 0 | 0        |
| 0 | 0        | 0        | 0.028239 | 0        | 0 | 0.000526 | 0 | 0        |
| 0 | 0        | 0        | 0.061771 | 0        | 0 | 0        | 0 | 0        |
| 0 | 0        | 0        | 0.004635 | 0        | 0 | 9.86E-05 | 0 | 0        |
| 0 | 0        | 0        | 0.205168 | 0.00023  | 0 | 0.00046  | 0 | 0        |
| 0 | 0        | 0        | 0.149676 | 0        | 0 | 6.57E-05 | 0 | 0        |
| 0 | 3.29E-05 | 0        | 0.188895 | 0        | 0 | 0.000855 | 0 | 0        |
| 0 | 0.000197 | 0        | 0.44538  | 0.000263 | 0 | 0.000625 | 0 | 6.57E-05 |
| 0 | 0        | 0        | 0.170814 | 0.000197 | 0 | 0.000263 | 0 | 0.000131 |
| 0 | 0        | 0.000131 | 0.208587 | 0.000296 | 0 | 0.000526 | 0 | 0        |
| 0 | 0        | 0        | 0.419573 | 0        | 0 | 3.29E-05 | 0 | 0        |
| 0 | 0        | 0        | 0.06828  | 0.00023  | 0 | 0.000164 | 0 | 0        |
| 0 | 0        | 0        | 0.028995 | 0        | 0 | 0.000131 | 0 | 0        |
| 0 | 0        | 0        | 0.093264 | 9.86E-05 | 0 | 0.000164 | 0 | 0        |
| 0 | 9.86E-05 | 0        | 0.117788 | 0        | 0 | 0.000625 | 0 | 0        |
| 0 | 0        | 0        | 0.13988  | 0.000657 | 0 | 0.006312 | 0 | 0        |
| 0 | 0        | 0        | 0.084224 | 0.00457  | 0 | 0.005424 | 0 | 0.000362 |
| 0 | 0        | 3.29E-05 | 0.036359 | 0        | 0 | 3.29E-05 | 0 | 0        |
| 0 | 0        | 0        | 0.10763  | 0        | 0 | 3.29E-05 | 0 | 3.29E-05 |
| 0 | 0        | 0        | 0.174661 | 0.000855 | 0 | 0.000394 | 0 | 0        |
| 0 | 0        | 0        | 0.15944  | 6.57E-05 | 0 | 0.000263 | 0 | 0        |
| 0 | 0        | 6.57E-05 | 0.378744 | 0.00023  | 0 | 0.00286  | 0 | 0        |

|   |          |          |          |          |   |          |   |          |
|---|----------|----------|----------|----------|---|----------|---|----------|
| 0 | 0        | 0        | 0.108649 | 0        | 0 | 0.001381 | 0 | 0        |
| 0 | 0        | 0        | 0.435813 | 0        | 0 | 0        | 0 | 0        |
| 0 | 3.29E-05 | 0        | 0.427562 | 3.29E-05 | 0 | 9.86E-05 | 0 | 3.29E-05 |
| 0 | 9.86E-05 | 0        | 0.646865 | 0        | 0 | 0        | 0 | 0        |
| 0 | 0        | 0        | 0.098787 | 0        | 0 | 0.00023  | 0 | 0        |
| 0 | 0        | 0        | 0.07114  | 0.00023  | 0 | 0.000263 | 0 | 3.29E-05 |
| 0 | 0        | 0        | 0.098951 | 0.000131 | 0 | 0.000131 | 0 | 0        |
| 0 | 0        | 0        | 0.074197 | 0.00092  | 0 | 0.001019 | 0 | 3.29E-05 |
| 0 | 0        | 9.86E-05 | 0.111739 | 6.57E-05 | 0 | 0.00023  | 0 | 3.29E-05 |
| 0 | 0        | 0        | 0.15773  | 0        | 0 | 0        | 0 | 3.29E-05 |
| 0 | 0        | 0        | 0.064795 | 3.29E-05 | 0 | 0        | 0 | 0        |
| 0 | 0        | 0        | 0.101417 | 0.047207 | 0 | 0.043295 | 0 | 0.005852 |
| 0 | 0        | 0        | 0.289589 | 0        | 0 | 0        | 0 | 0.000197 |
| 0 | 6.57E-05 | 6.57E-05 | 0.222624 | 0.001874 | 0 | 0.002761 | 0 | 0.000559 |
| 0 | 0        | 0        | 0.231369 | 0.006115 | 0 | 0.004602 | 0 | 0.000164 |
| 0 | 0        | 0        | 0.082547 | 0        | 0 | 0.000197 | 0 | 3.29E-05 |
| 0 | 0        | 0        | 0.300733 | 3.29E-05 | 0 | 0        | 0 | 0        |
| 0 | 0        | 0        | 0.066636 | 3.29E-05 | 0 | 0.000427 | 0 | 0        |
| 0 | 0        | 0        | 0.137743 | 0.000329 | 0 | 0.002038 | 0 | 0        |
| 0 | 0        | 0        | 0.228541 | 0.000263 | 0 | 0.006049 | 0 | 0        |
| 0 | 0        | 0        | 0.210592 | 0.001742 | 0 | 0.016766 | 0 | 0.000625 |
| 0 | 0        | 0        | 0.319044 | 0.000427 | 0 | 0.000263 | 0 | 0        |
| 0 | 0.001545 | 0        | 0.494461 | 0.001282 | 0 | 0.001052 | 0 | 0.000493 |
| 0 | 0        | 0        | 0.098655 | 9.86E-05 | 0 | 0.001183 | 0 | 0        |
| 0 | 0        | 0        | 0.077024 | 0.001085 | 0 | 0.001085 | 0 | 3.29E-05 |
| 0 | 0        | 0        | 0.78497  | 0.003057 | 0 | 0.005391 | 0 | 0.000329 |
| 0 | 9.86E-05 | 0        | 0.635294 | 0.004833 | 0 | 0.002367 | 0 | 0.000263 |
| 0 | 0        | 0        | 0.119761 | 0.005687 | 0 | 0.00572  | 0 | 0.001841 |
| 0 | 6.57E-05 | 0        | 0.144646 | 0.009172 | 0 | 0.013478 | 0 | 0.000131 |
| 0 | 0        | 0.001808 | 0.238732 | 0.002137 | 0 | 0.000131 | 0 | 0.000625 |
| 0 | 0        | 0        | 0.219632 | 0.001446 | 0 | 0.002992 | 0 | 0.000197 |
| 0 | 0        | 0        | 0.175252 | 0.019166 | 0 | 0.027976 | 0 | 0        |
| 0 | 0        | 0        | 0.163779 | 0.021664 | 0 | 0.021171 | 0 | 0.005917 |
| 0 | 0        | 0.000197 | 0.117459 | 0.002071 | 0 | 0.003419 | 0 | 3.29E-05 |
| 0 | 0        | 0        | 0.155791 | 0.000789 | 0 | 0.001644 | 0 | 0        |
| 0 | 0        | 0        | 0.138137 | 0.005654 | 0 | 0.007824 | 0 | 6.57E-05 |
| 0 | 0        | 0        | 0.198363 | 0        | 0 | 0.000263 | 0 | 0        |
| 0 | 0        | 0        | 0.156251 | 0.001183 | 0 | 0.003649 | 0 | 0        |
| 0 | 0        | 3.29E-05 | 0.107499 | 0.000427 | 0 | 0.000197 | 0 | 0        |
| 0 | 3.29E-05 | 0        | 0.081298 | 0        | 0 | 3.29E-05 | 0 | 0        |
| 0 | 6.57E-05 | 0.000197 | 0.073342 | 9.86E-05 | 0 | 9.86E-05 | 0 | 0        |
| 0 | 0        | 0        | 0.070581 | 0.000592 | 0 | 0.000723 | 0 | 3.29E-05 |
| 0 | 0        | 0        | 0.090404 | 0        | 0 | 0        | 0 | 0        |
| 0 | 0        | 0        | 0.045991 | 0        | 0 | 3.29E-05 | 0 | 0        |
| 0 | 0        | 0        | 0.376705 | 9.86E-05 | 0 | 9.86E-05 | 0 | 0        |
| 0 | 0        | 0        | 0.130938 | 0.000131 | 0 | 9.86E-05 | 0 | 3.29E-05 |
| 0 | 0        | 0        | 0.019823 | 0.00217  | 0 | 0.002761 | 0 | 0.000362 |

|   |          |          |          |          |   |          |   |          |
|---|----------|----------|----------|----------|---|----------|---|----------|
| 0 | 0        | 0        | 0.018212 | 6.57E-05 | 0 | 0        | 0 | 0        |
| 0 | 0        | 0        | 0.012558 | 6.57E-05 | 0 | 0        | 0 | 0        |
| 0 | 0        | 0.000131 | 0.308754 | 0.007068 | 0 | 0.009566 | 0 | 0.001085 |
| 0 | 0        | 0        | 0.008646 | 0        | 0 | 0.000131 | 0 | 0        |
| 0 | 0        | 0        | 0.020185 | 0        | 0 | 0        | 0 | 0        |
| 0 | 0        | 0        | 0.18209  | 0.001841 | 0 | 0.002038 | 0 | 6.57E-05 |
| 0 | 3.29E-05 | 0        | 0.105954 | 0.000329 | 0 | 0.000263 | 0 | 0        |
| 0 | 0        | 0        | 0.31053  | 0.000263 | 0 | 0.000164 | 0 | 0        |
| 0 | 0        | 0        | 0.148131 | 0.000131 | 0 | 0        | 0 | 0        |
| 0 | 3.29E-05 | 0        | 0.378941 | 0        | 0 | 0.000362 | 0 | 0        |
| 0 | 0        | 0        | 0.185575 | 0.001085 | 0 | 0.002663 | 0 | 0.000493 |
| 0 | 0        | 0        | 0.062823 | 0.00069  | 0 | 0.000394 | 0 | 0.000131 |
| 0 | 0        | 0        | 0.045169 | 0.000131 | 0 | 3.29E-05 | 0 | 0        |
| 0 | 0        | 0        | 0.089911 | 0.000263 | 0 | 0.000888 | 0 | 0        |
| 0 | 3.29E-05 | 0        | 0.193037 | 0.001019 | 0 | 0.001249 | 0 | 0.00023  |
| 0 | 6.57E-05 | 0        | 0.124955 | 0.003024 | 0 | 0.004011 | 0 | 0.000822 |
| 0 | 0.000131 | 0        | 0.24442  | 0.002367 | 0 | 0.003649 | 0 | 0.000296 |
| 0 | 0        | 0        | 0.068378 | 0.002992 | 0 | 0.002498 | 0 | 0.000164 |
| 0 | 0        | 0        | 0.250962 | 9.86E-05 | 0 | 0.001446 | 0 | 0        |
| 0 | 0        | 0        | 0.117262 | 0.004438 | 0 | 0.00618  | 0 | 0.000394 |
| 0 | 0        | 0        | 0.179197 | 0.00046  | 0 | 0.002794 | 0 | 0        |
| 0 | 0        | 0.000164 | 0.214077 | 0.00263  | 0 | 0.002827 | 0 | 0.00046  |
| 0 | 3.29E-05 | 0        | 0.299451 | 9.86E-05 | 0 | 9.86E-05 | 0 | 0        |
| 0 | 0        | 0        | 0.186364 | 0        | 0 | 0        | 0 | 0        |
| 0 | 0        | 0        | 0.299977 | 0.001151 | 0 | 0.001644 | 0 | 6.57E-05 |
| 0 | 0        | 0.000131 | 0.23607  | 0.018936 | 0 | 0.012361 | 0 | 0.00309  |
| 0 | 0        | 0        | 0.111279 | 0.00023  | 0 | 0.002071 | 0 | 0        |
| 0 | 0        | 0        | 0.111444 | 0.000592 | 0 | 0.000394 | 0 | 0.000362 |
| 0 | 0        | 3.29E-05 | 0.172129 | 0        | 0 | 9.86E-05 | 0 | 0        |
| 0 | 0        | 0        | 0.506723 | 0.001118 | 0 | 0.000822 | 0 | 0.00023  |
| 0 | 0        | 0.002466 | 0.175877 | 0.000855 | 0 | 0.001183 | 0 | 0        |
| 0 | 0        | 0        | 0.009139 | 3.29E-05 | 0 | 3.29E-05 | 0 | 0        |
| 0 | 0        | 0        | 0.006279 | 0.000197 | 0 | 0.000855 | 0 | 3.29E-05 |
| 0 | 0        | 0        | 0.02459  | 0.000329 | 0 | 0.000986 | 0 | 6.57E-05 |
| 0 | 0        | 0        | 0.090404 | 0.001414 | 0 | 0.002104 | 0 | 0.000164 |
| 0 | 0        | 0        | 0.020776 | 0.000986 | 0 | 0.001479 | 0 | 0.00046  |
| 0 | 0        | 0.11529  | 0.104211 | 0.003024 | 0 | 0.001775 | 0 | 0        |
| 0 | 6.57E-05 | 0        | 0.175482 | 0        | 0 | 0.000362 | 0 | 9.86E-05 |
| 0 | 0        | 3.29E-05 | 0.069792 | 0.000986 | 0 | 0.00092  | 0 | 6.57E-05 |
| 0 | 0        | 0        | 0.069233 | 0        | 0 | 0.00023  | 0 | 0        |
| 0 | 0        | 0        | 0.1265   | 0.000263 | 0 | 0.00217  | 0 | 0        |
| 0 | 0        | 0        | 0.024064 | 0.000526 | 0 | 0.003189 | 0 | 0        |
| 0 | 0        | 0        | 0.161116 | 0.000164 | 0 | 0.000362 | 0 | 0        |
| 0 | 3.29E-05 | 0        | 0.124725 | 6.57E-05 | 0 | 0.000986 | 0 | 0        |
| 0 | 6.57E-05 | 0        | 0.104737 | 0        | 0 | 0.000164 | 0 | 0        |
| 0 | 0        | 0        | 0.095302 | 0.001677 | 0 | 0.028469 | 0 | 0.000427 |
| 0 | 0        | 6.57E-05 | 0.334133 | 0.012295 | 0 | 0.008449 | 0 | 0.00069  |



|   |          |          |          |          |   |          |   |          |
|---|----------|----------|----------|----------|---|----------|---|----------|
| 0 | 0        | 0        | 0.13462  | 0.002959 | 0 | 0.002137 | 0 | 0.000493 |
| 0 | 0        | 0.001972 | 0.333772 | 0.000493 | 0 | 0.003682 | 0 | 0        |
| 0 | 0.000131 | 0        | 0.300536 | 0        | 0 | 0.004011 | 0 | 0        |
| 0 | 0        | 0        | 0.189191 | 3.29E-05 | 0 | 0.000197 | 0 | 0        |
| 0 | 0        | 0.003024 | 0.089418 | 0.003255 | 0 | 0.010191 | 0 | 0        |
| 0 | 0        | 0        | 0.072389 | 0.007627 | 0 | 0.005589 | 0 | 0.00092  |
| 0 | 0        | 0        | 0.210329 | 0        | 0 | 0.002531 | 0 | 9.86E-05 |
| 0 | 0        | 0        | 0.07206  | 0.002893 | 0 | 0.003813 | 0 | 0.000855 |
| 0 | 0        | 6.57E-05 | 0.177981 | 0        | 0 | 0        | 0 | 0        |
| 0 | 0        | 0        | 0.13291  | 0.00092  | 0 | 0.00092  | 0 | 3.29E-05 |
| 0 | 0        | 3.29E-05 | 0.045958 | 0.003583 | 0 | 0.001677 | 0 | 0        |
| 0 | 0        | 0        | 0.089122 | 0.002334 | 0 | 0.00549  | 0 | 0        |
| 0 | 0        | 0        | 0.042342 | 0.015122 | 0 | 0.011144 | 0 | 0.001972 |
| 0 | 0        | 0        | 0.028568 | 0.002466 | 0 | 0.003518 | 0 | 0        |
| 0 | 0        | 0        | 0.221835 | 0.000394 | 0 | 0.001709 | 0 | 0        |
| 0 | 0.000296 | 0        | 0.189947 | 0.00023  | 0 | 0.000263 | 0 | 0        |
| 0 | 0        | 0        | 0.456195 | 0        | 0 | 0        | 0 | 0        |
| 0 | 0        | 0        | 0.650876 | 0.000164 | 0 | 0.000164 | 0 | 0        |
| 0 | 0        | 0        | 0.436306 | 3.29E-05 | 0 | 9.86E-05 | 0 | 0        |
| 0 | 6.57E-05 | 0        | 0.268582 | 0        | 0 | 0        | 0 | 0        |
| 0 | 0        | 0        | 0.216937 | 0        | 0 | 0        | 0 | 0        |
| 0 | 3.29E-05 | 0        | 0.559058 | 0        | 0 | 3.29E-05 | 0 | 0        |
| 0 | 0        | 0        | 0.776225 | 0.000329 | 0 | 0.00046  | 0 | 0.000164 |
| 0 | 0        | 0.000131 | 0.099477 | 0.00069  | 0 | 0.001183 | 0 | 0        |
| 0 | 0        | 0        | 0.006805 | 0.000131 | 0 | 0.000394 | 0 | 9.86E-05 |
| 0 | 0        | 0        | 0.004076 | 0.000789 | 0 | 0.001151 | 0 | 0.000197 |
| 0 | 0        | 0        | 0.001709 | 0.000197 | 0 | 6.57E-05 | 0 | 3.29E-05 |
| 0 | 0        | 0        | 0.001348 | 0        | 0 | 0        | 0 | 0        |
| 0 | 0        | 0        | 0.058943 | 0.001085 | 0 | 0.001315 | 0 | 0.000164 |
| 0 | 0        | 0        | 0.001183 | 0        | 0 | 3.29E-05 | 0 | 0        |
| 0 | 0        | 3.29E-05 | 0.00457  | 0.000296 | 0 | 0.000263 | 0 | 9.86E-05 |
| 0 | 0        | 0        | 0.000164 | 6.57E-05 | 0 | 0.00023  | 0 | 0        |
| 0 | 0.000164 | 0        | 0.161741 | 0.001118 | 0 | 0.001446 | 0 | 3.29E-05 |
| 0 | 0        | 0        | 0.170387 | 6.57E-05 | 0 | 0.00023  | 0 | 0        |
| 0 | 0        | 0        | 0.183734 | 0.000296 | 0 | 0.000822 | 0 | 0.000296 |
| 0 | 0        | 0        | 0.183569 | 0.002005 | 0 | 0.001414 | 0 | 0.00046  |
| 0 | 0        | 0        | 0.112956 | 0.003879 | 0 | 0.003583 | 0 | 0.000723 |
| 0 | 0        | 0        | 0.111049 | 0.000888 | 0 | 0.00046  | 0 | 0        |
| 0 | 0        | 0        | 0.176206 | 0.000789 | 0 | 0.003781 | 0 | 3.29E-05 |
| 0 | 0        | 0        | 0.11003  | 0.000723 | 0 | 0.001545 | 0 | 0.000131 |
| 0 | 0        | 0        | 0.25987  | 0        | 0 | 0        | 0 | 0        |
| 0 | 0        | 0        | 0.107531 | 0.000131 | 0 | 0.001085 | 0 | 0.000131 |
| 0 | 0        | 0        | 0.175745 | 0        | 0 | 0.001611 | 0 | 0        |
| 0 | 0        | 0        | 0.042046 | 9.86E-05 | 0 | 0.000953 | 0 | 0.000263 |
| 0 | 0        | 0        | 0.040863 | 0.000559 | 0 | 0.002367 | 0 | 9.86E-05 |
| 0 | 0        | 0        | 0.073309 | 0        | 0 | 0.000526 | 0 | 0        |
| 0 | 0        | 0        | 0.046616 | 0        | 0 | 0.00046  | 0 | 0.000164 |

|   |          |          |          |          |   |          |   |          |
|---|----------|----------|----------|----------|---|----------|---|----------|
| 0 | 6.57E-05 | 0        | 0.228443 | 0.001381 | 0 | 0.002466 | 0 | 0        |
| 0 | 0        | 0        | 0.095565 | 0.000197 | 0 | 0.001151 | 0 | 0        |
| 0 | 0        | 0        | 0.040337 | 0.000822 | 0 | 0.000394 | 0 | 6.57E-05 |
| 0 | 0        | 0.005194 | 0.133535 | 3.29E-05 | 0 | 0.004372 | 0 | 0        |
| 0 | 0        | 0        | 0.022979 | 0.000131 | 0 | 0.000559 | 0 | 0        |
| 0 | 0        | 0        | 0.161149 | 0.001315 | 0 | 0.001972 | 0 | 9.86E-05 |
| 0 | 0        | 0        | 0.053223 | 0.001611 | 0 | 0.001808 | 0 | 0        |
| 0 | 0        | 0        | 0.107367 | 0.000756 | 0 | 0.000888 | 0 | 9.86E-05 |
| 0 | 0        | 0        | 0.100792 | 0.002301 | 0 | 0.002761 | 0 | 9.86E-05 |
| 0 | 0        | 3.29E-05 | 0.164864 | 0        | 0 | 0.00023  | 0 | 0        |
| 0 | 0        | 0        | 0.028929 | 0.000362 | 0 | 0.000657 | 0 | 0        |
| 0 | 6.57E-05 | 0        | 0.026727 | 0.000296 | 0 | 0.000362 | 0 | 0.000197 |
| 0 | 3.29E-05 | 0        | 0.271344 | 9.86E-05 | 0 | 0.000526 | 0 | 0        |
| 0 | 6.57E-05 | 0        | 0.133371 | 0        | 0 | 0.000362 | 0 | 0        |
| 0 | 0        | 0        | 0.0239   | 6.57E-05 | 0 | 0.00046  | 0 | 0        |
| 0 | 0        | 0        | 0.052007 | 0.000559 | 0 | 0.001151 | 0 | 6.57E-05 |
| 0 | 0        | 0        | 0.006706 | 0.002005 | 0 | 0.005095 | 0 | 6.57E-05 |
| 0 | 0        | 0        | 0.103882 | 6.57E-05 | 0 | 0.000197 | 0 | 0        |
| 0 | 0        | 0        | 0.096814 | 0        | 0 | 0        | 0 | 0        |
| 0 | 0        | 0        | 0.029455 | 0        | 0 | 3.29E-05 | 0 | 0        |
| 0 | 0        | 0        | 0.007956 | 6.57E-05 | 0 | 0.000197 | 0 | 0        |
| 0 | 0        | 0        | 0.018475 | 0        | 0 | 0        | 0 | 0        |
| 0 | 0        | 0        | 0.039613 | 0.000756 | 0 | 0.000625 | 0 | 0.000131 |
| 0 | 0        | 0        | 0.027812 | 0.000362 | 0 | 0.000526 | 0 | 0        |
| 0 | 0        | 0        | 0.000625 | 0        | 0 | 0.000329 | 0 | 0        |
| 0 | 0        | 0        | 0.001841 | 0.000131 | 0 | 0.000164 | 0 | 0        |
| 0 | 0        | 0        | 0.002203 | 0        | 0 | 0.00023  | 0 | 0        |
| 0 | 0        | 0        | 0.015977 | 0        | 0 | 0.00023  | 0 | 3.29E-05 |
| 0 | 0        | 0        | 0.024623 | 6.57E-05 | 0 | 3.29E-05 | 0 | 0.000164 |
| 0 | 0        | 0        | 0.003386 | 0.000362 | 0 | 0.00023  | 0 | 3.29E-05 |
| 0 | 0        | 0        | 0.00263  | 6.57E-05 | 0 | 0        | 0 | 0        |
| 0 | 0        | 0        | 0.02551  | 0.003123 | 0 | 0.001742 | 0 | 0.000394 |
| 0 | 0        | 0        | 0.079523 | 0        | 0 | 6.57E-05 | 0 | 0        |
| 0 | 0        | 0        | 0.015089 | 0        | 0 | 0.000888 | 0 | 0        |
| 0 | 0        | 0        | 0.007397 | 3.29E-05 | 0 | 0.000362 | 0 | 0        |
| 0 | 0        | 0        | 0.002104 | 0.000855 | 0 | 0.000493 | 0 | 9.86E-05 |
| 0 | 0        | 0        | 0.263487 | 0.015024 | 0 | 0.009303 | 0 | 0.001414 |
| 0 | 0        | 0        | 0.007627 | 0.004438 | 0 | 0.007956 | 0 | 0.000888 |
| 0 | 0        | 0        | 0.337486 | 0.000329 | 0 | 0.000953 | 0 | 0        |
| 0 | 6.57E-05 | 0        | 0.142773 | 0.007462 | 0 | 0.005424 | 0 | 0.000657 |
| 0 | 6.57E-05 | 0        | 0.378185 | 0        | 0 | 0        | 0 | 0        |
| 0 | 9.86E-05 | 0        | 0.184753 | 0        | 0 | 0        | 0 | 0        |
| 0 | 0        | 3.29E-05 | 0.49548  | 0        | 0 | 3.29E-05 | 0 | 0        |
| 0 | 0        | 3.29E-05 | 0.450475 | 0.002104 | 0 | 0.009829 | 0 | 0        |
| 0 | 0        | 0        | 0.138565 | 0.000263 | 0 | 0.000592 | 0 | 0        |
| 0 | 0        | 3.29E-05 | 0.125481 | 0.000493 | 0 | 0.001611 | 0 | 0.000362 |
| 0 | 0        | 0        | 0.357408 | 0.000263 | 0 | 0.000953 | 0 | 0.000296 |

|   |          |          |          |          |   |          |   |          |
|---|----------|----------|----------|----------|---|----------|---|----------|
| 0 | 0        | 0.000657 | 0.124363 | 0.000263 | 0 | 9.86E-05 | 0 | 0        |
| 0 | 0        | 0        | 0.139814 | 0.000131 | 0 | 0.001808 | 0 | 0        |
| 0 | 0        | 0        | 0.257767 | 0.001348 | 0 | 0.002696 | 0 | 3.29E-05 |
| 0 | 6.57E-05 | 0        | 0.202538 | 3.29E-05 | 0 | 0.00023  | 0 | 0.000131 |
| 0 | 0.00023  | 0.000131 | 0.182386 | 0.00023  | 0 | 0.000657 | 0 | 9.86E-05 |
| 0 | 0.000197 | 0        | 0.204149 | 0.000197 | 0 | 0.000197 | 0 | 0        |
| 0 | 3.29E-05 | 6.57E-05 | 0.094349 | 0        | 0 | 0.000526 | 0 | 0        |
| 0 | 0        | 0        | 0.089056 | 0.000164 | 0 | 0.00194  | 0 | 0        |
| 0 | 0        | 0        | 0.124955 | 3.29E-05 | 0 | 3.29E-05 | 0 | 0        |
| 0 | 9.86E-05 | 0.000296 | 0.125086 | 0        | 0 | 3.29E-05 | 0 | 3.29E-05 |
| 0 | 0.000197 | 0        | 0.144449 | 9.86E-05 | 0 | 0.000197 | 0 | 0        |
| 0 | 0        | 0        | 0.944574 | 0        | 0 | 9.86E-05 | 0 | 0        |
| 0 | 3.29E-05 | 0        | 0.102962 | 0        | 0 | 0        | 0 | 0        |
| 0 | 0.000164 | 3.29E-05 | 0.227457 | 0.002893 | 0 | 0.001348 | 0 | 0.000263 |
| 0 | 0        | 0        | 0.101614 | 3.29E-05 | 0 | 0        | 0 | 0        |
| 0 | 0        | 0        | 0.011868 | 0.000756 | 0 | 0.00194  | 0 | 0.000888 |
| 0 | 0        | 0        | 0.119958 | 3.29E-05 | 0 | 0.000296 | 0 | 0        |
| 0 | 0        | 0        | 0.090766 | 3.29E-05 | 0 | 6.57E-05 | 0 | 0        |
| 0 | 0        | 0        | 0.235642 | 0.001019 | 0 | 0.000526 | 0 | 0        |
| 0 | 0        | 3.29E-05 | 0.687465 | 0.001611 | 0 | 0.001315 | 0 | 0.00023  |
| 0 | 0        | 0        | 0.662382 | 0.000526 | 0 | 0.000986 | 0 | 0.000164 |
| 0 | 3.29E-05 | 0        | 0.117821 | 0.000986 | 0 | 0.001216 | 0 | 6.57E-05 |
| 0 | 0        | 0        | 0.045564 | 0.000592 | 0 | 0.003057 | 0 | 0        |
| 0 | 0        | 0        | 0.520859 | 9.86E-05 | 0 | 0.004833 | 0 | 0        |
| 0 | 0        | 0        | 0.644203 | 0        | 0 | 0.000329 | 0 | 0        |
| 0 | 0        | 0        | 0.690522 | 0        | 0 | 0        | 0 | 0        |
| 0 | 0        | 0        | 0.592163 | 6.57E-05 | 0 | 0.000427 | 0 | 6.57E-05 |
| 0 | 0        | 0        | 0.018344 | 0.00046  | 0 | 0.000263 | 0 | 0        |
| 0 | 0        | 0        | 0.067392 | 0.000197 | 0 | 0.000263 | 0 | 0        |
| 0 | 3.29E-05 | 0        | 0.084454 | 0.000822 | 0 | 0.000427 | 0 | 0.000164 |
| 0 | 0        | 0        | 0.044216 | 0        | 0 | 6.57E-05 | 0 | 0        |
| 0 | 0        | 0        | 0.416187 | 0.00023  | 0 | 0.002071 | 0 | 3.29E-05 |
| 0 | 0        | 3.29E-05 | 0.337749 | 0.001249 | 0 | 0.001282 | 0 | 6.57E-05 |
| 0 | 0        | 0        | 0.045005 | 0        | 0 | 3.29E-05 | 0 | 0        |
| 0 | 0        | 0        | 0.057628 | 9.86E-05 | 0 | 0.000164 | 0 | 0        |
| 0 | 0        | 0        | 0.055097 | 0.001282 | 0 | 0.002597 | 0 | 0        |
| 0 | 0        | 0        | 0.124166 | 0.004076 | 0 | 0.001381 | 0 | 0        |
| 0 | 0        | 0.001479 | 0.144088 | 0.000263 | 0 | 0.003419 | 0 | 0        |
| 0 | 0        | 0        | 0.222558 | 3.29E-05 | 0 | 0.000953 | 0 | 0        |
| 0 | 0        | 0        | 0.548177 | 0.00457  | 0 | 0.005161 | 0 | 3.29E-05 |
| 0 | 0.00023  | 3.29E-05 | 0.291167 | 0.001118 | 0 | 0.000986 | 0 | 0.00023  |
| 0 | 0        | 0        | 0.684178 | 0.00069  | 0 | 0.000723 | 0 | 3.29E-05 |
| 0 | 0        | 0.00309  | 0.193432 | 0        | 0 | 0.001907 | 0 | 0        |
| 0 | 0        | 0.001348 | 0.113186 | 0        | 0 | 0.001282 | 0 | 0        |
| 0 | 0        | 0        | 0.096256 | 0.000888 | 0 | 0.000723 | 0 | 0.000197 |
| 0 | 0        | 0        | 0.559782 | 0.011703 | 0 | 0.016733 | 0 | 0        |
| 0 | 0        | 0        | 0.237582 | 0.022848 | 0 | 0.013709 | 0 | 0.002104 |

|   |          |          |          |          |          |          |   |          |
|---|----------|----------|----------|----------|----------|----------|---|----------|
| 0 | 0        | 0.006115 | 0.823564 | 0        | 0        | 0.00023  | 0 | 0        |
| 0 | 0        | 0        | 0.177258 | 0.00023  | 0        | 0.002235 | 0 | 0        |
| 0 | 0        | 0        | 0.695486 | 0.006082 | 0        | 0.004208 | 0 | 0.00069  |
| 0 | 0        | 0        | 0.003912 | 0.005161 | 0        | 0.004997 | 0 | 0        |
| 0 | 0        | 0        | 0.057168 | 0.002235 | 0        | 0.002926 | 0 | 0.00069  |
| 0 | 0        | 0        | 0.002203 | 0        | 0        | 3.29E-05 | 0 | 0        |
| 0 | 0        | 0        | 0.011407 | 0        | 0        | 0.000493 | 0 | 0        |
| 0 | 0        | 0        | 0.001907 | 0        | 0        | 0.000164 | 0 | 0        |
| 0 | 0        | 0        | 0.00618  | 0.000131 | 0        | 6.57E-05 | 0 | 3.29E-05 |
| 0 | 0        | 0        | 0.030343 | 0        | 0        | 0        | 0 | 0        |
| 0 | 0        | 0        | 0.024689 | 0        | 0        | 3.29E-05 | 0 | 3.29E-05 |
| 0 | 0        | 0        | 0.031263 | 0        | 0        | 0        | 0 | 0        |
| 0 | 0        | 0        | 0.007693 | 0        | 0        | 9.86E-05 | 0 | 0        |
| 0 | 0        | 0        | 0.008021 | 0.000131 | 0        | 0.000263 | 0 | 0        |
| 0 | 0        | 0        | 0.062987 | 9.86E-05 | 0        | 0.000197 | 0 | 6.57E-05 |
| 0 | 0        | 0        | 0.074296 | 0.00046  | 0        | 0.000427 | 0 | 9.86E-05 |
| 0 | 0        | 0.001019 | 0.031625 | 9.86E-05 | 0        | 0.000625 | 0 | 0.000164 |
| 0 | 0.000197 | 0        | 0.18518  | 0.000822 | 0        | 0.000493 | 0 | 0.000131 |
| 0 | 9.86E-05 | 0        | 0.116539 | 0.000822 | 0        | 0.000723 | 0 | 0.000164 |
| 0 | 0        | 0        | 0.164502 | 0.002038 | 0        | 0.003813 | 0 | 0.000822 |
| 0 | 6.57E-05 | 0        | 0.291791 | 9.86E-05 | 0        | 0.000526 | 0 | 0        |
| 0 | 6.57E-05 | 0        | 0.135935 | 0.001742 | 0        | 0.001874 | 0 | 0        |
| 0 | 6.57E-05 | 0        | 0.21549  | 0.001118 | 0        | 0.00194  | 0 | 0.000263 |
| 0 | 0        | 0        | 0.516519 | 3.29E-05 | 0        | 0        | 0 | 0        |
| 0 | 0        | 0        | 0.055294 | 0.002893 | 3.29E-05 | 0.002794 | 0 | 0.000427 |
| 0 | 0        | 0.00046  | 0.137513 | 0.001085 | 0        | 0.003846 | 0 | 0        |
| 0 | 0        | 0        | 0.10832  | 0.00457  | 0        | 0.003945 | 0 | 0.000263 |
| 0 | 3.29E-05 | 0        | 0.09734  | 0.000131 | 0        | 0.001578 | 0 | 0.000197 |
| 0 | 0        | 0        | 0.023111 | 0.000756 | 0        | 0.00069  | 0 | 9.86E-05 |
| 0 | 0        | 0        | 0.134521 | 0        | 0        | 0.000197 | 0 | 0        |
| 0 | 0        | 0        | 0.129557 | 0        | 0        | 0.001315 | 0 | 0        |
| 0 | 0        | 0        | 0.011802 | 0.000263 | 0        | 0.000394 | 0 | 6.57E-05 |
| 0 | 0        | 0        | 0.053552 | 0        | 0        | 0.000197 | 0 | 0        |
| 0 | 0        | 0        | 0.010783 | 0.000131 | 0        | 0.000822 | 0 | 0        |
| 0 | 0        | 0        | 0.12032  | 0.000131 | 0        | 0.001282 | 0 | 0.000263 |
| 0 | 0        | 0        | 0.464052 | 6.57E-05 | 0        | 0.000493 | 0 | 3.29E-05 |
| 0 | 0        | 0        | 0.063086 | 0        | 0        | 0.000657 | 0 | 0        |
| 0 | 0        | 0        | 0.323581 | 0.026003 | 0        | 0.020809 | 0 | 0.003912 |
| 0 | 0        | 0        | 0.839048 | 0.002301 | 0        | 0.004405 | 0 | 0        |
| 0 | 0        | 0        | 0.303626 | 0.000427 | 0        | 0.000394 | 0 | 3.29E-05 |
| 0 | 0        | 3.29E-05 | 0.152208 | 0.00641  | 0        | 0.034518 | 0 | 0        |
| 0 | 0        | 0        | 0.116506 | 0.001118 | 0        | 0.001151 | 0 | 0.00023  |
| 0 | 0        | 0        | 0.221112 | 0.002137 | 0        | 0.003123 | 0 | 0.001019 |
| 0 | 0        | 0        | 0.279135 | 0.024458 | 0        | 0.016601 | 0 | 0.005621 |
| 0 | 0        | 0        | 0.019264 | 0.015319 | 0        | 0.012032 | 0 | 0.004668 |
| 0 | 0        | 0.000427 | 0.089418 | 0.000953 | 0        | 0.005457 | 0 | 0        |
| 0 | 0        | 0        | 0.109175 | 0.00595  | 0        | 0.110392 | 0 | 0.002827 |

|   |          |          |          |          |   |          |         |          |
|---|----------|----------|----------|----------|---|----------|---------|----------|
| 0 | 0        | 0        | 0.062329 | 0.000296 | 0 | 0.000822 | 0       | 0        |
| 0 | 0        | 0        | 0.142378 | 0.000657 | 0 | 0.000888 | 0       | 0        |
| 0 | 0        | 0        | 0.005589 | 0.00069  | 0 | 0.001118 | 0       | 9.86E-05 |
| 0 | 3.29E-05 | 0        | 0.309313 | 0.000953 | 0 | 0.000888 | 0       | 0        |
| 0 | 0        | 0        | 0.06085  | 0.000197 | 0 | 0.003715 | 0       | 0        |
| 0 | 0        | 0        | 0.030803 | 0        | 0 | 0.000953 | 0       | 0        |
| 0 | 0        | 0        | 0.064203 | 0.001381 | 0 | 0.000789 | 0       | 0.000197 |
| 0 | 0        | 0        | 0.032052 | 0.000263 | 0 | 0.000131 | 0       | 0        |
| 0 | 0        | 0        | 0.111509 | 0.000296 | 0 | 0.000131 | 0       | 3.29E-05 |
| 0 | 0        | 0        | 0.03054  | 0.000164 | 0 | 6.57E-05 | 0       | 0        |
| 0 | 0        | 0        | 0.043394 | 3.29E-05 | 0 | 0.000362 | 0       | 0        |
| 0 | 0        | 0        | 0.115125 | 6.57E-05 | 0 | 0        | 0       | 0        |
| 0 | 0        | 0        | 0.105789 | 6.57E-05 | 0 | 0.00092  | 0       | 0        |
| 0 | 0        | 0        | 0.078175 | 0.003255 | 0 | 0.004405 | 0       | 0.000164 |
| 0 | 6.57E-05 | 0        | 0.140537 | 0.000559 | 0 | 0.000756 | 0       | 3.29E-05 |
| 0 | 0        | 0        | 0.027516 | 0.003024 | 0 | 0.002433 | 0       | 0.000197 |
| 0 | 0        | 0.002466 | 0.153095 | 0.00023  | 0 | 0.000625 | 0       | 0        |
| 0 | 0        | 0        | 0.077254 | 3.29E-05 | 0 | 0.00194  | 0       | 0        |
| 0 | 0        | 0        | 0.064861 | 0        | 0 | 0.00069  | 0       | 0        |
| 0 | 0        | 0        | 0.066537 | 0        | 0 | 0.000263 | 0       | 0        |
| 0 | 0        | 0        | 0.059995 | 0.001183 | 0 | 0.000888 | 0       | 0        |
| 0 | 0        | 0        | 0.113416 | 0.00092  | 0 | 0.003057 | 0       | 0.000427 |
| 0 | 0        | 0        | 0.02676  | 0.00046  | 0 | 0.000986 | 0       | 9.86E-05 |
| 0 | 0        | 0        | 0.176699 | 0.000131 | 0 | 0.00023  | 0       | 0        |
| 0 | 3.29E-05 | 0        | 0.097012 | 0.001545 | 0 | 0.002104 | 0       | 0.000263 |
| 0 | 0        | 0        | 0.062231 | 0.001545 | 0 | 0.002696 | 0       | 0        |
| 0 | 0        | 3.29E-05 | 0.182813 | 0        | 0 | 3.29E-05 | 0       | 0        |
| 0 | 0        | 0        | 0.033499 | 0.00023  | 0 | 0.00069  | 0       | 0        |
| 0 | 0        | 0        | 0.021533 | 0.000394 | 0 | 0.000986 | 0       | 0.000197 |
| 0 | 0        | 0        | 0.048194 | 0.007988 | 0 | 0.012361 | 0       | 0.000756 |
| 0 | 3.29E-05 | 0        | 0.054308 | 0.000164 | 0 | 0.003189 | 0       | 3.29E-05 |
| 0 | 6.57E-05 | 0        | 0.055262 | 3.29E-05 | 0 | 0.00023  | 0       | 0        |
| 0 | 0        | 0        | 0.053059 | 3.29E-05 | 0 | 0.000164 | 0       | 9.86E-05 |
| 0 | 0        | 0        | 0.335744 | 0.002334 | 0 | 0.001677 | 0.00023 | 9.86E-05 |
| 0 | 0        | 3.29E-05 | 0.081265 | 0.000723 | 0 | 0.001216 | 0       | 0        |
| 0 | 0        | 0        | 0.05605  | 0.001019 | 0 | 0.000625 | 0       | 0        |
| 0 | 0        | 0        | 0.044183 | 0.003189 | 0 | 0.123903 | 0       | 0.00069  |
| 0 | 0        | 0.000296 | 0.010914 | 0.00092  | 0 | 0.000394 | 0       | 9.86E-05 |
| 0 | 0        | 0        | 0.013413 | 0.000592 | 0 | 0.000559 | 0       | 6.57E-05 |
| 0 | 0        | 0        | 0.050758 | 0.012525 | 0 | 0.006838 | 0       | 0.001545 |
| 0 | 0        | 0        | 0.089747 | 0.000329 | 0 | 0.001414 | 0       | 0.000427 |
| 0 | 0        | 0        | 0.005983 | 0        | 0 | 0        | 0       | 0        |
| 0 | 0        | 0        | 0.003485 | 3.29E-05 | 0 | 0.000131 | 0       | 0        |
| 0 | 0        | 0        | 0.013709 | 0.000362 | 0 | 0.00023  | 0       | 0        |
| 0 | 0        | 0        | 0.003518 | 0.000362 | 0 | 0.000263 | 0       | 0        |
| 0 | 0        | 9.86E-05 | 0.038759 | 0.002893 | 0 | 0.002268 | 0       | 0.000263 |
| 0 | 0        | 0        | 0.045169 | 3.29E-05 | 0 | 0.000164 | 0       | 0        |

|          |          |          |          |          |   |          |   |          |
|----------|----------|----------|----------|----------|---|----------|---|----------|
| 0        | 0        | 0        | 0.077156 | 0        | 0 | 0        | 0 |          |
| 0        | 0        | 0        | 0.034386 | 0.000625 | 0 | 0.001118 | 0 | 0.000296 |
| 0        | 0        | 0        | 0.038989 | 0.001019 | 0 | 0.001479 | 0 | 0.000592 |
| 0        | 0        | 0        | 0.001315 | 0.000362 | 0 | 0.000888 | 0 | 0        |
| 0        | 0        | 0        | 0.033104 | 0.000953 | 0 | 0.001578 | 0 | 9.86E-05 |
| 0        | 9.86E-05 | 0        | 0.090371 | 0        | 0 | 0        | 0 | 0        |
| 0        | 6.57E-05 | 0        | 0.104211 | 0.003715 | 0 | 0.004734 | 0 | 0.001019 |
| 0        | 3.29E-05 | 0        | 0.153917 | 0.029127 | 0 | 0.025346 | 0 | 0.004964 |
| 0        | 0        | 0        | 0.169171 | 0.001315 | 0 | 0.001512 | 0 | 3.29E-05 |
| 0        | 0        | 0        | 0.170781 | 6.57E-05 | 0 | 0.001611 | 0 | 0.000493 |
| 0        | 3.29E-05 | 0        | 0.390447 | 0        | 0 | 0.000329 | 0 | 6.57E-05 |
| 0        | 0        | 0        | 0.296262 | 0.000329 | 0 | 0.000362 | 0 | 0.000263 |
| 3.29E-05 | 0        | 0        | 0.374832 | 0.007594 | 0 | 0.009172 | 0 | 0.00309  |
| 0        | 0        | 0        | 0.279891 | 0.000362 | 0 | 0.026135 | 0 | 0        |
| 0        | 0        | 9.86E-05 | 0.13199  | 0.000526 | 0 | 0.002203 | 0 | 0        |
| 0        | 0        | 0        | 0.331306 | 0.001545 | 0 | 0.003419 | 0 | 0.000427 |
| 0        | 0        | 0.000296 | 0.38831  | 0.004241 | 0 | 0.003419 | 0 | 0.000164 |
| 0        | 0        | 0.001348 | 0.350044 | 0.005753 | 0 | 0.003386 | 0 | 0.000953 |
| 0        | 0        | 3.29E-05 | 0.523258 | 0.001479 | 0 | 0.001183 | 0 | 0.00023  |
| 0        | 0        | 0        | 0.921759 | 0        | 0 | 0.000329 | 0 | 0        |
| 0        | 0        | 0        | 0.441073 | 0.000888 | 0 | 0.001315 | 0 | 0        |
| 0        | 0        | 0        | 0.921595 | 3.29E-05 | 0 | 0.00046  | 0 | 0        |
| 0        | 0        | 0        | 0.639929 | 0.000855 | 0 | 0.001709 | 0 | 0.000131 |
| 0        | 0        | 0        | 0.736908 | 0.000657 | 0 | 0.002005 | 0 | 0        |
| 0        | 3.29E-05 | 0        | 0.046648 | 0.000131 | 0 | 0.000559 | 0 | 3.29E-05 |
| 0        | 0        | 0        | 0.05822  | 0.000493 | 0 | 0.000855 | 0 | 0        |
| 0        | 3.29E-05 | 0        | 0.244124 | 6.57E-05 | 0 | 6.57E-05 | 0 | 0        |
| 0        | 0        | 0        | 0.065485 | 0.002498 | 0 | 0.003156 | 0 | 0.001249 |
| 0        | 0        | 0        | 0.139617 | 0.003813 | 0 | 0.003419 | 0 | 0        |
| 0        | 0.000131 | 0        | 0.118873 | 0.000427 | 0 | 0.001874 | 0 | 3.29E-05 |
| 0        | 0        | 0        | 0.167395 | 0.004635 | 0 | 0.003846 | 0 | 0.000559 |
| 0        | 0        | 0        | 0.057727 | 0        | 0 | 0.001348 | 0 | 0        |
| 0        | 0        | 0        | 0.03386  | 0.001578 | 0 | 0.001249 | 0 | 9.86E-05 |
| 0        | 0        | 0        | 0.119596 | 0        | 0 | 0.00572  | 0 | 0        |
| 0        | 0.000131 | 0        | 0.272724 | 0.000822 | 0 | 0.00046  | 0 | 6.57E-05 |
| 0        | 0        | 0        | 0.035307 | 0.001052 | 0 | 0.000394 | 0 | 3.29E-05 |
| 0        | 0        | 0.001446 | 0.026595 | 6.57E-05 | 0 | 0.000197 | 0 | 0        |
| 0        | 0        | 0        | 0.172721 | 0.001052 | 0 | 0.001545 | 0 | 0        |
| 0        | 0        | 0        | 0.085835 | 0.004142 | 0 | 0.003781 | 0 | 0        |
| 0        | 0        | 0        | 0.123245 | 0.002005 | 0 | 0.002334 | 0 | 0.000197 |
| 0        | 0        | 0        | 0.0668   | 3.29E-05 | 0 | 0.000296 | 0 | 0        |
| 0        | 0        | 9.86E-05 | 0.183372 | 0.004931 | 0 | 0.00309  | 0 | 0.000427 |
| 0        | 0.000164 | 0.003485 | 0.154377 | 0.000526 | 0 | 0.001874 | 0 | 0        |
| 0        | 0        | 0        | 0.083435 | 0.00023  | 0 | 0.001315 | 0 | 0        |
| 0        | 6.57E-05 | 0.000625 | 0.095697 | 0.001907 | 0 | 0.001808 | 0 | 0.000131 |
| 0        | 0        | 0.005063 | 0.071173 | 0.00023  | 0 | 0.005819 | 0 | 0        |
| 0        | 0        | 0        | 0.079424 | 9.86E-05 | 0 | 0.000296 | 0 | 6.57E-05 |

|   |          |          |          |          |   |          |   |          |
|---|----------|----------|----------|----------|---|----------|---|----------|
| 0 | 0        | 0.000197 | 0.041191 | 9.86E-05 | 0 | 0.000164 | 0 | 0        |
| 0 | 6.57E-05 | 3.29E-05 | 0.099247 | 0.00526  | 0 | 0.002992 | 0 | 0.000657 |
| 0 | 0        | 0.002794 | 0.164207 | 0.00023  | 0 | 0.000822 | 0 | 0        |
| 0 | 9.86E-05 | 0        | 0.153621 | 0.000263 | 0 | 0.00092  | 0 | 6.57E-05 |
| 0 | 6.57E-05 | 0        | 0.284559 | 0.007397 | 0 | 0.00572  | 0 | 0.000296 |
| 0 | 9.86E-05 | 0        | 0.083599 | 0.007693 | 0 | 0.006016 | 0 | 0.000625 |
| 0 | 0        | 0.001118 | 0.083172 | 0.000526 | 0 | 0.001282 | 0 | 0        |
| 0 | 0        | 0        | 0.056708 | 0        | 0 | 0        | 0 | 0        |
| 0 | 0        | 0        | 0.068313 | 3.29E-05 | 0 | 0.000131 | 0 | 0        |
| 0 | 0        | 0        | 0.076301 | 0        | 0 | 0.000329 | 0 | 0        |
| 0 | 3.29E-05 | 0        | 0.169795 | 0.000197 | 0 | 0.001282 | 0 | 0.000197 |
| 0 | 0        | 0        | 0.089977 | 0.00023  | 0 | 0.000427 | 0 | 0        |
| 0 | 0        | 0        | 0.071238 | 3.29E-05 | 0 | 0        | 0 | 0        |
| 0 | 0        | 9.86E-05 | 0.013873 | 0.001578 | 0 | 0.002235 | 0 | 0.000296 |
| 0 | 0        | 0        | 0.012065 | 0.000427 | 0 | 0.000953 | 0 | 3.29E-05 |
| 0 | 0        | 0        | 0.015747 | 0        | 0 | 0.00023  | 0 | 0        |
| 0 | 0        | 0        | 0.002137 | 6.57E-05 | 0 | 0.000197 | 0 | 0        |
| 0 | 0        | 0        | 0.066274 | 0        | 0 | 0.000164 | 0 | 0        |
| 0 | 0        | 0        | 0.047372 | 0        | 0 | 0.000394 | 0 | 0        |
| 0 | 0        | 0        | 0.036753 | 3.29E-05 | 0 | 0.000625 | 0 | 6.57E-05 |
| 0 | 0        | 0        | 0.031461 | 0        | 0 | 0.000263 | 0 | 0        |
| 0 | 0        | 0        | 0.039581 | 3.29E-05 | 0 | 0.000394 | 0 | 0        |
| 0 | 0        | 0        | 0.040172 | 6.57E-05 | 0 | 0.000394 | 0 | 0        |
| 0 | 0        | 0        | 0.019757 | 3.29E-05 | 0 | 0.000329 | 0 | 0        |
| 0 | 0        | 0        | 0.042572 | 3.29E-05 | 0 | 0.000164 | 0 | 0        |
| 0 | 0        | 3.29E-05 | 0.06348  | 0.001578 | 0 | 0.001183 | 0 | 0        |
| 0 | 0        | 0        | 0.155133 | 0.001348 | 0 | 0.001479 | 0 | 6.57E-05 |
| 0 | 0        | 0        | 0.001249 | 0.001216 | 0 | 0.000657 | 0 | 0.000263 |
| 0 | 0        | 0        | 0.014563 | 0.000164 | 0 | 0.000164 | 0 | 3.29E-05 |
| 0 | 0        | 6.57E-05 | 0.021631 | 0        | 0 | 3.29E-05 | 0 | 0        |
| 0 | 0        | 0        | 0.004076 | 0.002005 | 0 | 0.001414 | 0 | 0.000493 |
| 0 | 0        | 0        | 0.002696 | 0.000197 | 0 | 0.000394 | 0 | 9.86E-05 |
| 0 | 0        | 0        | 0.033006 | 0.001052 | 0 | 0.000855 | 0 | 0.00023  |
| 0 | 0        | 9.86E-05 | 0.167625 | 0.004471 | 0 | 0.003222 | 0 | 0.001085 |
| 0 | 0        | 0        | 0.000657 | 0.000263 | 0 | 0.00023  | 0 | 6.57E-05 |
| 0 | 0.000197 | 0        | 0.370328 | 0.002203 | 0 | 0.002433 | 0 | 0.000592 |
| 0 | 0        | 0        | 0.506756 | 9.86E-05 | 0 | 0.001644 | 0 | 0        |
| 0 | 0        | 0        | 0.158191 | 3.29E-05 | 0 | 0.000493 | 0 | 3.29E-05 |
| 0 | 0.000197 | 0        | 0.400473 | 0.001742 | 0 | 0.0024   | 0 | 0.000394 |
| 0 | 0.000197 | 0        | 0.198593 | 0.002926 | 0 | 0.002137 | 0 | 0.000427 |
| 0 | 0        | 0        | 0.122719 | 0.000756 | 0 | 0.000526 | 0 | 3.29E-05 |
| 0 | 0        | 0        | 0.142181 | 6.57E-05 | 0 | 3.29E-05 | 0 | 0        |
| 0 | 0        | 0        | 0.094415 | 0        | 0 | 0.001282 | 0 | 0        |
| 0 | 0        | 0        | 0.082153 | 0.000296 | 0 | 0.00217  | 0 | 0        |
| 0 | 0        | 0        | 0.060752 | 0.00069  | 0 | 0.002663 | 0 | 6.57E-05 |
| 0 | 0        | 0        | 0.011999 | 0.000329 | 0 | 0.000526 | 0 | 3.29E-05 |
| 0 | 0        | 0        | 0.049377 | 9.86E-05 | 0 | 0.000164 | 0 | 0        |

|   |          |          |          |          |   |          |   |          |
|---|----------|----------|----------|----------|---|----------|---|----------|
| 0 | 0        | 0.000592 | 0.17614  | 0.000592 | 0 | 0.001348 | 0 | 3.29E-05 |
| 0 | 3.29E-05 | 0        | 0.09139  | 0.00023  | 0 | 0.001019 | 0 | 0        |
| 0 | 0        | 0        | 0.139715 | 6.57E-05 | 0 | 0.000888 | 0 | 9.86E-05 |
| 0 | 0        | 0        | 0.16539  | 0.001644 | 0 | 0.001907 | 0 | 0.000296 |
| 0 | 0        | 0        | 0.105099 | 6.57E-05 | 0 | 0.000394 | 0 | 0        |
| 0 | 0        | 0        | 0.445643 | 0.000131 | 0 | 0.001183 | 0 | 0        |
| 0 | 0        | 0        | 0.058187 | 0.001216 | 0 | 0.001216 | 0 | 0.000296 |
| 0 | 0        | 0        | 0.090371 | 0.000197 | 0 | 0.000427 | 0 | 0        |
| 0 | 0        | 0        | 0.028436 | 0.001216 | 0 | 0.004898 | 0 | 0        |
| 0 | 0        | 0        | 0.23653  | 0.000394 | 0 | 0.001183 | 0 | 0        |
| 0 | 0        | 0        | 0.491732 | 0.000329 | 0 | 0.000329 | 0 | 0        |
| 0 | 0.000329 | 3.29E-05 | 0.245998 | 0        | 0 | 0        | 0 | 0        |
| 0 | 0        | 3.29E-05 | 0.008745 | 0.003846 | 0 | 0.003715 | 0 | 0.000164 |
| 0 | 0        | 0        | 0.025412 | 0.005819 | 0 | 0.00618  | 0 | 0.001742 |
| 0 | 0        | 0        | 0.088333 | 0        | 0 | 9.86E-05 | 0 | 0        |
| 0 | 0        | 0        | 0.045005 | 9.86E-05 | 0 | 0.000296 | 0 | 3.29E-05 |
| 0 | 0        | 0        | 0.00904  | 6.57E-05 | 0 | 0.000427 | 0 | 9.86E-05 |
| 0 | 0        | 0        | 0.038726 | 0.001052 | 0 | 0.000723 | 0 | 9.86E-05 |
| 0 | 0        | 0        | 0.037345 | 0        | 0 | 0.00069  | 0 | 0        |
| 0 | 0        | 0        | 0.042934 | 0.000164 | 0 | 0.000592 | 0 | 3.29E-05 |
| 0 | 0        | 0        | 0.076104 | 3.29E-05 | 0 | 0.001907 | 0 | 0        |
| 0 | 0        | 0        | 0.099214 | 0.000953 | 0 | 0.001545 | 0 | 0.000296 |
| 0 | 0        | 0        | 0.032973 | 0.000197 | 0 | 0.000756 | 0 | 9.86E-05 |



| k_Bacteri |
|-----------|-----------|-----------|-----------|-----------|-----------|-----------|-----------|-----------|
| 0         | 0         | 0         | 0         | 0         | 0.000625  | 0         | 0         | 0         |
| 6.57E-05  | 0         | 0         | 3.29E-05  | 0         | 0.000592  | 0         | 0         | 0         |
| 0         | 0         | 0         | 0         | 0         | 0.000164  | 0         | 0         | 0         |
| 0.000131  | 0         | 0         | 0         | 0         | 3.29E-05  | 0         | 0         | 0         |
| 0         | 0         | 0         | 0         | 0         | 6.57E-05  | 0         | 0         | 0         |
| 0         | 0         | 0         | 0         | 0         | 0         | 0         | 0         | 0         |
| 0.001216  | 0         | 0         | 0         | 0         | 0.001118  | 0         | 0         | 0         |
| 9.86E-05  | 0         | 0         | 0         | 0         | 0.000197  | 0         | 0         | 0         |
| 0         | 0         | 0         | 0.002893  | 0         | 0.002531  | 0         | 0         | 0         |
| 9.86E-05  | 0         | 0         | 0         | 0         | 0         | 0         | 0         | 0         |
| 9.86E-05  | 0         | 0         | 0         | 0         | 0.000263  | 0         | 0         | 0         |
| 0         | 0         | 0         | 0         | 3.29E-05  | 0.000394  | 0         | 0         | 0         |
| 0         | 0         | 0         | 0         | 0         | 0.020152  | 0         | 0         | 0         |
| 0         | 0         | 0         | 0.000131  | 0.000362  | 0.002104  | 0         | 0         | 0         |
| 0         | 0         | 0         | 0         | 0.000756  | 0.001282  | 0         | 0         | 0         |
| 0         | 0         | 0         | 0.00046   | 0         | 0.000263  | 0         | 0         | 0         |
| 0.002827  | 0         | 0         | 0.008777  | 0         | 0.005589  | 0         | 0         | 0         |
| 0         | 0         | 0         | 0         | 0         | 0.000164  | 0         | 0         | 0         |
| 0         | 0         | 0         | 0         | 0         | 6.57E-05  | 0         | 0         | 0         |
| 0.000131  | 0         | 0         | 0.000362  | 0         | 0.000263  | 0         | 0         | 0         |
| 0         | 0         | 0         | 0         | 0         | 0.004635  | 0         | 0         | 0         |
| 0         | 0         | 0         | 0         | 0         | 9.86E-05  | 0         | 0         | 0         |
| 0         | 0         | 0         | 6.57E-05  | 0         | 0.00069   | 0         | 9.86E-05  | 0         |
| 0         | 0         | 0         | 0         | 0         | 0         | 0         | 0         | 0         |
| 0         | 0         | 0         | 0         | 0         | 0         | 0         | 0         | 0         |
| 0         | 0         | 0         | 0         | 0         | 0         | 0         | 0         | 0         |
| 9.86E-05  | 0         | 0         | 0         | 0         | 3.29E-05  | 0         | 0         | 0         |
| 0         | 0         | 0         | 0         | 0         | 0.001183  | 0         | 0         | 0         |
| 0         | 0         | 0         | 0.000131  | 0         | 0.001709  | 0         | 0         | 0         |
| 0         | 0         | 0         | 0         | 0         | 0.00069   | 0         | 0         | 0         |
| 0         | 0         | 0         | 0         | 0         | 0.00092   | 0         | 0         | 0         |
| 0         | 0         | 0         | 0         | 0         | 0.00046   | 0         | 0         | 0         |
| 0         | 0         | 0         | 0.000394  | 0         | 0.004405  | 0         | 0         | 0         |
| 0         | 0         | 0         | 0         | 0         | 0.001874  | 0         | 0         | 0         |
| 0         | 0         | 0         | 3.29E-05  | 0         | 0.000197  | 0         | 0         | 0         |
| 0         | 0         | 0         | 0         | 0         | 0.001282  | 0         | 0         | 0         |
| 0.00023   | 0         | 0         | 0         | 0         | 0.001742  | 0         | 0         | 0         |
| 0         | 0         | 0         | 0.000164  | 0         | 0.001183  | 0         | 0         | 0         |
| 0         | 0         | 0         | 0         | 0         | 0.000263  | 0         | 0         | 0         |
| 0         | 0         | 0         | 0         | 3.29E-05  | 0.000723  | 0         | 0         | 0         |
| 0         | 0         | 0         | 3.29E-05  | 0         | 0.001775  | 0         | 0         | 9.86E-05  |
| 0.000394  | 0         | 0         | 0         | 0         | 0.000427  | 0         | 0         | 0         |
| 3.29E-05  | 0         | 0         | 0         | 0         | 0.00194   | 0         | 0         | 0         |
| 0         | 0         | 0         | 6.57E-05  | 0         | 0         | 0         | 0         | 0         |

|          |          |   |          |   |          |          |   |   |
|----------|----------|---|----------|---|----------|----------|---|---|
| 0        | 0        | 0 | 0        | 0 | 0.001052 | 0        | 0 | 0 |
| 0        | 0        | 0 | 0        | 0 | 0.000822 | 0        | 0 | 0 |
| 0        | 0        | 0 | 0        | 0 | 0.00023  | 0        | 0 | 0 |
| 0        | 0        | 0 | 9.86E-05 | 0 | 0.001414 | 0        | 0 | 0 |
| 0        | 0        | 0 | 0        | 0 | 0.000789 | 0        | 0 | 0 |
| 0        | 0        | 0 | 0        | 0 | 0        | 0        | 0 | 0 |
| 0        | 0        | 0 | 0        | 0 | 0.000263 | 0        | 0 | 0 |
| 0        | 0        | 0 | 0        | 0 | 0.000164 | 0        | 0 | 0 |
| 0        | 0        | 0 | 0        | 0 | 0.000427 | 0        | 0 | 0 |
| 0        | 0        | 0 | 0        | 0 | 0.000164 | 0        | 0 | 0 |
| 0        | 0        | 0 | 0        | 0 | 0.012591 | 0        | 0 | 0 |
| 0        | 0        | 0 | 0        | 0 | 0        | 0        | 0 | 0 |
| 0.000329 | 0        | 0 | 0        | 0 | 0        | 0        | 0 | 0 |
| 0        | 0        | 0 | 0        | 0 | 0.00023  | 0        | 0 | 0 |
| 0        | 0        | 0 | 0        | 0 | 0.000559 | 0        | 0 | 0 |
| 0        | 0        | 0 | 3.29E-05 | 0 | 0.002005 | 0        | 0 | 0 |
| 0        | 0        | 0 | 0        | 0 | 0.000657 | 0        | 0 | 0 |
| 0        | 0        | 0 | 0        | 0 | 0.000329 | 0        | 0 | 0 |
| 0        | 0        | 0 | 0        | 0 | 0.000953 | 0        | 0 | 0 |
| 0.000164 | 0        | 0 | 0        | 0 | 0.001414 | 0        | 0 | 0 |
| 0.000493 | 0        | 0 | 0        | 0 | 0.001644 | 0        | 0 | 0 |
| 0        | 0        | 0 | 3.29E-05 | 0 | 0        | 0        | 0 | 0 |
| 0        | 0        | 0 | 0        | 0 | 3.29E-05 | 0        | 0 | 0 |
| 0        | 0        | 0 | 0        | 0 | 0        | 0        | 0 | 0 |
| 0        | 0        | 0 | 0        | 0 | 0.000789 | 9.86E-05 | 0 | 0 |
| 0        | 0        | 0 | 0        | 0 | 6.57E-05 | 0        | 0 | 0 |
| 0.000427 | 0        | 0 | 0.006345 | 0 | 0.007791 | 0.00046  | 0 | 0 |
| 9.86E-05 | 0        | 0 | 0.001512 | 0 | 0.0024   | 0.000164 | 0 | 0 |
| 3.29E-05 | 0        | 0 | 0        | 0 | 0.00069  | 0        | 0 | 0 |
| 0        | 0        | 0 | 0        | 0 | 0        | 0        | 0 | 0 |
| 9.86E-05 | 0        | 0 | 0        | 0 | 0.001578 | 0        | 0 | 0 |
| 0        | 0        | 0 | 0.000131 | 0 | 0.000855 | 0        | 0 | 0 |
| 0        | 0        | 0 | 0        | 0 | 0.001414 | 0        | 0 | 0 |
| 0        | 0        | 0 | 0        | 0 | 0.001874 | 0        | 0 | 0 |
| 0        | 0        | 0 | 0        | 0 | 0.001052 | 0        | 0 | 0 |
| 0        | 0        | 0 | 0        | 0 | 3.29E-05 | 0        | 0 | 0 |
| 0        | 0        | 0 | 0        | 0 | 0.001479 | 0        | 0 | 0 |
| 0        | 3.29E-05 | 0 | 0.006345 | 0 | 0.033663 | 0        | 0 | 0 |
| 0        | 0        | 0 | 0        | 0 | 0.001545 | 0        | 0 | 0 |
| 9.86E-05 | 0        | 0 | 0        | 0 | 0.001512 | 0        | 0 | 0 |
| 0        | 0        | 0 | 3.29E-05 | 0 | 0.001183 | 0        | 0 | 0 |
| 0        | 0        | 0 | 0        | 0 | 0.002071 | 0        | 0 | 0 |
| 9.86E-05 | 0        | 0 | 0        | 0 | 0.00023  | 0        | 0 | 0 |
| 0        | 0.000164 | 0 | 0.000888 | 0 | 0.021302 | 0        | 0 | 0 |
| 0        | 0        | 0 | 0.006772 | 0 | 0.001841 | 0        | 0 | 0 |
| 0        | 0        | 0 | 0.000197 | 0 | 0.000822 | 0        | 0 | 0 |
| 0        | 0        | 0 | 0        | 0 | 0.001446 | 0        | 0 | 0 |

|          |          |          |          |          |          |          |   |          |
|----------|----------|----------|----------|----------|----------|----------|---|----------|
| 0        | 0        | 0        | 0        | 0        | 0.001216 | 0        | 0 | 0        |
| 0        | 0        | 0        | 0        | 0        | 0.002203 | 0        | 0 | 0.000131 |
| 0        | 0        | 0        | 0        | 0        | 0.003518 | 0        | 0 | 6.57E-05 |
| 3.29E-05 | 0        | 0        | 3.29E-05 | 0        | 0.00217  | 0        | 0 | 3.29E-05 |
| 0        | 0        | 0        | 3.29E-05 | 0        | 0.001052 | 0        | 0 | 3.29E-05 |
| 0        | 0        | 0        | 0        | 0        | 0.000427 | 0        | 0 | 0        |
| 0        | 0        | 0        | 0        | 0        | 3.29E-05 | 0        | 0 | 0        |
| 0        | 0        | 0        | 0        | 0        | 0.000164 | 0        | 0 | 0        |
| 0        | 0        | 0        | 0        | 0        | 0.001151 | 0        | 0 | 0        |
| 0        | 0        | 0        | 3.29E-05 | 0        | 9.86E-05 | 0        | 0 | 0        |
| 0        | 0        | 0        | 0        | 0        | 0.001151 | 3.29E-05 | 0 | 0        |
| 0        | 0        | 0        | 3.29E-05 | 0        | 0.000394 | 0        | 0 | 0        |
| 0        | 0        | 0        | 0.001334 | 0        | 0.008147 | 0        | 0 | 0        |
| 0        | 0        | 0        | 0.000855 | 0        | 0.001972 | 0        | 0 | 0        |
| 9.86E-05 | 0        | 0        | 0        | 0        | 0.001216 | 0        | 0 | 0        |
| 0        | 0        | 0        | 0        | 0        | 0.001348 | 0        | 0 | 0        |
| 0        | 0        | 0.000197 | 0.000986 | 0        | 0.001742 | 0        | 0 | 0        |
| 0        | 0        | 0        | 0.00023  | 0        | 0.000329 | 0        | 0 | 0        |
| 0        | 0        | 0        | 0        | 0        | 0        | 0        | 0 | 0        |
| 0        | 0        | 0        | 0        | 0        | 0.00069  | 0        | 0 | 0        |
| 0        | 0        | 0        | 0        | 6.57E-05 | 0.00046  | 0        | 0 | 0        |
| 9.86E-05 | 0        | 0        | 0        | 0        | 0.003222 | 0        | 0 | 0        |
| 0        | 0        | 0        | 0        | 0        | 0.001315 | 0        | 0 | 0        |
| 0        | 0        | 0        | 0        | 0        | 0.001545 | 0        | 0 | 0        |
| 0        | 0        | 0        | 0        | 0        | 0.001151 | 0        | 0 | 0        |
| 0        | 0        | 0        | 0        | 0        | 0.001414 | 0        | 0 | 0        |
| 0        | 0        | 0        | 0        | 0        | 0.000197 | 0        | 0 | 0        |
| 0        | 0        | 0        | 0        | 0        | 0.007693 | 0        | 0 | 0        |
| 0        | 0        | 0        | 0        | 0        | 0.00023  | 0        | 0 | 0        |
| 0        | 0        | 0        | 0        | 0        | 0.000329 | 0        | 0 | 0        |
| 0        | 0        | 0        | 0        | 0        | 6.57E-05 | 0        | 0 | 0        |
| 0        | 0        | 0        | 0        | 3.29E-05 | 0.001479 | 0        | 0 | 0        |
| 0        | 0        | 0        | 0        | 0        | 0.000427 | 0        | 0 | 0        |
| 0        | 0        | 0        | 0        | 0        | 0.00046  | 0        | 0 | 0        |
| 0        | 0        | 0        | 0        | 0        | 0.000822 | 0        | 0 | 0        |
| 0        | 0        | 0        | 0        | 0        | 0.000822 | 0        | 0 | 0        |
| 0        | 0        | 0        | 0        | 6.57E-05 | 0.000263 | 0        | 0 | 0        |
| 0        | 0        | 0        | 0        | 0        | 0.000559 | 0        | 0 | 0        |
| 9.86E-05 | 0        | 0        | 0        | 0        | 0.002696 | 0        | 0 | 0        |
| 0        | 0        | 0        | 0        | 0        | 0.003057 | 0        | 0 | 0        |
| 0        | 0        | 0        | 0        | 3.29E-05 | 0.002893 | 0        | 0 | 0        |
| 0        | 6.57E-05 | 0        | 0        | 0        | 0.005391 | 0        | 0 | 6.57E-05 |
| 0        | 0        | 0        | 0        | 0        | 0.000197 | 0        | 0 | 0        |
| 0        | 0        | 0        | 0        | 0        | 0.003123 | 0        | 0 | 0        |
| 0        | 0        | 0        | 0        | 0        | 0.0024   | 0        | 0 | 0        |
| 0        | 0        | 0        | 0        | 0        | 0.001578 | 0        | 0 | 0        |
| 0.000592 | 0        | 0        | 0.000526 | 6.57E-05 | 0.000888 | 0        | 0 | 0        |

|          |          |   |          |          |          |   |   |          |
|----------|----------|---|----------|----------|----------|---|---|----------|
| 0        | 0        | 0 | 0        | 0        | 0.001183 | 0 | 0 | 0        |
| 0        | 0        | 0 | 0        | 0        | 0.00092  | 0 | 0 | 0        |
| 0        | 0        | 0 | 0        | 0        | 0.004142 | 0 | 0 | 0        |
| 0        | 0        | 0 | 0        | 0        | 0.001019 | 0 | 0 | 0        |
| 0        | 0        | 0 | 0        | 0        | 0.000756 | 0 | 0 | 0        |
| 0        | 0        | 0 | 0        | 0        | 0.00069  | 0 | 0 | 0        |
| 0        | 0        | 0 | 0        | 0        | 3.29E-05 | 0 | 0 | 0        |
| 0        | 0        | 0 | 0        | 0        | 0.000131 | 0 | 0 | 0        |
| 0        | 0        | 0 | 0        | 0        | 0.000164 | 0 | 0 | 0        |
| 0        | 0        | 0 | 0        | 0        | 3.29E-05 | 0 | 0 | 0        |
| 0        | 0        | 0 | 0        | 0        | 0.001348 | 0 | 0 | 0        |
| 0        | 0.000131 | 0 | 0.004701 | 0        | 0.014169 | 0 | 0 | 0        |
| 0        | 0        | 0 | 0        | 0        | 0        | 0 | 0 | 0        |
| 0        | 0        | 0 | 0        | 0        | 0.001019 | 0 | 0 | 0        |
| 0        | 0        | 0 | 0.000197 | 0        | 0.001611 | 0 | 0 | 0        |
| 0        | 0        | 0 | 0        | 0        | 0        | 0 | 0 | 0        |
| 0        | 0        | 0 | 3.29E-05 | 0        | 0.001611 | 0 | 0 | 0        |
| 0        | 0        | 0 | 0        | 0        | 0        | 0 | 0 | 0        |
| 0        | 0        | 0 | 0        | 0        | 0        | 0 | 0 | 0        |
| 0.001348 | 0        | 0 | 0        | 0        | 0.001183 | 0 | 0 | 0        |
| 0        | 0        | 0 | 0.000789 | 0        | 0.002466 | 0 | 0 | 0        |
| 0.000131 | 0        | 0 | 0        | 0        | 0.000263 | 0 | 0 | 0        |
| 0        | 0        | 0 | 0        | 0        | 0.001545 | 0 | 0 | 6.57E-05 |
| 0        | 0        | 0 | 9.86E-05 | 0        | 0.001216 | 0 | 0 | 0        |
| 6.57E-05 | 0        | 0 | 3.29E-05 | 3.29E-05 | 0.000756 | 0 | 0 | 9.86E-05 |
| 0        | 3.29E-05 | 0 | 0        | 0        | 0.000953 | 0 | 0 | 0        |
| 0        | 0        | 0 | 0.000131 | 0        | 0.002203 | 0 | 0 | 0        |
| 0        | 0.000164 | 0 | 0        | 0        | 0.004997 | 0 | 0 | 0        |
| 0        | 0        | 0 | 0.001907 | 0        | 0.007331 | 0 | 0 | 0        |
| 0        | 0        | 0 | 0        | 0        | 0.00217  | 0 | 0 | 0        |
| 0        | 0        | 0 | 0        | 0        | 0.002137 | 0 | 0 | 0        |
| 3.29E-05 | 0        | 0 | 0.000822 | 0        | 0.013873 | 0 | 0 | 0        |
| 0        | 0.000131 | 0 | 0.002071 | 0        | 0.013478 | 0 | 0 | 0        |
| 0        | 0        | 0 | 0.001216 | 0        | 0.005095 | 0 | 0 | 0        |
| 0        | 0        | 0 | 0        | 0        | 0.001775 | 0 | 0 | 0        |
| 0        | 0        | 0 | 0        | 0.000197 | 0.002696 | 0 | 0 | 0        |
| 0        | 0        | 0 | 0        | 0        | 0.001907 | 0 | 0 | 0        |
| 0        | 0        | 0 | 0        | 0        | 0.004142 | 0 | 0 | 0        |
| 0        | 0        | 0 | 3.29E-05 | 0        | 0.000329 | 0 | 0 | 0        |
| 0        | 0        | 0 | 0        | 0        | 6.57E-05 | 0 | 0 | 0        |
| 0        | 0        | 0 | 0        | 0        | 6.57E-05 | 0 | 0 | 0        |
| 0        | 0        | 0 | 0        | 0        | 0.00069  | 0 | 0 | 0        |
| 0        | 0        | 0 | 0        | 0        | 0.000493 | 0 | 0 | 0        |
| 0        | 0        | 0 | 0        | 0        | 0        | 0 | 0 | 0        |
| 0        | 0        | 0 | 3.29E-05 | 0        | 0        | 0 | 0 | 0        |
| 0.000263 | 0        | 0 | 0        | 0        | 0        | 0 | 0 | 0        |
| 0        | 0        | 0 | 0        | 0        | 0.001644 | 0 | 0 | 0        |

|          |          |   |          |          |          |          |   |          |
|----------|----------|---|----------|----------|----------|----------|---|----------|
| 0        | 0        | 0 | 0        | 0        | 0.000131 | 0        | 0 | 0        |
| 0        | 0        | 0 | 0        | 0        | 0.000131 | 0        | 0 | 0        |
| 0        | 0        | 0 | 0.000526 | 0        | 0.009764 | 0        | 0 | 0        |
| 0        | 0        | 0 | 0        | 0        | 0.000131 | 0        | 0 | 0        |
| 0        | 0        | 0 | 0        | 0        | 3.29E-05 | 0        | 0 | 0        |
| 0        | 0        | 0 | 0        | 0        | 0.001216 | 0        | 0 | 0        |
| 0        | 0        | 0 | 3.29E-05 | 0        | 0.000131 | 0        | 0 | 0        |
| 9.86E-05 | 0        | 0 | 0        | 0        | 0        | 0        | 0 | 0        |
| 9.86E-05 | 0        | 0 | 0        | 0        | 0.000197 | 3.29E-05 | 0 | 0        |
| 0        | 0        | 0 | 3.29E-05 | 0        | 0.000164 | 0        | 0 | 0        |
| 0.001249 | 0        | 0 | 0        | 0        | 0.002926 | 0        | 0 | 0        |
| 0        | 0        | 0 | 3.29E-05 | 0        | 0.002038 | 0        | 0 | 0        |
| 6.57E-05 | 0        | 0 | 0        | 0        | 6.57E-05 | 0        | 0 | 0        |
| 0        | 0        | 0 | 0        | 0        | 0.001742 | 0        | 0 | 0        |
| 0        | 0        | 0 | 0        | 0.000131 | 0.001808 | 0        | 0 | 0        |
| 0        | 3.29E-05 | 0 | 0.000657 | 0        | 0.002761 | 0        | 0 | 0        |
| 0        | 0        | 0 | 0.00023  | 0        | 0.001315 | 0        | 0 | 0        |
| 0        | 0        | 0 | 0.000296 | 0        | 0.001414 | 0        | 0 | 0        |
| 0        | 0        | 0 | 0        | 0        | 9.86E-05 | 0        | 0 | 0        |
| 0.001019 | 0        | 0 | 0.001216 | 0        | 0.00194  | 0        | 0 | 0        |
| 0        | 0        | 0 | 0        | 0        | 0.001775 | 0        | 0 | 0        |
| 0        | 0        | 0 | 0        | 0        | 0.000723 | 0        | 0 | 0        |
| 0        | 0        | 0 | 0        | 0        | 3.29E-05 | 0        | 0 | 0        |
| 0        | 0        | 0 | 0        | 0        | 0        | 0        | 0 | 0        |
| 0        | 0        | 0 | 6.57E-05 | 0        | 0.002071 | 0        | 0 | 0        |
| 0        | 0        | 0 | 0.000164 | 0        | 0.00858  | 0        | 0 | 0        |
| 0        | 0        | 0 | 0        | 0.000625 | 0.004208 | 0        | 0 | 0        |
| 0        | 6.57E-05 | 0 | 0        | 0        | 0.001446 | 0        | 0 | 0        |
| 0        | 0        | 0 | 0        | 0        | 0.00046  | 0        | 0 | 0        |
| 0        | 0        | 0 | 9.86E-05 | 0        | 0.000723 | 0        | 0 | 0        |
| 0        | 0        | 0 | 0        | 0        | 0.002038 | 0        | 0 | 0        |
| 0        | 0        | 0 | 0        | 0        | 0.000131 | 0        | 0 | 0        |
| 0.000296 | 0        | 0 | 6.57E-05 | 0        | 6.57E-05 | 3.29E-05 | 0 | 0        |
| 0        | 0        | 0 | 0        | 0        | 0.000131 | 0        | 0 | 0        |
| 0        | 0        | 0 | 0        | 0        | 0.001085 | 0        | 0 | 0        |
| 0        | 0        | 0 | 0        | 0        | 0.001611 | 0        | 0 | 0        |
| 0.000559 | 0        | 0 | 0.000625 | 0        | 0.003813 | 0        | 0 | 0        |
| 0        | 0        | 0 | 0        | 0        | 0.001578 | 0        | 0 | 0        |
| 0        | 0        | 0 | 0        | 0        | 0.001282 | 0        | 0 | 0.000164 |
| 0        | 0        | 0 | 0.000131 | 0        | 0.001052 | 0        | 0 | 0        |
| 3.29E-05 | 0        | 0 | 0        | 0        | 0.000493 | 0        | 0 | 0        |
| 0        | 0        | 0 | 0        | 0        | 0.001249 | 0        | 0 | 0        |
| 0        | 0        | 0 | 0        | 0        | 0.002663 | 0        | 0 | 0        |
| 6.57E-05 | 0        | 0 | 0        | 0        | 0.002038 | 0        | 0 | 0        |
| 0        | 0        | 0 | 0        | 0        | 0.002268 | 0        | 0 | 0        |
| 0        | 0        | 0 | 0.001085 | 0        | 0.007956 | 0        | 0 | 0        |
| 0        | 0        | 0 | 0.000131 | 0.000164 | 0.005358 | 0        | 0 | 0        |

|          |          |   |          |          |          |   |          |          |
|----------|----------|---|----------|----------|----------|---|----------|----------|
| 0        | 0        | 0 | 0        | 0        | 0.002466 | 0 | 0        | 0        |
| 0        | 0        | 0 | 0        | 0        | 0.000263 | 0 | 0        | 0        |
| 0        | 0        | 0 | 0        | 0        | 0.000986 | 0 | 0        | 0        |
| 0        | 0        | 0 | 0        | 0        | 0        | 0 | 0        | 0        |
| 0        | 0        | 0 | 0        | 0        | 0.001282 | 0 | 0        | 0        |
| 0        | 6.57E-05 | 0 | 0.00023  | 0        | 0.002071 | 0 | 0        | 0        |
| 0        | 0        | 0 | 0        | 0        | 0.001118 | 0 | 0        | 0        |
| 0        | 0        | 0 | 0        | 0        | 0.001972 | 0 | 0        | 0        |
| 0        | 0        | 0 | 0        | 0        | 0        | 0 | 0        | 0        |
| 3.29E-05 | 0        | 0 | 0        | 0        | 0.001118 | 0 | 0        | 0        |
| 0        | 0        | 0 | 0.000493 | 0        | 0.001019 | 0 | 0        | 0        |
| 0        | 0        | 0 | 0.000394 | 0        | 0.001052 | 0 | 0        | 0        |
| 0        | 0        | 0 | 0.001183 | 0        | 0.008153 | 0 | 0        | 0        |
| 0.001216 | 0        | 0 | 0        | 0        | 0.000427 | 0 | 0        | 0        |
| 0        | 0        | 0 | 0        | 0        | 0.004339 | 0 | 0        | 0        |
| 0        | 0        | 0 | 0        | 0        | 0.005917 | 0 | 0        | 0        |
| 0        | 0        | 0 | 0        | 0        | 0.001644 | 0 | 0        | 3.29E-05 |
| 0        | 0        | 0 | 0        | 0        | 0.00069  | 0 | 0        | 0        |
| 0        | 0        | 0 | 0        | 0        | 0.001742 | 0 | 0        | 0        |
| 0        | 0        | 0 | 0        | 0        | 0.00194  | 0 | 0        | 0        |
| 0        | 0        | 0 | 0        | 0        | 0.001414 | 0 | 0        | 0        |
| 0        | 0        | 0 | 0        | 0        | 0.000986 | 0 | 0        | 0        |
| 0        | 0        | 0 | 0        | 0        | 0.000789 | 0 | 0        | 0        |
| 0        | 0        | 0 | 0.000427 | 0        | 0.000164 | 0 | 0        | 0        |
| 0        | 0        | 0 | 0        | 0        | 3.29E-05 | 0 | 0        | 0        |
| 0        | 0        | 0 | 6.57E-05 | 0        | 0.000592 | 0 | 0        | 0        |
| 0        | 0        | 0 | 0        | 0        | 9.86E-05 | 0 | 0        | 0        |
| 0        | 0        | 0 | 0        | 0        | 0.000131 | 0 | 0        | 0        |
| 0        | 0        | 0 | 0        | 0        | 0.000822 | 0 | 3.29E-05 | 0        |
| 0        | 0        | 0 | 0        | 0        | 3.29E-05 | 0 | 0        | 0        |
| 0        | 0        | 0 | 0        | 0        | 0.000131 | 0 | 0        | 0        |
| 0        | 0        | 0 | 0        | 0        | 0.000164 | 0 | 0        | 0        |
| 0        | 0        | 0 | 6.57E-05 | 0        | 0.000427 | 0 | 0        | 0        |
| 0        | 0        | 0 | 0        | 6.57E-05 | 0.000164 | 0 | 0        | 0        |
| 0        | 0        | 0 | 0        | 0        | 0.001381 | 0 | 0        | 0        |
| 0        | 0        | 0 | 0        | 0        | 0.001348 | 0 | 0        | 0        |
| 0        | 0        | 0 | 3.29E-05 | 0        | 0.003583 | 0 | 0        | 0        |
| 0        | 0        | 0 | 0        | 0        | 0.002268 | 0 | 0        | 0        |
| 0        | 0        | 0 | 0        | 0        | 0.002071 | 0 | 0        | 0        |
| 0        | 0        | 0 | 0        | 0        | 0.001118 | 0 | 0        | 0        |
| 0        | 0        | 0 | 0        | 0        | 0.001315 | 0 | 0        | 0        |
| 0        | 0        | 0 | 0        | 0        | 0.003452 | 0 | 0        | 0        |
| 0        | 0        | 0 | 0        | 0        | 0.000394 | 0 | 0        | 0        |
| 0        | 0        | 0 | 0        | 0        | 0.00046  | 0 | 0        | 0        |
| 0        | 0        | 0 | 6.57E-05 | 0        | 0.00046  | 0 | 0        | 0        |
| 0        | 0        | 0 | 0        | 0        | 0.000625 | 0 | 0        | 0        |
| 0        | 0        | 0 | 0        | 0        | 0.000131 | 0 | 0        | 0        |

|          |   |   |          |          |          |   |          |          |
|----------|---|---|----------|----------|----------|---|----------|----------|
| 0        | 0 | 0 | 3.29E-05 | 0        | 0.000986 | 0 | 0        | 0        |
| 0        | 0 | 0 | 0        | 0        | 0.000493 | 0 | 0        | 0        |
| 0        | 0 | 0 | 9.86E-05 | 0        | 0.000756 | 0 | 0        | 0        |
| 0        | 0 | 0 | 0        | 0        | 0.003616 | 0 | 0        | 0        |
| 0        | 0 | 0 | 0        | 0        | 0.001381 | 0 | 0        | 0        |
| 0        | 0 | 0 | 0.000263 | 0        | 0.000526 | 0 | 0        | 0        |
| 0        | 0 | 0 | 0        | 0.000296 | 0.00217  | 0 | 0        | 0        |
| 0        | 0 | 0 | 0        | 0.00023  | 0.001085 | 0 | 0        | 0        |
| 0        | 0 | 0 | 0        | 0        | 0.002203 | 0 | 0        | 0        |
| 0        | 0 | 0 | 0        | 3.29E-05 | 0.00069  | 0 | 0        | 0        |
| 0        | 0 | 0 | 0        | 0        | 0.000986 | 0 | 0        | 0        |
| 0        | 0 | 0 | 0        | 0.000131 | 0.00046  | 0 | 0        | 0        |
| 0        | 0 | 0 | 0        | 0.000855 | 0.000756 | 0 | 0        | 0        |
| 0        | 0 | 0 | 0        | 3.29E-05 | 0.00046  | 0 | 0        | 0        |
| 0        | 0 | 0 | 0        | 0        | 0.000559 | 0 | 0        | 0        |
| 0        | 0 | 0 | 0        | 0        | 0.001479 | 0 | 0        | 0        |
| 0        | 0 | 0 | 0.000197 | 0        | 0.001677 | 0 | 0        | 0        |
| 0        | 0 | 0 | 0        | 0        | 0.000362 | 0 | 0        | 0        |
| 6.57E-05 | 0 | 0 | 0        | 0        | 0.000789 | 0 | 0        | 0        |
| 0        | 0 | 0 | 0        | 0        | 0.000394 | 0 | 0        | 0        |
| 0        | 0 | 0 | 0        | 0        | 0.000362 | 0 | 0        | 0        |
| 0        | 0 | 0 | 0        | 0        | 0.00023  | 0 | 0        | 0        |
| 0        | 0 | 0 | 6.57E-05 | 0        | 0.002531 | 0 | 0        | 0        |
| 6.57E-05 | 0 | 0 | 0        | 0        | 0.001315 | 0 | 0        | 0        |
| 0        | 0 | 0 | 0        | 0        | 3.29E-05 | 0 | 0        | 0        |
| 0        | 0 | 0 | 0        | 0        | 3.29E-05 | 0 | 0        | 0        |
| 9.86E-05 | 0 | 0 | 0        | 0        | 0        | 0 | 0        | 0        |
| 0        | 0 | 0 | 0        | 0        | 0.000131 | 0 | 0        | 0        |
| 0        | 0 | 0 | 0        | 0        | 0.001249 | 0 | 0        | 0.000164 |
| 0        | 0 | 0 | 0        | 0        | 0.000164 | 0 | 0        | 3.29E-05 |
| 0        | 0 | 0 | 0        | 0        | 0        | 0 | 0        | 9.86E-05 |
| 0        | 0 | 0 | 0        | 0        | 0.001545 | 0 | 0        | 0        |
| 0        | 0 | 0 | 0        | 0        | 0        | 0 | 0        | 0        |
| 3.29E-05 | 0 | 0 | 0        | 0        | 0.00263  | 0 | 0        | 0        |
| 0        | 0 | 0 | 0        | 0        | 0.001578 | 0 | 0        | 0        |
| 0        | 0 | 0 | 0        | 0        | 0.000953 | 0 | 0        | 0        |
| 0        | 0 | 0 | 0        | 0        | 0.00641  | 0 | 6.57E-05 | 0        |
| 0        | 0 | 0 | 0        | 0        | 0.004964 | 0 | 0        | 0        |
| 0        | 0 | 0 | 0        | 0        | 0.001644 | 0 | 0        | 0        |
| 0        | 0 | 0 | 0        | 0        | 0.00355  | 0 | 0        | 0        |
| 0        | 0 | 0 | 0        | 0        | 0.000625 | 0 | 0        | 0        |
| 0        | 0 | 0 | 0        | 0        | 0.001479 | 0 | 0        | 0        |
| 0        | 0 | 0 | 0        | 0        | 0.004076 | 0 | 0        | 0        |
| 0.001216 | 0 | 0 | 0.001446 | 0        | 0.001742 | 0 | 0        | 0        |
| 0.000164 | 0 | 0 | 0        | 0        | 0.00309  | 0 | 0        | 0        |
| 0.00023  | 0 | 0 | 0        | 0        | 0.002071 | 0 | 0        | 0        |
| 0        | 0 | 0 | 0        | 0        | 0.001183 | 0 | 0        | 0.000394 |

|          |          |   |          |          |          |   |   |          |
|----------|----------|---|----------|----------|----------|---|---|----------|
| 0        | 0        | 0 | 0        | 3.29E-05 | 0.001282 | 0 | 0 | 0.002235 |
| 0        | 0        | 0 | 9.86E-05 | 3.29E-05 | 0.002071 | 0 | 0 | 0.000329 |
| 0.00023  | 0        | 0 | 0        | 6.57E-05 | 0.000625 | 0 | 0 | 0        |
| 0        | 0        | 0 | 0        | 0        | 0.005884 | 0 | 0 | 0        |
| 0        | 0        | 0 | 0        | 0        | 0.003846 | 0 | 0 | 0        |
| 0        | 0        | 0 | 0        | 0        | 0.002498 | 0 | 0 | 0        |
| 0        | 0        | 0 | 0        | 0        | 0.000362 | 0 | 0 | 0        |
| 0        | 0        | 0 | 0.000131 | 0        | 0.000197 | 0 | 0 | 0        |
| 0        | 0        | 0 | 0        | 0        | 0.00355  | 0 | 0 | 0        |
| 0        | 0        | 0 | 0        | 0        | 0.00092  | 0 | 0 | 0        |
| 0        | 0        | 0 | 3.29E-05 | 0        | 0.001742 | 0 | 0 | 0        |
| 0        | 0        | 0 | 0.000131 | 0        | 3.29E-05 | 0 | 0 | 0        |
| 0        | 0        | 0 | 0        | 0        | 0.000131 | 0 | 0 | 0        |
| 0        | 0        | 0 | 3.29E-05 | 0        | 0.002301 | 0 | 0 | 0        |
| 0        | 0        | 0 | 0        | 0        | 0.000362 | 0 | 0 | 0        |
| 0        | 0        | 0 | 0.000164 | 0        | 0.000296 | 0 | 0 | 3.29E-05 |
| 0        | 0        | 0 | 0        | 0        | 0.002104 | 0 | 0 | 0        |
| 0        | 0        | 0 | 6.57E-05 | 0        | 0.000164 | 0 | 0 | 0        |
| 0        | 0        | 0 | 0        | 0        | 0.000263 | 0 | 0 | 0        |
| 0.000263 | 0        | 0 | 0        | 0        | 0.00092  | 0 | 0 | 0        |
| 0        | 3.29E-05 | 0 | 0        | 0        | 0.000296 | 0 | 0 | 0        |
| 0        | 0        | 0 | 6.57E-05 | 3.29E-05 | 0.001907 | 0 | 0 | 6.57E-05 |
| 0        | 0        | 0 | 0        | 0        | 0.000789 | 0 | 0 | 0.000164 |
| 0        | 0        | 0 | 0.000493 | 0        | 0.002038 | 0 | 0 | 6.57E-05 |
| 0        | 0        | 0 | 0        | 0        | 0.000197 | 0 | 0 | 6.57E-05 |
| 0        | 0        | 0 | 0        | 3.29E-05 | 0.000197 | 0 | 0 | 0.000131 |
| 0        | 0        | 0 | 0        | 0        | 0.0024   | 0 | 0 | 0.00069  |
| 0        | 0        | 0 | 0        | 0        | 0.000164 | 0 | 0 | 0        |
| 0        | 0        | 0 | 0        | 0        | 0.00046  | 0 | 0 | 0        |
| 0        | 0        | 0 | 0        | 0        | 0.000263 | 0 | 0 | 0        |
| 3.29E-05 | 0        | 0 | 0        | 0        | 3.29E-05 | 0 | 0 | 0        |
| 0        | 0        | 0 | 0        | 0        | 0.001183 | 0 | 0 | 0        |
| 0        | 0        | 0 | 0        | 0        | 0.000888 | 0 | 0 | 0        |
| 0        | 0        | 0 | 0        | 0        | 3.29E-05 | 0 | 0 | 0        |
| 0        | 0        | 0 | 6.57E-05 | 0        | 3.29E-05 | 0 | 0 | 0        |
| 0        | 0        | 0 | 0.000526 | 0        | 0.001874 | 0 | 0 | 0        |
| 0        | 0        | 0 | 0        | 0        | 0.000855 | 0 | 0 | 0        |
| 0        | 0        | 0 | 0        | 0        | 0.00069  | 0 | 0 | 0.000559 |
| 0        | 0        | 0 | 0        | 0        | 0.000756 | 0 | 0 | 0        |
| 0        | 0        | 0 | 0        | 0        | 3.29E-05 | 0 | 0 | 0        |
| 0        | 0        | 0 | 0        | 0        | 0.000625 | 0 | 0 | 0        |
| 0        | 0        | 0 | 0        | 0        | 0.000263 | 0 | 0 | 0        |
| 0        | 0        | 0 | 0        | 0        | 0.003682 | 0 | 0 | 0        |
| 0        | 0        | 0 | 0        | 0        | 0.000296 | 0 | 0 | 0        |
| 0        | 3.29E-05 | 0 | 0        | 0        | 0.000131 | 0 | 0 | 0        |
| 0        | 0        | 0 | 0        | 0        | 0.003255 | 0 | 0 | 0        |
| 0.000164 | 0.000131 | 0 | 0.000329 | 0        | 0.008745 | 0 | 0 | 0        |



|          |          |   |          |          |          |   |   |          |
|----------|----------|---|----------|----------|----------|---|---|----------|
| 0        | 0        | 0 | 0        | 0        | 3.29E-05 | 0 | 0 | 0        |
| 0        | 0        | 0 | 0.000657 | 0        | 0.000362 | 0 | 0 | 0        |
| 0        | 6.57E-05 | 0 | 0.000263 | 0        | 0.003222 | 0 | 0 | 0        |
| 0        | 0        | 0 | 0.000197 | 0        | 0.00263  | 0 | 0 | 0        |
| 3.29E-05 | 0        | 0 | 0        | 0        | 0.001249 | 0 | 0 | 0        |
| 0        | 0        | 0 | 0        | 0        | 0        | 0 | 0 | 0        |
| 0        | 0        | 0 | 0.00023  | 0        | 9.86E-05 | 0 | 0 | 0        |
| 0        | 0        | 0 | 0        | 0        | 0.000131 | 0 | 0 | 0        |
| 0        | 0        | 0 | 0        | 0        | 0.000197 | 0 | 0 | 0        |
| 0        | 0        | 0 | 0        | 0        | 0        | 0 | 0 | 0        |
| 0        | 0        | 0 | 0        | 0        | 6.57E-05 | 0 | 0 | 0        |
| 0        | 0        | 0 | 0        | 0        | 0.000197 | 0 | 0 | 0        |
| 0        | 0        | 0 | 0        | 0        | 6.57E-05 | 0 | 0 | 0        |
| 0        | 0        | 0 | 0        | 0        | 0.000164 | 0 | 0 | 0        |
| 0        | 3.29E-05 | 0 | 0        | 0        | 0.000296 | 0 | 0 | 0        |
| 0        | 0        | 0 | 0.000131 | 0        | 0.000493 | 0 | 0 | 0        |
| 0        | 0        | 0 | 0        | 0        | 0.00069  | 0 | 0 | 0        |
| 0        | 0        | 0 | 0.000131 | 0        | 0.002564 | 0 | 0 | 0        |
| 0        | 0        | 0 | 0.000164 | 0        | 0.003156 | 0 | 0 | 0        |
| 0.000164 | 0        | 0 | 0.000263 | 0        | 0.006345 | 0 | 0 | 0        |
| 0        | 0        | 0 | 0        | 0        | 0.000493 | 0 | 0 | 0        |
| 0        | 0        | 0 | 0.000131 | 0        | 0.001512 | 0 | 0 | 0        |
| 0        | 0        | 0 | 0        | 0        | 0.001085 | 0 | 0 | 0        |
| 0        | 0        | 0 | 0        | 0        | 0.000592 | 0 | 0 | 0        |
| 0        | 0        | 0 | 0        | 0        | 0.002367 | 0 | 0 | 0        |
| 0        | 0        | 0 | 0.001348 | 0        | 0.001183 | 0 | 0 | 0        |
| 0        | 0        | 0 | 0        | 0        | 0.003419 | 0 | 0 | 0        |
| 0        | 0        | 0 | 6.57E-05 | 0        | 0.002729 | 0 | 0 | 0        |
| 0        | 0        | 0 | 6.57E-05 | 0        | 0.000789 | 0 | 0 | 0        |
| 0        | 0        | 0 | 0        | 0        | 0.001151 | 0 | 0 | 0        |
| 0        | 0        | 0 | 0        | 0        | 0.001742 | 0 | 0 | 0.000164 |
| 0        | 0        | 0 | 9.86E-05 | 0        | 0.000592 | 0 | 0 | 0        |
| 0        | 0        | 0 | 0        | 0        | 0.001216 | 0 | 0 | 6.57E-05 |
| 0        | 0        | 0 | 0        | 0        | 0.000164 | 0 | 0 | 0        |
| 0        | 0        | 0 | 0        | 0        | 0.000362 | 0 | 0 | 3.29E-05 |
| 6.57E-05 | 0        | 0 | 0        | 0        | 0.000394 | 0 | 0 | 0        |
| 0        | 0        | 0 | 0        | 0        | 0.001085 | 0 | 0 | 3.29E-05 |
| 0        | 6.57E-05 | 0 | 0.000822 | 0        | 0.016306 | 0 | 0 | 0        |
| 0.002729 | 0        | 0 | 0        | 0        | 0.002104 | 0 | 0 | 0        |
| 0.000164 | 0        | 0 | 0        | 6.57E-05 | 0.000493 | 0 | 0 | 0        |
| 0        | 0        | 0 | 0.002005 | 0        | 0.0048   | 0 | 0 | 0        |
| 0        | 0        | 0 | 0        | 0        | 0.001019 | 0 | 0 | 0        |
| 0        | 0        | 0 | 0        | 0        | 0.001381 | 0 | 0 | 0        |
| 0        | 6.57E-05 | 0 | 0.00069  | 0        | 0.017226 | 0 | 0 | 0        |
| 0        | 6.57E-05 | 0 | 3.29E-05 | 0        | 0.006246 | 0 | 0 | 0        |
| 0        | 0        | 0 | 0        | 0        | 0.001677 | 0 | 0 | 0        |
| 6.57E-05 | 0        | 0 | 0.017982 | 0        | 0.016536 | 0 | 0 | 0        |

|          |          |   |          |          |          |          |   |          |
|----------|----------|---|----------|----------|----------|----------|---|----------|
| 0        | 0        | 0 | 0        | 0        | 0.001545 | 0        | 0 | 0        |
| 0        | 0        | 0 | 0        | 0        | 0.000855 | 0        | 0 | 0        |
| 0        | 0        | 0 | 6.57E-05 | 0        | 0.000789 | 3.29E-05 | 0 | 0        |
| 6.57E-05 | 0        | 0 | 0        | 0        | 0.001052 | 0        | 0 | 0        |
| 0.000263 | 0        | 0 | 0.000296 | 0        | 0.001282 | 0        | 0 | 0        |
| 3.29E-05 | 0        | 0 | 0        | 0        | 0.001019 | 0        | 0 | 0        |
| 0        | 6.57E-05 | 0 | 6.57E-05 | 9.86E-05 | 0.000888 | 0        | 0 | 0        |
| 0        | 0        | 0 | 0        | 3.29E-05 | 0.000526 | 0        | 0 | 0        |
| 0        | 0        | 0 | 0        | 0.000164 | 0.00069  | 0        | 0 | 0        |
| 0        | 0        | 0 | 0        | 0        | 0.000986 | 0        | 0 | 0        |
| 0        | 0        | 0 | 3.29E-05 | 3.29E-05 | 0.000657 | 0        | 0 | 0        |
| 0        | 0        | 0 | 0        | 6.57E-05 | 0.001381 | 0        | 0 | 0        |
| 0        | 0        | 0 | 0        | 0        | 0.002794 | 0        | 0 | 0.001348 |
| 0        | 0        | 0 | 3.29E-05 | 0.00023  | 0.003255 | 0        | 0 | 0.001545 |
| 0        | 0        | 0 | 6.57E-05 | 0        | 0.001808 | 0        | 0 | 0.000131 |
| 0        | 0        | 0 | 0        | 0.00023  | 0.002203 | 0        | 0 | 0        |
| 0        | 0        | 0 | 0        | 0        | 0.003879 | 0        | 0 | 0        |
| 0        | 0        | 0 | 0.000362 | 0        | 0.003222 | 0.000131 | 0 | 0.000164 |
| 0        | 0        | 0 | 0        | 0        | 0.001479 | 0        | 0 | 0.000197 |
| 6.57E-05 | 0        | 0 | 0        | 3.29E-05 | 0.001381 | 0        | 0 | 0.000296 |
| 0        | 0        | 0 | 0        | 0        | 0.001578 | 0        | 0 | 0.000164 |
| 0.000131 | 0        | 0 | 0.000263 | 3.29E-05 | 0.000559 | 0        | 0 | 0        |
| 0        | 0        | 0 | 6.57E-05 | 0        | 0.001216 | 0        | 0 | 0        |
| 0        | 0        | 0 | 0        | 0        | 0.000592 | 0        | 0 | 0        |
| 0        | 0        | 0 | 0        | 0        | 0.003386 | 0        | 0 | 0        |
| 0.000329 | 0        | 0 | 0        | 0        | 0.002992 | 0        | 0 | 0.000625 |
| 0        | 0        | 0 | 0        | 0        | 0.000263 | 0        | 0 | 0.000296 |
| 0        | 0        | 0 | 0        | 0        | 0.001775 | 0        | 0 | 0        |
| 0        | 3.29E-05 | 0 | 0        | 0        | 0.001151 | 0        | 0 | 0        |
| 0        | 0        | 0 | 0.000493 | 0        | 0.007232 | 0        | 0 | 0.000164 |
| 0        | 0        | 0 | 3.29E-05 | 0.000131 | 0.00023  | 0        | 0 | 0        |
| 0        | 0        | 0 | 0        | 6.57E-05 | 0.000526 | 0        | 0 | 0        |
| 0        | 0        | 0 | 0        | 0        | 0.000592 | 0        | 0 | 0        |
| 0        | 0        | 0 | 0.000526 | 0        | 0.001381 | 0        | 0 | 0        |
| 3.29E-05 | 0        | 0 | 0        | 0        | 0.000296 | 0        | 0 | 0        |
| 0        | 0        | 0 | 0        | 0        | 0.000131 | 0        | 0 | 0        |
| 0.000559 | 0        | 0 | 0.002038 | 0        | 0.029554 | 0.000362 | 0 | 0        |
| 0        | 0        | 0 | 0        | 0        | 0.000723 | 0        | 0 | 0        |
| 0        | 0        | 0 | 0        | 0        | 0.00069  | 0        | 0 | 0        |
| 0        | 3.29E-05 | 0 | 0        | 0        | 0.006608 | 0        | 0 | 0        |
| 0        | 0        | 0 | 0.000131 | 0        | 0.001381 | 0        | 0 | 0        |
| 0        | 0        | 0 | 0        | 0        | 0        | 0        | 0 | 0        |
| 0        | 0        | 0 | 0        | 0        | 3.29E-05 | 0        | 0 | 0        |
| 0        | 0        | 0 | 3.29E-05 | 0        | 0.000263 | 0        | 0 | 0        |
| 0        | 0        | 0 | 0.000164 | 0        | 9.86E-05 | 0        | 0 | 0        |
| 0        | 3.29E-05 | 0 | 0.000263 | 0        | 0.002663 | 0        | 0 | 0        |
| 0        | 0        | 0 | 3.29E-05 | 0.000197 | 0.000164 | 0        | 0 | 0        |

|          |          |   |          |          |          |   |          |          |
|----------|----------|---|----------|----------|----------|---|----------|----------|
| 0        | 0        | 0 | 0        | 0        | 0.00217  | 0 | 0        | 0        |
| 0        | 0        | 0 | 0        | 0        | 0.001644 | 0 | 0        | 0        |
| 0        | 0        | 0 | 9.86E-05 | 0        | 0.001479 | 0 | 0        | 0        |
| 0.000131 | 0        | 0 | 0        | 0        | 0.002466 | 0 | 0        | 0        |
| 0        | 0        | 0 | 0        | 0        | 0.000986 | 0 | 0        | 0        |
| 0        | 0        | 0 | 0        | 0        | 0.006936 | 0 | 0        | 0        |
| 0        | 0        | 0 | 0        | 0        | 0.004471 | 0 | 0        | 0        |
| 0        | 0        | 0 | 0        | 0        | 0.02219  | 0 | 0        | 0        |
| 0        | 0        | 0 | 0        | 0        | 3.29E-05 | 0 | 0        | 0        |
| 0        | 0        | 0 | 0.001183 | 0        | 0.003485 | 0 | 0        | 0        |
| 0        | 0        | 0 | 0        | 0        | 3.29E-05 | 0 | 0        | 0        |
| 0        | 0        | 0 | 0        | 0        | 0.000329 | 0 | 0        | 0        |
| 0.003156 | 3.29E-05 | 0 | 0        | 0        | 0.004865 | 0 | 0        | 0        |
| 0.00217  | 0        | 0 | 0.002268 | 0        | 0.009698 | 0 | 0.000263 | 3.29E-05 |
| 0        | 0        | 0 | 0        | 0        | 6.57E-05 | 0 | 0        | 0        |
| 0        | 0        | 0 | 0.000592 | 0        | 0.003255 | 0 | 0        | 0        |
| 0        | 0        | 0 | 0.000164 | 0        | 0.003123 | 0 | 0        | 0        |
| 0        | 0        | 0 | 0.00046  | 0        | 0.002959 | 0 | 0        | 0        |
| 0        | 0        | 0 | 0        | 0        | 0.000855 | 0 | 0        | 0        |
| 0        | 0        | 0 | 0        | 0        | 0        | 0 | 0        | 0        |
| 0.001052 | 0        | 0 | 0        | 0        | 0.001611 | 0 | 0        | 0        |
| 0        | 0        | 0 | 0        | 0        | 6.57E-05 | 0 | 0        | 0        |
| 9.86E-05 | 0        | 0 | 6.57E-05 | 0        | 0.000756 | 0 | 0        | 0        |
| 0.000625 | 0        | 0 | 0        | 0        | 0.001052 | 0 | 0        | 0        |
| 0        | 0        | 0 | 6.57E-05 | 0        | 0.000888 | 0 | 0        | 0        |
| 0        | 0        | 0 | 0        | 0        | 0.000855 | 0 | 0        | 9.86E-05 |
| 0        | 0        | 0 | 0        | 0        | 0.000263 | 0 | 0        | 0        |
| 0        | 3.29E-05 | 0 | 0.000362 | 0        | 0.002663 | 0 | 0        | 0        |
| 0        | 0        | 0 | 9.86E-05 | 0        | 0.002038 | 0 | 0        | 0        |
| 0        | 0        | 0 | 3.29E-05 | 0        | 0.005063 | 0 | 0        | 0        |
| 0        | 3.29E-05 | 0 | 3.29E-05 | 0        | 0.003255 | 0 | 0        | 0        |
| 3.29E-05 | 0        | 0 | 0        | 0        | 0.001282 | 0 | 0        | 0        |
| 0        | 0        | 0 | 0.000526 | 0        | 0.000855 | 0 | 0        | 9.86E-05 |
| 0        | 0        | 0 | 0        | 0        | 0.00217  | 0 | 0        | 0        |
| 0        | 0        | 0 | 0        | 0        | 0.000822 | 0 | 0        | 0        |
| 0        | 0        | 0 | 0        | 0        | 0.000526 | 0 | 0        | 0.000197 |
| 0        | 0        | 0 | 0        | 0        | 0.000131 | 0 | 0        | 0.000296 |
| 0        | 0        | 0 | 0        | 0        | 0.00046  | 0 | 0        | 0        |
| 0        | 0        | 0 | 0        | 0        | 0.000953 | 0 | 0        | 0        |
| 0        | 0        | 0 | 9.86E-05 | 0        | 0.001446 | 0 | 0        | 0        |
| 3.29E-05 | 0        | 0 | 0        | 0        | 3.29E-05 | 0 | 0        | 0.001644 |
| 0        | 0        | 0 | 0.000164 | 0        | 0.005194 | 0 | 0        | 0.000131 |
| 0        | 0        | 0 | 0.00023  | 0        | 0.001611 | 0 | 0        | 0        |
| 0        | 0        | 0 | 0.000296 | 0        | 0.001348 | 0 | 0        | 0.000164 |
| 0        | 0        | 0 | 0        | 3.29E-05 | 0.006871 | 0 | 0        | 0        |
| 0        | 0        | 0 | 0.000164 | 0        | 0.000888 | 0 | 0        | 0        |
| 0        | 0        | 0 | 0        | 0        | 0.000263 | 0 | 0        | 0        |

|          |          |   |          |          |          |   |          |          |
|----------|----------|---|----------|----------|----------|---|----------|----------|
| 0        | 0        | 0 | 3.29E-05 | 0        | 3.29E-05 | 0 | 0        | 0        |
| 0        | 0        | 0 | 0        | 0        | 0.002794 | 0 | 0        | 0        |
| 0        | 0        | 0 | 6.57E-05 | 3.29E-05 | 0.000756 | 0 | 0        | 0        |
| 0        | 0        | 0 | 0        | 0        | 0.001348 | 0 | 3.29E-05 | 0        |
| 3.29E-05 | 0        | 0 | 0        | 0        | 0.002729 | 0 | 0        | 0        |
| 0        | 0        | 0 | 0.001183 | 0        | 0.005457 | 0 | 0        | 0        |
| 0.000362 | 0        | 0 | 0        | 9.86E-05 | 0.001644 | 0 | 0        | 0        |
| 0        | 0        | 0 | 0        | 3.29E-05 | 0.003419 | 0 | 0        | 0        |
| 0        | 0        | 0 | 0        | 0        | 0.001907 | 0 | 0        | 0        |
| 0        | 0        | 0 | 0        | 0.000164 | 0.001381 | 0 | 0        | 0        |
| 0        | 0        | 0 | 0        | 0        | 0.001381 | 0 | 0        | 0        |
| 0        | 0        | 0 | 0        | 0        | 0.001183 | 0 | 0        | 0        |
| 3.29E-05 | 0        | 0 | 0        | 3.29E-05 | 0.001216 | 0 | 0        | 0        |
| 0        | 0        | 0 | 0.000789 | 0        | 0.001282 | 0 | 0        | 0        |
| 0        | 3.29E-05 | 0 | 0        | 0        | 0.000394 | 0 | 0        | 0        |
| 6.57E-05 | 0        | 0 | 0        | 0        | 0.000296 | 0 | 0        | 6.57E-05 |
| 0        | 0        | 0 | 0        | 0        | 0.00023  | 0 | 0        | 0.000197 |
| 6.57E-05 | 0        | 0 | 0        | 0        | 0.001414 | 0 | 0        | 0.000493 |
| 0        | 0        | 0 | 0        | 0        | 0.000953 | 0 | 0        | 9.86E-05 |
| 0        | 0        | 0 | 0        | 0        | 0.000756 | 0 | 0        | 0.00046  |
| 0        | 0        | 0 | 0        | 0        | 0.00023  | 0 | 0        | 6.57E-05 |
| 0        | 0        | 0 | 0        | 0        | 0.000362 | 0 | 0        | 0.00046  |
| 0        | 0        | 0 | 0        | 0        | 0.000657 | 0 | 0        | 0.00023  |
| 0.000131 | 0        | 0 | 0        | 0        | 0.000559 | 0 | 0        | 0.000197 |
| 0        | 0        | 0 | 0        | 0        | 0.001216 | 0 | 0        | 0.000657 |
| 6.57E-05 | 3.29E-05 | 0 | 6.57E-05 | 0        | 0.00023  | 0 | 0        | 0        |
| 0        | 0        | 0 | 0        | 0        | 0.00194  | 0 | 0        | 0        |
| 0        | 0        | 0 | 3.29E-05 | 0        | 0.000362 | 0 | 0        | 0        |
| 0        | 0        | 0 | 0        | 0        | 9.86E-05 | 0 | 0        | 0        |
| 0        | 0        | 0 | 0        | 0        | 0.000197 | 0 | 0        | 0        |
| 0        | 0        | 0 | 0        | 0        | 0.000789 | 0 | 0        | 0        |
| 0        | 0        | 0 | 0        | 0        | 0        | 0 | 0        | 0        |
| 0        | 0        | 0 | 0        | 0        | 0.001545 | 0 | 0        | 0        |
| 0        | 3.29E-05 | 0 | 0        | 0        | 0.002268 | 0 | 0        | 0        |
| 6.57E-05 | 0        | 0 | 0        | 0        | 6.57E-05 | 0 | 0        | 0        |
| 0        | 0        | 0 | 0        | 0        | 0.001775 | 0 | 0        | 0.000197 |
| 3.29E-05 | 0        | 0 | 0        | 0        | 0.001183 | 0 | 0        | 0.000526 |
| 0        | 0        | 0 | 0        | 0        | 0.000888 | 0 | 0        | 9.86E-05 |
| 0        | 0        | 0 | 0        | 0        | 0.002466 | 0 | 0        | 6.57E-05 |
| 0        | 0        | 0 | 9.86E-05 | 3.29E-05 | 0.001907 | 0 | 0        | 0        |
| 0        | 0        | 0 | 0        | 0        | 0.00046  | 0 | 0        | 0        |
| 0        | 0        | 0 | 0        | 3.29E-05 | 0.002071 | 0 | 0        | 0        |
| 0        | 0        | 0 | 0        | 0        | 0.000657 | 0 | 0        | 0        |
| 0        | 0        | 0 | 0        | 0        | 0.001545 | 0 | 0        | 0        |
| 0        | 0        | 0 | 6.57E-05 | 0        | 0.001348 | 0 | 0        | 0        |
| 0        | 0        | 0 | 0        | 0        | 0.000427 | 0 | 0        | 0        |
| 0        | 0        | 0 | 0        | 0        | 0.000329 | 0 | 0        | 0        |

|          |   |   |          |          |          |   |   |          |
|----------|---|---|----------|----------|----------|---|---|----------|
| 0        | 0 | 0 | 0        | 0.00023  | 0.002334 | 0 | 0 | 0        |
| 0        | 0 | 0 | 0        | 0        | 0.001216 | 0 | 0 | 0        |
| 3.29E-05 | 0 | 0 | 0        | 0        | 0.001052 | 0 | 0 | 0        |
| 0        | 0 | 0 | 0        | 0        | 0.001512 | 0 | 0 | 0        |
| 3.29E-05 | 0 | 0 | 0        | 0        | 0.000657 | 0 | 0 | 0        |
| 0.000197 | 0 | 0 | 0        | 0        | 0.000592 | 0 | 0 | 0        |
| 0        | 0 | 0 | 3.29E-05 | 0        | 0.001414 | 0 | 0 | 0        |
| 0        | 0 | 0 | 0        | 0        | 0.002104 | 0 | 0 | 0        |
| 0        | 0 | 0 | 0        | 0        | 0.001118 | 0 | 0 | 0        |
| 0        | 0 | 0 | 0        | 0        | 0.000657 | 0 | 0 | 0        |
| 0        | 0 | 0 | 0        | 0        | 0.001019 | 0 | 0 | 0        |
| 0        | 0 | 0 | 0        | 0        | 0.000131 | 0 | 0 | 0        |
| 0        | 0 | 0 | 0        | 0        | 0.001414 | 0 | 0 | 0        |
| 0        | 0 | 0 | 0.000329 | 0        | 0.003846 | 0 | 0 | 0        |
| 0        | 0 | 0 | 0        | 0        | 0.000263 | 0 | 0 | 0.00023  |
| 9.86E-05 | 0 | 0 | 0        | 0        | 0.000296 | 0 | 0 | 0.000131 |
| 3.29E-05 | 0 | 0 | 0        | 0        | 0.00023  | 0 | 0 | 0        |
| 0        | 0 | 0 | 0        | 0        | 0.000164 | 0 | 0 | 0.000263 |
| 0        | 0 | 0 | 0        | 0.000164 | 0.000394 | 0 | 0 | 0.000362 |
| 0        | 0 | 0 | 0.000131 | 0        | 9.86E-05 | 0 | 0 | 0        |
| 0        | 0 | 0 | 0        | 0        | 0.000427 | 0 | 0 | 0.001578 |
| 0        | 0 | 0 | 0        | 3.29E-05 | 0.000756 | 0 | 0 | 0.000164 |
| 0        | 0 | 0 | 0        | 0        | 0.00046  | 0 | 0 | 0        |

| k_Bacteri |
|-----------|-----------|-----------|-----------|-----------|-----------|-----------|-----------|-----------|
| 0         | 6.57E-05  | 0         | 0         | 0         | 0         | 0         | 0         | 0         |
| 0         | 0         | 0         | 0         | 0         | 0         | 0         | 9.86E-05  | 0         |
| 0         | 0         | 0         | 0         | 0         | 0         | 0         | 0         | 0         |
| 0         | 0         | 0         | 3.29E-05  | 0         | 0         | 0         | 0         | 0         |
| 0         | 0         | 0         | 6.57E-05  | 3.29E-05  | 0         | 0         | 0         | 0         |
| 0         | 0         | 0         | 0         | 0         | 0         | 0         | 0         | 0         |
| 0         | 0         | 0         | 0         | 0         | 0         | 0         | 0.000888  | 0         |
| 0         | 0         | 0         | 0         | 0         | 0         | 0         | 0         | 0         |
| 0         | 0.000394  | 0         | 0         | 0         | 0         | 0         | 0.000296  | 0         |
| 0         | 0         | 0         | 0         | 0         | 0         | 0         | 0         | 0         |
| 0         | 0         | 0         | 0         | 0         | 0         | 0         | 0.000394  | 0         |
| 0         | 0         | 0         | 0.000197  | 0         | 0         | 0         | 0         | 0         |
| 0         | 0         | 0         | 0.000394  | 0         | 6.57E-05  | 0         | 0.000756  | 0         |
| 0         | 0         | 0         | 0         | 0.000526  | 0         | 0         | 0.000263  | 0         |
| 0         | 0.000131  | 0         | 0         | 0.00023   | 0         | 0         | 0.000723  | 0         |
| 0         | 0         | 0         | 0         | 0         | 0         | 0         | 0.000427  | 0         |
| 0         | 0         | 0         | 0         | 0.000592  | 0         | 0         | 0         | 0         |
| 0         | 0         | 0         | 6.57E-05  | 0         | 0         | 0         | 0         | 0         |
| 0         | 0         | 0         | 0         | 9.86E-05  | 0         | 0         | 0         | 0         |
| 0         | 0         | 0         | 3.29E-05  | 0         | 0         | 0         | 0         | 0         |
| 0         | 0         | 0         | 0.002268  | 0         | 0         | 0         | 0.00023   | 0         |
| 0         | 0         | 0         | 0.000263  | 3.29E-05  | 0         | 0         | 0         | 0         |
| 0         | 0         | 0         | 0.001677  | 0         | 0         | 0         | 9.86E-05  | 0         |
| 0         | 0         | 0         | 0.001644  | 0         | 0         | 0         | 0         | 0         |
| 0         | 0         | 0         | 0.001578  | 0         | 0         | 0         | 0         | 0         |
| 0         | 0         | 0         | 0.000526  | 0         | 0         | 0         | 0         | 0         |
| 0         | 3.29E-05  | 0         | 9.86E-05  | 0         | 0         | 0         | 0         | 0         |
| 0         | 0         | 0         | 0         | 0         | 0         | 0         | 0         | 0         |
| 0         | 0         | 0         | 0         | 0         | 0         | 0         | 6.57E-05  | 0         |
| 0         | 0         | 0         | 0         | 0         | 0         | 0         | 3.29E-05  | 0         |
| 0         | 0         | 0         | 0         | 0         | 0         | 0         | 0         | 0         |
| 0         | 0         | 0         | 6.57E-05  | 0         | 0         | 0         | 0         | 0         |
| 0         | 3.29E-05  | 0         | 0         | 3.29E-05  | 0.000131  | 0         | 9.86E-05  | 0         |
| 0.000888  | 0         | 0         | 0.00046   | 0.00069   | 0         | 0.000164  | 0         | 0         |
| 0         | 0         | 0         | 0.002827  | 0.001151  | 0         | 0.000197  | 0         | 0         |
| 0         | 0         | 0         | 0.000592  | 0.000296  | 0         | 0         | 0         | 0         |
| 0.00023   | 0         | 0         | 0.000394  | 0.001118  | 0         | 0         | 0.000329  | 0         |
| 0         | 0         | 0         | 9.86E-05  | 3.29E-05  | 0         | 0         | 0         | 0         |
| 9.86E-05  | 0         | 0         | 0.000131  | 0.00263   | 0         | 0         | 0         | 0         |
| 3.29E-05  | 0         | 0         | 0.000296  | 0.001348  | 0         | 0         | 0         | 0         |
| 0.001348  | 0         | 0         | 0.000888  | 0.001709  | 0         | 0         | 0         | 0.000362  |
| 0         | 0         | 0         | 6.57E-05  | 0.00069   | 0         | 0         | 0         | 0         |
| 3.29E-05  | 0         | 0         | 0.000362  | 0.000296  | 0         | 0         | 0         | 0         |
| 0         | 0         | 0         | 0.004011  | 0         | 0         | 0         | 0         | 0         |

|          |          |   |          |          |          |   |          |          |
|----------|----------|---|----------|----------|----------|---|----------|----------|
| 0.00309  | 3.29E-05 | 0 | 0        | 0.003123 | 0        | 0 | 0        | 0        |
| 0.000855 | 0        | 0 | 0        | 0.002137 | 0        | 0 | 0        | 0        |
| 0.001151 | 0        | 0 | 0.000756 | 0.000164 | 0        | 0 | 0        | 0        |
| 0.001019 | 0        | 0 | 0.006772 | 0.000296 | 0        | 0 | 0        | 0        |
| 0.000131 | 0        | 0 | 0.002827 | 6.57E-05 | 0        | 0 | 0        | 0        |
| 0        | 0        | 0 | 3.29E-05 | 0        | 0        | 0 | 0        | 0        |
| 0        | 0        | 0 | 9.86E-05 | 3.29E-05 | 0        | 0 | 0        | 0        |
| 0.00023  | 0        | 0 | 0.000296 | 0.000329 | 0        | 0 | 0        | 0        |
| 0.001052 | 0        | 0 | 0.002071 | 0.001775 | 0        | 0 | 0        | 0        |
| 0        | 0        | 0 | 0        | 0.000164 | 0        | 0 | 6.57E-05 | 0        |
| 0        | 0        | 0 | 0.001118 | 0        | 0        | 0 | 0.003057 | 0        |
| 0        | 0        | 0 | 0        | 0        | 0        | 0 | 0        | 0        |
| 0.000362 | 0        | 0 | 0        | 0        | 0        | 0 | 0        | 0        |
| 0.000296 | 0        | 0 | 0        | 0        | 0        | 0 | 0        | 0        |
| 0.00046  | 0        | 0 | 0.00046  | 0.000526 | 0        | 0 | 0        | 6.57E-05 |
| 0        | 0        | 0 | 0.001315 | 0        | 0        | 0 | 0        | 0        |
| 0.000263 | 0        | 0 | 3.29E-05 | 0.000723 | 0        | 0 | 0        | 0        |
| 6.57E-05 | 0        | 0 | 0        | 0.000427 | 0        | 0 | 0        | 0        |
| 0        | 0        | 0 | 0        | 0.002005 | 0        | 0 | 0        | 0        |
| 6.57E-05 | 0        | 0 | 0        | 6.57E-05 | 0        | 0 | 6.57E-05 | 0        |
| 0        | 0        | 0 | 0        | 0        | 0        | 0 | 0.000329 | 0        |
| 0        | 0        | 0 | 0        | 0        | 0        | 0 | 0        | 0        |
| 0        | 0        | 0 | 0        | 0.00046  | 0        | 0 | 0        | 0        |
| 0        | 0        | 0 | 0.000131 | 0        | 0        | 0 | 0        | 0        |
| 3.29E-05 | 0.000197 | 0 | 0.00046  | 0        | 0        | 0 | 0        | 0        |
| 0        | 0        | 0 | 6.57E-05 | 3.29E-05 | 0        | 0 | 0        | 0        |
| 0        | 0.001052 | 0 | 0.001019 | 0.00092  | 0        | 0 | 3.29E-05 | 0        |
| 0        | 0.000329 | 0 | 0        | 9.86E-05 | 0        | 0 | 0        | 0        |
| 0        | 0        | 0 | 0.000131 | 0.00023  | 0        | 0 | 0.000263 | 0        |
| 0        | 0        | 0 | 6.57E-05 | 0.000164 | 0        | 0 | 0        | 0        |
| 0        | 0        | 0 | 0        | 0.002104 | 0        | 0 | 0        | 0        |
| 0        | 0        | 0 | 0        | 0.001414 | 0        | 0 | 0        | 0        |
| 0        | 0        | 0 | 0        | 0.002761 | 0        | 0 | 0        | 0        |
| 0        | 0        | 0 | 0        | 0.003452 | 0        | 0 | 0        | 0        |
| 0.000362 | 0        | 0 | 0        | 0.000953 | 0        | 0 | 0        | 0        |
| 0.000756 | 0        | 0 | 0        | 0.004142 | 0        | 0 | 9.86E-05 | 0        |
| 0        | 0        | 0 | 0.000855 | 0        | 0        | 0 | 0.000427 | 0        |
| 0        | 0        | 0 | 0        | 0        | 0        | 0 | 0.001381 | 0        |
| 0.00046  | 0        | 0 | 0.000329 | 0.000493 | 0.000559 | 0 | 0        | 0        |
| 0.000197 | 0        | 0 | 0.000493 | 0.001052 | 0        | 0 | 0        | 0        |
| 0.000263 | 0        | 0 | 0        | 0.001085 | 0        | 0 | 0.000131 | 0        |
| 0.000986 | 0        | 0 | 0.000723 | 0        | 0        | 0 | 6.57E-05 | 0        |
| 0.000559 | 0        | 0 | 0        | 0.001118 | 0        | 0 | 0        | 0        |
| 0        | 0        | 0 | 0        | 0        | 0        | 0 | 0.001972 | 0        |
| 0        | 0        | 0 | 0        | 3.29E-05 | 0.002334 | 0 | 0        | 0        |
| 0        | 0        | 0 | 0        | 0.000394 | 0        | 0 | 0        | 0        |
| 0        | 0        | 0 | 0.00046  | 6.57E-05 | 0        | 0 | 0        | 0        |

|          |          |   |          |          |          |          |          |   |
|----------|----------|---|----------|----------|----------|----------|----------|---|
| 0        | 0        | 0 | 0.000855 | 0.000427 | 0        | 0        | 0        | 0 |
| 0        | 0        | 0 | 0.003748 | 0.000559 | 0        | 0        | 0        | 0 |
| 0        | 0        | 0 | 0.002334 | 0.000394 | 0        | 0        | 0        | 0 |
| 0.00023  | 0        | 0 | 0.000822 | 0.000427 | 0        | 0        | 0        | 0 |
| 0        | 0        | 0 | 0.001644 | 0.000592 | 0        | 0        | 0        | 0 |
| 0        | 0        | 0 | 0.000526 | 6.57E-05 | 0        | 0        | 9.86E-05 | 0 |
| 0        | 0        | 0 | 0.000164 | 6.57E-05 | 0        | 0        | 9.86E-05 | 0 |
| 0        | 0        | 0 | 0.001446 | 0.000592 | 0        | 0        | 0        | 0 |
| 0        | 0        | 0 | 0.000625 | 0.000427 | 0        | 0        | 0        | 0 |
| 0        | 0        | 0 | 0.000592 | 0.000362 | 0        | 0        | 0        | 0 |
| 0        | 0        | 0 | 0.001019 | 0.00092  | 3.29E-05 | 0        | 0        | 0 |
| 0        | 0        | 0 | 0.000723 | 0.00069  | 0        | 0        | 3.29E-05 | 0 |
| 0        | 0        | 0 | 0        | 0        | 0        | 0        | 0.003511 | 0 |
| 0        | 0        | 0 | 0        | 0        | 0        | 0        | 0        | 0 |
| 0        | 0        | 0 | 3.29E-05 | 0        | 0        | 0        | 0.000296 | 0 |
| 0        | 0        | 0 | 0        | 0        | 0        | 3.29E-05 | 0.000427 | 0 |
| 0        | 0.00023  | 0 | 0        | 3.29E-05 | 0.000296 | 0        | 0.000296 | 0 |
| 0        | 0        | 0 | 0        | 0        | 0        | 0        | 0        | 0 |
| 0        | 0        | 0 | 0        | 0        | 0        | 0        | 0        | 0 |
| 0        | 0        | 0 | 0        | 0        | 0        | 0        | 0        | 0 |
| 0        | 0.000625 | 0 | 0        | 0        | 0        | 0        | 0.000394 | 0 |
| 0.000197 | 0        | 0 | 0.000986 | 0.000394 | 0        | 0        | 0        | 0 |
| 0        | 0        | 0 | 0.000131 | 6.57E-05 | 0        | 0        | 0        | 0 |
| 0.00023  | 0        | 0 | 0.000362 | 0.00092  | 0        | 0        | 0        | 0 |
| 0.000131 | 0        | 0 | 0.00023  | 0.000263 | 0        | 0        | 0        | 0 |
| 0        | 0        | 0 | 0.001381 | 0.000394 | 0        | 0        | 0        | 0 |
| 0        | 0        | 0 | 0.000263 | 9.86E-05 | 0        | 0        | 0        | 0 |
| 0        | 0        | 0 | 0.021368 | 0.000855 | 0        | 0        | 0        | 0 |
| 0        | 0        | 0 | 0        | 3.29E-05 | 0        | 0        | 0        | 0 |
| 0        | 0        | 0 | 0.000197 | 0        | 0        | 0        | 0        | 0 |
| 0        | 0        | 0 | 6.57E-05 | 3.29E-05 | 0        | 0        | 0        | 0 |
| 0.000427 | 0        | 0 | 0.002301 | 0.001282 | 0        | 0        | 0        | 0 |
| 0        | 0        | 0 | 0        | 0.004438 | 0        | 0        | 9.86E-05 | 0 |
| 0.000394 | 0        | 0 | 0.000723 | 0.002663 | 0        | 6.57E-05 | 0        | 0 |
| 0.00023  | 0        | 0 | 0.002235 | 0.001183 | 0        | 0.000362 | 0        | 0 |
| 0.000329 | 0        | 0 | 0.000394 | 0.000592 | 0        | 0        | 0        | 0 |
| 0.000131 | 0        | 0 | 0.000657 | 0.002597 | 0        | 0        | 9.86E-05 | 0 |
| 0.000296 | 0        | 0 | 0.000329 | 0.000263 | 0        | 0        | 0        | 0 |
| 6.57E-05 | 0        | 0 | 0.00069  | 0.000592 | 0        | 0        | 0        | 0 |
| 6.57E-05 | 0        | 0 | 0.000822 | 0.000592 | 0        | 3.29E-05 | 0        | 0 |
| 0.001282 | 0        | 0 | 0.000164 | 0.000822 | 0        | 0.000394 | 0        | 0 |
| 0.001019 | 0        | 0 | 9.86E-05 | 0.001446 | 0        | 0.000197 | 0.000164 | 0 |
| 0.000329 | 0        | 0 | 9.86E-05 | 0.000197 | 0        | 6.57E-05 | 0        | 0 |
| 0.000296 | 0        | 0 | 0.002827 | 0.00092  | 0        | 0        | 0        | 0 |
| 0.001282 | 0        | 0 | 0.005293 | 0.002137 | 0        | 0        | 6.57E-05 | 0 |
| 0.000789 | 0        | 0 | 0.001972 | 0.002334 | 0        | 0        | 0        | 0 |
| 0.000131 | 0        | 0 | 0.002005 | 0.001052 | 0        | 0        | 0        | 0 |



|          |          |   |          |          |          |          |          |          |
|----------|----------|---|----------|----------|----------|----------|----------|----------|
| 0.000592 | 0        | 0 | 0.002301 | 0.001709 | 0        | 0        | 0        | 0        |
| 0        | 0        | 0 | 0.001709 | 0        | 0        | 3.29E-05 | 0        | 0        |
| 0        | 0        | 0 | 0.005161 | 0        | 0        | 0.000197 | 0        | 0        |
| 0        | 0        | 0 | 0.002794 | 0        | 0        | 0        | 0        | 0        |
| 0        | 0        | 0 | 0.00069  | 0.000131 | 0        | 3.29E-05 | 0        | 0        |
| 0        | 0        | 0 | 0        | 0.006706 | 0        | 0        | 0        | 0        |
| 0        | 0        | 0 | 3.29E-05 | 0.003156 | 0        | 0        | 0        | 0        |
| 0        | 0        | 0 | 0        | 0.001216 | 0        | 0        | 0.00023  | 0        |
| 0        | 0        | 0 | 0        | 0.001052 | 0        | 0        | 9.86E-05 | 0        |
| 0        | 0        | 0 | 0        | 0.002663 | 0        | 0        | 0        | 0        |
| 0        | 0        | 0 | 0        | 0        | 0        | 0        | 0        | 0        |
| 0        | 0        | 0 | 0        | 0        | 0        | 0        | 0        | 0        |
| 0        | 0        | 0 | 0        | 0        | 0        | 0        | 0.000164 | 0        |
| 0        | 0.000197 | 0 | 0        | 0        | 0        | 0        | 0.000723 | 0        |
| 0        | 0        | 0 | 0        | 0        | 0        | 0        | 0        | 0        |
| 6.57E-05 | 0        | 0 | 0        | 0        | 0        | 0        | 0        | 0        |
| 0        | 0        | 0 | 0        | 0        | 0        | 0        | 0        | 0        |
| 0        | 0        | 0 | 3.29E-05 | 0        | 0        | 0        | 0        | 0        |
| 3.29E-05 | 0        | 0 | 0        | 0        | 0        | 0        | 0.000756 | 0        |
| 0        | 0.001446 | 0 | 0        | 0        | 0.000296 | 0        | 0        | 0        |
| 0        | 0        | 0 | 0        | 0        | 0        | 0        | 0.000197 | 0        |
| 9.86E-05 | 0        | 0 | 0.000559 | 0        | 0        | 0        | 0.000329 | 6.57E-05 |
| 0.000855 | 0        | 0 | 0.002334 | 0.001841 | 0        | 0        | 0        | 6.57E-05 |
| 0.001512 | 0        | 0 | 0.00194  | 0.001611 | 0        | 0        | 0.000131 | 0        |
| 0.000197 | 0        | 0 | 0.000164 | 0.001085 | 0        | 0        | 0.000394 | 0        |
| 9.86E-05 | 0        | 0 | 0.00046  | 0.00023  | 0        | 0        | 0.000657 | 0        |
| 0        | 0        | 0 | 6.57E-05 | 0.000263 | 0        | 0        | 0.000296 | 0        |
| 0        | 0        | 0 | 0.000789 | 0.000131 | 0        | 0        | 0        | 0        |
| 6.57E-05 | 0        | 0 | 0.00092  | 3.29E-05 | 0        | 0        | 0        | 0        |
| 0        | 6.57E-05 | 0 | 9.86E-05 | 0        | 0        | 0        | 0        | 0        |
| 0        | 0        | 0 | 6.57E-05 | 0.000164 | 0        | 0        | 3.29E-05 | 0        |
| 0        | 0        | 0 | 0.000855 | 0        | 0        | 0        | 0.001479 | 0        |
| 0.001677 | 0        | 0 | 0.001972 | 0.001611 | 0        | 0        | 0        | 0        |
| 6.57E-05 | 0        | 0 | 0.000131 | 0.000756 | 0        | 0        | 0        | 0        |
| 0        | 0        | 0 | 0.00069  | 0.001282 | 0        | 0        | 0        | 0        |
| 0        | 0        | 0 | 0.000329 | 0.000822 | 0        | 0        | 0        | 0        |
| 0        | 0        | 0 | 0.002893 | 0.000756 | 0        | 0        | 0        | 0        |
| 0        | 0        | 0 | 0.001414 | 0        | 0        | 0        | 9.86E-05 | 0        |
| 6.57E-05 | 0        | 0 | 0.000131 | 9.86E-05 | 0        | 0        | 0        | 0        |
| 0        | 0        | 0 | 0.003518 | 0        | 0        | 0        | 3.29E-05 | 0        |
| 0        | 0        | 0 | 0.00092  | 0        | 0        | 0        | 0        | 0        |
| 0        | 0        | 0 | 0.014004 | 0        | 0        | 0        | 0        | 0        |
| 0        | 0        | 0 | 0.003024 | 0        | 0        | 0        | 0        | 0        |
| 0        | 0        | 0 | 0.001907 | 0        | 0        | 0        | 0        | 0        |
| 0        | 0        | 0 | 0        | 0        | 0        | 0        | 0        | 0        |
| 0        | 0        | 0 | 0        | 0        | 0        | 0        | 0.000493 | 0        |

|          |          |   |          |          |          |          |          |          |
|----------|----------|---|----------|----------|----------|----------|----------|----------|
| 0        | 0        | 0 | 0        | 0        | 0        | 0        | 0        | 0        |
| 0        | 0        | 0 | 0        | 0        | 0        | 0        | 0        | 0        |
| 0        | 0        | 0 | 0        | 0        | 0        | 0        | 0.001677 | 0        |
| 0        | 0        | 0 | 0        | 0        | 0        | 0        | 0        | 0        |
| 0        | 0        | 0 | 0        | 0        | 0        | 0        | 0        | 0        |
| 0        | 0        | 0 | 0.000164 | 0        | 0        | 0        | 0.000263 | 0        |
| 0        | 0        | 0 | 0        | 0        | 0        | 0        | 0        | 0        |
| 0        | 0        | 0 | 3.29E-05 | 0        | 0        | 0        | 0        | 0        |
| 0        | 0        | 0 | 0        | 0        | 0        | 0        | 0.000164 | 0        |
| 0        | 0        | 0 | 0        | 0        | 0        | 0        | 0        | 0        |
| 0        | 0        | 0 | 0        | 0        | 0        | 0        | 0        | 0        |
| 0.000296 | 0        | 0 | 0.001315 | 0.002498 | 0        | 0        | 0        | 0        |
| 0        | 0        | 0 | 0.000197 | 0.000197 | 0        | 0        | 9.86E-05 | 0        |
| 0.000625 | 0        | 0 | 0.003846 | 0.000197 | 0        | 6.57E-05 | 0        | 3.29E-05 |
| 9.86E-05 | 0        | 0 | 0.000657 | 0.000394 | 0        | 6.57E-05 | 0.00023  | 0.000263 |
| 0        | 0        | 0 | 9.86E-05 | 0.001019 | 0        | 0        | 0.00023  | 0        |
| 0        | 0        | 0 | 0        | 9.86E-05 | 0        | 0        | 9.86E-05 | 0        |
| 0        | 0.000362 | 0 | 0        | 0.000329 | 0        | 0        | 0.000296 | 0        |
| 0        | 3.29E-05 | 0 | 0        | 0        | 0        | 0        | 0        | 0        |
| 0        | 0        | 0 | 0        | 0        | 0        | 0        | 0.00092  | 0        |
| 0        | 0        | 0 | 0        | 0        | 0        | 0        | 9.86E-05 | 0        |
| 0        | 0.000164 | 0 | 0.000362 | 0        | 0        | 0        | 0.000296 | 0        |
| 6.57E-05 | 0        | 0 | 0        | 3.29E-05 | 0        | 0        | 0        | 0        |
| 3.29E-05 | 0        | 0 | 0        | 6.57E-05 | 0        | 0        | 0        | 0        |
| 0        | 0        | 0 | 0.000197 | 0.000164 | 0        | 0        | 0        | 0        |
| 9.86E-05 | 0        | 0 | 0.000164 | 9.86E-05 | 0        | 0        | 0.001841 | 0        |
| 0        | 0        | 0 | 0.000657 | 0.000723 | 0        | 0        | 0        | 0        |
| 9.86E-05 | 0        | 0 | 0.00069  | 0.000789 | 0        | 0        | 0        | 0        |
| 0.002367 | 0        | 0 | 0.000131 | 0.003912 | 6.57E-05 | 0        | 0        | 0        |
| 9.86E-05 | 0        | 0 | 0        | 0.000625 | 0        | 0        | 9.86E-05 | 0        |
| 0        | 9.86E-05 | 0 | 0.000657 | 0.002433 | 0        | 0        | 0        | 0        |
| 0        | 0        | 0 | 0        | 0        | 0        | 0        | 3.29E-05 | 0        |
| 0        | 0        | 0 | 0        | 0        | 0        | 0        | 0        | 0        |
| 0        | 0        | 0 | 0.000625 | 0.000362 | 0        | 3.29E-05 | 0        | 0        |
| 0        | 0        | 0 | 0.002038 | 0.00332  | 0        | 0        | 0.000493 | 0        |
| 0        | 3.29E-05 | 0 | 0.00023  | 0.00069  | 0        | 0        | 0        | 0        |
| 0        | 0        | 0 | 0.002794 | 0.011868 | 0        | 0        | 0        | 0        |
| 0        | 0        | 0 | 0.00023  | 0.001019 | 0        | 0        | 3.29E-05 | 0        |
| 0.000131 | 0        | 0 | 0.000822 | 0.000756 | 0        | 0        | 0.00023  | 0        |
| 0.000131 | 0        | 0 | 0.00194  | 0.00046  | 0        | 0        | 0        | 3.29E-05 |
| 0.000394 | 0        | 0 | 0.001479 | 0.001414 | 0        | 9.86E-05 | 0        | 6.57E-05 |
| 0.006016 | 0        | 0 | 0        | 0.000164 | 0        | 0        | 0.000362 | 9.86E-05 |
| 0.000394 | 0        | 0 | 0.000131 | 0.000888 | 0        | 9.86E-05 | 9.86E-05 | 3.29E-05 |
| 0.001052 | 0        | 0 | 0.000131 | 0.001315 | 0        | 0.000131 | 0        | 9.86E-05 |
| 0.001151 | 0        | 0 | 6.57E-05 | 0.001414 | 0        | 0.000559 | 0        | 0        |
| 0.000822 | 0.000329 | 0 | 0.00023  | 0.000657 | 0        | 0.000131 | 0.000329 | 0        |
| 0.001151 | 0.000789 | 0 | 0        | 9.86E-05 | 0        | 0        | 0.001742 | 0        |

|          |          |          |          |          |   |          |          |   |
|----------|----------|----------|----------|----------|---|----------|----------|---|
| 0.000164 | 0        | 0        | 0        | 0.000625 | 0 | 0        | 0.000394 | 0 |
| 0        | 0        | 0        | 0.000131 | 0.000394 | 0 | 0        | 0.000362 | 0 |
| 0.000822 | 6.57E-05 | 0        | 0.000164 | 0.000427 | 0 | 0        | 0        | 0 |
| 0        | 0        | 0        | 0        | 0        | 0 | 0        | 0        | 0 |
| 0        | 0        | 0        | 0        | 0        | 0 | 0        | 0        | 0 |
| 0        | 0        | 0        | 0        | 0        | 0 | 0        | 0.00092  | 0 |
| 6.57E-05 | 0        | 0        | 0.001118 | 0        | 0 | 0        | 0        | 0 |
| 0        | 0        | 0        | 0        | 0        | 0 | 0        | 0        | 0 |
| 0        | 0        | 0        | 0        | 0        | 0 | 0        | 0        | 0 |
| 0.000592 | 0        | 0        | 0        | 0.000427 | 0 | 0        | 0        | 0 |
| 0        | 0        | 0        | 0        | 0        | 0 | 0        | 0        | 0 |
| 0        | 0        | 0        | 0.000559 | 3.29E-05 | 0 | 0        | 0        | 0 |
| 0        | 0        | 0.000855 | 0        | 0.000559 | 0 | 0        | 0.001446 | 0 |
| 0.000131 | 0        | 0        | 0.00023  | 0        | 0 | 0        | 0.000164 | 0 |
| 0.002564 | 0        | 0        | 0.005589 | 0.002992 | 0 | 0        | 0        | 0 |
| 0.001414 | 0        | 0        | 0.006608 | 0.002334 | 0 | 0        | 0        | 0 |
| 0.001545 | 0        | 0        | 0.0048   | 0.002761 | 0 | 0        | 0        | 0 |
| 0.000296 | 6.57E-05 | 0        | 0.001775 | 0.000559 | 0 | 0        | 0        | 0 |
| 0.000559 | 0        | 0        | 0.003879 | 0.000986 | 0 | 0        | 0        | 0 |
| 0.001742 | 0        | 0        | 0.004175 | 0.003057 | 0 | 0        | 0        | 0 |
| 0.000526 | 0        | 0        | 0.003485 | 0.001644 | 0 | 0        | 0        | 0 |
| 0.000427 | 0        | 0        | 0.002696 | 0.001151 | 0 | 0        | 0        | 0 |
| 0.000526 | 0        | 0        | 0.002367 | 0.000329 | 0 | 0        | 0        | 0 |
| 0        | 0        | 0        | 0.006476 | 0        | 0 | 0        | 0        | 0 |
| 0        | 0        | 0        | 0        | 3.29E-05 | 0 | 0        | 0        | 0 |
| 0        | 0        | 0        | 0        | 0.000427 | 0 | 0        | 0.000164 | 0 |
| 0        | 0        | 0        | 0        | 0        | 0 | 0        | 0        | 0 |
| 0        | 0        | 0        | 0        | 6.57E-05 | 0 | 0        | 0        | 0 |
| 0        | 0        | 0        | 0.000888 | 9.86E-05 | 0 | 0        | 0.000329 | 0 |
| 0        | 0        | 0        | 0        | 0        | 0 | 0        | 0        | 0 |
| 0        | 0        | 0        | 0        | 0        | 0 | 0        | 3.29E-05 | 0 |
| 0        | 0        | 0        | 0        | 3.29E-05 | 0 | 0        | 0        | 0 |
| 0        | 0        | 0        | 9.86E-05 | 0        | 0 | 0        | 0.000362 | 0 |
| 0        | 0        | 0        | 0        | 0        | 0 | 0        | 0        | 0 |
| 0        | 0        | 0        | 0.000197 | 0.000394 | 0 | 3.29E-05 | 0        | 0 |
| 0        | 0        | 0        | 0.000394 | 0.001249 | 0 | 9.86E-05 | 9.86E-05 | 0 |
| 0.000329 | 0        | 0        | 0.001052 | 0.000657 | 0 | 0.000131 | 0.000263 | 0 |
| 6.57E-05 | 0        | 0        | 0.000164 | 0.001085 | 0 | 0        | 0        | 0 |
| 3.29E-05 | 0        | 0        | 0        | 6.57E-05 | 0 | 0        | 0        | 0 |
| 3.29E-05 | 0        | 0        | 0.000625 | 0.000592 | 0 | 0        | 0.000131 | 0 |
| 6.57E-05 | 0        | 0        | 0.000822 | 0.00092  | 0 | 0        | 0        | 0 |
| 0.000131 | 0        | 0        | 0.001907 | 0.000592 | 0 | 0        | 0.000394 | 0 |
| 0        | 0        | 0        | 3.29E-05 | 0        | 0 | 0        | 0        | 0 |
| 6.57E-05 | 0.000164 | 0        | 0.000164 | 0.000131 | 0 | 0        | 0        | 0 |
| 6.57E-05 | 0        | 0        | 6.57E-05 | 3.29E-05 | 0 | 0        | 0        | 0 |
| 0        | 0        | 0        | 0.000296 | 6.57E-05 | 0 | 0        | 0        | 0 |
| 6.57E-05 | 0        | 0        | 9.86E-05 | 3.29E-05 | 0 | 0        | 3.29E-05 | 0 |

|          |          |   |          |          |          |          |          |          |
|----------|----------|---|----------|----------|----------|----------|----------|----------|
| 0.000625 | 0        | 0 | 0.000888 | 0.001545 | 0        | 0        | 0        | 0        |
| 0.000197 | 0        | 0 | 0.000362 | 0.00023  | 0        | 0        | 0        | 0        |
| 0.000131 | 3.29E-05 | 0 | 0.000263 | 0.000197 | 0        | 0        | 0        | 0        |
| 0        | 0        | 0 | 0.005161 | 0.003813 | 0        | 0        | 0        | 0        |
| 0.000756 | 0        | 0 | 3.29E-05 | 0.005326 | 0        | 0        | 0        | 0        |
| 0        | 0        | 0 | 0.00023  | 0.002104 | 0        | 0        | 6.57E-05 | 0        |
| 0.003419 | 0        | 0 | 0.003024 | 9.86E-05 | 0        | 3.29E-05 | 0.00046  | 0.000526 |
| 0.004405 | 0        | 0 | 0.002761 | 9.86E-05 | 0        | 0.000953 | 6.57E-05 | 0        |
| 0.000296 | 0        | 0 | 0.002005 | 0.002301 | 0        | 0.004898 | 0        | 3.29E-05 |
| 0.001742 | 0        | 0 | 0.001677 | 0.000822 | 0        | 0.000329 | 0        | 0.000164 |
| 6.57E-05 | 0        | 0 | 0.001479 | 9.86E-05 | 0        | 9.86E-05 | 3.29E-05 | 6.57E-05 |
| 0.000526 | 0        | 0 | 0.001183 | 0.000296 | 0        | 0.000329 | 0.000131 | 6.57E-05 |
| 0.00526  | 0        | 0 | 0.001348 | 0.000625 | 0        | 0.001381 | 0        | 0.000526 |
| 0        | 0        | 0 | 0.000822 | 0.001085 | 0        | 0.001348 | 0        | 0.000657 |
| 0        | 0        | 0 | 0        | 0.000197 | 0        | 0        | 0        | 0        |
| 0        | 0        | 0 | 0        | 0.000131 | 0        | 0        | 3.29E-05 | 0        |
| 0        | 0.000296 | 0 | 0        | 0        | 0.000296 | 0        | 6.57E-05 | 0        |
| 6.57E-05 | 0        | 0 | 3.29E-05 | 3.29E-05 | 0        | 0        | 0        | 0        |
| 0        | 0        | 0 | 0        | 0        | 0        | 0        | 0        | 0        |
| 0        | 0        | 0 | 0        | 6.57E-05 | 0        | 0        | 0        | 0        |
| 0        | 0        | 0 | 0        | 0.00023  | 0        | 0        | 0        | 0        |
| 0        | 0        | 0 | 0        | 6.57E-05 | 0        | 0        | 0        | 0        |
| 0        | 0        | 0 | 0        | 0.000131 | 0        | 0        | 0        | 0        |
| 0        | 0        | 0 | 0        | 0        | 0        | 0        | 0        | 0        |
| 0        | 0        | 0 | 0        | 0        | 0        | 0        | 0        | 0        |
| 0        | 0        | 0 | 0        | 0        | 0        | 0        | 0        | 0        |
| 9.86E-05 | 0        | 0 | 0        | 0        | 0        | 0        | 3.29E-05 | 0        |
| 0.000131 | 0        | 0 | 0        | 0        | 0        | 0        | 0        | 0        |
| 0.001052 | 0        | 0 | 0.000131 | 0.001709 | 0        | 0        | 0        | 0        |
| 3.29E-05 | 0        | 0 | 3.29E-05 | 3.29E-05 | 0        | 0        | 0.000131 | 0        |
| 0        | 0        | 0 | 6.57E-05 | 6.57E-05 | 0        | 0        | 0        | 0        |
| 0        | 0        | 0 | 0        | 0        | 0        | 0        | 0.000131 | 0        |
| 0.001151 | 0        | 0 | 0        | 0.001644 | 0        | 0        | 0        | 0        |
| 0.000493 | 0        | 0 | 0        | 0.000723 | 0        | 0        | 0        | 0        |
| 6.57E-05 | 0        | 0 | 0        | 3.29E-05 | 0        | 0        | 0        | 0        |
| 3.29E-05 | 0        | 0 | 0        | 0        | 0        | 0        | 0.000197 | 0        |
| 0        | 0        | 0 | 0.000493 | 0.0024   | 0        | 0        | 0.000953 | 0        |
| 0        | 0        | 0 | 3.29E-05 | 0.000164 | 0        | 0        | 0.000789 | 0        |
| 0        | 0        | 0 | 3.29E-05 | 0.000329 | 0        | 0        | 0        | 0        |
| 0        | 0        | 0 | 0.000131 | 0.000756 | 0        | 0        | 0.00023  | 0        |
| 0        | 0        | 0 | 9.86E-05 | 0.001414 | 0        | 0        | 0        | 0        |
| 0        | 0        | 0 | 3.29E-05 | 0.000723 | 0        | 0        | 0        | 0        |
| 0        | 0        | 0 | 0        | 0.00023  | 0        | 0        | 0        | 0        |
| 0        | 0        | 0 | 0        | 0.000263 | 0        | 0        | 0        | 0        |
| 0        | 0        | 0 | 0.000723 | 0        | 0        | 0        | 0        | 0        |
| 0        | 0        | 0 | 0        | 3.29E-05 | 0        | 0        | 0        | 0        |
| 0.000197 | 0        | 0 | 0.000559 | 0.001019 | 0        | 0.00023  | 6.57E-05 | 0        |

|          |          |          |          |          |          |          |          |   |
|----------|----------|----------|----------|----------|----------|----------|----------|---|
| 0.000526 | 0        | 0        | 0.003485 | 0.002893 | 0        | 0        | 0        | 0 |
| 0.000493 | 0        | 0        | 0.001446 | 0.002531 | 3.29E-05 | 6.57E-05 | 6.57E-05 | 0 |
| 6.57E-05 | 0        | 0        | 0.003123 | 0.000197 | 0        | 0        | 0        | 0 |
| 0.000789 | 0        | 0        | 0.006838 | 0.003024 | 0        | 0        | 0        | 0 |
| 0.00046  | 0        | 0        | 0.003287 | 0.001381 | 0        | 0        | 0        | 0 |
| 0.000756 | 0        | 0        | 0.000822 | 0.001545 | 0        | 0        | 3.29E-05 | 0 |
| 6.57E-05 | 0        | 0        | 0.001742 | 0.000493 | 0        | 0        | 0        | 0 |
| 3.29E-05 | 0        | 0        | 0.001808 | 0.000197 | 0        | 0        | 0        | 0 |
| 0.00023  | 0        | 0        | 0.003813 | 0.000559 | 0        | 0        | 0        | 0 |
| 0.000362 | 0        | 0        | 0.002038 | 0.000559 | 0        | 0        | 0        | 0 |
| 0        | 0        | 0        | 0.002729 | 0.000394 | 0        | 0        | 0        | 0 |
| 9.86E-05 | 0        | 0        | 0        | 0.00023  | 0        | 0        | 0        | 0 |
| 0.000362 | 0        | 0        | 0.001972 | 0.002203 | 0        | 0        | 0        | 0 |
| 0        | 6.57E-05 | 0        | 0.001216 | 0.000953 | 0        | 0        | 0        | 0 |
| 0.00023  | 0        | 0        | 0.004865 | 0.001907 | 0        | 0        | 0        | 0 |
| 0        | 0        | 0        | 0.00023  | 0.000493 | 0        | 0        | 0        | 0 |
| 0        | 0        | 0        | 0.003912 | 6.57E-05 | 0        | 0        | 0        | 0 |
| 0        | 0        | 0        | 0.003978 | 0.000296 | 0        | 0        | 0        | 0 |
| 0        | 0        | 0        | 0.001479 | 0.000164 | 0        | 0        | 0.000197 | 0 |
| 0        | 0        | 0        | 0.000131 | 0.000362 | 0        | 0        | 0.000131 | 0 |
| 0        | 0        | 0        | 0.000164 | 0.000164 | 0        | 0        | 0        | 0 |
| 0.000427 | 3.29E-05 | 0        | 0.000394 | 0.000789 | 0        | 0        | 3.29E-05 | 0 |
| 0        | 0        | 0        | 0.000625 | 6.57E-05 | 0        | 0        | 0        | 0 |
| 9.86E-05 | 0        | 0        | 0        | 0.000197 | 0        | 0        | 0        | 0 |
| 0.000296 | 0        | 0        | 3.29E-05 | 0.000197 | 0        | 0        | 0        | 0 |
| 0.000131 | 0        | 0        | 6.57E-05 | 0.000493 | 0        | 0        | 0        | 0 |
| 0.000493 | 0        | 0        | 0.001545 | 0.001907 | 0        | 0        | 0        | 0 |
| 0.00023  | 0        | 0        | 0        | 6.57E-05 | 0        | 0        | 0        | 0 |
| 0        | 0        | 3.29E-05 | 0        | 0.000164 | 0        | 0        | 0        | 0 |
| 0.000493 | 6.57E-05 | 0        | 0        | 0.001151 | 0        | 0        | 0        | 0 |
| 0.000855 | 0        | 0        | 0        | 0.00069  | 0        | 3.29E-05 | 0        | 0 |
| 0        | 0        | 0        | 0.002071 | 0        | 0        | 0        | 0        | 0 |
| 0        | 0        | 0        | 0.000592 | 0        | 0        | 0        | 3.29E-05 | 0 |
| 0        | 0        | 0        | 0        | 0        | 0        | 0        | 0        | 0 |
| 0        | 0        | 0        | 0        | 0        | 0        | 0        | 0        | 0 |
| 0        | 0        | 0        | 0        | 0        | 0        | 0        | 0        | 0 |
| 0        | 0        | 0        | 0        | 0.003945 | 0        | 0        | 0        | 0 |
| 6.57E-05 | 0        | 0        | 0.000526 | 0.000953 | 0        | 0        | 0        | 0 |
| 0        | 6.57E-05 | 0        | 0        | 0        | 0        | 0        | 0        | 0 |
| 0        | 0        | 0        | 0        | 3.29E-05 | 0        | 0        | 0        | 0 |
| 0        | 0        | 3.29E-05 | 0.000526 | 0        | 0        | 0        | 0        | 0 |
| 0        | 0        | 0        | 6.57E-05 | 0        | 0        | 0        | 0        | 0 |
| 0        | 0        | 0        | 0.001545 | 6.57E-05 | 0        | 0        | 0        | 0 |
| 0        | 0        | 0        | 0.002433 | 0.000592 | 0        | 0        | 0        | 0 |
| 0.000526 | 0        | 0        | 0        | 0.001118 | 9.86E-05 | 0        | 6.57E-05 | 0 |
| 0        | 0        | 0        | 0        | 0        | 0        | 0        | 0.002334 | 0 |
| 0        | 0        | 0        | 0        | 0        | 0        | 0        | 0.000164 | 0 |

|          |          |          |          |          |   |          |          |          |
|----------|----------|----------|----------|----------|---|----------|----------|----------|
| 0        | 0        | 0        | 0        | 0        | 0 | 0        | 0        | 0        |
| 0.00023  | 0.000197 | 0        | 0.000592 | 0.000723 | 0 | 0        | 0        | 0        |
| 0        | 0        | 0        | 0.00069  | 0        | 0 | 0        | 0.000263 | 0        |
| 0        | 6.57E-05 | 0        | 0        | 0        | 0 | 0        | 0.000263 | 0        |
| 0        | 0        | 0        | 0        | 0        | 0 | 0        | 6.57E-05 | 0        |
| 0        | 0        | 0        | 0        | 0        | 0 | 0        | 0        | 0        |
| 0        | 0        | 0        | 0.000394 | 0        | 0 | 0        | 3.29E-05 | 0        |
| 0        | 0        | 0        | 0        | 0        | 0 | 0        | 0        | 0        |
| 0        | 0        | 0        | 0        | 0        | 0 | 0        | 0        | 0        |
| 0        | 0        | 0        | 0        | 0        | 0 | 0        | 0        | 0        |
| 0        | 0        | 0        | 0        | 0        | 0 | 0        | 0        | 0        |
| 0        | 0        | 0        | 0        | 0        | 0 | 0        | 0        | 0        |
| 0        | 0        | 0        | 0        | 0        | 0 | 0        | 0        | 0        |
| 0        | 0        | 0        | 0        | 0        | 0 | 0        | 0        | 0        |
| 0        | 0        | 0        | 0        | 0        | 0 | 0        | 3.29E-05 | 0        |
| 0        | 3.29E-05 | 0        | 0        | 3.29E-05 | 0 | 0        | 0        | 0        |
| 0        | 0        | 0        | 0        | 0        | 0 | 0        | 0        | 0        |
| 0.001709 | 3.29E-05 | 0        | 0.002893 | 0.00812  | 0 | 0        | 0.000197 | 0        |
| 0.000526 | 0        | 0        | 0.001249 | 0.004274 | 0 | 0        | 9.86E-05 | 0        |
| 6.57E-05 | 0        | 0        | 0.000493 | 0.000953 | 0 | 0        | 0.000559 | 0        |
| 3.29E-05 | 0        | 0        | 0.000888 | 0.000953 | 0 | 3.29E-05 | 3.29E-05 | 0        |
| 0.000131 | 0        | 0        | 0.000362 | 0.001315 | 0 | 0        | 3.29E-05 | 0        |
| 0.001545 | 0        | 0        | 0.000131 | 0.001414 | 0 | 0        | 0.000131 | 0        |
| 0.000296 | 0        | 0        | 3.29E-05 | 0.001841 | 0 | 3.29E-05 | 0        | 0        |
| 0.000427 | 0.000526 | 0        | 0.000362 | 0.001742 | 0 | 0        | 0.000394 | 0        |
| 0        | 0        | 0        | 0        | 0.00023  | 0 | 0        | 0        | 0        |
| 6.57E-05 | 0        | 0        | 0.000296 | 3.29E-05 | 0 | 0        | 0.00069  | 0        |
| 0.000657 | 0        | 0        | 0.005063 | 0.002926 | 0 | 0        | 3.29E-05 | 3.29E-05 |
| 0.00023  | 0        | 0        | 0.000263 | 0.000493 | 0 | 0        | 6.57E-05 | 0        |
| 0.000427 | 0        | 0        | 0.001315 | 0.001085 | 0 | 0        | 0        | 0        |
| 0.000592 | 0        | 0        | 0.001841 | 0.001019 | 0 | 6.57E-05 | 0        | 6.57E-05 |
| 0.000131 | 0        | 0        | 0.000296 | 0.000427 | 0 | 0        | 6.57E-05 | 0        |
| 0.003255 | 0        | 0        | 0.001644 | 0.000822 | 0 | 0        | 0        | 0        |
| 0.000263 | 0        | 0        | 0        | 6.57E-05 | 0 | 0        | 0        | 0        |
| 0.001019 | 0        | 0        | 0.001052 | 0.000953 | 0 | 0        | 0        | 0        |
| 0.000197 | 0        | 0        | 6.57E-05 | 0.001545 | 0 | 0        | 0        | 0        |
| 0.000559 | 0        | 0        | 0.002104 | 0.001644 | 0 | 0        | 0        | 9.86E-05 |
| 0        | 0        | 0        | 0.00069  | 0.000329 | 0 | 9.86E-05 | 0.004471 | 0        |
| 0        | 0        | 0        | 3.29E-05 | 0        | 0 | 0        | 0.000855 | 0        |
| 3.29E-05 | 0        | 0        | 0.001972 | 3.29E-05 | 0 | 0        | 0        | 0        |
| 0        | 0        | 0        | 0.001052 | 0        | 0 | 0.000131 | 0.001019 | 0        |
| 3.29E-05 | 0        | 0        | 0.000953 | 0.000197 | 0 | 0.000822 | 3.29E-05 | 0        |
| 0.000131 | 0        | 0        | 0.000263 | 3.29E-05 | 0 | 0        | 0.000888 | 0        |
| 0        | 0.000263 | 0        | 0        | 3.29E-05 | 0 | 6.57E-05 | 0.002005 | 0        |
| 0        | 0        | 0        | 0        | 3.29E-05 | 0 | 0        | 0.001315 | 0        |
| 0        | 0        | 0        | 0.000197 | 0.000657 | 0 | 0        | 3.29E-05 | 0        |
| 0        | 0.000888 | 9.86E-05 | 0        | 3.29E-05 | 0 | 0        | 0.001446 | 0        |

|          |          |          |          |          |   |          |          |          |
|----------|----------|----------|----------|----------|---|----------|----------|----------|
| 0        | 0        | 0        | 0        | 0        | 0 | 0        | 0        | 0        |
| 0        | 0        | 0        | 0        | 9.86E-05 | 0 | 0        | 0        | 0        |
| 0        | 0        | 0        | 0        | 0        | 0 | 0        | 0        | 0        |
| 0        | 0        | 0        | 0        | 0.000427 | 0 | 9.86E-05 | 0.000164 | 0        |
| 0        | 0        | 0        | 0        | 3.29E-05 | 0 | 3.29E-05 | 0        | 0        |
| 0.000427 | 0        | 0        | 0.002104 | 0.001151 | 0 | 3.29E-05 | 0        | 0        |
| 0.000526 | 0        | 0        | 0.000789 | 0        | 0 | 0        | 3.29E-05 | 3.29E-05 |
| 3.29E-05 | 0        | 0        | 0.002564 | 0        | 0 | 0        | 9.86E-05 | 0        |
| 0.000329 | 0        | 0        | 0.00092  | 3.29E-05 | 0 | 0        | 0        | 0.000164 |
| 9.86E-05 | 0        | 0        | 0.001315 | 0        | 0 | 0        | 0        | 0        |
| 6.57E-05 | 0        | 0        | 0.001742 | 0        | 0 | 0        | 0        | 0        |
| 0        | 0        | 0        | 0.006213 | 0        | 0 | 0        | 0        | 0        |
| 0.001677 | 0        | 0        | 0.00046  | 0.002203 | 0 | 0.000263 | 0        | 3.29E-05 |
| 0.000888 | 0        | 0        | 0.000953 | 0.000855 | 0 | 0        | 0.000131 | 0.000986 |
| 0.000164 | 0        | 0        | 0.002498 | 0.001709 | 0 | 0        | 0        | 0        |
| 0.000657 | 0        | 0        | 0        | 0.001381 | 0 | 0        | 0.000164 | 0        |
| 0.000394 | 0        | 0        | 9.86E-05 | 6.57E-05 | 0 | 0        | 0        | 0        |
| 0.000164 | 0        | 0        | 0.006805 | 0.000822 | 0 | 0        | 0        | 6.57E-05 |
| 0        | 0        | 0        | 0.005326 | 0.000723 | 0 | 0        | 0        | 3.29E-05 |
| 3.29E-05 | 0        | 0        | 0.004931 | 0.000592 | 0 | 0        | 3.29E-05 | 0        |
| 9.86E-05 | 0        | 0        | 0.000953 | 0.000625 | 0 | 0        | 0        | 0        |
| 0        | 0        | 0        | 0        | 6.57E-05 | 0 | 0.000164 | 0.00046  | 0        |
| 0        | 0        | 0        | 0        | 0        | 0 | 0        | 6.57E-05 | 0        |
| 0        | 0        | 0        | 0        | 0        | 0 | 0        | 3.29E-05 | 0        |
| 0.001775 | 0        | 0        | 0.000493 | 0.004076 | 0 | 0        | 0.000197 | 0        |
| 0.000394 | 0        | 0        | 9.86E-05 | 0.000493 | 0 | 9.86E-05 | 0        | 0        |
| 0        | 0        | 0        | 0        | 0.002137 | 0 | 0        | 0        | 0        |
| 0.000362 | 0        | 0        | 0        | 0.000756 | 0 | 0        | 0.000164 | 0        |
| 6.57E-05 | 0        | 0        | 0        | 0.000263 | 0 | 0        | 3.29E-05 | 0        |
| 0.000131 | 0        | 0        | 0        | 0.001019 | 0 | 0.000493 | 0.001381 | 0        |
| 0        | 0        | 0        | 0.000329 | 3.29E-05 | 0 | 0        | 0        | 0        |
| 0        | 0        | 0        | 0.002235 | 0        | 0 | 0        | 0        | 6.57E-05 |
| 0        | 0        | 0        | 0.002005 | 0.00046  | 0 | 0        | 0        | 3.29E-05 |
| 0        | 0        | 0        | 6.57E-05 | 0        | 0 | 0        | 0.000164 | 0        |
| 0.003945 | 0        | 0        | 0        | 0        | 0 | 0        | 0        | 0        |
| 0        | 0        | 0        | 6.57E-05 | 0        | 0 | 0        | 0        | 0        |
| 0        | 0.002104 | 6.57E-05 | 6.57E-05 | 9.86E-05 | 0 | 0        | 0.001907 | 0        |
| 0        | 0        | 0        | 0        | 3.29E-05 | 0 | 0        | 0.000131 | 0        |
| 0        | 0        | 0        | 0        | 0        | 0 | 0        | 0.00023  | 0        |
| 0        | 0        | 0        | 0        | 0        | 0 | 0        | 0.001545 | 0        |
| 0        | 0        | 0        | 0.00046  | 0.001118 | 0 | 0        | 0        | 0        |
| 0        | 0        | 0        | 0        | 0        | 0 | 0        | 0        | 0        |
| 0        | 0        | 0        | 0        | 0        | 0 | 0        | 0        | 0        |
| 0        | 0        | 0        | 0        | 0        | 0 | 0        | 0        | 0        |
| 0        | 0        | 0        | 0        | 0        | 0 | 0        | 0        | 0        |
| 0.002038 | 3.29E-05 | 0        | 0        | 0.003419 | 0 | 0        | 0.000329 | 0        |
| 0        | 0        | 0        | 3.29E-05 | 0.000427 | 0 | 0        | 0        | 0        |

|          |          |   |          |          |   |          |          |          |
|----------|----------|---|----------|----------|---|----------|----------|----------|
| 0        | 0        | 0 | 0.004307 | 0.002959 | 0 | 0        | 0        | 0        |
| 0        | 0        | 0 | 0        | 0.000756 | 0 | 0        | 0        | 0        |
| 0        | 0        | 0 | 0.000197 | 0.002531 | 0 | 3.29E-05 | 9.86E-05 | 0        |
| 0        | 0        | 0 | 0        | 0.001775 | 0 | 0        | 0.000197 | 0        |
| 0        | 0        | 0 | 0        | 0        | 0 | 0        | 0.00023  | 0        |
| 0        | 0        | 0 | 0        | 0        | 0 | 0        | 0        | 0        |
| 0        | 0        | 0 | 0.000164 | 6.57E-05 | 0 | 0        | 0.001414 | 0        |
| 0        | 0.000493 | 0 | 0        | 0        | 0 | 0        | 0.001907 | 0        |
| 0.000526 | 0        | 0 | 0.000329 | 0        | 0 | 0        | 0        | 0        |
| 0        | 0        | 0 | 0.000888 | 0.003024 | 0 | 0        | 0.000394 | 0.000197 |
| 0        | 0        | 0 | 0        | 0        | 0 | 0        | 0        | 0        |
| 0        | 0        | 0 | 9.86E-05 | 0        | 0 | 0        | 0        | 0        |
| 0        | 3.29E-05 | 0 | 3.29E-05 | 0        | 0 | 0        | 0        | 0        |
| 0        | 0        | 0 | 0.000164 | 0        | 0 | 0        | 0        | 0        |
| 0        | 0        | 0 | 3.29E-05 | 3.29E-05 | 0 | 0        | 0        | 0        |
| 0        | 0        | 0 | 0        | 0        | 0 | 0        | 0        | 0        |
| 0        | 0        | 0 | 0        | 0        | 0 | 0        | 0.000296 | 0        |
| 0        | 0.000164 | 0 | 0        | 0        | 0 | 0        | 0        | 0        |
| 0        | 0        | 0 | 0        | 0        | 0 | 0        | 9.86E-05 | 0        |
| 0        | 0        | 0 | 0        | 0        | 0 | 0        | 0        | 0        |
| 0        | 0        | 0 | 0        | 0        | 0 | 0        | 0        | 0        |
| 0        | 0        | 0 | 0        | 0        | 0 | 0        | 0        | 0        |
| 0        | 0        | 0 | 0        | 0        | 0 | 0        | 0.000164 | 0        |
| 0        | 0        | 0 | 0        | 0        | 0 | 0        | 0        | 0        |
| 0.000592 | 0        | 0 | 0.000592 | 0.001578 | 0 | 9.86E-05 | 0        | 0        |
| 0.00023  | 0        | 0 | 0.000657 | 0.001019 | 0 | 3.29E-05 | 9.86E-05 | 0        |
| 0        | 0        | 0 | 3.29E-05 | 0.000131 | 0 | 0        | 0        | 0        |
| 0        | 0        | 0 | 9.86E-05 | 0.001677 | 0 | 0        | 0.000131 | 0        |
| 0        | 0        | 0 | 9.86E-05 | 0.000526 | 0 | 0        | 0.000197 | 0        |
| 0        | 0        | 0 | 0.000164 | 0.002301 | 0 | 0        | 0        | 0        |
| 0        | 6.57E-05 | 0 | 0        | 0.00069  | 0 | 0        | 0        | 0        |
| 0        | 0        | 0 | 0        | 0.001545 | 0 | 0        | 0        | 0        |
| 0.000625 | 0        | 0 | 6.57E-05 | 0.000953 | 0 | 0        | 9.86E-05 | 3.29E-05 |
| 0.001907 | 0        | 0 | 6.57E-05 | 0.001085 | 0 | 0        | 0        | 0        |
| 9.86E-05 | 0        | 0 | 0.002005 | 0.000296 | 0 | 3.29E-05 | 9.86E-05 | 0        |
| 0        | 0        | 0 | 0.000986 | 9.86E-05 | 0 | 0        | 0        | 0        |
| 0.001972 | 0        | 0 | 0.000131 | 9.86E-05 | 0 | 3.29E-05 | 0        | 0        |
| 0.00046  | 0        | 0 | 0.000657 | 0.000526 | 0 | 0        | 0        | 0        |
| 0        | 0        | 0 | 0        | 0        | 0 | 0        | 0        | 0        |
| 0.000164 | 0        | 0 | 0        | 3.29E-05 | 0 | 0        | 0.000362 | 0        |
| 0.019593 | 0        | 0 | 0        | 0.000625 | 0 | 0        | 0        | 0        |
| 0.004011 | 0        | 0 | 0.001348 | 0.001216 | 0 | 0.000427 | 9.86E-05 | 0.000329 |
| 9.86E-05 | 0        | 0 | 0.000427 | 0.000657 | 0 | 0        | 0        | 0        |
| 0.000855 | 0        | 0 | 0.001446 | 0.000888 | 0 | 6.57E-05 | 0        | 3.29E-05 |
| 0.001972 | 0        | 0 | 0.002696 | 0.00263  | 0 | 0.000625 | 0.000131 | 0.000263 |
| 0.000131 | 0        | 0 | 0.001118 | 0.00092  | 0 | 3.29E-05 | 0        | 0        |
| 6.57E-05 | 0        | 0 | 0.000986 | 0.002104 | 0 | 6.57E-05 | 0        | 0        |



|          |          |          |          |          |   |          |          |          |
|----------|----------|----------|----------|----------|---|----------|----------|----------|
| 0        | 0        | 0        | 0.000394 | 0.001644 | 0 | 0        | 0        | 0        |
| 0        | 0        | 0.000131 | 0.000592 | 0.002498 | 0 | 0        | 0.00023  | 0        |
| 0        | 0        | 0        | 0.000888 | 0.002268 | 0 | 0        | 0        | 9.86E-05 |
| 0.000197 | 0        | 0        | 0.00263  | 0.000657 | 0 | 0        | 0.000164 | 0        |
| 0        | 0        | 0        | 0.002203 | 0.000657 | 0 | 3.29E-05 | 0.000822 | 0        |
| 0        | 0        | 0        | 0.00069  | 0.000526 | 0 | 0        | 0.000822 | 0        |
| 0.000263 | 0        | 0        | 0.001709 | 0.002433 | 0 | 0        | 0.000362 | 3.29E-05 |
| 0.000197 | 0        | 0        | 0.003057 | 0.001512 | 0 | 6.57E-05 | 0        | 3.29E-05 |
| 0        | 0        | 0        | 0.013774 | 0.003287 | 0 | 0        | 0        | 0        |
| 6.57E-05 | 0        | 0        | 0.001907 | 0.001611 | 0 | 3.29E-05 | 3.29E-05 | 0.000263 |
| 9.86E-05 | 0        | 0        | 0.001545 | 0.000493 | 0 | 0        | 0        | 6.57E-05 |
| 0        | 0        | 0        | 0.001578 | 0.001414 | 0 | 0.000131 | 0        | 6.57E-05 |
| 0        | 0        | 0        | 0.002268 | 0.001216 | 0 | 0.001118 | 0        | 0.000329 |
| 0.001216 | 0        | 0        | 0        | 0.002926 | 0 | 0        | 3.29E-05 | 0        |
| 0.000197 | 0        | 0        | 6.57E-05 | 0.00046  | 0 | 0        | 6.57E-05 | 0        |
| 3.29E-05 | 0        | 0        | 0.000263 | 0.00023  | 0 | 0        | 0        | 3.29E-05 |
| 6.57E-05 | 0        | 0        | 6.57E-05 | 0.000789 | 0 | 0        | 0        | 0        |
| 9.86E-05 | 0        | 0        | 0.00046  | 0.000427 | 0 | 0        | 0        | 0        |
| 0.000164 | 0        | 0        | 0.000131 | 0.000657 | 0 | 0        | 0        | 0        |
| 6.57E-05 | 0        | 0        | 0.000559 | 0.00046  | 0 | 0        | 0        | 3.29E-05 |
| 6.57E-05 | 0        | 0        | 0.00069  | 0.000131 | 0 | 0        | 0        | 0        |
| 6.57E-05 | 0        | 0        | 0.00069  | 0.000362 | 0 | 0        | 0        | 0        |
| 6.57E-05 | 0        | 0        | 0.000493 | 0.000559 | 0 | 0        | 0        | 0        |
| 3.29E-05 | 0        | 0        | 0.000855 | 0.000526 | 0 | 0        | 0        | 0        |
| 0.000362 | 0        | 0        | 0.000789 | 0.00069  | 0 | 0        | 0        | 6.57E-05 |
| 0        | 0        | 0        | 0        | 0        | 0 | 0        | 0.000131 | 0        |
| 3.29E-05 | 0        | 0        | 0.000164 | 3.29E-05 | 0 | 0        | 9.86E-05 | 0        |
| 0        | 0        | 0        | 0        | 0        | 0 | 0        | 0.000164 | 0        |
| 0        | 0        | 0        | 3.29E-05 | 0        | 0 | 0        | 0        | 0        |
| 0        | 0        | 0        | 0        | 0        | 0 | 0        | 0        | 0        |
| 0        | 0        | 0        | 0        | 0        | 0 | 0        | 0.000263 | 0        |
| 0        | 0        | 0        | 0        | 0        | 0 | 0        | 3.29E-05 | 0        |
| 0        | 0        | 0        | 0        | 0        | 0 | 0        | 3.29E-05 | 0        |
| 0        | 0        | 0        | 0        | 0        | 0 | 0        | 0.000822 | 0        |
| 0        | 0        | 0        | 0        | 0        | 0 | 0        | 6.57E-05 | 0        |
| 0.00046  | 0        | 0        | 0.001446 | 0.001841 | 0 | 6.57E-05 | 0.000164 | 0        |
| 0.000822 | 0        | 0        | 0.001085 | 0.001644 | 0 | 0.000263 | 0        | 0        |
| 0.000131 | 0        | 0        | 0.001019 | 0.000427 | 0 | 0        | 0        | 0        |
| 0.001611 | 3.29E-05 | 0        | 0.000855 | 0.002334 | 0 | 0.000592 | 0.00023  | 0        |
| 0.000131 | 0        | 0        | 0.001677 | 0        | 0 | 0        | 3.29E-05 | 0        |
| 0.000526 | 0        | 0        | 0.000296 | 0.00023  | 0 | 0.000164 | 3.29E-05 | 0        |
| 0.000329 | 0        | 0        | 0.001414 | 0.000164 | 0 | 0        | 0        | 0        |
| 0.001414 | 0        | 0        | 0.000625 | 0.001085 | 0 | 0        | 0        | 0        |
| 0        | 0        | 0        | 0.006049 | 0.001118 | 0 | 0        | 0        | 0        |
| 3.29E-05 | 0        | 0        | 0.000427 | 0.000329 | 0 | 0        | 0        | 0        |
| 0        | 0        | 0        | 0.000986 | 9.86E-05 | 0 | 0        | 0        | 0        |
| 0        | 0        | 0        | 0.000362 | 0.000559 | 0 | 0        | 0        | 0        |

|          |   |   |          |          |          |          |          |          |
|----------|---|---|----------|----------|----------|----------|----------|----------|
| 0        | 0 | 0 | 0.000953 | 0.000625 | 0        | 0        | 0        | 0.00092  |
| 0        | 0 | 0 | 0.001907 | 0.002367 | 0        | 0        | 3.29E-05 | 0        |
| 0        | 0 | 0 | 0.001644 | 0.005391 | 0        | 0        | 0        | 0        |
| 0        | 0 | 0 | 0.000657 | 0.000592 | 0        | 0        | 0.000131 | 0        |
| 0        | 0 | 0 | 0.000855 | 0.00263  | 0        | 0        | 0        | 0        |
| 0.000756 | 0 | 0 | 6.57E-05 | 0.000164 | 0        | 0        | 0        | 0.000131 |
| 0.00046  | 0 | 0 | 3.29E-05 | 0.000526 | 0        | 3.29E-05 | 0.000197 | 0.000131 |
| 0        | 0 | 0 | 0.002729 | 0.000362 | 0        | 0.000263 | 0        | 0        |
| 0        | 0 | 0 | 6.57E-05 | 6.57E-05 | 0        | 0        | 6.57E-05 | 0        |
| 0        | 0 | 0 | 0.000131 | 9.86E-05 | 0        | 0        | 0        | 0        |
| 0.001019 | 0 | 0 | 0.003945 | 0.002926 | 0        | 0        | 0        | 0        |
| 6.57E-05 | 0 | 0 | 0        | 0.000197 | 0        | 0        | 0        | 3.29E-05 |
| 0.000164 | 0 | 0 | 3.29E-05 | 0.001479 | 0        | 0        | 0.000296 | 0        |
| 0.000131 | 0 | 0 | 0        | 0.000164 | 0.000131 | 0        | 0.001019 | 0        |
| 0.000197 | 0 | 0 | 0        | 0.000789 | 0        | 0        | 0        | 0        |
| 0.000329 | 0 | 0 | 0        | 0.001348 | 0        | 0        | 0        | 0        |
| 0.000197 | 0 | 0 | 0        | 0.000263 | 0        | 0        | 0        | 0        |
| 0.001578 | 0 | 0 | 0.000131 | 0.001019 | 0        | 0        | 0        | 6.57E-05 |
| 0.001545 | 0 | 0 | 6.57E-05 | 0.005326 | 0        | 0        | 0        | 0.000131 |
| 0.000329 | 0 | 0 | 6.57E-05 | 0.003813 | 0        | 0        | 0.000131 | 0        |
| 0.002268 | 0 | 0 | 0.000986 | 0.00263  | 0        | 0        | 0        | 6.57E-05 |
| 0.000756 | 0 | 0 | 3.29E-05 | 0.011736 | 0        | 0        | 6.57E-05 | 0        |
| 0        | 0 | 0 | 3.29E-05 | 9.86E-05 | 0        | 0        | 0.000131 | 0        |

| k_Bacteri |
|-----------|-----------|-----------|-----------|-----------|-----------|-----------|-----------|-----------|
| 0         | 9.86E-05  | 0         | 0         | 0         | 0.000296  | 0         | 0         | 0         |
| 0         | 0.000789  | 0         | 0         | 0         | 0.000427  | 0         | 0         | 0         |
| 0         | 0         | 0         | 0         | 0         | 3.29E-05  | 0         | 0         | 0         |
| 0         | 0         | 0         | 0         | 0         | 0         | 0         | 0         | 0         |
| 0         | 0         | 0         | 0         | 0         | 0         | 0         | 0         | 0         |
| 0         | 0         | 0         | 0         | 0         | 9.86E-05  | 0         | 0         | 0         |
| 0         | 0         | 0         | 0         | 0.000855  | 3.29E-05  | 0         | 0         | 0         |
| 0         | 0         | 0         | 0         | 0         | 0         | 0         | 0         | 0         |
| 0         | 0.000526  | 0         | 0         | 0         | 0.001315  | 0         | 0         | 0         |
| 0         | 9.86E-05  | 0         | 0         | 0         | 0.000131  | 0         | 0         | 0         |
| 0         | 6.57E-05  | 0         | 0         | 0         | 0.000592  | 0         | 0         | 0         |
| 0         | 9.86E-05  | 0         | 0         | 0         | 3.29E-05  | 0         | 0         | 0         |
| 0         | 0.023143  | 0         | 9.86E-05  | 0         | 0.008942  | 0         | 0         | 0         |
| 0         | 0.003255  | 0         | 0         | 0         | 0.000789  | 0         | 0         | 0         |
| 0         | 0.001775  | 0         | 0         | 0         | 0.000296  | 0         | 0         | 0         |
| 0         | 0         | 0         | 0         | 0         | 0.001446  | 0         | 0         | 0         |
| 0         | 0         | 0         | 0         | 0         | 0.019494  | 0         | 0         | 0         |
| 0         | 0         | 0         | 0         | 0         | 0.000164  | 0         | 0         | 0         |
| 0         | 0         | 0         | 0         | 0         | 3.29E-05  | 0         | 0         | 0         |
| 0         | 9.86E-05  | 0         | 0         | 0         | 0.000197  | 0         | 0         | 0         |
| 0         | 0.001052  | 0         | 0         | 0         | 0.00092   | 0         | 0         | 0         |
| 0         | 0.000329  | 0         | 0         | 0         | 0.000592  | 0         | 0         | 0         |
| 0         | 0.000657  | 0         | 0         | 0         | 0.000197  | 0         | 0         | 0         |
| 0         | 0         | 0         | 0         | 0         | 0.000164  | 0         | 0         | 0         |
| 0         | 0         | 0         | 0         | 0         | 0.000131  | 0         | 0         | 0         |
| 0         | 0         | 0         | 0         | 0         | 6.57E-05  | 0         | 0         | 0         |
| 0         | 0         | 0         | 0         | 0         | 0.000197  | 0         | 0         | 0         |
| 0         | 3.29E-05  | 0         | 0         | 0         | 3.29E-05  | 0         | 0         | 0         |
| 0         | 0.000296  | 0         | 0         | 0         | 0         | 0         | 0         | 0         |
| 0         | 0         | 0         | 0         | 0         | 3.29E-05  | 0         | 0         | 0         |
| 0         | 3.29E-05  | 3.29E-05  | 0         | 0         | 0         | 0         | 0         | 0         |
| 0         | 0         | 0         | 0         | 0         | 0         | 0         | 0         | 0         |
| 0         | 0.000723  | 0         | 0         | 0.00023   | 0.000789  | 0         | 0         | 0         |
| 0         | 0         | 0.00641   | 0         | 0         | 3.29E-05  | 0         | 0         | 0         |
| 0         | 6.57E-05  | 0         | 0         | 0         | 0         | 0         | 0         | 0         |
| 0         | 0         | 0         | 0         | 0         | 3.29E-05  | 0         | 0         | 0         |
| 0         | 9.86E-05  | 0.000789  | 0.001709  | 0         | 0         | 0         | 0         | 0         |
| 0         | 0         | 0         | 6.57E-05  | 0         | 9.86E-05  | 0         | 0         | 0         |
| 0         | 3.29E-05  | 0.004537  | 0.000888  | 0         | 0         | 0         | 0         | 0         |
| 0         | 0.00023   | 0.000855  | 0.000427  | 0         | 6.57E-05  | 0         | 0         | 0         |
| 0         | 6.57E-05  | 0.002597  | 0.003419  | 0         | 0         | 0         | 0         | 0         |
| 0         | 0.000526  | 0         | 3.29E-05  | 0         | 0.000164  | 0         | 0         | 0         |
| 0         | 0.000164  | 3.29E-05  | 0.000822  | 0         | 0.000822  | 0         | 0         | 0         |
| 0         | 3.29E-05  | 0         | 0         | 0         | 0         | 0         | 0         | 0         |

|   |          |          |          |   |          |   |   |          |
|---|----------|----------|----------|---|----------|---|---|----------|
| 0 | 0        | 0        | 0.000394 | 0 | 3.29E-05 | 0 | 0 | 0        |
| 0 | 6.57E-05 | 0        | 0        | 0 | 0.000131 | 0 | 0 | 0        |
| 0 | 0        | 0        | 0        | 0 | 3.29E-05 | 0 | 0 | 0        |
| 0 | 3.29E-05 | 0        | 0        | 0 | 0.000296 | 0 | 0 | 0        |
| 0 | 0        | 0        | 0        | 0 | 3.29E-05 | 0 | 0 | 0        |
| 0 | 0        | 0        | 0        | 0 | 0        | 0 | 0 | 0        |
| 0 | 0        | 0        | 0        | 0 | 9.86E-05 | 0 | 0 | 0        |
| 0 | 3.29E-05 | 0        | 0        | 0 | 0        | 0 | 0 | 0        |
| 0 | 0        | 0        | 0        | 0 | 3.29E-05 | 0 | 0 | 0        |
| 0 | 0        | 0        | 0        | 0 | 0        | 0 | 0 | 0        |
| 0 | 0.00503  | 0        | 0        | 0 | 0.003419 | 0 | 0 | 0        |
| 0 | 0        | 0        | 0        | 0 | 0        | 0 | 0 | 0        |
| 0 | 0.00046  | 0        | 0        | 0 | 0.000329 | 0 | 0 | 0        |
| 0 | 0.00023  | 0        | 0        | 0 | 0        | 0 | 0 | 0        |
| 0 | 0.000131 | 0.00046  | 0.000394 | 0 | 0        | 0 | 0 | 0        |
| 0 | 0.001414 | 0.001348 | 0        | 0 | 0.000131 | 0 | 0 | 0        |
| 0 | 0        | 3.29E-05 | 0        | 0 | 0        | 0 | 0 | 0        |
| 0 | 0        | 0        | 0        | 0 | 0        | 0 | 0 | 0        |
| 0 | 0        | 0        | 0        | 0 | 3.29E-05 | 0 | 0 | 0        |
| 0 | 0.000362 | 0        | 0        | 0 | 0        | 0 | 0 | 0        |
| 0 | 0.000723 | 0        | 0        | 0 | 0.00069  | 0 | 0 | 0.000197 |
| 0 | 0        | 0        | 0        | 0 | 0.000164 | 0 | 0 | 0        |
| 0 | 3.29E-05 | 0        | 0        | 0 | 3.29E-05 | 0 | 0 | 0        |
| 0 | 0        | 0        | 0        | 0 | 0        | 0 | 0 | 0        |
| 0 | 0.00046  | 0        | 0        | 0 | 0.000263 | 0 | 0 | 0        |
| 0 | 0        | 0        | 0        | 0 | 0        | 0 | 0 | 0        |
| 0 | 0        | 0        | 0        | 0 | 0.012722 | 0 | 0 | 0        |
| 0 | 0        | 0        | 0        | 0 | 0.004011 | 0 | 0 | 0        |
| 0 | 0.000362 | 3.29E-05 | 0        | 0 | 0        | 0 | 0 | 0        |
| 0 | 0        | 0        | 0        | 0 | 0        | 0 | 0 | 0        |
| 0 | 0        | 0        | 0        | 0 | 9.86E-05 | 0 | 0 | 0        |
| 0 | 0.000197 | 0        | 0        | 0 | 0.000164 | 0 | 0 | 0        |
| 0 | 0.00069  | 0        | 0        | 0 | 0.000526 | 0 | 0 | 0        |
| 0 | 0        | 0        | 0        | 0 | 0.000197 | 0 | 0 | 0        |
| 0 | 0        | 0        | 0        | 0 | 3.29E-05 | 0 | 0 | 0        |
| 0 | 3.29E-05 | 0        | 0        | 0 | 9.86E-05 | 0 | 0 | 0        |
| 0 | 0        | 0.000197 | 0        | 0 | 0        | 0 | 0 | 0        |
| 0 | 0.023406 | 0        | 0        | 0 | 0.011868 | 0 | 0 | 0        |
| 0 | 0        | 6.57E-05 | 0.000493 | 0 | 0.001972 | 0 | 0 | 0        |
| 0 | 0        | 0.000723 | 0        | 0 | 0.001677 | 0 | 0 | 0        |
| 0 | 0.000789 | 0        | 0        | 0 | 0.000394 | 0 | 0 | 0        |
| 0 | 9.86E-05 | 0        | 0.000131 | 0 | 0.000131 | 0 | 0 | 0        |
| 0 | 0.000131 | 0        | 0        | 0 | 0        | 0 | 0 | 0        |
| 0 | 0.012624 | 0        | 0        | 0 | 0.009238 | 0 | 0 | 0        |
| 0 | 0        | 0        | 0        | 0 | 3.29E-05 | 0 | 0 | 0        |
| 0 | 3.29E-05 | 0        | 0        | 0 | 0.000362 | 0 | 0 | 0        |
| 0 | 0        | 0        | 0        | 0 | 9.86E-05 | 0 | 0 | 0        |

|          |          |          |          |          |          |   |   |   |
|----------|----------|----------|----------|----------|----------|---|---|---|
| 0        | 0        | 0        | 0        | 0        | 3.29E-05 | 0 | 0 | 0 |
| 0        | 0        | 0        | 0        | 0        | 0.000197 | 0 | 0 | 0 |
| 0        | 0        | 0        | 0        | 0        | 6.57E-05 | 0 | 0 | 0 |
| 0        | 0.000197 | 0.00069  | 0.000164 | 0        | 0.000197 | 0 | 0 | 0 |
| 0        | 3.29E-05 | 0        | 0        | 0        | 9.86E-05 | 0 | 0 | 0 |
| 0        | 0        | 0        | 0        | 0        | 0        | 0 | 0 | 0 |
| 0        | 0.000164 | 0        | 0        | 0        | 0        | 0 | 0 | 0 |
| 0        | 0        | 0        | 0        | 0        | 0        | 0 | 0 | 0 |
| 0        | 0        | 0        | 0        | 0        | 3.29E-05 | 0 | 0 | 0 |
| 0        | 0        | 0        | 0        | 0        | 3.29E-05 | 0 | 0 | 0 |
| 0        | 0.000197 | 0        | 0        | 0        | 3.29E-05 | 0 | 0 | 0 |
| 0        | 0        | 0        | 0        | 0        | 0.000131 | 0 | 0 | 0 |
| 0        | 0.004214 | 0        | 0        | 0        | 0.003582 | 0 | 0 | 0 |
| 0        | 0.000657 | 0        | 3.29E-05 | 0        | 0.001677 | 0 | 0 | 0 |
| 0        | 0.000822 | 0        | 0        | 0        | 3.29E-05 | 0 | 0 | 0 |
| 0        | 0.000953 | 0        | 0        | 0        | 6.57E-05 | 0 | 0 | 0 |
| 0.000296 | 6.57E-05 | 0        | 0        | 0        | 0.004668 | 0 | 0 | 0 |
| 0        | 0.000197 | 0        | 0        | 0        | 0.000197 | 0 | 0 | 0 |
| 0        | 0        | 0        | 0        | 0        | 0        | 0 | 0 | 0 |
| 0        | 9.86E-05 | 0        | 0        | 0        | 0.000329 | 0 | 0 | 0 |
| 0        | 0.002761 | 0        | 0        | 0        | 9.86E-05 | 0 | 0 | 0 |
| 0        | 0.000427 | 0        | 0        | 0        | 0        | 0 | 0 | 0 |
| 0        | 0        | 0        | 0        | 0        | 0        | 0 | 0 | 0 |
| 0        | 3.29E-05 | 3.29E-05 | 0        | 0        | 0        | 0 | 0 | 0 |
| 0        | 3.29E-05 | 0        | 0        | 0        | 0        | 0 | 0 | 0 |
| 0        | 3.29E-05 | 0        | 0        | 0        | 6.57E-05 | 0 | 0 | 0 |
| 0        | 0        | 0        | 0        | 0        | 0        | 0 | 0 | 0 |
| 0        | 0        | 0        | 0        | 0        | 0.000394 | 0 | 0 | 0 |
| 0        | 0        | 0        | 0        | 0        | 0        | 0 | 0 | 0 |
| 0        | 0.000131 | 0        | 0        | 0        | 0        | 0 | 0 | 0 |
| 0        | 0        | 0        | 0        | 0        | 0        | 0 | 0 | 0 |
| 0        | 0        | 0        | 0        | 0        | 9.86E-05 | 0 | 0 | 0 |
| 0        | 0.000263 | 0        | 0        | 0        | 0.000493 | 0 | 0 | 0 |
| 0        | 0.00023  | 0        | 0        | 0        | 9.86E-05 | 0 | 0 | 0 |
| 0        | 0        | 0        | 0        | 0        | 3.29E-05 | 0 | 0 | 0 |
| 0        | 0        | 0        | 0        | 0        | 6.57E-05 | 0 | 0 | 0 |
| 0        | 0.000197 | 0        | 0        | 0        | 3.29E-05 | 0 | 0 | 0 |
| 0        | 0        | 0        | 0.00092  | 0        | 0        | 0 | 0 | 0 |
| 0        | 0        | 0        | 0.000296 | 0        | 9.86E-05 | 0 | 0 | 0 |
| 0        | 0        | 0        | 0.000789 | 0        | 6.57E-05 | 0 | 0 | 0 |
| 0        | 0.000131 | 0.002268 | 0.000362 | 0        | 3.29E-05 | 0 | 0 | 0 |
| 0        | 0.004076 | 0.000559 | 0.001019 | 0        | 0.001808 | 0 | 0 | 0 |
| 0        | 0        | 0.00023  | 6.57E-05 | 0        | 0        | 0 | 0 | 0 |
| 0        | 3.29E-05 | 0.00023  | 0        | 0        | 0.000197 | 0 | 0 | 0 |
| 0        | 9.86E-05 | 0.000197 | 0        | 0        | 0        | 0 | 0 | 0 |
| 0        | 0        | 0.000427 | 0        | 0        | 0        | 0 | 0 | 0 |
| 0        | 0.000362 | 0.000296 | 0        | 0.000131 | 0        | 0 | 0 | 0 |

|   |          |          |          |          |          |   |   |   |
|---|----------|----------|----------|----------|----------|---|---|---|
| 0 | 0        | 6.57E-05 | 0        | 0        | 0.000131 | 0 | 0 | 0 |
| 0 | 3.29E-05 | 0        | 0        | 0        | 0        | 0 | 0 | 0 |
| 0 | 6.57E-05 | 0        | 0        | 0        | 3.29E-05 | 0 | 0 | 0 |
| 0 | 0        | 0        | 0        | 0        | 9.86E-05 | 0 | 0 | 0 |
| 0 | 0        | 0        | 0        | 0        | 9.86E-05 | 0 | 0 | 0 |
| 0 | 0.000164 | 0        | 0        | 0        | 0        | 0 | 0 | 0 |
| 0 | 0        | 0        | 0        | 0        | 0        | 0 | 0 | 0 |
| 0 | 0.000296 | 0        | 0        | 0        | 9.86E-05 | 0 | 0 | 0 |
| 0 | 0        | 0        | 0        | 0        | 0        | 0 | 0 | 0 |
| 0 | 0        | 0        | 0        | 0        | 0        | 0 | 0 | 0 |
| 0 | 0        | 0        | 0        | 0        | 0        | 0 | 0 | 0 |
| 0 | 0.015878 | 0        | 0        | 0.000855 | 0.012755 | 0 | 0 | 0 |
| 0 | 0        | 0        | 0        | 0        | 0.000131 | 0 | 0 | 0 |
| 0 | 0.000723 | 0        | 0        | 0        | 0.000329 | 0 | 0 | 0 |
| 0 | 0.001808 | 0        | 0        | 0        | 0.001085 | 0 | 0 | 0 |
| 0 | 0        | 0        | 0        | 0        | 3.29E-05 | 0 | 0 | 0 |
| 0 | 0        | 0        | 0        | 0        | 0        | 0 | 0 | 0 |
| 0 | 0        | 0        | 0        | 0        | 0        | 0 | 0 | 0 |
| 0 | 0        | 0        | 0        | 0        | 0.000592 | 0 | 0 | 0 |
| 0 | 0.001052 | 0        | 0        | 0        | 0.000427 | 0 | 0 | 0 |
| 0 | 0.001611 | 0        | 0        | 0        | 0.001414 | 0 | 0 | 0 |
| 0 | 0.000197 | 0        | 0        | 0        | 3.29E-05 | 0 | 0 | 0 |
| 0 | 0.000888 | 0.000657 | 0.000263 | 0        | 3.29E-05 | 0 | 0 | 0 |
| 0 | 0.00046  | 0.00046  | 0        | 0        | 0        | 0 | 0 | 0 |
| 0 | 0.000493 | 0.000131 | 0        | 0        | 3.29E-05 | 0 | 0 | 0 |
| 0 | 0.001775 | 0        | 0        | 0        | 0.000789 | 0 | 0 | 0 |
| 0 | 0.001249 | 0        | 0        | 0        | 0.000329 | 0 | 0 | 0 |
| 0 | 0.002466 | 0        | 0        | 0        | 0.000329 | 0 | 0 | 0 |
| 0 | 0.006213 | 0        | 0        | 0        | 0.001742 | 0 | 0 | 0 |
| 0 | 9.86E-05 | 0        | 0        | 0        | 0.001019 | 0 | 0 | 0 |
| 0 | 6.57E-05 | 0        | 0        | 0        | 0.000164 | 0 | 0 | 0 |
| 0 | 0.003287 | 0        | 0        | 0        | 0.000164 | 0 | 0 | 0 |
| 0 | 0.016536 | 0        | 0        | 0        | 0.002433 | 0 | 0 | 0 |
| 0 | 0.002268 | 3.29E-05 | 0.000164 | 0        | 0        | 0 | 0 | 0 |
| 0 | 0        | 0        | 0        | 0        | 0.000296 | 0 | 0 | 0 |
| 0 | 0.001545 | 0        | 0        | 0        | 0.003781 | 0 | 0 | 0 |
| 0 | 3.29E-05 | 0        | 0        | 0        | 9.86E-05 | 0 | 0 | 0 |
| 0 | 0.000263 | 0        | 0        | 0        | 0.00023  | 0 | 0 | 0 |
| 0 | 6.57E-05 | 0        | 0        | 0        | 0.000131 | 0 | 0 | 0 |
| 0 | 6.57E-05 | 0        | 0        | 0        | 0        | 0 | 0 | 0 |
| 0 | 0        | 0        | 0        | 0        | 0.000296 | 0 | 0 | 0 |
| 0 | 0.000362 | 3.29E-05 | 0        | 0        | 9.86E-05 | 0 | 0 | 0 |
| 0 | 0        | 0        | 0        | 0        | 3.29E-05 | 0 | 0 | 0 |
| 0 | 0        | 0        | 0        | 0        | 0.000164 | 0 | 0 | 0 |
| 0 | 0        | 0        | 0        | 0        | 9.86E-05 | 0 | 0 | 0 |
| 0 | 3.29E-05 | 0        | 0        | 0        | 0        | 0 | 0 | 0 |
| 0 | 0.000756 | 0        | 0        | 0.000329 | 0.000329 | 0 | 0 | 0 |

|   |          |          |          |          |          |   |   |          |
|---|----------|----------|----------|----------|----------|---|---|----------|
| 0 | 0        | 0        | 0        | 0        | 0        | 0 | 0 | 0        |
| 0 | 0        | 0        | 0        | 0        | 0        | 0 | 0 | 0        |
| 0 | 0.004438 | 0        | 0        | 0        | 0.001841 | 0 | 0 | 0        |
| 0 | 0        | 0        | 0        | 0        | 0        | 0 | 0 | 0        |
| 0 | 0        | 0        | 0        | 0        | 0        | 0 | 0 | 0        |
| 0 | 0.000953 | 0        | 0        | 0        | 0.00046  | 0 | 0 | 0        |
| 0 | 0.000296 | 0        | 0        | 0        | 0.000131 | 0 | 0 | 0        |
| 0 | 0        | 0        | 0        | 0        | 3.29E-05 | 0 | 0 | 0        |
| 0 | 0        | 0        | 0        | 0        | 9.86E-05 | 0 | 0 | 0        |
| 0 | 0        | 0        | 0        | 0        | 0.000526 | 0 | 0 | 0        |
| 0 | 0.000756 | 0        | 0        | 0        | 0        | 0 | 0 | 0        |
| 0 | 9.86E-05 | 0        | 0        | 0        | 0.00023  | 0 | 0 | 0        |
| 0 | 0.000263 | 0        | 0        | 0        | 0        | 0 | 0 | 0        |
| 0 | 0.000164 | 0.00046  | 0.000131 | 0        | 9.86E-05 | 0 | 0 | 0        |
| 0 | 0.000131 | 0.000822 | 0.000197 | 3.29E-05 | 9.86E-05 | 0 | 0 | 0        |
| 0 | 0.001808 | 0        | 0        | 0        | 0.000559 | 0 | 0 | 0        |
| 0 | 0.000723 | 0        | 0        | 0        | 0.000723 | 0 | 0 | 0        |
| 0 | 0.000822 | 0        | 0        | 0        | 0.000296 | 0 | 0 | 0        |
| 0 | 0        | 0        | 0        | 0        | 0.000625 | 0 | 0 | 0        |
| 0 | 0.001808 | 0        | 0        | 0        | 0.001085 | 0 | 0 | 0        |
| 0 | 0        | 0        | 0        | 0        | 0        | 0 | 0 | 0        |
| 0 | 0.000493 | 0        | 0        | 0        | 0.000394 | 0 | 0 | 3.29E-05 |
| 0 | 0        | 0        | 0        | 0        | 0        | 0 | 0 | 0        |
| 0 | 0        | 0        | 0        | 0        | 0        | 0 | 0 | 0        |
| 0 | 0.000986 | 0        | 0        | 0        | 0.000394 | 0 | 0 | 0        |
| 0 | 0.008416 | 0        | 0        | 0        | 0.001841 | 0 | 0 | 0        |
| 0 | 0.001644 | 0        | 0        | 0        | 0        | 0 | 0 | 0        |
| 0 | 0        | 9.86E-05 | 0        | 0        | 0.000592 | 0 | 0 | 0        |
| 0 | 0        | 0        | 0        | 0        | 6.57E-05 | 0 | 0 | 0        |
| 0 | 0.000362 | 0        | 0        | 0        | 0.000394 | 0 | 0 | 0        |
| 0 | 0.00023  | 0        | 0        | 3.29E-05 | 0.000296 | 0 | 0 | 0        |
| 0 | 6.57E-05 | 0        | 0        | 0        | 0        | 0 | 0 | 0        |
| 0 | 0.000296 | 0        | 0        | 0        | 6.57E-05 | 0 | 0 | 0        |
| 0 | 0.000625 | 0        | 0        | 0        | 0        | 0 | 0 | 0        |
| 0 | 0.000329 | 0        | 0        | 0        | 0.000493 | 0 | 0 | 0        |
| 0 | 0.00046  | 0        | 0        | 0        | 9.86E-05 | 0 | 0 | 0        |
| 0 | 0        | 0        | 0        | 0.00046  | 0        | 0 | 0 | 0        |
| 0 | 0        | 0        | 0        | 0        | 0        | 0 | 0 | 0        |
| 0 | 0.000362 | 9.86E-05 | 0.000362 | 0        | 9.86E-05 | 0 | 0 | 0        |
| 0 | 3.29E-05 | 0.000131 | 6.57E-05 | 0        | 0        | 0 | 0 | 0        |
| 0 | 0        | 3.29E-05 | 0.000263 | 0.00023  | 0        | 0 | 0 | 0        |
| 0 | 0.000296 | 0.004668 | 0        | 0        | 0        | 0 | 0 | 0        |
| 0 | 0.00023  | 0.000394 | 0.000625 | 0        | 0        | 0 | 0 | 0        |
| 0 | 0.000197 | 0.000789 | 0.001348 | 0        | 3.29E-05 | 0 | 0 | 0        |
| 0 | 0.000164 | 0.000329 | 0.000427 | 0        | 0        | 0 | 0 | 0        |
| 0 | 0        | 0.000427 | 0.000756 | 0        | 0.005227 | 0 | 0 | 0        |
| 0 | 0.003189 | 0        | 6.57E-05 | 0        | 0.001874 | 0 | 0 | 0        |

|   |          |          |          |   |          |   |   |   |
|---|----------|----------|----------|---|----------|---|---|---|
| 0 | 0.000329 | 0        | 0.000131 | 0 | 0.000493 | 0 | 0 | 0 |
| 0 | 0.000164 | 0        | 0        | 0 | 0        | 0 | 0 | 0 |
| 0 | 0        | 0        | 0        | 0 | 0        | 0 | 0 | 0 |
| 0 | 6.57E-05 | 0        | 0        | 0 | 0        | 0 | 0 | 0 |
| 0 | 0.000953 | 0        | 0        | 0 | 0        | 0 | 0 | 0 |
| 0 | 0.002992 | 0        | 0        | 0 | 0.000263 | 0 | 0 | 0 |
| 0 | 0.000394 | 0.000296 | 0        | 0 | 0.00023  | 0 | 0 | 0 |
| 0 | 0        | 0        | 0        | 0 | 0        | 0 | 0 | 0 |
| 0 | 0        | 0        | 0        | 0 | 0        | 0 | 0 | 0 |
| 0 | 0.001183 | 0        | 0        | 0 | 0.000789 | 0 | 0 | 0 |
| 0 | 0.000756 | 0        | 0        | 0 | 0        | 0 | 0 | 0 |
| 0 | 0        | 0        | 0        | 0 | 0        | 0 | 0 | 0 |
| 0 | 0.00789  | 0        | 0        | 0 | 0.00092  | 0 | 0 | 0 |
| 0 | 0        | 0        | 0        | 0 | 0.000592 | 0 | 0 | 0 |
| 0 | 0        | 0        | 0        | 0 | 0.000592 | 0 | 0 | 0 |
| 0 | 0.000131 | 0        | 0        | 0 | 0.000263 | 0 | 0 | 0 |
| 0 | 3.29E-05 | 0        | 0        | 0 | 9.86E-05 | 0 | 0 | 0 |
| 0 | 0        | 0        | 0        | 0 | 0        | 0 | 0 | 0 |
| 0 | 0        | 0        | 0        | 0 | 0        | 0 | 0 | 0 |
| 0 | 0        | 0        | 0        | 0 | 9.86E-05 | 0 | 0 | 0 |
| 0 | 0        | 0        | 0        | 0 | 0        | 0 | 0 | 0 |
| 0 | 0        | 0        | 0        | 0 | 3.29E-05 | 0 | 0 | 0 |
| 0 | 0.000329 | 0        | 0        | 0 | 3.29E-05 | 0 | 0 | 0 |
| 0 | 0.000394 | 0        | 0        | 0 | 0        | 0 | 0 | 0 |
| 0 | 0        | 0        | 0        | 0 | 0        | 0 | 0 | 0 |
| 0 | 0.000197 | 0        | 0        | 0 | 0.000197 | 0 | 0 | 0 |
| 0 | 9.86E-05 | 0        | 0        | 0 | 0        | 0 | 0 | 0 |
| 0 | 0        | 0        | 0        | 0 | 6.57E-05 | 0 | 0 | 0 |
| 0 | 0.001052 | 0        | 0        | 0 | 0.000296 | 0 | 0 | 0 |
| 0 | 3.29E-05 | 0        | 0        | 0 | 0        | 0 | 0 | 0 |
| 0 | 0        | 0        | 0        | 0 | 0        | 0 | 0 | 0 |
| 0 | 3.29E-05 | 0        | 0        | 0 | 0        | 0 | 0 | 0 |
| 0 | 0.00069  | 0        | 0        | 0 | 0.000362 | 0 | 0 | 0 |
| 0 | 6.57E-05 | 0        | 0        | 0 | 0        | 0 | 0 | 0 |
| 0 | 6.57E-05 | 0.000164 | 0        | 0 | 0        | 0 | 0 | 0 |
| 0 | 0.000559 | 0.000329 | 0        | 0 | 0.000197 | 0 | 0 | 0 |
| 0 | 0.000986 | 0        | 0        | 0 | 0.000723 | 0 | 0 | 0 |
| 0 | 0        | 6.57E-05 | 0        | 0 | 0        | 0 | 0 | 0 |
| 0 | 0.001183 | 0        | 0        | 0 | 0        | 0 | 0 | 0 |
| 0 | 0.00069  | 0        | 0        | 0 | 0        | 0 | 0 | 0 |
| 0 | 0        | 0        | 0        | 0 | 0.000131 | 0 | 0 | 0 |
| 0 | 0        | 0        | 0        | 0 | 0.000329 | 0 | 0 | 0 |
| 0 | 0        | 0        | 0        | 0 | 0.001085 | 0 | 0 | 0 |
| 0 | 0.000164 | 0.000362 | 0        | 0 | 0.000131 | 0 | 0 | 0 |
| 0 | 0.000756 | 6.57E-05 | 6.57E-05 | 0 | 0.000131 | 0 | 0 | 0 |
| 0 | 0        | 0.000526 | 0.000164 | 0 | 0        | 0 | 0 | 0 |
| 0 | 0.000197 | 0.000296 | 0        | 0 | 0        | 0 | 0 | 0 |



|          |          |          |          |          |          |   |   |   |
|----------|----------|----------|----------|----------|----------|---|---|---|
| 0        | 3.29E-05 | 0.000822 | 0.000197 | 0.000625 | 0        | 0 | 0 | 0 |
| 0        | 0        | 0.001052 | 6.57E-05 | 0        | 3.29E-05 | 0 | 0 | 0 |
| 0        | 0.000164 | 0.000164 | 3.29E-05 | 0        | 0.000131 | 0 | 0 | 0 |
| 0        | 0.0024   | 0        | 0        | 0        | 3.29E-05 | 0 | 0 | 0 |
| 0        | 0.00023  | 0        | 0        | 0        | 0.000362 | 0 | 0 | 0 |
| 0        | 0.00069  | 0        | 0.000164 | 0        | 0.00023  | 0 | 0 | 0 |
| 0        | 0.000625 | 0.004602 | 0        | 0        | 0        | 0 | 0 | 0 |
| 0        | 0.000625 | 0.002301 | 0        | 0        | 0.000164 | 0 | 0 | 0 |
| 0        | 0.002137 | 0.003287 | 0        | 0        | 0.00023  | 0 | 0 | 0 |
| 0        | 0.00023  | 0.001578 | 0        | 0        | 0        | 0 | 0 | 0 |
| 0        | 0.000427 | 0.00023  | 0        | 0        | 6.57E-05 | 0 | 0 | 0 |
| 0        | 0.000329 | 0.001414 | 0        | 0        | 0.000197 | 0 | 0 | 0 |
| 0        | 0.000329 | 0.003156 | 0        | 0        | 9.86E-05 | 0 | 0 | 0 |
| 0        | 0        | 0.003024 | 0        | 0        | 0        | 0 | 0 | 0 |
| 0        | 0        | 0        | 0        | 0        | 0        | 0 | 0 | 0 |
| 0        | 0.000296 | 0        | 0        | 0        | 3.29E-05 | 0 | 0 | 0 |
| 0.000131 | 0.000986 | 0        | 0        | 0        | 0.000526 | 0 | 0 | 0 |
| 0        | 6.57E-05 | 0        | 0        | 0        | 0        | 0 | 0 | 0 |
| 0        | 0        | 0        | 0        | 0        | 0.000164 | 0 | 0 | 0 |
| 0        | 0        | 0        | 0        | 0        | 0        | 0 | 0 | 0 |
| 0        | 0        | 0        | 0        | 0        | 0        | 0 | 0 | 0 |
| 0        | 0        | 0        | 0        | 0        | 0        | 0 | 0 | 0 |
| 0        | 0.000329 | 0        | 0        | 0        | 0.000131 | 0 | 0 | 0 |
| 0        | 0        | 0        | 0        | 0        | 0.000329 | 0 | 0 | 0 |
| 0        | 6.57E-05 | 0        | 0        | 0        | 0        | 0 | 0 | 0 |
| 0        | 0        | 0        | 0        | 0        | 0        | 0 | 0 | 0 |
| 0        | 0        | 0        | 0        | 0        | 0        | 0 | 0 | 0 |
| 0        | 0        | 0        | 0        | 0        | 0        | 0 | 0 | 0 |
| 0        | 0.000131 | 0        | 6.57E-05 | 0        | 0        | 0 | 0 | 0 |
| 0        | 0.000296 | 0        | 0        | 0        | 0        | 0 | 0 | 0 |
| 0        | 0        | 0        | 0        | 0        | 0        | 0 | 0 | 0 |
| 0        | 0.000789 | 0        | 0        | 0        | 0.000164 | 0 | 0 | 0 |
| 0        | 0        | 0        | 0        | 0        | 0        | 0 | 0 | 0 |
| 0        | 0        | 0        | 0.001118 | 0        | 0        | 0 | 0 | 0 |
| 0        | 0        | 0        | 6.57E-05 | 0        | 0        | 0 | 0 | 0 |
| 0        | 0.000362 | 0        | 0        | 0        | 0        | 0 | 0 | 0 |
| 0        | 0.005161 | 0        | 0        | 0        | 0.000657 | 0 | 0 | 0 |
| 0        | 0.002367 | 0        | 0        | 0        | 0.00046  | 0 | 0 | 0 |
| 0        | 0.000263 | 0        | 0        | 0        | 0        | 0 | 0 | 0 |
| 0        | 0.001578 | 0        | 0        | 0        | 0.002268 | 0 | 0 | 0 |
| 0        | 0        | 0        | 0        | 0        | 3.29E-05 | 0 | 0 | 0 |
| 0        | 0        | 0        | 0        | 0        | 9.86E-05 | 0 | 0 | 0 |
| 0        | 0        | 0        | 0        | 0        | 0        | 0 | 0 | 0 |
| 0        | 0        | 0        | 0        | 0        | 0.002235 | 0 | 0 | 0 |
| 0        | 0        | 0        | 0        | 0        | 0.000296 | 0 | 0 | 0 |
| 0        | 0.001742 | 0        | 0        | 0        | 0        | 0 | 0 | 0 |
| 0        | 0.000131 | 0        | 3.29E-05 | 0        | 0        | 0 | 0 | 0 |

|          |          |          |          |   |          |   |   |          |
|----------|----------|----------|----------|---|----------|---|---|----------|
| 0        | 0        | 0        | 6.57E-05 | 0 | 0        | 0 | 0 | 0        |
| 0.000164 | 0        | 0        | 0.000164 | 0 | 0.000427 | 0 | 0 | 0        |
| 0        | 0.000723 | 0.00023  | 6.57E-05 | 0 | 0        | 0 | 0 | 3.29E-05 |
| 0        | 0        | 0        | 0        | 0 | 0.000131 | 0 | 0 | 0        |
| 0        | 0.000131 | 0        | 0        | 0 | 0.00023  | 0 | 0 | 0        |
| 0        | 0.000131 | 0        | 0        | 0 | 0.000164 | 0 | 0 | 0        |
| 0        | 0        | 0        | 0        | 0 | 6.57E-05 | 0 | 0 | 0        |
| 0        | 0.000131 | 0        | 0        | 0 | 0.000131 | 0 | 0 | 0        |
| 0        | 3.29E-05 | 0        | 6.57E-05 | 0 | 0.000263 | 0 | 0 | 0        |
| 0        | 0        | 0        | 0        | 0 | 6.57E-05 | 0 | 0 | 0        |
| 0        | 0        | 0        | 0        | 0 | 9.86E-05 | 0 | 0 | 0        |
| 0        | 0        | 0        | 0        | 0 | 0        | 0 | 0 | 0        |
| 0        | 0        | 0        | 0        | 0 | 0        | 0 | 0 | 0        |
| 0        | 0.000329 | 0        | 0        | 0 | 0.000625 | 0 | 0 | 0        |
| 0        | 3.29E-05 | 0        | 0        | 0 | 3.29E-05 | 0 | 0 | 0        |
| 0        | 6.57E-05 | 0        | 0        | 0 | 0        | 0 | 0 | 0        |
| 0        | 3.29E-05 | 0        | 0        | 0 | 0        | 0 | 0 | 0        |
| 0        | 0        | 0        | 3.29E-05 | 0 | 3.29E-05 | 0 | 0 | 0        |
| 0        | 0        | 0        | 0        | 0 | 0.000789 | 0 | 0 | 0        |
| 0        | 0        | 0        | 0        | 0 | 0.000263 | 0 | 0 | 0        |
| 0        | 9.86E-05 | 0        | 0        | 0 | 6.57E-05 | 0 | 0 | 0        |
| 0        | 0.00046  | 0        | 0        | 0 | 0.000263 | 0 | 0 | 0        |
| 0        | 0        | 0        | 0        | 0 | 0        | 0 | 0 | 0        |
| 0        | 3.29E-05 | 0        | 0        | 0 | 0.000263 | 0 | 0 | 0        |
| 0        | 0        | 0        | 0        | 0 | 0        | 0 | 0 | 0        |
| 0        | 0        | 0        | 0        | 0 | 3.29E-05 | 0 | 0 | 0        |
| 0        | 0        | 0        | 0        | 0 | 0        | 0 | 0 | 0        |
| 0        | 9.86E-05 | 0        | 0        | 0 | 6.57E-05 | 0 | 0 | 0        |
| 0        | 0        | 0        | 0        | 0 | 0        | 0 | 0 | 0        |
| 0        | 0.000263 | 0        | 0        | 0 | 6.57E-05 | 0 | 0 | 0        |
| 0        | 6.57E-05 | 0        | 0        | 0 | 0        | 0 | 0 | 0        |
| 0        | 0.001085 | 0        | 0.000197 | 0 | 0        | 0 | 0 | 0        |
| 0        | 0.000855 | 0        | 0        | 0 | 0.000427 | 0 | 0 | 0        |
| 0        | 0        | 0        | 0        | 0 | 0.000362 | 0 | 0 | 0        |
| 0        | 0        | 0        | 0        | 0 | 0.000164 | 0 | 0 | 0        |
| 0        | 0.000986 | 0        | 0        | 0 | 0.000756 | 0 | 0 | 0        |
| 0        | 3.29E-05 | 3.29E-05 | 0.001019 | 0 | 0.000756 | 0 | 0 | 0        |
| 0        | 0.000888 | 0.000625 | 0        | 0 | 0.001742 | 0 | 0 | 0        |
| 0        | 0        | 0        | 0        | 0 | 0.000526 | 0 | 0 | 0        |
| 0        | 0        | 0        | 3.29E-05 | 0 | 0.003682 | 0 | 0 | 0        |
| 0        | 0.000625 | 0        | 0        | 0 | 0.000394 | 0 | 0 | 0        |
| 0        | 3.29E-05 | 0        | 0        | 0 | 0        | 0 | 0 | 0        |
| 0        | 3.29E-05 | 0        | 0.000427 | 0 | 0        | 0 | 0 | 0        |
| 0        | 0        | 0        | 0.001282 | 0 | 0        | 0 | 0 | 0        |
| 0        | 9.86E-05 | 0        | 0        | 0 | 0.000164 | 0 | 0 | 0        |
| 0        | 0.001874 | 3.29E-05 | 0        | 0 | 0.008843 | 0 | 0 | 0        |
| 0        | 0.004668 | 0        | 0        | 0 | 0.001315 | 0 | 0 | 0        |

|   |          |          |          |          |          |   |   |          |
|---|----------|----------|----------|----------|----------|---|---|----------|
| 0 | 0        | 0        | 0        | 0        | 0        | 0 | 0 | 0        |
| 0 | 0        | 0.000362 | 9.86E-05 | 0        | 0.001446 | 0 | 0 | 0        |
| 0 | 0.002334 | 0        | 0        | 0.000131 | 0.000723 | 0 | 0 | 0        |
| 0 | 0.001249 | 0        | 0        | 0        | 0.000526 | 0 | 0 | 0        |
| 0 | 0.000855 | 0        | 0        | 0        | 0.000296 | 0 | 0 | 0        |
| 0 | 0        | 0        | 0        | 0        | 0        | 0 | 0 | 0        |
| 0 | 0.000263 | 0        | 0        | 0        | 0.00023  | 0 | 0 | 0        |
| 0 | 0        | 0        | 0        | 0        | 0        | 0 | 0 | 0        |
| 0 | 0.000197 | 0        | 0        | 0        | 0        | 0 | 0 | 0        |
| 0 | 0        | 0        | 0        | 0        | 0        | 0 | 0 | 0        |
| 0 | 0        | 0        | 0        | 0        | 0        | 0 | 0 | 0        |
| 0 | 0        | 0        | 0        | 0        | 0        | 0 | 0 | 0        |
| 0 | 0        | 0        | 0        | 0        | 6.57E-05 | 0 | 0 | 0        |
| 0 | 0        | 0        | 0        | 0        | 0        | 0 | 0 | 0        |
| 0 | 9.86E-05 | 0        | 0        | 0        | 3.29E-05 | 0 | 0 | 0        |
| 0 | 0.000263 | 0        | 0        | 0        | 0.000131 | 0 | 0 | 0        |
| 0 | 0        | 0        | 0        | 0        | 0.00023  | 0 | 0 | 0        |
| 0 | 9.86E-05 | 0        | 0        | 0        | 0.000131 | 0 | 0 | 0        |
| 0 | 0.000197 | 0        | 0        | 0        | 0.000427 | 0 | 0 | 0        |
| 0 | 0.001479 | 0        | 0        | 0        | 0.000789 | 0 | 0 | 0        |
| 0 | 0.000625 | 0        | 0        | 0        | 0.000164 | 0 | 0 | 0        |
| 0 | 0.00046  | 0        | 0        | 0.000329 | 0.000493 | 0 | 0 | 0        |
| 0 | 0.001118 | 0        | 0        | 0        | 0.000197 | 0 | 0 | 0        |
| 0 | 0        | 0        | 0        | 0        | 0        | 0 | 0 | 0        |
| 0 | 0.001611 | 0        | 0        | 0        | 0.000197 | 0 | 0 | 0        |
| 0 | 0        | 0        | 0        | 0        | 0        | 0 | 0 | 0        |
| 0 | 0.001545 | 0.000394 | 3.29E-05 | 0        | 0.000394 | 0 | 0 | 0        |
| 0 | 0.000131 | 0.000625 | 9.86E-05 | 0        | 0.000263 | 0 | 0 | 0        |
| 0 | 0.00023  | 0.00023  | 0.000329 | 0        | 0.000131 | 0 | 0 | 0        |
| 0 | 0        | 0        | 0.001512 | 0        | 3.29E-05 | 0 | 0 | 0        |
| 0 | 6.57E-05 | 0.000855 | 0.000394 | 0        | 3.29E-05 | 0 | 0 | 0        |
| 0 | 0.00023  | 0        | 6.57E-05 | 0        | 0.000131 | 0 | 0 | 0        |
| 0 | 6.57E-05 | 0.001151 | 0.000131 | 0        | 6.57E-05 | 0 | 0 | 0        |
| 0 | 0.000131 | 3.29E-05 | 3.29E-05 | 0        | 0        | 0 | 0 | 0        |
| 0 | 0.000131 | 0.000197 | 0.000526 | 0        | 3.29E-05 | 0 | 0 | 0        |
| 0 | 0.000131 | 0        | 0        | 0        | 3.29E-05 | 0 | 0 | 0        |
| 0 | 3.29E-05 | 0.000888 | 0.00046  | 0        | 3.29E-05 | 0 | 0 | 0        |
| 0 | 0.006279 | 0.002268 | 0.000888 | 0        | 0.001151 | 0 | 0 | 0        |
| 0 | 0        | 0.000427 | 0        | 0        | 0        | 0 | 0 | 0        |
| 0 | 0        | 0.005326 | 0.001808 | 0        | 0.00069  | 0 | 0 | 0        |
| 0 | 0.000756 | 0.001742 | 0.001052 | 0        | 0.002104 | 0 | 0 | 0        |
| 0 | 0.00046  | 0.001512 | 0.000888 | 0        | 0.000197 | 0 | 0 | 0        |
| 0 | 0.000756 | 0.000296 | 0.001742 | 0        | 0        | 0 | 0 | 3.29E-05 |
| 0 | 0.007199 | 0.000197 | 0        | 0        | 0.002071 | 0 | 0 | 9.86E-05 |
| 0 | 0.006871 | 0        | 0        | 0        | 0.001677 | 0 | 0 | 0        |
| 0 | 0.000263 | 0        | 6.57E-05 | 0        | 0.001249 | 0 | 0 | 0        |
| 0 | 0.001808 | 0        | 0        | 0.000296 | 0.030967 | 0 | 0 | 0        |

|          |          |          |          |          |          |   |   |   |
|----------|----------|----------|----------|----------|----------|---|---|---|
| 0        | 0.000427 | 0        | 0        | 0        | 0.000296 | 0 | 0 | 0 |
| 0        | 0.00069  | 0        | 0        | 0        | 0        | 0 | 0 | 0 |
| 0        | 0.000164 | 0        | 0        | 0        | 0.000197 | 0 | 0 | 0 |
| 0        | 3.29E-05 | 0        | 0        | 0        | 0        | 0 | 0 | 0 |
| 0.000263 | 0.000296 | 0        | 0        | 0        | 0.000625 | 0 | 0 | 0 |
| 0        | 0        | 0.000592 | 0.000756 | 0        | 6.57E-05 | 0 | 0 | 0 |
| 0        | 0.000855 | 0.001151 | 0        | 0        | 0.00023  | 0 | 0 | 0 |
| 0        | 6.57E-05 | 6.57E-05 | 0        | 0        | 0.000164 | 0 | 0 | 0 |
| 0        | 0.000131 | 0.003386 | 0.004142 | 0        | 0.000131 | 0 | 0 | 0 |
| 0        | 3.29E-05 | 0.000625 | 0.00069  | 0        | 0        | 0 | 0 | 0 |
| 0        | 6.57E-05 | 0.000953 | 0.001348 | 0        | 0        | 0 | 0 | 0 |
| 0        | 0        | 0.00023  | 6.57E-05 | 0        | 6.57E-05 | 0 | 0 | 0 |
| 0        | 3.29E-05 | 0.003386 | 0.00023  | 0        | 0        | 0 | 0 | 0 |
| 0        | 0.000986 | 0        | 0        | 0        | 0.000329 | 0 | 0 | 0 |
| 0        | 0.000197 | 0        | 0        | 0        | 0.000329 | 0 | 0 | 0 |
| 0        | 0.000427 | 0        | 0        | 0        | 0.00046  | 0 | 0 | 0 |
| 0        | 0.000263 | 0.000362 | 0        | 0        | 0.000625 | 0 | 0 | 0 |
| 0        | 0        | 0        | 0        | 0        | 0.000592 | 0 | 0 | 0 |
| 0        | 0        | 0        | 0        | 0        | 3.29E-05 | 0 | 0 | 0 |
| 0        | 0        | 0        | 0        | 0        | 0        | 0 | 0 | 0 |
| 0        | 0        | 0        | 0        | 0        | 0.000427 | 0 | 0 | 0 |
| 0        | 0        | 0        | 0        | 0        | 0        | 0 | 0 | 0 |
| 0        | 9.86E-05 | 0        | 0        | 9.86E-05 | 9.86E-05 | 0 | 0 | 0 |
| 0        | 0        | 0        | 0        | 0        | 0        | 0 | 0 | 0 |
| 0        | 0.000493 | 0.000131 | 0.000723 | 0        | 0.000493 | 0 | 0 | 0 |
| 0        | 0        | 0        | 0        | 0        | 0        | 0 | 0 | 0 |
| 0        | 0        | 0        | 3.29E-05 | 0        | 0.000164 | 0 | 0 | 0 |
| 0        | 0        | 0        | 0.00023  | 0        | 6.57E-05 | 0 | 0 | 0 |
| 0        | 0.00046  | 0        | 6.57E-05 | 0        | 0        | 0 | 0 | 0 |
| 0        | 0.002959 | 0        | 9.86E-05 | 0        | 0.001348 | 0 | 0 | 0 |
| 0        | 3.29E-05 | 0        | 0        | 0        | 0        | 0 | 0 | 0 |
| 0        | 0        | 0        | 0        | 0        | 3.29E-05 | 0 | 0 | 0 |
| 0        | 3.29E-05 | 3.29E-05 | 0        | 0        | 0        | 0 | 0 | 0 |
| 0        | 0.000296 | 0        | 0        | 0        | 0.001019 | 0 | 0 | 0 |
| 0        | 0.00046  | 0        | 0        | 0        | 0.00046  | 0 | 0 | 0 |
| 0        | 0.000164 | 0        | 0        | 0        | 0        | 0 | 0 | 0 |
| 0        | 9.86E-05 | 0        | 0        | 0        | 0.029258 | 0 | 0 | 0 |
| 0        | 0.000559 | 0        | 0        | 0        | 0.000164 | 0 | 0 | 0 |
| 0        | 0.00023  | 0        | 0        | 0        | 3.29E-05 | 0 | 0 | 0 |
| 0        | 0.004833 | 0        | 0        | 0        | 0.001151 | 0 | 0 | 0 |
| 0        | 0        | 0        | 0        | 0        | 0        | 0 | 0 | 0 |
| 0        | 0        | 0        | 0        | 0        | 0        | 0 | 0 | 0 |
| 0        | 0.000131 | 0        | 0        | 0        | 0        | 0 | 0 | 0 |
| 0        | 3.29E-05 | 0        | 0        | 0        | 3.29E-05 | 0 | 0 | 0 |
| 0        | 0        | 0        | 0        | 0        | 9.86E-05 | 0 | 0 | 0 |
| 0        | 0.001644 | 0        | 0        | 0        | 0.000263 | 0 | 0 | 0 |
| 0        | 9.86E-05 | 0        | 0        | 0        | 0.000197 | 0 | 0 | 0 |

|   |          |          |          |          |          |          |          |   |
|---|----------|----------|----------|----------|----------|----------|----------|---|
| 0 | 0        | 0        | 0.001512 | 0        | 3.29E-05 | 0        | 0        | 0 |
| 0 | 0        | 0        | 0.001874 | 0        | 0        | 0        | 0        | 0 |
| 0 | 0.000197 | 0        | 0.005063 | 3.29E-05 | 0.000131 | 0        | 0        | 0 |
| 0 | 0        | 0        | 6.57E-05 | 0        | 0.000164 | 0        | 0        | 0 |
| 0 | 0.000197 | 0        | 0.000888 | 0        | 0.000263 | 0        | 0        | 0 |
| 0 | 0        | 0        | 0        | 0        | 9.86E-05 | 0        | 0        | 0 |
| 0 | 0.003616 | 0        | 0        | 0        | 0.000888 | 0        | 0        | 0 |
| 0 | 0.006115 | 0        | 6.57E-05 | 0        | 0.002696 | 0        | 0        | 0 |
| 0 | 0.001216 | 0        | 0        | 0        | 0.000394 | 0        | 0        | 0 |
| 0 | 0.00069  | 9.86E-05 | 0        | 0        | 0.00046  | 0        | 0        | 0 |
| 0 | 6.57E-05 | 0        | 0        | 0        | 6.57E-05 | 0        | 0        | 0 |
| 0 | 6.57E-05 | 0        | 0        | 0        | 0        | 0        | 0        | 0 |
| 0 | 0.004865 | 0        | 0        | 0        | 6.57E-05 | 0        | 0        | 0 |
| 0 | 0.004142 | 0        | 3.29E-05 | 0        | 0.002071 | 0        | 0        | 0 |
| 0 | 3.29E-05 | 3.29E-05 | 0        | 0        | 0.000559 | 0        | 0        | 0 |
| 0 | 0.001183 | 0        | 0        | 0        | 0.002827 | 3.29E-05 | 6.57E-05 | 0 |
| 0 | 0.00046  | 0        | 0        | 9.86E-05 | 0.00069  | 0        | 0        | 0 |
| 0 | 0.001742 | 0        | 0        | 0        | 0.000394 | 0        | 0        | 0 |
| 0 | 0.000362 | 0        | 0        | 0        | 0.00046  | 0        | 0        | 0 |
| 0 | 0        | 0        | 0        | 0        | 0.000164 | 0        | 0        | 0 |
| 0 | 0.001545 | 0        | 0        | 0        | 0.000592 | 0        | 0        | 0 |
| 0 | 3.29E-05 | 0        | 0        | 0        | 0.000131 | 0        | 0        | 0 |
| 0 | 0.000263 | 0        | 0        | 0        | 0.001446 | 0        | 0        | 0 |
| 0 | 0        | 0        | 0        | 0        | 0.00023  | 0        | 0        | 0 |
| 0 | 0        | 0        | 0.000493 | 0        | 0        | 0        | 0        | 0 |
| 0 | 0        | 0        | 0        | 0        | 0.000559 | 0        | 0        | 0 |
| 0 | 0        | 0        | 0        | 0        | 0        | 0        | 0        | 0 |
| 0 | 0.00092  | 0.000131 | 0        | 0        | 0.000986 | 0        | 0        | 0 |
| 0 | 0.00217  | 0.001644 | 0        | 0        | 0.000197 | 0        | 0        | 0 |
| 0 | 3.29E-05 | 0        | 0        | 0        | 0.000131 | 0        | 0        | 0 |
| 0 | 0.001118 | 0        | 0        | 0        | 0.000493 | 0        | 0        | 0 |
| 0 | 9.86E-05 | 0        | 0        | 0        | 0        | 0        | 0        | 0 |
| 0 | 0.000329 | 0        | 0        | 0        | 3.29E-05 | 0        | 0        | 0 |
| 0 | 3.29E-05 | 0        | 0        | 0        | 3.29E-05 | 0        | 0        | 0 |
| 0 | 0.000164 | 0        | 0        | 0        | 9.86E-05 | 0        | 0        | 0 |
| 0 | 9.86E-05 | 0        | 0        | 0        | 9.86E-05 | 0        | 0        | 0 |
| 0 | 0        | 0.003189 | 0        | 0        | 0.000131 | 0        | 0        | 0 |
| 0 | 0        | 0        | 0        | 0        | 0.002038 | 0        | 0        | 0 |
| 0 | 0        | 0        | 0        | 0        | 3.29E-05 | 0        | 0        | 0 |
| 0 | 0.001052 | 0        | 0        | 0        | 0.00046  | 0        | 0        | 0 |
| 0 | 0        | 0        | 0        | 0        | 3.29E-05 | 0        | 0        | 0 |
| 0 | 0.001151 | 0.001677 | 0.004339 | 0        | 0.00023  | 0        | 0        | 0 |
| 0 | 0        | 0.000263 | 0.000131 | 0        | 0.000592 | 0        | 0        | 0 |
| 0 | 0.00023  | 0.002696 | 0.001052 | 0        | 0.000164 | 0        | 0        | 0 |
| 0 | 0.001052 | 0.003123 | 0.004504 | 0        | 0.000197 | 0        | 0        | 0 |
| 0 | 0        | 0.000329 | 0.000131 | 0        | 0.002203 | 0        | 0        | 0 |
| 0 | 9.86E-05 | 9.86E-05 | 0        | 0        | 0        | 0        | 0        | 0 |

|   |          |          |          |          |          |   |   |   |
|---|----------|----------|----------|----------|----------|---|---|---|
| 0 | 3.29E-05 | 0        | 0        | 0        | 0.000493 | 0 | 0 | 0 |
| 0 | 0.002663 | 0        | 3.29E-05 | 0        | 0.000296 | 0 | 0 | 0 |
| 0 | 9.86E-05 | 0        | 6.57E-05 | 0        | 0        | 0 | 0 | 0 |
| 0 | 0.000329 | 0        | 9.86E-05 | 0        | 0.000131 | 0 | 0 | 0 |
| 0 | 0.000855 | 0.000197 | 0        | 0.000131 | 0.000625 | 0 | 0 | 0 |
| 0 | 0.003353 | 6.57E-05 | 0.00023  | 0        | 0.000789 | 0 | 0 | 0 |
| 0 | 9.86E-05 | 0.001052 | 0.00332  | 0        | 0.000263 | 0 | 0 | 0 |
| 0 | 0.000263 | 0.001118 | 0.001972 | 0        | 9.86E-05 | 0 | 0 | 0 |
| 0 | 0        | 0        | 0.000362 | 0        | 0.000131 | 0 | 0 | 0 |
| 0 | 0        | 0.000164 | 0.0024   | 0        | 3.29E-05 | 0 | 0 | 0 |
| 0 | 3.29E-05 | 0.000296 | 0.000263 | 0        | 0.000197 | 0 | 0 | 0 |
| 0 | 9.86E-05 | 0        | 0        | 0        | 3.29E-05 | 0 | 0 | 0 |
| 0 | 0.000131 | 0        | 0        | 0        | 0        | 0 | 0 | 0 |
| 0 | 0.000789 | 0        | 0        | 0        | 0.000197 | 0 | 0 | 0 |
| 0 | 0.000164 | 0        | 0        | 0        | 0.000164 | 0 | 0 | 0 |
| 0 | 0        | 0        | 3.29E-05 | 0        | 0        | 0 | 0 | 0 |
| 0 | 0        | 0        | 0        | 0        | 3.29E-05 | 0 | 0 | 0 |
| 0 | 0        | 0        | 6.57E-05 | 0        | 0        | 0 | 0 | 0 |
| 0 | 0        | 0        | 3.29E-05 | 0        | 0        | 0 | 0 | 0 |
| 0 | 0.000263 | 0        | 0        | 0        | 0.00023  | 0 | 0 | 0 |
| 0 | 9.86E-05 | 0        | 0        | 0        | 3.29E-05 | 0 | 0 | 0 |
| 0 | 0        | 0        | 0        | 0        | 0        | 0 | 0 | 0 |
| 0 | 0        | 0        | 6.57E-05 | 0        | 0        | 0 | 0 | 0 |
| 0 | 6.57E-05 | 0        | 0        | 0        | 0        | 0 | 0 | 0 |
| 0 | 0        | 0        | 6.57E-05 | 0        | 3.29E-05 | 0 | 0 | 0 |
| 0 | 0.000427 | 0        | 0        | 0        | 0.000197 | 0 | 0 | 0 |
| 0 | 0.000263 | 0        | 0        | 0        | 6.57E-05 | 0 | 0 | 0 |
| 0 | 0.000329 | 0        | 0        | 0        | 6.57E-05 | 0 | 0 | 0 |
| 0 | 3.29E-05 | 0        | 0        | 0        | 6.57E-05 | 0 | 0 | 0 |
| 0 | 0        | 0        | 0        | 0        | 0        | 0 | 0 | 0 |
| 0 | 0.000493 | 0        | 0        | 0        | 9.86E-05 | 0 | 0 | 0 |
| 0 | 0        | 0        | 0        | 0        | 0        | 0 | 0 | 0 |
| 0 | 0.000625 | 0        | 0        | 0        | 6.57E-05 | 0 | 0 | 0 |
| 0 | 0.001151 | 0        | 0        | 0        | 0.000263 | 0 | 0 | 0 |
| 0 | 0        | 0        | 0        | 0        | 0        | 0 | 0 | 0 |
| 0 | 0.001348 | 0.000296 | 3.29E-05 | 0        | 0.000394 | 0 | 0 | 0 |
| 0 | 0        | 0.000263 | 9.86E-05 | 0        | 3.29E-05 | 0 | 0 | 0 |
| 0 | 0        | 0.00023  | 0        | 0        | 0        | 0 | 0 | 0 |
| 0 | 0.001709 | 0.000888 | 0.000986 | 0        | 0.00069  | 0 | 0 | 0 |
| 0 | 0.000986 | 0.001282 | 0        | 0        | 0.000164 | 0 | 0 | 0 |
| 0 | 0.000131 | 0.002038 | 0        | 0        | 0.000263 | 0 | 0 | 0 |
| 0 | 6.57E-05 | 0        | 0        | 0        | 3.29E-05 | 0 | 0 | 0 |
| 0 | 3.29E-05 | 0        | 0.00023  | 0        | 9.86E-05 | 0 | 0 | 0 |
| 0 | 0        | 0        | 0        | 0        | 0.000362 | 0 | 0 | 0 |
| 0 | 0.00023  | 6.57E-05 | 0        | 0        | 0.000164 | 0 | 0 | 0 |
| 0 | 3.29E-05 | 0        | 0        | 0        | 6.57E-05 | 0 | 0 | 0 |
| 0 | 3.29E-05 | 0        | 0        | 0        | 9.86E-05 | 0 | 0 | 0 |

|   |          |          |          |   |          |   |   |   |
|---|----------|----------|----------|---|----------|---|---|---|
| 0 | 0.001019 | 0        | 0        | 0 | 0        | 0 | 0 | 0 |
| 0 | 0.000197 | 0        | 0        | 0 | 0.000296 | 0 | 0 | 0 |
| 0 | 0        | 0        | 0        | 0 | 9.86E-05 | 0 | 0 | 0 |
| 0 | 0.000822 | 0        | 0        | 0 | 0.000427 | 0 | 0 | 0 |
| 0 | 3.29E-05 | 0        | 0        | 0 | 6.57E-05 | 0 | 0 | 0 |
| 0 | 0        | 0        | 0.000986 | 0 | 9.86E-05 | 0 | 0 | 0 |
| 0 | 0.001052 | 0        | 0.001972 | 0 | 9.86E-05 | 0 | 0 | 0 |
| 0 | 0        | 0        | 0.000131 | 0 | 0        | 0 | 0 | 0 |
| 0 | 0        | 0        | 0        | 0 | 0        | 0 | 0 | 0 |
| 0 | 0        | 0        | 0        | 0 | 9.86E-05 | 0 | 0 | 0 |
| 0 | 9.86E-05 | 0        | 0        | 0 | 0        | 0 | 0 | 0 |
| 0 | 0        | 0        | 0        | 0 | 0        | 0 | 0 | 0 |
| 0 | 0.001644 | 3.29E-05 | 3.29E-05 | 0 | 0.000197 | 0 | 0 | 0 |
| 0 | 0.001479 | 3.29E-05 | 0.000197 | 0 | 0.001644 | 0 | 0 | 0 |
| 0 | 3.29E-05 | 0.000362 | 0        | 0 | 0        | 0 | 0 | 0 |
| 0 | 0        | 0.000131 | 3.29E-05 | 0 | 6.57E-05 | 0 | 0 | 0 |
| 0 | 0.000131 | 3.29E-05 | 0        | 0 | 0.000164 | 0 | 0 | 0 |
| 0 | 0.000131 | 0.000526 | 0.000329 | 0 | 0.000131 | 0 | 0 | 0 |
| 0 | 3.29E-05 | 0.000263 | 0.000131 | 0 | 0        | 0 | 0 | 0 |
| 0 | 0        | 9.86E-05 | 0        | 0 | 0        | 0 | 0 | 0 |
| 0 | 0        | 0.000789 | 0        | 0 | 0        | 0 | 0 | 0 |
| 0 | 0.000625 | 0.000427 | 0.000723 | 0 | 0.000362 | 0 | 0 | 0 |
| 0 | 0.000131 | 6.57E-05 | 0        | 0 | 6.57E-05 | 0 | 0 | 0 |

| k_Bacteri |
|-----------|-----------|-----------|-----------|-----------|-----------|-----------|-----------|-----------|
| 0.000296  | 0.000296  | 0         | 3.29E-05  | 0         | 0         | 0         | 0         | 0         |
| 0.000131  | 3.29E-05  | 0         | 0         | 0         | 0         | 0         | 0         | 0         |
| 0         | 0         | 0         | 0         | 0         | 0         | 0         | 0         | 0         |
| 6.57E-05  | 0         | 0         | 0         | 0         | 0         | 0         | 3.29E-05  | 0         |
| 0         | 0         | 0         | 0         | 0         | 3.29E-05  | 0         | 0         | 0         |
| 0         | 0         | 0         | 0         | 0         | 0         | 0         | 0         | 0         |
| 3.29E-05  | 0         | 0         | 0         | 0         | 0.000164  | 0         | 0         | 0         |
| 6.57E-05  | 0         | 0         | 0         | 0         | 3.29E-05  | 0         | 0         | 0         |
| 0.002005  | 0.000822  | 0         | 3.29E-05  | 0         | 0         | 0         | 0.000493  | 0         |
| 6.57E-05  | 0.000197  | 0         | 3.29E-05  | 0         | 3.29E-05  | 0         | 3.29E-05  | 0         |
| 0.00023   | 0         | 0         | 0         | 0         | 0         | 0         | 0         | 0         |
| 6.57E-05  | 0         | 0         | 0.001151  | 0         | 3.29E-05  | 0         | 9.86E-05  | 0         |
| 0.009172  | 0.001775  | 0         | 0.000526  | 0         | 0         | 0         | 0.000131  | 0.000427  |
| 0.000526  | 9.86E-05  | 0         | 0.01601   | 0         | 0.001019  | 0         | 0.005293  | 0         |
| 0.000756  | 0.000394  | 0         | 0.00595   | 0         | 0.000526  | 0         | 0.002104  | 0         |
| 0.002104  | 0         | 0         | 0.001249  | 0         | 6.57E-05  | 0         | 9.86E-05  | 0         |
| 0.032611  | 0.004931  | 0         | 0.044479  | 0         | 0.002827  | 0         | 0.023571  | 0         |
| 0         | 0         | 0         | 0         | 0         | 0         | 0         | 0         | 0         |
| 0         | 3.29E-05  | 0         | 0.001052  | 0         | 0.000197  | 0         | 0.000263  | 0         |
| 0.000394  | 9.86E-05  | 0         | 0.000822  | 0         | 0         | 0         | 0.000164  | 0         |
| 0.000723  | 0.000263  | 0         | 0         | 0         | 0         | 0         | 3.29E-05  | 0         |
| 0.000164  | 3.29E-05  | 0         | 9.86E-05  | 0         | 0         | 0         | 0.000131  | 0         |
| 0.000427  | 0.000493  | 0         | 0         | 0         | 0         | 0         | 0         | 0         |
| 0         | 0         | 0         | 0         | 0         | 3.29E-05  | 0         | 0         | 0         |
| 0         | 0         | 0         | 0         | 0         | 0         | 0         | 0         | 0         |
| 0         | 0         | 0         | 0         | 0         | 0         | 0         | 0         | 0         |
| 0         | 9.86E-05  | 0         | 0         | 0         | 0         | 0         | 3.29E-05  | 0         |
| 0         | 0         | 0         | 0.001972  | 0         | 0.000164  | 0         | 0.002203  | 0         |
| 0         | 0         | 0         | 0.003222  | 0         | 0.00046   | 0         | 0.007594  | 0         |
| 0.000197  | 0         | 0         | 0.002268  | 0         | 0.000164  | 0         | 0.001874  | 0         |
| 0.000131  | 9.86E-05  | 0         | 0.007265  | 0         | 9.86E-05  | 0         | 0.00092   | 0         |
| 0.000197  | 0         | 0         | 0         | 0         | 0         | 0         | 0.000723  | 0         |
| 0.002531  | 0.000427  | 0         | 0.002827  | 0         | 0.000855  | 0         | 0.002564  | 0         |
| 3.29E-05  | 3.29E-05  | 0         | 0.001611  | 0         | 0.002466  | 0         | 0.019856  | 0         |
| 0         | 0         | 0         | 0.000164  | 0         | 0.00023   | 0         | 0.004833  | 0         |
| 0         | 0         | 0         | 0.000131  | 0         | 0.002531  | 0         | 0.06542   | 0         |
| 9.86E-05  | 0.000164  | 0         | 3.29E-05  | 0         | 0.000131  | 0         | 3.29E-05  | 0         |
| 0.000789  | 0.000493  | 0         | 0.001019  | 0         | 0.001611  | 0         | 0.000329  | 0         |
| 0         | 0         | 0         | 0.000526  | 0         | 0.000986  | 0         | 0.000723  | 0         |
| 0         | 0.000329  | 0         | 6.57E-05  | 0         | 0.000263  | 0         | 0.000559  | 0         |
| 0         | 9.86E-05  | 0         | 0.00355   | 0         | 0.000559  | 0         | 0.00046   | 0         |
| 0.000197  | 0         | 0         | 0         | 0         | 0         | 0         | 0.000164  | 0         |
| 0.000657  | 0.000559  | 0         | 0         | 0         | 6.57E-05  | 0         | 0.000197  | 0         |
| 0         | 0         | 0         | 0.00023   | 0         | 0.000197  | 0         | 0.002992  | 0         |





|          |          |   |          |          |          |   |          |   |
|----------|----------|---|----------|----------|----------|---|----------|---|
| 3.29E-05 | 0        | 0 | 0        | 0        | 6.57E-05 | 0 | 0        | 0 |
| 0        | 0        | 0 | 6.57E-05 | 0        | 3.29E-05 | 0 | 6.57E-05 | 0 |
| 0        | 0        | 0 | 0        | 0        | 3.29E-05 | 0 | 0        | 0 |
| 0.000592 | 0.000131 | 0 | 0.000986 | 0        | 0.000592 | 0 | 0.001874 | 0 |
| 0        | 0        | 0 | 0        | 0        | 0.000296 | 0 | 0        | 0 |
| 0        | 6.57E-05 | 0 | 0.000394 | 0        | 0        | 0 | 0        | 0 |
| 0        | 0        | 0 | 3.29E-05 | 0        | 0        | 0 | 3.29E-05 | 0 |
| 3.29E-05 | 0        | 0 | 0        | 0        | 0        | 0 | 6.57E-05 | 0 |
| 0        | 0        | 0 | 0.000394 | 0        | 0        | 0 | 0        | 0 |
| 3.29E-05 | 0.000131 | 0 | 0.002235 | 0        | 0        | 0 | 0        | 0 |
| 6.57E-05 | 0.000164 | 0 | 0.000427 | 0        | 0        | 0 | 0        | 0 |
| 3.29E-05 | 0        | 0 | 0.000493 | 0        | 0        | 0 | 3.29E-05 | 0 |
| 0.000913 | 0.000211 | 0 | 0        | 0        | 0        | 0 | 0        | 0 |
| 0.001348 | 0        | 0 | 0.000789 | 0        | 9.86E-05 | 0 | 0.005884 | 0 |
| 0.00092  | 0.000296 | 0 | 6.57E-05 | 0        | 0        | 0 | 0.001151 | 0 |
| 0.000888 | 0.000164 | 0 | 0        | 0        | 0.000197 | 0 | 0.000822 | 0 |
| 0.005589 | 0.001085 | 0 | 0        | 0        | 6.57E-05 | 0 | 0.019988 | 0 |
| 0.000296 | 9.86E-05 | 0 | 0.000427 | 0        | 0        | 0 | 0.001545 | 0 |
| 0        | 0        | 0 | 0        | 0        | 0        | 0 | 6.57E-05 | 0 |
| 0.00263  | 0.000888 | 0 | 0        | 0        | 0        | 0 | 3.29E-05 | 0 |
| 0.004767 | 0.000329 | 0 | 0        | 0        | 0        | 0 | 0.001052 | 0 |
| 6.57E-05 | 0        | 0 | 0.000526 | 0        | 0.00023  | 0 | 3.29E-05 | 0 |
| 0        | 0        | 0 | 0.000822 | 0        | 0        | 0 | 0.000131 | 0 |
| 3.29E-05 | 0        | 0 | 0.000263 | 0        | 9.86E-05 | 0 | 3.29E-05 | 0 |
| 0        | 0.000197 | 0 | 0.00023  | 0        | 0.000131 | 0 | 0.000296 | 0 |
| 0        | 0        | 0 | 0.000263 | 0        | 0.000164 | 0 | 0.000131 | 0 |
| 0        | 3.29E-05 | 0 | 0        | 0        | 0        | 0 | 0        | 0 |
| 0        | 0        | 0 | 0.008547 | 0        | 3.29E-05 | 0 | 6.57E-05 | 0 |
| 0        | 0        | 0 | 0        | 0        | 0        | 0 | 0        | 0 |
| 3.29E-05 | 6.57E-05 | 0 | 9.86E-05 | 0        | 9.86E-05 | 0 | 6.57E-05 | 0 |
| 0        | 0        | 0 | 3.29E-05 | 0        | 0        | 0 | 0        | 0 |
| 0        | 0        | 0 | 0.000131 | 0        | 9.86E-05 | 0 | 0.000296 | 0 |
| 0.000131 | 6.57E-05 | 0 | 0.000394 | 0        | 0        | 0 | 0.001151 | 0 |
| 0.000131 | 9.86E-05 | 0 | 0.004241 | 6.57E-05 | 6.57E-05 | 0 | 0.002235 | 0 |
| 0.000131 | 9.86E-05 | 0 | 0.021171 | 0        | 0.001381 | 0 | 0.007528 | 0 |
| 0        | 0        | 0 | 0.00812  | 0        | 0.000263 | 0 | 0.005095 | 0 |
| 0        | 3.29E-05 | 0 | 0.003846 | 0        | 0.000329 | 0 | 0.0048   | 0 |
| 0        | 0        | 0 | 0.003024 | 0        | 0.000164 | 0 | 0.000164 | 0 |
| 0        | 0        | 0 | 0.002827 | 0        | 0.000493 | 0 | 0.001578 | 0 |
| 0        | 0        | 0 | 0.005293 | 0        | 0.000526 | 0 | 0.002334 | 0 |
| 0.001479 | 0        | 0 | 0.002893 | 0        | 0.002071 | 0 | 0.013873 | 0 |
| 0.001085 | 0.000329 | 0 | 0.00194  | 0        | 0.000855 | 0 | 0.003748 | 0 |
| 0        | 0        | 0 | 0.00023  | 0        | 9.86E-05 | 0 | 0.001052 | 0 |
| 0        | 0        | 0 | 9.86E-05 | 0        | 3.29E-05 | 0 | 9.86E-05 | 0 |
| 3.29E-05 | 6.57E-05 | 0 | 9.86E-05 | 0        | 0.000329 | 0 | 0.000427 | 0 |
| 0        | 0        | 0 | 0.000131 | 0        | 0.000296 | 0 | 0.00023  | 0 |
| 0.000394 | 0.000131 | 0 | 0        | 0        | 0.00069  | 0 | 0.001183 | 0 |

|          |          |   |          |   |          |          |          |   |
|----------|----------|---|----------|---|----------|----------|----------|---|
| 0        | 0        | 0 | 0.000362 | 0 | 0.000164 | 0        | 0.00046  | 0 |
| 3.29E-05 | 0        | 0 | 0.000296 | 0 | 0.000164 | 0        | 0.000855 | 0 |
| 0        | 0        | 0 | 0.000657 | 0 | 0.000296 | 0        | 0.001052 | 0 |
| 0        | 0        | 0 | 0.00092  | 0 | 6.57E-05 | 0        | 0.000263 | 0 |
| 0        | 0        | 0 | 0.002005 | 0 | 6.57E-05 | 0        | 0.000197 | 0 |
| 6.57E-05 | 0        | 0 | 0        | 0 | 0        | 0        | 0        | 0 |
| 6.57E-05 | 0        | 0 | 0        | 0 | 0        | 0        | 0        | 0 |
| 0.00023  | 9.86E-05 | 0 | 0        | 0 | 0        | 0        | 9.86E-05 | 0 |
| 0        | 0.00023  | 0 | 0        | 0 | 0        | 0        | 0        | 0 |
| 9.86E-05 | 0        | 0 | 0        | 0 | 0        | 0        | 0        | 0 |
| 0        | 0        | 0 | 0        | 0 | 0        | 0        | 0        | 0 |
| 0.012098 | 0.003222 | 0 | 0        | 0 | 0        | 0        | 0        | 0 |
| 0        | 0        | 0 | 0        | 0 | 0        | 0        | 0        | 0 |
| 0.00023  | 0.000164 | 0 | 0        | 0 | 0        | 0        | 0        | 0 |
| 0.001249 | 0.000559 | 0 | 0        | 0 | 0        | 0        | 0        | 0 |
| 0        | 0        | 0 | 3.29E-05 | 0 | 0        | 0        | 3.29E-05 | 0 |
| 0        | 0        | 0 | 0        | 0 | 0        | 0        | 0        | 0 |
| 0        | 0        | 0 | 0        | 0 | 0        | 0        | 3.29E-05 | 0 |
| 0.000855 | 0.000131 | 0 | 0        | 0 | 0        | 0        | 0        | 0 |
| 0.000723 | 0        | 0 | 0        | 0 | 0        | 0        | 0        | 0 |
| 0.004241 | 0.001742 | 0 | 3.29E-05 | 0 | 0.000953 | 0        | 0        | 0 |
| 0        | 3.29E-05 | 0 | 0        | 0 | 0        | 0        | 0        | 0 |
| 0.000263 | 0        | 0 | 0.000197 | 0 | 0.00092  | 0        | 0.00217  | 0 |
| 3.29E-05 | 0        | 0 | 0.000986 | 0 | 0.000592 | 0        | 0.001085 | 0 |
| 3.29E-05 | 0        | 0 | 0.00332  | 0 | 0.001381 | 0        | 0.023406 | 0 |
| 0.001381 | 0.000427 | 0 | 0.000822 | 0 | 0.000164 | 0        | 0.001644 | 0 |
| 0.000559 | 9.86E-05 | 0 | 0.001808 | 0 | 3.29E-05 | 0        | 0.001479 | 0 |
| 0.001775 | 0        | 0 | 0.0024   | 0 | 9.86E-05 | 0        | 0.003518 | 0 |
| 0.002959 | 0.001578 | 0 | 0.000986 | 0 | 0.00023  | 0        | 0.004964 | 0 |
| 0        | 0        | 0 | 0.001578 | 0 | 0.000263 | 0        | 0.000329 | 0 |
| 0.00092  | 0        | 0 | 0.002137 | 0 | 0        | 0        | 0.001052 | 0 |
| 0.000131 | 6.57E-05 | 0 | 0.005194 | 0 | 0        | 0        | 0.001216 | 0 |
| 0.001315 | 0.00332  | 0 | 0.006213 | 0 | 0        | 6.57E-05 | 0.005424 | 0 |
| 0.001446 | 0        | 0 | 0.00332  | 0 | 0.000427 | 0        | 0.002268 | 0 |
| 0.00092  | 0        | 0 | 0.002038 | 0 | 0        | 0        | 0.001545 | 0 |
| 0.000986 | 0.001545 | 0 | 0.003189 | 0 | 0.000592 | 0        | 0.002696 | 0 |
| 0        | 0        | 0 | 0.00023  | 0 | 0        | 0        | 0.000197 | 0 |
| 6.57E-05 | 0.000526 | 0 | 0.002104 | 0 | 0.000329 | 0        | 0.001545 | 0 |
| 0.000131 | 0        | 0 | 0.055952 | 0 | 6.57E-05 | 0        | 0        | 0 |
| 3.29E-05 | 0        | 0 | 0.006213 | 0 | 0        | 0        | 6.57E-05 | 0 |
| 6.57E-05 | 0        | 0 | 0.022585 | 0 | 0.000197 | 0        | 3.29E-05 | 0 |
| 0.000394 | 3.29E-05 | 0 | 0.100299 | 0 | 0        | 0        | 0.00023  | 0 |
| 0        | 0        | 0 | 0.001348 | 0 | 0        | 0        | 0        | 0 |
| 0        | 0        | 0 | 0.003912 | 0 | 0        | 0        | 0        | 0 |
| 0        | 0        | 0 | 0.01167  | 0 | 0        | 0        | 0        | 0 |
| 0        | 0        | 0 | 3.29E-05 | 0 | 0        | 0        | 0.000263 | 0 |
| 0.001446 | 0.000296 | 0 | 0.000526 | 0 | 3.29E-05 | 0        | 9.86E-05 | 0 |

|          |          |   |          |   |          |   |          |   |
|----------|----------|---|----------|---|----------|---|----------|---|
| 0        | 0        | 0 | 0.000131 | 0 | 6.57E-05 | 0 | 0.000756 | 0 |
| 0        | 0        | 0 | 0        | 0 | 0        | 0 | 0        | 0 |
| 0.002597 | 0.00092  | 0 | 0.00023  | 0 | 0.000625 | 0 | 0.004701 | 0 |
| 0        | 0        | 0 | 0        | 0 | 6.57E-05 | 0 | 0        | 0 |
| 0        | 0        | 0 | 0.000131 | 0 | 3.29E-05 | 0 | 0.000263 | 0 |
| 0.000394 | 0.000131 | 0 | 0.000625 | 0 | 3.29E-05 | 0 | 0.000394 | 0 |
| 9.86E-05 | 0        | 0 | 0.000197 | 0 | 0        | 0 | 3.29E-05 | 0 |
| 0        | 0        | 0 | 0.000756 | 0 | 0        | 0 | 0        | 0 |
| 0        | 0        | 0 | 0        | 0 | 3.29E-05 | 0 | 3.29E-05 | 0 |
| 0        | 0        | 0 | 3.29E-05 | 0 | 0.000164 | 0 | 0.00069  | 0 |
| 0.001118 | 0        | 0 | 0        | 0 | 9.86E-05 | 0 | 0.000131 | 0 |
| 0.000197 | 9.86E-05 | 0 | 0.002268 | 0 | 0        | 0 | 0.001874 | 0 |
| 0        | 0        | 0 | 0.000263 | 0 | 0.001644 | 0 | 0.001282 | 0 |
| 3.29E-05 | 0        | 0 | 0.005654 | 0 | 0.001085 | 0 | 0.007035 | 0 |
| 6.57E-05 | 3.29E-05 | 0 | 0.003419 | 0 | 0.000263 | 0 | 0.001216 | 0 |
| 0.001183 | 3.29E-05 | 0 | 0        | 0 | 0        | 0 | 0        | 0 |
| 0.001019 | 0.000131 | 0 | 0        | 0 | 0        | 0 | 0        | 0 |
| 0.000362 | 0.000329 | 0 | 0        | 0 | 0        | 0 | 3.29E-05 | 0 |
| 0.000493 | 0        | 0 | 0        | 0 | 0        | 0 | 0        | 0 |
| 0.001183 | 0        | 0 | 0        | 0 | 0        | 0 | 0        | 0 |
| 0.00069  | 0.000526 | 0 | 0        | 0 | 6.57E-05 | 0 | 0        | 0 |
| 0.000164 | 0        | 0 | 6.57E-05 | 0 | 0        | 0 | 0        | 0 |
| 3.29E-05 | 0        | 0 | 6.57E-05 | 0 | 0        | 0 | 3.29E-05 | 0 |
| 0        | 0        | 0 | 0        | 0 | 0        | 0 | 9.86E-05 | 0 |
| 0.00023  | 0.000394 | 0 | 0.001052 | 0 | 0        | 0 | 6.57E-05 | 0 |
| 0        | 0.003715 | 0 | 0.003781 | 0 | 3.29E-05 | 0 | 0.000559 | 0 |
| 0.002005 | 0        | 0 | 0.001216 | 0 | 0        | 0 | 0.006476 | 0 |
| 0.000789 | 0        | 0 | 0.004307 | 0 | 0        | 0 | 0.00069  | 0 |
| 0        | 0        | 0 | 0.003287 | 0 | 6.57E-05 | 0 | 0.001644 | 0 |
| 0.00023  | 3.29E-05 | 0 | 0.001052 | 0 | 0        | 0 | 0.000493 | 0 |
| 3.29E-05 | 3.29E-05 | 0 | 0.002827 | 0 | 0        | 0 | 0.000526 | 0 |
| 0        | 0        | 0 | 0        | 0 | 0        | 0 | 0        | 0 |
| 0.000164 | 0        | 0 | 0        | 0 | 0        | 0 | 0        | 0 |
| 0        | 0        | 0 | 0        | 0 | 0        | 0 | 0        | 0 |
| 0.000197 | 6.57E-05 | 0 | 0.003813 | 0 | 0        | 0 | 3.29E-05 | 0 |
| 9.86E-05 | 3.29E-05 | 0 | 0.000986 | 0 | 0        | 0 | 0        | 0 |
| 0.002038 | 0.001972 | 0 | 0.054407 | 0 | 0        | 0 | 0        | 0 |
| 0        | 0        | 0 | 0.001216 | 0 | 0        | 0 | 0        | 0 |
| 3.29E-05 | 3.29E-05 | 0 | 0.003189 | 0 | 0.000131 | 0 | 0.000559 | 0 |
| 0        | 0        | 0 | 0.000296 | 0 | 3.29E-05 | 0 | 0.000296 | 0 |
| 0        | 0        | 0 | 0.002104 | 0 | 0.000164 | 0 | 9.86E-05 | 0 |
| 0        | 0.001446 | 0 | 0.000394 | 0 | 0.016141 | 0 | 0.010585 | 0 |
| 9.86E-05 | 0        | 0 | 0.002531 | 0 | 0.000723 | 0 | 0.001874 | 0 |
| 3.29E-05 | 0        | 0 | 0.002531 | 0 | 0.000362 | 0 | 0.000756 | 0 |
| 0        | 0        | 0 | 0.003485 | 0 | 0.000526 | 0 | 0.001249 | 0 |
| 0.014465 | 0.001282 | 0 | 0.00309  | 0 | 0.000723 | 0 | 0.001216 | 0 |
| 0.001578 | 0.00092  | 0 | 0.000263 | 0 | 0.000329 | 0 | 0.001348 | 0 |

|          |          |   |          |   |          |   |          |   |
|----------|----------|---|----------|---|----------|---|----------|---|
| 0.001019 | 3.29E-05 | 0 | 0.000164 | 0 | 3.29E-05 | 0 | 6.57E-05 | 0 |
| 0        | 0        | 0 | 0.003583 | 0 | 0.000427 | 0 | 0.001578 | 0 |
| 0.004076 | 0.000427 | 0 | 0        | 0 | 0        | 0 | 9.86E-05 | 0 |
| 3.29E-05 | 6.57E-05 | 0 | 0        | 0 | 0        | 0 | 0        | 0 |
| 0        | 0        | 0 | 0        | 0 | 0        | 0 | 0        | 0 |
| 0.002203 | 0        | 0 | 0        | 0 | 0        | 0 | 0        | 0 |
| 0        | 0        | 0 | 0.005227 | 0 | 0        | 0 | 0.002466 | 0 |
| 0.000263 | 0        | 0 | 0        | 0 | 0        | 0 | 0        | 0 |
| 0        | 0        | 0 | 0        | 0 | 0        | 0 | 0        | 0 |
| 0.001972 | 0        | 0 | 3.29E-05 | 0 | 0        | 0 | 0.000789 | 0 |
| 0        | 0.000493 | 0 | 0        | 0 | 0        | 0 | 0.000131 | 0 |
| 0        | 0        | 0 | 0.000986 | 0 | 0.002005 | 0 | 0.008975 | 0 |
| 0.004274 | 0.00069  | 0 | 3.29E-05 | 0 | 0        | 0 | 3.29E-05 | 0 |
| 0.000362 | 0        | 0 | 0        | 0 | 0        | 0 | 0.001216 | 0 |
| 0.000329 | 0.000559 | 0 | 0.030047 | 0 | 9.86E-05 | 0 | 0.000822 | 0 |
| 9.86E-05 | 3.29E-05 | 0 | 0.00835  | 0 | 6.57E-05 | 0 | 0.000263 | 0 |
| 0        | 0        | 0 | 0.010092 | 0 | 6.57E-05 | 0 | 0.000131 | 0 |
| 0.000592 | 0        | 0 | 0.005786 | 0 | 0        | 0 | 0.000296 | 0 |
| 3.29E-05 | 0        | 0 | 0.005983 | 0 | 3.29E-05 | 0 | 0.000362 | 0 |
| 0        | 0        | 0 | 0.002038 | 0 | 0        | 0 | 0.000296 | 0 |
| 0        | 0        | 0 | 0.004898 | 0 | 6.57E-05 | 0 | 0.001052 | 0 |
| 0        | 0        | 0 | 0.003123 | 0 | 0.000197 | 0 | 0.003813 | 0 |
| 0        | 0        | 0 | 0.000789 | 0 | 0        | 0 | 9.86E-05 | 0 |
| 0        | 0.000164 | 0 | 0.001512 | 0 | 0        | 0 | 0.003583 | 0 |
| 3.29E-05 | 0        | 0 | 3.29E-05 | 0 | 0        | 0 | 0.000131 | 0 |
| 0.000197 | 6.57E-05 | 0 | 6.57E-05 | 0 | 0        | 0 | 0        | 0 |
| 0        | 0        | 0 | 0        | 0 | 0        | 0 | 0        | 0 |
| 0        | 0        | 0 | 6.57E-05 | 0 | 0        | 0 | 6.57E-05 | 0 |
| 0.000723 | 0.000164 | 0 | 0.000263 | 0 | 0        | 0 | 9.86E-05 | 0 |
| 0        | 0        | 0 | 0        | 0 | 0        | 0 | 0        | 0 |
| 0        | 3.29E-05 | 0 | 6.57E-05 | 0 | 0        | 0 | 0        | 0 |
| 0.000164 | 0        | 0 | 0        | 0 | 0        | 0 | 0        | 0 |
| 0.000427 | 9.86E-05 | 0 | 0        | 0 | 9.86E-05 | 0 | 0.001611 | 0 |
| 0        | 0        | 0 | 0        | 0 | 0.000131 | 0 | 0.000657 | 0 |
| 0        | 0.000329 | 0 | 0.002992 | 0 | 0.000263 | 0 | 0.002268 | 0 |
| 0.000164 | 0        | 0 | 0.008745 | 0 | 0.000296 | 0 | 0.005884 | 0 |
| 0.00092  | 0        | 0 | 0.015286 | 0 | 6.57E-05 | 0 | 0        | 0 |
| 0        | 3.29E-05 | 0 | 0.019692 | 0 | 0.00023  | 0 | 0.000296 | 0 |
| 0.002663 | 0        | 0 | 0.003649 | 0 | 0        | 0 | 0.003353 | 0 |
| 0.000329 | 3.29E-05 | 0 | 0.016338 | 0 | 0        | 0 | 0.000131 | 0 |
| 0        | 0        | 0 | 0.010947 | 0 | 0.000131 | 0 | 0        | 0 |
| 0.000131 | 9.86E-05 | 0 | 0.013873 | 0 | 0.000197 | 0 | 0        | 0 |
| 0        | 0        | 0 | 0.0024   | 0 | 0        | 0 | 0.004602 | 0 |
| 0.000362 | 0        | 0 | 0.000493 | 0 | 6.57E-05 | 0 | 0.000394 | 0 |
| 0.000329 | 0.000197 | 0 | 0.000526 | 0 | 0        | 0 | 0.001151 | 0 |
| 0.000263 | 0.000164 | 0 | 0.000493 | 0 | 0.000164 | 0 | 0.000986 | 0 |
| 0        | 0        | 0 | 0.000329 | 0 | 0        | 0 | 0.000362 | 0 |

|          |          |          |          |   |          |   |          |          |
|----------|----------|----------|----------|---|----------|---|----------|----------|
| 0        | 0        | 0        | 0.001611 | 0 | 0.000493 | 0 | 0.001282 | 0        |
| 0        | 0.000164 | 0        | 0.002663 | 0 | 0.00046  | 0 | 0.002959 | 0        |
| 0        | 0        | 0        | 0.000855 | 0 | 3.29E-05 | 0 | 0.002597 | 0        |
| 0        | 0.001578 | 0        | 0.002827 | 0 | 0        | 0 | 3.29E-05 | 0        |
| 9.86E-05 | 0        | 0        | 0.000657 | 0 | 3.29E-05 | 0 | 3.29E-05 | 0        |
| 0.000625 | 3.29E-05 | 0        | 0.000263 | 0 | 0        | 0 | 0.000592 | 0        |
| 0.000756 | 0        | 0        | 0.013511 | 0 | 0.0024   | 0 | 0.013544 | 0        |
| 0.00023  | 0.000131 | 0        | 0.020415 | 0 | 0.002071 | 0 | 0.011933 | 0        |
| 0.00046  | 0.000131 | 0        | 0.006279 | 0 | 0.001972 | 0 | 0.003222 | 6.57E-05 |
| 3.29E-05 | 0        | 0        | 0.01144  | 0 | 0.003024 | 0 | 0.006936 | 0        |
| 9.86E-05 | 0        | 3.29E-05 | 0.004175 | 0 | 0.000493 | 0 | 0.001611 | 0        |
| 0.000131 | 0.000131 | 0        | 0.032019 | 0 | 0.000723 | 0 | 0.013511 | 0        |
| 6.57E-05 | 0        | 0        | 0.007495 | 0 | 0.00217  | 0 | 0.007725 | 0        |
| 0        | 0        | 0        | 0.002663 | 0 | 0.001216 | 0 | 0.015221 | 0        |
| 0        | 0        | 0        | 0        | 0 | 6.57E-05 | 0 | 0        | 0        |
| 9.86E-05 | 0.000131 | 0        | 0        | 0 | 6.57E-05 | 0 | 0        | 0        |
| 0.00217  | 0.000394 | 0        | 0.000362 | 0 | 0        | 0 | 0        | 0        |
| 6.57E-05 | 0        | 0        | 0.000822 | 0 | 0        | 0 | 9.86E-05 | 0        |
| 3.29E-05 | 0        | 0        | 0        | 0 | 0        | 0 | 0        | 0        |
| 0        | 0        | 0        | 6.57E-05 | 0 | 0        | 0 | 0        | 0        |
| 0        | 0        | 0        | 0        | 0 | 0        | 0 | 0        | 0        |
| 0        | 0        | 0        | 0        | 0 | 0        | 0 | 0        | 0        |
| 3.29E-05 | 0        | 0        | 0        | 0 | 0        | 0 | 0        | 0        |
| 0        | 0        | 0        | 3.29E-05 | 0 | 0        | 0 | 3.29E-05 | 0        |
| 0        | 0        | 0        | 0        | 0 | 0        | 0 | 0        | 0        |
| 0        | 0        | 0        | 0        | 0 | 3.29E-05 | 0 | 0.001216 | 0        |
| 0        | 0        | 0        | 0        | 0 | 0        | 0 | 0.001282 | 0        |
| 6.57E-05 | 3.29E-05 | 0        | 0        | 0 | 0        | 0 | 0.000986 | 0        |
| 0        | 0        | 0        | 0.002301 | 0 | 0.000131 | 0 | 0.000197 | 0        |
| 0.000131 | 0        | 0        | 0.001315 | 0 | 0        | 0 | 6.57E-05 | 0        |
| 0        | 0        | 0        | 0.000164 | 0 | 0        | 0 | 3.29E-05 | 0        |
| 9.86E-05 | 6.57E-05 | 0        | 0.000493 | 0 | 0        | 0 | 0        | 0        |
| 6.57E-05 | 0        | 0        | 0.000296 | 0 | 0        | 0 | 6.57E-05 | 0        |
| 3.29E-05 | 0        | 0        | 0.006575 | 0 | 0.000197 | 0 | 0.000329 | 0        |
| 0        | 0        | 0        | 0.002334 | 0 | 6.57E-05 | 0 | 0.000131 | 0        |
| 6.57E-05 | 0        | 0        | 0.000427 | 0 | 0        | 0 | 9.86E-05 | 0        |
| 0.001183 | 0.000526 | 0        | 6.57E-05 | 0 | 0        | 0 | 0        | 0        |
| 0.00069  | 0.000164 | 0        | 6.57E-05 | 0 | 0        | 0 | 0        | 0        |
| 0        | 0.000131 | 0        | 0        | 0 | 0        | 0 | 0        | 0        |
| 0.001742 | 0.000625 | 0        | 0        | 0 | 0        | 0 | 0        | 0        |
| 0.000131 | 0        | 0        | 0        | 0 | 0        | 0 | 0        | 0        |
| 0        | 0        | 0        | 0        | 0 | 0        | 0 | 0        | 0        |
| 3.29E-05 | 0        | 0        | 0.000131 | 0 | 0        | 0 | 0        | 0        |
| 0.001545 | 0.003189 | 0        | 0        | 0 | 0        | 0 | 3.29E-05 | 0        |
| 3.29E-05 | 9.86E-05 | 0        | 0.002564 | 0 | 0.002367 | 0 | 0.024228 | 0        |
| 0.000625 | 6.57E-05 | 0        | 9.86E-05 | 0 | 6.57E-05 | 0 | 0.002466 | 0        |
| 6.57E-05 | 0.00023  | 0        | 0.001907 | 0 | 0        | 0 | 0.000427 | 0        |

|          |          |   |          |   |          |   |          |   |
|----------|----------|---|----------|---|----------|---|----------|---|
| 0.000362 | 3.29E-05 | 0 | 0.007364 | 0 | 0.000329 | 0 | 0.001578 | 0 |
| 0.000493 | 0.000197 | 0 | 0.003189 | 0 | 3.29E-05 | 0 | 0.000394 | 0 |
| 0        | 0.000197 | 0 | 0.001249 | 0 | 0.000526 | 0 | 0.002071 | 0 |
| 0        | 0        | 0 | 6.57E-05 | 0 | 0        | 0 | 3.29E-05 | 0 |
| 0.000296 | 6.57E-05 | 0 | 0.000131 | 0 | 0        | 0 | 6.57E-05 | 0 |
| 0        | 0        | 0 | 0.000657 | 0 | 0        | 0 | 0        | 0 |
| 0        | 0        | 0 | 0.000427 | 0 | 0.000197 | 0 | 3.29E-05 | 0 |
| 3.29E-05 | 0.000296 | 0 | 0        | 0 | 0        | 0 | 3.29E-05 | 0 |
| 0        | 0        | 0 | 0.00046  | 0 | 9.86E-05 | 0 | 0.000625 | 0 |
| 0        | 0        | 0 | 0.000493 | 0 | 0.000493 | 0 | 0.003583 | 0 |
| 0        | 0        | 0 | 0.000197 | 0 | 0.000164 | 0 | 0.000789 | 0 |
| 0.000131 | 9.86E-05 | 0 | 0        | 0 | 0        | 0 | 0        | 0 |
| 0        | 0        | 0 | 0.000427 | 0 | 0.000559 | 0 | 0.001677 | 0 |
| 0.000657 | 0.000164 | 0 | 0.000131 | 0 | 0        | 0 | 0        | 0 |
| 0        | 0        | 0 | 6.57E-05 | 0 | 3.29E-05 | 0 | 9.86E-05 | 0 |
| 0.000263 | 0.000756 | 0 | 0.000493 | 0 | 0        | 0 | 0.00092  | 0 |
| 9.86E-05 | 0        | 0 | 0.000197 | 0 | 6.57E-05 | 0 | 0.000296 | 0 |
| 3.29E-05 | 3.29E-05 | 0 | 6.57E-05 | 0 | 0.000131 | 0 | 0.002498 | 0 |
| 0.000493 | 0        | 0 | 0        | 0 | 0.000296 | 0 | 0.000559 | 0 |
| 0.000131 | 0        | 0 | 3.29E-05 | 0 | 6.57E-05 | 0 | 9.86E-05 | 0 |
| 0.00023  | 6.57E-05 | 0 | 0.00023  | 0 | 0        | 0 | 0        | 0 |
| 3.29E-05 | 0.000131 | 0 | 0.001414 | 0 | 0.000164 | 0 | 0        | 0 |
| 0.000493 | 0.000427 | 0 | 0.000855 | 0 | 0.000131 | 0 | 0        | 0 |
| 0.002729 | 0.000657 | 0 | 0.000263 | 0 | 0        | 0 | 0        | 0 |
| 0        | 0        | 0 | 9.86E-05 | 0 | 3.29E-05 | 0 | 3.29E-05 | 0 |
| 0        | 0        | 0 | 9.86E-05 | 0 | 6.57E-05 | 0 | 0        | 0 |
| 0        | 0        | 0 | 9.86E-05 | 0 | 3.29E-05 | 0 | 0        | 0 |
| 6.57E-05 | 0        | 0 | 0.000164 | 0 | 3.29E-05 | 0 | 0.000559 | 0 |
| 0.000197 | 0        | 0 | 0.000197 | 0 | 0        | 0 | 9.86E-05 | 0 |
| 3.29E-05 | 0        | 0 | 9.86E-05 | 0 | 0.000131 | 0 | 0.003123 | 0 |
| 0        | 0        | 0 | 3.29E-05 | 0 | 9.86E-05 | 0 | 0.000559 | 0 |
| 0        | 0        | 0 | 0.057859 | 0 | 0        | 0 | 0        | 0 |
| 0.00046  | 0.000197 | 0 | 0.045136 | 0 | 0        | 0 | 0.000263 | 0 |
| 0        | 0        | 0 | 0        | 0 | 0        | 0 | 0.00023  | 0 |
| 0        | 0        | 0 | 0        | 0 | 0        | 0 | 0        | 0 |
| 0.001315 | 0.000526 | 0 | 0.000329 | 0 | 0        | 0 | 0        | 0 |
| 0.001216 | 0        | 0 | 0.003452 | 0 | 0        | 0 | 0.000427 | 0 |
| 0.000427 | 0        | 0 | 0.001742 | 0 | 0        | 0 | 0.002268 | 0 |
| 0        | 0        | 0 | 0.001151 | 0 | 0        | 0 | 0.00526  | 0 |
| 3.29E-05 | 0        | 0 | 6.57E-05 | 0 | 0.000131 | 0 | 0.000131 | 0 |
| 6.57E-05 | 0        | 0 | 0        | 0 | 0        | 0 | 6.57E-05 | 0 |
| 0.000131 | 0        | 0 | 0        | 0 | 0        | 0 | 6.57E-05 | 0 |
| 0.000953 | 0        | 0 | 0.003057 | 0 | 3.29E-05 | 0 | 0.001479 | 0 |
| 0        | 0        | 0 | 0.001677 | 0 | 0.000526 | 0 | 0.002531 | 0 |
| 6.57E-05 | 0        | 0 | 3.29E-05 | 0 | 0.000164 | 0 | 0.002104 | 0 |
| 0.005161 | 0.005819 | 0 | 6.57E-05 | 0 | 0        | 0 | 0.003715 | 0 |
| 0.000427 | 0.001348 | 0 | 0.000953 | 0 | 0        | 0 | 0        | 0 |

|          |          |   |          |          |          |   |          |          |
|----------|----------|---|----------|----------|----------|---|----------|----------|
| 0        | 0        | 0 | 0        | 0        | 0        | 0 | 0.000362 | 0        |
| 0.001742 | 0        | 0 | 0.001611 | 0        | 0        | 0 | 0.001775 | 0        |
| 0.001249 | 0.000263 | 0 | 0        | 0        | 0        | 0 | 0        | 0        |
| 0.001151 | 0.000263 | 0 | 0.00023  | 0        | 0.000197 | 0 | 0.0048   | 0        |
| 0.000296 | 0        | 0 | 0        | 0        | 0        | 0 | 0        | 0        |
| 0        | 0        | 0 | 0        | 0        | 0        | 0 | 0        | 0        |
| 0        | 0        | 0 | 0        | 0        | 0        | 0 | 0        | 0        |
| 0        | 0        | 0 | 0        | 0        | 0        | 0 | 0        | 0        |
| 0        | 0        | 0 | 0        | 0        | 0        | 0 | 0        | 0        |
| 0        | 0        | 0 | 0        | 0        | 3.29E-05 | 0 | 0        | 0        |
| 0        | 0        | 0 | 0        | 0        | 0        | 0 | 0        | 0        |
| 0        | 0        | 0 | 0        | 0        | 3.29E-05 | 0 | 0        | 0        |
| 3.29E-05 | 0        | 0 | 0        | 0        | 0        | 0 | 0        | 0        |
| 0.000197 | 0        | 0 | 0        | 0        | 0        | 0 | 0        | 0        |
| 9.86E-05 | 0        | 0 | 0        | 0        | 0        | 0 | 0        | 0        |
| 9.86E-05 | 0        | 0 | 0        | 0        | 0        | 0 | 0        | 0        |
| 6.57E-05 | 3.29E-05 | 0 | 3.29E-05 | 0        | 0        | 0 | 3.29E-05 | 0        |
| 6.57E-05 | 0.000131 | 0 | 0.001019 | 0        | 0        | 0 | 0.002005 | 0        |
| 9.86E-05 | 0        | 0 | 3.29E-05 | 0        | 0        | 0 | 0.000263 | 0        |
| 0.000657 | 0.000723 | 0 | 9.86E-05 | 0        | 0        | 0 | 0.000493 | 0        |
| 6.57E-05 | 0        | 0 | 0.000394 | 0        | 6.57E-05 | 0 | 0.00046  | 0        |
| 0.000427 | 6.57E-05 | 0 | 0        | 0        | 0        | 0 | 3.29E-05 | 0        |
| 0.000657 | 0.000197 | 0 | 9.86E-05 | 0        | 0        | 0 | 0.000164 | 0        |
| 0        | 0        | 0 | 0.000164 | 0        | 0        | 0 | 0.000131 | 0        |
| 0.001841 | 0.000131 | 0 | 3.29E-05 | 0        | 0        | 0 | 0        | 0        |
| 0.00069  | 0.000756 | 0 | 0.003255 | 0        | 0        | 0 | 6.57E-05 | 0        |
| 0.000723 | 0.00023  | 0 | 9.86E-05 | 0        | 3.29E-05 | 0 | 0.00046  | 0        |
| 6.57E-05 | 0.000164 | 0 | 0.003353 | 0        | 0.00023  | 0 | 0.000526 | 0        |
| 6.57E-05 | 0        | 0 | 0.007331 | 0        | 0.000131 | 0 | 0.00023  | 0        |
| 0        | 0        | 0 | 0.000427 | 0        | 0.000197 | 0 | 0        | 0        |
| 9.86E-05 | 3.29E-05 | 0 | 0.003649 | 9.86E-05 | 0.000888 | 0 | 0.000526 | 0        |
| 9.86E-05 | 0        | 0 | 0.000789 | 0        | 3.29E-05 | 0 | 0.000164 | 0        |
| 0        | 0        | 0 | 0.008777 | 0        | 0.000756 | 0 | 0.000329 | 0        |
| 0.000131 | 6.57E-05 | 0 | 0.001775 | 0        | 3.29E-05 | 0 | 0        | 0        |
| 0        | 0        | 0 | 0.006279 | 0        | 0.000329 | 0 | 0.000625 | 0        |
| 0.00023  | 0        | 0 | 0        | 0        | 3.29E-05 | 0 | 0        | 0        |
| 0        | 0        | 0 | 0.002466 | 0        | 0.000427 | 0 | 0.000822 | 0        |
| 0.006147 | 0.001183 | 0 | 0.02837  | 0        | 0        | 0 | 0.008975 | 0        |
| 0.001315 | 0        | 0 | 0.002005 | 0        | 6.57E-05 | 0 | 0.000756 | 0        |
| 0.000493 | 0.000394 | 0 | 0.013347 | 0        | 0.000296 | 0 | 0.012163 | 3.29E-05 |
| 0.016043 | 0.002137 | 0 | 0.005621 | 0        | 0        | 0 | 0.003813 | 0        |
| 6.57E-05 | 9.86E-05 | 0 | 0.001249 | 0        | 0.000164 | 0 | 0.008909 | 0        |
| 0.000986 | 0.000263 | 0 | 0.023111 | 0        | 0.00046  | 0 | 0.013446 | 0        |
| 0.003945 | 0.00263  | 0 | 0.000657 | 0        | 6.57E-05 | 0 | 0.000625 | 0        |
| 0.001709 | 0.000592 | 0 | 0.000131 | 0        | 0        | 0 | 0        | 0        |
| 0.000822 | 9.86E-05 | 0 | 0.004241 | 0        | 0.000131 | 0 | 0.003222 | 0        |
| 0.093264 | 0.010027 | 0 | 6.57E-05 | 0        | 9.86E-05 | 0 | 0.000164 | 0        |



|          |          |   |          |   |          |   |          |   |
|----------|----------|---|----------|---|----------|---|----------|---|
| 0        | 0        | 0 | 0.001249 | 0 | 0.000296 | 0 | 0.002729 | 0 |
| 0.000657 | 0        | 0 | 0.002959 | 0 | 0.000131 | 0 | 0.000493 | 0 |
| 9.86E-05 | 0.000164 | 0 | 0.000427 | 0 | 0        | 0 | 0        | 0 |
| 0.000131 | 0.000427 | 0 | 0.001972 | 0 | 0.000526 | 0 | 6.57E-05 | 0 |
| 0.002104 | 0        | 0 | 0.000592 | 0 | 0.000394 | 0 | 0.00046  | 0 |
| 3.29E-05 | 0        | 0 | 0.001644 | 0 | 0.000394 | 0 | 0.001019 | 0 |
| 0.000394 | 9.86E-05 | 0 | 0.000493 | 0 | 6.57E-05 | 0 | 0.001282 | 0 |
| 0        | 3.29E-05 | 0 | 0.00023  | 0 | 0        | 0 | 0.000723 | 0 |
| 0        | 3.29E-05 | 0 | 0.001052 | 0 | 0.001085 | 0 | 0.012525 | 0 |
| 6.57E-05 | 0        | 0 | 0.014793 | 0 | 0.000131 | 0 | 0.004668 | 0 |
| 0        | 6.57E-05 | 0 | 0.006443 | 0 | 0.000789 | 0 | 0.001446 | 0 |
| 0        | 0        | 0 | 0.012426 | 0 | 0.000131 | 0 | 0.001644 | 0 |
| 0.000131 | 0        | 0 | 0.001808 | 0 | 0.000131 | 0 | 0.002268 | 0 |
| 0.001085 | 0.000526 | 0 | 0.007956 | 0 | 0.007068 | 0 | 0.032677 | 0 |
| 0.000263 | 0        | 0 | 0.001742 | 0 | 0.000263 | 0 | 0.004142 | 0 |
| 0.000592 | 0.000296 | 0 | 0.002137 | 0 | 0.000263 | 0 | 0.00263  | 0 |
| 0.000822 | 0.000164 | 0 | 0.002268 | 0 | 0        | 0 | 0.000756 | 0 |
| 0.000296 | 9.86E-05 | 0 | 0.00069  | 0 | 0.001183 | 0 | 0.00092  | 0 |
| 0        | 0        | 0 | 0.001118 | 0 | 0.00046  | 0 | 0.00069  | 0 |
| 3.29E-05 | 0        | 0 | 0.000164 | 0 | 0.001479 | 0 | 0.000756 | 0 |
| 0.000197 | 0        | 0 | 0.00286  | 0 | 9.86E-05 | 0 | 0.001019 | 0 |
| 0.000657 | 0        | 0 | 0.003287 | 0 | 0.001611 | 0 | 0.008317 | 0 |
| 0.000131 | 0        | 0 | 0.009468 | 0 | 0.000131 | 0 | 0.006378 | 0 |
| 0.000131 | 0.00023  | 0 | 0.000131 | 0 | 0.000131 | 0 | 0.00263  | 0 |
| 9.86E-05 | 3.29E-05 | 0 | 0.001315 | 0 | 6.57E-05 | 0 | 0.001183 | 0 |
| 0.000526 | 0        | 0 | 0.003189 | 0 | 0.002268 | 0 | 0.018442 | 0 |
| 0        | 0        | 0 | 0.00092  | 0 | 0.000197 | 0 | 0.004602 | 0 |
| 0.00023  | 0        | 0 | 0.000197 | 0 | 6.57E-05 | 0 | 0.000296 | 0 |
| 3.29E-05 | 0        | 0 | 0.001151 | 0 | 6.57E-05 | 0 | 0.001512 | 0 |
| 0.00332  | 0.001611 | 0 | 0.000625 | 0 | 0.001249 | 0 | 0.02219  | 0 |
| 0        | 0        | 0 | 0        | 0 | 0.004044 | 0 | 0.018475 | 0 |
| 0        | 0        | 0 | 6.57E-05 | 0 | 0.000131 | 0 | 0.000197 | 0 |
| 3.29E-05 | 0        | 0 | 0        | 0 | 0.000164 | 0 | 0.00092  | 0 |
| 0.000822 | 0.000197 | 0 | 0.000427 | 0 | 3.29E-05 | 0 | 0.001742 | 0 |
| 0        | 0        | 0 | 0.00069  | 0 | 6.57E-05 | 0 | 0        | 0 |
| 0        | 0        | 0 | 3.29E-05 | 0 | 0        | 0 | 0        | 0 |
| 0.053881 | 0.016536 | 0 | 0.000131 | 0 | 3.29E-05 | 0 | 3.29E-05 | 0 |
| 9.86E-05 | 3.29E-05 | 0 | 3.29E-05 | 0 | 0        | 0 | 9.86E-05 | 0 |
| 3.29E-05 | 0        | 0 | 0        | 0 | 0        | 0 | 0        | 0 |
| 0.005424 | 0.002531 | 0 | 0        | 0 | 0        | 0 | 0        | 0 |
| 0.001414 | 0        | 0 | 0.001578 | 0 | 0        | 0 | 0.002367 | 0 |
| 0        | 0        | 0 | 6.57E-05 | 0 | 0        | 0 | 0        | 0 |
| 0        | 0        | 0 | 0        | 0 | 0        | 0 | 0        | 0 |
| 6.57E-05 | 0        | 0 | 0        | 0 | 0        | 0 | 6.57E-05 | 0 |
| 0        | 0        | 0 | 0        | 0 | 0        | 0 | 0        | 0 |
| 0.000394 | 0.000493 | 0 | 0.002466 | 0 | 0.002926 | 0 | 0.006345 | 0 |
| 3.29E-05 | 9.86E-05 | 0 | 0.000263 | 0 | 0.012328 | 0 | 0.046648 | 0 |

|          |          |   |          |   |          |          |          |   |
|----------|----------|---|----------|---|----------|----------|----------|---|
| 0        | 0        | 0 | 0.000164 | 0 | 0.000131 | 0        | 0        | 0 |
| 0        | 0        | 0 | 3.29E-05 | 0 | 0        | 3.29E-05 | 0.007693 | 0 |
| 0.000296 | 6.57E-05 | 0 | 0.001479 | 0 | 0.000263 | 0        | 0.001874 | 0 |
| 0        | 0.000164 | 0 | 0.000131 | 0 | 0.000164 | 0        | 0.000822 | 0 |
| 0.000329 | 0.000526 | 0 | 0        | 0 | 3.29E-05 | 0        | 0.00549  | 0 |
| 0        | 0        | 0 | 3.29E-05 | 0 | 0        | 0        | 0.000362 | 0 |
| 0.001052 | 3.29E-05 | 0 | 0        | 0 | 3.29E-05 | 0        | 0        | 0 |
| 0.005654 | 0.001052 | 0 | 0        | 0 | 0        | 0        | 0        | 0 |
| 0.002038 | 0        | 0 | 3.29E-05 | 0 | 0        | 0        | 0        | 0 |
| 9.86E-05 | 0.000526 | 0 | 0.002564 | 0 | 0.000822 | 0        | 0.001249 | 0 |
| 0.00023  | 0        | 0 | 0        | 0 | 0        | 0        | 0        | 0 |
| 0        | 0        | 0 | 0.00023  | 0 | 0        | 0        | 0        | 0 |
| 0.001085 | 6.57E-05 | 0 | 6.57E-05 | 0 | 0        | 0        | 6.57E-05 | 0 |
| 0.005227 | 0        | 0 | 0.000131 | 0 | 9.86E-05 | 0        | 0.00023  | 0 |
| 0        | 3.29E-05 | 0 | 9.86E-05 | 0 | 0        | 0        | 6.57E-05 | 0 |
| 0.001512 | 0.00092  | 0 | 0        | 0 | 0        | 0        | 0        | 0 |
| 0.000953 | 0.000427 | 0 | 0        | 0 | 0        | 0        | 0        | 0 |
| 0.001381 | 0        | 0 | 0        | 0 | 0        | 0        | 0        | 0 |
| 0.000131 | 0.000197 | 0 | 0        | 0 | 0        | 0        | 0        | 0 |
| 0        | 0        | 0 | 0        | 0 | 0        | 0        | 0        | 0 |
| 0.001282 | 0        | 0 | 0        | 0 | 0        | 0        | 0        | 0 |
| 9.86E-05 | 0        | 0 | 3.29E-05 | 0 | 0        | 0        | 0        | 0 |
| 0.000592 | 6.57E-05 | 0 | 0        | 0 | 0        | 0        | 0        | 0 |
| 0.000296 | 0        | 0 | 0        | 0 | 0        | 0        | 0        | 0 |
| 0.000164 | 3.29E-05 | 0 | 0.003057 | 0 | 0.000427 | 0        | 0.001446 | 0 |
| 9.86E-05 | 0        | 0 | 0.004471 | 0 | 9.86E-05 | 0        | 0.000394 | 0 |
| 9.86E-05 | 0        | 0 | 0.000197 | 0 | 0.000296 | 0        | 0.000986 | 0 |
| 0.000263 | 0        | 0 | 0.007594 | 0 | 6.57E-05 | 0        | 0.001216 | 0 |
| 0.000526 | 0.000394 | 0 | 0.004931 | 0 | 0.000855 | 0        | 6.57E-05 | 0 |
| 6.57E-05 | 0        | 0 | 0.001644 | 0 | 3.29E-05 | 0        | 0.000953 | 0 |
| 0.001381 | 0        | 0 | 0.003649 | 0 | 9.86E-05 | 0        | 0.001348 | 0 |
| 6.57E-05 | 0.00023  | 0 | 0.001742 | 0 | 0.00023  | 0        | 0.004372 | 0 |
| 0.000197 | 6.57E-05 | 0 | 0.001479 | 0 | 0.000131 | 0        | 0.000953 | 0 |
| 3.29E-05 | 0        | 0 | 0.045136 | 0 | 0.001085 | 0        | 0.006082 | 0 |
| 0        | 0        | 0 | 0.009895 | 0 | 9.86E-05 | 0        | 0.001348 | 0 |
| 0        | 0        | 0 | 3.29E-05 | 0 | 0        | 0        | 0.000362 | 0 |
| 3.29E-05 | 0        | 0 | 9.86E-05 | 0 | 6.57E-05 | 0        | 0.003386 | 0 |
| 0.000789 | 0        | 0 | 0.000296 | 0 | 0        | 0        | 0.002301 | 0 |
| 0        | 0.000427 | 0 | 0        | 0 | 0        | 0        | 0.00309  | 0 |
| 0.000362 | 0.00023  | 0 | 0        | 0 | 0        | 0        | 0.000296 | 0 |
| 6.57E-05 | 0        | 0 | 0        | 0 | 9.86E-05 | 0        | 0.003057 | 0 |
| 0.000723 | 0        | 0 | 0.007167 | 0 | 0.001479 | 0        | 0.00332  | 0 |
| 0.000855 | 0.000131 | 0 | 0.002696 | 0 | 0.000329 | 0        | 0.002235 | 0 |
| 0.000263 | 0        | 0 | 0.003846 | 0 | 0.002268 | 0        | 0.013774 | 0 |
| 0.000296 | 3.29E-05 | 0 | 0.002959 | 0 | 0.000953 | 0        | 0.002466 | 0 |
| 0.00309  | 0.000756 | 0 | 0.004635 | 0 | 9.86E-05 | 0        | 0.000526 | 0 |
| 3.29E-05 | 0        | 0 | 0.000329 | 0 | 3.29E-05 | 0        | 0.000822 | 0 |

|          |          |   |          |          |          |   |          |   |
|----------|----------|---|----------|----------|----------|---|----------|---|
| 9.86E-05 | 0        | 0 | 3.29E-05 | 0        | 0        | 0 | 0        | 0 |
| 0.001052 | 0        | 0 | 0.003452 | 0        | 0        | 0 | 0.000131 | 0 |
| 0.000164 | 0.000362 | 0 | 0.00309  | 0        | 6.57E-05 | 0 | 0.000329 | 0 |
| 0.000131 | 0        | 0 | 0.000723 | 0        | 0.000263 | 0 | 0.002071 | 0 |
| 0.000559 | 0.000427 | 0 | 0.001775 | 0        | 0.000362 | 0 | 0.012196 | 0 |
| 0.001183 | 0.000592 | 0 | 0.002531 | 0        | 3.29E-05 | 0 | 0.006115 | 0 |
| 0.000329 | 0        | 0 | 0.003978 | 0        | 0.001019 | 0 | 0.010191 | 0 |
| 0        | 0        | 0 | 0.001446 | 0        | 0.000362 | 0 | 0.002005 | 0 |
| 0        | 0        | 0 | 0.000296 | 0        | 3.29E-05 | 0 | 0.000822 | 0 |
| 0        | 0        | 0 | 0.000329 | 0        | 0.001841 | 0 | 0.013873 | 0 |
| 3.29E-05 | 3.29E-05 | 0 | 0.002104 | 0        | 0.000164 | 0 | 0.00309  | 0 |
| 6.57E-05 | 6.57E-05 | 0 | 0.000329 | 0        | 0.000855 | 0 | 0.010651 | 0 |
| 9.86E-05 | 0        | 0 | 0.001183 | 0        | 0.001644 | 0 | 0.005753 | 0 |
| 0.000855 | 0        | 0 | 0.001414 | 0        | 0        | 0 | 6.57E-05 | 0 |
| 9.86E-05 | 0        | 0 | 0.002071 | 0        | 9.86E-05 | 0 | 0        | 0 |
| 3.29E-05 | 0        | 0 | 0.002268 | 0        | 9.86E-05 | 0 | 9.86E-05 | 0 |
| 0        | 0        | 0 | 0.000296 | 0        | 3.29E-05 | 0 | 9.86E-05 | 0 |
| 0        | 6.57E-05 | 0 | 0.014465 | 0        | 3.29E-05 | 0 | 6.57E-05 | 0 |
| 0        | 0        | 0 | 0.008876 | 0        | 6.57E-05 | 0 | 6.57E-05 | 0 |
| 3.29E-05 | 0        | 0 | 0.011999 | 0        | 9.86E-05 | 0 | 0.000493 | 0 |
| 0        | 0        | 0 | 0.003287 | 0        | 9.86E-05 | 0 | 6.57E-05 | 0 |
| 0        | 0.000131 | 0 | 0.002992 | 0        | 6.57E-05 | 0 | 0.000296 | 0 |
| 0        | 6.57E-05 | 0 | 0.001775 | 0        | 0        | 0 | 9.86E-05 | 0 |
| 0.000164 | 0        | 0 | 0.006673 | 0        | 6.57E-05 | 0 | 3.29E-05 | 0 |
| 0        | 0        | 0 | 0.012131 | 0        | 3.29E-05 | 0 | 0.00046  | 0 |
| 0.001183 | 9.86E-05 | 0 | 0        | 0        | 0        | 0 | 0        | 0 |
| 3.29E-05 | 0        | 0 | 0.000131 | 0        | 6.57E-05 | 0 | 3.29E-05 | 0 |
| 0.000493 | 0.00023  | 0 | 3.29E-05 | 0        | 0        | 0 | 6.57E-05 | 0 |
| 0        | 0        | 0 | 0        | 0        | 0        | 0 | 0        | 0 |
| 3.29E-05 | 0        | 0 | 0        | 0        | 0        | 0 | 0        | 0 |
| 0.000657 | 0        | 0 | 0        | 0        | 0        | 0 | 0        | 0 |
| 6.57E-05 | 0        | 0 | 0        | 0        | 0.000164 | 0 | 0        | 0 |
| 0.000394 | 0.000131 | 0 | 0        | 0        | 0        | 0 | 0        | 0 |
| 0.001216 | 0.000164 | 0 | 0        | 0        | 0        | 0 | 0        | 0 |
| 0        | 3.29E-05 | 0 | 3.29E-05 | 0        | 0        | 0 | 0        | 0 |
| 0.000362 | 0.000164 | 0 | 0.004701 | 3.29E-05 | 0.000197 | 0 | 0.004109 | 0 |
| 9.86E-05 | 0        | 0 | 0.015221 | 0        | 0.00092  | 0 | 0.002137 | 0 |
| 3.29E-05 | 0.000592 | 0 | 0.001315 | 0        | 9.86E-05 | 0 | 0.002137 | 0 |
| 0.000131 | 0.000657 | 0 | 0.011999 | 0        | 0.000789 | 0 | 0.001972 | 0 |
| 0.000197 | 0.000263 | 0 | 0.000657 | 0        | 0.00092  | 0 | 0.002334 | 0 |
| 0.000263 | 6.57E-05 | 0 | 0.001545 | 0        | 0.001216 | 0 | 0.0048   | 0 |
| 0        | 0        | 0 | 0.000263 | 0        | 0.000296 | 0 | 0.000263 | 0 |
| 0        | 0        | 0 | 0.010585 | 0        | 0.001183 | 0 | 0        | 0 |
| 0.000164 | 0        | 0 | 0.072619 | 0        | 0.000131 | 0 | 0        | 0 |
| 3.29E-05 | 0        | 0 | 0.042375 | 0        | 9.86E-05 | 0 | 0.000592 | 0 |
| 0        | 0        | 0 | 0.005819 | 0        | 0        | 0 | 0        | 0 |
| 0        | 0        | 0 | 0.00286  | 0        | 0        | 0 | 3.29E-05 | 0 |



| k_Bacteri |
|-----------|-----------|-----------|-----------|-----------|-----------|-----------|-----------|-----------|
| 0         | 0         | 0         | 0.563825  | 0         | 0         | 0         | 0         | 0         |
| 0         | 6.57E-05  | 0         | 0.638581  | 0         | 0         | 0         | 0         | 0         |
| 0         | 0         | 0         | 0.601795  | 0         | 0         | 0         | 0         | 0         |
| 0         | 0.000197  | 0         | 0.522009  | 0         | 0         | 0         | 0         | 0         |
| 3.29E-05  | 0         | 0         | 0.574937  | 0         | 0         | 0         | 0         | 0         |
| 0         | 0         | 0         | 0.056379  | 0         | 0         | 0         | 0         | 0         |
| 0         | 0.001118  | 0         | 0.571912  | 0         | 0         | 0         | 0         | 0         |
| 6.57E-05  | 0         | 0         | 0.168875  | 0         | 0         | 0         | 0         | 0         |
| 0         | 0.000526  | 0         | 0.504816  | 0         | 0         | 0         | 9.86E-05  | 0         |
| 0         | 0.001545  | 0         | 0.324961  | 0         | 0         | 0         | 0         | 0         |
| 0         | 0.000625  | 0         | 0.039778  | 0         | 0         | 0         | 3.29E-05  | 0         |
| 0.000263  | 0.004865  | 0         | 0.065716  | 0         | 0         | 0         | 9.86E-05  | 0         |
| 0.00046   | 0.010191  | 0         | 0.529176  | 0         | 0         | 0         | 0         | 0         |
| 0.011835  | 0.016174  | 0         | 0.080739  | 0         | 9.86E-05  | 0         | 6.57E-05  | 3.29E-05  |
| 0.004833  | 0.002203  | 0         | 0.013577  | 0         | 0         | 0         | 0         | 0         |
| 9.86E-05  | 3.29E-05  | 0         | 0.017423  | 0         | 0         | 0         | 0         | 0         |
| 0.006936  | 0         | 0         | 0.135014  | 0         | 0.000559  | 0         | 0         | 0         |
| 0         | 0         | 0         | 0.001512  | 0         | 0         | 0         | 0         | 0         |
| 0.000296  | 3.29E-05  | 0         | 0.008284  | 0         | 0         | 0         | 0         | 0         |
| 0.000362  | 9.86E-05  | 0         | 0.003419  | 0         | 0         | 0         | 0         | 0         |
| 0         | 0.012328  | 0         | 0.467865  | 0         | 0         | 0         | 0.000164  | 0         |
| 3.29E-05  | 0.00194   | 0         | 0.48736   | 0         | 0         | 0         | 0         | 0         |
| 0         | 0.009698  | 0         | 0.685263  | 0         | 0         | 0         | 0         | 0         |
| 0         | 0.002367  | 0         | 0.579309  | 0         | 0         | 0         | 0         | 0         |
| 0         | 0.021039  | 0         | 0.541208  | 0         | 0         | 0         | 0         | 0         |
| 0         | 0.003156  | 0         | 0.142444  | 0         | 0         | 0         | 0         | 0         |
| 0         | 3.29E-05  | 0         | 0.690095  | 0         | 0         | 0         | 0         | 0         |
| 0         | 0.0167    | 0         | 0.436602  | 0         | 9.86E-05  | 0         | 0.000625  | 0         |
| 0         | 0.025346  | 0         | 0.302081  | 0         | 0.001151  | 0         | 0.00023   | 0         |
| 0         | 0.019725  | 0         | 0.501266  | 0         | 0.000164  | 0         | 0         | 0         |
| 0         | 0.030573  | 0         | 0.430948  | 0         | 0         | 0         | 0         | 0         |
| 3.29E-05  | 0.003353  | 0         | 0.586377  | 0         | 6.57E-05  | 0         | 3.29E-05  | 0         |
| 0         | 0.038101  | 0         | 0.443802  | 0         | 0.000526  | 0         | 0.000197  | 0         |
| 0.002729  | 0.01864   | 0         | 0.214636  | 0.000625  | 0.00641   | 0         | 0.001874  | 0         |
| 0.000362  | 0.005753  | 0         | 0.362701  | 0         | 0.000329  | 0         | 0.000197  | 0         |
| 0.002071  | 0.087018  | 0         | 0.148098  | 0         | 0.00812   | 0         | 0.001052  | 0         |
| 0.000362  | 0.024787  | 0         | 0.424636  | 0         | 0.00023   | 0         | 0.00069   | 0         |
| 0.001216  | 0.015319  | 0         | 0.366613  | 0         | 0.000329  | 0         | 0         | 0         |
| 0.0048    | 0.039449  | 0         | 0.359446  | 0.000164  | 0.002104  | 0         | 0.001151  | 0         |
| 0.002531  | 0.018574  | 0         | 0.394392  | 0         | 0.000329  | 0         | 9.86E-05  | 0         |
| 0.002959  | 0.016799  | 0         | 0.477859  | 0.000131  | 0.001216  | 0         | 0.00023   | 0         |
| 0.000526  | 0.008186  | 0         | 0.522502  | 0         | 0         | 0         | 9.86E-05  | 0         |
| 0.000197  | 0.010487  | 0         | 0.48256   | 0         | 0.000394  | 0         | 0         | 0         |
| 6.57E-05  | 0.003583  | 0         | 0.530096  | 0         | 0         | 0         | 3.29E-05  | 0         |

|          |          |   |          |          |          |   |          |   |
|----------|----------|---|----------|----------|----------|---|----------|---|
| 0        | 0.028798 | 0 | 0.457247 | 0        | 0        | 0 | 0.000362 | 0 |
| 0        | 0.023571 | 0 | 0.624774 | 0        | 0        | 0 | 0.000197 | 0 |
| 0        | 0.014103 | 0 | 0.312206 | 0        | 0        | 0 | 3.29E-05 | 0 |
| 0        | 0.031395 | 0 | 0.563168 | 0        | 0        | 0 | 0.000657 | 0 |
| 0        | 0.014695 | 0 | 0.628555 | 0        | 0        | 0 | 9.86E-05 | 0 |
| 0        | 0.001841 | 0 | 0.027779 | 0        | 0        | 0 | 0        | 0 |
| 0        | 0.001151 | 0 | 0.06062  | 0        | 0        | 0 | 0        | 0 |
| 0        | 0.003879 | 0 | 0.170091 | 0        | 0        | 0 | 0        | 0 |
| 0        | 0.015582 | 0 | 0.324205 | 0        | 0        | 0 | 3.29E-05 | 0 |
| 0        | 0.031099 | 0 | 0.607121 | 0        | 0        | 0 | 0.001742 | 0 |
| 0        | 0.004898 | 0 | 0.418028 | 0        | 0        | 0 | 0.000263 | 0 |
| 0        | 9.86E-05 | 0 | 0.672573 | 0        | 0        | 0 | 0        | 0 |
| 0        | 0.003485 | 0 | 0.734442 | 0        | 0        | 0 | 0.000362 | 0 |
| 0        | 0.001216 | 0 | 0.745521 | 0        | 0        | 0 | 0.000197 | 0 |
| 0.000296 | 0.00858  | 0 | 0.174398 | 6.57E-05 | 0.000329 | 0 | 0.000263 | 0 |
| 0        | 0.008087 | 0 | 0.366744 | 0        | 0        | 0 | 0.000625 | 0 |
| 0        | 0.003518 | 0 | 0.029291 | 0        | 6.57E-05 | 0 | 0        | 0 |
| 0        | 0        | 0 | 0.501923 | 0        | 0        | 0 | 0        | 0 |
| 0        | 0.000131 | 0 | 0.649134 | 0        | 0        | 0 | 0        | 0 |
| 0        | 9.86E-05 | 0 | 0.657089 | 0        | 3.29E-05 | 0 | 0        | 0 |
| 0        | 6.57E-05 | 0 | 0.504191 | 0        | 0.000559 | 0 | 0        | 0 |
| 0        | 0        | 0 | 0.120911 | 0        | 0        | 0 | 0        | 0 |
| 0        | 0.000131 | 0 | 0.555048 | 0        | 0        | 0 | 0        | 0 |
| 0        | 0        | 0 | 0.166705 | 0        | 0        | 0 | 0        | 0 |
| 0.002235 | 0.010783 | 0 | 0.329991 | 0        | 0        | 0 | 3.29E-05 | 0 |
| 0.000888 | 0.007824 | 0 | 0.205924 | 0        | 0        | 0 | 0        | 0 |
| 0.002104 | 0.009961 | 0 | 0.304547 | 0        | 3.29E-05 | 0 | 0        | 0 |
| 0.000131 | 0.002203 | 0 | 0.005589 | 0        | 0        | 0 | 0        | 0 |
| 0.000559 | 0.006936 | 0 | 0.205661 | 0        | 6.57E-05 | 0 | 6.57E-05 | 0 |
| 6.57E-05 | 0.002893 | 0 | 0.125448 | 0        | 0        | 0 | 0        | 0 |
| 0        | 0.001479 | 0 | 0.551662 | 0        | 0        | 0 | 0.000296 | 0 |
| 0        | 0.001019 | 0 | 0.45087  | 0        | 0        | 0 | 6.57E-05 | 0 |
| 0        | 9.86E-05 | 0 | 0.444656 | 0        | 0        | 0 | 0        | 0 |
| 0        | 0.000657 | 0 | 0.641671 | 0        | 0        | 0 | 0        | 0 |
| 0        | 0.001644 | 0 | 0.477728 | 0        | 3.29E-05 | 0 | 0.000986 | 0 |
| 0        | 0.004372 | 0 | 0.433742 | 0        | 0        | 0 | 3.29E-05 | 0 |
| 0.001282 | 0.012558 | 0 | 0.326079 | 0        | 0        | 0 | 3.29E-05 | 0 |
| 0        | 0.002597 | 0 | 0.208291 | 0        | 6.57E-05 | 0 | 0        | 0 |
| 0.000394 | 0.012295 | 0 | 0.383445 | 0        | 0        | 0 | 0        | 0 |
| 0.000723 | 0.007758 | 0 | 0.465959 | 0        | 0        | 0 | 0        | 0 |
| 0        | 0.001249 | 0 | 0.111871 | 0        | 0        | 0 | 0.000329 | 0 |
| 3.29E-05 | 0.001742 | 0 | 0.452941 | 0        | 0        | 0 | 0.000131 | 0 |
| 0        | 0.005161 | 0 | 0.601006 | 0        | 0        | 0 | 0.000592 | 0 |
| 0        | 0.003682 | 0 | 0.196423 | 0        | 0        | 0 | 0        | 0 |
| 0        | 0.002597 | 0 | 0.038824 | 0        | 0        | 0 | 0        | 0 |
| 0.000427 | 0.020546 | 0 | 0.397778 | 0        | 0        | 0 | 0        | 0 |
| 0        | 0.004076 | 0 | 0.431507 | 0        | 0        | 0 | 0.000197 | 0 |

|          |          |   |          |          |          |   |          |          |
|----------|----------|---|----------|----------|----------|---|----------|----------|
| 0        | 0.002663 | 0 | 0.493014 | 0        | 0        | 0 | 0.000526 | 0        |
| 0        | 0.019034 | 0 | 0.466912 | 0        | 0        | 0 | 0.00046  | 0        |
| 0        | 0.011506 | 0 | 0.580657 | 0        | 0        | 0 | 0.000789 | 0        |
| 0.000986 | 0.014235 | 0 | 0.439955 | 6.57E-05 | 0.000263 | 0 | 0.000789 | 0        |
| 0        | 0.003287 | 0 | 0.643348 | 0        | 0        | 0 | 0.00023  | 0        |
| 0        | 0.000394 | 0 | 0.347579 | 0        | 0        | 0 | 0        | 0        |
| 0        | 0.000131 | 0 | 0.074329 | 0        | 0        | 0 | 0        | 0        |
| 0        | 0.000164 | 0 | 0.380585 | 0        | 0        | 0 | 0        | 0        |
| 0        | 0.001512 | 0 | 0.385516 | 0        | 0        | 0 | 0        | 0        |
| 0        | 0.006049 | 0 | 0.397811 | 0        | 0        | 0 | 0        | 0        |
| 0        | 0.001446 | 0 | 0.580657 | 0        | 0        | 0 | 0        | 0        |
| 0        | 0.005621 | 0 | 0.238798 | 0        | 3.29E-05 | 0 | 0        | 0        |
| 0.00014  | 0.00014  | 0 | 0.117073 | 0        | 0        | 0 | 0        | 0        |
| 0.00023  | 0.002893 | 0 | 0.650679 | 0        | 3.29E-05 | 0 | 0        | 0        |
| 3.29E-05 | 0.001479 | 0 | 0.21286  | 0        | 0        | 0 | 0        | 0        |
| 0.000296 | 0.002597 | 0 | 0.054604 | 0        | 0        | 0 | 0        | 0        |
| 0.000789 | 0.000296 | 0 | 0.086952 | 0        | 0        | 0 | 0        | 0        |
| 0.000197 | 0.006279 | 0 | 0.329334 | 0        | 0        | 0 | 0        | 0        |
| 0        | 0.000164 | 0 | 0.051119 | 0        | 0        | 0 | 0        | 0        |
| 0        | 0.000263 | 0 | 0.051185 | 0        | 0        | 0 | 0        | 0        |
| 0        | 0.000263 | 0 | 0.756106 | 0        | 0        | 0 | 0        | 0        |
| 0.000362 | 0.011046 | 0 | 0.556757 | 0        | 0.000131 | 0 | 0.000164 | 0        |
| 6.57E-05 | 0.006246 | 0 | 0.090601 | 9.86E-05 | 6.57E-05 | 0 | 0.000131 | 0        |
| 0.000657 | 0.007397 | 0 | 0.609816 | 0        | 0.000131 | 0 | 0.000427 | 0        |
| 0.000789 | 0.005063 | 0 | 0.309478 | 0        | 0.000329 | 0 | 3.29E-05 | 0        |
| 3.29E-05 | 0.003846 | 0 | 0.450541 | 0        | 0.000263 | 0 | 0.000625 | 0        |
| 9.86E-05 | 0.002564 | 0 | 0.162136 | 0        | 6.57E-05 | 0 | 0        | 0        |
| 0.000131 | 0.078536 | 0 | 0.364476 | 0        | 0.000131 | 0 | 6.57E-05 | 0        |
| 0        | 0.000296 | 0 | 0.027253 | 0        | 0        | 0 | 0        | 0        |
| 0        | 0.001611 | 0 | 0.090733 | 0        | 0        | 0 | 9.86E-05 | 0        |
| 0        | 0.000559 | 0 | 0.073638 | 0        | 0        | 0 | 0        | 0        |
| 0.000329 | 0.005621 | 0 | 0.51047  | 6.57E-05 | 0.000526 | 0 | 0.000625 | 0        |
| 0.001348 | 0.001052 | 0 | 0.370656 | 0        | 0        | 0 | 0        | 0        |
| 0.00092  | 0.008646 | 0 | 0.440481 | 0        | 3.29E-05 | 0 | 0        | 0        |
| 0.018442 | 0.060226 | 0 | 0.374897 | 0        | 0.00023  | 0 | 0.00046  | 0        |
| 0.007725 | 0.043295 | 0 | 0.345705 | 0        | 9.86E-05 | 0 | 0.000164 | 0        |
| 0.026661 | 0.049246 | 0 | 0.286597 | 0        | 6.57E-05 | 0 | 9.86E-05 | 0        |
| 0.000723 | 0.019757 | 0 | 0.100858 | 0        | 0.000164 | 0 | 0        | 0        |
| 0.00069  | 0.019166 | 0 | 0.47993  | 0        | 0.000164 | 0 | 0.000296 | 0        |
| 0.001446 | 0.017555 | 0 | 0.379302 | 0        | 0.000131 | 0 | 0.000164 | 0        |
| 0.010322 | 0.073803 | 0 | 0.132351 | 0        | 0.001808 | 0 | 0.00023  | 0.000493 |
| 0.003583 | 0.032513 | 0 | 0.251422 | 0        | 0.000296 | 0 | 0.000822 | 0.000131 |
| 0.000493 | 0.009106 | 0 | 0.026299 | 9.86E-05 | 9.86E-05 | 0 | 3.29E-05 | 3.29E-05 |
| 0.000789 | 0.014333 | 0 | 0.663368 | 0        | 0.00023  | 0 | 9.86E-05 | 0        |
| 0.000559 | 0.032315 | 0 | 0.508366 | 0        | 0        | 0 | 0.000131 | 0        |
| 0.000559 | 0.014793 | 0 | 0.602518 | 0        | 0.000362 | 0 | 0.000263 | 0        |
| 0.000888 | 0.010355 | 0 | 0.389033 | 0        | 0.00069  | 0 | 9.86E-05 | 0        |

|          |          |   |          |          |          |   |          |          |
|----------|----------|---|----------|----------|----------|---|----------|----------|
| 0.001808 | 0.024064 | 0 | 0.612643 | 0        | 9.86E-05 | 0 | 0.000131 | 0        |
| 0.000296 | 0.005095 | 0 | 0.369309 | 0        | 3.29E-05 | 0 | 3.29E-05 | 0        |
| 0.000164 | 0.00332  | 0 | 0.34965  | 0        | 0.000296 | 0 | 0.00023  | 0        |
| 0.000164 | 0.00457  | 0 | 0.235741 | 0        | 0        | 0 | 0.00023  | 0        |
| 0.000263 | 0.012657 | 0 | 0.114008 | 0        | 0        | 0 | 3.29E-05 | 0        |
| 0        | 0        | 0 | 0.388935 | 0        | 0        | 0 | 0        | 0        |
| 0        | 0.000164 | 0 | 0.398534 | 0        | 0        | 0 | 0        | 0        |
| 0        | 9.86E-05 | 0 | 0.290509 | 0        | 3.29E-05 | 0 | 0        | 0        |
| 0        | 0        | 0 | 0.751898 | 0        | 0        | 0 | 0        | 0        |
| 0        | 0        | 0 | 0.628686 | 0        | 0        | 0 | 0        | 0        |
| 0        | 0        | 0 | 0.738913 | 0        | 0        | 0 | 0        | 0        |
| 0        | 6.57E-05 | 0 | 0.518886 | 0        | 0        | 0 | 0        | 0        |
| 0        | 9.86E-05 | 0 | 0.605543 | 0        | 0        | 0 | 0        | 0        |
| 0        | 3.29E-05 | 0 | 0.674611 | 0        | 0        | 0 | 0        | 0        |
| 0        | 0        | 0 | 0.653243 | 0        | 0        | 0 | 0        | 0        |
| 0        | 9.86E-05 | 0 | 0.845754 | 0        | 0        | 0 | 0        | 0        |
| 0        | 6.57E-05 | 0 | 0.493737 | 0        | 0        | 0 | 0        | 0        |
| 0        | 0        | 0 | 0.429337 | 0        | 0        | 0 | 0        | 0        |
| 0        | 3.29E-05 | 0 | 0.772478 | 0        | 0.00023  | 0 | 0        | 0        |
| 0        | 0.00092  | 0 | 0.642526 | 0        | 0        | 0 | 0        | 0        |
| 0        | 0        | 0 | 0.510569 | 0        | 0.000888 | 0 | 0        | 0        |
| 0        | 0        | 0 | 0.509155 | 0        | 0.000263 | 0 | 0        | 0        |
| 0.001249 | 0.013511 | 0 | 0.0883   | 6.57E-05 | 0.001052 | 0 | 0.000329 | 0        |
| 0.000296 | 0.009797 | 0 | 0.207765 | 0        | 0.000131 | 0 | 0.000263 | 0        |
| 0.009106 | 0.088859 | 0 | 0.182386 | 0        | 0.000427 | 0 | 9.86E-05 | 0        |
| 0        | 0.008054 | 0 | 0.112002 | 0        | 0.000131 | 0 | 0        | 0        |
| 0.000197 | 0.011309 | 0 | 0.216444 | 0        | 0.000131 | 0 | 0        | 0        |
| 0.000164 | 0.013051 | 0 | 0.479865 | 0        | 0        | 0 | 0        | 0        |
| 0.000789 | 0.014892 | 0 | 0.525856 | 0        | 9.86E-05 | 0 | 0.000164 | 0        |
| 0.001118 | 0.008416 | 0 | 0.255498 | 0        | 0        | 0 | 0        | 0        |
| 3.29E-05 | 0.008153 | 0 | 0.448141 | 0        | 0        | 0 | 0        | 0        |
| 3.29E-05 | 0.012755 | 0 | 0.400145 | 0        | 0        | 0 | 0.000197 | 0        |
| 0.002203 | 0.043788 | 0 | 0.24511  | 0        | 0.000296 | 0 | 0        | 0        |
| 0.00309  | 0.018705 | 0 | 0.365594 | 0        | 0.002301 | 0 | 0.001151 | 0.00069  |
| 0.000362 | 0.010257 | 0 | 0.431375 | 0        | 0        | 0 | 0        | 0        |
| 6.57E-05 | 0.015221 | 0 | 0.293336 | 0        | 0.000164 | 0 | 0        | 0        |
| 0.000329 | 0.005161 | 0 | 0.499458 | 0        | 0        | 0 | 0        | 0        |
| 0.000723 | 0.028601 | 0 | 0.502383 | 0        | 0.000164 | 0 | 0.000164 | 0        |
| 0.000197 | 0.024195 | 0 | 0.531707 | 0        | 0        | 0 | 0        | 0        |
| 0.000131 | 0.011605 | 0 | 0.578093 | 0        | 0        | 0 | 6.57E-05 | 0        |
| 0        | 0.035406 | 0 | 0.420855 | 0        | 0        | 0 | 0.00046  | 3.29E-05 |
| 0.000164 | 0.024689 | 0 | 0.484533 | 0        | 6.57E-05 | 0 | 6.57E-05 | 0        |
| 0        | 0.030146 | 0 | 0.304875 | 0        | 0        | 0 | 0.000723 | 0        |
| 6.57E-05 | 0.031789 | 0 | 0.439101 | 0        | 0        | 0 | 0.00023  | 0        |
| 3.29E-05 | 0.018968 | 0 | 0.343174 | 0        | 0        | 0 | 0.000131 | 0        |
| 0        | 3.29E-05 | 0 | 0.01361  | 0        | 0        | 0 | 6.57E-05 | 0        |
| 3.29E-05 | 0.000197 | 0 | 0.021763 | 0        | 0        | 0 | 0        | 0        |



|          |          |   |          |          |          |   |          |          |
|----------|----------|---|----------|----------|----------|---|----------|----------|
| 0        | 0        | 0 | 0.00881  | 0        | 3.29E-05 | 0 | 0        | 0        |
| 0        | 0        | 0 | 0.003255 | 0        | 0        | 0 | 0        | 0        |
| 6.57E-05 | 0.000592 | 0 | 0.268253 | 0        | 6.57E-05 | 0 | 0.00069  | 0        |
| 0        | 0.000131 | 0 | 0.008712 | 0        | 0        | 0 | 0        | 0        |
| 6.57E-05 | 0        | 0 | 0.009435 | 0        | 0        | 0 | 0        | 0        |
| 0        | 0.023637 | 0 | 0.60906  | 0        | 0        | 0 | 0        | 0        |
| 0        | 0.00355  | 0 | 0.491009 | 0        | 0        | 0 | 0        | 0        |
| 0        | 0.001381 | 0 | 0.556659 | 0        | 0        | 0 | 0        | 0        |
| 0        | 0.010388 | 0 | 0.700385 | 0        | 0        | 0 | 0        | 0        |
| 0        | 0.015615 | 0 | 0.439133 | 0        | 0        | 0 | 0        | 0        |
| 0        | 0.006608 | 0 | 0.632598 | 0        | 0        | 0 | 0        | 0        |
| 0.000164 | 0.022585 | 0 | 0.295046 | 0        | 6.57E-05 | 0 | 9.86E-05 | 0        |
| 0.000164 | 0.008449 | 0 | 0.086328 | 3.29E-05 | 0        | 0 | 3.29E-05 | 0        |
| 0.001545 | 0.023637 | 0 | 0.465334 | 0        | 0.000855 | 0 | 0.000362 | 3.29E-05 |
| 0.002597 | 0.026135 | 0 | 0.350143 | 0.000131 | 0.001479 | 0 | 0.000427 | 0        |
| 0        | 3.29E-05 | 0 | 0.241724 | 0        | 6.57E-05 | 0 | 0        | 0        |
| 0        | 9.86E-05 | 0 | 0.354055 | 0        | 0        | 0 | 0        | 0        |
| 0        | 0.000197 | 0 | 0.389987 | 0        | 0        | 0 | 0        | 0        |
| 0        | 9.86E-05 | 0 | 0.34771  | 0        | 0        | 0 | 0        | 0        |
| 0        | 3.29E-05 | 0 | 0.233473 | 0        | 3.29E-05 | 0 | 0        | 0        |
| 0        | 0        | 0 | 0.498767 | 0        | 0        | 0 | 0        | 0        |
| 0        | 0.00069  | 0 | 0.239784 | 0        | 3.29E-05 | 0 | 0        | 0        |
| 3.29E-05 | 0.001742 | 0 | 0.026168 | 0        | 0        | 0 | 0        | 0        |
| 0        | 0.001085 | 0 | 0.029127 | 0        | 3.29E-05 | 0 | 0        | 0        |
| 0        | 0.00309  | 0 | 0.198626 | 0        | 6.57E-05 | 0 | 0        | 0        |
| 0.00023  | 0.014695 | 0 | 0.42102  | 0        | 0        | 0 | 0        | 0        |
| 0        | 0.016733 | 0 | 0.436602 | 0        | 0        | 0 | 0.000789 | 0        |
| 0.001052 | 0.013643 | 0 | 0.4344   | 0        | 0.000427 | 0 | 0        | 0        |
| 0.001151 | 0.03912  | 0 | 0.598639 | 3.29E-05 | 0        | 0 | 0.000164 | 0        |
| 0.00023  | 0.020579 | 0 | 0.351359 | 0        | 6.57E-05 | 0 | 6.57E-05 | 0        |
| 0.000362 | 0.017982 | 0 | 0.360104 | 0        | 0        | 0 | 0        | 0        |
| 0        | 3.29E-05 | 0 | 0.04987  | 0        | 0        | 0 | 0        | 0        |
| 3.29E-05 | 0        | 0 | 0.047405 | 0        | 0        | 0 | 0        | 0        |
| 0        | 0.001249 | 0 | 0.315888 | 0        | 0        | 0 | 0        | 0        |
| 0        | 0.006641 | 0 | 0.455143 | 0        | 0.000394 | 0 | 0.000559 | 0        |
| 0        | 0.001644 | 0 | 0.267497 | 0        | 0        | 0 | 0.000329 | 0        |
| 0        | 0.063381 | 0 | 0.416582 | 0        | 0        | 0 | 9.86E-05 | 0        |
| 0        | 0.001775 | 0 | 0.44298  | 0        | 9.86E-05 | 0 | 9.86E-05 | 0        |
| 0.000855 | 0.011342 | 0 | 0.354548 | 0        | 0.000362 | 0 | 9.86E-05 | 0        |
| 0        | 0.002959 | 0 | 0.563529 | 0        | 0.000197 | 0 | 0.000263 | 0        |
| 0.000263 | 0.014366 | 0 | 0.532759 | 3.29E-05 | 0.000394 | 0 | 0        | 0        |
| 0.00766  | 0.075216 | 0 | 0.048194 | 0.000493 | 0.003978 | 0 | 0.000394 | 0        |
| 0.001249 | 0.022453 | 0 | 0.367106 | 9.86E-05 | 0.000822 | 0 | 0.000657 | 0        |
| 0.000625 | 0.02814  | 0 | 0.370755 | 0        | 0.00046  | 0 | 0.000427 | 0        |
| 0.001907 | 0.036129 | 0 | 0.365462 | 9.86E-05 | 0.00023  | 0 | 0.000263 | 0        |
| 0.001381 | 0.027088 | 0 | 0.457148 | 0.000131 | 0.000197 | 0 | 0        | 0        |
| 0.001874 | 0.014267 | 0 | 0.309346 | 6.57E-05 | 0.001085 | 0 | 0.000427 | 0        |

|          |          |   |          |          |          |   |          |   |
|----------|----------|---|----------|----------|----------|---|----------|---|
| 0.000197 | 0.006213 | 0 | 0.415431 | 0        | 6.57E-05 | 0 | 0.000362 | 0 |
| 0.00092  | 0.01075  | 0 | 0.282652 | 0        | 0        | 0 | 0        | 0 |
| 0.00023  | 0.005063 | 0 | 0.29281  | 0        | 3.29E-05 | 0 | 0        | 0 |
| 0        | 0.000164 | 0 | 0.010322 | 0        | 0        | 0 | 0        | 0 |
| 0        | 0        | 0 | 0.620106 | 0        | 0        | 0 | 0        | 0 |
| 0        | 0.001578 | 0 | 0.533219 | 0        | 0        | 0 | 0        | 0 |
| 0.005654 | 0.0215   | 0 | 0.364213 | 0        | 0        | 0 | 0        | 0 |
| 0        | 0        | 0 | 0.79286  | 0        | 0        | 0 | 0        | 0 |
| 0        | 0.000263 | 0 | 0.483809 | 0        | 0        | 0 | 0        | 0 |
| 0.000329 | 0.010322 | 0 | 0.376409 | 0        | 3.29E-05 | 0 | 0.000723 | 0 |
| 0        | 0        | 0 | 0.660903 | 0        | 0        | 0 | 0        | 0 |
| 0.000986 | 0.042835 | 0 | 0.231336 | 0        | 0        | 0 | 0        | 0 |
| 0        | 0.000394 | 0 | 0.717479 | 0        | 0        | 0 | 0        | 0 |
| 3.29E-05 | 0.00286  | 0 | 0.191722 | 0        | 0        | 0 | 0        | 0 |
| 0.00092  | 0.099477 | 0 | 0.294093 | 0        | 9.86E-05 | 0 | 0        | 0 |
| 0.000427 | 0.062001 | 0 | 0.347119 | 0        | 3.29E-05 | 0 | 0        | 0 |
| 9.86E-05 | 0.059305 | 0 | 0.214668 | 0        | 0        | 0 | 0        | 0 |
| 0.001052 | 0.037772 | 0 | 0.178014 | 0        | 6.57E-05 | 0 | 3.29E-05 | 0 |
| 0.000526 | 0.047437 | 0 | 0.303264 | 0        | 0.000329 | 0 | 0        | 0 |
| 0.001348 | 0.044775 | 0 | 0.34919  | 0        | 9.86E-05 | 0 | 0        | 0 |
| 0.000723 | 0.039515 | 0 | 0.385318 | 0        | 0.000164 | 0 | 3.29E-05 | 0 |
| 0.000559 | 0.019889 | 0 | 0.247313 | 0        | 0        | 0 | 0        | 0 |
| 6.57E-05 | 0.031    | 0 | 0.105888 | 0        | 0        | 0 | 0        | 0 |
| 0        | 0.050725 | 0 | 0.637135 | 0        | 3.29E-05 | 0 | 0        | 0 |
| 0        | 0.000131 | 0 | 0.06966  | 0        | 0        | 0 | 0        | 0 |
| 0        | 0.000526 | 0 | 0.03248  | 0        | 0        | 0 | 0        | 0 |
| 0        | 6.57E-05 | 0 | 0.01864  | 0        | 0        | 0 | 0        | 0 |
| 0        | 0.000493 | 0 | 0.067951 | 0        | 0        | 0 | 0        | 0 |
| 0        | 0.000723 | 0 | 0.361879 | 0        | 0        | 0 | 0        | 0 |
| 0        | 0.000131 | 0 | 0.025017 | 0        | 0        | 0 | 0        | 0 |
| 0        | 6.57E-05 | 0 | 0.101318 | 0        | 0        | 0 | 0        | 0 |
| 0        | 3.29E-05 | 0 | 0.125152 | 0        | 0        | 0 | 0        | 0 |
| 0.000822 | 0.026266 | 0 | 0.131267 | 0        | 6.57E-05 | 0 | 0        | 0 |
| 0.00217  | 0.001479 | 0 | 0.714751 | 0        | 0        | 0 | 0        | 0 |
| 0.000131 | 0.008317 | 0 | 0.289391 | 0        | 0.000164 | 0 | 0        | 0 |
| 0.000296 | 0.025839 | 0 | 0.465268 | 0        | 0.000131 | 0 | 0        | 0 |
| 0        | 0.039811 | 0 | 0.456655 | 0        | 0        | 0 | 6.57E-05 | 0 |
| 0.000329 | 0.014958 | 0 | 0.701568 | 0        | 3.29E-05 | 0 | 0        | 0 |
| 0.002005 | 0.013117 | 0 | 0.339656 | 0        | 0        | 0 | 0        | 0 |
| 0.002663 | 0.041191 | 0 | 0.51024  | 0        | 0        | 0 | 0        | 0 |
| 9.86E-05 | 0.017029 | 0 | 0.425096 | 0        | 0        | 0 | 0.000197 | 0 |
| 0        | 0.027812 | 0 | 0.636806 | 0        | 0        | 0 | 3.29E-05 | 0 |
| 3.29E-05 | 0.013314 | 0 | 0.404813 | 0        | 6.57E-05 | 0 | 0        | 0 |
| 0.000427 | 0.003255 | 0 | 0.048621 | 0        | 0.000296 | 0 | 9.86E-05 | 0 |
| 0.000888 | 0.006378 | 0 | 0.054867 | 0        | 0.000131 | 0 | 6.57E-05 | 0 |
| 0.001085 | 0.004044 | 0 | 0.09001  | 0.000131 | 0.000559 | 0 | 0.000329 | 0 |
| 0.000296 | 0.002498 | 0 | 0.017719 | 0        | 0.000164 | 0 | 9.86E-05 | 0 |

|          |          |          |          |          |          |   |          |          |
|----------|----------|----------|----------|----------|----------|---|----------|----------|
| 0.000657 | 0.020711 | 0        | 0.26638  | 9.86E-05 | 0.001052 | 0 | 0.001348 | 0        |
| 0.000986 | 0.026891 | 0        | 0.254972 | 0        | 0.000723 | 0 | 0.000263 | 0        |
| 0.000822 | 0.013643 | 0        | 0.274795 | 6.57E-05 | 0.000329 | 0 | 0        | 0        |
| 0        | 0.005654 | 0        | 0.353365 | 0        | 0        | 0 | 0.000592 | 0        |
| 0        | 0.028568 | 0        | 0.615109 | 0        | 0.000164 | 0 | 6.57E-05 | 0        |
| 9.86E-05 | 0.004438 | 0        | 0.532562 | 0        | 0.000197 | 0 | 3.29E-05 | 0        |
| 0.007068 | 0.032874 | 0.000131 | 0.297972 | 0.000197 | 0.001841 | 0 | 0.00046  | 0.000131 |
| 0.004602 | 0.025215 | 0        | 0.34199  | 6.57E-05 | 0.00092  | 0 | 0.00069  | 0.000131 |
| 0.015286 | 0.036523 | 0        | 0.319439 | 0.000164 | 0.004833 | 0 | 0.001775 | 0.000131 |
| 0.006739 | 0.016667 | 0        | 0.435813 | 9.86E-05 | 0.001118 | 0 | 0.000394 | 6.57E-05 |
| 0.003057 | 0.007956 | 0        | 0.109898 | 9.86E-05 | 0.000197 | 0 | 6.57E-05 | 0        |
| 0.012821 | 0.043821 | 0        | 0.3986   | 0        | 0.00092  | 0 | 6.57E-05 | 0.000131 |
| 0.005819 | 0.018212 | 0        | 0.204477 | 0.000197 | 0.00332  | 0 | 0.001446 | 0        |
| 0.005128 | 0.006213 | 0        | 0.400079 | 0.000164 | 0.003222 | 0 | 0.000657 | 0        |
| 3.29E-05 | 3.29E-05 | 0        | 0.127848 | 0        | 0        | 0 | 9.86E-05 | 0        |
| 3.29E-05 | 3.29E-05 | 0        | 0.267432 | 0        | 0        | 0 | 0.000362 | 0        |
| 0        | 3.29E-05 | 0        | 0.025379 | 0        | 6.57E-05 | 0 | 0        | 0        |
| 6.57E-05 | 0.001348 | 0        | 0.090075 | 0        | 0        | 0 | 0        | 0        |
| 0        | 0.000197 | 0        | 0.069397 | 0        | 0        | 0 | 0        | 0        |
| 0        | 0.000164 | 0        | 0.050561 | 0        | 0        | 0 | 0        | 0        |
| 0        | 9.86E-05 | 0        | 0.027614 | 0        | 0        | 0 | 0        | 0        |
| 0        | 0.000329 | 0        | 0.072816 | 0        | 0        | 0 | 3.29E-05 | 0        |
| 0        | 0.001446 | 0        | 0.237023 | 0        | 0        | 0 | 0        | 0        |
| 0        | 0        | 0        | 0.098787 | 0        | 0        | 0 | 0        | 0        |
| 0        | 0.000131 | 0        | 0.004011 | 0        | 0        | 0 | 0        | 0        |
| 0        | 0        | 0        | 0.004931 | 0        | 0        | 0 | 0        | 0        |
| 0.00023  | 0        | 0        | 0.014235 | 0        | 0        | 0 | 0        | 0        |
| 0        | 0        | 0        | 0.079654 | 0        | 0        | 0 | 0        | 0        |
| 0.000362 | 0.00618  | 0        | 0.107071 | 0        | 0        | 0 | 9.86E-05 | 0        |
| 9.86E-05 | 0.002663 | 0        | 0.050528 | 0        | 6.57E-05 | 0 | 0        | 0        |
| 0        | 0.000756 | 0        | 0.048588 | 0        | 0        | 0 | 0        | 0        |
| 0.000164 | 0.001578 | 0        | 0.26638  | 0        | 0        | 0 | 0        | 0        |
| 0        | 0.002334 | 0        | 0.303363 | 0        | 3.29E-05 | 0 | 0.000362 | 0        |
| 9.86E-05 | 0.029883 | 0        | 0.278444 | 0        | 0.000427 | 0 | 0.000559 | 0        |
| 3.29E-05 | 0.017325 | 0        | 0.109635 | 0        | 0        | 0 | 6.57E-05 | 0        |
| 0        | 0.00526  | 0        | 0.064105 | 0        | 0        | 0 | 0        | 0        |
| 0        | 0.17854  | 0        | 0.250962 | 0        | 0        | 0 | 0.000329 | 0        |
| 3.29E-05 | 0.005621 | 0        | 0.057727 | 0        | 0        | 0 | 0        | 0        |
| 0        | 0.069167 | 0        | 0.296854 | 0        | 0        | 0 | 3.29E-05 | 0        |
| 0        | 0.012394 | 0        | 0.382425 | 0        | 0        | 0 | 0        | 0        |
| 0        | 0.01384  | 0        | 0.295605 | 0        | 0        | 0 | 0        | 0        |
| 0.000164 | 0.004307 | 0        | 0.544561 | 0        | 0        | 0 | 0        | 0        |
| 3.29E-05 | 0.004537 | 0        | 0.207765 | 0        | 0        | 0 | 0        | 0        |
| 0.000362 | 0.008712 | 0        | 0.282587 | 0        | 0        | 0 | 0        | 0        |
| 0.001446 | 0.042572 | 0        | 0.447483 | 0        | 0.004339 | 0 | 0        | 0        |
| 0        | 0.014761 | 0        | 0.435057 | 0        | 0        | 0 | 0.00023  | 0        |
| 0.000723 | 0.068345 | 0        | 0.343864 | 0        | 0        | 0 | 3.29E-05 | 0        |

|          |          |   |          |          |          |   |          |   |
|----------|----------|---|----------|----------|----------|---|----------|---|
| 9.86E-05 | 0.037575 | 0 | 0.520464 | 0        | 9.86E-05 | 0 | 9.86E-05 | 0 |
| 0.000164 | 0.014728 | 0 | 0.412867 | 0        | 0.00023  | 0 | 0.000592 | 0 |
| 0.000855 | 0.006246 | 0 | 0.635918 | 0        | 0.000263 | 0 | 3.29E-05 | 0 |
| 0        | 0.010158 | 0 | 0.497189 | 0        | 0        | 0 | 6.57E-05 | 0 |
| 0        | 0.006936 | 0 | 0.490943 | 0        | 0        | 0 | 0.000263 | 0 |
| 0        | 0.01361  | 0 | 0.374108 | 0        | 0        | 0 | 9.86E-05 | 0 |
| 0        | 0.008712 | 0 | 0.475065 | 0        | 0        | 0 | 0.000296 | 0 |
| 6.57E-05 | 0.009501 | 0 | 0.652257 | 0        | 0        | 0 | 0        | 0 |
| 6.57E-05 | 0.015155 | 0 | 0.512542 | 0        | 0        | 0 | 0.000131 | 0 |
| 9.86E-05 | 0.016733 | 0 | 0.470758 | 0        | 0        | 0 | 0.000329 | 0 |
| 9.86E-05 | 0.009764 | 0 | 0.383576 | 0        | 0        | 0 | 0.000164 | 0 |
| 0        | 0.000888 | 0 | 0.031921 | 0        | 0        | 0 | 0        | 0 |
| 0.000197 | 0.024557 | 0 | 0.513199 | 0        | 0        | 0 | 0        | 0 |
| 0.000131 | 0.006838 | 0 | 0.315165 | 0        | 0        | 0 | 0.000197 | 0 |
| 0        | 0.01453  | 0 | 0.451428 | 0        | 0        | 0 | 0        | 0 |
| 0.000263 | 0.00309  | 0 | 0.108222 | 0        | 3.29E-05 | 0 | 6.57E-05 | 0 |
| 0        | 0.002235 | 0 | 0.626648 | 0        | 0        | 0 | 0        | 0 |
| 0        | 0.001709 | 0 | 0.641638 | 0        | 0        | 0 | 0.000131 | 0 |
| 0        | 0.00023  | 0 | 0.636017 | 0        | 3.29E-05 | 0 | 0        | 0 |
| 0        | 0.000263 | 0 | 0.115323 | 0        | 9.86E-05 | 0 | 0        | 0 |
| 0.002466 | 0.029324 | 0 | 0.098129 | 0        | 0        | 0 | 0        | 0 |
| 0.003189 | 0.020382 | 0 | 0.455636 | 0        | 9.86E-05 | 0 | 3.29E-05 | 0 |
| 0.001841 | 0.023571 | 0 | 0.244124 | 0        | 0.000131 | 0 | 3.29E-05 | 0 |
| 0.00023  | 0.00618  | 0 | 0.352576 | 0        | 3.29E-05 | 0 | 3.29E-05 | 0 |
| 0.000394 | 0.004142 | 0 | 0.252244 | 0        | 0        | 0 | 6.57E-05 | 0 |
| 0.000329 | 0.00332  | 0 | 0.228443 | 0        | 0.000131 | 0 | 0        | 0 |
| 0.002498 | 0.023834 | 0 | 0.269207 | 0        | 0.000263 | 0 | 0.000164 | 0 |
| 0.001907 | 0.040008 | 0 | 0.575233 | 0        | 0.000493 | 0 | 0.000263 | 0 |
| 0        | 0.033302 | 0 | 0.587988 | 0        | 3.29E-05 | 0 | 0        | 0 |
| 0.00263  | 0.023965 | 0 | 0.472271 | 3.29E-05 | 0.00069  | 0 | 0.000197 | 0 |
| 0.000723 | 0.030507 | 0 | 0.632138 | 0.000427 | 0.00069  | 0 | 0.000329 | 0 |
| 0        | 0.037345 | 0 | 0.38282  | 0        | 3.29E-05 | 0 | 0        | 0 |
| 0        | 0.020579 | 0 | 0.46632  | 0        | 0        | 0 | 0        | 0 |
| 0.000131 | 0.000559 | 0 | 0.812781 | 0        | 9.86E-05 | 0 | 0.000131 | 0 |
| 0        | 0        | 0 | 0.760347 | 0        | 0        | 0 | 0        | 0 |
| 0.001282 | 0.007758 | 0 | 0.674743 | 0.000362 | 0        | 0 | 0        | 0 |
| 0        | 0.012196 | 0 | 0.41576  | 0        | 0        | 0 | 0        | 0 |
| 0.003123 | 0.007725 | 0 | 0.407278 | 0        | 0        | 0 | 0        | 0 |
| 0        | 0.008646 | 0 | 0.402544 | 0        | 0.000394 | 0 | 0        | 0 |
| 0        | 0.00309  | 0 | 0.132286 | 0        | 0        | 0 | 3.29E-05 | 0 |
| 0        | 3.29E-05 | 0 | 0.617542 | 0        | 3.29E-05 | 0 | 0        | 0 |
| 0        | 3.29E-05 | 0 | 0.191328 | 0        | 0        | 0 | 0        | 0 |
| 0.000197 | 0.010553 | 0 | 0.365791 | 0        | 0        | 0 | 0        | 0 |
| 0.000855 | 0.015188 | 0 | 0.330287 | 0        | 0        | 0 | 0        | 0 |
| 0.002794 | 0.018114 | 0 | 0.511194 | 0        | 0.00023  | 0 | 3.29E-05 | 0 |
| 3.29E-05 | 0.000164 | 0 | 0.142115 | 0        | 3.29E-05 | 0 | 0        | 0 |
| 0        | 0.00069  | 0 | 0.174759 | 0        | 0        | 0 | 0        | 0 |

|          |          |   |          |          |          |   |          |          |
|----------|----------|---|----------|----------|----------|---|----------|----------|
| 0        | 9.86E-05 | 0 | 0.020119 | 0        | 0        | 0 | 0        | 0        |
| 0.000164 | 0.014695 | 0 | 0.360071 | 0        | 0        | 0 | 0        | 0        |
| 0        | 0.000263 | 0 | 0.071994 | 0        | 0        | 0 | 0        | 0        |
| 0.000822 | 0.003649 | 0 | 0.030474 | 0        | 0        | 0 | 0        | 0        |
| 0        | 0.000427 | 0 | 0.143299 | 0        | 0        | 0 | 0        | 0        |
| 0        | 0        | 0 | 0.00194  | 0        | 0        | 0 | 0        | 0        |
| 0        | 0.000197 | 0 | 0.015681 | 0        | 0        | 0 | 0        | 0        |
| 0        | 0        | 0 | 0.000493 | 0        | 0        | 0 | 0        | 0        |
| 0        | 0.000131 | 0 | 0.009665 | 0        | 0        | 0 | 0        | 0        |
| 0        | 3.29E-05 | 0 | 0.068378 | 0        | 0        | 0 | 0        | 0        |
| 0        | 3.29E-05 | 0 | 0.052303 | 0        | 0        | 0 | 0        | 0        |
| 0        | 0        | 0 | 0.056905 | 0        | 0        | 0 | 0        | 0        |
| 0        | 3.29E-05 | 0 | 0.03672  | 0        | 0        | 0 | 0        | 0        |
| 0        | 0        | 0 | 0.010092 | 0        | 0        | 0 | 0        | 0        |
| 0        | 0.000263 | 0 | 0.252244 | 0        | 0        | 0 | 0        | 0        |
| 0        | 9.86E-05 | 0 | 0.011177 | 0        | 0        | 0 | 0        | 0        |
| 0        | 0.000131 | 0 | 0.022124 | 0        | 0        | 0 | 0        | 0        |
| 0.0024   | 0.045169 | 0 | 0.356093 | 0        | 0        | 0 | 0.000493 | 0        |
| 0.000263 | 0.018081 | 0 | 0.407771 | 0        | 0        | 0 | 0        | 0        |
| 0.00046  | 0.008942 | 0 | 0.56159  | 0        | 0        | 0 | 0        | 0        |
| 0.001118 | 0.020974 | 0 | 0.328084 | 0        | 0        | 0 | 0        | 0        |
| 0.000131 | 0.003386 | 0 | 0.203951 | 0        | 0        | 0 | 3.29E-05 | 0        |
| 0.000296 | 0.034091 | 0 | 0.395707 | 0        | 0        | 0 | 0        | 0        |
| 0.000657 | 0.0191   | 0 | 0.327493 | 0        | 0        | 0 | 0        | 0        |
| 0.001216 | 0.026365 | 0 | 0.09402  | 0        | 0        | 0 | 0        | 0        |
| 0.000789 | 0.009797 | 0 | 0.236333 | 0        | 0        | 0 | 0        | 0        |
| 0.000263 | 0.007331 | 0 | 0.313686 | 0        | 3.29E-05 | 0 | 3.29E-05 | 0        |
| 0.001677 | 0.026727 | 0 | 0.495085 | 0        | 0.00046  | 0 | 0.00023  | 0        |
| 0.002235 | 0.012722 | 0 | 0.242447 | 3.29E-05 | 3.29E-05 | 0 | 3.29E-05 | 0        |
| 0        | 0.008251 | 0 | 0.356192 | 0        | 6.57E-05 | 0 | 0.000756 | 0        |
| 0.000986 | 0.010388 | 0 | 0.496598 | 3.29E-05 | 0.000427 | 0 | 0.001808 | 0        |
| 9.86E-05 | 0.003419 | 0 | 0.137809 | 0        | 3.29E-05 | 0 | 3.29E-05 | 0        |
| 0.001381 | 0.036425 | 0 | 0.376541 | 0        | 0.000394 | 0 | 0.000526 | 0        |
| 0.00046  | 0.00812  | 0 | 0.038561 | 0        | 0.000131 | 0 | 0        | 0        |
| 0.001808 | 0.020579 | 0 | 0.433479 | 0        | 0.000131 | 0 | 0.000131 | 0        |
| 0.000263 | 0.005687 | 0 | 0.395049 | 0        | 0        | 0 | 0        | 0        |
| 0.00069  | 0.009928 | 0 | 0.633256 | 0        | 0.000625 | 0 | 0.00046  | 0        |
| 0.003682 | 0.049344 | 0 | 0.241494 | 3.29E-05 | 0.000329 | 0 | 0.000723 | 0.000329 |
| 0.000131 | 0.007199 | 0 | 0.078175 | 0        | 0        | 0 | 0        | 6.57E-05 |
| 0.004471 | 0.046254 | 0 | 0.219041 | 0        | 0.000197 | 0 | 0.000493 | 0.00023  |
| 0.001874 | 0.028995 | 0 | 0.320786 | 0        | 6.57E-05 | 0 | 6.57E-05 | 0.000723 |
| 0.001414 | 0.01578  | 0 | 0.22887  | 0.000625 | 6.57E-05 | 0 | 9.86E-05 | 9.86E-05 |
| 0.002038 | 0.023538 | 0 | 0.427792 | 6.57E-05 | 0.000263 | 0 | 0        | 0        |
| 0.001315 | 0.013741 | 0 | 0.335941 | 0        | 0        | 0 | 0        | 0        |
| 0.000493 | 0.001545 | 0 | 0.061705 | 0        | 0        | 0 | 0        | 0        |
| 0.001545 | 0.009205 | 0 | 0.349486 | 0        | 0.000625 | 0 | 0        | 0        |
| 0.00092  | 0.004274 | 0 | 0.199218 | 0        | 0.000822 | 0 | 0        | 0        |

|          |          |   |          |          |          |   |          |          |
|----------|----------|---|----------|----------|----------|---|----------|----------|
| 0.002268 | 0.00789  | 0 | 0.556823 | 0        | 0.000197 | 0 | 0        | 0        |
| 0.000986 | 0.019593 | 0 | 0.647852 | 0        | 0.00023  | 0 | 0        | 0        |
| 6.57E-05 | 0.000888 | 0 | 0.047174 | 0        | 0        | 0 | 0        | 0        |
| 0.00641  | 0.030672 | 0 | 0.276143 | 0        | 0.000329 | 0 | 0        | 0        |
| 0.001545 | 0.00503  | 0 | 0.215227 | 0        | 0.000164 | 0 | 0        | 0        |
| 0.000592 | 0.017325 | 0 | 0.604786 | 0        | 0.001151 | 0 | 0.00092  | 0        |
| 0.0024   | 0.007002 | 0 | 0.608271 | 0        | 0.000164 | 0 | 0        | 0        |
| 9.86E-05 | 0.001841 | 0 | 0.683027 | 0        | 0        | 0 | 6.57E-05 | 0        |
| 0.005621 | 0.014991 | 0 | 0.397054 | 0.000197 | 0.001808 | 0 | 0.000592 | 0        |
| 0.001414 | 0.012361 | 0 | 0.73099  | 0        | 0.000131 | 0 | 0.000131 | 0        |
| 0.002433 | 0.013906 | 0 | 0.564713 | 0        | 0.000559 | 0 | 0.000625 | 0        |
| 0.001479 | 0.013873 | 0 | 0.655051 | 0        | 0        | 0 | 0.000493 | 0        |
| 0.001808 | 0.078635 | 0 | 0.477826 | 0.000362 | 0.002926 | 0 | 0.001677 | 0        |
| 0.007693 | 0.102699 | 0 | 0.193596 | 0        | 0.000986 | 0 | 0.000164 | 0        |
| 0.001085 | 0.018771 | 0 | 0.463493 | 0        | 0.000427 | 0 | 9.86E-05 | 0        |
| 0.001381 | 0.019067 | 0 | 0.562017 | 0        | 0.000197 | 0 | 3.29E-05 | 0        |
| 0.000164 | 0.012426 | 0 | 0.360827 | 0        | 0.000296 | 0 | 0        | 0.000394 |
| 0.000723 | 0.022815 | 0 | 0.36875  | 0        | 0.000427 | 0 | 9.86E-05 | 0        |
| 0.000329 | 0.016963 | 0 | 0.582366 | 0        | 0.000263 | 0 | 9.86E-05 | 0        |
| 0.003616 | 0.00549  | 0 | 0.643151 | 0        | 0        | 0 | 6.57E-05 | 0        |
| 0.003024 | 0.022256 | 0 | 0.483349 | 0        | 0        | 0 | 0        | 0        |
| 0.000789 | 0.012952 | 0 | 0.539926 | 0        | 0.000296 | 0 | 0        | 0        |
| 0.000592 | 0.008251 | 0 | 0.59591  | 0        | 6.57E-05 | 0 | 9.86E-05 | 0        |
| 0.000329 | 0.002137 | 0 | 0.519708 | 0        | 0.000164 | 0 | 0.000197 | 0        |
| 0.000427 | 0.018179 | 0 | 0.471646 | 0        | 0.000493 | 0 | 0.000427 | 0        |
| 0.000263 | 0.061606 | 0 | 0.355699 | 3.29E-05 | 0.00023  | 0 | 0.00046  | 0        |
| 3.29E-05 | 0.00858  | 0 | 0.466288 | 0        | 0        | 0 | 0        | 0        |
| 0.000131 | 0.005063 | 0 | 0.656004 | 0        | 0.000263 | 0 | 0.000526 | 0        |
| 0.000559 | 0.011046 | 0 | 0.26753  | 0        | 9.86E-05 | 0 | 0.000164 | 0        |
| 0.001151 | 0.027318 | 0 | 0.385976 | 3.29E-05 | 0.000625 | 0 | 0.000559 | 0        |
| 0.008251 | 0.00881  | 0 | 0.205694 | 0.001019 | 0.011374 | 0 | 0.003518 | 0        |
| 0.001216 | 0.001775 | 0 | 0.428088 | 0        | 0.00023  | 0 | 0        | 0        |
| 0.001315 | 0.052369 | 0 | 0.707157 | 0        | 0.000164 | 0 | 0        | 0        |
| 0.002268 | 0.035734 | 0 | 0.459187 | 0        | 6.57E-05 | 0 | 0        | 0        |
| 0.002761 | 0.01979  | 0 | 0.271672 | 0        | 0        | 0 | 0        | 0        |
| 0        | 6.57E-05 | 0 | 0.749038 | 0        | 0        | 0 | 0        | 0        |
| 0        | 0.000526 | 0 | 0.058911 | 0        | 3.29E-05 | 0 | 0        | 0        |
| 0        | 0.000263 | 0 | 0.073835 | 0        | 0        | 0 | 0        | 0        |
| 0.000197 | 0.000362 | 0 | 0.009205 | 0        | 3.29E-05 | 0 | 0        | 0        |
| 0        | 0.001118 | 0 | 0.271771 | 0        | 0        | 0 | 0        | 0        |
| 6.57E-05 | 0.010618 | 0 | 0.212729 | 0        | 0        | 0 | 0        | 0        |
| 0        | 9.86E-05 | 0 | 0.090174 | 0        | 0        | 0 | 0        | 0        |
| 0        | 0.000329 | 0 | 0.025609 | 0        | 9.86E-05 | 0 | 0        | 0        |
| 0        | 0.001085 | 0 | 0.045498 | 0        | 0        | 0 | 0        | 0        |
| 0        | 0        | 0 | 0.002597 | 0        | 0        | 0 | 0        | 0        |
| 0.008416 | 0.03649  | 0 | 0.263421 | 6.57E-05 | 0        | 0 | 0.000131 | 0        |
| 0.002235 | 0.002235 | 0 | 0.112528 | 0.00069  | 0        | 0 | 0.002301 | 0        |

|          |          |   |          |          |          |          |          |          |
|----------|----------|---|----------|----------|----------|----------|----------|----------|
| 0.00023  | 0.019034 | 0 | 0.472172 | 0        | 0        | 0        | 6.57E-05 | 0        |
| 0        | 0.017325 | 0 | 0.572931 | 0        | 0        | 0        | 0        | 0        |
| 0.001381 | 0.020908 | 0 | 0.528354 | 0        | 3.29E-05 | 0        | 0        | 0        |
| 9.86E-05 | 0.018212 | 0 | 0.508366 | 0        | 0        | 0        | 0        | 0        |
| 0.000888 | 0.029653 | 0 | 0.649791 | 0        | 0        | 0        | 0        | 0        |
| 6.57E-05 | 0.011243 | 0 | 0.577369 | 0        | 0        | 0        | 0        | 0        |
| 0        | 0.000625 | 0 | 0.628193 | 0        | 0        | 0        | 0        | 0        |
| 0        | 0.000263 | 0 | 0.478254 | 0        | 0.000625 | 0        | 0        | 0        |
| 0        | 6.57E-05 | 0 | 0.594727 | 0        | 0        | 0        | 0        | 0        |
| 0.000756 | 0.022815 | 0 | 0.336993 | 0        | 0.000427 | 0        | 0.00069  | 0        |
| 0        | 0.000493 | 0 | 0.380124 | 0        | 0        | 0        | 0        | 0        |
| 0        | 0.000493 | 0 | 0.31339  | 0        | 0        | 0        | 0        | 0        |
| 3.29E-05 | 0.000723 | 0 | 0.150367 | 0        | 0.001972 | 0        | 0        | 0        |
| 9.86E-05 | 0.002663 | 0 | 0.353233 | 3.29E-05 | 6.57E-05 | 0        | 3.29E-05 | 0        |
| 3.29E-05 | 0.000855 | 0 | 0.61935  | 0        | 3.29E-05 | 0        | 0        | 0        |
| 3.29E-05 | 0.000197 | 0 | 0.37996  | 0        | 0        | 0        | 0        | 0        |
| 0        | 0.00046  | 0 | 0.513659 | 0        | 0        | 0        | 0        | 0        |
| 0        | 0.000131 | 0 | 0.548867 | 0        | 6.57E-05 | 0        | 0        | 0        |
| 3.29E-05 | 9.86E-05 | 0 | 0.27588  | 0        | 0        | 0        | 0        | 0        |
| 0        | 3.29E-05 | 0 | 0.056412 | 0        | 0        | 0        | 0        | 0        |
| 3.29E-05 | 0.001183 | 0 | 0.514119 | 0        | 0        | 0        | 0        | 0        |
| 3.29E-05 | 9.86E-05 | 0 | 0.053125 | 0        | 0        | 0        | 0        | 0        |
| 0        | 0.000197 | 0 | 0.304941 | 0        | 0        | 0        | 0        | 0        |
| 0        | 0.000855 | 0 | 0.227029 | 0        | 0        | 0        | 0        | 0        |
| 0.000394 | 0.008942 | 0 | 0.220257 | 0        | 0.00023  | 0        | 0.000329 | 0        |
| 9.86E-05 | 0.008975 | 0 | 0.644499 | 0        | 0        | 0        | 0        | 0        |
| 0.00092  | 0.002433 | 0 | 0.546172 | 0        | 0        | 0        | 0        | 0        |
| 0.000756 | 0.005194 | 0 | 0.514317 | 0        | 0.000131 | 0        | 0.00023  | 0        |
| 0.021697 | 0.116112 | 0 | 0.326506 | 0.000164 | 0.002926 | 0        | 0.001348 | 0        |
| 0.000394 | 0.010848 | 0 | 0.411585 | 0        | 6.57E-05 | 0        | 0.000657 | 0        |
| 0.000559 | 0.017292 | 0 | 0.44173  | 0        | 9.86E-05 | 0        | 0.000296 | 0        |
| 0.000855 | 0.0167   | 0 | 0.441566 | 0        | 0.000164 | 0        | 9.86E-05 | 0        |
| 0.000657 | 0.007462 | 0 | 0.318387 | 0        | 0        | 0        | 0.000131 | 0        |
| 0.007397 | 0.169499 | 0 | 0.231336 | 0        | 0.00023  | 0        | 9.86E-05 | 0        |
| 0.001151 | 0.019593 | 0 | 0.358657 | 0        | 9.86E-05 | 0        | 0        | 6.57E-05 |
| 0        | 0.002729 | 0 | 0.157862 | 0        | 0        | 0        | 0        | 0        |
| 0.031099 | 0.023604 | 0 | 0.11575  | 0.000131 | 0        | 0        | 0.000362 | 0        |
| 0.000164 | 0.012821 | 0 | 0.422631 | 0        | 0.000888 | 0        | 0        | 0        |
| 0.001151 | 0.002203 | 0 | 0.724021 | 0        | 0        | 0        | 0.00023  | 0        |
| 0.001446 | 0.00194  | 0 | 0.661593 | 0        | 0        | 0        | 9.86E-05 | 0        |
| 0.005589 | 0.016569 | 0 | 0.427101 | 0        | 0        | 0        | 0.000526 | 0        |
| 0.003255 | 0.031526 | 0 | 0.272067 | 9.86E-05 | 0.004208 | 0        | 0.001545 | 0.000723 |
| 0.000789 | 0.01052  | 0 | 0.348434 | 0        | 0        | 0        | 3.29E-05 | 6.57E-05 |
| 0.014202 | 0.070778 | 0 | 0.502646 | 0.00023  | 0.000953 | 3.29E-05 | 0.000493 | 0.000526 |
| 0.004175 | 0.040468 | 0 | 0.34896  | 0.000362 | 0.003649 | 0        | 0.001578 | 0.000986 |
| 0.001545 | 0.013084 | 0 | 0.6993   | 6.57E-05 | 0.000427 | 0        | 0.000329 | 0.000427 |
| 0.001216 | 0.009862 | 0 | 0.538742 | 0        | 0.00092  | 0        | 0.000559 | 0        |

|          |          |   |          |          |          |   |          |          |
|----------|----------|---|----------|----------|----------|---|----------|----------|
| 6.57E-05 | 0.003287 | 0 | 0.827443 | 0        | 0        | 0 | 0.000197 | 0        |
| 0        | 0.006936 | 0 | 0.679904 | 0        | 0        | 0 | 6.57E-05 | 0        |
| 0.00023  | 0.013709 | 0 | 0.640028 | 0        | 0        | 0 | 6.57E-05 | 0        |
| 0.000888 | 0.027614 | 0 | 0.520596 | 3.29E-05 | 9.86E-05 | 0 | 0.000263 | 0        |
| 0.005161 | 0.040501 | 0 | 0.445544 | 0        | 0        | 0 | 0.000263 | 0        |
| 0.003583 | 0.027417 | 0 | 0.643611 | 0        | 0        | 0 | 0.000263 | 0        |
| 0.008975 | 0.026497 | 0 | 0.616983 | 0        | 3.29E-05 | 0 | 0.00046  | 0        |
| 0.000986 | 0.054407 | 0 | 0.540419 | 0        | 6.57E-05 | 0 | 0.000526 | 6.57E-05 |
| 0.000986 | 0.034912 | 0 | 0.695552 | 0        | 0        | 0 | 0.000756 | 0        |
| 0.001611 | 0.020415 | 0 | 0.623689 | 0        | 0        | 0 | 0.000559 | 0        |
| 0.002729 | 0.012985 | 0 | 0.495118 | 0        | 0        | 0 | 0.000362 | 0        |
| 0.001118 | 0.008843 | 0 | 0.668497 | 0        | 0        | 0 | 0.000263 | 0        |
| 0.004274 | 0.019494 | 0 | 0.470298 | 0        | 0        | 0 | 0.000953 | 0        |
| 0.000164 | 0.011013 | 0 | 0.064368 | 0        | 6.57E-05 | 0 | 0.000131 | 0        |
| 3.29E-05 | 0.006608 | 0 | 0.285479 | 0        | 3.29E-05 | 0 | 0.00023  | 0        |
| 6.57E-05 | 0.003978 | 0 | 0.175647 | 0        | 3.29E-05 | 0 | 9.86E-05 | 0        |
| 3.29E-05 | 0.002531 | 0 | 0.030442 | 0        | 0        | 0 | 0        | 0        |
| 3.29E-05 | 0.008942 | 0 | 0.442618 | 0        | 9.86E-05 | 0 | 0.000296 | 0        |
| 6.57E-05 | 0.008482 | 0 | 0.411119 | 0        | 9.86E-05 | 0 | 0.00023  | 0        |
| 6.57E-05 | 0.007627 | 0 | 0.421743 | 0        | 6.57E-05 | 0 | 0.000164 | 0        |
| 9.86E-05 | 0.004504 | 0 | 0.27759  | 0        | 0        | 0 | 0        | 0        |
| 0.000164 | 0.004044 | 0 | 0.386206 | 0        | 6.57E-05 | 0 | 0.000296 | 0        |
| 3.29E-05 | 0.007725 | 0 | 0.261087 | 0        | 3.29E-05 | 0 | 9.86E-05 | 0        |
| 9.86E-05 | 0.004471 | 0 | 0.186594 | 0        | 0        | 0 | 0.000131 | 0        |
| 0.000756 | 0.025642 | 0 | 0.354614 | 0        | 0.000329 | 0 | 0.000197 | 0        |
| 0        | 0.000197 | 0 | 0.011802 | 0        | 0        | 0 | 0        | 0        |
| 3.29E-05 | 0.000888 | 0 | 0.01601  | 0        | 3.29E-05 | 0 | 3.29E-05 | 3.29E-05 |
| 0        | 3.29E-05 | 0 | 0.001151 | 0        | 0        | 0 | 0        | 0        |
| 0        | 6.57E-05 | 0 | 0.022585 | 0        | 0        | 0 | 0        | 0        |
| 0        | 0        | 0 | 0.007528 | 0        | 0        | 0 | 0        | 0        |
| 0        | 6.57E-05 | 0 | 0.005194 | 0        | 0        | 0 | 0        | 0        |
| 0        | 3.29E-05 | 0 | 0.00572  | 0        | 0        | 0 | 0        | 0        |
| 0        | 0        | 0 | 0.002203 | 0        | 0        | 0 | 0        | 0        |
| 0        | 0        | 0 | 0.003583 | 0        | 3.29E-05 | 0 | 0        | 0        |
| 0        | 0.000164 | 0 | 0.001479 | 0        | 6.57E-05 | 0 | 0        | 0        |
| 0.002038 | 0.029159 | 0 | 0.319767 | 0        | 0.000329 | 0 | 9.86E-05 | 0        |
| 0.001315 | 0.023702 | 0 | 0.261284 | 3.29E-05 | 9.86E-05 | 0 | 0.000197 | 0        |
| 0.001052 | 0.013774 | 0 | 0.46849  | 0        | 0.000723 | 0 | 3.29E-05 | 0        |
| 0.006082 | 0.04369  | 0 | 0.240639 | 0        | 0.000263 | 0 | 0.000263 | 0        |
| 0.000723 | 0.005424 | 0 | 0.398764 | 0.000131 | 0.000723 | 0 | 0.00023  | 0        |
| 0.004964 | 0.039811 | 0 | 0.39071  | 0.000164 | 0.001118 | 0 | 0.000394 | 0        |
| 0.000592 | 0.00092  | 0 | 0.543082 | 0        | 3.29E-05 | 0 | 0.000164 | 0        |
| 0.00092  | 0.008679 | 0 | 0.459976 | 0        | 6.57E-05 | 0 | 0.000131 | 0        |
| 0.002466 | 0.027023 | 0 | 0.545613 | 0        | 3.29E-05 | 0 | 0        | 0        |
| 0.001019 | 0.032776 | 0 | 0.43463  | 0        | 0        | 0 | 0        | 0        |
| 0.000263 | 0.01098  | 0 | 0.263158 | 0        | 0        | 0 | 0        | 0        |
| 6.57E-05 | 0.006871 | 0 | 0.251948 | 0        | 3.29E-05 | 0 | 0        | 0        |



|          |          |          |          |          |          |          |          |          |
|----------|----------|----------|----------|----------|----------|----------|----------|----------|
| 0.000592 | 0.014498 | 0        | 0.442125 | 0        | 0        | 0        | 0.000131 | 0        |
| 0        | 0.006115 | 0        | 0.578849 | 0        | 0        | 0        | 3.29E-05 | 0        |
| 0        | 0.015681 | 0        | 0.620796 | 0        | 0        | 0        | 0        | 0        |
| 0        | 0.030047 | 0        | 0.48187  | 0        | 0        | 0        | 0        | 0        |
| 0        | 0.006805 | 0        | 0.455702 | 0        | 0        | 0        | 0        | 0        |
| 0.00069  | 0.003682 | 0        | 0.173872 | 0        | 0.000855 | 0        | 3.29E-05 | 0        |
| 0.004504 | 0.004438 | 0        | 0.187087 | 0.000197 | 0.001282 | 0        | 0.000427 | 0        |
| 0.003748 | 0.0334   | 0        | 0.630823 | 6.57E-05 | 0.000855 | 0        | 0        | 0        |
| 0.002761 | 0.003649 | 0        | 0.15464  | 0        | 0.000394 | 0        | 0        | 0        |
| 0.000526 | 0.003255 | 0        | 0.54844  | 0        | 0.000394 | 0        | 9.86E-05 | 0        |
| 0.000592 | 0.001972 | 0        | 0.169631 | 0        | 6.57E-05 | 0        | 6.57E-05 | 3.29E-05 |
| 0.000197 | 0.000263 | 0        | 0.365988 | 6.57E-05 | 0.000197 | 0        | 3.29E-05 | 3.29E-05 |
| 0.000263 | 0.002926 | 0        | 0.05467  | 0        | 3.29E-05 | 0        | 0        | 0        |
| 0.00023  | 0.002959 | 0        | 0.087182 | 0        | 3.29E-05 | 0        | 0        | 0        |
| 0.000526 | 0.007101 | 0        | 0.471942 | 9.86E-05 | 0.00023  | 0        | 0        | 0        |
| 0.000888 | 0.009238 | 0        | 0.289523 | 3.29E-05 | 0.000296 | 0        | 3.29E-05 | 0        |
| 0.000197 | 0.001381 | 0        | 0.04964  | 0        | 3.29E-05 | 0        | 0        | 0        |
| 0.002268 | 0.003156 | 0        | 0.156218 | 9.86E-05 | 0.000263 | 0        | 9.86E-05 | 0        |
| 0.000131 | 0.011079 | 0        | 0.351063 | 0        | 0.000394 | 0        | 0        | 0        |
| 0.000526 | 0.004767 | 0        | 0.046517 | 0        | 3.29E-05 | 0        | 0        | 0        |
| 0.006213 | 0.028469 | 6.57E-05 | 0.158322 | 3.29E-05 | 0.000493 | 6.57E-05 | 9.86E-05 | 0        |
| 0.002235 | 0.019462 | 0        | 0.104408 | 3.29E-05 | 0.000197 | 0        | 0        | 0        |
| 0.000131 | 0.001118 | 0        | 0.112758 | 0        | 0        | 0        | 0        | 0        |





|          |          |          |   |          |          |   |          |   |
|----------|----------|----------|---|----------|----------|---|----------|---|
| 0        | 0        | 0        | 0 | 0        | 0        | 0 | 0        | 0 |
| 0        | 0        | 0        | 0 | 0.000131 | 0        | 0 | 0        | 0 |
| 0        | 0        | 0        | 0 | 3.29E-05 | 0        | 0 | 0        | 0 |
| 0        | 0        | 0        | 0 | 0.000855 | 0        | 0 | 0        | 0 |
| 0        | 0        | 0        | 0 | 0        | 0        | 0 | 0        | 0 |
| 0        | 3.29E-05 | 0        | 0 | 0        | 0        | 0 | 0        | 0 |
| 0        | 0        | 0        | 0 | 0        | 0        | 0 | 0        | 0 |
| 0        | 0        | 0        | 0 | 0        | 0        | 0 | 0        | 0 |
| 0        | 9.86E-05 | 0        | 0 | 0        | 0        | 0 | 0        | 0 |
| 0        | 0        | 0        | 0 | 0        | 0        | 0 | 0        | 0 |
| 3.29E-05 | 0        | 3.29E-05 | 0 | 0        | 0        | 0 | 3.29E-05 | 0 |
| 0        | 0        | 0        | 0 | 0        | 0        | 0 | 0        | 0 |
| 0        | 0        | 0        | 0 | 0        | 0        | 0 | 0        | 0 |
| 0        | 6.57E-05 | 0        | 0 | 3.29E-05 | 0.000197 | 0 | 0        | 0 |
| 0        | 0        | 0        | 0 | 0        | 0        | 0 | 0        | 0 |
| 0        | 0        | 0        | 0 | 0        | 0        | 0 | 0        | 0 |
| 0        | 0        | 0        | 0 | 0        | 0.000131 | 0 | 0        | 0 |
| 0        | 0        | 0        | 0 | 0.000197 | 3.29E-05 | 0 | 0        | 0 |
| 0        | 0        | 0        | 0 | 0        | 0        | 0 | 0        | 0 |
| 0        | 0        | 0        | 0 | 0        | 0        | 0 | 0        | 0 |
| 0        | 0.000394 | 6.57E-05 | 0 | 9.86E-05 | 0.000296 | 0 | 0        | 0 |
| 0        | 0        | 0        | 0 | 0.001151 | 0        | 0 | 0        | 0 |
| 0        | 0        | 0        | 0 | 0.000526 | 0        | 0 | 0        | 0 |
| 0        | 0        | 3.29E-05 | 0 | 0.00046  | 0        | 0 | 0        | 0 |
| 0        | 0        | 0        | 0 | 0.000362 | 0        | 0 | 0        | 0 |
| 0        | 0        | 0        | 0 | 0.000296 | 0        | 0 | 0        | 0 |
| 0        | 0        | 0        | 0 | 3.29E-05 | 0        | 0 | 0        | 0 |
| 0        | 0        | 0        | 0 | 0.000197 | 0        | 0 | 0        | 0 |
| 0        | 0        | 0        | 0 | 0        | 0        | 0 | 0        | 0 |
| 0        | 0        | 0        | 0 | 6.57E-05 | 0        | 0 | 0        | 0 |
| 0        | 0        | 0        | 0 | 0        | 0        | 0 | 0        | 0 |
| 0        | 0        | 0        | 0 | 0.000493 | 0        | 0 | 0        | 0 |
| 0        | 0        | 0        | 0 | 0        | 0        | 0 | 0        | 0 |
| 0        | 0        | 0        | 0 | 3.29E-05 | 0        | 0 | 0        | 0 |
| 0        | 0        | 0        | 0 | 0.000526 | 0        | 0 | 0        | 0 |
| 0        | 0        | 0        | 0 | 0.000559 | 0        | 0 | 0        | 0 |
| 0        | 0        | 0        | 0 | 9.86E-05 | 0        | 0 | 0        | 0 |
| 0        | 0        | 0        | 0 | 0.00069  | 0        | 0 | 0        | 0 |
| 0        | 0        | 0        | 0 | 0.000888 | 0        | 0 | 0        | 0 |
| 0        | 0        | 0        | 0 | 0.001249 | 0        | 0 | 0        | 0 |
| 0        | 0.000164 | 0        | 0 | 0.002005 | 9.86E-05 | 0 | 0        | 0 |
| 0        | 0        | 0        | 0 | 0.001512 | 0        | 0 | 0        | 0 |
| 0        | 0        | 0        | 0 | 0.000625 | 0        | 0 | 0        | 0 |
| 0        | 0        | 0        | 0 | 0.000329 | 0        | 0 | 0        | 0 |
| 0        | 0        | 0        | 0 | 0.000592 | 0        | 0 | 0        | 0 |
| 0        | 0        | 0        | 0 | 0.001019 | 0        | 0 | 0        | 0 |
| 0        | 0        | 0        | 0 | 0.004602 | 0        | 0 | 0        | 0 |



|   |          |          |          |          |          |   |   |   |
|---|----------|----------|----------|----------|----------|---|---|---|
| 0 | 0        | 3.29E-05 | 0        | 0.000131 | 0        | 0 | 0 | 0 |
| 0 | 0        | 0        | 0        | 0        | 0        | 0 | 0 | 0 |
| 0 | 0        | 0        | 0        | 0.000526 | 9.86E-05 | 0 | 0 | 0 |
| 0 | 0        | 0        | 0        | 0        | 0        | 0 | 0 | 0 |
| 0 | 0        | 0        | 0        | 0        | 0        | 0 | 0 | 0 |
| 0 | 0        | 0        | 0        | 0        | 0        | 0 | 0 | 0 |
| 0 | 0        | 0        | 0        | 0        | 0        | 0 | 0 | 0 |
| 0 | 0        | 0        | 0        | 0        | 0        | 0 | 0 | 0 |
| 0 | 0        | 0        | 0        | 3.29E-05 | 0        | 0 | 0 | 0 |
| 0 | 0        | 0        | 0        | 0        | 0        | 0 | 0 | 0 |
| 0 | 0        | 0        | 0        | 0        | 0        | 0 | 0 | 0 |
| 0 | 0        | 0        | 0        | 9.86E-05 | 0        | 0 | 0 | 0 |
| 0 | 0        | 0        | 0        | 0.00069  | 0        | 0 | 0 | 0 |
| 0 | 0        | 0        | 0        | 0.002663 | 0        | 0 | 0 | 0 |
| 0 | 0        | 0        | 0        | 0.002564 | 3.29E-05 | 0 | 0 | 0 |
| 0 | 0        | 0        | 0        | 0        | 0        | 0 | 0 | 0 |
| 0 | 0        | 0        | 0        | 0        | 0        | 0 | 0 | 0 |
| 0 | 0        | 0        | 0        | 0        | 0        | 0 | 0 | 0 |
| 0 | 0        | 0        | 0        | 0        | 0        | 0 | 0 | 0 |
| 0 | 0        | 0        | 3.29E-05 | 0        | 6.57E-05 | 0 | 0 | 0 |
| 0 | 0        | 0        | 0        | 0        | 0        | 0 | 0 | 0 |
| 0 | 0.000197 | 3.29E-05 | 0        | 0        | 3.29E-05 | 0 | 0 | 0 |
| 0 | 0        | 0        | 0        | 0        | 0        | 0 | 0 | 0 |
| 0 | 0        | 0        | 0        | 0        | 0        | 0 | 0 | 0 |
| 0 | 0        | 0        | 0        | 0        | 0        | 0 | 0 | 0 |
| 0 | 0        | 0        | 0        | 0        | 0        | 0 | 0 | 0 |
| 0 | 0        | 0        | 0        | 0.001183 | 0        | 0 | 0 | 0 |
| 0 | 0        | 0        | 0        | 0        | 0        | 0 | 0 | 0 |
| 0 | 0        | 0        | 0        | 0        | 0        | 0 | 0 | 0 |
| 0 | 0        | 0        | 0        | 0        | 0        | 0 | 0 | 0 |
| 0 | 0        | 0        | 0        | 0        | 0        | 0 | 0 | 0 |
| 0 | 0        | 0        | 0        | 0        | 0        | 0 | 0 | 0 |
| 0 | 0        | 0        | 0        | 0        | 0        | 0 | 0 | 0 |
| 0 | 0        | 0        | 0        | 0        | 0        | 0 | 0 | 0 |
| 0 | 0        | 0        | 0        | 0        | 0        | 0 | 0 | 0 |
| 0 | 3.29E-05 | 0        | 0        | 0        | 0        | 0 | 0 | 0 |
| 0 | 0        | 0        | 0        | 0        | 0        | 0 | 0 | 0 |
| 0 | 0        | 0        | 0        | 6.57E-05 | 0        | 0 | 0 | 0 |
| 0 | 0        | 0        | 0        | 0.000164 | 0        | 0 | 0 | 0 |
| 0 | 0        | 0        | 0        | 0.00023  | 0        | 0 | 0 | 0 |
| 0 | 0        | 0        | 0        | 0.002137 | 0        | 0 | 0 | 0 |
| 0 | 0        | 0        | 0        | 0.000756 | 0        | 0 | 0 | 0 |
| 0 | 0        | 0        | 0        | 0.000329 | 0        | 0 | 0 | 0 |
| 0 | 0        | 0        | 0        | 0.00023  | 0        | 0 | 0 | 0 |
| 0 | 0        | 0        | 0        | 6.57E-05 | 0        | 0 | 0 | 0 |
| 0 | 0        | 0        | 0        | 0.000625 | 0        | 0 | 0 | 0 |

|   |          |          |   |          |          |   |   |   |
|---|----------|----------|---|----------|----------|---|---|---|
| 0 | 0        | 0        | 0 | 0.000164 | 0        | 0 | 0 | 0 |
| 0 | 0        | 0        | 0 | 0        | 0        | 0 | 0 | 0 |
| 0 | 0        | 0        | 0 | 0.000263 | 0        | 0 | 0 | 0 |
| 0 | 0        | 6.57E-05 | 0 | 0        | 0        | 0 | 0 | 0 |
| 0 | 0        | 6.57E-05 | 0 | 0        | 3.29E-05 | 0 | 0 | 0 |
| 0 | 0        | 0        | 0 | 0        | 0        | 0 | 0 | 0 |
| 0 | 0        | 0        | 0 | 0.000559 | 0        | 0 | 0 | 0 |
| 0 | 0        | 0        | 0 | 0        | 0        | 0 | 0 | 0 |
| 0 | 0        | 0.000164 | 0 | 3.29E-05 | 0        | 0 | 0 | 0 |
| 0 | 0        | 0        | 0 | 0.001841 | 0        | 0 | 0 | 0 |
| 0 | 0        | 0        | 0 | 0        | 0        | 0 | 0 | 0 |
| 0 | 0        | 0        | 0 | 0.001972 | 0        | 0 | 0 | 0 |
| 0 | 0        | 0        | 0 | 0        | 0        | 0 | 0 | 0 |
| 0 | 0        | 0        | 0 | 0        | 0        | 0 | 0 | 0 |
| 0 | 6.57E-05 | 0        | 0 | 0.000723 | 0        | 0 | 0 | 0 |
| 0 | 0        | 0        | 0 | 3.29E-05 | 0        | 0 | 0 | 0 |
| 0 | 0        | 0        | 0 | 0.000394 | 0        | 0 | 0 | 0 |
| 0 | 0        | 0        | 0 | 3.29E-05 | 0        | 0 | 0 | 0 |
| 0 | 0        | 0        | 0 | 0.00046  | 0        | 0 | 0 | 0 |
| 0 | 0        | 0        | 0 | 0.000131 | 0        | 0 | 0 | 0 |
| 0 | 0        | 0        | 0 | 0.000756 | 0        | 0 | 0 | 0 |
| 0 | 0        | 0        | 0 | 0.000394 | 0        | 0 | 0 | 0 |
| 0 | 0        | 0        | 0 | 0        | 0        | 0 | 0 | 0 |
| 0 | 0        | 0        | 0 | 3.29E-05 | 0        | 0 | 0 | 0 |
| 0 | 0        | 0        | 0 | 0        | 0        | 0 | 0 | 0 |
| 0 | 0        | 0        | 0 | 0        | 0        | 0 | 0 | 0 |
| 0 | 0        | 0        | 0 | 0        | 0        | 0 | 0 | 0 |
| 0 | 0        | 0        | 0 | 0        | 0        | 0 | 0 | 0 |
| 0 | 0        | 0        | 0 | 0        | 0        | 0 | 0 | 0 |
| 0 | 0        | 0        | 0 | 0        | 0        | 0 | 0 | 0 |
| 0 | 0        | 0        | 0 | 0.000164 | 0        | 0 | 0 | 0 |
| 0 | 0        | 0        | 0 | 0.000197 | 0        | 0 | 0 | 0 |
| 0 | 0        | 0        | 0 | 0        | 0        | 0 | 0 | 0 |
| 0 | 0        | 0        | 0 | 9.86E-05 | 0        | 0 | 0 | 0 |
| 0 | 0        | 0        | 0 | 0        | 0        | 0 | 0 | 0 |
| 0 | 0        | 0        | 0 | 0        | 0        | 0 | 0 | 0 |
| 0 | 0        | 0        | 0 | 0.003255 | 0        | 0 | 0 | 0 |
| 0 | 0        | 0        | 0 | 0        | 0        | 0 | 0 | 0 |
| 0 | 0        | 0        | 0 | 0        | 0        | 0 | 0 | 0 |
| 0 | 0        | 0        | 0 | 0        | 0        | 0 | 0 | 0 |
| 0 | 0        | 0        | 0 | 0        | 0        | 0 | 0 | 0 |
| 0 | 0        | 0        | 0 | 9.86E-05 | 0        | 0 | 0 | 0 |
| 0 | 0        | 0        | 0 | 0        | 0        | 0 | 0 | 0 |
| 0 | 0        | 3.29E-05 | 0 | 0.000131 | 3.29E-05 | 0 | 0 | 0 |
| 0 | 0        | 0        | 0 | 3.29E-05 | 3.29E-05 | 0 | 0 | 0 |





|   |          |   |   |          |          |   |          |          |
|---|----------|---|---|----------|----------|---|----------|----------|
| 0 | 0        | 0 | 0 | 0.000197 | 3.29E-05 | 0 | 0        | 0        |
| 0 | 0        | 0 | 0 | 0.000164 | 0        | 0 | 0        | 0        |
| 0 | 0        | 0 | 0 | 0.000329 | 0        | 0 | 0        | 0        |
| 0 | 0        | 0 | 0 | 9.86E-05 | 0        | 0 | 0        | 0        |
| 0 | 0        | 0 | 0 | 0        | 0        | 0 | 0        | 0        |
| 0 | 0        | 0 | 0 | 0.000592 | 0        | 0 | 0        | 0        |
| 0 | 0        | 0 | 0 | 0.001414 | 0        | 0 | 0        | 0        |
| 0 | 0        | 0 | 0 | 6.57E-05 | 0        | 0 | 0        | 0        |
| 0 | 0        | 0 | 0 | 0.000164 | 0        | 0 | 0        | 0        |
| 0 | 0        | 0 | 0 | 0.004734 | 0        | 0 | 0        | 0        |
| 0 | 0        | 0 | 0 | 0.001249 | 0        | 0 | 0        | 0        |
| 0 | 0        | 0 | 0 | 0        | 0        | 0 | 0        | 0        |
| 0 | 0        | 0 | 0 | 0.000657 | 0        | 0 | 0        | 0        |
| 0 | 0        | 0 | 0 | 0        | 0        | 0 | 0        | 0        |
| 0 | 0        | 0 | 0 | 0.000329 | 0        | 0 | 0        | 0        |
| 0 | 0        | 0 | 0 | 0.000164 | 0        | 0 | 0        | 0        |
| 0 | 0        | 0 | 0 | 6.57E-05 | 0        | 0 | 0        | 0        |
| 0 | 0        | 0 | 0 | 0.000296 | 0        | 0 | 0        | 0        |
| 0 | 0        | 0 | 0 | 0.000493 | 0        | 0 | 0        | 0        |
| 0 | 0        | 0 | 0 | 0.000164 | 0        | 0 | 0        | 0        |
| 0 | 0        | 0 | 0 | 6.57E-05 | 0        | 0 | 0        | 0        |
| 0 | 0        | 0 | 0 | 9.86E-05 | 0        | 0 | 0        | 0        |
| 0 | 3.29E-05 | 0 | 0 | 6.57E-05 | 0        | 0 | 0        | 0        |
| 0 | 0        | 0 | 0 | 0        | 0        | 0 | 0        | 0        |
| 0 | 0        | 0 | 0 | 0.000164 | 0        | 0 | 0        | 0        |
| 0 | 0        | 0 | 0 | 6.57E-05 | 0        | 0 | 0        | 0        |
| 0 | 0        | 0 | 0 | 0.000164 | 3.29E-05 | 0 | 0        | 0        |
| 0 | 0        | 0 | 0 | 0.001907 | 0        | 0 | 0        | 0        |
| 0 | 0        | 0 | 0 | 0        | 0        | 0 | 0        | 0        |
| 0 | 0        | 0 | 0 | 0.001183 | 0        | 0 | 0        | 0        |
| 0 | 0        | 0 | 0 | 0.002564 | 0        | 0 | 0        | 0        |
| 0 | 0        | 0 | 0 | 0        | 0        | 0 | 0        | 0        |
| 0 | 0        | 0 | 0 | 0        | 0        | 0 | 0        | 0        |
| 0 | 0        | 0 | 0 | 0.00046  | 0        | 0 | 0        | 0        |
| 0 | 0        | 0 | 0 | 0        | 0        | 0 | 0        | 0        |
| 0 | 0        | 0 | 0 | 0.005128 | 0        | 0 | 0        | 0        |
| 0 | 0        | 0 | 0 | 3.29E-05 | 0        | 0 | 0        | 0        |
| 0 | 0        | 0 | 0 | 0.000756 | 0        | 0 | 0        | 0        |
| 0 | 0        | 0 | 0 | 3.29E-05 | 0        | 0 | 0        | 6.57E-05 |
| 0 | 0.000197 | 0 | 0 | 0        | 0        | 0 | 0        | 0        |
| 0 | 3.29E-05 | 0 | 0 | 0        | 0        | 0 | 0        | 0        |
| 0 | 3.29E-05 | 0 | 0 | 0        | 0        | 0 | 0        | 0        |
| 0 | 0        | 0 | 0 | 0.000822 | 0        | 0 | 0        | 0        |
| 0 | 0        | 0 | 0 | 0.001216 | 0        | 0 | 0        | 0        |
| 0 | 0        | 0 | 0 | 0.000362 | 0        | 0 | 0        | 0        |
| 0 | 0.000362 | 0 | 0 | 0        | 0.00046  | 0 | 0.000427 | 0        |
| 0 | 9.86E-05 | 0 | 0 | 0        | 0        | 0 | 0        | 0        |

|   |          |          |   |          |          |   |   |   |
|---|----------|----------|---|----------|----------|---|---|---|
| 0 | 3.29E-05 | 0        | 0 | 0        | 0.000164 | 0 | 0 | 0 |
| 0 | 0        | 0        | 0 | 0        | 0        | 0 | 0 | 0 |
| 0 | 3.29E-05 | 9.86E-05 | 0 | 0        | 3.29E-05 | 0 | 0 | 0 |
| 0 | 0        | 0        | 0 | 9.86E-05 | 0        | 0 | 0 | 0 |
| 0 | 0        | 0        | 0 | 0        | 0        | 0 | 0 | 0 |
| 0 | 0        | 0        | 0 | 0        | 0        | 0 | 0 | 0 |
| 0 | 0        | 0        | 0 | 0        | 0        | 0 | 0 | 0 |
| 0 | 0        | 0        | 0 | 0        | 0        | 0 | 0 | 0 |
| 0 | 0        | 0        | 0 | 0        | 0        | 0 | 0 | 0 |
| 0 | 0        | 0        | 0 | 0        | 0        | 0 | 0 | 0 |
| 0 | 0        | 0        | 0 | 0        | 0        | 0 | 0 | 0 |
| 0 | 0        | 0        | 0 | 0        | 0        | 0 | 0 | 0 |
| 0 | 0        | 0        | 0 | 0        | 0        | 0 | 0 | 0 |
| 0 | 0        | 0        | 0 | 0        | 0        | 0 | 0 | 0 |
| 0 | 0        | 0        | 0 | 0        | 0        | 0 | 0 | 0 |
| 0 | 0        | 0        | 0 | 0        | 0        | 0 | 0 | 0 |
| 0 | 0        | 0        | 0 | 0        | 0        | 0 | 0 | 0 |
| 0 | 0        | 0        | 0 | 0.000362 | 3.29E-05 | 0 | 0 | 0 |
| 0 | 0        | 0        | 0 | 0        | 0        | 0 | 0 | 0 |
| 0 | 0        | 0        | 0 | 0        | 0        | 0 | 0 | 0 |
| 0 | 0        | 0        | 0 | 3.29E-05 | 6.57E-05 | 0 | 0 | 0 |
| 0 | 0        | 0        | 0 | 3.29E-05 | 0        | 0 | 0 | 0 |
| 0 | 0        | 0        | 0 | 6.57E-05 | 0        | 0 | 0 | 0 |
| 0 | 3.29E-05 | 0        | 0 | 0        | 0        | 0 | 0 | 0 |
| 0 | 3.29E-05 | 0.000197 | 0 | 0        | 0        | 0 | 0 | 0 |
| 0 | 0        | 0        | 0 | 0        | 0        | 0 | 0 | 0 |
| 0 | 3.29E-05 | 0        | 0 | 0.000131 | 0        | 0 | 0 | 0 |
| 0 | 0        | 0        | 0 | 0        | 0        | 0 | 0 | 0 |
| 0 | 0        | 0        | 0 | 0        | 0        | 0 | 0 | 0 |
| 0 | 0        | 0        | 0 | 0        | 0        | 0 | 0 | 0 |
| 0 | 0        | 0        | 0 | 0.000164 | 0        | 0 | 0 | 0 |
| 0 | 0        | 0        | 0 | 9.86E-05 | 0        | 0 | 0 | 0 |
| 0 | 0        | 0        | 0 | 0.000822 | 0        | 0 | 0 | 0 |
| 0 | 0        | 0        | 0 | 0.000131 | 0        | 0 | 0 | 0 |
| 0 | 0        | 0        | 0 | 0.00023  | 0        | 0 | 0 | 0 |
| 0 | 0        | 0        | 0 | 3.29E-05 | 0        | 0 | 0 | 0 |
| 0 | 0        | 0        | 0 | 0.001216 | 0        | 0 | 0 | 0 |
| 0 | 0        | 0        | 0 | 0.000657 | 0        | 0 | 0 | 0 |
| 0 | 0        | 0        | 0 | 0.000164 | 3.29E-05 | 0 | 0 | 0 |
| 0 | 0        | 0        | 0 | 0.001118 | 0        | 0 | 0 | 0 |
| 0 | 0        | 0        | 0 | 0.000822 | 0        | 0 | 0 | 0 |
| 0 | 0        | 0        | 0 | 0.000329 | 0        | 0 | 0 | 0 |
| 0 | 0        | 0        | 0 | 0.002498 | 0        | 0 | 0 | 0 |
| 0 | 0        | 0        | 0 | 9.86E-05 | 0        | 0 | 0 | 0 |
| 0 | 0        | 0        | 0 | 0        | 0        | 0 | 0 | 0 |
| 0 | 0        | 0        | 0 | 0.00023  | 0        | 0 | 0 | 0 |
| 0 | 0        | 6.57E-05 | 0 | 9.86E-05 | 0        | 0 | 0 | 0 |

|   |          |          |   |          |          |   |   |   |
|---|----------|----------|---|----------|----------|---|---|---|
| 0 | 0        | 0        | 0 | 0.000263 | 0        | 0 | 0 | 0 |
| 0 | 0        | 0        | 0 | 0.000592 | 0        | 0 | 0 | 0 |
| 0 | 0        | 0        | 0 | 0        | 0        | 0 | 0 | 0 |
| 0 | 0        | 0        | 0 | 0.001709 | 0        | 0 | 0 | 0 |
| 0 | 0        | 0        | 0 | 0.000263 | 0        | 0 | 0 | 0 |
| 0 | 3.29E-05 | 0        | 0 | 0.001348 | 0        | 0 | 0 | 0 |
| 0 | 0        | 0        | 0 | 0.000362 | 0        | 0 | 0 | 0 |
| 0 | 0        | 0        | 0 | 6.57E-05 | 0        | 0 | 0 | 0 |
| 0 | 0        | 0        | 0 | 0.001742 | 0        | 0 | 0 | 0 |
| 0 | 0        | 0        | 0 | 0.000756 | 0        | 0 | 0 | 0 |
| 0 | 0        | 0        | 0 | 0.003222 | 0        | 0 | 0 | 0 |
| 0 | 0        | 0        | 0 | 0.000855 | 0        | 0 | 0 | 0 |
| 0 | 0        | 0        | 0 | 0.007627 | 0        | 0 | 0 | 0 |
| 0 | 9.86E-05 | 0        | 0 | 0.006246 | 9.86E-05 | 0 | 0 | 0 |
| 0 | 0        | 0        | 0 | 0.000493 | 0.000131 | 0 | 0 | 0 |
| 0 | 0        | 0        | 0 | 9.86E-05 | 0        | 0 | 0 | 0 |
| 0 | 0        | 0        | 0 | 0        | 0.000197 | 0 | 0 | 0 |
| 0 | 0        | 0        | 0 | 9.86E-05 | 6.57E-05 | 0 | 0 | 0 |
| 0 | 0        | 0        | 0 | 9.86E-05 | 0        | 0 | 0 | 0 |
| 0 | 6.57E-05 | 0        | 0 | 0        | 0        | 0 | 0 | 0 |
| 0 | 0        | 0        | 0 | 0.000362 | 9.86E-05 | 0 | 0 | 0 |
| 0 | 0        | 0        | 0 | 0.001808 | 9.86E-05 | 0 | 0 | 0 |
| 0 | 3.29E-05 | 0        | 0 | 0.000657 | 0        | 0 | 0 | 0 |
| 0 | 0        | 0        | 0 | 0.001183 | 0        | 0 | 0 | 0 |
| 0 | 0        | 0        | 0 | 0.00023  | 0        | 0 | 0 | 0 |
| 0 | 0        | 0        | 0 | 0.00092  | 0.001249 | 0 | 0 | 0 |
| 0 | 0        | 0        | 0 | 0        | 0        | 0 | 0 | 0 |
| 0 | 0        | 0        | 0 | 6.57E-05 | 3.29E-05 | 0 | 0 | 0 |
| 0 | 0        | 0        | 0 | 3.29E-05 | 3.29E-05 | 0 | 0 | 0 |
| 0 | 6.57E-05 | 0        | 0 | 0.001216 | 0.000526 | 0 | 0 | 0 |
| 0 | 0        | 0        | 0 | 0.009534 | 0        | 0 | 0 | 0 |
| 0 | 0        | 0        | 0 | 9.86E-05 | 0        | 0 | 0 | 0 |
| 0 | 0        | 0        | 0 | 0.000164 | 0        | 0 | 0 | 0 |
| 0 | 0        | 0        | 0 | 0.000164 | 0        | 0 | 0 | 0 |
| 0 | 0        | 0        | 0 | 0        | 0        | 0 | 0 | 0 |
| 0 | 0        | 0        | 0 | 0        | 0        | 0 | 0 | 0 |
| 0 | 0        | 0        | 0 | 3.29E-05 | 6.57E-05 | 0 | 0 | 0 |
| 0 | 0        | 0        | 0 | 0        | 0        | 0 | 0 | 0 |
| 0 | 0        | 0        | 0 | 0        | 0        | 0 | 0 | 0 |
| 0 | 0        | 0        | 0 | 0        | 0        | 0 | 0 | 0 |
| 0 | 0        | 0        | 0 | 0        | 0        | 0 | 0 | 0 |
| 0 | 0        | 0        | 0 | 0        | 0        | 0 | 0 | 0 |
| 0 | 0        | 0        | 0 | 0        | 0        | 0 | 0 | 0 |
| 0 | 0        | 0        | 0 | 0        | 0        | 0 | 0 | 0 |
| 0 | 0        | 0        | 0 | 0        | 0        | 0 | 0 | 0 |
| 0 | 0.001414 | 0.000789 | 0 | 0.004635 | 0.002104 | 0 | 0 | 0 |
| 0 | 3.29E-05 | 0        | 0 | 0.045597 | 3.29E-05 | 0 | 0 | 0 |

|          |          |          |   |          |          |          |          |   |
|----------|----------|----------|---|----------|----------|----------|----------|---|
| 0        | 0        | 0        | 0 | 0.00023  | 0        | 0        | 0        | 0 |
| 0        | 0        | 0        | 0 | 9.86E-05 | 0        | 0        | 0        | 0 |
| 0        | 0        | 0        | 0 | 0.000197 | 0        | 0        | 0        | 0 |
| 0        | 0        | 0        | 0 | 0.000164 | 0        | 0        | 0        | 0 |
| 0        | 0        | 0        | 0 | 0        | 0        | 0        | 0        | 0 |
| 0        | 0        | 0        | 0 | 0        | 0        | 0        | 0        | 0 |
| 0        | 0        | 3.29E-05 | 0 | 0        | 6.57E-05 | 0        | 0        | 0 |
| 0        | 9.86E-05 | 0.00046  | 0 | 0        | 0        | 0        | 0        | 0 |
| 0        | 0.000263 | 0        | 0 | 0        | 0        | 0        | 0        | 0 |
| 0        | 0        | 0        | 0 | 0.002038 | 0        | 0        | 0        | 0 |
| 3.29E-05 | 0.00023  | 9.86E-05 | 0 | 0        | 0        | 0        | 0        | 0 |
| 0        | 9.86E-05 | 0        | 0 | 0        | 0        | 0        | 0        | 0 |
| 0        | 0        | 0        | 0 | 0        | 0        | 0.000131 | 0        | 0 |
| 0        | 0        | 0        | 0 | 0        | 0        | 0        | 0        | 0 |
| 0        | 0        | 0        | 0 | 3.29E-05 | 0        | 0        | 0        | 0 |
| 0        | 0        | 0.000131 | 0 | 0        | 0        | 0        | 0        | 0 |
| 0        | 0        | 0        | 0 | 0        | 0        | 0        | 0        | 0 |
| 0        | 0        | 0        | 0 | 0        | 0        | 0        | 0        | 0 |
| 0        | 0        | 0        | 0 | 0        | 0        | 0        | 0        | 0 |
| 0        | 0        | 0        | 0 | 0        | 0        | 0        | 0        | 0 |
| 0        | 0        | 0        | 0 | 0        | 0        | 0        | 0        | 0 |
| 0        | 0        | 0        | 0 | 0        | 0        | 0        | 0        | 0 |
| 0        | 0        | 0        | 0 | 0        | 0        | 0        | 0        | 0 |
| 0        | 0        | 0        | 0 | 0        | 0        | 0        | 0        | 0 |
| 0        | 0        | 0        | 0 | 0        | 0        | 0        | 0        | 0 |
| 0        | 0        | 0        | 0 | 0        | 0        | 0        | 0        | 0 |
| 0        | 3.29E-05 | 0        | 0 | 0.000789 | 0.000296 | 0        | 0        | 0 |
| 0        | 0        | 0        | 0 | 0.000723 | 0        | 0        | 0        | 0 |
| 0        | 0        | 0        | 0 | 6.57E-05 | 0        | 0        | 0        | 0 |
| 0        | 0.000164 | 0        | 0 | 0.000131 | 0        | 0        | 0        | 0 |
| 0        | 0        | 0        | 0 | 0.001446 | 0        | 0        | 0        | 0 |
| 0        | 0        | 0        | 0 | 0.000164 | 0        | 0        | 0        | 0 |
| 0        | 0        | 0        | 0 | 0.000131 | 0        | 0        | 0        | 0 |
| 0        | 0        | 0        | 0 | 0.000164 | 0        | 0        | 0        | 0 |
| 0        | 0        | 0        | 0 | 9.86E-05 | 0        | 0        | 0        | 0 |
| 0        | 0        | 0        | 0 | 6.57E-05 | 0        | 0        | 0        | 0 |
| 0        | 0        | 0        | 0 | 0.000131 | 0        | 0        | 0        | 0 |
| 0        | 0        | 0        | 0 | 0        | 0        | 0        | 0        | 0 |
| 0        | 0        | 0        | 0 | 0.001775 | 0        | 0        | 0        | 0 |
| 0        | 0        | 0        | 0 | 0.000394 | 0        | 0        | 0        | 0 |
| 0        | 0        | 0        | 0 | 0.00046  | 0        | 0        | 0        | 0 |
| 0        | 0        | 0        | 0 | 0.000657 | 0        | 0        | 0        | 0 |
| 0        | 0        | 0        | 0 | 0.011637 | 0        | 0        | 0        | 0 |
| 0        | 0        | 0        | 0 | 0.004668 | 3.29E-05 | 0        | 9.86E-05 | 0 |
| 0        | 0        | 0        | 0 | 0.000131 | 0        | 0        | 0        | 0 |
| 0        | 0        | 0        | 0 | 0.003518 | 0.000197 | 0        | 0        | 0 |
| 0        | 0        | 0        | 0 | 0.006641 | 3.29E-05 | 0        | 0        | 0 |
| 0        | 3.29E-05 | 6.57E-05 | 0 | 0.000657 | 0.000131 | 0        | 0        | 0 |
| 0        | 0        | 0        | 0 | 6.57E-05 | 0        | 0        | 0        | 0 |



|   |          |   |   |          |          |   |   |   |
|---|----------|---|---|----------|----------|---|---|---|
| 0 | 0        | 0 | 0 | 0.000888 | 0.00023  | 0 | 0 | 0 |
| 0 | 0        | 0 | 0 | 0.000131 | 0        | 0 | 0 | 0 |
| 0 | 0        | 0 | 0 | 0        | 0        | 0 | 0 | 0 |
| 0 | 0        | 0 | 0 | 0        | 0        | 0 | 0 | 0 |
| 0 | 0        | 0 | 0 | 0.000493 | 0        | 0 | 0 | 0 |
| 0 | 0        | 0 | 0 | 0.001414 | 0        | 0 | 0 | 0 |
| 0 | 6.57E-05 | 0 | 0 | 0.003616 | 0.00023  | 0 | 0 | 0 |
| 0 | 6.57E-05 | 0 | 0 | 0.003024 | 0.000296 | 0 | 0 | 0 |
| 0 | 0        | 0 | 0 | 0.000362 | 3.29E-05 | 0 | 0 | 0 |
| 0 | 0        | 0 | 0 | 0.001151 | 9.86E-05 | 0 | 0 | 0 |
| 0 | 0        | 0 | 0 | 9.86E-05 | 0        | 0 | 0 | 0 |
| 0 | 0        | 0 | 0 | 0.000493 | 6.57E-05 | 0 | 0 | 0 |
| 0 | 0        | 0 | 0 | 6.57E-05 | 0        | 0 | 0 | 0 |
| 0 | 0        | 0 | 0 | 3.29E-05 | 0        | 0 | 0 | 0 |
| 0 | 0        | 0 | 0 | 0.000756 | 0        | 0 | 0 | 0 |
| 0 | 0        | 0 | 0 | 0.000362 | 0        | 0 | 0 | 0 |
| 0 | 0        | 0 | 0 | 0        | 0        | 0 | 0 | 0 |
| 0 | 0        | 0 | 0 | 0.00046  | 0        | 0 | 0 | 0 |
| 0 | 0        | 0 | 0 | 3.29E-05 | 0        | 0 | 0 | 0 |
| 0 | 0        | 0 | 0 | 3.29E-05 | 0        | 0 | 0 | 0 |
| 0 | 6.57E-05 | 0 | 0 | 0.001249 | 0.00023  | 0 | 0 | 0 |
| 0 | 3.29E-05 | 0 | 0 | 0.000657 | 0        | 0 | 0 | 0 |
| 0 | 0        | 0 | 0 | 3.29E-05 | 0        | 0 | 0 | 0 |

| k_Bacteri |
|-----------|-----------|-----------|-----------|-----------|-----------|-----------|-----------|-----------|
| 0.000394  | 0         | 0         | 0         | 0         | 0.000986  | 0         | 0         | 0         |
| 0.000756  | 0         | 0         | 0         | 0         | 0.000131  | 0         | 0         | 0         |
| 3.29E-05  | 0         | 0         | 0         | 0         | 0.000329  | 0         | 0         | 0         |
| 9.86E-05  | 0         | 0         | 0         | 0         | 0.00046   | 0         | 3.29E-05  | 0         |
| 0         | 0         | 0         | 0         | 0         | 0.000427  | 0         | 9.86E-05  | 0         |
| 0         | 0         | 0         | 0         | 0         | 0.000131  | 0         | 0         | 0         |
| 0         | 0         | 0         | 0         | 0         | 0.000756  | 0         | 0.000131  | 0         |
| 0         | 0         | 0         | 0         | 0         | 0.00023   | 0         | 0         | 0         |
| 0.000592  | 0         | 0         | 0         | 0         | 0.001677  | 0         | 0         | 0         |
| 6.57E-05  | 0         | 0         | 0         | 0         | 0.004142  | 0         | 0         | 0         |
| 0.000197  | 0         | 0         | 0         | 0         | 0.000493  | 0         | 3.29E-05  | 0         |
| 0.000329  | 0         | 0         | 0         | 0         | 0.000427  | 0         | 0.001742  | 0         |
| 0.010947  | 0         | 0.000164  | 0         | 0         | 0.000263  | 0         | 0.00286   | 0         |
| 0.002893  | 0         | 6.57E-05  | 0         | 0         | 0.006871  | 0         | 0         | 0         |
| 0.000953  | 0         | 3.29E-05  | 0         | 0         | 0.004438  | 0         | 0.000263  | 0         |
| 0         | 0         | 0         | 0         | 0         | 9.86E-05  | 0         | 0         | 0         |
| 0         | 0         | 0         | 0         | 0         | 0.001019  | 0         | 0         | 0         |
| 0.000296  | 0         | 0         | 0         | 0         | 3.29E-05  | 0         | 3.29E-05  | 0         |
| 0         | 0         | 0         | 0         | 0         | 0.000164  | 0         | 0         | 0         |
| 0.000164  | 0         | 0         | 0         | 0         | 9.86E-05  | 0         | 0         | 0         |
| 0.001183  | 0         | 3.29E-05  | 0         | 0         | 0         | 0         | 9.86E-05  | 0         |
| 0.00023   | 0         | 0         | 0         | 0         | 0.000164  | 0         | 0.003616  | 0         |
| 0.000789  | 0         | 0         | 0         | 0         | 0         | 0         | 9.86E-05  | 0         |
| 0         | 0         | 0         | 0         | 0         | 0         | 0         | 0.000723  | 0         |
| 0         | 0         | 0         | 0         | 0         | 0         | 0         | 0.001019  | 0         |
| 0         | 0         | 0         | 0         | 0         | 0         | 0         | 0.001085  | 0         |
| 6.57E-05  | 0         | 0         | 0         | 0         | 0         | 0         | 0.000427  | 0         |
| 0         | 0         | 0         | 0         | 0         | 0.006476  | 0         | 0.000362  | 0         |
| 0.000526  | 0         | 6.57E-05  | 0         | 0         | 0.032907  | 0         | 0.001085  | 0         |
| 0.000559  | 0         | 0         | 0         | 0         | 0.004307  | 3.29E-05  | 0.002104  | 0         |
| 0         | 6.57E-05  | 0         | 0         | 0         | 0.004405  | 0         | 0.001677  | 0         |
| 0.000394  | 0         | 0         | 0         | 0         | 0.003912  | 0         | 0.000723  | 0         |
| 0.000131  | 0         | 0         | 0         | 0         | 0.024294  | 0         | 0.001315  | 0         |
| 0         | 0.00046   | 0         | 0         | 0         | 0.032217  | 0         | 0.00194   | 0         |
| 0         | 0         | 0         | 0         | 0         | 0.004175  | 0         | 0.015122  | 0         |
| 0         | 0         | 0         | 0         | 0         | 0.038627  | 0         | 0.009238  | 0         |
| 0.000888  | 3.29E-05  | 0         | 0         | 0         | 0.004109  | 0.002564  | 0.003419  | 0         |
| 0.000394  | 0         | 0         | 0         | 0         | 0.008021  | 0         | 0.004044  | 0         |
| 0         | 0.000394  | 0         | 0         | 0         | 0.053453  | 0.010421  | 0.00194   | 0         |
| 0         | 9.86E-05  | 0         | 0         | 0         | 0.011111  | 0.00092   | 0.009369  | 0         |
| 0         | 6.57E-05  | 0         | 0         | 0         | 0.015385  | 0.004537  | 0.006706  | 0         |
| 0         | 6.57E-05  | 0         | 0         | 0         | 0.001742  | 0.00194   | 0.004142  | 0         |
| 0.0024    | 0         | 0         | 0         | 0         | 0.002301  | 0.001381  | 0.004208  | 0         |
| 0         | 0         | 0         | 0         | 0         | 0.00023   | 0         | 0.006082  | 0         |

|          |          |          |   |   |          |          |          |          |
|----------|----------|----------|---|---|----------|----------|----------|----------|
| 6.57E-05 | 6.57E-05 | 0        | 0 | 0 | 0.009632 | 0        | 0.014235 | 0        |
| 0.000329 | 0        | 0        | 0 | 0 | 0.001348 | 0        | 0.016141 | 0        |
| 9.86E-05 | 0        | 0        | 0 | 0 | 0.001019 | 0        | 0.012262 | 0        |
| 0.000164 | 9.86E-05 | 0        | 0 | 0 | 0.002498 | 0        | 0.016536 | 0        |
| 0        | 0        | 0        | 0 | 0 | 0.000197 | 0        | 0.00309  | 0        |
| 0        | 3.29E-05 | 0        | 0 | 0 | 0        | 0        | 0.00194  | 0        |
| 0        | 0        | 0        | 0 | 0 | 0.000131 | 0        | 0.001019 | 0        |
| 6.57E-05 | 0        | 0        | 0 | 0 | 6.57E-05 | 0        | 0.005194 | 0        |
| 0        | 0        | 0        | 0 | 0 | 0.00618  | 0        | 0.011506 | 0        |
| 0        | 3.29E-05 | 0        | 0 | 0 | 0        | 0        | 0.000592 | 0        |
| 0.006147 | 0        | 6.57E-05 | 0 | 0 | 0.000493 | 0        | 3.29E-05 | 0        |
| 0        | 0        | 0        | 0 | 0 | 0        | 0        | 0        | 0        |
| 0        | 0        | 0        | 0 | 0 | 0        | 0        | 0        | 0        |
| 9.86E-05 | 0        | 3.29E-05 | 0 | 0 | 3.29E-05 | 0        | 0        | 0        |
| 0        | 0        | 0        | 0 | 0 | 0.009205 | 0.00743  | 0.030967 | 0        |
| 0        | 0        | 0        | 0 | 0 | 0.004405 | 0.001446 | 0.004635 | 0        |
| 0        | 0        | 0        | 0 | 0 | 0.001216 | 0.000723 | 0.01029  | 0        |
| 0        | 0        | 0        | 0 | 0 | 0        | 0        | 0        | 0        |
| 0        | 0        | 0        | 0 | 0 | 0        | 0        | 0.001019 | 0        |
| 0.00023  | 0        | 0        | 0 | 0 | 6.57E-05 | 0        | 0.012952 | 0        |
| 0.002926 | 0        | 9.86E-05 | 0 | 0 | 0        | 0        | 0.00046  | 0        |
| 0        | 0        | 0        | 0 | 0 | 6.57E-05 | 0        | 0        | 0        |
| 0        | 0        | 0        | 0 | 0 | 3.29E-05 | 3.29E-05 | 9.86E-05 | 0        |
| 0        | 0        | 0        | 0 | 0 | 6.57E-05 | 0        | 3.29E-05 | 0        |
| 0.000855 | 0        | 0        | 0 | 0 | 0.003945 | 0        | 0.000986 | 0.000362 |
| 0        | 0        | 0        | 0 | 0 | 0.000164 | 0        | 0.000394 | 0        |
| 0        | 0        | 0        | 0 | 0 | 0.000131 | 0        | 0.000164 | 0.001282 |
| 0        | 0        | 0        | 0 | 0 | 0        | 0        | 0.000164 | 0        |
| 0.000164 | 0        | 0        | 0 | 0 | 0.004471 | 0        | 0.002203 | 0.002696 |
| 0        | 0        | 0        | 0 | 0 | 0.000888 | 0        | 0.001019 | 9.86E-05 |
| 6.57E-05 | 0        | 0        | 0 | 0 | 0.004865 | 0        | 0.021565 | 0        |
| 9.86E-05 | 0        | 0        | 0 | 0 | 0.001611 | 6.57E-05 | 0.012657 | 0        |
| 0.000855 | 0        | 0        | 0 | 0 | 3.29E-05 | 0        | 0.000362 | 0        |
| 0        | 6.57E-05 | 0        | 0 | 0 | 0.003189 | 0        | 0.035373 | 0        |
| 6.57E-05 | 0.000131 | 0        | 0 | 0 | 0.002729 | 0        | 0.010881 | 0        |
| 0.000362 | 0        | 0        | 0 | 0 | 0.014432 | 0        | 0.069134 | 0        |
| 0        | 0        | 0        | 0 | 0 | 0.001085 | 3.29E-05 | 0.004208 | 0        |
| 0.029587 | 0        | 9.86E-05 | 0 | 0 | 0        | 0        | 0        | 0        |
| 0        | 0        | 0        | 0 | 0 | 0.003189 | 0        | 0.006049 | 0        |
| 0.001249 | 0        | 0        | 0 | 0 | 0.003518 | 0        | 0.002926 | 0        |
| 0.00069  | 0.000164 | 0        | 0 | 0 | 0.001315 | 0        | 0.006739 | 0        |
| 0.000394 | 0        | 0        | 0 | 0 | 0.011276 | 0        | 0.048128 | 0        |
| 9.86E-05 | 3.29E-05 | 0        | 0 | 0 | 0.001808 | 0        | 0.008383 | 0        |
| 0.032578 | 0        | 0.000329 | 0 | 0 | 3.29E-05 | 0        | 0.001512 | 0        |
| 0        | 0        | 0        | 0 | 0 | 0        | 0        | 6.57E-05 | 0        |
| 0        | 0        | 0        | 0 | 0 | 0.006509 | 0        | 0.002334 | 0        |
| 0        | 0        | 0        | 0 | 0 | 0.000164 | 0        | 6.57E-05 | 0        |



|          |          |          |   |   |          |          |          |   |
|----------|----------|----------|---|---|----------|----------|----------|---|
| 0        | 6.57E-05 | 0        | 0 | 0 | 6.57E-05 | 0        | 6.57E-05 | 0 |
| 0        | 6.57E-05 | 0        | 0 | 0 | 0.001775 | 0        | 0.001446 | 0 |
| 0        | 0        | 0        | 0 | 0 | 9.86E-05 | 0        | 0.001282 | 0 |
| 0        | 3.29E-05 | 0        | 0 | 0 | 0.00194  | 0.000329 | 0.003057 | 0 |
| 0        | 0        | 0        | 0 | 0 | 9.86E-05 | 0        | 0.001841 | 0 |
| 0.000263 | 0        | 0        | 0 | 0 | 0        | 0        | 0.000986 | 0 |
| 0        | 0        | 0        | 0 | 0 | 0        | 0        | 0.000263 | 0 |
| 0        | 0        | 0        | 0 | 0 | 0        | 0        | 0.000986 | 0 |
| 0        | 0        | 0        | 0 | 0 | 0        | 0        | 0.002564 | 0 |
| 0        | 0        | 0        | 0 | 0 | 0.001282 | 0        | 0.018475 | 0 |
| 6.57E-05 | 0        | 0        | 0 | 0 | 0.003287 | 0        | 0.029422 | 0 |
| 0        | 0        | 0        | 0 | 0 | 0.000756 | 0        | 0.015418 | 0 |
| 0.004073 | 0        | 0        | 0 | 0 | 0.001264 | 0        | 0.000211 | 0 |
| 0.000329 | 0        | 0        | 0 | 0 | 0.002893 | 0        | 0.00069  | 0 |
| 0.000592 | 0        | 3.29E-05 | 0 | 0 | 0.000131 | 0        | 3.29E-05 | 0 |
| 0.002137 | 0        | 0        | 0 | 0 | 0.000427 | 0        | 3.29E-05 | 0 |
| 0        | 0        | 0        | 0 | 0 | 3.29E-05 | 0        | 0.000493 | 0 |
| 0        | 0        | 0        | 0 | 0 | 0.00092  | 0        | 0.000296 | 0 |
| 0        | 0        | 0        | 0 | 0 | 0        | 0        | 0        | 0 |
| 0.00092  | 0        | 0        | 0 | 0 | 6.57E-05 | 0        | 0        | 0 |
| 0.000164 | 0        | 0        | 0 | 0 | 0.000164 | 0        | 9.86E-05 | 0 |
| 0.000131 | 6.57E-05 | 3.29E-05 | 0 | 0 | 0.009895 | 0.002696 | 0.028962 | 0 |
| 3.29E-05 | 3.29E-05 | 0        | 0 | 0 | 0.003452 | 0.001085 | 0.041783 | 0 |
| 0        | 0        | 0        | 0 | 0 | 0.00572  | 0.001709 | 0.021631 | 0 |
| 0.000131 | 0        | 0        | 0 | 0 | 0.001972 | 0.001545 | 0.008975 | 0 |
| 0        | 3.29E-05 | 0        | 0 | 0 | 0.009402 | 0.001775 | 0.036359 | 0 |
| 0        | 0        | 0        | 0 | 0 | 0.000888 | 0.000296 | 0.006115 | 0 |
| 0        | 3.29E-05 | 0        | 0 | 0 | 0.002433 | 0.000394 | 0.096091 | 0 |
| 3.29E-05 | 0        | 0        | 0 | 0 | 0.000164 | 3.29E-05 | 0.000559 | 0 |
| 0.000131 | 0        | 0        | 0 | 0 | 0.00046  | 0.00023  | 0.001348 | 0 |
| 0        | 0        | 0        | 0 | 0 | 0.000164 | 6.57E-05 | 0.001841 | 0 |
| 0        | 0        | 0        | 0 | 0 | 0.004011 | 0.001479 | 0.014695 | 0 |
| 0.000197 | 0        | 0        | 0 | 0 | 0.000263 | 0        | 0.002531 | 0 |
| 0.000197 | 0        | 0        | 0 | 0 | 0.003813 | 0        | 0.020185 | 0 |
| 0        | 3.29E-05 | 0        | 0 | 0 | 0.007758 | 0        | 0.030606 | 0 |
| 0        | 3.29E-05 | 0        | 0 | 0 | 0.003353 | 0        | 0.009895 | 0 |
| 3.29E-05 | 0        | 0        | 0 | 0 | 0.003255 | 0        | 0.018508 | 0 |
| 3.29E-05 | 0        | 0        | 0 | 0 | 0.002268 | 0        | 0.004109 | 0 |
| 0        | 9.86E-05 | 0        | 0 | 0 | 0.005523 | 0        | 0.003945 | 0 |
| 0        | 9.86E-05 | 0        | 0 | 0 | 0.003353 | 0        | 0.009731 | 0 |
| 0.00194  | 0        | 0        | 0 | 0 | 0.018311 | 0        | 0.073408 | 0 |
| 0.002564 | 3.29E-05 | 0        | 0 | 0 | 0.017456 | 0.000197 | 0.060357 | 0 |
| 3.29E-05 | 0        | 0        | 0 | 0 | 0.00263  | 0        | 0.008942 | 0 |
| 9.86E-05 | 0        | 0        | 0 | 0 | 0.001841 | 0        | 0.011736 | 0 |
| 0.000131 | 0        | 0        | 0 | 0 | 0.004931 | 0        | 0.051711 | 0 |
| 3.29E-05 | 9.86E-05 | 0        | 0 | 0 | 0.002597 | 0        | 0.022552 | 0 |
| 6.57E-05 | 3.29E-05 | 0        | 0 | 0 | 0.005884 | 0        | 0.007462 | 0 |

|          |          |          |   |   |          |          |          |   |
|----------|----------|----------|---|---|----------|----------|----------|---|
| 3.29E-05 | 3.29E-05 | 0        | 0 | 0 | 0.003123 | 0        | 0.019823 | 0 |
| 0        | 0        | 0        | 0 | 0 | 0.000394 | 0        | 0.004504 | 0 |
| 0        | 9.86E-05 | 0        | 0 | 0 | 0.002301 | 0        | 0.026628 | 0 |
| 0        | 3.29E-05 | 0        | 0 | 0 | 0.000789 | 0        | 0.014465 | 0 |
| 0        | 0        | 0        | 0 | 0 | 0.000756 | 0        | 0.005424 | 0 |
| 0.000427 | 0        | 0        | 0 | 0 | 0        | 0        | 0.019757 | 0 |
| 0        | 0        | 0        | 0 | 0 | 6.57E-05 | 0        | 0.006246 | 0 |
| 0.000296 | 0        | 0        | 0 | 0 | 0        | 0        | 0.002071 | 0 |
| 0        | 0        | 0        | 0 | 0 | 0        | 0        | 0.002433 | 0 |
| 0.000164 | 0        | 0        | 0 | 0 | 0        | 0        | 0.012854 | 0 |
| 0        | 0        | 0        | 0 | 0 | 0        | 0        | 0.00023  | 0 |
| 0.025642 | 0        | 0.000394 | 0 | 0 | 0        | 0        | 6.57E-05 | 0 |
| 0        | 0        | 0        | 0 | 0 | 0        | 0        | 0.001249 | 0 |
| 0.002367 | 0        | 0        | 0 | 0 | 0        | 0        | 0.002038 | 0 |
| 0.001644 | 0        | 0        | 0 | 0 | 0        | 0        | 0.001019 | 0 |
| 0        | 0        | 0        | 0 | 0 | 3.29E-05 | 0        | 0.002334 | 0 |
| 0        | 0        | 0        | 0 | 0 | 3.29E-05 | 0        | 0.000164 | 0 |
| 0        | 0        | 0        | 0 | 0 | 6.57E-05 | 0        | 0.001118 | 0 |
| 0.000953 | 0        | 0        | 0 | 0 | 0        | 0        | 0.001414 | 0 |
| 0        | 0        | 0        | 0 | 0 | 0.000197 | 0        | 0.001907 | 0 |
| 0.002071 | 0        | 3.29E-05 | 0 | 0 | 0        | 0        | 0.001446 | 0 |
| 0.000164 | 0        | 0        | 0 | 0 | 0.00023  | 0        | 0.000394 | 0 |
| 0.000723 | 0.000131 | 0        | 0 | 0 | 0.007364 | 0        | 0.003255 | 0 |
| 0        | 9.86E-05 | 0        | 0 | 0 | 0.003452 | 0.000329 | 0.007923 | 0 |
| 0.000625 | 0        | 0        | 0 | 0 | 0.009731 | 0        | 0.005358 | 0 |
| 0.000592 | 0        | 0        | 0 | 0 | 0.001545 | 0        | 0.005293 | 0 |
| 0.001019 | 0        | 0        | 0 | 0 | 0.001874 | 0        | 0.02219  | 0 |
| 0.004339 | 0        | 0        | 0 | 0 | 0.002071 | 0        | 0.015648 | 0 |
| 0.00641  | 0        | 3.29E-05 | 0 | 0 | 0.003024 | 0        | 0.013906 | 0 |
| 0.00194  | 0        | 0        | 0 | 0 | 0.001348 | 0.000197 | 0.003945 | 0 |
| 0.000625 | 0        | 0        | 0 | 0 | 0.002926 | 0        | 0.004537 | 0 |
| 3.29E-05 | 0        | 0        | 0 | 0 | 0.002827 | 3.29E-05 | 0.0119   | 0 |
| 0.01601  | 0        | 0.000131 | 0 | 0 | 0.009205 | 0        | 0.06394  | 0 |
| 0.000592 | 0        | 0        | 0 | 0 | 0.022124 | 0.013446 | 0.005424 | 0 |
| 0        | 0        | 0        | 0 | 0 | 0.002696 | 0        | 0.004274 | 0 |
| 0        | 0        | 0        | 0 | 0 | 0.00641  | 0        | 0.026069 | 0 |
| 0        | 0        | 0        | 0 | 0 | 0.001907 | 0        | 0.008712 | 0 |
| 0.001249 | 0        | 0        | 0 | 0 | 0.01006  | 3.29E-05 | 0.027614 | 0 |
| 9.86E-05 | 0        | 0        | 0 | 0 | 6.57E-05 | 0        | 0.007199 | 0 |
| 0        | 0        | 0        | 0 | 0 | 0.000164 | 0        | 0.009632 | 0 |
| 3.29E-05 | 0        | 0        | 0 | 0 | 0.000789 | 0        | 0.012163 | 0 |
| 0.000197 | 0        | 3.29E-05 | 0 | 0 | 0.000329 | 0        | 0.00595  | 0 |
| 0        | 6.57E-05 | 0        | 0 | 0 | 0        | 0        | 0.001052 | 0 |
| 0        | 9.86E-05 | 0        | 0 | 0 | 0        | 0        | 0.017292 | 0 |
| 0        | 0        | 0        | 0 | 0 | 0.00023  | 0        | 0.012196 | 0 |
| 0        | 0        | 0        | 0 | 0 | 0        | 0        | 6.57E-05 | 0 |
| 0.000953 | 0        | 0        | 0 | 0 | 9.86E-05 | 0        | 0.000131 | 0 |

|          |          |          |   |   |          |          |          |          |
|----------|----------|----------|---|---|----------|----------|----------|----------|
| 0        | 0        | 0        | 0 | 0 | 0.001085 | 3.29E-05 | 6.57E-05 | 0        |
| 0        | 0        | 0        | 0 | 0 | 0        | 0        | 0        | 0        |
| 0.006575 | 0        | 6.57E-05 | 0 | 0 | 0.000657 | 0        | 0        | 0        |
| 3.29E-05 | 0        | 0        | 0 | 0 | 6.57E-05 | 0        | 0.000131 | 0        |
| 0        | 0        | 0        | 0 | 0 | 0.000164 | 0        | 0        | 0        |
| 0.000559 | 0        | 0        | 0 | 0 | 0.000756 | 0        | 0.00503  | 0        |
| 3.29E-05 | 0        | 0        | 0 | 0 | 0.000296 | 0        | 0.000855 | 0        |
| 3.29E-05 | 0        | 0        | 0 | 0 | 0.000131 | 9.86E-05 | 0.000592 | 0        |
| 0        | 3.29E-05 | 0        | 0 | 0 | 0.000592 | 0        | 0.002137 | 0        |
| 0        | 0        | 0        | 0 | 0 | 0.001709 | 0        | 0.00309  | 0        |
| 0.000986 | 0        | 0        | 0 | 0 | 0.000822 | 0        | 0.001446 | 0        |
| 0.00046  | 0        | 0        | 0 | 0 | 0.009336 | 0        | 0.018212 | 0.000394 |
| 0        | 0        | 0        | 0 | 0 | 0.002794 | 0        | 0.002564 | 0.003419 |
| 3.29E-05 | 0        | 0        | 0 | 0 | 0.013248 | 0        | 0.005687 | 0        |
| 6.57E-05 | 0.000164 | 3.29E-05 | 0 | 0 | 0.019034 | 0        | 0.017522 | 0        |
| 0.00263  | 0        | 0        | 0 | 0 | 0.000164 | 0        | 0.002466 | 0        |
| 0.001052 | 0        | 0        | 0 | 0 | 0        | 0        | 3.29E-05 | 0        |
| 0.000789 | 0        | 0        | 0 | 0 | 0        | 0        | 0        | 0        |
| 0.000197 | 0        | 0        | 0 | 0 | 0        | 0        | 0        | 0        |
| 0.001446 | 0        | 0        | 0 | 0 | 0        | 0        | 3.29E-05 | 0        |
| 0.000296 | 0        | 0        | 0 | 0 | 0.001118 | 0        | 0        | 0        |
| 0.001183 | 0        | 0        | 0 | 0 | 0.007167 | 0        | 0        | 0        |
| 0        | 0        | 0        | 0 | 0 | 0.000888 | 0        | 0.002696 | 0        |
| 0        | 0        | 0        | 0 | 0 | 0.000263 | 0        | 0.000888 | 0        |
| 0.001019 | 3.29E-05 | 0        | 0 | 0 | 0.002137 | 0        | 0.009336 | 0        |
| 0.006279 | 0        | 6.57E-05 | 0 | 0 | 0.00595  | 0        | 0.026661 | 0        |
| 0.002926 | 0        | 0        | 0 | 0 | 0.004011 | 0        | 0.003485 | 0        |
| 6.57E-05 | 0        | 0        | 0 | 0 | 0.005917 | 0.000789 | 0.005227 | 0        |
| 0        | 0        | 0        | 0 | 0 | 0.002729 | 0        | 0.024294 | 0        |
| 0.000164 | 0        | 0        | 0 | 0 | 0.000855 | 0        | 0.006213 | 0        |
| 0.000197 | 6.57E-05 | 0        | 0 | 0 | 0.00069  | 0.00023  | 0.009271 | 0        |
| 6.57E-05 | 0        | 0        | 0 | 0 | 0        | 0        | 0.000131 | 0        |
| 0        | 0        | 0        | 0 | 0 | 0.000131 | 0        | 0.002893 | 0        |
| 0.000131 | 0        | 0        | 0 | 0 | 0.000559 | 0        | 0.004504 | 0        |
| 0.000756 | 0        | 0        | 0 | 0 | 0.003846 | 0        | 0.01739  | 0        |
| 0.000493 | 0        | 0        | 0 | 0 | 0.007495 | 0        | 0.02814  | 0        |
| 0.001151 | 6.57E-05 | 3.29E-05 | 0 | 0 | 0.001742 | 0        | 0.038298 | 0        |
| 3.29E-05 | 0        | 0        | 0 | 0 | 0.013446 | 0        | 0.054177 | 0        |
| 0.000362 | 0        | 0        | 0 | 0 | 0.003024 | 0        | 0.010881 | 0        |
| 0.000131 | 0.000329 | 0        | 0 | 0 | 0.003156 | 0        | 0.014761 | 0        |
| 0        | 6.57E-05 | 0        | 0 | 0 | 0.002005 | 0        | 0.003813 | 0        |
| 0        | 0        | 0        | 0 | 0 | 0.075775 | 0        | 0.006772 | 0        |
| 0        | 9.86E-05 | 0        | 0 | 0 | 0.011342 | 0        | 0.019725 | 0        |
| 0        | 6.57E-05 | 0        | 0 | 0 | 0.013084 | 0        | 0.040797 | 0        |
| 0        | 3.29E-05 | 0        | 0 | 0 | 0.007397 | 0        | 0.018574 | 0        |
| 0.000526 | 0        | 3.29E-05 | 0 | 0 | 0.008021 | 0        | 0.018705 | 0        |
| 0.00457  | 0        | 0        | 0 | 0 | 0.011276 | 0        | 0.008054 | 0        |

|          |          |          |   |   |          |          |          |   |
|----------|----------|----------|---|---|----------|----------|----------|---|
| 0.001479 | 0        | 0        | 0 | 0 | 0.003748 | 0        | 0.006246 | 0 |
| 0.000197 | 0        | 0        | 0 | 0 | 0.00092  | 0        | 0.004701 | 0 |
| 0        | 0        | 0        | 0 | 0 | 0.003682 | 0        | 0.010618 | 0 |
| 3.29E-05 | 0        | 0        | 0 | 0 | 0.000131 | 0        | 0        | 0 |
| 0.00092  | 0        | 0        | 0 | 0 | 0.000263 | 0        | 0.001414 | 0 |
| 0.004767 | 0        | 6.57E-05 | 0 | 0 | 6.57E-05 | 0        | 0.000197 | 0 |
| 0        | 0        | 0        | 0 | 0 | 0.00457  | 0.000657 | 0.010027 | 0 |
| 0.000362 | 0        | 0        | 0 | 0 | 0        | 0        | 0        | 0 |
| 0        | 0        | 0        | 0 | 0 | 0        | 0        | 0.000263 | 0 |
| 0        | 0        | 0        | 0 | 0 | 0.000756 | 0        | 0.009303 | 0 |
| 0.000789 | 0        | 0        | 0 | 0 | 0.000296 | 0        | 0        | 0 |
| 0        | 0        | 0        | 0 | 0 | 0.00618  | 0.002597 | 0.007528 | 0 |
| 0.007594 | 0        | 6.57E-05 | 0 | 0 | 0        | 0        | 0.000625 | 0 |
| 0.000197 | 0        | 0        | 0 | 0 | 0.002367 | 0        | 0.002959 | 0 |
| 0.000526 | 0        | 0        | 0 | 0 | 0.012426 | 0.011342 | 0.03008  | 0 |
| 0.000131 | 3.29E-05 | 0        | 0 | 0 | 0.012689 | 0.003452 | 0.058516 | 0 |
| 0        | 0.000131 | 0        | 0 | 0 | 0.003419 | 0.001118 | 0.019626 | 0 |
| 9.86E-05 | 0        | 0        | 0 | 0 | 0.004175 | 0.001808 | 0.009271 | 0 |
| 0.000131 | 0.000131 | 0        | 0 | 0 | 0.003057 | 0.003452 | 0.008021 | 0 |
| 0        | 3.29E-05 | 0        | 0 | 0 | 0.008416 | 0.00194  | 0.040764 | 0 |
| 0        | 0        | 0        | 0 | 0 | 0.006871 | 0.004931 | 0.037345 | 0 |
| 0        | 0        | 0        | 0 | 0 | 0.003353 | 0.003222 | 0.023571 | 0 |
| 9.86E-05 | 0        | 0        | 0 | 0 | 3.29E-05 | 6.57E-05 | 0.006016 | 0 |
| 0.000362 | 0        | 0        | 0 | 0 | 0.002531 | 0.000657 | 0.024491 | 0 |
| 0        | 0        | 0        | 0 | 0 | 0        | 0        | 3.29E-05 | 0 |
| 0.000296 | 0        | 0        | 0 | 0 | 6.57E-05 | 0        | 0        | 0 |
| 9.86E-05 | 0        | 3.29E-05 | 0 | 0 | 3.29E-05 | 0        | 3.29E-05 | 0 |
| 0        | 0        | 0        | 0 | 0 | 0        | 0        | 3.29E-05 | 0 |
| 0.00069  | 0        | 0        | 0 | 0 | 0.001118 | 0.000131 | 9.86E-05 | 0 |
| 0        | 0        | 0        | 0 | 0 | 0        | 0        | 0        | 0 |
| 0.000131 | 0        | 0        | 0 | 0 | 0        | 0        | 0        | 0 |
| 0        | 0        | 0        | 0 | 0 | 0.00023  | 0        | 0.001282 | 0 |
| 0.001545 | 0        | 0        | 0 | 0 | 0.00194  | 0        | 0.003485 | 0 |
| 3.29E-05 | 0        | 0        | 0 | 0 | 0.001446 | 0        | 0.002137 | 0 |
| 0.00046  | 0        | 0        | 0 | 0 | 0.000953 | 0        | 0.010027 | 0 |
| 0.001118 | 0        | 0        | 0 | 0 | 0.000953 | 0        | 0.00641  | 0 |
| 0.002729 | 0        | 0.000131 | 0 | 0 | 0.000164 | 0        | 0.0668   | 0 |
| 0.000197 | 0        | 0        | 0 | 0 | 0.000263 | 3.29E-05 | 0.005687 | 0 |
| 0        | 0        | 0        | 0 | 0 | 0.004833 | 0        | 0.004307 | 0 |
| 0.001052 | 0        | 3.29E-05 | 0 | 0 | 0.001348 | 0        | 0.010158 | 0 |
| 0        | 0.000263 | 0        | 0 | 0 | 0.000986 | 3.29E-05 | 0.010783 | 0 |
| 0.000362 | 6.57E-05 | 0        | 0 | 0 | 0.001644 | 0        | 0.013676 | 0 |
| 0        | 0        | 0        | 0 | 0 | 0.001512 | 9.86E-05 | 0.002433 | 0 |
| 3.29E-05 | 0        | 0        | 0 | 0 | 0.00092  | 0        | 0.003024 | 0 |
| 0.000657 | 0        | 0        | 0 | 0 | 0.000822 | 0        | 0.001907 | 0 |
| 6.57E-05 | 0        | 0        | 0 | 0 | 0.00069  | 3.29E-05 | 0.003123 | 0 |
| 0.000131 | 0        | 0        | 0 | 0 | 0.000789 | 0        | 0.000986 | 0 |

|          |          |          |   |          |          |          |          |   |
|----------|----------|----------|---|----------|----------|----------|----------|---|
| 0.000822 | 0        | 0        | 0 | 0        | 0.010783 | 0.000362 | 0.037082 | 0 |
| 6.57E-05 | 0        | 0        | 0 | 0        | 0.002367 | 0        | 0.007528 | 0 |
| 6.57E-05 | 0        | 0        | 0 | 0        | 0.000723 | 0.000296 | 0.003024 | 0 |
| 0        | 0        | 0        | 0 | 0        | 0        | 0        | 0.010651 | 0 |
| 0.00046  | 0        | 0        | 0 | 0        | 0.012163 | 0        | 0.088432 | 0 |
| 0.000657 | 0        | 6.57E-05 | 0 | 0        | 0.004734 | 0        | 0.019823 | 0 |
| 0        | 0        | 0        | 0 | 6.57E-05 | 0.030967 | 0        | 0.001381 | 0 |
| 0.000723 | 0        | 0        | 0 | 0        | 0.021861 | 0        | 0.003419 | 0 |
| 0.000822 | 0.000263 | 0        | 0 | 0        | 0.010848 | 0        | 0.000394 | 0 |
| 0        | 6.57E-05 | 0        | 0 | 0        | 0.016273 | 0        | 0.001019 | 0 |
| 0.000427 | 0        | 0        | 0 | 0        | 0.00263  | 0        | 0.001775 | 0 |
| 0.000427 | 0        | 0        | 0 | 0        | 0.004865 | 0        | 0.000888 | 0 |
| 6.57E-05 | 9.86E-05 | 0        | 0 | 0        | 0.043854 | 0        | 0.000559 | 0 |
| 0        | 0        | 0        | 0 | 0        | 0.002729 | 0        | 0.00023  | 0 |
| 0        | 0        | 0        | 0 | 0        | 0.001841 | 0        | 0.007528 | 0 |
| 0.000164 | 0        | 3.29E-05 | 0 | 0        | 0.005753 | 0        | 0.024097 | 0 |
| 0.000723 | 0        | 0        | 0 | 0        | 0.000559 | 0        | 0.002334 | 0 |
| 9.86E-05 | 0        | 0        | 0 | 0        | 0.000493 | 0        | 0.00069  | 0 |
| 0        | 0        | 0        | 0 | 0        | 0.004142 | 0        | 0.020744 | 0 |
| 0        | 0        | 0        | 0 | 0        | 0.004076 | 0        | 0.010191 | 0 |
| 0        | 0        | 0        | 0 | 0        | 0.00023  | 0        | 0.000296 | 0 |
| 0        | 0        | 0        | 0 | 0        | 0.000986 | 0        | 0.006509 | 0 |
| 0.000723 | 0        | 0        | 0 | 0        | 0.001216 | 0        | 0.019494 | 0 |
| 3.29E-05 | 0        | 0        | 0 | 0        | 0        | 0        | 0        | 0 |
| 0        | 0        | 3.29E-05 | 0 | 0        | 3.29E-05 | 0        | 0        | 0 |
| 0        | 6.57E-05 | 0        | 0 | 0        | 3.29E-05 | 0        | 0        | 0 |
| 9.86E-05 | 0        | 0        | 0 | 0        | 9.86E-05 | 0        | 0        | 0 |
| 3.29E-05 | 3.29E-05 | 0        | 0 | 0        | 0.000164 | 0        | 0        | 0 |
| 6.57E-05 | 0        | 0        | 0 | 0        | 0.003813 | 0        | 0.009336 | 0 |
| 6.57E-05 | 0        | 0        | 0 | 0        | 0.000197 | 0        | 0.001019 | 0 |
| 0        | 3.29E-05 | 0        | 0 | 0        | 0.000263 | 0        | 0.000657 | 0 |
| 0.001611 | 0        | 0        | 0 | 0        | 0        | 3.29E-05 | 0.001019 | 0 |
| 0        | 3.29E-05 | 0        | 0 | 0        | 0.001808 | 0        | 0.009303 | 0 |
| 0        | 0        | 0        | 0 | 0        | 0.005128 | 0        | 0.024623 | 0 |
| 0        | 0        | 0        | 0 | 0        | 0.001052 | 0        | 0.005819 | 0 |
| 9.86E-05 | 0        | 0        | 0 | 0        | 9.86E-05 | 0        | 0.000625 | 0 |
| 0.005852 | 0        | 6.57E-05 | 0 | 0        | 0.010684 | 0        | 0.005852 | 0 |
| 0.003715 | 0        | 0        | 0 | 0        | 3.29E-05 | 0        | 0.000723 | 0 |
| 0.000329 | 0        | 6.57E-05 | 0 | 0        | 0.003452 | 0        | 0.016075 | 0 |
| 0.002334 | 0        | 0        | 0 | 0        | 0.00092  | 0        | 0.013051 | 0 |
| 0        | 0        | 0        | 0 | 0        | 0.003583 | 0        | 0.018015 | 0 |
| 0        | 0        | 0        | 0 | 0        | 0.002005 | 0        | 0.008153 | 0 |
| 0        | 0        | 0        | 0 | 0        | 0.00263  | 0        | 0.000394 | 0 |
| 0        | 0        | 0        | 0 | 0        | 0.000427 | 3.29E-05 | 0.00069  | 0 |
| 9.86E-05 | 6.57E-05 | 3.29E-05 | 0 | 0        | 0.062724 | 0        | 0.004537 | 0 |
| 0.001611 | 0        | 0        | 0 | 0        | 0.006509 | 0        | 0.04129  | 0 |
| 0.000526 | 0        | 3.29E-05 | 0 | 0        | 0.004076 | 0        | 0.061902 | 0 |

|          |          |          |          |   |          |          |          |          |
|----------|----------|----------|----------|---|----------|----------|----------|----------|
| 0        | 0        | 0        | 0        | 0 | 0.004339 | 0.000559 | 0.022617 | 0        |
| 0        | 3.29E-05 | 0        | 0        | 0 | 0.002992 | 0        | 0.018541 | 0        |
| 0.000493 | 0        | 0        | 0        | 0 | 0.001677 | 0        | 0.000723 | 0        |
| 6.57E-05 | 9.86E-05 | 0        | 0        | 0 | 0.005654 | 0        | 0.003353 | 0        |
| 0.000131 | 3.29E-05 | 6.57E-05 | 0        | 0 | 0.003386 | 0        | 0.003024 | 0        |
| 6.57E-05 | 0        | 0        | 0        | 0 | 0.008712 | 0        | 0.004274 | 0        |
| 3.29E-05 | 0        | 0        | 0        | 0 | 0.003583 | 0        | 0.002367 | 0        |
| 0        | 0        | 0        | 0        | 0 | 0.000657 | 0        | 0.00069  | 0        |
| 0        | 0.000164 | 0        | 0        | 0 | 0.002531 | 0        | 0.01029  | 0        |
| 0        | 0        | 0        | 0        | 0 | 0.014465 | 0        | 0.008843 | 0        |
| 0        | 9.86E-05 | 0        | 0        | 0 | 0.002301 | 0        | 0.006115 | 0        |
| 0        | 0        | 0        | 0        | 0 | 0.000493 | 0        | 0.003057 | 0        |
| 0        | 6.57E-05 | 0        | 0        | 0 | 0.007068 | 0        | 0.005293 | 0        |
| 0.000756 | 0        | 3.29E-05 | 0        | 0 | 0.017029 | 0        | 0.027187 | 0        |
| 0        | 3.29E-05 | 0        | 0        | 0 | 0.004076 | 0        | 0.001611 | 0        |
| 0        | 3.29E-05 | 0        | 0        | 0 | 0.000986 | 0        | 0.001381 | 0        |
| 0.000362 | 0        | 0        | 0        | 0 | 0.000953 | 0        | 6.57E-05 | 0        |
| 0        | 0        | 0        | 0        | 0 | 0.000559 | 0        | 0.001907 | 0        |
| 0.000526 | 0        | 0        | 0        | 0 | 0.000263 | 0        | 3.29E-05 | 0        |
| 0.000526 | 0        | 0        | 0        | 0 | 0.000131 | 3.29E-05 | 0.000789 | 0        |
| 0.000131 | 0        | 0        | 0        | 0 | 0.002137 | 0        | 0.031329 | 0        |
| 0.000888 | 0        | 0        | 9.86E-05 | 0 | 0.00743  | 0        | 0.017686 | 0        |
| 0        | 0        | 0        | 0        | 0 | 0.001972 | 0        | 0.008219 | 0        |
| 0        | 0        | 0        | 0        | 0 | 0.002137 | 0        | 0.010125 | 0        |
| 0        | 0        | 0        | 0        | 0 | 0.002301 | 0        | 0.004602 | 0        |
| 0        | 0        | 0        | 0        | 0 | 0.002268 | 0        | 0.003978 | 0        |
| 0.000329 | 0        | 0        | 0        | 0 | 0.006772 | 0        | 0.020152 | 0        |
| 6.57E-05 | 9.86E-05 | 0        | 0        | 0 | 0.01956  | 0        | 0.001085 | 0        |
| 3.29E-05 | 0        | 0        | 0        | 0 | 0.000329 | 0        | 3.29E-05 | 0        |
| 0.000164 | 0.000197 | 0        | 0        | 0 | 0.006936 | 0        | 0.000131 | 0        |
| 0        | 0.000197 | 0        | 0        | 0 | 0.003649 | 0        | 9.86E-05 | 0        |
| 9.86E-05 | 0        | 0        | 0        | 0 | 0.000197 | 0        | 0.012854 | 0        |
| 0.001085 | 0        | 0        | 0        | 0 | 3.29E-05 | 0        | 0.010684 | 0        |
| 0        | 0        | 0        | 0        | 0 | 0.00286  | 0.000657 | 0.00023  | 0        |
| 0        | 0        | 0        | 0        | 0 | 0        | 0        | 6.57E-05 | 0        |
| 0.000723 | 0        | 0        | 0        | 0 | 0.025149 | 0        | 0.001677 | 0        |
| 0.001282 | 0        | 0        | 0        | 0 | 0.004635 | 0        | 0.005063 | 0        |
| 0        | 0        | 0        | 0        | 0 | 0.002597 | 0.00046  | 0.006082 | 0        |
| 0        | 0        | 0        | 0        | 0 | 0.003649 | 0.001085 | 0.005523 | 0        |
| 0.001709 | 0        | 0        | 0        | 0 | 0.000986 | 3.29E-05 | 0.003846 | 0.000131 |
| 0.00023  | 0        | 0        | 0        | 0 | 0.000131 | 0        | 0.000822 | 0        |
| 0.000164 | 0        | 0        | 0        | 0 | 0.000197 | 0        | 3.29E-05 | 0        |
| 0        | 0        | 0        | 0        | 0 | 0.001709 | 0.00286  | 0.003748 | 0        |
| 0        | 0        | 0        | 0        | 0 | 0.009369 | 0.000164 | 0.006641 | 0        |
| 0.000427 | 0        | 0        | 0        | 0 | 0.004767 | 0        | 3.29E-05 | 0        |
| 0.009402 | 0        | 6.57E-05 | 0        | 0 | 3.29E-05 | 0        | 3.29E-05 | 0        |
| 0.017982 | 0        | 0.000296 | 0        | 0 | 0        | 0        | 0        | 0        |

|          |          |          |   |          |          |          |          |         |
|----------|----------|----------|---|----------|----------|----------|----------|---------|
| 0        | 0        | 0        | 0 | 0        | 0.000756 | 0        | 0.000131 | 0       |
| 0        | 0        | 0        | 0 | 0        | 0.000986 | 3.29E-05 | 0.006904 | 0       |
| 0.001644 | 0        | 3.29E-05 | 0 | 0        | 6.57E-05 | 0        | 0.000986 | 0.00023 |
| 0.003419 | 0        | 3.29E-05 | 0 | 0        | 0.00023  | 0        | 0.003912 | 0       |
| 0.001512 | 0        | 0        | 0 | 0        | 0        | 0        | 0        | 0       |
| 0        | 0        | 0        | 0 | 0        | 0        | 0        | 6.57E-05 | 0       |
| 0.000329 | 0        | 0        | 0 | 0        | 0        | 0        | 3.29E-05 | 0       |
| 0        | 0        | 0        | 0 | 0        | 0        | 0        | 0        | 0       |
| 0        | 0        | 0        | 0 | 0        | 0        | 0        | 0        | 0       |
| 0        | 0        | 0        | 0 | 0        | 0        | 0        | 0        | 0       |
| 0        | 0        | 0        | 0 | 0        | 0        | 0        | 0        | 0       |
| 0        | 0        | 0        | 0 | 0        | 0        | 0        | 3.29E-05 | 0       |
| 0        | 0        | 0        | 0 | 0        | 0        | 0        | 0        | 0       |
| 6.57E-05 | 0        | 0        | 0 | 0        | 3.29E-05 | 0        | 3.29E-05 | 0       |
| 0.000263 | 0        | 0        | 0 | 0        | 0        | 3.29E-05 | 3.29E-05 | 0       |
| 0        | 0        | 0        | 0 | 0        | 3.29E-05 | 0        | 0.000263 | 0       |
| 0.000559 | 0        | 3.29E-05 | 0 | 0        | 0.011243 | 0        | 0.036819 | 0       |
| 0.000296 | 0        | 0        | 0 | 0        | 0.010191 | 0        | 0.056313 | 0       |
| 0.002071 | 0        | 3.29E-05 | 0 | 0        | 0.001118 | 0        | 0.004668 | 0       |
| 0        | 0        | 0        | 0 | 0        | 0.000592 | 0        | 0.002334 | 0       |
| 0.000592 | 3.29E-05 | 0        | 0 | 0        | 0.000427 | 0        | 0.000625 | 0       |
| 0.000559 | 0        | 0        | 0 | 0        | 0.004602 | 0        | 0.0215   | 0       |
| 0        | 0        | 0        | 0 | 0        | 0.003518 | 0        | 0.001085 | 0       |
| 0.001742 | 0        | 0        | 0 | 0        | 0.003189 | 0        | 0.009566 | 0       |
| 0.000888 | 0        | 0        | 0 | 0        | 0.009829 | 0.001348 | 0.010914 | 0       |
| 0.002235 | 0        | 0        | 0 | 0        | 0.001611 | 0.000164 | 0.002663 | 0       |
| 0.000362 | 6.57E-05 | 0        | 0 | 0        | 0.008186 | 0.000986 | 0.020513 | 0       |
| 0.000559 | 0        | 0        | 0 | 0        | 0.000986 | 0.001315 | 0.006509 | 0       |
| 0        | 0        | 0        | 0 | 3.29E-05 | 0.004537 | 0.00046  | 0.003912 | 0       |
| 0        | 9.86E-05 | 0        | 0 | 0        | 0.006542 | 0.0024   | 0.007298 | 0       |
| 0.000131 | 0        | 0        | 0 | 0        | 0.000855 | 0.000296 | 0.005424 | 0       |
| 0        | 0        | 0        | 0 | 0        | 0.010388 | 0.013117 | 0.006772 | 0       |
| 0        | 0        | 0        | 0 | 0        | 0.000559 | 0.00023  | 0.001611 | 0       |
| 9.86E-05 | 0        | 0        | 0 | 0        | 0.002663 | 0.001775 | 0.004339 | 0       |
| 0        | 0        | 0        | 0 | 0        | 0.001972 | 0        | 0.001709 | 0       |
| 3.29E-05 | 3.29E-05 | 0        | 0 | 3.29E-05 | 0.004668 | 0.004339 | 0.006312 | 0       |
| 0.020481 | 0        | 0.000131 | 0 | 0        | 0.010585 | 0        | 0.002498 | 0       |
| 0.002268 | 0        | 0        | 0 | 0        | 0.002696 | 0        | 0.000855 | 0       |
| 0.000855 | 9.86E-05 | 0        | 0 | 0        | 0.008646 | 0        | 0.002466 | 0       |
| 0.00092  | 0        | 0        | 0 | 0        | 0.008679 | 0        | 0.011736 | 0       |
| 0.000427 | 0        | 0        | 0 | 3.29E-05 | 0.007923 | 0        | 0.001414 | 0       |
| 0.000657 | 6.57E-05 | 0        | 0 | 0        | 0.020711 | 6.57E-05 | 0.008876 | 0       |
| 0.015517 | 0        | 0.000197 | 0 | 0        | 0.000986 | 0        | 0.003649 | 0       |
| 0.007101 | 0        | 3.29E-05 | 0 | 0        | 0.000197 | 0        | 0.00092  | 0       |
| 0.002005 | 0        | 0        | 0 | 0        | 0.002893 | 0        | 0.005391 | 0       |
| 0.00069  | 0        | 0        | 0 | 0        | 0.001414 | 0        | 0.001644 | 0       |

|          |          |          |   |   |          |          |          |          |
|----------|----------|----------|---|---|----------|----------|----------|----------|
| 0.000263 | 0        | 6.57E-05 | 0 | 0 | 0.004372 | 0        | 0.009303 | 0        |
| 9.86E-05 | 0        | 0        | 0 | 0 | 0.003353 | 0        | 0.004602 | 0        |
| 0.000953 | 0        | 0        | 0 | 0 | 6.57E-05 | 0        | 0.00069  | 0        |
| 0        | 0        | 0        | 0 | 0 | 0.009402 | 3.29E-05 | 0.007167 | 0        |
| 0.000427 | 0        | 3.29E-05 | 0 | 0 | 0.001446 | 0        | 0.001644 | 0        |
| 0        | 6.57E-05 | 0        | 0 | 0 | 0.00526  | 0.003912 | 0.012591 | 0        |
| 0.00046  | 0        | 0        | 0 | 0 | 0.010454 | 0        | 0.000263 | 0        |
| 0.000263 | 0        | 0        | 0 | 0 | 0.001183 | 0        | 0.000362 | 0        |
| 0.000263 | 6.57E-05 | 0        | 0 | 0 | 0.02837  | 0        | 0.000362 | 0        |
| 0        | 0.000131 | 0        | 0 | 0 | 0.00355  | 0        | 0.001381 | 0        |
| 0        | 0        | 0        | 0 | 0 | 0.024557 | 0        | 0.002959 | 0        |
| 3.29E-05 | 3.29E-05 | 0        | 0 | 0 | 0.005326 | 0        | 0.005852 | 0        |
| 0.000329 | 0        | 0        | 0 | 0 | 0.009172 | 0        | 0.004307 | 0        |
| 0.001118 | 0        | 0        | 0 | 0 | 0.018574 | 0        | 0.0167   | 0        |
| 9.86E-05 | 9.86E-05 | 0        | 0 | 0 | 0.01098  | 0        | 0.006805 | 0        |
| 0.000625 | 9.86E-05 | 0        | 0 | 0 | 0.00355  | 0        | 0.010454 | 0        |
| 0        | 0        | 0        | 0 | 0 | 0.003353 | 0.001282 | 0.012755 | 0        |
| 0        | 9.86E-05 | 0        | 0 | 0 | 0.00263  | 0        | 0.012722 | 0        |
| 0        | 3.29E-05 | 0        | 0 | 0 | 0.001907 | 0        | 0.008284 | 0        |
| 3.29E-05 | 3.29E-05 | 0        | 0 | 0 | 0.00263  | 0        | 0        | 0        |
| 0.00069  | 0        | 3.29E-05 | 0 | 0 | 0.004701 | 0        | 0.024261 | 0        |
| 0.000263 | 0        | 0        | 0 | 0 | 0.003353 | 0        | 0.011079 | 0        |
| 0.000131 | 0        | 0        | 0 | 0 | 0.002531 | 0        | 0.009501 | 0        |
| 9.86E-05 | 0        | 0        | 0 | 0 | 0.003287 | 0        | 0.002301 | 0        |
| 0.00046  | 9.86E-05 | 0        | 0 | 0 | 0.005852 | 0        | 0.015122 | 0        |
| 0        | 0        | 0        | 0 | 0 | 0.009008 | 0        | 0.00641  | 0        |
| 3.29E-05 | 0        | 0        | 0 | 0 | 0.002696 | 0        | 0.023637 | 0        |
| 0.000493 | 0        | 0        | 0 | 0 | 0.003518 | 0        | 0.018541 | 0        |
| 0.000296 | 3.29E-05 | 0        | 0 | 0 | 0.001216 | 0        | 0.003353 | 0        |
| 0.00641  | 3.29E-05 | 0        | 0 | 0 | 0.010585 | 0        | 0.013544 | 0        |
| 3.29E-05 | 0.000427 | 0        | 0 | 0 | 0.052007 | 0        | 9.86E-05 | 0        |
| 0        | 3.29E-05 | 0        | 0 | 0 | 0.004931 | 0        | 0.005786 | 0        |
| 3.29E-05 | 0        | 0        | 0 | 0 | 0.001709 | 0        | 0.004372 | 0        |
| 0.000657 | 0        | 0        | 0 | 0 | 0.006279 | 0        | 0.014662 | 0        |
| 0.000493 | 0        | 0        | 0 | 0 | 0.001841 | 0        | 0.006575 | 0        |
| 0        | 0        | 0        | 0 | 0 | 0        | 0        | 0        | 0        |
| 0.000197 | 0        | 0        | 0 | 0 | 0.000296 | 0        | 0.000164 | 3.29E-05 |
| 0.000953 | 0        | 0        | 0 | 0 | 0.000394 | 0        | 6.57E-05 | 0        |
| 0.00023  | 0        | 0        | 0 | 0 | 0.000263 | 0        | 9.86E-05 | 0        |
| 0.005227 | 0        | 3.29E-05 | 0 | 0 | 3.29E-05 | 0        | 6.57E-05 | 0        |
| 0.000164 | 0        | 0        | 0 | 0 | 0.00355  | 3.29E-05 | 0.002235 | 0        |
| 0        | 0        | 0        | 0 | 0 | 0        | 0        | 0        | 0        |
| 0        | 0        | 0        | 0 | 0 | 9.86E-05 | 0        | 6.57E-05 | 0        |
| 3.29E-05 | 0        | 0        | 0 | 0 | 0        | 0        | 3.29E-05 | 0        |
| 6.57E-05 | 0        | 0        | 0 | 0 | 3.29E-05 | 0        | 0        | 0        |
| 0.001052 | 0        | 0        | 0 | 0 | 0.018771 | 0        | 0.037641 | 0        |
| 3.29E-05 | 6.57E-05 | 0        | 0 | 0 | 0.089188 | 0        | 0.001151 | 0        |



|          |          |          |   |          |          |          |          |          |
|----------|----------|----------|---|----------|----------|----------|----------|----------|
| 0        | 6.57E-05 | 0        | 0 | 0        | 0.005884 | 0        | 0.009797 | 0        |
| 0.000526 | 0        | 0        | 0 | 0        | 0.000657 | 0        | 0.002531 | 0        |
| 0.001249 | 0        | 0        | 0 | 0        | 0.006936 | 0        | 0.004274 | 0        |
| 0.000657 | 0        | 0        | 0 | 0        | 9.86E-05 | 0        | 0.010553 | 0        |
| 6.57E-05 | 0        | 0        | 0 | 0        | 0.00023  | 0        | 0.011572 | 0        |
| 0        | 0        | 0        | 0 | 0        | 0.002005 | 0        | 0.001644 | 0        |
| 0.004044 | 0        | 3.29E-05 | 0 | 0        | 0        | 0        | 0.008646 | 0        |
| 0.014235 | 0        | 0        | 0 | 0        | 0        | 0        | 0.000657 | 0        |
| 0.001151 | 0        | 0        | 0 | 0        | 3.29E-05 | 0        | 0.000625 | 0        |
| 0.000657 | 0        | 3.29E-05 | 0 | 0        | 0.004339 | 0        | 0.006575 | 0        |
| 3.29E-05 | 0        | 0        | 0 | 0        | 0        | 0        | 0.001414 | 0        |
| 0.00023  | 0        | 0        | 0 | 0        | 0.000723 | 0        | 0.001118 | 0        |
| 3.29E-05 | 0        | 0        | 0 | 0        | 0.001479 | 6.57E-05 | 0.001742 | 0        |
| 9.86E-05 | 0        | 0        | 0 | 0        | 0.000329 | 9.86E-05 | 0.002992 | 0        |
| 0.000559 | 0        | 0        | 0 | 0        | 0.000164 | 0        | 0.000657 | 0        |
| 0.000559 | 0        | 0        | 0 | 0        | 0        | 0        | 0.000164 | 0        |
| 0.001545 | 0        | 6.57E-05 | 0 | 0        | 0        | 0        | 0.002433 | 0        |
| 0.003255 | 0        | 3.29E-05 | 0 | 0        | 0        | 0        | 0.000263 | 0        |
| 0.000822 | 0        | 0        | 0 | 0        | 0.000164 | 0        | 0.004767 | 0        |
| 0        | 0        | 0        | 0 | 0        | 0        | 0        | 3.29E-05 | 0        |
| 0.000362 | 0        | 0        | 0 | 0        | 3.29E-05 | 0        | 0.000427 | 0        |
| 9.86E-05 | 0        | 0        | 0 | 0        | 0.000131 | 0        | 0.000427 | 9.86E-05 |
| 0.000329 | 0        | 0        | 0 | 0        | 0        | 0        | 0.000723 | 0        |
| 0        | 0        | 0        | 0 | 0        | 0        | 0        | 0.000394 | 0        |
| 0.00023  | 6.57E-05 | 0        | 0 | 0        | 0.005095 | 0        | 0.004405 | 0        |
| 0.000723 | 0        | 0        | 0 | 0        | 0.000723 | 0        | 0.002531 | 0.000197 |
| 3.29E-05 | 0        | 0        | 0 | 0        | 0.000559 | 0        | 6.57E-05 | 0        |
| 0.00069  | 0        | 3.29E-05 | 0 | 0        | 0.003024 | 0        | 0.021237 | 0        |
| 0.001709 | 0        | 3.29E-05 | 0 | 0        | 0.007101 | 0.000164 | 0.008679 | 0        |
| 0.000197 | 6.57E-05 | 0        | 0 | 0        | 0.037312 | 0.000394 | 0.040501 | 0        |
| 0.001907 | 0        | 0        | 0 | 0        | 0.014563 | 0.000526 | 0.024393 | 0        |
| 0        | 3.29E-05 | 0        | 0 | 0        | 0.009468 | 0.001216 | 0.010684 | 0        |
| 0.001118 | 0        | 3.29E-05 | 0 | 0        | 0.015089 | 9.86E-05 | 0.017127 | 0        |
| 3.29E-05 | 9.86E-05 | 0        | 0 | 0        | 0.01338  | 0.000493 | 0.089056 | 0        |
| 0.000263 | 6.57E-05 | 0        | 0 | 0        | 0.004109 | 3.29E-05 | 0.008021 | 0        |
| 0.000592 | 0        | 3.29E-05 | 0 | 0        | 0.000263 | 0        | 0.003715 | 0        |
| 3.29E-05 | 0        | 0        | 0 | 0        | 0.022486 | 0        | 3.29E-05 | 0        |
| 0.000131 | 0        | 0        | 0 | 0        | 0.002235 | 0        | 0.006115 | 0        |
| 0        | 0        | 0        | 0 | 0        | 0.001479 | 0        | 0.002137 | 0        |
| 0.001644 | 0        | 0        | 0 | 0        | 0.002926 | 0        | 0        | 0        |
| 3.29E-05 | 0        | 0        | 0 | 0        | 0.00595  | 0        | 0        | 0        |
| 0.001709 | 0        | 0        | 0 | 9.86E-05 | 0.031132 | 0.05181  | 0.014267 | 0        |
| 0.000362 | 0        | 0        | 0 | 0        | 0.004602 | 9.86E-05 | 0.009632 | 0        |
| 0        | 0        | 3.29E-05 | 0 | 0        | 0.01933  | 0.006115 | 0.001545 | 0        |
| 0.000822 | 9.86E-05 | 0        | 0 | 3.29E-05 | 0.043394 | 0.023571 | 0.001907 | 0        |
| 0        | 0        | 0        | 0 | 0        | 0.003748 | 0.00355  | 0.006115 | 0        |
| 0        | 0        | 0        | 0 | 0        | 0.001841 | 0.000362 | 0.008745 | 0        |

|          |          |          |   |   |          |          |          |          |
|----------|----------|----------|---|---|----------|----------|----------|----------|
| 3.29E-05 | 0        | 0        | 0 | 0 | 3.29E-05 | 0        | 0.018936 | 0        |
| 0.003485 | 3.29E-05 | 0        | 0 | 0 | 0.000855 | 0        | 0.009599 | 0        |
| 9.86E-05 | 0        | 0        | 0 | 0 | 0.00457  | 0        | 0.023439 | 0        |
| 0.000263 | 3.29E-05 | 0        | 0 | 0 | 0.004438 | 0        | 0.014925 | 0        |
| 0.003353 | 0        | 0        | 0 | 0 | 0.00835  | 0        | 0.020218 | 0        |
| 0.004767 | 0        | 0        | 0 | 0 | 0.006772 | 0        | 0.010191 | 0.00023  |
| 0        | 0.000263 | 0        | 0 | 0 | 0.008909 | 0        | 0.00572  | 0        |
| 0        | 9.86E-05 | 0        | 0 | 0 | 0.006838 | 0        | 0.002334 | 0        |
| 3.29E-05 | 3.29E-05 | 0        | 0 | 0 | 0.001972 | 0        | 0.002531 | 0        |
| 3.29E-05 | 0        | 0        | 0 | 0 | 0.019659 | 0        | 0.002696 | 0        |
| 3.29E-05 | 0        | 0        | 0 | 0 | 0.005852 | 0        | 0.005391 | 3.29E-05 |
| 9.86E-05 | 0        | 0        | 0 | 0 | 0.005128 | 0        | 0.003945 | 0.002827 |
| 9.86E-05 | 0.00023  | 0        | 0 | 0 | 0.028732 | 0        | 0.002597 | 0        |
| 0.001446 | 0        | 0        | 0 | 0 | 0.00069  | 0        | 0.002334 | 0        |
| 0.000164 | 0        | 0        | 0 | 0 | 0.001151 | 0        | 0.0048   | 0        |
| 0        | 0        | 0        | 0 | 0 | 0.000362 | 0        | 0.00309  | 0        |
| 3.29E-05 | 0        | 0        | 0 | 0 | 0.000559 | 0        | 0.001808 | 0        |
| 0        | 3.29E-05 | 0        | 0 | 0 | 0.000362 | 0        | 0.00858  | 0        |
| 0        | 0        | 0        | 0 | 0 | 0.002696 | 0        | 0.010092 | 0        |
| 0.000263 | 6.57E-05 | 0        | 0 | 0 | 0.003781 | 0        | 0.018804 | 0        |
| 0        | 0        | 0        | 0 | 0 | 0.000394 | 0        | 0.002203 | 0        |
| 0        | 0        | 0        | 0 | 0 | 0.001282 | 0        | 0.004438 | 0        |
| 0.000164 | 0        | 0        | 0 | 0 | 0.000592 | 0        | 0.00332  | 0        |
| 0.000131 | 0        | 0        | 0 | 0 | 0.00046  | 0        | 0.004701 | 0        |
| 3.29E-05 | 0        | 0        | 0 | 0 | 0.004044 | 0        | 0.011999 | 0        |
| 0.000723 | 0        | 0        | 0 | 0 | 0        | 0        | 3.29E-05 | 0        |
| 0.000789 | 0        | 0        | 0 | 0 | 0.001019 | 0.000493 | 0.000164 | 0        |
| 0.000855 | 0        | 0        | 0 | 0 | 6.57E-05 | 0        | 0        | 0        |
| 3.29E-05 | 0        | 0        | 0 | 0 | 3.29E-05 | 0        | 0        | 0        |
| 0        | 0        | 0        | 0 | 0 | 0        | 0        | 0        | 0        |
| 0.001183 | 0        | 0        | 0 | 0 | 0        | 0        | 6.57E-05 | 0        |
| 9.86E-05 | 0        | 0        | 0 | 0 | 0        | 0        | 0        | 0        |
| 0.001315 | 0        | 0        | 0 | 0 | 0        | 0        | 0        | 0        |
| 0.001611 | 0        | 3.29E-05 | 0 | 0 | 3.29E-05 | 0        | 0        | 0        |
| 9.86E-05 | 0        | 3.29E-05 | 0 | 0 | 0        | 0        | 0        | 0        |
| 0.002729 | 3.29E-05 | 0        | 0 | 0 | 0.00503  | 0        | 0.009829 | 0        |
| 0        | 6.57E-05 | 0        | 0 | 0 | 0.002893 | 0        | 0.0119   | 0        |
| 3.29E-05 | 0        | 0        | 0 | 0 | 0.002367 | 0        | 0.015221 | 0        |
| 0.001841 | 0        | 0        | 0 | 0 | 0.008054 | 0        | 0.014432 | 0        |
| 0.000986 | 6.57E-05 | 0        | 0 | 0 | 0.025412 | 0        | 0.002104 | 0        |
| 6.57E-05 | 3.29E-05 | 0        | 0 | 0 | 0.027417 | 0        | 0.007068 | 0        |
| 9.86E-05 | 3.29E-05 | 0        | 0 | 0 | 0.004175 | 0        | 0.000263 | 0        |
| 0        | 0.000131 | 0        | 0 | 0 | 0.019297 | 0        | 0.003846 | 0        |
| 0.000263 | 0        | 0        | 0 | 0 | 0.002498 | 0        | 0.006871 | 0        |
| 0.000657 | 0        | 3.29E-05 | 0 | 0 | 0.01361  | 3.29E-05 | 0.037214 | 0        |
| 0        | 0        | 0        | 0 | 0 | 6.57E-05 | 0        | 0.003222 | 0        |
| 0        | 0        | 0        | 0 | 0 | 0.00069  | 0        | 0.000855 | 0        |

|          |          |          |   |          |          |          |          |          |
|----------|----------|----------|---|----------|----------|----------|----------|----------|
| 3.29E-05 | 0.000131 | 0        | 0 | 0        | 0.004537 | 0        | 0.00457  | 0        |
| 0.000493 | 0        | 0        | 0 | 0        | 0.001381 | 0        | 0.002597 | 0        |
| 0        | 0        | 0        | 0 | 0        | 0.00023  | 0        | 0.003748 | 0        |
| 0.001512 | 0        | 3.29E-05 | 0 | 0        | 0.000526 | 0        | 0.00743  | 0        |
| 0.000164 | 0        | 0        | 0 | 0        | 0.004865 | 0        | 0.004668 | 0        |
| 3.29E-05 | 9.86E-05 | 0        | 0 | 3.29E-05 | 0.008251 | 0        | 0.000723 | 0        |
| 0.000723 | 0.000164 | 0        | 0 | 0        | 0.022223 | 0        | 0.000164 | 0        |
| 0.00023  | 0        | 0        | 0 | 0        | 0.00549  | 0        | 0.001249 | 0        |
| 0        | 3.29E-05 | 0        | 0 | 0        | 0.002235 | 0        | 0.000197 | 0        |
| 6.57E-05 | 0        | 0        | 0 | 0        | 0.003978 | 0        | 6.57E-05 | 0        |
| 0.000263 | 0.000131 | 0        | 0 | 0        | 0.009665 | 0        | 0.01841  | 0        |
| 0        | 6.57E-05 | 0        | 0 | 3.29E-05 | 0.001907 | 0.001381 | 0.000855 | 0        |
| 0.00286  | 0        | 6.57E-05 | 0 | 0        | 0.001479 | 0        | 0.004109 | 0        |
| 0.004438 | 0        | 3.29E-05 | 0 | 0        | 0.002005 | 0        | 0.005589 | 0        |
| 3.29E-05 | 0        | 0        | 0 | 0        | 0.015056 | 0        | 0.000427 | 0        |
| 0        | 0        | 0        | 0 | 0        | 0.007791 | 0        | 0.001841 | 0        |
| 6.57E-05 | 0        | 0        | 0 | 0        | 0.002301 | 0        | 0.000197 | 6.57E-05 |
| 0.00046  | 0        | 0        | 0 | 0        | 0.007265 | 0        | 0.02002  | 0.000164 |
| 0        | 0        | 0        | 0 | 0        | 0.000625 | 0        | 0.009369 | 0.000953 |
| 0.000164 | 0        | 0        | 0 | 0        | 0.001479 | 0        | 0.002564 | 0        |
| 3.29E-05 | 6.57E-05 | 0        | 0 | 9.86E-05 | 0.011013 | 0        | 0.008054 | 0.000197 |
| 0.000822 | 0        | 0        | 0 | 0        | 0.006838 | 9.86E-05 | 0.025839 | 0        |
| 0        | 0        | 0        | 0 | 0        | 0.000197 | 0        | 0.002531 | 0        |





































































|          |   |   |          |   |   |          |   |   |
|----------|---|---|----------|---|---|----------|---|---|
|          | 0 | 0 | 0        | 0 | 0 | 0        | 0 | 0 |
|          | 0 | 0 | 0        | 0 | 0 | 0        | 0 | 0 |
|          | 0 | 0 | 0        | 0 | 0 | 0        | 0 | 0 |
|          | 0 | 0 | 0        | 0 | 0 | 0        | 0 | 0 |
|          | 0 | 0 | 0        | 0 | 0 | 0        | 0 | 0 |
|          | 0 | 0 | 0        | 0 | 0 | 0        | 0 | 0 |
|          | 0 | 0 | 0        | 0 | 0 | 0        | 0 | 0 |
|          | 0 | 0 | 0        | 0 | 0 | 0        | 0 | 0 |
|          | 0 | 0 | 0        | 0 | 0 | 0        | 0 | 0 |
|          | 0 | 0 | 0        | 0 | 0 | 0        | 0 | 0 |
|          | 0 | 0 | 0        | 0 | 0 | 0        | 0 | 0 |
|          | 0 | 0 | 0        | 0 | 0 | 0        | 0 | 0 |
|          | 0 | 0 | 0        | 0 | 0 | 0        | 0 | 0 |
|          | 0 | 0 | 0        | 0 | 0 | 0        | 0 | 0 |
|          | 0 | 0 | 0        | 0 | 0 | 0        | 0 | 0 |
|          | 0 | 0 | 0        | 0 | 0 | 0        | 0 | 0 |
|          | 0 | 0 | 3.29E-05 | 0 | 0 | 0        | 0 | 0 |
|          | 0 | 0 | 0        | 0 | 0 | 0        | 0 | 0 |
|          | 0 | 0 | 0        | 0 | 0 | 0        | 0 | 0 |
|          | 0 | 0 | 0        | 0 | 0 | 0        | 0 | 0 |
|          | 0 | 0 | 6.57E-05 | 0 | 0 | 6.57E-05 | 0 | 0 |
|          | 0 | 0 | 0        | 0 | 0 | 0        | 0 | 0 |
| 3.29E-05 | 0 | 0 | 0        | 0 | 0 | 0        | 0 | 0 |
|          | 0 | 0 | 0        | 0 | 0 | 0        | 0 | 0 |
|          | 0 | 0 | 0        | 0 | 0 | 0        | 0 | 0 |
|          | 0 | 0 | 0        | 0 | 0 | 0        | 0 | 0 |
|          | 0 | 0 | 0        | 0 | 0 | 0        | 0 | 0 |
|          | 0 | 0 | 0        | 0 | 0 | 0        | 0 | 0 |
|          | 0 | 0 | 0        | 0 | 0 | 0        | 0 | 0 |
|          | 0 | 0 | 0        | 0 | 0 | 0        | 0 | 0 |
|          | 0 | 0 | 0        | 0 | 0 | 0        | 0 | 0 |
|          | 0 | 0 | 0        | 0 | 0 | 0        | 0 | 0 |
|          | 0 | 0 | 0        | 0 | 0 | 0        | 0 | 0 |
|          | 0 | 0 | 0        | 0 | 0 | 0        | 0 | 0 |
|          | 0 | 0 | 0        | 0 | 0 | 0        | 0 | 0 |
|          | 0 | 0 | 0        | 0 | 0 | 0        | 0 | 0 |
|          | 0 | 0 | 0        | 0 | 0 | 0        | 0 | 0 |
|          | 0 | 0 | 0        | 0 | 0 | 0        | 0 | 0 |
|          | 0 | 0 | 0        | 0 | 0 | 0        | 0 | 0 |
|          | 0 | 0 | 0        | 0 | 0 | 0        | 0 | 0 |
|          | 0 | 0 | 0        | 0 | 0 | 0        | 0 | 0 |
| 0.00023  | 0 | 0 | 0        | 0 | 0 | 0        | 0 | 0 |
|          | 0 | 0 | 0        | 0 | 0 | 0        | 0 | 0 |
|          | 0 | 0 | 0        | 0 | 0 | 0        | 0 | 0 |
| 6.57E-05 | 0 | 0 | 0        | 0 | 0 | 0        | 0 | 0 |
|          | 0 | 0 | 0        | 0 | 0 | 0        | 0 | 0 |
| 6.57E-05 | 0 | 0 | 0        | 0 | 0 | 0        | 0 | 0 |
|          | 0 | 0 | 0        | 0 | 0 | 0        | 0 | 0 |





|          |   |   |   |          |   |   |   |   |
|----------|---|---|---|----------|---|---|---|---|
| 0        | 0 | 0 | 0 | 0        | 0 | 0 | 0 | 0 |
| 0        | 0 | 0 | 0 | 0        | 0 | 0 | 0 | 0 |
| 0        | 0 | 0 | 0 | 0        | 0 | 0 | 0 | 0 |
| 0        | 0 | 0 | 0 | 0        | 0 | 0 | 0 | 0 |
| 0        | 0 | 0 | 0 | 0        | 0 | 0 | 0 | 0 |
| 0        | 0 | 0 | 0 | 0        | 0 | 0 | 0 | 0 |
| 0        | 0 | 0 | 0 | 0        | 0 | 0 | 0 | 0 |
| 0        | 0 | 0 | 0 | 0        | 0 | 0 | 0 | 0 |
| 0        | 0 | 0 | 0 | 0        | 0 | 0 | 0 | 0 |
| 0        | 0 | 0 | 0 | 0        | 0 | 0 | 0 | 0 |
| 0        | 0 | 0 | 0 | 0        | 0 | 0 | 0 | 0 |
| 0        | 0 | 0 | 0 | 0        | 0 | 0 | 0 | 0 |
| 0        | 0 | 0 | 0 | 0        | 0 | 0 | 0 | 0 |
| 0        | 0 | 0 | 0 | 0        | 0 | 0 | 0 | 0 |
| 0        | 0 | 0 | 0 | 0        | 0 | 0 | 0 | 0 |
| 0        | 0 | 0 | 0 | 0        | 0 | 0 | 0 | 0 |
| 0        | 0 | 0 | 0 | 0        | 0 | 0 | 0 | 0 |
| 0        | 0 | 0 | 0 | 0        | 0 | 0 | 0 | 0 |
| 0        | 0 | 0 | 0 | 0        | 0 | 0 | 0 | 0 |
| 0        | 0 | 0 | 0 | 0        | 0 | 0 | 0 | 0 |
| 0        | 0 | 0 | 0 | 0        | 0 | 0 | 0 | 0 |
| 0        | 0 | 0 | 0 | 0        | 0 | 0 | 0 | 0 |
| 0        | 0 | 0 | 0 | 0        | 0 | 0 | 0 | 0 |
| 0        | 0 | 0 | 0 | 0        | 0 | 0 | 0 | 0 |
| 0        | 0 | 0 | 0 | 0        | 0 | 0 | 0 | 0 |
| 0        | 0 | 0 | 0 | 0        | 0 | 0 | 0 | 0 |
| 0        | 0 | 0 | 0 | 0        | 0 | 0 | 0 | 0 |
| 0        | 0 | 0 | 0 | 0        | 0 | 0 | 0 | 0 |
| 0        | 0 | 0 | 0 | 0        | 0 | 0 | 0 | 0 |
| 0        | 0 | 0 | 0 | 0        | 0 | 0 | 0 | 0 |
| 0        | 0 | 0 | 0 | 0        | 0 | 0 | 0 | 0 |
| 0        | 0 | 0 | 0 | 0        | 0 | 0 | 0 | 0 |
| 0        | 0 | 0 | 0 | 0        | 0 | 0 | 0 | 0 |
| 0        | 0 | 0 | 0 | 0        | 0 | 0 | 0 | 0 |
| 0.000164 | 0 | 0 | 0 | 0        | 0 | 0 | 0 | 0 |
| 0        | 0 | 0 | 0 | 0        | 0 | 0 | 0 | 0 |
| 0        | 0 | 0 | 0 | 6.57E-05 | 0 | 0 | 0 | 0 |
| 0        | 0 | 0 | 0 | 0        | 0 | 0 | 0 | 0 |
| 0        | 0 | 0 | 0 | 0        | 0 | 0 | 0 | 0 |
| 0        | 0 | 0 | 0 | 0        | 0 | 0 | 0 | 0 |
| 0        | 0 | 0 | 0 | 0        | 0 | 0 | 0 | 0 |
| 0        | 0 | 0 | 0 | 0        | 0 | 0 | 0 | 0 |
| 0        | 0 | 0 | 0 | 0        | 0 | 0 | 0 | 0 |
| 0        | 0 | 0 | 0 | 0        | 0 | 0 | 0 | 0 |
| 0        | 0 | 0 | 0 | 0        | 0 | 0 | 0 | 0 |
| 0        | 0 | 0 | 0 | 0        | 0 | 0 | 0 | 0 |
| 0        | 0 | 0 | 0 | 0        | 0 | 0 | 0 | 0 |
| 0        | 0 | 0 | 0 | 0        | 0 | 0 | 0 | 0 |
| 0        | 0 | 0 | 0 | 0        | 0 | 0 | 0 | 0 |
| 0        | 0 | 0 | 0 | 0        | 0 | 0 | 0 | 0 |
| 0        | 0 | 0 | 0 | 0        | 0 | 0 | 0 | 0 |
| 0        | 0 | 0 | 0 | 0        | 0 | 0 | 0 | 0 |
| 0        | 0 | 0 | 0 | 0        | 0 | 0 | 0 | 0 |
| 0.000164 | 0 | 0 | 0 | 3.29E-05 | 0 | 0 | 0 | 0 |









0 0 0 0 0 0 0 0 0  
0 0 0 0 0 0 0 0 0  
0 0 0 0 0 0 0 0 0  
0 0 0 0 0 0 0 0 0  
0 0 0 0 0 0 0 0 0  
0 0 0 0 0 0 0 0 0  
0 0 0 0 0 0 0 0 0  
0 0 0 0 0 0 0 0 0  
0 0 0 0 0 0 0 0 0  
0 0 0 0 0 0 0 0 0  
0 0 0 0 0 0 0 0 0  
0 0 0 0 0 0 0 0 0  
0 0 0 0 0 0 0 0 0  
0 0 0 0 0 0 0 0 0  
0 0 0 0 0 0 0 0 0  
0 0 0 0 0 0 0 0 0  
0 0 0 0 0 0 0 0 0  
0 0 0 0 0 0 0 0 0  
0 0 0 0 0 0 0 0 0  
0 0 0 0 0 0 0 0 0  
0 0 0 0 0 0 0 0 0  
0 0 0 0 0 0 0 0 0  
0 0 0 0 0 0 0 0 0  
0 0 0 0 0 0 0 0 0  
0 0 0 0 0 0 0 0 0  
0 0 0 0 0 0 0 0 0  
0 0 0 0 0 0 0 0 0  
0 0 0 0 0 0 0 0 0  
0 0 0 0 0 0 0 0 0  
0 0 0 0 0 0 0 0 0  
0 0 0 0 0 0 0 0 0  
0 0 0 0 0 0 0 0 0  
0 0 0 0 0 0 0 0 0  
0 0 0 0 0 0 0 0 0  
0 0 0 0 0 0 0 0 0  
0 0 0 0 0 0 0 0 0

3.29E-05







































































































































































|   |          |   |   |   |          |          |          |   |
|---|----------|---|---|---|----------|----------|----------|---|
| 0 | 0        | 0 | 0 | 0 | 0        | 0        | 0        | 0 |
| 0 | 0        | 0 | 0 | 0 | 0.000131 | 0        | 9.86E-05 | 0 |
| 0 | 0        | 0 | 0 | 0 | 0        | 0        | 0        | 0 |
| 0 | 0        | 0 | 0 | 0 | 0        | 0        | 0        | 0 |
| 0 | 0        | 0 | 0 | 0 | 0        | 0        | 0        | 0 |
| 0 | 0        | 0 | 0 | 0 | 0        | 0        | 0        | 0 |
| 0 | 0        | 0 | 0 | 0 | 0        | 0        | 0        | 0 |
| 0 | 0        | 0 | 0 | 0 | 0        | 0        | 0        | 0 |
| 0 | 0        | 0 | 0 | 0 | 0        | 0        | 0        | 0 |
| 0 | 0        | 0 | 0 | 0 | 0        | 0        | 0        | 0 |
| 0 | 0        | 0 | 0 | 0 | 0        | 0        | 0        | 0 |
| 0 | 0        | 0 | 0 | 0 | 0        | 0        | 0        | 0 |
| 0 | 0        | 0 | 0 | 0 | 0        | 0        | 0        | 0 |
| 0 | 0        | 0 | 0 | 0 | 0        | 0        | 0        | 0 |
| 0 | 0        | 0 | 0 | 0 | 0        | 0        | 0        | 0 |
| 0 | 0        | 0 | 0 | 0 | 0        | 0        | 0        | 0 |
| 0 | 0        | 0 | 0 | 0 | 0        | 0        | 0        | 0 |
| 0 | 0        | 0 | 0 | 0 | 0        | 0        | 0        | 0 |
| 0 | 0        | 0 | 0 | 0 | 0        | 0        | 0        | 0 |
| 0 | 0        | 0 | 0 | 0 | 0        | 0        | 0        | 0 |
| 0 | 0        | 0 | 0 | 0 | 0        | 0        | 0        | 0 |
| 0 | 0        | 0 | 0 | 0 | 0        | 3.29E-05 | 0        | 0 |
| 0 | 0        | 0 | 0 | 0 | 0        | 0        | 0        | 0 |
| 0 | 0        | 0 | 0 | 0 | 0        | 0        | 0        | 0 |
| 0 | 0        | 0 | 0 | 0 | 0        | 0        | 0        | 0 |
| 0 | 0        | 0 | 0 | 0 | 0        | 0        | 0        | 0 |
| 0 | 0        | 0 | 0 | 0 | 0        | 0        | 0        | 0 |
| 0 | 0        | 0 | 0 | 0 | 0        | 0        | 0        | 0 |
| 0 | 0        | 0 | 0 | 0 | 0.000362 | 0        | 0        | 0 |
| 0 | 0        | 0 | 0 | 0 | 0        | 0        | 0        | 0 |
| 0 | 0        | 0 | 0 | 0 | 0        | 0        | 0        | 0 |
| 0 | 0        | 0 | 0 | 0 | 0        | 0        | 0        | 0 |
| 0 | 0        | 0 | 0 | 0 | 0        | 0        | 0        | 0 |
| 0 | 0        | 0 | 0 | 0 | 0        | 0        | 0        | 0 |
| 0 | 0        | 0 | 0 | 0 | 0        | 0        | 0        | 0 |
| 0 | 0        | 0 | 0 | 0 | 0        | 0        | 0        | 0 |
| 0 | 0        | 0 | 0 | 0 | 0        | 0        | 0        | 0 |
| 0 | 0        | 0 | 0 | 0 | 0        | 0        | 0        | 0 |
| 0 | 0        | 0 | 0 | 0 | 0        | 0        | 0        | 0 |
| 0 | 0        | 0 | 0 | 0 | 0        | 0        | 0        | 0 |
| 0 | 0        | 0 | 0 | 0 | 0        | 0        | 0        | 0 |
| 0 | 0        | 0 | 0 | 0 | 0        | 0        | 0        | 0 |
| 0 | 0        | 0 | 0 | 0 | 0        | 0        | 0        | 0 |
| 0 | 0        | 0 | 0 | 0 | 0        | 0        | 0        | 0 |
| 0 | 0.000493 | 0 | 0 | 0 | 0        | 0.000164 | 0        | 0 |
| 0 | 0        | 0 | 0 | 0 | 0        | 0.000625 | 0        | 0 |
| 0 | 0        | 0 | 0 | 0 | 0        | 0        | 0        | 0 |
| 0 | 0        | 0 | 0 | 0 | 0        | 0        | 0        | 0 |
| 0 | 0        | 0 | 0 | 0 | 0        | 0        | 0        | 0 |
| 0 | 0        | 0 | 0 | 0 | 0        | 0        | 0        | 0 |
| 0 | 0        | 0 | 0 | 0 | 0        | 0        | 0        | 0 |
| 0 | 0        | 0 | 0 | 0 | 0        | 0        | 0        | 0 |
| 0 | 0        | 0 | 0 | 0 | 0        | 0.000197 | 0        | 0 |
| 0 | 0        | 0 | 0 | 0 | 0        | 0.000197 | 0        | 0 |
| 0 | 0        | 0 | 0 | 0 | 0        | 0        | 0        | 0 |
| 0 | 0        | 0 | 0 | 0 | 0        | 0.000164 | 0        | 0 |

















































|          |          |   |   |          |          |   |   |   |
|----------|----------|---|---|----------|----------|---|---|---|
| 0        | 0        | 0 | 0 | 0        | 0        | 0 | 0 | 0 |
| 0        | 0        | 0 | 0 | 0        | 0        | 0 | 0 | 0 |
| 0        | 0        | 0 | 0 | 0        | 0        | 0 | 0 | 0 |
| 0        | 0        | 0 | 0 | 0        | 0        | 0 | 0 | 0 |
| 0        | 0        | 0 | 0 | 0        | 0        | 0 | 0 | 0 |
| 3.29E-05 | 0        | 0 | 0 | 0        | 0        | 0 | 0 | 0 |
| 9.86E-05 | 0        | 0 | 0 | 0        | 0        | 0 | 0 | 0 |
| 0        | 0        | 0 | 0 | 0        | 0        | 0 | 0 | 0 |
| 3.29E-05 | 0        | 0 | 0 | 0        | 0        | 0 | 0 | 0 |
| 0.000559 | 0        | 0 | 0 | 0        | 0        | 0 | 0 | 0 |
| 6.57E-05 | 0        | 0 | 0 | 0        | 0        | 0 | 0 | 0 |
| 0.00046  | 0        | 0 | 0 | 0        | 0        | 0 | 0 | 0 |
| 0.000888 | 0        | 0 | 0 | 0        | 0        | 0 | 0 | 0 |
| 0.000263 | 0        | 0 | 0 | 0        | 0        | 0 | 0 | 0 |
| 0.001085 | 0        | 0 | 0 | 0        | 0        | 0 | 0 | 0 |
| 3.29E-05 | 0        | 0 | 0 | 0        | 0        | 0 | 0 | 0 |
| 0        | 0        | 0 | 0 | 0        | 0        | 0 | 0 | 0 |
| 0        | 0        | 0 | 0 | 0        | 0        | 0 | 0 | 0 |
| 0        | 0        | 0 | 0 | 0        | 0        | 0 | 0 | 0 |
| 0        | 0        | 0 | 0 | 0        | 0        | 0 | 0 | 0 |
| 0        | 0        | 0 | 0 | 0        | 0        | 0 | 0 | 0 |
| 0        | 0        | 0 | 0 | 0        | 0        | 0 | 0 | 0 |
| 0.00023  | 0        | 0 | 0 | 0        | 0        | 0 | 0 | 0 |
| 3.29E-05 | 0        | 0 | 0 | 0        | 0        | 0 | 0 | 0 |
| 0        | 0        | 0 | 0 | 0        | 0        | 0 | 0 | 0 |
| 0        | 0        | 0 | 0 | 0        | 0        | 0 | 0 | 0 |
| 0.000855 | 0        | 0 | 0 | 0        | 0        | 0 | 0 | 0 |
| 0        | 0        | 0 | 0 | 0        | 0        | 0 | 0 | 0 |
| 0.001775 | 0.000164 | 0 | 0 | 0        | 0        | 0 | 0 | 0 |
| 3.29E-05 | 3.29E-05 | 0 | 0 | 0        | 0        | 0 | 0 | 0 |
| 0.00023  | 0        | 0 | 0 | 3.29E-05 | 0        | 0 | 0 | 0 |
| 0        | 0        | 0 | 0 | 0        | 0        | 0 | 0 | 0 |
| 0.000427 | 0        | 0 | 0 | 0        | 0        | 0 | 0 | 0 |
| 0.001512 | 0        | 0 | 0 | 0        | 0        | 0 | 0 | 0 |
| 0        | 0        | 0 | 0 | 0        | 0        | 0 | 0 | 0 |
| 3.29E-05 | 0        | 0 | 0 | 0        | 0        | 0 | 0 | 0 |
| 3.29E-05 | 0        | 0 | 0 | 3.29E-05 | 0        | 0 | 0 | 0 |
| 0        | 0        | 0 | 0 | 0        | 0        | 0 | 0 | 0 |
| 0.000197 | 0        | 0 | 0 | 0        | 0        | 0 | 0 | 0 |
| 6.57E-05 | 0        | 0 | 0 | 0        | 0        | 0 | 0 | 0 |
| 6.57E-05 | 0        | 0 | 0 | 0        | 0        | 0 | 0 | 0 |
| 6.57E-05 | 0.000329 | 0 | 0 | 0        | 0        | 0 | 0 | 0 |
| 0.000559 | 0.00503  | 0 | 0 | 0        | 0        | 0 | 0 | 0 |
| 0.001644 | 0        | 0 | 0 | 0        | 0        | 0 | 0 | 0 |
| 0.000756 | 0.003024 | 0 | 0 | 0        | 0        | 0 | 0 | 0 |
| 0.000427 | 0.000657 | 0 | 0 | 0        | 0        | 0 | 0 | 0 |
| 6.57E-05 | 6.57E-05 | 0 | 0 | 0        | 0.000197 | 0 | 0 | 0 |















|          |          |   |   |          |   |   |   |          |
|----------|----------|---|---|----------|---|---|---|----------|
| 6.57E-05 | 0        | 0 | 0 | 0        | 0 | 0 | 0 | 0        |
| 0.000329 | 0        | 0 | 0 | 0        | 0 | 0 | 0 | 0        |
| 0.004471 | 0        | 0 | 0 | 0        | 0 | 0 | 0 | 0        |
| 3.29E-05 | 0        | 0 | 0 | 0        | 0 | 0 | 0 | 0        |
| 0.000427 | 0        | 0 | 0 | 0        | 0 | 0 | 0 | 0        |
| 0.00023  | 0        | 0 | 0 | 0        | 0 | 0 | 0 | 0        |
| 0.000164 | 0        | 0 | 0 | 0        | 0 | 0 | 0 | 0        |
| 6.57E-05 | 0        | 0 | 0 | 0        | 0 | 0 | 0 | 0        |
| 0        | 0        | 0 | 0 | 0        | 0 | 0 | 0 | 0        |
| 3.29E-05 | 0        | 0 | 0 | 0        | 0 | 0 | 0 | 0        |
| 0.000197 | 0        | 0 | 0 | 0        | 0 | 0 | 0 | 0        |
| 0        | 0        | 0 | 0 | 0        | 0 | 0 | 0 | 0        |
| 0        | 0        | 0 | 0 | 0        | 0 | 0 | 0 | 0        |
| 0.000263 | 0        | 0 | 0 | 0        | 0 | 0 | 0 | 0        |
| 0        | 0        | 0 | 0 | 0        | 0 | 0 | 0 | 0        |
| 3.29E-05 | 0        | 0 | 0 | 0        | 0 | 0 | 0 | 0        |
| 6.57E-05 | 0        | 0 | 0 | 0        | 0 | 0 | 0 | 0        |
| 3.29E-05 | 0        | 0 | 0 | 0        | 0 | 0 | 0 | 0        |
| 3.29E-05 | 0        | 0 | 0 | 0        | 0 | 0 | 0 | 0        |
| 0.000427 | 0        | 0 | 0 | 0        | 0 | 0 | 0 | 0        |
| 6.57E-05 | 0        | 0 | 0 | 0        | 0 | 0 | 0 | 0        |
| 0.00023  | 0        | 0 | 0 | 0        | 0 | 0 | 0 | 0        |
| 0.000164 | 0        | 0 | 0 | 0        | 0 | 0 | 0 | 0        |
| 3.29E-05 | 0        | 0 | 0 | 0        | 0 | 0 | 0 | 0        |
| 0.000296 | 0        | 0 | 0 | 0        | 0 | 0 | 0 | 0        |
| 0        | 0        | 0 | 0 | 0        | 0 | 0 | 0 | 0        |
| 0        | 0        | 0 | 0 | 0        | 0 | 0 | 0 | 0        |
| 0        | 0        | 0 | 0 | 0        | 0 | 0 | 0 | 0        |
| 0        | 0        | 0 | 0 | 0        | 0 | 0 | 0 | 0        |
| 0        | 0        | 0 | 0 | 0        | 0 | 0 | 0 | 0        |
| 0        | 0        | 0 | 0 | 0        | 0 | 0 | 0 | 0        |
| 0        | 0        | 0 | 0 | 0        | 0 | 0 | 0 | 0        |
| 0        | 0        | 0 | 0 | 0        | 0 | 0 | 0 | 0        |
| 0        | 0        | 0 | 0 | 3.29E-05 | 0 | 0 | 0 | 0        |
| 0        | 0        | 0 | 0 | 0        | 0 | 0 | 0 | 0        |
| 0.000329 | 0        | 0 | 0 | 0        | 0 | 0 | 0 | 0        |
| 0.000723 | 0        | 0 | 0 | 0        | 0 | 0 | 0 | 0        |
| 3.29E-05 | 0        | 0 | 0 | 0        | 0 | 0 | 0 | 0        |
| 0.00812  | 3.29E-05 | 0 | 0 | 0        | 0 | 0 | 0 | 0        |
| 0.000592 | 0.000164 | 0 | 0 | 0        | 0 | 0 | 0 | 0        |
| 0.000164 | 3.29E-05 | 0 | 0 | 0        | 0 | 0 | 0 | 0        |
| 0        | 0        | 0 | 0 | 0        | 0 | 0 | 0 | 0        |
| 6.57E-05 | 0        | 0 | 0 | 0        | 0 | 0 | 0 | 0        |
| 0.003222 | 0        | 0 | 0 | 0        | 0 | 0 | 0 | 6.57E-05 |
| 0.000131 | 3.29E-05 | 0 | 0 | 0        | 0 | 0 | 0 | 0        |
| 0.000592 | 0        | 0 | 0 | 0        | 0 | 0 | 0 | 0        |
| 0        | 3.29E-05 | 0 | 0 | 0        | 0 | 0 | 0 | 0        |

|          |          |   |   |   |   |   |   |   |
|----------|----------|---|---|---|---|---|---|---|
| 0.002038 | 0.000131 | 0 | 0 | 0 | 0 | 0 | 0 | 0 |
| 0.001446 | 0        | 0 | 0 | 0 | 0 | 0 | 0 | 0 |
| 0.006805 | 0        | 0 | 0 | 0 | 0 | 0 | 0 | 0 |
| 0.001972 | 0        | 0 | 0 | 0 | 0 | 0 | 0 | 0 |
| 0.019692 | 0.000131 | 0 | 0 | 0 | 0 | 0 | 0 | 0 |
| 0        | 0        | 0 | 0 | 0 | 0 | 0 | 0 | 0 |
| 0.000164 | 0        | 0 | 0 | 0 | 0 | 0 | 0 | 0 |
| 0        | 0        | 0 | 0 | 0 | 0 | 0 | 0 | 0 |
| 0        | 0        | 0 | 0 | 0 | 0 | 0 | 0 | 0 |
| 3.29E-05 | 0        | 0 | 0 | 0 | 0 | 0 | 0 | 0 |
| 0        | 3.29E-05 | 0 | 0 | 0 | 0 | 0 | 0 | 0 |
| 0        | 0        | 0 | 0 | 0 | 0 | 0 | 0 | 0 |
| 0.000296 | 0        | 0 | 0 | 0 | 0 | 0 | 0 | 0 |
| 0        | 0        | 0 | 0 | 0 | 0 | 0 | 0 | 0 |
| 0        | 0        | 0 | 0 | 0 | 0 | 0 | 0 | 0 |
| 6.57E-05 | 0        | 0 | 0 | 0 | 0 | 0 | 0 | 0 |
| 9.86E-05 | 0        | 0 | 0 | 0 | 0 | 0 | 0 | 0 |
| 3.29E-05 | 0        | 0 | 0 | 0 | 0 | 0 | 0 | 0 |
| 0.000131 | 0        | 0 | 0 | 0 | 0 | 0 | 0 | 0 |
| 0.00092  | 0        | 0 | 0 | 0 | 0 | 0 | 0 | 0 |
| 0.001479 | 3.29E-05 | 0 | 0 | 0 | 0 | 0 | 0 | 0 |
| 0.023045 | 6.57E-05 | 0 | 0 | 0 | 0 | 0 | 0 | 0 |
| 0.00046  | 0.000197 | 0 | 0 | 0 | 0 | 0 | 0 | 0 |





























| k_Bacteri |
|-----------|-----------|-----------|-----------|-----------|-----------|-----------|-----------|-----------|
| 3.29E-05  | 3.29E-05  | 0         | 0.013413  | 0         | 0         | 0         | 0         | 0         |
| 0         | 6.57E-05  | 0         | 0.001578  | 0         | 0         | 0         | 0         | 0         |
| 0         | 0.00023   | 0         | 0.004931  | 0         | 0         | 0         | 0         | 0         |
| 0         | 0         | 0         | 0.005654  | 6.57E-05  | 0         | 0         | 0         | 0         |
| 0         | 0         | 0         | 0.003452  | 0         | 0         | 0         | 0         | 0         |
| 0         | 0         | 0         | 0.00069   | 0         | 0         | 0         | 0         | 0         |
| 0         | 0         | 0         | 0.000822  | 0         | 0         | 0         | 0         | 0         |
| 0         | 3.29E-05  | 0         | 0.000197  | 0         | 0         | 0         | 0         | 0         |
| 0         | 6.57E-05  | 0         | 0.004833  | 6.57E-05  | 0         | 0         | 0         | 0         |
| 0         | 9.86E-05  | 0         | 0.000131  | 3.29E-05  | 0         | 0         | 0         | 0         |
| 0         | 0         | 0         | 3.29E-05  | 3.29E-05  | 0         | 0         | 0         | 0         |
| 0         | 0         | 3.29E-05  | 0.001019  | 0         | 0         | 0         | 0         | 0         |
| 0.000296  | 0.005326  | 6.57E-05  | 0.000592  | 6.57E-05  | 0         | 0         | 0         | 0         |
| 0         | 0.000131  | 0         | 0         | 0.00286   | 0         | 0         | 0         | 0         |
| 0         | 0         | 0         | 3.29E-05  | 0         | 0         | 0         | 0         | 0         |
| 0         | 0         | 0         | 0         | 0         | 0         | 0         | 0         | 0         |
| 0         | 0         | 0         | 3.29E-05  | 0         | 0         | 0         | 0         | 0         |
| 0         | 0         | 0         | 3.29E-05  | 0         | 0         | 0         | 0         | 0         |
| 0         | 0         | 0         | 3.29E-05  | 0.000329  | 0         | 0         | 0         | 0         |
| 0         | 0         | 0         | 3.29E-05  | 9.86E-05  | 0         | 0         | 0         | 0         |
| 0         | 3.29E-05  | 0.00023   | 0         | 0         | 0         | 0         | 0         | 0         |
| 0         | 9.86E-05  | 6.57E-05  | 0.000197  | 0         | 0         | 0         | 0         | 0         |
| 0         | 6.57E-05  | 0         | 0         | 0         | 0         | 0         | 0         | 0         |
| 0         | 0.000197  | 6.57E-05  | 0.004142  | 0         | 0         | 0         | 0         | 0         |
| 0         | 0         | 6.57E-05  | 0.01098   | 0         | 0         | 0         | 0         | 0         |
| 0         | 0.000164  | 3.29E-05  | 0.009665  | 0         | 0         | 0         | 0         | 0         |
| 0         | 0.000131  | 0.00046   | 3.29E-05  | 0         | 0         | 0         | 0         | 0         |
| 0         | 0.000131  | 0         | 6.57E-05  | 0         | 0         | 0         | 0         | 0         |
| 0         | 0.000394  | 0         | 6.57E-05  | 0         | 0         | 0         | 0         | 0         |
| 0         | 3.29E-05  | 0         | 9.86E-05  | 0         | 0         | 0         | 0         | 0         |
| 0         | 3.29E-05  | 0         | 0.000296  | 0         | 0         | 0         | 0         | 0         |
| 0         | 6.57E-05  | 0         | 0.000526  | 6.57E-05  | 0         | 0         | 0         | 0         |
| 3.29E-05  | 9.86E-05  | 0         | 3.29E-05  | 6.57E-05  | 0         | 0         | 0         | 0         |
| 0         | 9.86E-05  | 0.000329  | 0.000789  | 0         | 0         | 0         | 0         | 0         |
| 0         | 0         | 0.001052  | 0.00332   | 0         | 0         | 0         | 0         | 0         |
| 0         | 9.86E-05  | 0.000263  | 0.001019  | 0         | 0         | 0         | 0         | 0         |
| 0         | 0.000263  | 0.000131  | 0.005523  | 0         | 0         | 0         | 0         | 0         |
| 0         | 0.000526  | 9.86E-05  | 0.016404  | 0         | 0         | 0         | 0         | 0         |
| 0         | 9.86E-05  | 6.57E-05  | 0.006805  | 0         | 0         | 0         | 0         | 0         |
| 0         | 9.86E-05  | 0.00023   | 0.025182  | 0         | 0         | 0         | 0         | 0         |
| 0         | 0         | 6.57E-05  | 0.002992  | 0         | 0         | 0         | 0         | 0         |
| 0         | 0.000263  | 0.000164  | 0.006575  | 6.57E-05  | 0         | 0         | 0         | 0         |
| 3.29E-05  | 0.000131  | 0.000394  | 0.01121   | 0         | 0         | 0         | 0         | 0         |
| 0         | 0         | 3.29E-05  | 0.056511  | 0         | 0         | 0         | 0         | 0         |





|          |          |          |          |          |   |   |   |   |
|----------|----------|----------|----------|----------|---|---|---|---|
| 0        | 0        | 0        | 3.29E-05 | 0        | 0 | 0 | 0 | 0 |
| 0        | 0        | 0        | 3.29E-05 | 0        | 0 | 0 | 0 | 0 |
| 0        | 0        | 0        | 6.57E-05 | 0        | 0 | 0 | 0 | 0 |
| 0        | 0        | 0.000197 | 0.076432 | 3.29E-05 | 0 | 0 | 0 | 0 |
| 0        | 0        | 0        | 3.29E-05 | 0        | 0 | 0 | 0 | 0 |
| 0        | 0        | 0        | 0.011572 | 0        | 0 | 0 | 0 | 0 |
| 0        | 0        | 0        | 0.001249 | 0        | 0 | 0 | 0 | 0 |
| 0        | 0        | 0        | 0.001085 | 0        | 0 | 0 | 0 | 0 |
| 0        | 0        | 0        | 0.000526 | 0        | 0 | 0 | 0 | 0 |
| 0        | 0        | 0        | 0.023176 | 0        | 0 | 0 | 0 | 0 |
| 0        | 0        | 0        | 0.064499 | 0        | 0 | 0 | 0 | 0 |
| 0        | 0        | 0        | 0.021631 | 0        | 0 | 0 | 0 | 0 |
| 0        | 0        | 0        | 0.023738 | 0        | 0 | 0 | 0 | 0 |
| 0        | 0        | 0.00023  | 0.001052 | 6.57E-05 | 0 | 0 | 0 | 0 |
| 0        | 0        | 9.86E-05 | 0        | 0        | 0 | 0 | 0 | 0 |
| 0        | 0        | 0.000164 | 3.29E-05 | 0        | 0 | 0 | 0 | 0 |
| 0        | 0        | 0        | 0        | 0        | 0 | 0 | 0 | 0 |
| 0        | 0        | 0.000362 | 0        | 0        | 0 | 0 | 0 | 0 |
| 0        | 0        | 0        | 3.29E-05 | 0        | 0 | 0 | 0 | 0 |
| 0        | 0        | 6.57E-05 | 0.000131 | 0        | 0 | 0 | 0 | 0 |
| 0        | 0        | 0.00263  | 0.000329 | 0.000164 | 0 | 0 | 0 | 0 |
| 0        | 0        | 3.29E-05 | 0.008087 | 0        | 0 | 0 | 0 | 0 |
| 0        | 3.29E-05 | 9.86E-05 | 0.001249 | 0        | 0 | 0 | 0 | 0 |
| 0        | 9.86E-05 | 0        | 0.016996 | 0        | 0 | 0 | 0 | 0 |
| 0        | 3.29E-05 | 0        | 0.00332  | 0        | 0 | 0 | 0 | 0 |
| 0        | 0        | 3.29E-05 | 0.009566 | 0        | 0 | 0 | 0 | 0 |
| 0        | 0        | 0        | 0.000789 | 0        | 0 | 0 | 0 | 0 |
| 0        | 3.29E-05 | 0        | 0.001282 | 0        | 0 | 0 | 0 | 0 |
| 0        | 0        | 0        | 6.57E-05 | 0        | 0 | 0 | 0 | 0 |
| 0        | 0        | 0        | 0.001151 | 0        | 0 | 0 | 0 | 0 |
| 0        | 0        | 0        | 9.86E-05 | 0        | 0 | 0 | 0 | 0 |
| 0        | 6.57E-05 | 0        | 0.002992 | 0        | 0 | 0 | 0 | 0 |
| 0        | 0.000197 | 0.000362 | 0.010027 | 0        | 0 | 0 | 0 | 0 |
| 0        | 0.000164 | 0.000362 | 0.002531 | 0        | 0 | 0 | 0 | 0 |
| 0        | 0.000131 | 0.000329 | 0.007824 | 3.29E-05 | 0 | 0 | 0 | 0 |
| 0        | 6.57E-05 | 0.000296 | 0.002005 | 3.29E-05 | 0 | 0 | 0 | 0 |
| 0.000164 | 0.000657 | 0.002104 | 0.358723 | 0        | 0 | 0 | 0 | 0 |
| 0        | 0        | 0        | 0.001282 | 0        | 0 | 0 | 0 | 0 |
| 0        | 0        | 6.57E-05 | 0.005293 | 0        | 0 | 0 | 0 | 0 |
| 0        | 0        | 0.000131 | 0.003419 | 0        | 0 | 0 | 0 | 0 |
| 6.57E-05 | 0.001183 | 0.004339 | 0.068082 | 9.86E-05 | 0 | 0 | 0 | 0 |
| 3.29E-05 | 0.000263 | 0.000625 | 0.087577 | 0        | 0 | 0 | 0 | 0 |
| 0        | 3.29E-05 | 6.57E-05 | 0.017851 | 0        | 0 | 0 | 0 | 0 |
| 0        | 0.000197 | 9.86E-05 | 0.00812  | 0        | 0 | 0 | 0 | 0 |
| 0        | 0.000263 | 3.29E-05 | 0.012295 | 0        | 0 | 0 | 0 | 0 |
| 0        | 9.86E-05 | 0        | 0.00743  | 0        | 0 | 0 | 0 | 0 |
| 0        | 6.57E-05 | 0.000131 | 0.010651 | 0        | 0 | 0 | 0 | 0 |

|          |          |          |          |          |   |   |          |   |
|----------|----------|----------|----------|----------|---|---|----------|---|
| 0        | 6.57E-05 | 3.29E-05 | 0.007693 | 3.29E-05 | 0 | 0 | 0        | 0 |
| 0        | 6.57E-05 | 6.57E-05 | 0.003813 | 0        | 0 | 0 | 0        | 0 |
| 0        | 3.29E-05 | 0        | 0.02413  | 0        | 0 | 0 | 0        | 0 |
| 0        | 0        | 9.86E-05 | 0.015451 | 0        | 0 | 0 | 0        | 0 |
| 0        | 3.29E-05 | 0        | 0.001742 | 0        | 0 | 0 | 0        | 0 |
| 0        | 0        | 0        | 0        | 0        | 0 | 0 | 0        | 0 |
| 0        | 0        | 6.57E-05 | 9.86E-05 | 0        | 0 | 0 | 0        | 0 |
| 0        | 0        | 0        | 0        | 0        | 0 | 0 | 0        | 0 |
| 0        | 0        | 0        | 3.29E-05 | 0        | 0 | 0 | 0        | 0 |
| 0        | 0        | 3.29E-05 | 9.86E-05 | 9.86E-05 | 0 | 0 | 0        | 0 |
| 0        | 0        | 0        | 0        | 0        | 0 | 0 | 0        | 0 |
| 0        | 0        | 0.000394 | 0.000131 | 0        | 0 | 0 | 0        | 0 |
| 0        | 0        | 0.003386 | 9.86E-05 | 0        | 0 | 0 | 0        | 0 |
| 0        | 0        | 0.001578 | 3.29E-05 | 0        | 0 | 0 | 0        | 0 |
| 0        | 0        | 0.001019 | 3.29E-05 | 3.29E-05 | 0 | 0 | 0        | 0 |
| 0        | 0        | 0.000131 | 0.000329 | 0        | 0 | 0 | 0        | 0 |
| 0        | 0        | 0.000526 | 3.29E-05 | 0        | 0 | 0 | 0        | 0 |
| 0        | 0        | 0.000296 | 0.000131 | 0        | 0 | 0 | 0        | 0 |
| 0        | 0        | 0.000394 | 0.000197 | 0        | 0 | 0 | 3.29E-05 | 0 |
| 0        | 0        | 0.001151 | 0.000723 | 0        | 0 | 0 | 0        | 0 |
| 0        | 0        | 0.000164 | 0.000263 | 0.000131 | 0 | 0 | 0        | 0 |
| 0        | 0        | 0.000131 | 6.57E-05 | 0        | 0 | 0 | 0        | 0 |
| 0        | 0.000394 | 0.001216 | 0.007265 | 0        | 0 | 0 | 0        | 0 |
| 3.29E-05 | 0        | 0.000296 | 0.004734 | 0        | 0 | 0 | 0        | 0 |
| 0        | 0        | 6.57E-05 | 0.002038 | 0        | 0 | 0 | 0        | 0 |
| 0        | 3.29E-05 | 3.29E-05 | 0.001052 | 0        | 0 | 0 | 0        | 0 |
| 0        | 0        | 0.003583 | 0.001578 | 0        | 0 | 0 | 0        | 0 |
| 0        | 0        | 0.000855 | 0.000263 | 0        | 0 | 0 | 0        | 0 |
| 0        | 0        | 0.000296 | 0.005819 | 0        | 0 | 0 | 0        | 0 |
| 0        | 0        | 0.000197 | 0.009369 | 6.57E-05 | 0 | 0 | 0        | 0 |
| 0        | 3.29E-05 | 0.000164 | 0.009698 | 0        | 0 | 0 | 0        | 0 |
| 0.000164 | 0.001512 | 0        | 0.073046 | 0.000362 | 0 | 0 | 0        | 0 |
| 3.29E-05 | 0.000888 | 3.29E-05 | 0.05822  | 6.57E-05 | 0 | 0 | 0        | 0 |
| 0        | 0        | 0        | 0.007824 | 0        | 0 | 0 | 0        | 0 |
| 0        | 0        | 3.29E-05 | 0.011605 | 0        | 0 | 0 | 0        | 0 |
| 6.57E-05 | 0.000131 | 0.001348 | 0.028502 | 0        | 0 | 0 | 0        | 0 |
| 0        | 0        | 0        | 0.016733 | 3.29E-05 | 0 | 0 | 0        | 0 |
| 0        | 0.000953 | 0.001414 | 0.02962  | 9.86E-05 | 0 | 0 | 0        | 0 |
| 0        | 0        | 0.000625 | 0.003715 | 0        | 0 | 0 | 0        | 0 |
| 0        | 0        | 3.29E-05 | 0.000362 | 0        | 0 | 0 | 0        | 0 |
| 0        | 3.29E-05 | 0        | 0.019067 | 0        | 0 | 0 | 0        | 0 |
| 0        | 0        | 0.000131 | 0.000394 | 0        | 0 | 0 | 0        | 0 |
| 0        | 0        | 9.86E-05 | 0.003156 | 0        | 0 | 0 | 0        | 0 |
| 0        | 0        | 0        | 0.001381 | 0        | 0 | 0 | 0        | 0 |
| 0        | 0        | 0.000329 | 0.003222 | 0        | 0 | 0 | 0        | 0 |
| 0        | 0        | 0        | 3.29E-05 | 0        | 0 | 0 | 0        | 0 |
| 0        | 0        | 0        | 6.57E-05 | 0        | 0 | 0 | 0        | 0 |

|          |          |          |          |          |   |          |   |          |
|----------|----------|----------|----------|----------|---|----------|---|----------|
| 0        | 0        | 0        | 9.86E-05 | 0        | 0 | 0        | 0 | 0        |
| 0        | 0        | 0        | 0        | 0        | 0 | 0        | 0 | 0        |
| 0        | 0        | 0        | 0        | 0        | 0 | 0        | 0 | 0        |
| 0        | 0        | 0        | 0        | 0        | 0 | 0        | 0 | 0        |
| 0        | 0        | 0        | 3.29E-05 | 0        | 0 | 0        | 0 | 0        |
| 0        | 9.86E-05 | 0.000263 | 0.006608 | 0        | 0 | 0        | 0 | 0        |
| 0        | 0.000394 | 0.000197 | 0.000164 | 0        | 0 | 0        | 0 | 0        |
| 0        | 3.29E-05 | 0        | 0.0048   | 0        | 0 | 0        | 0 | 0        |
| 0        | 0        | 0.000394 | 0.000888 | 3.29E-05 | 0 | 0        | 0 | 0        |
| 0        | 0        | 0.000394 | 0.004142 | 0        | 0 | 6.57E-05 | 0 | 0        |
| 0        | 0        | 0.000131 | 0.001578 | 3.29E-05 | 0 | 0        | 0 | 0        |
| 0        | 0.00023  | 0        | 0.04037  | 0        | 0 | 0        | 0 | 0        |
| 0        | 6.57E-05 | 6.57E-05 | 0.003879 | 0        | 0 | 0        | 0 | 0        |
| 0        | 0.000296 | 0.000197 | 0.011835 | 0        | 0 | 0        | 0 | 0        |
| 0        | 0.000657 | 0.000329 | 0.031625 | 0        | 0 | 0        | 0 | 0        |
| 0        | 0        | 0        | 0.049048 | 0        | 0 | 0        | 0 | 0        |
| 0        | 0        | 0        | 0.095368 | 0        | 0 | 0        | 0 | 0        |
| 0        | 0        | 0        | 0.023439 | 0        | 0 | 0        | 0 | 0        |
| 0        | 0        | 0        | 0.032348 | 0        | 0 | 0        | 0 | 0        |
| 0        | 0        | 0        | 0.024163 | 0        | 0 | 0        | 0 | 0        |
| 0        | 0        | 0        | 0.066636 | 6.57E-05 | 0 | 0        | 0 | 0        |
| 0        | 0        | 0        | 0.076235 | 0        | 0 | 0        | 0 | 0        |
| 0        | 3.29E-05 | 0        | 0.001479 | 0        | 0 | 0        | 0 | 0        |
| 0        | 0        | 0        | 0.000164 | 0        | 0 | 0        | 0 | 0        |
| 0        | 6.57E-05 | 3.29E-05 | 0.002235 | 0        | 0 | 0        | 0 | 0        |
| 0        | 0.000131 | 0.000164 | 0.009566 | 0        | 0 | 0        | 0 | 0        |
| 0        | 0        | 0.000888 | 0.00309  | 9.86E-05 | 0 | 0        | 0 | 0        |
| 0        | 0        | 0        | 0.011473 | 0.000164 | 0 | 0        | 0 | 0        |
| 0        | 0.000164 | 0.000296 | 0.003287 | 0        | 0 | 0        | 0 | 0        |
| 0        | 0        | 3.29E-05 | 0.001775 | 0        | 0 | 0        | 0 | 0        |
| 0        | 6.57E-05 | 9.86E-05 | 0.051349 | 0        | 0 | 0        | 0 | 0        |
| 3.29E-05 | 0        | 0        | 0.614221 | 0        | 0 | 0        | 0 | 0        |
| 0        | 0        | 0        | 0.002334 | 0        | 0 | 0        | 0 | 0        |
| 0        | 0        | 3.29E-05 | 0.016075 | 3.29E-05 | 0 | 0        | 0 | 0        |
| 0        | 0        | 0        | 0.019133 | 0        | 0 | 0        | 0 | 0        |
| 0        | 0        | 0        | 0.0143   | 0        | 0 | 0        | 0 | 0        |
| 0        | 3.29E-05 | 0        | 0.002203 | 0        | 0 | 0        | 0 | 0        |
| 0        | 0        | 0        | 0.138006 | 0        | 0 | 0        | 0 | 0        |
| 3.29E-05 | 0.000131 | 0        | 0.017719 | 0        | 0 | 0        | 0 | 0        |
| 0        | 6.57E-05 | 0.000329 | 0.024524 | 0        | 0 | 0        | 0 | 0        |
| 0        | 3.29E-05 | 3.29E-05 | 0.02219  | 0        | 0 | 0        | 0 | 0        |
| 0        | 0.000427 | 0.001578 | 0.006772 | 0        | 0 | 0        | 0 | 0        |
| 0        | 0.00069  | 0.008843 | 0.047109 | 0        | 0 | 0        | 0 | 0        |
| 0        | 0.000131 | 0.002367 | 0.061803 | 0        | 0 | 0        | 0 | 0        |
| 0        | 6.57E-05 | 0.002959 | 0.052434 | 0        | 0 | 0        | 0 | 3.29E-05 |
| 0        | 0        | 0.001611 | 0.026234 | 6.57E-05 | 0 | 0        | 0 | 0        |
| 0        | 0.000362 | 0.001019 | 0.030179 | 9.86E-05 | 0 | 0        | 0 | 0        |

|          |          |          |          |          |   |   |   |          |
|----------|----------|----------|----------|----------|---|---|---|----------|
| 3.29E-05 | 0.001446 | 0.000263 | 0.030704 | 0        | 0 | 0 | 0 | 3.29E-05 |
| 0        | 6.57E-05 | 0        | 0.014596 | 0        | 0 | 0 | 0 | 0        |
| 0        | 0.001118 | 0.000197 | 0.015714 | 0        | 0 | 0 | 0 | 0        |
| 0        | 3.29E-05 | 0        | 0.008547 | 0        | 0 | 0 | 0 | 0        |
| 0        | 0        | 0        | 0.004635 | 0        | 0 | 0 | 0 | 0        |
| 0        | 0        | 0        | 0.000263 | 0        | 0 | 0 | 0 | 0        |
| 0        | 0        | 9.86E-05 | 0.007134 | 0        | 0 | 0 | 0 | 0        |
| 0        | 0        | 0        | 0        | 6.57E-05 | 0 | 0 | 0 | 0        |
| 0        | 0        | 0        | 0.000131 | 0        | 0 | 0 | 0 | 0        |
| 0        | 0        | 0        | 0.002334 | 3.29E-05 | 0 | 0 | 0 | 0        |
| 0        | 0        | 0        | 0.002203 | 0        | 0 | 0 | 0 | 0        |
| 0        | 0        | 0        | 0.006739 | 0.00046  | 0 | 0 | 0 | 0        |
| 0        | 0        | 0        | 0.000789 | 0        | 0 | 0 | 0 | 0        |
| 0        | 0        | 0        | 0.003386 | 3.29E-05 | 0 | 0 | 0 | 0        |
| 3.29E-05 | 0.001907 | 0.001052 | 0.032184 | 9.86E-05 | 0 | 0 | 0 | 0        |
| 0        | 0.000986 | 0.001972 | 0.024491 | 0        | 0 | 0 | 0 | 0        |
| 0        | 0.000197 | 0.000493 | 0.011966 | 0        | 0 | 0 | 0 | 0        |
| 0        | 0.000427 | 0.000329 | 0.016371 | 3.29E-05 | 0 | 0 | 0 | 3.29E-05 |
| 0        | 0.000329 | 0.000131 | 0.01601  | 6.57E-05 | 0 | 0 | 0 | 0        |
| 0        | 0.001118 | 0.00046  | 0.02265  | 0        | 0 | 0 | 0 | 0        |
| 0        | 0.001216 | 0.000625 | 0.041158 | 0        | 0 | 0 | 0 | 0        |
| 0        | 0.00023  | 0        | 0.020678 | 0        | 0 | 0 | 0 | 3.29E-05 |
| 0        | 0.000197 | 0.000723 | 0.020053 | 0        | 0 | 0 | 0 | 0        |
| 0        | 0.000164 | 0        | 0.027088 | 0        | 0 | 0 | 0 | 0        |
| 0        | 0        | 0        | 3.29E-05 | 0        | 0 | 0 | 0 | 0        |
| 0        | 0        | 0        | 3.29E-05 | 0        | 0 | 0 | 0 | 0        |
| 0        | 0        | 0        | 9.86E-05 | 0        | 0 | 0 | 0 | 0        |
| 0        | 0        | 3.29E-05 | 0        | 0        | 0 | 0 | 0 | 0        |
| 0        | 0        | 0        | 6.57E-05 | 0        | 0 | 0 | 0 | 0        |
| 0        | 0        | 0        | 0        | 0        | 0 | 0 | 0 | 0        |
| 0        | 0        | 0        | 3.29E-05 | 0        | 0 | 0 | 0 | 0        |
| 0        | 0        | 0        | 0        | 0        | 0 | 0 | 0 | 0        |
| 0        | 0.000131 | 0.000362 | 0.001118 | 0        | 0 | 0 | 0 | 0        |
| 0        | 0        | 0.000986 | 0.000559 | 0        | 0 | 0 | 0 | 0        |
| 0        | 3.29E-05 | 0.00023  | 0.101022 | 0        | 0 | 0 | 0 | 0        |
| 0        | 6.57E-05 | 0.00023  | 0.034748 | 0        | 0 | 0 | 0 | 0        |
| 0        | 0.00046  | 0.00069  | 0.056938 | 0        | 0 | 0 | 0 | 0        |
| 0        | 6.57E-05 | 0.000756 | 0.003419 | 9.86E-05 | 0 | 0 | 0 | 0        |
| 3.29E-05 | 0        | 0        | 0.009172 | 0        | 0 | 0 | 0 | 0        |
| 0        | 0        | 3.29E-05 | 0.016832 | 0        | 0 | 0 | 0 | 0        |
| 0        | 0        | 0        | 0.037509 | 0        | 0 | 0 | 0 | 0        |
| 0        | 0        | 0.000164 | 0.011506 | 0        | 0 | 0 | 0 | 0        |
| 0        | 0        | 9.86E-05 | 0.014399 | 3.29E-05 | 0 | 0 | 0 | 0        |
| 3.29E-05 | 3.29E-05 | 0.000197 | 0.845261 | 0.000164 | 0 | 0 | 0 | 0        |
| 0        | 0        | 0        | 0.069233 | 0        | 0 | 0 | 0 | 0        |
| 0        | 0        | 9.86E-05 | 0.64394  | 6.57E-05 | 0 | 0 | 0 | 0        |
| 0        | 0        | 0        | 0.888721 | 0        | 0 | 0 | 0 | 0        |

|          |          |          |          |          |   |   |   |   |
|----------|----------|----------|----------|----------|---|---|---|---|
| 0        | 0.000263 | 6.57E-05 | 0.038989 | 6.57E-05 | 0 | 0 | 0 | 0 |
| 0        | 3.29E-05 | 0.000329 | 0.236628 | 0        | 0 | 0 | 0 | 0 |
| 0        | 0        | 9.86E-05 | 0.055853 | 0        | 0 | 0 | 0 | 0 |
| 0        | 0        | 0        | 0.008777 | 6.57E-05 | 0 | 0 | 0 | 0 |
| 6.57E-05 | 0.000822 | 3.29E-05 | 0.009271 | 0        | 0 | 0 | 0 | 0 |
| 0        | 0.000131 | 0.000559 | 0.036293 | 0        | 0 | 0 | 0 | 0 |
| 0        | 0        | 0        | 0.00092  | 0        | 0 | 0 | 0 | 0 |
| 0        | 0        | 0        | 3.29E-05 | 0        | 0 | 0 | 0 | 0 |
| 0        | 0.000329 | 0        | 9.86E-05 | 0        | 0 | 0 | 0 | 0 |
| 0        | 0        | 0        | 3.29E-05 | 0        | 0 | 0 | 0 | 0 |
| 0        | 0        | 0        | 0.738453 | 0        | 0 | 0 | 0 | 0 |
| 0        | 0        | 0        | 0.042934 | 0        | 0 | 0 | 0 | 0 |
| 0        | 3.29E-05 | 0        | 3.29E-05 | 0        | 0 | 0 | 0 | 0 |
| 0        | 3.29E-05 | 0        | 3.29E-05 | 0        | 0 | 0 | 0 | 0 |
| 0        | 0        | 0        | 0.010783 | 0        | 0 | 0 | 0 | 0 |
| 0        | 6.57E-05 | 0        | 0.014958 | 0        | 0 | 0 | 0 | 0 |
| 0        | 0        | 0        | 0.001841 | 0        | 0 | 0 | 0 | 0 |
| 0        | 0        | 0        | 0.002203 | 0        | 0 | 0 | 0 | 0 |
| 0        | 3.29E-05 | 0        | 0.011276 | 0        | 0 | 0 | 0 | 0 |
| 0        | 3.29E-05 | 0        | 0.003353 | 0        | 0 | 0 | 0 | 0 |
| 0        | 0        | 0        | 0.001874 | 0        | 0 | 0 | 0 | 0 |
| 0        | 0        | 0        | 0.002005 | 0        | 0 | 0 | 0 | 0 |
| 0        | 0.000131 | 0        | 0.012032 | 0        | 0 | 0 | 0 | 0 |
| 0        | 0        | 0        | 0.001052 | 0        | 0 | 0 | 0 | 0 |
| 0        | 0        | 0        | 0        | 0        | 0 | 0 | 0 | 0 |
| 0        | 0        | 0        | 9.86E-05 | 0        | 0 | 0 | 0 | 0 |
| 0        | 0        | 0        | 0        | 0        | 0 | 0 | 0 | 0 |
| 0        | 0        | 0        | 6.57E-05 | 0        | 0 | 0 | 0 | 0 |
| 0        | 9.86E-05 | 3.29E-05 | 0.036194 | 0        | 0 | 0 | 0 | 0 |
| 0        | 0        | 0        | 0.001052 | 0        | 0 | 0 | 0 | 0 |
| 0        | 0        | 0        | 0.000855 | 0        | 0 | 0 | 0 | 0 |
| 0        | 0        | 0        | 3.29E-05 | 0        | 0 | 0 | 0 | 0 |
| 0        | 3.29E-05 | 0.00046  | 0.04724  | 0        | 0 | 0 | 0 | 0 |
| 0        | 3.29E-05 | 9.86E-05 | 0.010158 | 0        | 0 | 0 | 0 | 0 |
| 0        | 0        | 3.29E-05 | 0.002992 | 0        | 0 | 0 | 0 | 0 |
| 0        | 0        | 0        | 0.000625 | 0        | 0 | 0 | 0 | 0 |
| 0        | 0.000657 | 0.001151 | 0.032578 | 0        | 0 | 0 | 0 | 0 |
| 0        | 6.57E-05 | 0.000756 | 0.000526 | 9.86E-05 | 0 | 0 | 0 | 0 |
| 0        | 0.000559 | 0.000953 | 0.081199 | 0        | 0 | 0 | 0 | 0 |
| 0        | 0        | 0.000164 | 0.012689 | 0        | 0 | 0 | 0 | 0 |
| 0        | 3.29E-05 | 0.000131 | 0.070844 | 0        | 0 | 0 | 0 | 0 |
| 0        | 0        | 6.57E-05 | 0.01716  | 0        | 0 | 0 | 0 | 0 |
| 0        | 0.000394 | 0        | 0.001808 | 3.29E-05 | 0 | 0 | 0 | 0 |
| 0        | 0        | 0.000986 | 9.86E-05 | 6.57E-05 | 0 | 0 | 0 | 0 |
| 3.29E-05 | 0.000723 | 9.86E-05 | 0.000592 | 0        | 0 | 0 | 0 | 0 |
| 0        | 0.000296 | 0.000953 | 0.019889 | 0        | 0 | 0 | 0 | 0 |
| 0        | 0.000526 | 0.000131 | 0.027121 | 0        | 0 | 0 | 0 | 0 |

|          |          |          |          |          |          |   |   |   |
|----------|----------|----------|----------|----------|----------|---|---|---|
| 0        | 6.57E-05 | 0        | 0.011506 | 0        | 0        | 0 | 0 | 0 |
| 0        | 0.000427 | 6.57E-05 | 0.051514 | 3.29E-05 | 0        | 0 | 0 | 0 |
| 0        | 9.86E-05 | 0        | 0.000559 | 0        | 0        | 0 | 0 | 0 |
| 0        | 0        | 0        | 0.001479 | 0        | 0        | 0 | 0 | 0 |
| 0        | 9.86E-05 | 0        | 0.003189 | 0        | 0        | 0 | 0 | 0 |
| 0        | 0.000526 | 0.000131 | 0.019757 | 0        | 0        | 0 | 0 | 0 |
| 0        | 3.29E-05 | 3.29E-05 | 0.007364 | 0        | 0        | 0 | 0 | 0 |
| 0        | 0        | 0        | 0.001348 | 0        | 0        | 0 | 0 | 0 |
| 0        | 6.57E-05 | 0        | 0.006575 | 0        | 0        | 0 | 0 | 0 |
| 0        | 0.000427 | 0        | 0.00766  | 0        | 0        | 0 | 0 | 0 |
| 0        | 0        | 0        | 0.006082 | 0        | 0        | 0 | 0 | 0 |
| 0        | 0        | 0        | 0.001644 | 0        | 0        | 0 | 0 | 0 |
| 0        | 0        | 0        | 0.014761 | 0        | 0        | 0 | 0 | 0 |
| 3.29E-05 | 0.00023  | 0        | 0.038792 | 0        | 0        | 0 | 0 | 0 |
| 3.29E-05 | 0.000329 | 0        | 0.013544 | 0        | 0        | 0 | 0 | 0 |
| 0        | 9.86E-05 | 0        | 0.001348 | 3.29E-05 | 0        | 0 | 0 | 0 |
| 6.57E-05 | 0        | 0        | 0.004208 | 0        | 0        | 0 | 0 | 0 |
| 0        | 0        | 0        | 0.000263 | 0        | 0        | 0 | 0 | 0 |
| 0        | 0        | 9.86E-05 | 0.000131 | 3.29E-05 | 0        | 0 | 0 | 0 |
| 0        | 0        | 0        | 0.000789 | 6.57E-05 | 0        | 0 | 0 | 0 |
| 0        | 0        | 0.000329 | 0.004241 | 0        | 0        | 0 | 0 | 0 |
| 0        | 0        | 0.000362 | 0.029981 | 0        | 0        | 0 | 0 | 0 |
| 0        | 0        | 0.000131 | 0.013281 | 0        | 0        | 0 | 0 | 0 |
| 0        | 0        | 9.86E-05 | 0.005128 | 0        | 0        | 0 | 0 | 0 |
| 0        | 0        | 3.29E-05 | 0.006213 | 0        | 0        | 0 | 0 | 0 |
| 0        | 0        | 0        | 0.002893 | 0        | 0        | 0 | 0 | 0 |
| 0        | 0        | 0        | 0.01144  | 0        | 0        | 0 | 0 | 0 |
| 3.29E-05 | 0.000756 | 3.29E-05 | 0.001742 | 0        | 0        | 0 | 0 | 0 |
| 0        | 6.57E-05 | 0        | 0.001644 | 3.29E-05 | 0        | 0 | 0 | 0 |
| 0        | 0.000131 | 3.29E-05 | 0.000526 | 0        | 0        | 0 | 0 | 0 |
| 0        | 9.86E-05 | 0        | 0        | 0        | 0        | 0 | 0 | 0 |
| 0        | 0        | 0        | 9.86E-05 | 0        | 0        | 0 | 0 | 0 |
| 0        | 0        | 0        | 3.29E-05 | 0        | 0        | 0 | 0 | 0 |
| 0        | 0        | 0        | 0        | 0        | 0        | 0 | 0 | 0 |
| 0        | 0        | 0        | 0        | 0        | 0        | 0 | 0 | 0 |
| 0        | 0        | 0        | 0.00069  | 0        | 0        | 0 | 0 | 0 |
| 0        | 0        | 0        | 0.010388 | 0.000164 | 0        | 0 | 0 | 0 |
| 0        | 0        | 0        | 0.009106 | 3.29E-05 | 0        | 0 | 0 | 0 |
| 0        | 0        | 0        | 0.019199 | 0        | 6.57E-05 | 0 | 0 | 0 |
| 0        | 0        | 0        | 0.000723 | 0        | 0        | 0 | 0 | 0 |
| 0        | 0        | 0        | 0.002893 | 0        | 0        | 0 | 0 | 0 |
| 0        | 0        | 0        | 3.29E-05 | 0        | 0        | 0 | 0 | 0 |
| 0        | 0        | 0        | 0.006049 | 0.000197 | 0        | 0 | 0 | 0 |
| 0        | 0        | 0.000131 | 0.004274 | 0        | 0        | 0 | 0 | 0 |
| 0        | 6.57E-05 | 0        | 0.000493 | 0        | 0        | 0 | 0 | 0 |
| 0        | 0        | 0        | 0.000493 | 0        | 0        | 0 | 0 | 0 |
| 0        | 0        | 0        | 0        | 6.57E-05 | 0        | 0 | 0 | 0 |

|          |          |          |          |          |   |   |   |          |
|----------|----------|----------|----------|----------|---|---|---|----------|
| 0        | 0        | 0        | 0.00046  | 0        | 0 | 0 | 0 | 0        |
| 0        | 0        | 0        | 0.008284 | 3.29E-05 | 0 | 0 | 0 | 0        |
| 0        | 0        | 0        | 3.29E-05 | 0        | 0 | 0 | 0 | 0        |
| 0        | 0        | 0        | 6.57E-05 | 0        | 0 | 0 | 0 | 0        |
| 0        | 0        | 0        | 0        | 0        | 0 | 0 | 0 | 0        |
| 0        | 0        | 0        | 9.86E-05 | 0        | 0 | 0 | 0 | 0        |
| 0        | 0        | 0        | 0        | 3.29E-05 | 0 | 0 | 0 | 0        |
| 0        | 0        | 0        | 0        | 0        | 0 | 0 | 0 | 0        |
| 0        | 0        | 0        | 0.000131 | 0        | 0 | 0 | 0 | 0        |
| 0        | 0        | 0        | 6.57E-05 | 0        | 0 | 0 | 0 | 0        |
| 0        | 0        | 0        | 6.57E-05 | 0        | 0 | 0 | 0 | 0        |
| 0        | 0        | 0        | 6.57E-05 | 0        | 0 | 0 | 0 | 0        |
| 0        | 0        | 0        | 0        | 0        | 0 | 0 | 0 | 0        |
| 0        | 0        | 0        | 6.57E-05 | 0        | 0 | 0 | 0 | 0        |
| 0        | 0        | 0        | 9.86E-05 | 3.29E-05 | 0 | 0 | 0 | 0        |
| 0        | 0        | 0        | 9.86E-05 | 0        | 0 | 0 | 0 | 0        |
| 0        | 0        | 0        | 0.00046  | 0        | 0 | 0 | 0 | 0        |
| 0.00023  | 0.004142 | 0.001611 | 0.060324 | 0        | 0 | 0 | 0 | 0        |
| 0.000164 | 0.001545 | 0.000526 | 0.107762 | 0        | 0 | 0 | 0 | 0        |
| 0        | 0.000296 | 0.000197 | 0.027187 | 0        | 0 | 0 | 0 | 0        |
| 3.29E-05 | 0.000493 | 0.001348 | 0.149084 | 0        | 0 | 0 | 0 | 0        |
| 0        | 0        | 0.000131 | 0.041191 | 0        | 0 | 0 | 0 | 0        |
| 0.000263 | 0.003452 | 0.001677 | 0.088695 | 0        | 0 | 0 | 0 | 0        |
| 9.86E-05 | 0.000986 | 0.009238 | 0.017621 | 0        | 0 | 0 | 0 | 6.57E-05 |
| 0        | 9.86E-05 | 9.86E-05 | 0.016075 | 3.29E-05 | 0 | 0 | 0 | 0        |
| 0        | 0        | 0.001479 | 0.075052 | 0        | 0 | 0 | 0 | 0        |
| 0        | 3.29E-05 | 0        | 0.003057 | 0        | 0 | 0 | 0 | 0        |
| 0        | 0        | 9.86E-05 | 0.000888 | 0        | 0 | 0 | 0 | 0        |
| 0        | 3.29E-05 | 3.29E-05 | 0.004865 | 0        | 0 | 0 | 0 | 0        |
| 0        | 6.57E-05 | 0        | 0.001709 | 0        | 0 | 0 | 0 | 0        |
| 0        | 0        | 6.57E-05 | 0.001414 | 0        | 0 | 0 | 0 | 0        |
| 0        | 0        | 0        | 0.001446 | 0        | 0 | 0 | 0 | 0        |
| 0        | 0        | 0.000493 | 0.000493 | 0        | 0 | 0 | 0 | 0        |
| 0        | 0        | 0        | 0.000296 | 0        | 0 | 0 | 0 | 0        |
| 0        | 0        | 3.29E-05 | 0.000657 | 0        | 0 | 0 | 0 | 0        |
| 0        | 0.00023  | 0.000493 | 0.014037 | 0        | 0 | 0 | 0 | 0        |
| 0        | 0.000131 | 0.000592 | 0.005556 | 0        | 0 | 0 | 0 | 0        |
| 0        | 0        | 0.001315 | 6.57E-05 | 0        | 0 | 0 | 0 | 0        |
| 0        | 0        | 0.000263 | 0.000131 | 0.00023  | 0 | 0 | 0 | 0        |
| 0        | 0        | 0.002104 | 0.000362 | 0        | 0 | 0 | 0 | 0        |
| 3.29E-05 | 0.000592 | 0.003485 | 0.003419 | 0        | 0 | 0 | 0 | 0        |
| 0        | 3.29E-05 | 0.00023  | 0.00023  | 0        | 0 | 0 | 0 | 0        |
| 3.29E-05 | 0.000789 | 0.002531 | 0.006345 | 0        | 0 | 0 | 0 | 0        |
| 0        | 0        | 0        | 0.003156 | 0        | 0 | 0 | 0 | 0        |
| 0        | 0        | 0        | 0.006213 | 0        | 0 | 0 | 0 | 0        |
| 0        | 3.29E-05 | 0        | 0.00904  | 0        | 0 | 0 | 0 | 0        |
| 0        | 0        | 0        | 0.002104 | 0        | 0 | 0 | 0 | 0        |



|          |          |          |          |          |   |   |   |   |
|----------|----------|----------|----------|----------|---|---|---|---|
| 0        | 0        | 0.000329 | 0.00572  | 0        | 0 | 0 | 0 | 0 |
| 0        | 3.29E-05 | 0.000493 | 0.006739 | 0        | 0 | 0 | 0 | 0 |
| 0        | 0        | 0        | 0.767382 | 0        | 0 | 0 | 0 | 0 |
| 0        | 6.57E-05 | 9.86E-05 | 0.018344 | 0        | 0 | 0 | 0 | 0 |
| 0        | 6.57E-05 | 0        | 0.623393 | 0        | 0 | 0 | 0 | 0 |
| 0        | 3.29E-05 | 0.000164 | 0.00046  | 0        | 0 | 0 | 0 | 0 |
| 0        | 9.86E-05 | 0.000197 | 0.00023  | 3.29E-05 | 0 | 0 | 0 | 0 |
| 0        | 0        | 0        | 3.29E-05 | 0        | 0 | 0 | 0 | 0 |
| 0        | 0        | 0        | 0.000164 | 0        | 0 | 0 | 0 | 0 |
| 0        | 0        | 0        | 0.000592 | 3.29E-05 | 0 | 0 | 0 | 0 |
| 0        | 0        | 0        | 6.57E-05 | 0        | 0 | 0 | 0 | 0 |
| 0        | 0        | 0.000263 | 0.006345 | 0        | 0 | 0 | 0 | 0 |
| 0        | 0.000625 | 0.000197 | 0.006016 | 0        | 0 | 0 | 0 | 0 |
| 3.29E-05 | 0.000756 | 3.29E-05 | 0.004405 | 0        | 0 | 0 | 0 | 0 |
| 3.29E-05 | 3.29E-05 | 0        | 0.004044 | 0        | 0 | 0 | 0 | 0 |
| 0        | 0.000131 | 0        | 0.009205 | 0        | 0 | 0 | 0 | 0 |
| 0        | 0.000131 | 3.29E-05 | 0.059305 | 0        | 0 | 0 | 0 | 0 |
| 0        | 0        | 0        | 0.001118 | 0.000131 | 0 | 0 | 0 | 0 |
| 0        | 9.86E-05 | 3.29E-05 | 0.001052 | 0        | 0 | 0 | 0 | 0 |
| 0        | 3.29E-05 | 0        | 0.003879 | 0        | 0 | 0 | 0 | 0 |
| 0        | 0.000592 | 0.000197 | 0.018048 | 0        | 0 | 0 | 0 | 0 |
| 0        | 0.000131 | 0.000131 | 0.000164 | 0        | 0 | 0 | 0 | 0 |
| 0        | 6.57E-05 | 3.29E-05 | 0        | 0        | 0 | 0 | 0 | 0 |
| 0        | 0        | 0.00046  | 6.57E-05 | 3.29E-05 | 0 | 0 | 0 | 0 |
| 0        | 0.000296 | 0.000394 | 0.056346 | 0        | 0 | 0 | 0 | 0 |
| 0        | 6.57E-05 | 3.29E-05 | 0.046846 | 0        | 0 | 0 | 0 | 0 |
| 0        | 0.000164 | 0        | 0.097834 | 0        | 0 | 0 | 0 | 0 |
| 0        | 6.57E-05 | 0        | 0.092311 | 0        | 0 | 0 | 0 | 0 |
| 0        | 0        | 3.29E-05 | 0.007232 | 0        | 0 | 0 | 0 | 0 |
| 0        | 0        | 0        | 0.038496 | 0        | 0 | 0 | 0 | 0 |
| 0        | 6.57E-05 | 0        | 0.000197 | 0        | 0 | 0 | 0 | 0 |
| 6.57E-05 | 0.001611 | 0        | 0.000394 | 0        | 0 | 0 | 0 | 0 |
| 0        | 6.57E-05 | 0.000131 | 0.00023  | 0        | 0 | 0 | 0 | 0 |
| 0        | 0.000164 | 0.001315 | 0.001446 | 0        | 0 | 0 | 0 | 0 |
| 0        | 0        | 0.001907 | 0.050002 | 0        | 0 | 0 | 0 | 0 |
| 0        | 0        | 0        | 0        | 0        | 0 | 0 | 0 | 0 |
| 0        | 0        | 0        | 0.000526 | 0        | 0 | 0 | 0 | 0 |
| 0        | 3.29E-05 | 0        | 3.29E-05 | 0        | 0 | 0 | 0 | 0 |
| 0        | 0        | 0        | 6.57E-05 | 3.29E-05 | 0 | 0 | 0 | 0 |
| 0        | 3.29E-05 | 0        | 3.29E-05 | 0        | 0 | 0 | 0 | 0 |
| 0        | 0.000164 | 0        | 0.01052  | 3.29E-05 | 0 | 0 | 0 | 0 |
| 0        | 0        | 0        | 6.57E-05 | 0        | 0 | 0 | 0 | 0 |
| 0        | 0        | 0        | 0        | 0        | 0 | 0 | 0 | 0 |
| 0        | 0        | 0        | 0        | 0        | 0 | 0 | 0 | 0 |
| 0        | 0        | 0        | 0        | 0        | 0 | 0 | 0 | 0 |
| 3.29E-05 | 0.000263 | 0        | 0.01338  | 3.29E-05 | 0 | 0 | 0 | 0 |
| 6.57E-05 | 0.001315 | 0        | 0.013873 | 3.29E-05 | 0 | 0 | 0 | 0 |

|          |          |          |          |          |          |   |   |          |
|----------|----------|----------|----------|----------|----------|---|---|----------|
| 0        | 0        | 0        | 0.00046  | 0        | 0        | 0 | 0 | 0        |
| 0        | 0        | 3.29E-05 | 0.000164 | 0        | 0        | 0 | 0 | 0        |
| 0        | 0        | 3.29E-05 | 0.000592 | 0        | 0        | 0 | 0 | 0        |
| 0        | 0        | 0        | 9.86E-05 | 0        | 0        | 0 | 0 | 0        |
| 0        | 0        | 0        | 0        | 0        | 0        | 0 | 0 | 0        |
| 0        | 0        | 3.29E-05 | 0.000822 | 0        | 0        | 0 | 0 | 0        |
| 0        | 0        | 0        | 0.000329 | 0        | 0        | 0 | 0 | 0        |
| 0        | 0        | 0        | 6.57E-05 | 3.29E-05 | 0        | 0 | 0 | 0        |
| 0        | 0        | 0        | 6.57E-05 | 6.57E-05 | 0        | 0 | 0 | 0        |
| 0        | 0        | 0        | 0.016864 | 0        | 0        | 0 | 0 | 0        |
| 0        | 0        | 0        | 0.000197 | 0        | 0        | 0 | 0 | 0        |
| 0        | 0        | 3.29E-05 | 0.000362 | 0        | 0        | 0 | 0 | 0        |
| 0        | 0        | 0        | 0.001611 | 3.29E-05 | 0        | 0 | 0 | 0        |
| 0        | 0        | 0        | 0.003024 | 0        | 0        | 0 | 0 | 0        |
| 0        | 0        | 0        | 0.000953 | 0        | 0        | 0 | 0 | 0        |
| 0        | 0        | 0        | 0.000329 | 0        | 0        | 0 | 0 | 0        |
| 0        | 0        | 0        | 6.57E-05 | 0        | 0        | 0 | 0 | 0        |
| 0        | 0        | 0        | 0        | 0        | 0        | 0 | 0 | 0        |
| 0        | 0        | 0        | 6.57E-05 | 0        | 0        | 0 | 0 | 0        |
| 0        | 0        | 0        | 0        | 6.57E-05 | 0        | 0 | 0 | 0        |
| 0        | 0        | 0        | 3.29E-05 | 0        | 0        | 0 | 0 | 0        |
| 0        | 0        | 0        | 0.000296 | 3.29E-05 | 0        | 0 | 0 | 0        |
| 0        | 0        | 0        | 0        | 0        | 3.29E-05 | 0 | 0 | 0        |
| 0        | 0        | 0        | 9.86E-05 | 3.29E-05 | 0        | 0 | 0 | 0        |
| 0        | 6.57E-05 | 3.29E-05 | 0.004537 | 0        | 0        | 0 | 0 | 0        |
| 0        | 0.000131 | 0.000526 | 0.004701 | 0        | 0        | 0 | 0 | 0        |
| 0        | 0        | 0        | 3.29E-05 | 3.29E-05 | 0        | 0 | 0 | 0        |
| 3.29E-05 | 0.000263 | 0.000164 | 0.027713 | 0        | 0        | 0 | 0 | 0        |
| 3.29E-05 | 0.000164 | 0        | 0.007791 | 0        | 0        | 0 | 0 | 0        |
| 3.29E-05 | 0.000526 | 0.000164 | 0.024689 | 0        | 0        | 0 | 0 | 0        |
| 0        | 3.29E-05 | 6.57E-05 | 0.006345 | 0        | 0        | 0 | 0 | 0        |
| 0        | 9.86E-05 | 0.000263 | 0.035964 | 0        | 0        | 0 | 0 | 0        |
| 0        | 0        | 0        | 0.004011 | 0        | 0        | 0 | 0 | 0        |
| 9.86E-05 | 0.000625 | 0        | 0.00572  | 0        | 0        | 0 | 0 | 0.000131 |
| 0        | 9.86E-05 | 0.000263 | 0.007988 | 0        | 0        | 0 | 0 | 0        |
| 0        | 3.29E-05 | 0        | 0.001578 | 0        | 0        | 0 | 0 | 0        |
| 0        | 0        | 0.000394 | 0.000493 | 0        | 0        | 0 | 0 | 0        |
| 0        | 3.29E-05 | 0        | 0.009599 | 0        | 0        | 0 | 0 | 0        |
| 0        | 0.00023  | 0        | 0.00355  | 0        | 0        | 0 | 0 | 0        |
| 3.29E-05 | 0.000953 | 0.000559 | 0.000986 | 0        | 0        | 0 | 0 | 0        |
| 0        | 0.000394 | 0.000197 | 0.00046  | 0        | 0        | 0 | 0 | 0        |
| 0        | 0.000493 | 0.00069  | 0.002992 | 6.57E-05 | 0        | 0 | 0 | 0        |
| 0        | 0        | 0.00023  | 0.016864 | 0.000131 | 0        | 0 | 0 | 0        |
| 0        | 6.57E-05 | 9.86E-05 | 0.000394 | 0        | 0        | 0 | 0 | 0        |
| 0        | 3.29E-05 | 0        | 6.57E-05 | 0        | 0        | 0 | 0 | 0        |
| 0        | 0        | 0.000131 | 0.006476 | 0        | 0        | 0 | 0 | 0        |
| 0        | 0        | 0        | 0.001052 | 0        | 0        | 0 | 0 | 0        |

|          |          |          |          |          |   |   |   |   |
|----------|----------|----------|----------|----------|---|---|---|---|
| 0        | 0        | 0.000131 | 0.01144  | 0        | 0 | 0 | 0 | 0 |
| 0        | 9.86E-05 | 0.000953 | 0.003123 | 3.29E-05 | 0 | 0 | 0 | 0 |
| 0        | 6.57E-05 | 0.000131 | 0.012065 | 0        | 0 | 0 | 0 | 0 |
| 0        | 0        | 0        | 0.008909 | 0        | 0 | 0 | 0 | 0 |
| 0        | 0.000131 | 0.001052 | 0.001742 | 0        | 0 | 0 | 0 | 0 |
| 0        | 0.000164 | 0.000625 | 0.000625 | 0        | 0 | 0 | 0 | 0 |
| 0        | 9.86E-05 | 3.29E-05 | 0.004734 | 0        | 0 | 0 | 0 | 0 |
| 0        | 3.29E-05 | 0        | 0.004011 | 0        | 0 | 0 | 0 | 0 |
| 0        | 0        | 0        | 0.000855 | 0        | 0 | 0 | 0 | 0 |
| 0        | 6.57E-05 | 6.57E-05 | 0.000493 | 0        | 0 | 0 | 0 | 0 |
| 0        | 3.29E-05 | 0        | 0.003024 | 0        | 0 | 0 | 0 | 0 |
| 0        | 0        | 0        | 0        | 0        | 0 | 0 | 0 | 0 |
| 0        | 0        | 0.000164 | 0        | 0        | 0 | 0 | 0 | 0 |
| 0        | 0        | 0        | 0.001742 | 0        | 0 | 0 | 0 | 0 |
| 0        | 3.29E-05 | 3.29E-05 | 0.003189 | 0        | 0 | 0 | 0 | 0 |
| 0        | 0        | 0        | 0.002729 | 0        | 0 | 0 | 0 | 0 |
| 0        | 0        | 0        | 0.000526 | 0        | 0 | 0 | 0 | 0 |
| 3.29E-05 | 0        | 0.000131 | 0.002498 | 3.29E-05 | 0 | 0 | 0 | 0 |
| 0        | 0        | 0        | 0.011572 | 0        | 0 | 0 | 0 | 0 |
| 0        | 0        | 0        | 0.00812  | 0        | 0 | 0 | 0 | 0 |
| 0        | 0        | 0        | 0.003452 | 0        | 0 | 0 | 0 | 0 |
| 0        | 0        | 9.86E-05 | 0.005227 | 0        | 0 | 0 | 0 | 0 |
| 0        | 0        | 0        | 0.003682 | 0        | 0 | 0 | 0 | 0 |
| 0        | 3.29E-05 | 3.29E-05 | 0.000888 | 0        | 0 | 0 | 0 | 0 |
| 0        | 0.000197 | 0        | 0.006673 | 0        | 0 | 0 | 0 | 0 |
| 0        | 0        | 0        | 0        | 0        | 0 | 0 | 0 | 0 |
| 0        | 0        | 0        | 0.000329 | 0        | 0 | 0 | 0 | 0 |
| 0        | 0        | 0        | 0        | 0        | 0 | 0 | 0 | 0 |
| 0        | 0        | 0        | 3.29E-05 | 0        | 0 | 0 | 0 | 0 |
| 0        | 0        | 0        | 0        | 0        | 0 | 0 | 0 | 0 |
| 0        | 0        | 3.29E-05 | 6.57E-05 | 0        | 0 | 0 | 0 | 0 |
| 0        | 0        | 0        | 0        | 0        | 0 | 0 | 0 | 0 |
| 0        | 0        | 0        | 3.29E-05 | 0        | 0 | 0 | 0 | 0 |
| 0        | 0        | 0        | 3.29E-05 | 6.57E-05 | 0 | 0 | 0 | 0 |
| 0        | 0        | 0        | 6.57E-05 | 0        | 0 | 0 | 0 | 0 |
| 0        | 3.29E-05 | 0.000263 | 0.001446 | 0        | 0 | 0 | 0 | 0 |
| 0        | 0        | 0        | 0.000822 | 0        | 0 | 0 | 0 | 0 |
| 0        | 3.29E-05 | 6.57E-05 | 0.006312 | 6.57E-05 | 0 | 0 | 0 | 0 |
| 0        | 0        | 0.000164 | 0.027351 | 0        | 0 | 0 | 0 | 0 |
| 0        | 0.000329 | 0.00023  | 0.006049 | 3.29E-05 | 0 | 0 | 0 | 0 |
| 0        | 0.000164 | 0.000723 | 0.003156 | 0        | 0 | 0 | 0 | 0 |
| 0        | 0.000362 | 0.00069  | 0.002531 | 0        | 0 | 0 | 0 | 0 |
| 0        | 0        | 0        | 0.002433 | 0        | 0 | 0 | 0 | 0 |
| 0        | 6.57E-05 | 0        | 0.013807 | 0        | 0 | 0 | 0 | 0 |
| 0        | 0.00023  | 0        | 0.031099 | 0        | 0 | 0 | 0 | 0 |
| 0        | 0        | 0        | 0.004997 | 0        | 0 | 0 | 0 | 0 |
| 0        | 0        | 3.29E-05 | 0.000296 | 0        | 0 | 0 | 0 | 0 |

|   |          |          |          |          |   |   |   |   |
|---|----------|----------|----------|----------|---|---|---|---|
| 0 | 0        | 0        | 0.007265 | 0.000164 | 0 | 0 | 0 | 0 |
| 0 | 0.00046  | 0        | 0.030211 | 0        | 0 | 0 | 0 | 0 |
| 0 | 0.000164 | 3.29E-05 | 0.000263 | 0        | 0 | 0 | 0 | 0 |
| 0 | 0        | 3.29E-05 | 0        | 0        | 0 | 0 | 0 | 0 |
| 0 | 0        | 0        | 0        | 0        | 0 | 0 | 0 | 0 |
| 0 | 3.29E-05 | 0.000131 | 0.019199 | 0        | 0 | 0 | 0 | 0 |
| 0 | 6.57E-05 | 0        | 0.000953 | 0        | 0 | 0 | 0 | 0 |
| 0 | 0.000723 | 0.002301 | 0.00286  | 0        | 0 | 0 | 0 | 0 |
| 0 | 0        | 0        | 0.000329 | 3.29E-05 | 0 | 0 | 0 | 0 |
| 0 | 3.29E-05 | 3.29E-05 | 3.29E-05 | 6.57E-05 | 0 | 0 | 0 | 0 |
| 0 | 0.001216 | 3.29E-05 | 0.058648 | 0        | 0 | 0 | 0 | 0 |
| 0 | 0        | 0        | 0.013873 | 0        | 0 | 0 | 0 | 0 |
| 0 | 0        | 0        | 0.001578 | 0        | 0 | 0 | 0 | 0 |
| 0 | 0        | 0        | 0.007561 | 0        | 0 | 0 | 0 | 0 |
| 0 | 0        | 0        | 0.00046  | 0        | 0 | 0 | 0 | 0 |
| 0 | 6.57E-05 | 0        | 0.000427 | 0        | 0 | 0 | 0 | 0 |
| 0 | 0        | 0        | 9.86E-05 | 0        | 0 | 0 | 0 | 0 |
| 0 | 3.29E-05 | 0        | 0.01739  | 0        | 0 | 0 | 0 | 0 |
| 0 | 3.29E-05 | 0        | 0.018048 | 0        | 0 | 0 | 0 | 0 |
| 0 | 0        | 0.000131 | 0.005786 | 0        | 0 | 0 | 0 | 0 |
| 0 | 3.29E-05 | 0        | 0.002597 | 0        | 0 | 0 | 0 | 0 |
| 0 | 0        | 0        | 0.029718 | 0        | 0 | 0 | 0 | 0 |
| 0 | 0        | 0        | 0.007298 | 0        | 0 | 0 | 0 | 0 |































| k_Bacteri |
|-----------|-----------|-----------|-----------|-----------|-----------|-----------|-----------|-----------|
| 0         | 0         | 0         | 0         | 0.000164  | 0         | 0         | 0         | 0         |
| 0         | 0         | 0         | 0         | 0.00046   | 0         | 0         | 0         | 0         |
| 0         | 0         | 0         | 0         | 0.000164  | 0         | 0         | 0         | 0         |
| 0         | 0         | 0         | 0         | 0.000164  | 0         | 0         | 0         | 0         |
| 0         | 0         | 0         | 0         | 6.57E-05  | 0         | 0         | 0         | 0         |
| 0         | 0         | 0         | 0         | 9.86E-05  | 0         | 0         | 0         | 0         |
| 0         | 0         | 0         | 0         | 0.00023   | 0         | 0         | 0         | 0         |
| 0         | 0         | 0         | 0         | 9.86E-05  | 0         | 0         | 0         | 0         |
| 0         | 0         | 0         | 0         | 9.86E-05  | 0         | 0         | 0         | 0         |
| 0         | 0         | 0         | 0         | 0.000164  | 0         | 0         | 0         | 0         |
| 0         | 0         | 0         | 0         | 0         | 0         | 0         | 0         | 0         |
| 0         | 0         | 0         | 0         | 0.000197  | 0         | 0         | 0         | 0         |
| 0         | 0         | 0         | 0         | 0.0024    | 0         | 0         | 0         | 0         |
| 0         | 0         | 0         | 0         | 0.000756  | 0         | 0         | 0.008843  | 0         |
| 0         | 0         | 0         | 0         | 0.000131  | 0         | 0         | 0         | 0         |
| 0         | 0         | 0         | 0         | 0.000197  | 0         | 0         | 0         | 0         |
| 0         | 0         | 0         | 0         | 6.57E-05  | 0         | 0         | 0         | 0         |
| 0         | 0         | 0         | 0         | 0         | 0         | 0         | 0         | 0         |
| 0         | 0         | 0         | 0         | 3.29E-05  | 0.000329  | 0         | 0         | 0         |
| 0         | 0         | 0         | 0         | 6.57E-05  | 0         | 0         | 0         | 0         |
| 0         | 0         | 0         | 0         | 0.001315  | 0         | 0         | 0         | 0         |
| 0         | 0         | 0         | 0         | 0.000822  | 0         | 0         | 0         | 0         |
| 0         | 0         | 0         | 0         | 0.005589  | 0         | 0         | 0         | 0         |
| 0         | 0         | 0         | 0         | 0.010553  | 0         | 0         | 0         | 0         |
| 0         | 0         | 0         | 0         | 0.002827  | 0         | 0         | 0         | 0         |
| 0         | 0         | 0         | 0         | 0.001874  | 0         | 0         | 0         | 0         |
| 0         | 0         | 0         | 0         | 0.002926  | 0         | 0         | 0         | 0         |
| 0         | 0         | 0         | 0         | 0.001414  | 0         | 0         | 0         | 0         |
| 0         | 0         | 0         | 0         | 0.002531  | 0         | 0         | 0         | 0         |
| 0         | 0         | 0         | 0         | 0.001775  | 0         | 0         | 0         | 0         |
| 0         | 0         | 0         | 0         | 0.001709  | 0         | 0         | 0         | 0         |
| 0         | 0         | 0         | 0         | 0.000723  | 0         | 0.000296  | 0         | 0         |
| 0         | 0         | 0         | 0         | 0.00263   | 0         | 0         | 0         | 0         |
| 0         | 0         | 0         | 0         | 0.002531  | 0         | 0         | 0         | 0         |
| 0         | 0         | 0         | 0         | 0.001611  | 0         | 0         | 0         | 0         |
| 0         | 0         | 0         | 0         | 0.001216  | 0         | 0         | 0         | 0         |
| 0         | 0         | 0         | 0         | 0.001381  | 0         | 0         | 0         | 0         |
| 0         | 0         | 0         | 0         | 0.000789  | 0         | 0         | 0         | 0         |
| 0         | 0         | 0         | 0         | 0.00092   | 0         | 0         | 0         | 0         |
| 0         | 0         | 0         | 0         | 0.002203  | 0         | 0         | 0         | 0         |
| 0         | 0         | 0         | 0         | 0.001709  | 0         | 0         | 0         | 0         |
| 0         | 0         | 0         | 0         | 0.001085  | 0         | 0         | 0         | 0         |
| 0         | 0         | 0         | 0         | 0.001611  | 0         | 0         | 0         | 0         |
| 0         | 0         | 0         | 0         | 0.002104  | 0         | 0         | 0         | 0         |

|   |   |   |   |          |          |          |   |   |
|---|---|---|---|----------|----------|----------|---|---|
| 0 | 0 | 0 | 0 | 0.003222 | 0        | 0        | 0 | 0 |
| 0 | 0 | 0 | 0 | 0.000953 | 0        | 0        | 0 | 0 |
| 0 | 0 | 0 | 0 | 0.001019 | 0        | 0        | 0 | 0 |
| 0 | 0 | 0 | 0 | 0.003945 | 0        | 0        | 0 | 0 |
| 0 | 0 | 0 | 0 | 0.002893 | 0        | 0        | 0 | 0 |
| 0 | 0 | 0 | 0 | 6.57E-05 | 0        | 0        | 0 | 0 |
| 0 | 0 | 0 | 0 | 3.29E-05 | 0        | 0        | 0 | 0 |
| 0 | 0 | 0 | 0 | 0.000592 | 0        | 0        | 0 | 0 |
| 0 | 0 | 0 | 0 | 0.010191 | 0        | 0        | 0 | 0 |
| 0 | 0 | 0 | 0 | 0.003616 | 0        | 0        | 0 | 0 |
| 0 | 0 | 0 | 0 | 0.001611 | 0        | 0        | 0 | 0 |
| 0 | 0 | 0 | 0 | 0.001644 | 0        | 0        | 0 | 0 |
| 0 | 0 | 0 | 0 | 0.000657 | 0        | 0        | 0 | 0 |
| 0 | 0 | 0 | 0 | 0.001019 | 0        | 0        | 0 | 0 |
| 0 | 0 | 0 | 0 | 0.000164 | 0        | 0        | 0 | 0 |
| 0 | 0 | 0 | 0 | 0.001808 | 0        | 0        | 0 | 0 |
| 0 | 0 | 0 | 0 | 0.000789 | 0        | 0        | 0 | 0 |
| 0 | 0 | 0 | 0 | 0        | 0        | 0        | 0 | 0 |
| 0 | 0 | 0 | 0 | 0.005194 | 0        | 0        | 0 | 0 |
| 0 | 0 | 0 | 0 | 0.000888 | 0        | 0        | 0 | 0 |
| 0 | 0 | 0 | 0 | 0        | 0        | 0        | 0 | 0 |
| 0 | 0 | 0 | 0 | 3.29E-05 | 0        | 0        | 0 | 0 |
| 0 | 0 | 0 | 0 | 6.57E-05 | 0        | 0        | 0 | 0 |
| 0 | 0 | 0 | 0 | 9.86E-05 | 0        | 0        | 0 | 0 |
| 0 | 0 | 0 | 0 | 0.002104 | 0        | 0        | 0 | 0 |
| 0 | 0 | 0 | 0 | 0.00023  | 0        | 0        | 0 | 0 |
| 0 | 0 | 0 | 0 | 0.002663 | 0        | 0        | 0 | 0 |
| 0 | 0 | 0 | 0 | 0        | 0        | 0        | 0 | 0 |
| 0 | 0 | 0 | 0 | 0.000789 | 0        | 0        | 0 | 0 |
| 0 | 0 | 0 | 0 | 0.000197 | 0        | 0        | 0 | 0 |
| 0 | 0 | 0 | 0 | 0.00069  | 0        | 0        | 0 | 0 |
| 0 | 0 | 0 | 0 | 0.001085 | 3.29E-05 | 0.000592 | 0 | 0 |
| 0 | 0 | 0 | 0 | 0.001282 | 0        | 0        | 0 | 0 |
| 0 | 0 | 0 | 0 | 0.001085 | 0        | 0        | 0 | 0 |
| 0 | 0 | 0 | 0 | 0.001085 | 0        | 0        | 0 | 0 |
| 0 | 0 | 0 | 0 | 0.013643 | 0        | 0        | 0 | 0 |
| 0 | 0 | 0 | 0 | 0.000888 | 0        | 0        | 0 | 0 |
| 0 | 0 | 0 | 0 | 0        | 0        | 0        | 0 | 0 |
| 0 | 0 | 0 | 0 | 0.002729 | 0        | 0        | 0 | 0 |
| 0 | 0 | 0 | 0 | 0.000131 | 0        | 0        | 0 | 0 |
| 0 | 0 | 0 | 0 | 0.000986 | 0        | 0        | 0 | 0 |
| 0 | 0 | 0 | 0 | 0.001644 | 0        | 0        | 0 | 0 |
| 0 | 0 | 0 | 0 | 0.0024   | 0        | 0        | 0 | 0 |
| 0 | 0 | 0 | 0 | 0.000296 | 6.57E-05 | 0.000164 | 0 | 0 |
| 0 | 0 | 0 | 0 | 6.57E-05 | 0        | 0        | 0 | 0 |
| 0 | 0 | 0 | 0 | 0.002104 | 0        | 0        | 0 | 0 |
| 0 | 0 | 0 | 0 | 0.000362 | 0        | 0        | 0 | 0 |

|   |   |   |   |          |          |          |   |          |
|---|---|---|---|----------|----------|----------|---|----------|
| 0 | 0 | 0 | 0 | 0.000131 | 0        | 0        | 0 | 0        |
| 0 | 0 | 0 | 0 | 0.000625 | 0        | 0        | 0 | 0        |
| 0 | 0 | 0 | 0 | 0.000329 | 0        | 0        | 0 | 0        |
| 0 | 0 | 0 | 0 | 0.000756 | 0        | 3.29E-05 | 0 | 0        |
| 0 | 0 | 0 | 0 | 0.001019 | 0        | 0        | 0 | 0        |
| 0 | 0 | 0 | 0 | 0.000855 | 0        | 0        | 0 | 0        |
| 0 | 0 | 0 | 0 | 9.86E-05 | 0        | 0        | 0 | 0        |
| 0 | 0 | 0 | 0 | 0.000362 | 0        | 0        | 0 | 0        |
| 0 | 0 | 0 | 0 | 0.000329 | 0        | 0        | 0 | 0        |
| 0 | 0 | 0 | 0 | 0.002137 | 0        | 0        | 0 | 0        |
| 0 | 0 | 0 | 0 | 0.001348 | 3.29E-05 | 0        | 0 | 0        |
| 0 | 0 | 0 | 0 | 0.000526 | 0        | 0        | 0 | 0        |
| 0 | 0 | 0 | 0 | 0        | 0        | 0        | 0 | 0        |
| 0 | 0 | 0 | 0 | 0.001808 | 0        | 0        | 0 | 9.86E-05 |
| 0 | 0 | 0 | 0 | 0.000164 | 0        | 0        | 0 | 0        |
| 0 | 0 | 0 | 0 | 3.29E-05 | 0        | 0        | 0 | 0        |
| 0 | 0 | 0 | 0 | 0.000164 | 0        | 0        | 0 | 0        |
| 0 | 0 | 0 | 0 | 0.000592 | 0        | 0        | 0 | 0        |
| 0 | 0 | 0 | 0 | 0        | 0        | 0        | 0 | 0        |
| 0 | 0 | 0 | 0 | 6.57E-05 | 0        | 0        | 0 | 0        |
| 0 | 0 | 0 | 0 | 0.000756 | 0        | 0        | 0 | 0        |
| 0 | 0 | 0 | 0 | 0.001118 | 0        | 0        | 0 | 0        |
| 0 | 0 | 0 | 0 | 0.000362 | 0        | 0        | 0 | 0        |
| 0 | 0 | 0 | 0 | 0.001151 | 0        | 0        | 0 | 0        |
| 0 | 0 | 0 | 0 | 0.000362 | 0        | 0        | 0 | 0        |
| 0 | 0 | 0 | 0 | 0.001414 | 0        | 0        | 0 | 0        |
| 0 | 0 | 0 | 0 | 0.000197 | 0        | 0        | 0 | 0        |
| 0 | 0 | 0 | 0 | 0.002433 | 0        | 0        | 0 | 0        |
| 0 | 0 | 0 | 0 | 0        | 0        | 0        | 0 | 0        |
| 0 | 0 | 0 | 0 | 0        | 0        | 0        | 0 | 0        |
| 0 | 0 | 0 | 0 | 6.57E-05 | 0        | 0        | 0 | 0        |
| 0 | 0 | 0 | 0 | 0.000756 | 0        | 0        | 0 | 0        |
| 0 | 0 | 0 | 0 | 6.57E-05 | 0        | 0        | 0 | 0        |
| 0 | 0 | 0 | 0 | 0.000822 | 0        | 0        | 0 | 0        |
| 0 | 0 | 0 | 0 | 0.00069  | 0        | 0        | 0 | 0        |
| 0 | 0 | 0 | 0 | 0.001151 | 0        | 0        | 0 | 0        |
| 0 | 0 | 0 | 0 | 0.000789 | 0        | 0        | 0 | 0        |
| 0 | 0 | 0 | 0 | 0.000526 | 0        | 0        | 0 | 0        |
| 0 | 0 | 0 | 0 | 0.001019 | 0        | 0        | 0 | 0        |
| 0 | 0 | 0 | 0 | 0.000756 | 0        | 0        | 0 | 0        |
| 0 | 0 | 0 | 0 | 0.001907 | 0        | 0        | 0 | 0        |
| 0 | 0 | 0 | 0 | 0.001512 | 0        | 0        | 0 | 0        |
| 0 | 0 | 0 | 0 | 6.57E-05 | 0        | 0        | 0 | 0        |
| 0 | 0 | 0 | 0 | 0.003452 | 0        | 0        | 0 | 0        |
| 0 | 0 | 0 | 0 | 0.001118 | 0        | 0        | 0 | 0        |
| 0 | 0 | 0 | 0 | 0.001907 | 0        | 0        | 0 | 0        |
| 0 | 0 | 0 | 0 | 0.000756 | 0        | 0        | 0 | 0        |



|   |          |   |          |          |          |   |   |          |
|---|----------|---|----------|----------|----------|---|---|----------|
| 0 | 0        | 0 | 0        | 3.29E-05 | 0        | 0 | 0 | 0        |
| 0 | 0        | 0 | 0        | 0        | 0        | 0 | 0 | 0        |
| 0 | 0        | 0 | 3.29E-05 | 6.57E-05 | 0        | 0 | 0 | 0        |
| 0 | 0        | 0 | 0        | 0        | 0        | 0 | 0 | 3.29E-05 |
| 0 | 0        | 0 | 0        | 0        | 0        | 0 | 0 | 0        |
| 0 | 0        | 0 | 0        | 0.001808 | 0        | 0 | 0 | 0        |
| 0 | 0        | 0 | 0        | 0.000723 | 0        | 0 | 0 | 0        |
| 0 | 0        | 0 | 0        | 0.001249 | 0        | 0 | 0 | 0        |
| 0 | 0        | 0 | 0        | 0.000657 | 0        | 0 | 0 | 0        |
| 0 | 0        | 0 | 0        | 0.000592 | 0        | 0 | 0 | 0        |
| 0 | 0        | 0 | 0        | 9.86E-05 | 0        | 0 | 0 | 0        |
| 0 | 0        | 0 | 0        | 0.000888 | 0        | 0 | 0 | 0        |
| 0 | 0        | 0 | 0        | 0.001512 | 0        | 0 | 0 | 0        |
| 0 | 0        | 0 | 0        | 0.000197 | 0        | 0 | 0 | 0        |
| 0 | 0        | 0 | 0        | 0.001118 | 0        | 0 | 0 | 0        |
| 0 | 0        | 0 | 0        | 0.00023  | 0        | 0 | 0 | 0        |
| 0 | 0        | 0 | 0        | 0.000493 | 0        | 0 | 0 | 0        |
| 0 | 0        | 0 | 0        | 3.29E-05 | 0        | 0 | 0 | 0        |
| 0 | 0        | 0 | 0        | 0.000394 | 0        | 0 | 0 | 0        |
| 0 | 0        | 0 | 0        | 0.000296 | 0        | 0 | 0 | 0        |
| 0 | 0        | 0 | 0        | 0.001709 | 0        | 0 | 0 | 0        |
| 0 | 0        | 0 | 0        | 0.002794 | 0        | 0 | 0 | 0        |
| 0 | 0        | 0 | 0        | 0.000197 | 0        | 0 | 0 | 0        |
| 0 | 0        | 0 | 0        | 6.57E-05 | 0        | 0 | 0 | 0        |
| 0 | 0        | 0 | 0        | 0.000592 | 0        | 0 | 0 | 0        |
| 0 | 0        | 0 | 0        | 0.00092  | 0        | 0 | 0 | 0        |
| 0 | 0        | 0 | 0        | 0.001874 | 0        | 0 | 0 | 0        |
| 0 | 0        | 0 | 0        | 0.000657 | 0        | 0 | 0 | 0        |
| 0 | 0        | 0 | 0        | 0.002531 | 0        | 0 | 0 | 0        |
| 0 | 0        | 0 | 0        | 0.000427 | 0        | 0 | 0 | 0        |
| 0 | 0        | 0 | 0        | 0.001479 | 0        | 0 | 0 | 0        |
| 0 | 0        | 0 | 0        | 0        | 0        | 0 | 0 | 0        |
| 0 | 0        | 0 | 0        | 3.29E-05 | 0        | 0 | 0 | 0        |
| 0 | 0        | 0 | 0        | 0.00023  | 0        | 0 | 0 | 0        |
| 0 | 0        | 0 | 0        | 0.00194  | 0        | 0 | 0 | 0        |
| 0 | 0        | 0 | 0        | 0.000493 | 0        | 0 | 0 | 0        |
| 0 | 0        | 0 | 0        | 0.006016 | 0        | 0 | 0 | 0        |
| 0 | 0        | 0 | 0        | 0.002597 | 0        | 0 | 0 | 0        |
| 0 | 0        | 0 | 0        | 0.000164 | 0        | 0 | 0 | 0        |
| 0 | 0        | 0 | 0        | 0.000986 | 0        | 0 | 0 | 0        |
| 0 | 0        | 0 | 0        | 0.001972 | 0        | 0 | 0 | 0        |
| 0 | 0        | 0 | 0        | 0.004208 | 0        | 0 | 0 | 0        |
| 0 | 0        | 0 | 0        | 0.003287 | 0        | 0 | 0 | 0        |
| 0 | 0        | 0 | 0        | 0.003485 | 0        | 0 | 0 | 0        |
| 0 | 0        | 0 | 0        | 0.001348 | 0        | 0 | 0 | 0        |
| 0 | 0        | 0 | 0        | 0.003419 | 0        | 0 | 0 | 0        |
| 0 | 3.29E-05 | 0 | 0        | 0.002203 | 3.29E-05 | 0 | 0 | 0        |

|   |   |          |   |          |          |   |   |          |
|---|---|----------|---|----------|----------|---|---|----------|
| 0 | 0 | 0        | 0 | 0.000493 | 0        | 0 | 0 | 0        |
| 0 | 0 | 0        | 0 | 0.002203 | 0        | 0 | 0 | 0        |
| 0 | 0 | 0        | 0 | 0.00092  | 0        | 0 | 0 | 0        |
| 0 | 0 | 0        | 0 | 0        | 0        | 0 | 0 | 0        |
| 0 | 0 | 0        | 0 | 0.00194  | 0        | 0 | 0 | 0        |
| 0 | 0 | 0        | 0 | 0.000625 | 0        | 0 | 0 | 0        |
| 0 | 0 | 0        | 0 | 0.001019 | 0        | 0 | 0 | 0        |
| 0 | 0 | 0        | 0 | 0.002268 | 0        | 0 | 0 | 0        |
| 0 | 0 | 0        | 0 | 0.003846 | 0        | 0 | 0 | 3.29E-05 |
| 0 | 0 | 0        | 0 | 0.001479 | 0        | 0 | 0 | 0        |
| 0 | 0 | 0        | 0 | 0.000164 | 0        | 0 | 0 | 0        |
| 0 | 0 | 0        | 0 | 0.002203 | 0.001446 | 0 | 0 | 0        |
| 0 | 0 | 0        | 0 | 0.00023  | 0        | 0 | 0 | 0        |
| 0 | 0 | 0        | 0 | 9.86E-05 | 0        | 0 | 0 | 0        |
| 0 | 0 | 0        | 0 | 0.001709 | 0        | 0 | 0 | 0        |
| 0 | 0 | 0        | 0 | 0.002038 | 0        | 0 | 0 | 0        |
| 0 | 0 | 0        | 0 | 0.001348 | 0        | 0 | 0 | 0        |
| 0 | 0 | 0        | 0 | 0.000592 | 0        | 0 | 0 | 0        |
| 0 | 0 | 0        | 0 | 0.001019 | 0        | 0 | 0 | 0        |
| 0 | 0 | 0        | 0 | 0.002038 | 0        | 0 | 0 | 0        |
| 0 | 0 | 0        | 0 | 0.001578 | 0        | 0 | 0 | 0        |
| 0 | 0 | 0        | 0 | 0.001052 | 0        | 0 | 0 | 0        |
| 0 | 0 | 3.29E-05 | 0 | 0.000756 | 0        | 0 | 0 | 0        |
| 0 | 0 | 0        | 0 | 0.000559 | 0        | 0 | 0 | 0        |
| 0 | 0 | 0        | 0 | 0        | 0        | 0 | 0 | 0        |
| 0 | 0 | 0        | 0 | 0.00046  | 0        | 0 | 0 | 0        |
| 0 | 0 | 0        | 0 | 0.000131 | 0        | 0 | 0 | 0        |
| 0 | 0 | 0        | 0 | 3.29E-05 | 0        | 0 | 0 | 0        |
| 0 | 0 | 0        | 0 | 0.000592 | 0        | 0 | 0 | 0        |
| 0 | 0 | 0        | 0 | 0        | 0        | 0 | 0 | 0        |
| 0 | 0 | 0        | 0 | 9.86E-05 | 0        | 0 | 0 | 0        |
| 0 | 0 | 0        | 0 | 9.86E-05 | 0        | 0 | 0 | 0        |
| 0 | 0 | 0        | 0 | 0.000657 | 0        | 0 | 0 | 0        |
| 0 | 0 | 0        | 0 | 0.001019 | 0        | 0 | 0 | 0        |
| 0 | 0 | 0        | 0 | 0.000888 | 0        | 0 | 0 | 0        |
| 0 | 0 | 0        | 0 | 0.001677 | 0        | 0 | 0 | 0        |
| 0 | 0 | 0        | 0 | 0.001019 | 0        | 0 | 0 | 0        |
| 0 | 0 | 0        | 0 | 0.00046  | 0        | 0 | 0 | 0        |
| 0 | 0 | 0        | 0 | 0.001381 | 0        | 0 | 0 | 0        |
| 0 | 0 | 0        | 0 | 0.002104 | 0        | 0 | 0 | 0        |
| 0 | 0 | 0        | 0 | 0.001183 | 0        | 0 | 0 | 0        |
| 0 | 0 | 0        | 0 | 0.001381 | 0        | 0 | 0 | 0        |
| 0 | 0 | 0        | 0 | 0.001282 | 0        | 0 | 0 | 0        |
| 0 | 0 | 0        | 0 | 0.000131 | 0        | 0 | 0 | 0        |
| 0 | 0 | 0        | 0 | 6.57E-05 | 0        | 0 | 0 | 0        |
| 0 | 0 | 0        | 0 | 0.000394 | 0        | 0 | 0 | 0        |
| 0 | 0 | 0        | 0 | 0.00046  | 0        | 0 | 0 | 0        |

|          |   |   |   |          |          |   |          |          |
|----------|---|---|---|----------|----------|---|----------|----------|
| 0        | 0 | 0 | 0 | 0.002729 | 0        | 0 | 0        | 0        |
| 0        | 0 | 0 | 0 | 0.001709 | 6.57E-05 | 0 | 0        | 0        |
| 0        | 0 | 0 | 0 | 0.00046  | 0        | 0 | 0        | 0        |
| 0        | 0 | 0 | 0 | 0.002893 | 0        | 0 | 0        | 0        |
| 0        | 0 | 0 | 0 | 0.001545 | 0        | 0 | 0        | 0        |
| 0        | 0 | 0 | 0 | 0.001742 | 0        | 0 | 0        | 0        |
| 0        | 0 | 0 | 0 | 0.001479 | 0        | 0 | 0        | 0        |
| 0        | 0 | 0 | 0 | 0.000526 | 0        | 0 | 0        | 0        |
| 0        | 0 | 0 | 0 | 0.00092  | 0        | 0 | 0        | 0        |
| 0        | 0 | 0 | 0 | 0.000526 | 0        | 0 | 0        | 0        |
| 0        | 0 | 0 | 0 | 0.000362 | 0        | 0 | 0        | 0        |
| 0        | 0 | 0 | 0 | 0.000263 | 0        | 0 | 0        | 0        |
| 0        | 0 | 0 | 0 | 0.001151 | 0        | 0 | 0        | 0        |
| 0        | 0 | 0 | 0 | 0.000164 | 0        | 0 | 0        | 0        |
| 0        | 0 | 0 | 0 | 0.000164 | 0        | 0 | 0        | 0        |
| 0        | 0 | 0 | 0 | 0.000625 | 0        | 0 | 0        | 0        |
| 0        | 0 | 0 | 0 | 6.57E-05 | 0        | 0 | 0        | 0        |
| 0        | 0 | 0 | 0 | 0.000197 | 0        | 0 | 0        | 0        |
| 0        | 0 | 0 | 0 | 0.000197 | 0        | 0 | 0        | 0        |
| 0        | 0 | 0 | 0 | 0.000592 | 0        | 0 | 0        | 0        |
| 0        | 0 | 0 | 0 | 3.29E-05 | 0        | 0 | 0        | 0        |
| 0        | 0 | 0 | 0 | 0.000197 | 0        | 0 | 0        | 0        |
| 0        | 0 | 0 | 0 | 0.000329 | 0        | 0 | 0        | 0        |
| 0        | 0 | 0 | 0 | 0.00023  | 0        | 0 | 0        | 0        |
| 0        | 0 | 0 | 0 | 0        | 0        | 0 | 0        | 0        |
| 0        | 0 | 0 | 0 | 0        | 0        | 0 | 0        | 0        |
| 0        | 0 | 0 | 0 | 0        | 0        | 0 | 0        | 0        |
| 0        | 0 | 0 | 0 | 3.29E-05 | 0        | 0 | 0        | 0        |
| 0        | 0 | 0 | 0 | 0.001677 | 0        | 0 | 0        | 0        |
| 0        | 0 | 0 | 0 | 0.000263 | 0        | 0 | 0        | 0        |
| 0        | 0 | 0 | 0 | 0        | 0        | 0 | 0        | 0        |
| 0        | 0 | 0 | 0 | 0        | 0        | 0 | 0        | 0        |
| 0        | 0 | 0 | 0 | 0.000263 | 0        | 0 | 0        | 0        |
| 0        | 0 | 0 | 0 | 0.002433 | 0        | 0 | 0        | 0        |
| 0        | 0 | 0 | 0 | 0.000592 | 0        | 0 | 0        | 0        |
| 0        | 0 | 0 | 0 | 9.86E-05 | 0        | 0 | 0        | 0        |
| 0        | 0 | 0 | 0 | 0.014793 | 0        | 0 | 0        | 0        |
| 0        | 0 | 0 | 0 | 3.29E-05 | 0        | 0 | 0        | 0        |
| 0        | 0 | 0 | 0 | 0.000592 | 0        | 0 | 0        | 0        |
| 0        | 0 | 0 | 0 | 0.000723 | 0        | 0 | 0        | 0        |
| 0        | 0 | 0 | 0 | 0.001512 | 0.000263 | 0 | 0.000164 | 0.001052 |
| 0        | 0 | 0 | 0 | 0.001644 | 0        | 0 | 0        | 0        |
| 3.29E-05 | 0 | 0 | 0 | 0.003616 | 0        | 0 | 0        | 0        |
| 0        | 0 | 0 | 0 | 0.001841 | 0        | 0 | 0        | 0        |
| 0        | 0 | 0 | 0 | 0.0024   | 0        | 0 | 0        | 0        |
| 0        | 0 | 0 | 0 | 0.001315 | 0        | 0 | 0        | 0        |
| 0        | 0 | 0 | 0 | 0.001381 | 0        | 0 | 0        | 0        |



|   |   |   |   |          |   |          |   |   |
|---|---|---|---|----------|---|----------|---|---|
| 0 | 0 | 0 | 0 | 0.003452 | 0 | 0        | 0 | 0 |
| 0 | 0 | 0 | 0 | 0.002203 | 0 | 0        | 0 | 0 |
| 0 | 0 | 0 | 0 | 0.000789 | 0 | 0        | 0 | 0 |
| 0 | 0 | 0 | 0 | 0.00309  | 0 | 0        | 0 | 0 |
| 0 | 0 | 0 | 0 | 0.00194  | 0 | 0        | 0 | 0 |
| 0 | 0 | 0 | 0 | 0.003156 | 0 | 0        | 0 | 0 |
| 0 | 0 | 0 | 0 | 0.001841 | 0 | 0        | 0 | 0 |
| 0 | 0 | 0 | 0 | 0.000723 | 0 | 0        | 0 | 0 |
| 0 | 0 | 0 | 0 | 0.001315 | 0 | 0        | 0 | 0 |
| 0 | 0 | 0 | 0 | 0.002071 | 0 | 0        | 0 | 0 |
| 0 | 0 | 0 | 0 | 0.002794 | 0 | 0        | 0 | 0 |
| 0 | 0 | 0 | 0 | 0.000197 | 0 | 0        | 0 | 0 |
| 0 | 0 | 0 | 0 | 0.002729 | 0 | 0        | 0 | 0 |
| 0 | 0 | 0 | 0 | 0.006641 | 0 | 0        | 0 | 0 |
| 0 | 0 | 0 | 0 | 0.002334 | 0 | 0        | 0 | 0 |
| 0 | 0 | 0 | 0 | 6.57E-05 | 0 | 0        | 0 | 0 |
| 0 | 0 | 0 | 0 | 0.000625 | 0 | 0        | 0 | 0 |
| 0 | 0 | 0 | 0 | 0.000789 | 0 | 0        | 0 | 0 |
| 0 | 0 | 0 | 0 | 0.000131 | 0 | 0        | 0 | 0 |
| 0 | 0 | 0 | 0 | 6.57E-05 | 0 | 0        | 0 | 0 |
| 0 | 0 | 0 | 0 | 0.000986 | 0 | 0        | 0 | 0 |
| 0 | 0 | 0 | 0 | 0.001841 | 0 | 0        | 0 | 0 |
| 0 | 0 | 0 | 0 | 0.00023  | 0 | 0        | 0 | 0 |
| 0 | 0 | 0 | 0 | 0.001183 | 0 | 0        | 0 | 0 |
| 0 | 0 | 0 | 0 | 0.000263 | 0 | 0        | 0 | 0 |
| 0 | 0 | 0 | 0 | 0.000394 | 0 | 0        | 0 | 0 |
| 0 | 0 | 0 | 0 | 0.001348 | 0 | 0        | 0 | 0 |
| 0 | 0 | 0 | 0 | 0.001052 | 0 | 0        | 0 | 0 |
| 0 | 0 | 0 | 0 | 0.00263  | 0 | 0        | 0 | 0 |
| 0 | 0 | 0 | 0 | 0.001414 | 0 | 0        | 0 | 0 |
| 0 | 0 | 0 | 0 | 0.000427 | 0 | 0        | 0 | 0 |
| 0 | 0 | 0 | 0 | 9.86E-05 | 0 | 0        | 0 | 0 |
| 0 | 0 | 0 | 0 | 0        | 0 | 0        | 0 | 0 |
| 0 | 0 | 0 | 0 | 0.000164 | 0 | 0        | 0 | 0 |
| 0 | 0 | 0 | 0 | 0        | 0 | 0        | 0 | 0 |
| 0 | 0 | 0 | 0 | 0        | 0 | 0        | 0 | 0 |
| 0 | 0 | 0 | 0 | 0        | 0 | 0        | 0 | 0 |
| 0 | 0 | 0 | 0 | 0        | 0 | 0        | 0 | 0 |
| 0 | 0 | 0 | 0 | 0.001151 | 0 | 0        | 0 | 0 |
| 0 | 0 | 0 | 0 | 0.003057 | 0 | 0        | 0 | 0 |
| 0 | 0 | 0 | 0 | 0.001545 | 0 | 0        | 0 | 0 |
| 0 | 0 | 0 | 0 | 9.86E-05 | 0 | 0.000986 | 0 | 0 |
| 0 | 0 | 0 | 0 | 0.000756 | 0 | 0        | 0 | 0 |
| 0 | 0 | 0 | 0 | 0.000789 | 0 | 0.000427 | 0 | 0 |
| 0 | 0 | 0 | 0 | 0.001249 | 0 | 0        | 0 | 0 |
| 0 | 0 | 0 | 0 | 0.001479 | 0 | 0        | 0 | 0 |
| 0 | 0 | 0 | 0 | 0.000427 | 0 | 0        | 0 | 0 |

|   |   |   |   |          |   |          |   |   |
|---|---|---|---|----------|---|----------|---|---|
| 0 | 0 | 0 | 0 | 3.29E-05 | 0 | 0        | 0 | 0 |
| 0 | 0 | 0 | 0 | 0.000526 | 0 | 0        | 0 | 0 |
| 0 | 0 | 0 | 0 | 0        | 0 | 0        | 0 | 0 |
| 0 | 0 | 0 | 0 | 0.000427 | 0 | 0        | 0 | 0 |
| 0 | 0 | 0 | 0 | 0        | 0 | 0        | 0 | 0 |
| 0 | 0 | 0 | 0 | 0        | 0 | 0        | 0 | 0 |
| 0 | 0 | 0 | 0 | 6.57E-05 | 0 | 0        | 0 | 0 |
| 0 | 0 | 0 | 0 | 0        | 0 | 0        | 0 | 0 |
| 0 | 0 | 0 | 0 | 0        | 0 | 0        | 0 | 0 |
| 0 | 0 | 0 | 0 | 0        | 0 | 0        | 0 | 0 |
| 0 | 0 | 0 | 0 | 0        | 0 | 0        | 0 | 0 |
| 0 | 0 | 0 | 0 | 3.29E-05 | 0 | 0        | 0 | 0 |
| 0 | 0 | 0 | 0 | 3.29E-05 | 0 | 0        | 0 | 0 |
| 0 | 0 | 0 | 0 | 0        | 0 | 0        | 0 | 0 |
| 0 | 0 | 0 | 0 | 0        | 0 | 0        | 0 | 0 |
| 0 | 0 | 0 | 0 | 0        | 0 | 0        | 0 | 0 |
| 0 | 0 | 0 | 0 | 0        | 0 | 0        | 0 | 0 |
| 0 | 0 | 0 | 0 | 0.009534 | 0 | 0        | 0 | 0 |
| 0 | 0 | 0 | 0 | 0.008679 | 0 | 0        | 0 | 0 |
| 0 | 0 | 0 | 0 | 0.00332  | 0 | 0        | 0 | 0 |
| 0 | 0 | 0 | 0 | 0.002301 | 0 | 0        | 0 | 0 |
| 0 | 0 | 0 | 0 | 0.001414 | 0 | 0        | 0 | 0 |
| 0 | 0 | 0 | 0 | 0.002466 | 0 | 0        | 0 | 0 |
| 0 | 0 | 0 | 0 | 0.001907 | 0 | 0        | 0 | 0 |
| 0 | 0 | 0 | 0 | 0.001249 | 0 | 0        | 0 | 0 |
| 0 | 0 | 0 | 0 | 0.001677 | 0 | 0        | 0 | 0 |
| 0 | 0 | 0 | 0 | 0.00023  | 0 | 0        | 0 | 0 |
| 0 | 0 | 0 | 0 | 0.002203 | 0 | 0        | 0 | 0 |
| 0 | 0 | 0 | 0 | 0.000427 | 0 | 0        | 0 | 0 |
| 0 | 0 | 0 | 0 | 0.001052 | 0 | 0        | 0 | 0 |
| 0 | 0 | 0 | 0 | 0.001183 | 0 | 0        | 0 | 0 |
| 0 | 0 | 0 | 0 | 9.86E-05 | 0 | 0        | 0 | 0 |
| 0 | 0 | 0 | 0 | 0.000822 | 0 | 0        | 0 | 0 |
| 0 | 0 | 0 | 0 | 6.57E-05 | 0 | 0        | 0 | 0 |
| 0 | 0 | 0 | 0 | 0.000888 | 0 | 0        | 0 | 0 |
| 0 | 0 | 0 | 0 | 0.000953 | 0 | 0        | 0 | 0 |
| 0 | 0 | 0 | 0 | 0.001118 | 0 | 0        | 0 | 0 |
| 0 | 0 | 0 | 0 | 0.002137 | 0 | 0.000986 | 0 | 0 |
| 0 | 0 | 0 | 0 | 0.000592 | 0 | 0        | 0 | 0 |
| 0 | 0 | 0 | 0 | 0.002663 | 0 | 0        | 0 | 0 |
| 0 | 0 | 0 | 0 | 0.002104 | 0 | 0        | 0 | 0 |
| 0 | 0 | 0 | 0 | 0.000657 | 0 | 0        | 0 | 0 |
| 0 | 0 | 0 | 0 | 0.001775 | 0 | 0        | 0 | 0 |
| 0 | 0 | 0 | 0 | 0.002466 | 0 | 0        | 0 | 0 |
| 0 | 0 | 0 | 0 | 0        | 0 | 0        | 0 | 0 |
| 0 | 0 | 0 | 0 | 0.000526 | 0 | 0        | 0 | 0 |
| 0 | 0 | 0 | 0 | 0.000559 | 0 | 0        | 0 | 0 |

|   |   |   |   |          |   |          |   |          |
|---|---|---|---|----------|---|----------|---|----------|
| 0 | 0 | 0 | 0 | 0.002367 | 0 | 0        | 0 | 0        |
| 0 | 0 | 0 | 0 | 0.000953 | 0 | 0        | 0 | 0        |
| 0 | 0 | 0 | 0 | 0.000131 | 0 | 0        | 0 | 0        |
| 0 | 0 | 0 | 0 | 0.004767 | 0 | 0        | 0 | 0        |
| 0 | 0 | 0 | 0 | 0.000329 | 0 | 0        | 0 | 0        |
| 0 | 0 | 0 | 0 | 0.001151 | 0 | 0        | 0 | 0        |
| 0 | 0 | 0 | 0 | 0.000986 | 0 | 0        | 0 | 0        |
| 0 | 0 | 0 | 0 | 9.86E-05 | 0 | 0        | 0 | 0        |
| 0 | 0 | 0 | 0 | 0.000756 | 0 | 3.29E-05 | 0 | 0        |
| 0 | 0 | 0 | 0 | 0.000131 | 0 | 0        | 0 | 0        |
| 0 | 0 | 0 | 0 | 0.000526 | 0 | 0        | 0 | 0        |
| 0 | 0 | 0 | 0 | 0.000855 | 0 | 0        | 0 | 0        |
| 0 | 0 | 0 | 0 | 0.004471 | 0 | 0        | 0 | 0        |
| 0 | 0 | 0 | 0 | 0.002794 | 0 | 0        | 0 | 0        |
| 0 | 0 | 0 | 0 | 0.002597 | 0 | 0        | 0 | 0        |
| 0 | 0 | 0 | 0 | 0.001282 | 0 | 0        | 0 | 0        |
| 0 | 0 | 0 | 0 | 0.001315 | 0 | 0.001611 | 0 | 0        |
| 0 | 0 | 0 | 0 | 0.002203 | 0 | 0        | 0 | 0        |
| 0 | 0 | 0 | 0 | 0.001512 | 0 | 0        | 0 | 0        |
| 0 | 0 | 0 | 0 | 0.000526 | 0 | 0        | 0 | 0        |
| 0 | 0 | 0 | 0 | 0.001479 | 0 | 0        | 0 | 0        |
| 0 | 0 | 0 | 0 | 0.001709 | 0 | 0        | 0 | 0        |
| 0 | 0 | 0 | 0 | 0.001315 | 0 | 0        | 0 | 0        |
| 0 | 0 | 0 | 0 | 0.003024 | 0 | 0        | 0 | 0        |
| 0 | 0 | 0 | 0 | 0.003682 | 0 | 0        | 0 | 0        |
| 0 | 0 | 0 | 0 | 0.00023  | 0 | 0        | 0 | 0        |
| 0 | 0 | 0 | 0 | 0.000657 | 0 | 0        | 0 | 0        |
| 0 | 0 | 0 | 0 | 0.002071 | 0 | 0        | 0 | 0        |
| 0 | 0 | 0 | 0 | 0.000427 | 0 | 0        | 0 | 0        |
| 0 | 0 | 0 | 0 | 0.001907 | 0 | 0        | 0 | 0        |
| 0 | 0 | 0 | 0 | 0.002531 | 0 | 0        | 0 | 0        |
| 0 | 0 | 0 | 0 | 0.001085 | 0 | 0        | 0 | 0        |
| 0 | 0 | 0 | 0 | 0.000526 | 0 | 0        | 0 | 0        |
| 0 | 0 | 0 | 0 | 0.001183 | 0 | 0        | 0 | 0        |
| 0 | 0 | 0 | 0 | 0.00457  | 0 | 0        | 0 | 0        |
| 0 | 0 | 0 | 0 | 0        | 0 | 0        | 0 | 3.29E-05 |
| 0 | 0 | 0 | 0 | 0        | 0 | 0        | 0 | 0        |
| 0 | 0 | 0 | 0 | 3.29E-05 | 0 | 0        | 0 | 0        |
| 0 | 0 | 0 | 0 | 0        | 0 | 0        | 0 | 0        |
| 0 | 0 | 0 | 0 | 0        | 0 | 0        | 0 | 0.000197 |
| 0 | 0 | 0 | 0 | 0.000855 | 0 | 9.86E-05 | 0 | 0        |
| 0 | 0 | 0 | 0 | 0        | 0 | 0        | 0 | 0        |
| 0 | 0 | 0 | 0 | 0        | 0 | 0        | 0 | 0        |
| 0 | 0 | 0 | 0 | 3.29E-05 | 0 | 0        | 0 | 0        |
| 0 | 0 | 0 | 0 | 0        | 0 | 0        | 0 | 0        |
| 0 | 0 | 0 | 0 | 0.008416 | 0 | 0.00046  | 0 | 0        |
| 0 | 0 | 0 | 0 | 0.002367 | 0 | 0        | 0 | 0        |

|   |   |   |   |          |          |          |   |          |
|---|---|---|---|----------|----------|----------|---|----------|
| 0 | 0 | 0 | 0 | 0.00309  | 0        | 0        | 0 | 0        |
| 0 | 0 | 0 | 0 | 0.001874 | 0        | 0        | 0 | 0        |
| 0 | 0 | 0 | 0 | 0.001052 | 0        | 0        | 0 | 0        |
| 0 | 0 | 0 | 0 | 0.000296 | 0        | 0        | 0 | 0        |
| 0 | 0 | 0 | 0 | 0.002926 | 0        | 0        | 0 | 0        |
| 0 | 0 | 0 | 0 | 0.001216 | 0        | 0        | 0 | 0        |
| 0 | 0 | 0 | 0 | 0.000394 | 0        | 0        | 0 | 0        |
| 0 | 0 | 0 | 0 | 0.000263 | 0        | 0        | 0 | 0        |
| 0 | 0 | 0 | 0 | 0        | 0        | 0        | 0 | 0        |
| 0 | 0 | 0 | 0 | 0.001972 | 0        | 0        | 0 | 0        |
| 0 | 0 | 0 | 0 | 0.000394 | 0        | 0        | 0 | 0        |
| 0 | 0 | 0 | 0 | 0.000888 | 0        | 0        | 0 | 0        |
| 0 | 0 | 0 | 0 | 3.29E-05 | 0        | 0        | 0 | 0        |
| 0 | 0 | 0 | 0 | 3.29E-05 | 0        | 0        | 0 | 0        |
| 0 | 0 | 0 | 0 | 0        | 0        | 0        | 0 | 0        |
| 0 | 0 | 0 | 0 | 6.57E-05 | 0        | 0        | 0 | 0        |
| 0 | 0 | 0 | 0 | 0        | 0        | 0        | 0 | 0        |
| 0 | 0 | 0 | 0 | 0        | 0        | 0.007693 | 0 | 0        |
| 0 | 0 | 0 | 0 | 0        | 0        | 0        | 0 | 0        |
| 0 | 0 | 0 | 0 | 0        | 0        | 0        | 0 | 0        |
| 0 | 0 | 0 | 0 | 0        | 0        | 0        | 0 | 0        |
| 0 | 0 | 0 | 0 | 6.57E-05 | 0        | 0        | 0 | 0        |
| 0 | 0 | 0 | 0 | 0        | 3.29E-05 | 0        | 0 | 0        |
| 0 | 0 | 0 | 0 | 0        | 0        | 0        | 0 | 0        |
| 0 | 0 | 0 | 0 | 0.000723 | 0        | 0        | 0 | 0        |
| 0 | 0 | 0 | 0 | 0.000657 | 0        | 0        | 0 | 0        |
| 0 | 0 | 0 | 0 | 0.000394 | 0        | 0        | 0 | 3.29E-05 |
| 0 | 0 | 0 | 0 | 0.002433 | 0        | 0        | 0 | 0        |
| 0 | 0 | 0 | 0 | 0.00092  | 0        | 0        | 0 | 0        |
| 0 | 0 | 0 | 0 | 0.00263  | 0        | 0        | 0 | 0        |
| 0 | 0 | 0 | 0 | 0.002334 | 0        | 0        | 0 | 0        |
| 0 | 0 | 0 | 0 | 0.001709 | 0        | 0        | 0 | 0        |
| 0 | 0 | 0 | 0 | 0.000559 | 0        | 0        | 0 | 0        |
| 0 | 0 | 0 | 0 | 0.003583 | 0        | 0        | 0 | 0        |
| 0 | 0 | 0 | 0 | 0.000296 | 0        | 0        | 0 | 0        |
| 0 | 0 | 0 | 0 | 6.57E-05 | 0        | 0        | 0 | 0        |
| 0 | 0 | 0 | 0 | 0.001052 | 0        | 0        | 0 | 0        |
| 0 | 0 | 0 | 0 | 0        | 0        | 0.000394 | 0 | 0        |
| 0 | 0 | 0 | 0 | 0        | 0        | 0        | 0 | 0        |
| 0 | 0 | 0 | 0 | 0.000164 | 0        | 0        | 0 | 0        |
| 0 | 0 | 0 | 0 | 0.000197 | 0        | 0        | 0 | 0        |
| 0 | 0 | 0 | 0 | 0.011703 | 0        | 0        | 0 | 0        |
| 0 | 0 | 0 | 0 | 0.002761 | 0        | 0        | 0 | 0        |
| 0 | 0 | 0 | 0 | 0.002827 | 0        | 9.86E-05 | 0 | 0        |
| 0 | 0 | 0 | 0 | 0.007101 | 0        | 0        | 0 | 0        |
| 0 | 0 | 0 | 0 | 0.000657 | 0        | 0        | 0 | 0        |
| 0 | 0 | 0 | 0 | 0.001118 | 0        | 0        | 0 | 0        |

|   |   |   |   |          |          |          |   |   |
|---|---|---|---|----------|----------|----------|---|---|
| 0 | 0 | 0 | 0 | 0.000394 | 0        | 0        | 0 | 0 |
| 0 | 0 | 0 | 0 | 0.001183 | 0        | 0        | 0 | 0 |
| 0 | 0 | 0 | 0 | 0.000822 | 0        | 0        | 0 | 0 |
| 0 | 0 | 0 | 0 | 0.000822 | 0        | 0        | 0 | 0 |
| 0 | 0 | 0 | 0 | 0.001578 | 0        | 0        | 0 | 0 |
| 0 | 0 | 0 | 0 | 0.00092  | 0        | 0        | 0 | 0 |
| 0 | 0 | 0 | 0 | 0.001446 | 0        | 0        | 0 | 0 |
| 0 | 0 | 0 | 0 | 0.000657 | 0        | 0        | 0 | 0 |
| 0 | 0 | 0 | 0 | 0.001183 | 0        | 0        | 0 | 0 |
| 0 | 0 | 0 | 0 | 0.000394 | 0        | 0        | 0 | 0 |
| 0 | 0 | 0 | 0 | 0.000657 | 0        | 0        | 0 | 0 |
| 0 | 0 | 0 | 0 | 0.000986 | 0        | 0        | 0 | 0 |
| 0 | 0 | 0 | 0 | 0.000592 | 0        | 0        | 0 | 0 |
| 0 | 0 | 0 | 0 | 0.000526 | 0        | 6.57E-05 | 0 | 0 |
| 0 | 0 | 0 | 0 | 0.000197 | 0        | 0        | 0 | 0 |
| 0 | 0 | 0 | 0 | 0.000559 | 0        | 0        | 0 | 0 |
| 0 | 0 | 0 | 0 | 0.000164 | 0        | 0        | 0 | 0 |
| 0 | 0 | 0 | 0 | 0.000493 | 0        | 0        | 0 | 0 |
| 0 | 0 | 0 | 0 | 0.000362 | 0        | 0        | 0 | 0 |
| 0 | 0 | 0 | 0 | 0.000657 | 0        | 0        | 0 | 0 |
| 0 | 0 | 0 | 0 | 0.000329 | 0        | 0        | 0 | 0 |
| 0 | 0 | 0 | 0 | 0.000394 | 0        | 0        | 0 | 0 |
| 0 | 0 | 0 | 0 | 9.86E-05 | 0        | 0        | 0 | 0 |
| 0 | 0 | 0 | 0 | 3.29E-05 | 0        | 0        | 0 | 0 |
| 0 | 0 | 0 | 0 | 0.000559 | 0        | 0        | 0 | 0 |
| 0 | 0 | 0 | 0 | 0        | 0        | 0        | 0 | 0 |
| 0 | 0 | 0 | 0 | 0.000131 | 0        | 0        | 0 | 0 |
| 0 | 0 | 0 | 0 | 0        | 0        | 0        | 0 | 0 |
| 0 | 0 | 0 | 0 | 0        | 0        | 0        | 0 | 0 |
| 0 | 0 | 0 | 0 | 0        | 0        | 0        | 0 | 0 |
| 0 | 0 | 0 | 0 | 0        | 0        | 0        | 0 | 0 |
| 0 | 0 | 0 | 0 | 0        | 0        | 0        | 0 | 0 |
| 0 | 0 | 0 | 0 | 0        | 0        | 0        | 0 | 0 |
| 0 | 0 | 0 | 0 | 0        | 0        | 0        | 0 | 0 |
| 0 | 0 | 0 | 0 | 0        | 3.29E-05 | 0        | 0 | 0 |
| 0 | 0 | 0 | 0 | 0        | 0        | 0        | 0 | 0 |
| 0 | 0 | 0 | 0 | 6.57E-05 | 0        | 0        | 0 | 0 |
| 0 | 0 | 0 | 0 | 0.002268 | 0        | 0        | 0 | 0 |
| 0 | 0 | 0 | 0 | 0.001381 | 0        | 0        | 0 | 0 |
| 0 | 0 | 0 | 0 | 0.001183 | 0        | 0        | 0 | 0 |
| 0 | 0 | 0 | 0 | 0.004537 | 0        | 0        | 0 | 0 |
| 0 | 0 | 0 | 0 | 0.002367 | 0        | 0        | 0 | 0 |
| 0 | 0 | 0 | 0 | 0.00263  | 0        | 0        | 0 | 0 |
| 0 | 0 | 0 | 0 | 0.000164 | 0        | 0        | 0 | 0 |
| 0 | 0 | 0 | 0 | 0.002794 | 0        | 0        | 0 | 0 |
| 0 | 0 | 0 | 0 | 0.001874 | 0        | 0        | 0 | 0 |
| 0 | 0 | 0 | 0 | 0.001118 | 0        | 0        | 0 | 0 |
| 0 | 0 | 0 | 0 | 0.000394 | 0        | 0        | 0 | 0 |
| 0 | 0 | 0 | 0 | 0.000789 | 0        | 0        | 0 | 0 |

|          |   |   |   |          |   |          |   |          |
|----------|---|---|---|----------|---|----------|---|----------|
| 0        | 0 | 0 | 0 | 0.000164 | 0 | 9.86E-05 | 0 | 0        |
| 0        | 0 | 0 | 0 | 0.001611 | 0 | 0        | 0 | 0        |
| 0        | 0 | 0 | 0 | 0.003616 | 0 | 0        | 0 | 0        |
| 0        | 0 | 0 | 0 | 0.002794 | 0 | 0        | 0 | 0        |
| 3.29E-05 | 0 | 0 | 0 | 0.001216 | 0 | 0        | 0 | 0        |
| 0        | 0 | 0 | 0 | 0.000559 | 0 | 0        | 0 | 0        |
| 0        | 0 | 0 | 0 | 0.00092  | 0 | 3.29E-05 | 0 | 0        |
| 0        | 0 | 0 | 0 | 0.002959 | 0 | 0        | 0 | 0        |
| 0        | 0 | 0 | 0 | 6.57E-05 | 0 | 0        | 0 | 0        |
| 0        | 0 | 0 | 0 | 0.000559 | 0 | 0        | 0 | 9.86E-05 |
| 0        | 0 | 0 | 0 | 0.001841 | 0 | 0        | 0 | 0        |
| 0        | 0 | 0 | 0 | 0.000625 | 0 | 0        | 0 | 0        |
| 0        | 0 | 0 | 0 | 0.00023  | 0 | 0        | 0 | 0        |
| 0        | 0 | 0 | 0 | 0.000394 | 0 | 0        | 0 | 0        |
| 0        | 0 | 0 | 0 | 0.000427 | 0 | 0        | 0 | 0        |
| 0        | 0 | 0 | 0 | 0.000657 | 0 | 0        | 0 | 0        |
| 0        | 0 | 0 | 0 | 6.57E-05 | 0 | 0        | 0 | 0        |
| 0        | 0 | 0 | 0 | 0.001183 | 0 | 0        | 0 | 0        |
| 0        | 0 | 0 | 0 | 0.001348 | 0 | 0        | 0 | 0        |
| 0        | 0 | 0 | 0 | 0.000559 | 0 | 0        | 0 | 0        |
| 0        | 0 | 0 | 0 | 0.001052 | 0 | 0        | 0 | 0        |
| 0        | 0 | 0 | 0 | 0.003781 | 0 | 0        | 0 | 0        |
| 0        | 0 | 0 | 0 | 0.000131 | 0 | 0        | 0 | 0        |







|   |          |   |          |   |   |   |          |   |
|---|----------|---|----------|---|---|---|----------|---|
| 0 | 0        | 0 | 0        | 0 | 0 | 0 | 0        | 0 |
| 0 | 0        | 0 | 0        | 0 | 0 | 0 | 0        | 0 |
| 0 | 0        | 0 | 6.57E-05 | 0 | 0 | 0 | 0        | 0 |
| 0 | 3.29E-05 | 0 | 3.29E-05 | 0 | 0 | 0 | 6.57E-05 | 0 |
| 0 | 0        | 0 | 0        | 0 | 0 | 0 | 0        | 0 |
| 0 | 0        | 0 | 0        | 0 | 0 | 0 | 0        | 0 |
| 0 | 0        | 0 | 0        | 0 | 0 | 0 | 0        | 0 |
| 0 | 0        | 0 | 0        | 0 | 0 | 0 | 0        | 0 |
| 0 | 0        | 0 | 0        | 0 | 0 | 0 | 0        | 0 |
| 0 | 0        | 0 | 0        | 0 | 0 | 0 | 0        | 0 |
| 0 | 0        | 0 | 0        | 0 | 0 | 0 | 0        | 0 |
| 0 | 0        | 0 | 3.29E-05 | 0 | 0 | 0 | 0        | 0 |
| 0 | 0        | 0 | 0        | 0 | 0 | 0 | 0        | 0 |
| 0 | 0        | 0 | 3.29E-05 | 0 | 0 | 0 | 0        | 0 |
| 0 | 0        | 0 | 0        | 0 | 0 | 0 | 0        | 0 |
| 0 | 0        | 0 | 0        | 0 | 0 | 0 | 0        | 0 |
| 0 | 0        | 0 | 0.00217  | 0 | 0 | 0 | 0        | 0 |
| 0 | 0        | 0 | 3.29E-05 | 0 | 0 | 0 | 0        | 0 |
| 0 | 0        | 0 | 0        | 0 | 0 | 0 | 0        | 0 |
| 0 | 0        | 0 | 3.29E-05 | 0 | 0 | 0 | 0        | 0 |
| 0 | 0        | 0 | 0.00023  | 0 | 0 | 0 | 0        | 0 |
| 0 | 6.57E-05 | 0 | 0        | 0 | 0 | 0 | 0        | 0 |
| 0 | 0.000329 | 0 | 0        | 0 | 0 | 0 | 0        | 0 |
| 0 | 3.29E-05 | 0 | 0        | 0 | 0 | 0 | 0        | 0 |
| 0 | 3.29E-05 | 0 | 0        | 0 | 0 | 0 | 0        | 0 |
| 0 | 0        | 0 | 0        | 0 | 0 | 0 | 0        | 0 |
| 0 | 0        | 0 | 0        | 0 | 0 | 0 | 0        | 0 |
| 0 | 0        | 0 | 0        | 0 | 0 | 0 | 0        | 0 |
| 0 | 0        | 0 | 0        | 0 | 0 | 0 | 0        | 0 |
| 0 | 0        | 0 | 0        | 0 | 0 | 0 | 0        | 0 |
| 0 | 0.000164 | 0 | 0        | 0 | 0 | 0 | 0        | 0 |
| 0 | 0        | 0 | 6.57E-05 | 0 | 0 | 0 | 0        | 0 |
| 0 | 0.000131 | 0 | 0        | 0 | 0 | 0 | 0        | 0 |
| 0 | 0.000131 | 0 | 9.86E-05 | 0 | 0 | 0 | 0        | 0 |
| 0 | 0        | 0 | 0        | 0 | 0 | 0 | 0        | 0 |
| 0 | 3.29E-05 | 0 | 0        | 0 | 0 | 0 | 0        | 0 |
| 0 | 0        | 0 | 0        | 0 | 0 | 0 | 0        | 0 |
| 0 | 3.29E-05 | 0 | 0        | 0 | 0 | 0 | 0        | 0 |
| 0 | 0        | 0 | 0        | 0 | 0 | 0 | 0        | 0 |
| 0 | 0.001414 | 0 | 0        | 0 | 0 | 0 | 0        | 0 |
| 0 | 3.29E-05 | 0 | 0        | 0 | 0 | 0 | 0.000197 | 0 |
| 0 | 3.29E-05 | 0 | 3.29E-05 | 0 | 0 | 0 | 0        | 0 |
| 0 | 0.00023  | 0 | 0        | 0 | 0 | 0 | 0        | 0 |
| 0 | 0        | 0 | 0        | 0 | 0 | 0 | 0        | 0 |
| 0 | 0        | 0 | 0        | 0 | 0 | 0 | 3.29E-05 | 0 |
| 0 | 0.000329 | 0 | 3.29E-05 | 0 | 0 | 0 | 0        | 0 |



|          |          |   |          |   |   |          |          |          |
|----------|----------|---|----------|---|---|----------|----------|----------|
| 0        | 0        | 0 | 0        | 0 | 0 | 0        | 0        | 0        |
| 0        | 0        | 0 | 0        | 0 | 0 | 0        | 0        | 0        |
| 0        | 0        | 0 | 0.000263 | 0 | 0 | 0        | 0        | 0        |
| 0        | 0        | 0 | 0        | 0 | 0 | 0        | 0        | 0        |
| 0        | 0        | 0 | 0        | 0 | 0 | 0        | 0        | 0        |
| 0        | 0        | 0 | 3.29E-05 | 0 | 0 | 0        | 0        | 0        |
| 0        | 0        | 0 | 0        | 0 | 0 | 0        | 0        | 0        |
| 0        | 0        | 0 | 0        | 0 | 0 | 0        | 0        | 0        |
| 0        | 0        | 0 | 0        | 0 | 0 | 0        | 0        | 0        |
| 0        | 0        | 0 | 0        | 0 | 0 | 3.29E-05 | 0        | 0        |
| 0        | 0        | 0 | 0        | 0 | 0 | 0        | 0        | 0        |
| 6.57E-05 | 0.000329 | 0 | 0        | 0 | 0 | 0        | 0        | 0        |
| 0        | 0.00023  | 0 | 0        | 0 | 0 | 0        | 0        | 0        |
| 0        | 6.57E-05 | 0 | 0        | 0 | 0 | 0        | 0        | 0        |
| 3.29E-05 | 0.000296 | 0 | 0        | 0 | 0 | 0        | 0        | 0        |
| 0        | 0        | 0 | 0.000164 | 0 | 0 | 0        | 0        | 0        |
| 0        | 0        | 0 | 0        | 0 | 0 | 6.57E-05 | 0        | 0        |
| 0        | 0        | 0 | 3.29E-05 | 0 | 0 | 0        | 0        | 0        |
| 0        | 0        | 0 | 0.08189  | 0 | 0 | 0        | 0        | 0.001545 |
| 0        | 0        | 0 | 0.042309 | 0 | 0 | 0        | 0        | 0.001019 |
| 0        | 0        | 0 | 0.010257 | 0 | 0 | 0        | 0        | 0.000197 |
| 0        | 0        | 0 | 0.083895 | 0 | 0 | 0        | 0        | 0.001709 |
| 0        | 0        | 0 | 0        | 0 | 0 | 0        | 0        | 0        |
| 0        | 0        | 0 | 0        | 0 | 0 | 0        | 0        | 0        |
| 0        | 0.000329 | 0 | 0        | 0 | 0 | 0        | 0        | 0        |
| 0        | 0.000263 | 0 | 0.000197 | 0 | 0 | 0        | 3.29E-05 | 0        |
| 0        | 0        | 0 | 0.003353 | 0 | 0 | 0        | 3.29E-05 | 0        |
| 0        | 3.29E-05 | 0 | 0.003419 | 0 | 0 | 0        | 0        | 0        |
| 0        | 0.000263 | 0 | 3.29E-05 | 0 | 0 | 0        | 0        | 0        |
| 0        | 0        | 0 | 0        | 0 | 0 | 0        | 0        | 0        |
| 0        | 0.000493 | 0 | 0.000855 | 0 | 0 | 0        | 6.57E-05 | 0        |
| 0        | 0        | 0 | 0        | 0 | 0 | 0        | 0        | 0        |
| 0        | 0        | 0 | 6.57E-05 | 0 | 0 | 0        | 0        | 0        |
| 0        | 0        | 0 | 0        | 0 | 0 | 0        | 0        | 0        |
| 0        | 0        | 0 | 0        | 0 | 0 | 0        | 0        | 0        |
| 0        | 0        | 0 | 0        | 0 | 0 | 0        | 0        | 0        |
| 0        | 0        | 0 | 0        | 0 | 0 | 0        | 0        | 0        |
| 0        | 0        | 0 | 0        | 0 | 0 | 0        | 0        | 0        |
| 0        | 0        | 0 | 0        | 0 | 0 | 0        | 0        | 0        |
| 0        | 0        | 0 | 0        | 0 | 0 | 0        | 0        | 0        |
| 9.86E-05 | 9.86E-05 | 0 | 9.86E-05 | 0 | 0 | 0        | 0        | 0        |
| 0        | 0.000131 | 0 | 0        | 0 | 0 | 0        | 0        | 0        |
| 0        | 0.000362 | 0 | 9.86E-05 | 0 | 0 | 0        | 0        | 3.29E-05 |
| 0        | 0.000362 | 0 | 0        | 0 | 0 | 0        | 0        | 0        |
| 0        | 0.00023  | 0 | 0        | 0 | 0 | 0        | 0        | 0        |
| 0        | 0.000493 | 0 | 0        | 0 | 0 | 0        | 0        | 0        |
| 0        | 0.000493 | 0 | 0.000164 | 0 | 0 | 0        | 0        | 0        |
| 0        | 0.000164 | 0 | 3.29E-05 | 0 | 0 | 0        | 0        | 0        |



|   |          |   |          |   |   |          |          |   |
|---|----------|---|----------|---|---|----------|----------|---|
| 0 | 0        | 0 | 6.57E-05 | 0 | 0 | 0        | 0        | 0 |
| 0 | 0.000197 | 0 | 3.29E-05 | 0 | 0 | 0        | 0        | 0 |
| 0 | 0        | 0 | 0        | 0 | 0 | 0        | 0        | 0 |
| 0 | 0        | 0 | 0.000427 | 0 | 0 | 0        | 0        | 0 |
| 0 | 0        | 0 | 0        | 0 | 0 | 0        | 0        | 0 |
| 0 | 0.00046  | 0 | 0        | 0 | 0 | 0        | 0        | 0 |
| 0 | 0        | 0 | 3.29E-05 | 0 | 0 | 0        | 0        | 0 |
| 0 | 0        | 0 | 6.57E-05 | 0 | 0 | 0        | 0        | 0 |
| 0 | 0        | 0 | 0        | 0 | 0 | 0        | 0        | 0 |
| 0 | 0        | 0 | 3.29E-05 | 0 | 0 | 0        | 0        | 0 |
| 0 | 0        | 0 | 0        | 0 | 0 | 0        | 6.57E-05 | 0 |
| 0 | 0        | 0 | 0        | 0 | 0 | 0        | 0.000164 | 0 |
| 0 | 0        | 0 | 0        | 0 | 0 | 0        | 0        | 0 |
| 0 | 0        | 0 | 0        | 0 | 0 | 0        | 0        | 0 |
| 0 | 0        | 0 | 3.29E-05 | 0 | 0 | 0        | 0        | 0 |
| 0 | 0        | 0 | 0        | 0 | 0 | 0        | 0        | 0 |
| 0 | 0        | 0 | 0.000559 | 0 | 0 | 0        | 0        | 0 |
| 0 | 0        | 0 | 0        | 0 | 0 | 0        | 0        | 0 |
| 0 | 0        | 0 | 0        | 0 | 0 | 0        | 0        | 0 |
| 0 | 0        | 0 | 0        | 0 | 0 | 0        | 0        | 0 |
| 0 | 0        | 0 | 0        | 0 | 0 | 0        | 0        | 0 |
| 0 | 0        | 0 | 0        | 0 | 0 | 0        | 0        | 0 |
| 0 | 0        | 0 | 3.29E-05 | 0 | 0 | 0        | 0        | 0 |
| 0 | 0        | 0 | 0        | 0 | 0 | 0        | 0        | 0 |
| 0 | 0        | 0 | 0.002959 | 0 | 0 | 0        | 0        | 0 |
| 0 | 0        | 0 | 3.29E-05 | 0 | 0 | 0        | 0        | 0 |
| 0 | 0        | 0 | 0.000427 | 0 | 0 | 0        | 0        | 0 |
| 0 | 0        | 0 | 0        | 0 | 0 | 0        | 0        | 0 |
| 0 | 0.000263 | 0 | 0        | 0 | 0 | 0        | 0        | 0 |
| 0 | 6.57E-05 | 0 | 0        | 0 | 0 | 0        | 0        | 0 |
| 0 | 0        | 0 | 0        | 0 | 0 | 0        | 0        | 0 |
| 0 | 0        | 0 | 0        | 0 | 0 | 0        | 0        | 0 |
| 0 | 0        | 0 | 0        | 0 | 0 | 0        | 0        | 0 |
| 0 | 0.000131 | 0 | 0        | 0 | 0 | 0        | 0        | 0 |
| 0 | 6.57E-05 | 0 | 0        | 0 | 0 | 0        | 0        | 0 |
| 0 | 0        | 0 | 0        | 0 | 0 | 0        | 0        | 0 |
| 0 | 0        | 0 | 0.000164 | 0 | 0 | 0        | 0        | 0 |
| 0 | 0        | 0 | 0        | 0 | 0 | 0        | 0        | 0 |
| 0 | 0        | 0 | 0        | 0 | 0 | 0        | 0        | 0 |
| 0 | 0        | 0 | 3.29E-05 | 0 | 0 | 0        | 0        | 0 |
| 0 | 0        | 0 | 0.002038 | 0 | 0 | 3.29E-05 | 0        | 0 |
| 0 | 0        | 0 | 0.000526 | 0 | 0 | 0        | 0        | 0 |
| 0 | 0        | 0 | 3.29E-05 | 0 | 0 | 0        | 0        | 0 |
| 0 | 0        | 0 | 0.000394 | 0 | 0 | 0        | 0        | 0 |
| 0 | 0        | 0 | 9.86E-05 | 0 | 0 | 0        | 0        | 0 |
| 0 | 0.001118 | 0 | 0        | 0 | 0 | 0        | 0        | 0 |
| 0 | 0.000329 | 0 | 0        | 0 | 0 | 0        | 0        | 0 |

|   |          |          |          |   |   |   |          |   |
|---|----------|----------|----------|---|---|---|----------|---|
| 0 | 0.000131 | 0        | 0.000131 | 0 | 0 | 0 | 0        | 0 |
| 0 | 0.000131 | 0        | 0.000164 | 0 | 0 | 0 | 0        | 0 |
| 0 | 0        | 0        | 0.000362 | 0 | 0 | 0 | 9.86E-05 | 0 |
| 0 | 0        | 0        | 3.29E-05 | 0 | 0 | 0 | 0        | 0 |
| 0 | 0        | 0        | 0        | 0 | 0 | 0 | 0        | 0 |
| 0 | 0        | 0        | 0        | 0 | 0 | 0 | 0        | 0 |
| 0 | 0        | 0        | 0        | 0 | 0 | 0 | 0        | 0 |
| 0 | 0        | 0        | 0        | 0 | 0 | 0 | 3.29E-05 | 0 |
| 0 | 0        | 0        | 0        | 0 | 0 | 0 | 0        | 0 |
| 0 | 0        | 0        | 0        | 0 | 0 | 0 | 0        | 0 |
| 0 | 0        | 0        | 0        | 0 | 0 | 0 | 0        | 0 |
| 0 | 0        | 0        | 0        | 0 | 0 | 0 | 0        | 0 |
| 0 | 0.000197 | 0        | 0        | 0 | 0 | 0 | 0        | 0 |
| 0 | 0        | 0        | 0        | 0 | 0 | 0 | 0        | 0 |
| 0 | 0        | 0        | 0        | 0 | 0 | 0 | 0        | 0 |
| 0 | 0        | 0        | 0        | 0 | 0 | 0 | 0        | 0 |
| 0 | 0        | 0        | 6.57E-05 | 0 | 0 | 0 | 0        | 0 |
| 0 | 0        | 0        | 9.86E-05 | 0 | 0 | 0 | 3.29E-05 | 0 |
| 0 | 0        | 3.29E-05 | 0        | 0 | 0 | 0 | 0        | 0 |
| 0 | 0        | 0        | 0.000164 | 0 | 0 | 0 | 0        | 0 |
| 0 | 0        | 0        | 0        | 0 | 0 | 0 | 0        | 0 |
| 0 | 0        | 0        | 0.001677 | 0 | 0 | 0 | 0        | 0 |
| 0 | 0        | 0        | 0        | 0 | 0 | 0 | 0        | 0 |
| 0 | 0        | 0        | 0        | 0 | 0 | 0 | 0        | 0 |
| 0 | 0        | 0        | 0        | 0 | 0 | 0 | 3.29E-05 | 0 |
| 0 | 0        | 0        | 0        | 0 | 0 | 0 | 0        | 0 |
| 0 | 0.000131 | 0        | 6.57E-05 | 0 | 0 | 0 | 0        | 0 |
| 0 | 0        | 0        | 0        | 0 | 0 | 0 | 0        | 0 |
| 0 | 0        | 0        | 0        | 0 | 0 | 0 | 0        | 0 |
| 0 | 0        | 0        | 0        | 0 | 0 | 0 | 0        | 0 |
| 0 | 0        | 0        | 0.000164 | 0 | 0 | 0 | 0        | 0 |
| 0 | 0        | 0        | 0        | 0 | 0 | 0 | 0        | 0 |
| 0 | 0        | 0        | 0        | 0 | 0 | 0 | 0        | 0 |
| 0 | 0        | 0        | 0        | 0 | 0 | 0 | 0        | 0 |
| 0 | 0        | 0        | 0        | 0 | 0 | 0 | 0        | 0 |
| 0 | 0        | 0        | 0.003222 | 0 | 0 | 0 | 0        | 0 |
| 0 | 0        | 0        | 0.001052 | 0 | 0 | 0 | 0        | 0 |
| 0 | 0        | 0        | 0        | 0 | 0 | 0 | 0        | 0 |
| 0 | 0        | 0        | 6.57E-05 | 0 | 0 | 0 | 0        | 0 |
| 0 | 0        | 0        | 0        | 0 | 0 | 0 | 0        | 0 |
| 0 | 0        | 0        | 0.001085 | 0 | 0 | 0 | 0        | 0 |
| 0 | 0        | 0        | 0.000888 | 0 | 0 | 0 | 0        | 0 |
| 0 | 0        | 0        | 0        | 0 | 0 | 0 | 0        | 0 |
| 0 | 0        | 0        | 0        | 0 | 0 | 0 | 0        | 0 |
| 0 | 0        | 0        | 9.86E-05 | 0 | 0 | 0 | 0        | 0 |

|          |          |   |          |   |   |   |          |   |
|----------|----------|---|----------|---|---|---|----------|---|
| 0        | 0        | 0 | 3.29E-05 | 0 | 0 | 0 | 0        | 0 |
| 0        | 0        | 0 | 0.000986 | 0 | 0 | 0 | 0        | 0 |
| 3.29E-05 | 0        | 0 | 9.86E-05 | 0 | 0 | 0 | 0        | 0 |
| 0        | 0        | 0 | 0        | 0 | 0 | 0 | 0        | 0 |
| 0        | 0        | 0 | 0        | 0 | 0 | 0 | 0        | 0 |
| 0        | 0        | 0 | 3.29E-05 | 0 | 0 | 0 | 0        | 0 |
| 0        | 0        | 0 | 0        | 0 | 0 | 0 | 0        | 0 |
| 0        | 0        | 0 | 0        | 0 | 0 | 0 | 0        | 0 |
| 0        | 0        | 0 | 0        | 0 | 0 | 0 | 0        | 0 |
| 0        | 0        | 0 | 0        | 0 | 0 | 0 | 0        | 0 |
| 0        | 0        | 0 | 6.57E-05 | 0 | 0 | 0 | 0        | 0 |
| 0        | 0        | 0 | 0        | 0 | 0 | 0 | 0        | 0 |
| 0        | 0        | 0 | 0        | 0 | 0 | 0 | 0        | 0 |
| 0        | 0        | 0 | 0        | 0 | 0 | 0 | 0        | 0 |
| 0        | 0        | 0 | 0        | 0 | 0 | 0 | 0        | 0 |
| 0        | 0        | 0 | 0        | 0 | 0 | 0 | 0        | 0 |
| 0        | 0        | 0 | 6.57E-05 | 0 | 0 | 0 | 0        | 0 |
| 0        | 0.002893 | 0 | 0        | 0 | 0 | 0 | 0        | 0 |
| 0        | 0.000953 | 0 | 0        | 0 | 0 | 0 | 0        | 0 |
| 0        | 0.000855 | 0 | 0        | 0 | 0 | 0 | 0        | 0 |
| 0        | 0.001709 | 0 | 3.29E-05 | 0 | 0 | 0 | 0.000329 | 0 |
| 0        | 3.29E-05 | 0 | 0        | 0 | 0 | 0 | 0        | 0 |
| 0        | 0.001545 | 0 | 0        | 0 | 0 | 0 | 6.57E-05 | 0 |
| 0        | 0        | 0 | 3.29E-05 | 0 | 0 | 0 | 0        | 0 |
| 0        | 0        | 0 | 0        | 0 | 0 | 0 | 0        | 0 |
| 0        | 0        | 0 | 0.001183 | 0 | 0 | 0 | 0        | 0 |
| 0        | 0        | 0 | 0.000362 | 0 | 0 | 0 | 0.000296 | 0 |
| 0        | 0        | 0 | 0.000131 | 0 | 0 | 0 | 0        | 0 |
| 0        | 0        | 0 | 0        | 0 | 0 | 0 | 0        | 0 |
| 0        | 0        | 0 | 0        | 0 | 0 | 0 | 0        | 0 |
| 0        | 0        | 0 | 0        | 0 | 0 | 0 | 0        | 0 |
| 0        | 0        | 0 | 0        | 0 | 0 | 0 | 0        | 0 |
| 0        | 3.29E-05 | 0 | 0        | 0 | 0 | 0 | 0        | 0 |
| 0        | 0        | 0 | 0        | 0 | 0 | 0 | 0        | 0 |
| 0        | 0        | 0 | 0        | 0 | 0 | 0 | 0        | 0 |
| 0        | 0        | 0 | 6.57E-05 | 0 | 0 | 0 | 0        | 0 |
| 0        | 3.29E-05 | 0 | 0        | 0 | 0 | 0 | 0        | 0 |
| 0        | 0        | 0 | 6.57E-05 | 0 | 0 | 0 | 0        | 0 |
| 0        | 0        | 0 | 0        | 0 | 0 | 0 | 0        | 0 |
| 0        | 6.57E-05 | 0 | 0        | 0 | 0 | 0 | 0        | 0 |
| 0        | 3.29E-05 | 0 | 0.002498 | 0 | 0 | 0 | 0        | 0 |
| 0        | 6.57E-05 | 0 | 0        | 0 | 0 | 0 | 0        | 0 |
| 0        | 0        | 0 | 0        | 0 | 0 | 0 | 0        | 0 |
| 0        | 3.29E-05 | 0 | 0.000394 | 0 | 0 | 0 | 0.001677 | 0 |
| 0        | 0        | 0 | 0.000493 | 0 | 0 | 0 | 0        | 0 |
| 0        | 0        | 0 | 0.002531 | 0 | 0 | 0 | 0        | 0 |
| 0        | 0        | 0 | 3.29E-05 | 0 | 0 | 0 | 0        | 0 |

|   |          |   |          |   |   |   |          |          |
|---|----------|---|----------|---|---|---|----------|----------|
| 0 | 0.000131 | 0 | 0        | 0 | 0 | 0 | 0        | 0        |
| 0 | 6.57E-05 | 0 | 0        | 0 | 0 | 0 | 0        | 0        |
| 0 | 0        | 0 | 6.57E-05 | 0 | 0 | 0 | 0        | 0        |
| 0 | 0.000427 | 0 | 0        | 0 | 0 | 0 | 0        | 0        |
| 0 | 0        | 0 | 0        | 0 | 0 | 0 | 0        | 0        |
| 0 | 0        | 0 | 0        | 0 | 0 | 0 | 0        | 0        |
| 0 | 0        | 0 | 0        | 0 | 0 | 0 | 0        | 0        |
| 0 | 0        | 0 | 0        | 0 | 0 | 0 | 0        | 0        |
| 0 | 0        | 0 | 0        | 0 | 0 | 0 | 0        | 0        |
| 0 | 0        | 0 | 0        | 0 | 0 | 0 | 0        | 0        |
| 0 | 0        | 0 | 3.29E-05 | 0 | 0 | 0 | 0        | 0        |
| 0 | 0        | 0 | 0        | 0 | 0 | 0 | 0        | 0        |
| 0 | 0.000164 | 0 | 0        | 0 | 0 | 0 | 0        | 0        |
| 0 | 0.000723 | 0 | 0        | 0 | 0 | 0 | 0        | 0        |
| 0 | 3.29E-05 | 0 | 0        | 0 | 0 | 0 | 0        | 0        |
| 0 | 0        | 0 | 0        | 0 | 0 | 0 | 0        | 0        |
| 0 | 0.000164 | 0 | 0.021072 | 0 | 0 | 0 | 0        | 0        |
| 0 | 9.86E-05 | 0 | 3.29E-05 | 0 | 0 | 0 | 0        | 0        |
| 0 | 0.000131 | 0 | 0        | 0 | 0 | 0 | 0        | 0        |
| 0 | 0        | 0 | 0        | 0 | 0 | 0 | 0        | 0        |
| 0 | 0        | 0 | 0        | 0 | 0 | 0 | 0        | 0        |
| 0 | 0.00023  | 0 | 0.000164 | 0 | 0 | 0 | 0        | 0        |
| 0 | 3.29E-05 | 0 | 3.29E-05 | 0 | 0 | 0 | 0        | 0        |
| 0 | 0        | 0 | 0        | 0 | 0 | 0 | 0        | 0        |
| 0 | 0.000427 | 0 | 0        | 0 | 0 | 0 | 0        | 0        |
| 0 | 6.57E-05 | 0 | 0        | 0 | 0 | 0 | 0        | 0        |
| 0 | 0.000131 | 0 | 0        | 0 | 0 | 0 | 0        | 0        |
| 0 | 6.57E-05 | 0 | 0        | 0 | 0 | 0 | 0        | 0        |
| 0 | 3.29E-05 | 0 | 0        | 0 | 0 | 0 | 0        | 0        |
| 0 | 3.29E-05 | 0 | 3.29E-05 | 0 | 0 | 0 | 0        | 0        |
| 0 | 0        | 0 | 0        | 0 | 0 | 0 | 0        | 0        |
| 0 | 0        | 0 | 0.000131 | 0 | 0 | 0 | 0        | 3.29E-05 |
| 0 | 0        | 0 | 6.57E-05 | 0 | 0 | 0 | 0        | 0        |
| 0 | 0        | 0 | 0        | 0 | 0 | 0 | 0        | 0        |
| 0 | 0        | 0 | 0        | 0 | 0 | 0 | 0        | 0        |
| 0 | 0        | 0 | 0        | 0 | 0 | 0 | 3.29E-05 | 0        |
| 0 | 0        | 0 | 6.57E-05 | 0 | 0 | 0 | 0        | 0        |
| 0 | 0        | 0 | 0        | 0 | 0 | 0 | 0        | 0        |
| 0 | 0        | 0 | 0        | 0 | 0 | 0 | 0        | 0        |
| 0 | 0        | 0 | 0        | 0 | 0 | 0 | 0        | 0        |
| 0 | 0        | 0 | 0.001019 | 0 | 0 | 0 | 0.000526 | 0        |
| 0 | 0        | 0 | 0        | 0 | 0 | 0 | 0        | 0        |
| 0 | 0        | 0 | 0        | 0 | 0 | 0 | 0        | 0        |
| 0 | 0        | 0 | 0        | 0 | 0 | 0 | 0        | 0        |
| 0 | 0        | 0 | 0        | 0 | 0 | 0 | 0        | 0        |
| 0 | 0.000263 | 0 | 6.57E-05 | 0 | 0 | 0 | 0        | 0        |
| 0 | 3.29E-05 | 0 | 0        | 0 | 0 | 0 | 0        | 0        |









| k_Bacteri |
|-----------|-----------|-----------|-----------|-----------|-----------|-----------|-----------|-----------|
| 0         | 0         | 0         | 0         | 0         | 0         | 3.29E-05  | 0         | 0         |
| 0         | 0         | 0         | 0         | 9.86E-05  | 0         | 0         | 0         | 0         |
| 0         | 0         | 0         | 0         | 0         | 0         | 0         | 0         | 0         |
| 0         | 0         | 0         | 0         | 0         | 0         | 3.29E-05  | 0         | 0         |
| 0         | 0         | 0         | 0         | 0.004438  | 0         | 3.29E-05  | 0         | 0         |
| 0         | 0         | 0         | 0         | 0         | 0         | 0         | 0         | 0         |
| 0         | 0         | 0         | 0         | 3.29E-05  | 0         | 0         | 0         | 0         |
| 0         | 0         | 0         | 0         | 0         | 0         | 0         | 0         | 0         |
| 0         | 0         | 0         | 0         | 0         | 0         | 0         | 0         | 0         |
| 0         | 0         | 0         | 0         | 0         | 0         | 6.57E-05  | 0         | 0         |
| 0         | 0         | 0         | 0         | 0         | 0         | 0         | 0         | 0         |
| 0         | 0         | 0         | 0         | 9.86E-05  | 0         | 0         | 0         | 0         |
| 0         | 0         | 0         | 0         | 0.000592  | 0         | 0         | 0         | 0         |
| 0         | 0         | 0         | 0         | 0         | 0         | 3.29E-05  | 0         | 0         |
| 0         | 0         | 0         | 0         | 3.29E-05  | 0         | 0.000164  | 0         | 0         |
| 0         | 0         | 0.000263  | 0         | 0.144679  | 0         | 0         | 0         | 0         |
| 0         | 0         | 3.29E-05  | 0         | 3.29E-05  | 0         | 0         | 0         | 0         |
| 0         | 0         | 3.29E-05  | 0         | 0.001151  | 0         | 3.29E-05  | 0         | 0         |
| 0         | 0         | 0         | 0         | 3.29E-05  | 0         | 6.57E-05  | 0         | 0         |
| 0         | 0         | 0         | 0         | 0.000296  | 0         | 0         | 0         | 0         |
| 0         | 0         | 0         | 0         | 0         | 0         | 0         | 0         | 0         |
| 0         | 0         | 0         | 0         | 0         | 0         | 0         | 0         | 0         |
| 0         | 0         | 0         | 0         | 0         | 0         | 0         | 0         | 0         |
| 0         | 0         | 0         | 0         | 0         | 0         | 0.000164  | 0         | 0         |
| 0         | 0         | 0         | 0         | 0         | 0         | 0         | 0         | 0         |
| 0         | 0         | 0         | 0         | 6.57E-05  | 0         | 0         | 0         | 0         |
| 0         | 0         | 0         | 0         | 6.57E-05  | 0         | 0         | 0         | 0         |
| 0         | 0         | 0         | 0         | 0.000164  | 0         | 0         | 0         | 0         |
| 0         | 0         | 0         | 0         | 0         | 0         | 0         | 0         | 0         |
| 0         | 0         | 0         | 0         | 0         | 0         | 0.001282  | 0         | 0         |
| 0         | 0         | 0         | 0         | 0         | 0         | 9.86E-05  | 0         | 0         |
| 0         | 0         | 0         | 0         | 0         | 0         | 0         | 0         | 0         |
| 0         | 0         | 0         | 0         | 0         | 0         | 0         | 0         | 0         |
| 0         | 0         | 0         | 0         | 0         | 0         | 3.29E-05  | 0         | 0         |
| 0         | 0         | 0         | 0         | 3.29E-05  | 0         | 9.86E-05  | 0         | 0         |
| 0         | 0         | 0         | 0         | 0.000427  | 0         | 0.010848  | 0         | 0         |
| 0         | 0         | 0         | 0         | 0         | 0         | 0         | 0         | 0         |
| 0         | 0         | 0         | 0         | 0         | 0         | 3.29E-05  | 0         | 0         |
| 0         | 0         | 0         | 0         | 0         | 0         | 0         | 0         | 0         |
| 0         | 0         | 0         | 0         | 0         | 0         | 0.000362  | 0         | 0         |
| 0         | 0         | 0         | 0         | 0.00092   | 0         | 0.00023   | 0         | 0         |
| 0         | 0         | 0         | 0         | 0         | 0         | 0.000296  | 0         | 0         |

|   |   |          |   |          |   |          |          |   |
|---|---|----------|---|----------|---|----------|----------|---|
| 0 | 0 | 0        | 0 | 0        | 0 | 0        | 0        | 0 |
| 0 | 0 | 0        | 0 | 0        | 0 | 0        | 0        | 0 |
| 0 | 0 | 0        | 0 | 0        | 0 | 3.29E-05 | 0        | 0 |
| 0 | 0 | 0        | 0 | 0        | 0 | 0        | 0        | 0 |
| 0 | 0 | 0        | 0 | 0        | 0 | 0        | 0        | 0 |
| 0 | 0 | 0        | 0 | 3.29E-05 | 0 | 0        | 0        | 0 |
| 0 | 0 | 0        | 0 | 0.000164 | 0 | 3.29E-05 | 0        | 0 |
| 0 | 0 | 0        | 0 | 0        | 0 | 0        | 0        | 0 |
| 0 | 0 | 0        | 0 | 0        | 0 | 9.86E-05 | 0        | 0 |
| 0 | 0 | 0        | 0 | 0.00023  | 0 | 0        | 0        | 0 |
| 0 | 0 | 0        | 0 | 0.00046  | 0 | 0        | 0        | 0 |
| 0 | 0 | 0        | 0 | 3.29E-05 | 0 | 0        | 0        | 0 |
| 0 | 0 | 0        | 0 | 0        | 0 | 0.00046  | 0        | 0 |
| 0 | 0 | 0        | 0 | 0        | 0 | 3.29E-05 | 0        | 0 |
| 0 | 0 | 0        | 0 | 0        | 0 | 6.57E-05 | 0        | 0 |
| 0 | 0 | 0        | 0 | 0.002334 | 0 | 0.007199 | 0.000855 | 0 |
| 0 | 0 | 0        | 0 | 0        | 0 | 6.57E-05 | 0        | 0 |
| 0 | 0 | 0        | 0 | 0        | 0 | 0        | 0        | 0 |
| 0 | 0 | 0        | 0 | 3.29E-05 | 0 | 0        | 0        | 0 |
| 0 | 0 | 0        | 0 | 0        | 0 | 6.57E-05 | 0        | 0 |
| 0 | 0 | 0        | 0 | 0        | 0 | 0        | 0        | 0 |
| 0 | 0 | 0        | 0 | 0        | 0 | 0        | 0        | 0 |
| 0 | 0 | 0        | 0 | 0        | 0 | 0        | 0        | 0 |
| 0 | 0 | 0.000526 | 0 | 0.490746 | 0 | 6.57E-05 | 0        | 0 |
| 0 | 0 | 0        | 0 | 0.000197 | 0 | 0        | 0        | 0 |
| 0 | 0 | 0        | 0 | 0        | 0 | 0        | 0        | 0 |
| 0 | 0 | 0        | 0 | 0        | 0 | 0.000394 | 0        | 0 |
| 0 | 0 | 0        | 0 | 0        | 0 | 0        | 0        | 0 |
| 0 | 0 | 0        | 0 | 0.000855 | 0 | 0.010421 | 0        | 0 |
| 0 | 0 | 0        | 0 | 0        | 0 | 0        | 0        | 0 |
| 0 | 0 | 0        | 0 | 0        | 0 | 0        | 0        | 0 |
| 0 | 0 | 0        | 0 | 0.000164 | 0 | 0        | 0        | 0 |
| 0 | 0 | 0        | 0 | 0.00023  | 0 | 0        | 0        | 0 |
| 0 | 0 | 0        | 0 | 0        | 0 | 0        | 0        | 0 |
| 0 | 0 | 0        | 0 | 6.57E-05 | 0 | 0        | 0        | 0 |
| 0 | 0 | 0        | 0 | 0        | 0 | 0        | 0        | 0 |
| 0 | 0 | 0        | 0 | 0.001611 | 0 | 0.034354 | 0        | 0 |
| 0 | 0 | 0        | 0 | 0.003057 | 0 | 0        | 0        | 0 |
| 0 | 0 | 3.29E-05 | 0 | 0.01006  | 0 | 0.01052  | 0        | 0 |
| 0 | 0 | 0        | 0 | 0.001611 | 0 | 0.035208 | 0        | 0 |
| 0 | 0 | 0        | 0 | 3.29E-05 | 0 | 6.57E-05 | 0        | 0 |
| 0 | 0 | 0        | 0 | 0        | 0 | 0        | 0        | 0 |
| 0 | 0 | 0        | 0 | 0        | 0 | 0.000131 | 0        | 0 |
| 0 | 0 | 3.29E-05 | 0 | 6.57E-05 | 0 | 0.001414 | 0        | 0 |
| 0 | 0 | 0        | 0 | 6.57E-05 | 0 | 0        | 0        | 0 |
| 0 | 0 | 0        | 0 | 0.001216 | 0 | 0.015878 | 3.29E-05 | 0 |
| 0 | 0 | 0        | 0 | 6.57E-05 | 0 | 3.29E-05 | 0        | 0 |

|   |   |   |          |          |   |          |          |   |
|---|---|---|----------|----------|---|----------|----------|---|
| 0 | 0 | 0 | 0        | 0        | 0 | 0        | 0        | 0 |
| 0 | 0 | 0 | 0        | 9.86E-05 | 0 | 0        | 0        | 0 |
| 0 | 0 | 0 | 0        | 0.000131 | 0 | 0        | 0        | 0 |
| 0 | 0 | 0 | 0        | 6.57E-05 | 0 | 6.57E-05 | 0        | 0 |
| 0 | 0 | 0 | 0        | 3.29E-05 | 0 | 0        | 0        | 0 |
| 0 | 0 | 0 | 0        | 0        | 0 | 3.29E-05 | 0        | 0 |
| 0 | 0 | 0 | 0        | 0        | 0 | 3.29E-05 | 0        | 0 |
| 0 | 0 | 0 | 0        | 3.29E-05 | 0 | 0        | 0        | 0 |
| 0 | 0 | 0 | 0        | 0        | 0 | 0        | 0        | 0 |
| 0 | 0 | 0 | 0        | 0        | 0 | 0        | 0        | 0 |
| 0 | 0 | 0 | 0        | 0        | 0 | 3.29E-05 | 0        | 0 |
| 0 | 0 | 0 | 0        | 0        | 0 | 0        | 0        | 0 |
| 0 | 0 | 0 | 0        | 7.02E-05 | 0 | 0        | 0        | 0 |
| 0 | 0 | 0 | 0        | 0.000394 | 0 | 3.29E-05 | 3.29E-05 | 0 |
| 0 | 0 | 0 | 0        | 0        | 0 | 0        | 0        | 0 |
| 0 | 0 | 0 | 0        | 0        | 0 | 6.57E-05 | 0        | 0 |
| 0 | 0 | 0 | 0        | 0.000953 | 0 | 0        | 0        | 0 |
| 0 | 0 | 0 | 0        | 3.29E-05 | 0 | 0.517177 | 0        | 0 |
| 0 | 0 | 0 | 0        | 0        | 0 | 0.939281 | 0        | 0 |
| 0 | 0 | 0 | 3.29E-05 | 0        | 0 | 0.867944 | 0        | 0 |
| 0 | 0 | 0 | 0        | 0.000164 | 0 | 0.000263 | 0        | 0 |
| 0 | 0 | 0 | 0        | 0        | 0 | 0        | 0        | 0 |
| 0 | 0 | 0 | 0        | 0        | 0 | 0        | 0        | 0 |
| 0 | 0 | 0 | 0        | 0        | 0 | 0        | 0        | 0 |
| 0 | 0 | 0 | 0        | 0        | 0 | 0        | 0        | 0 |
| 0 | 0 | 0 | 0        | 0        | 0 | 0        | 0        | 0 |
| 0 | 0 | 0 | 0        | 0        | 0 | 0        | 0        | 0 |
| 0 | 0 | 0 | 0        | 0        | 0 | 0        | 0        | 0 |
| 0 | 0 | 0 | 0        | 0        | 0 | 0        | 0        | 0 |
| 0 | 0 | 0 | 0        | 0        | 0 | 0        | 0        | 0 |
| 0 | 0 | 0 | 0        | 0        | 0 | 0        | 0        | 0 |
| 0 | 0 | 0 | 0        | 0        | 0 | 0        | 0        | 0 |
| 0 | 0 | 0 | 0        | 0        | 0 | 0        | 0        | 0 |
| 0 | 0 | 0 | 0        | 0        | 0 | 0        | 0        | 0 |
| 0 | 0 | 0 | 0        | 0        | 0 | 0        | 0        | 0 |
| 0 | 0 | 0 | 0        | 0        | 0 | 0        | 0        | 0 |
| 0 | 0 | 0 | 0        | 0        | 0 | 0        | 0        | 0 |
| 0 | 0 | 0 | 0        | 6.57E-05 | 0 | 0        | 0        | 0 |
| 0 | 0 | 0 | 0        | 0        | 0 | 0        | 0        | 0 |
| 0 | 0 | 0 | 0        | 3.29E-05 | 0 | 0.000559 | 0        | 0 |
| 0 | 0 | 0 | 0        | 0        | 0 | 0        | 0        | 0 |
| 0 | 0 | 0 | 0        | 3.29E-05 | 0 | 0        | 0        | 0 |
| 0 | 0 | 0 | 0        | 0        | 0 | 3.29E-05 | 0        | 0 |
| 0 | 0 | 0 | 0        | 0        | 0 | 3.29E-05 | 0        | 0 |
| 0 | 0 | 0 | 0        | 0        | 0 | 0        | 0        | 0 |
| 0 | 0 | 0 | 0        | 0        | 0 | 0.000131 | 0        | 0 |
| 0 | 0 | 0 | 0        | 0.000164 | 0 | 0        | 0        | 0 |
| 0 | 0 | 0 | 0        | 3.29E-05 | 0 | 0        | 0        | 0 |
| 0 | 0 | 0 | 0        | 0        | 0 | 0        | 0        | 0 |
| 0 | 0 | 0 | 0        | 0        | 0 | 0        | 0        | 0 |
| 0 | 0 | 0 | 0        | 0        | 0 | 0        | 0        | 0 |
| 0 | 0 | 0 | 0        | 0        | 0 | 0        | 0        | 0 |
| 0 | 0 | 0 | 0        | 0.000263 | 0 | 0        | 0        | 0 |



|   |   |   |   |          |   |          |   |   |
|---|---|---|---|----------|---|----------|---|---|
| 0 | 0 | 0 | 0 | 3.29E-05 | 0 | 0        | 0 | 0 |
| 0 | 0 | 0 | 0 | 0        | 0 | 0        | 0 | 0 |
| 0 | 0 | 0 | 0 | 0        | 0 | 3.29E-05 | 0 | 0 |
| 0 | 0 | 0 | 0 | 0        | 0 | 0        | 0 | 0 |
| 0 | 0 | 0 | 0 | 0        | 0 | 3.29E-05 | 0 | 0 |
| 0 | 0 | 0 | 0 | 0        | 0 | 0        | 0 | 0 |
| 0 | 0 | 0 | 0 | 0        | 0 | 0        | 0 | 0 |
| 0 | 0 | 0 | 0 | 0        | 0 | 0        | 0 | 0 |
| 0 | 0 | 0 | 0 | 0        | 0 | 0        | 0 | 0 |
| 0 | 0 | 0 | 0 | 0.000131 | 0 | 3.29E-05 | 0 | 0 |
| 0 | 0 | 0 | 0 | 0        | 0 | 0        | 0 | 0 |
| 0 | 0 | 0 | 0 | 0        | 0 | 0        | 0 | 0 |
| 0 | 0 | 0 | 0 | 0        | 0 | 0.000197 | 0 | 0 |
| 0 | 0 | 0 | 0 | 0        | 0 | 0        | 0 | 0 |
| 0 | 0 | 0 | 0 | 0        | 0 | 0        | 0 | 0 |
| 0 | 0 | 0 | 0 | 0        | 0 | 0        | 0 | 0 |
| 0 | 0 | 0 | 0 | 6.57E-05 | 0 | 0        | 0 | 0 |
| 0 | 0 | 0 | 0 | 0.000263 | 0 | 0        | 0 | 0 |
| 0 | 0 | 0 | 0 | 0.000362 | 0 | 0        | 0 | 0 |
| 0 | 0 | 0 | 0 | 9.86E-05 | 0 | 6.57E-05 | 0 | 0 |
| 0 | 0 | 0 | 0 | 0        | 0 | 0        | 0 | 0 |
| 0 | 0 | 0 | 0 | 0        | 0 | 0        | 0 | 0 |
| 0 | 0 | 0 | 0 | 0        | 0 | 0        | 0 | 0 |
| 0 | 0 | 0 | 0 | 0        | 0 | 3.29E-05 | 0 | 0 |
| 0 | 0 | 0 | 0 | 3.29E-05 | 0 | 0        | 0 | 0 |
| 0 | 0 | 0 | 0 | 0.000559 | 0 | 0.000986 | 0 | 0 |
| 0 | 0 | 0 | 0 | 0.002038 | 0 | 0.006476 | 0 | 0 |
| 0 | 0 | 0 | 0 | 9.86E-05 | 0 | 0.004405 | 0 | 0 |
| 0 | 0 | 0 | 0 | 0        | 0 | 0        | 0 | 0 |
| 0 | 0 | 0 | 0 | 0        | 0 | 0        | 0 | 0 |
| 0 | 0 | 0 | 0 | 0.001216 | 0 | 0.001709 | 0 | 0 |
| 0 | 0 | 0 | 0 | 0        | 0 | 0        | 0 | 0 |
| 0 | 0 | 0 | 0 | 6.57E-05 | 0 | 0        | 0 | 0 |
| 0 | 0 | 0 | 0 | 0        | 0 | 3.29E-05 | 0 | 0 |
| 0 | 0 | 0 | 0 | 0        | 0 | 0        | 0 | 0 |
| 0 | 0 | 0 | 0 | 0        | 0 | 0        | 0 | 0 |
| 0 | 0 | 0 | 0 | 0        | 0 | 6.57E-05 | 0 | 0 |
| 0 | 0 | 0 | 0 | 0        | 0 | 3.29E-05 | 0 | 0 |
| 0 | 0 | 0 | 0 | 0        | 0 | 0        | 0 | 0 |
| 0 | 0 | 0 | 0 | 6.57E-05 | 0 | 0        | 0 | 0 |
| 0 | 0 | 0 | 0 | 0        | 0 | 0        | 0 | 0 |
| 0 | 0 | 0 | 0 | 0        | 0 | 0        | 0 | 0 |
| 0 | 0 | 0 | 0 | 0        | 0 | 0        | 0 | 0 |
| 0 | 0 | 0 | 0 | 0        | 0 | 0        | 0 | 0 |
| 0 | 0 | 0 | 0 | 0        | 0 | 0        | 0 | 0 |
| 0 | 0 | 0 | 0 | 3.29E-05 | 0 | 0.001709 | 0 | 0 |
| 0 | 0 | 0 | 0 | 0        | 0 | 0        | 0 | 0 |
| 0 | 0 | 0 | 0 | 0        | 0 | 0.000329 | 0 | 0 |
| 0 | 0 | 0 | 0 | 3.29E-05 | 0 | 0        | 0 | 0 |







|   |   |          |   |          |   |          |   |   |
|---|---|----------|---|----------|---|----------|---|---|
| 0 | 0 | 0        | 0 | 0.000296 | 0 | 0.000493 | 0 | 0 |
| 0 | 0 | 0        | 0 | 9.86E-05 | 0 | 0        | 0 | 0 |
| 0 | 0 | 0        | 0 | 0        | 0 | 0        | 0 | 0 |
| 0 | 0 | 0        | 0 | 0        | 0 | 0        | 0 | 0 |
| 0 | 0 | 0        | 0 | 0        | 0 | 0.001216 | 0 | 0 |
| 0 | 0 | 0        | 0 | 0        | 0 | 0.000131 | 0 | 0 |
| 0 | 0 | 0        | 0 | 3.29E-05 | 0 | 0        | 0 | 0 |
| 0 | 0 | 0        | 0 | 6.57E-05 | 0 | 0        | 0 | 0 |
| 0 | 0 | 0        | 0 | 0        | 0 | 0        | 0 | 0 |
| 0 | 0 | 0        | 0 | 0        | 0 | 3.29E-05 | 0 | 0 |
| 0 | 0 | 0        | 0 | 0        | 0 | 0        | 0 | 0 |
| 0 | 0 | 0        | 0 | 0        | 0 | 3.29E-05 | 0 | 0 |
| 0 | 0 | 0        | 0 | 3.29E-05 | 0 | 3.29E-05 | 0 | 0 |
| 0 | 0 | 0        | 0 | 0        | 0 | 0        | 0 | 0 |
| 0 | 0 | 0        | 0 | 0        | 0 | 0        | 0 | 0 |
| 0 | 0 | 0        | 0 | 0        | 0 | 0        | 0 | 0 |
| 0 | 0 | 0        | 0 | 9.86E-05 | 0 | 6.57E-05 | 0 | 0 |
| 0 | 0 | 0        | 0 | 0        | 0 | 3.29E-05 | 0 | 0 |
| 0 | 0 | 0        | 0 | 0.000164 | 0 | 0.000329 | 0 | 0 |
| 0 | 0 | 0        | 0 | 0        | 0 | 0        | 0 | 0 |
| 0 | 0 | 0        | 0 | 0        | 0 | 0        | 0 | 0 |
| 0 | 0 | 3.29E-05 | 0 | 0.000493 | 0 | 0        | 0 | 0 |
| 0 | 0 | 0        | 0 | 0        | 0 | 0        | 0 | 0 |
| 0 | 0 | 0        | 0 | 0        | 0 | 0        | 0 | 0 |
| 0 | 0 | 0        | 0 | 6.57E-05 | 0 | 0        | 0 | 0 |
| 0 | 0 | 0        | 0 | 6.57E-05 | 0 | 0        | 0 | 0 |
| 0 | 0 | 0        | 0 | 0        | 0 | 3.29E-05 | 0 | 0 |
| 0 | 0 | 0        | 0 | 0        | 0 | 0        | 0 | 0 |
| 0 | 0 | 0        | 0 | 3.29E-05 | 0 | 3.29E-05 | 0 | 0 |
| 0 | 0 | 0        | 0 | 0        | 0 | 0        | 0 | 0 |
| 0 | 0 | 0        | 0 | 0.000855 | 0 | 0        | 0 | 0 |
| 0 | 0 | 0        | 0 | 0        | 0 | 0        | 0 | 0 |
| 0 | 0 | 0        | 0 | 0        | 0 | 0        | 0 | 0 |
| 0 | 0 | 0        | 0 | 0        | 0 | 0        | 0 | 0 |
| 0 | 0 | 0        | 0 | 0        | 0 | 0        | 0 | 0 |
| 0 | 0 | 0        | 0 | 0        | 0 | 0.004898 | 0 | 0 |
| 0 | 0 | 0        | 0 | 0.001808 | 0 | 0.008021 | 0 | 0 |
| 0 | 0 | 0        | 0 | 0.000592 | 0 | 0.002268 | 0 | 0 |
| 0 | 0 | 0        | 0 | 0        | 0 | 3.29E-05 | 0 | 0 |
| 0 | 0 | 0        | 0 | 0        | 0 | 0        | 0 | 0 |
| 0 | 0 | 0        | 0 | 0        | 0 | 0.000657 | 0 | 0 |
| 0 | 0 | 0        | 0 | 0.000822 | 0 | 0.003978 | 0 | 0 |
| 0 | 0 | 0        | 0 | 0.00092  | 0 | 0.002334 | 0 | 0 |
| 0 | 0 | 0        | 0 | 0        | 0 | 0        | 0 | 0 |
| 0 | 0 | 0        | 0 | 0        | 0 | 3.29E-05 | 0 | 0 |
| 0 | 0 | 0        | 0 | 0.000197 | 0 | 0        | 0 | 0 |





|   |   |          |   |          |   |          |          |   |
|---|---|----------|---|----------|---|----------|----------|---|
| 0 | 0 | 0        | 0 | 0        | 0 | 0        | 0        | 0 |
| 0 | 0 | 0        | 0 | 0.013018 | 0 | 3.29E-05 | 3.29E-05 | 0 |
| 0 | 0 | 0        | 0 | 0        | 0 | 0        | 0        | 0 |
| 0 | 0 | 0        | 0 | 0        | 0 | 0.000362 | 0        | 0 |
| 0 | 0 | 0        | 0 | 0        | 0 | 0        | 0        | 0 |
| 0 | 0 | 0        | 0 | 0        | 0 | 0        | 0        | 0 |
| 0 | 0 | 0        | 0 | 0        | 0 | 0        | 0        | 0 |
| 0 | 0 | 0        | 0 | 0.003123 | 0 | 0        | 0        | 0 |
| 0 | 0 | 0        | 0 | 3.29E-05 | 0 | 6.57E-05 | 0        | 0 |
| 0 | 0 | 0        | 0 | 0.000296 | 0 | 0.010322 | 0        | 0 |
| 0 | 0 | 0        | 0 | 3.29E-05 | 0 | 0        | 0        | 0 |
| 0 | 0 | 0        | 0 | 6.57E-05 | 0 | 0        | 0        | 0 |
| 0 | 0 | 0        | 0 | 0        | 0 | 0.000888 | 0        | 0 |
| 0 | 0 | 0        | 0 | 0        | 0 | 3.29E-05 | 3.29E-05 | 0 |
| 0 | 0 | 0        | 0 | 0        | 0 | 0.000427 | 0        | 0 |
| 0 | 0 | 0        | 0 | 0        | 0 | 0.000131 | 0        | 0 |
| 0 | 0 | 0        | 0 | 3.29E-05 | 0 | 0        | 0        | 0 |
| 0 | 0 | 3.29E-05 | 0 | 0.001611 | 0 | 0        | 0        | 0 |
| 0 | 0 | 0        | 0 | 9.86E-05 | 0 | 0        | 0        | 0 |
| 0 | 0 | 0        | 0 | 3.29E-05 | 0 | 0        | 0        | 0 |
| 0 | 0 | 0        | 0 | 0        | 0 | 0.000362 | 0        | 0 |
| 0 | 0 | 0        | 0 | 0        | 0 | 0        | 0        | 0 |
| 0 | 0 | 0        | 0 | 0        | 0 | 0        | 0        | 0 |
| 0 | 0 | 0        | 0 | 0        | 0 | 0        | 0        | 0 |
| 0 | 0 | 0        | 0 | 0        | 0 | 0.000263 | 0        | 0 |
| 0 | 0 | 0        | 0 | 0        | 0 | 0        | 0        | 0 |
| 0 | 0 | 0        | 0 | 0        | 0 | 0        | 0        | 0 |
| 0 | 0 | 0        | 0 | 0        | 0 | 0        | 0        | 0 |
| 0 | 0 | 0        | 0 | 0.000493 | 0 | 0        | 0        | 0 |
| 0 | 0 | 0        | 0 | 0        | 0 | 0        | 0        | 0 |
| 0 | 0 | 0        | 0 | 0        | 0 | 0        | 0        | 0 |
| 0 | 0 | 0        | 0 | 0        | 0 | 3.29E-05 | 0        | 0 |
| 0 | 0 | 0        | 0 | 0        | 0 | 0        | 0        | 0 |
| 0 | 0 | 0        | 0 | 0        | 0 | 0        | 0        | 0 |
| 0 | 0 | 0        | 0 | 0.004142 | 0 | 0.007199 | 0        | 0 |
| 0 | 0 | 0        | 0 | 0.000559 | 0 | 0.000526 | 0        | 0 |
| 0 | 0 | 0        | 0 | 0        | 0 | 0        | 0        | 0 |
| 0 | 0 | 0        | 0 | 0        | 0 | 6.57E-05 | 0        | 0 |
| 0 | 0 | 0        | 0 | 0        | 0 | 0.000789 | 0        | 0 |
| 0 | 0 | 0        | 0 | 0.000592 | 0 | 0.005786 | 0        | 0 |
| 0 | 0 | 0        | 0 | 0.000164 | 0 | 6.57E-05 | 0        | 0 |
| 0 | 0 | 0        | 0 | 3.29E-05 | 0 | 0        | 0        | 0 |
| 0 | 0 | 0        | 0 | 0.003255 | 0 | 0        | 0        | 0 |
| 0 | 0 | 0        | 0 | 6.57E-05 | 0 | 0        | 0        | 0 |



































| k_Bacteri |
|-----------|-----------|-----------|-----------|-----------|-----------|-----------|-----------|-----------|
| 0         | 0         | 0         | 0         | 0         | 0         | 0         | 0.004438  | 0         |
| 0         | 0         | 0         | 3.29E-05  | 0         | 0         | 0         | 0.009336  | 0         |
| 0         | 0         | 0         | 0         | 0         | 0         | 0         | 0.003748  | 0         |
| 0         | 0         | 0         | 0         | 3.29E-05  | 0         | 0         | 0.003485  | 0         |
| 0         | 0         | 0         | 0         | 3.29E-05  | 0         | 0         | 0.002794  | 0         |
| 0         | 0         | 0         | 0         | 0         | 0         | 0         | 0.001446  | 0         |
| 0         | 0         | 0         | 0         | 0         | 3.29E-05  | 0         | 0.001742  | 0         |
| 0         | 0         | 0         | 0         | 0         | 0         | 0         | 0.002071  | 0         |
| 0         | 0         | 0         | 0         | 0.000296  | 0.000197  | 0         | 0.041849  | 0         |
| 0         | 0         | 0         | 0         | 0         | 0         | 0         | 0.002761  | 0         |
| 0         | 0         | 0         | 0         | 0         | 0         | 0         | 0.000723  | 0         |
| 0         | 0         | 0         | 0         | 0         | 0         | 0         | 0.000362  | 0         |
| 0         | 0         | 0         | 0         | 0         | 0         | 0         | 0.008416  | 0         |
| 0         | 0         | 0         | 0         | 0         | 0         | 0         | 0.001348  | 0         |
| 0         | 0         | 0         | 0         | 0         | 0         | 0         | 0.000657  | 0         |
| 0         | 0         | 0         | 0         | 0         | 0.000197  | 0         | 0.853545  | 0         |
| 0         | 0         | 0         | 0         | 0         | 0         | 0         | 0.000131  | 0         |
| 0         | 0         | 0         | 0         | 0         | 0.000164  | 0         | 0.814524  | 0         |
| 0         | 0         | 0         | 0         | 0         | 9.86E-05  | 0         | 0.931161  | 0         |
| 0         | 0         | 0         | 0         | 3.29E-05  | 0.00023   | 0         | 0.970578  | 0         |
| 0         | 0         | 0         | 0         | 0         | 3.29E-05  | 0         | 0.003123  | 0         |
| 0         | 0         | 0         | 0         | 0         | 3.29E-05  | 0         | 0.007167  | 0         |
| 0         | 0         | 0         | 0         | 0         | 0         | 0         | 0.003452  | 0         |
| 0         | 0         | 0         | 0         | 0         | 3.29E-05  | 0         | 0.010355  | 0         |
| 0         | 0         | 0         | 6.57E-05  | 0         | 0         | 0         | 0.029653  | 0         |
| 0         | 0         | 0         | 0         | 0         | 6.57E-05  | 0         | 0.687597  | 0         |
| 0         | 0         | 0         | 0         | 0         | 0         | 0         | 0.007068  | 0         |
| 0         | 0         | 0         | 0         | 0         | 0         | 0         | 0.00526   | 0         |
| 0         | 0         | 0         | 0         | 0         | 0         | 0         | 0.002893  | 0         |
| 0         | 0         | 0         | 0         | 6.57E-05  | 0         | 0         | 0.016338  | 0         |
| 0         | 0         | 0         | 0         | 3.29E-05  | 0         | 0         | 0.004044  | 0         |
| 0         | 0         | 0         | 9.86E-05  | 9.86E-05  | 0         | 0         | 0.029981  | 0         |
| 0         | 0         | 0         | 0         | 6.57E-05  | 0         | 0         | 0.005884  | 0         |
| 0         | 0         | 0         | 0         | 3.29E-05  | 6.57E-05  | 0         | 0.005753  | 0         |
| 0         | 0         | 0         | 0         | 6.57E-05  | 0         | 0         | 0.006443  | 0         |
| 0         | 0         | 0         | 0         | 0         | 0         | 0         | 0.000888  | 0         |
| 0         | 0         | 0         | 0         | 0         | 0.004142  | 0         | 0.017522  | 0         |
| 0         | 0         | 0         | 0         | 0.001578  | 0.00194   | 0         | 0.122654  | 0         |
| 0         | 0         | 0         | 3.29E-05  | 0         | 0.000131  | 0         | 0.003518  | 0         |
| 0         | 0         | 0         | 0         | 3.29E-05  | 0.001381  | 0         | 0.016766  | 0         |
| 0         | 0         | 0         | 0         | 0.009336  | 0.001841  | 0         | 0.135047  | 0         |
| 0         | 0         | 0         | 3.29E-05  | 0         | 0.000263  | 0         | 0.205036  | 0         |
| 0         | 0         | 0         | 0         | 0         | 0.001249  | 0         | 0.114271  | 0         |
| 0         | 0         | 0         | 6.57E-05  | 3.29E-05  | 0         | 0         | 0.020513  | 0         |



|   |          |   |          |          |          |   |          |   |
|---|----------|---|----------|----------|----------|---|----------|---|
| 0 | 0        | 0 | 0        | 0        | 0        | 0 | 0.000131 | 0 |
| 0 | 0        | 0 | 0        | 0        | 0        | 0 | 0.000263 | 0 |
| 0 | 0        | 0 | 0        | 0        | 0        | 0 | 0.00023  | 0 |
| 0 | 0        | 0 | 0        | 0.000197 | 0.001085 | 0 | 0.090601 | 0 |
| 0 | 0        | 0 | 0        | 0        | 0        | 0 | 0.000164 | 0 |
| 0 | 0        | 0 | 3.29E-05 | 6.57E-05 | 6.57E-05 | 0 | 0.310891 | 0 |
| 0 | 0        | 0 | 0        | 0.004504 | 0        | 0 | 0.022322 | 0 |
| 0 | 0        | 0 | 0        | 0.003846 | 0        | 0 | 0.067326 | 0 |
| 0 | 0        | 0 | 0        | 0.076268 | 3.29E-05 | 0 | 0.090766 | 0 |
| 0 | 0        | 0 | 0        | 0.001249 | 0        | 0 | 0.16036  | 0 |
| 0 | 0        | 0 | 0        | 0.001348 | 0.00046  | 0 | 0.025477 | 0 |
| 0 | 0        | 0 | 0        | 0.062987 | 0.000131 | 0 | 0.45968  | 0 |
| 0 | 0        | 0 | 0        | 0        | 7.02E-05 | 0 | 0.318843 | 0 |
| 0 | 0        | 0 | 6.57E-05 | 0.000362 | 3.29E-05 | 0 | 0.028929 | 0 |
| 0 | 0        | 0 | 9.86E-05 | 0        | 0        | 0 | 0.661067 | 0 |
| 0 | 0        | 0 | 3.29E-05 | 0        | 0.000131 | 0 | 0.727835 | 0 |
| 0 | 0        | 0 | 6.57E-05 | 0        | 3.29E-05 | 0 | 0.598376 | 0 |
| 0 | 0        | 0 | 6.57E-05 | 3.29E-05 | 0        | 0 | 0.001841 | 0 |
| 0 | 0        | 0 | 0        | 0        | 0        | 0 | 0.000362 | 0 |
| 0 | 0        | 0 | 0        | 0        | 0        | 0 | 0.000427 | 0 |
| 0 | 0        | 0 | 0        | 0        | 0        | 0 | 0.005621 | 0 |
| 0 | 0        | 0 | 6.57E-05 | 0        | 0.001709 | 0 | 0.024294 | 0 |
| 0 | 0        | 0 | 0        | 0        | 0.000657 | 0 | 0.055229 | 0 |
| 0 | 0        | 0 | 3.29E-05 | 0        | 0.000493 | 0 | 0.021565 | 0 |
| 0 | 0        | 0 | 0        | 0        | 0.000526 | 0 | 0.060752 | 0 |
| 0 | 0        | 0 | 3.29E-05 | 0        | 0.001644 | 0 | 0.026464 | 0 |
| 0 | 0        | 0 | 0        | 0        | 6.57E-05 | 0 | 0.740721 | 0 |
| 0 | 0        | 0 | 0        | 0        | 0.000131 | 0 | 0.092475 | 0 |
| 0 | 0        | 0 | 0        | 0        | 3.29E-05 | 0 | 0.960156 | 0 |
| 0 | 0        | 0 | 0        | 0        | 0.00023  | 0 | 0.662086 | 0 |
| 0 | 0        | 0 | 0        | 0        | 0.000131 | 0 | 0.756139 | 0 |
| 0 | 0        | 0 | 3.29E-05 | 3.29E-05 | 0.000526 | 0 | 0.03294  | 0 |
| 0 | 0        | 0 | 0        | 0        | 0        | 0 | 0.031756 | 0 |
| 0 | 0        | 0 | 0        | 0        | 0.00286  | 0 | 0.01384  | 0 |
| 0 | 0        | 0 | 0        | 0.013939 | 0.008449 | 0 | 0.020612 | 0 |
| 0 | 0        | 0 | 0        | 0.013544 | 0.001709 | 0 | 0.001972 | 0 |
| 0 | 0        | 0 | 3.29E-05 | 0        | 9.86E-05 | 0 | 0.010191 | 0 |
| 0 | 0        | 0 | 0        | 0        | 0.000822 | 0 | 0.767579 | 0 |
| 0 | 0        | 0 | 0        | 0        | 0.003715 | 0 | 0.125645 | 0 |
| 0 | 0        | 0 | 3.29E-05 | 0        | 0.000789 | 0 | 0.300371 | 0 |
| 0 | 3.29E-05 | 0 | 6.57E-05 | 0.022289 | 0.034058 | 0 | 0.037312 | 0 |
| 0 | 0        | 0 | 9.86E-05 | 0.032019 | 0.024163 | 0 | 0.035537 | 0 |
| 0 | 0        | 0 | 0        | 0.013183 | 0.00503  | 0 | 0.011342 | 0 |
| 0 | 0        | 0 | 0        | 0        | 0.000394 | 0 | 0.003715 | 0 |
| 0 | 0        | 0 | 0        | 3.29E-05 | 0.001052 | 0 | 0.019396 | 0 |
| 0 | 0        | 0 | 0        | 0        | 0.000362 | 0 | 0.006838 | 0 |
| 0 | 0        | 0 | 0        | 0        | 0.001775 | 0 | 0.014892 | 0 |



|   |   |   |          |          |          |   |          |   |
|---|---|---|----------|----------|----------|---|----------|---|
| 0 | 0 | 0 | 0        | 0        | 0.001775 | 0 | 0.003485 | 0 |
| 0 | 0 | 0 | 0        | 0        | 0        | 0 | 0.011703 | 0 |
| 0 | 0 | 0 | 3.29E-05 | 0        | 3.29E-05 | 0 | 0.015418 | 0 |
| 0 | 0 | 0 | 3.29E-05 | 0        | 0        | 0 | 0.006772 | 0 |
| 0 | 0 | 0 | 0        | 0        | 0.000164 | 0 | 0.001348 | 0 |
| 0 | 0 | 0 | 0        | 0        | 9.86E-05 | 0 | 0.434104 | 0 |
| 0 | 0 | 0 | 0        | 0        | 0.000131 | 0 | 0.425491 | 0 |
| 0 | 0 | 0 | 0        | 0        | 0        | 0 | 0.005687 | 0 |
| 0 | 0 | 0 | 0        | 0        | 0        | 0 | 0.004011 | 0 |
| 0 | 0 | 0 | 0        | 0        | 0        | 0 | 0.017292 | 0 |
| 0 | 0 | 0 | 0        | 0.00023  | 0        | 0 | 0.001183 | 0 |
| 0 | 0 | 0 | 0        | 0        | 0        | 0 | 0.007561 | 0 |
| 0 | 0 | 0 | 0        | 0        | 0        | 0 | 0.006739 | 0 |
| 0 | 0 | 0 | 0        | 0        | 0        | 0 | 0.00286  | 0 |
| 0 | 0 | 0 | 0        | 0        | 0        | 0 | 0.007627 | 0 |
| 0 | 0 | 0 | 0        | 0        | 0        | 0 | 0.007002 | 0 |
| 0 | 0 | 0 | 0        | 0        | 3.29E-05 | 0 | 0.004241 | 0 |
| 0 | 0 | 0 | 0        | 0        | 0        | 0 | 0.002071 | 0 |
| 0 | 0 | 0 | 0        | 0        | 0        | 0 | 0.003616 | 0 |
| 0 | 0 | 0 | 0        | 6.57E-05 | 3.29E-05 | 0 | 0.021598 | 0 |
| 0 | 0 | 0 | 0        | 0        | 3.29E-05 | 0 | 0.013709 | 0 |
| 0 | 0 | 0 | 0        | 0        | 0        | 0 | 0.009599 | 0 |
| 0 | 0 | 0 | 0        | 0        | 0.009139 | 0 | 0.000756 | 0 |
| 0 | 0 | 0 | 0        | 3.29E-05 | 3.29E-05 | 0 | 0.506986 | 0 |
| 0 | 0 | 0 | 0        | 0        | 6.57E-05 | 0 | 0.366942 | 0 |
| 0 | 0 | 0 | 0        | 0        | 0.00069  | 0 | 0.011933 | 0 |
| 0 | 0 | 0 | 0        | 0        | 0        | 0 | 0.000986 | 0 |
| 0 | 0 | 0 | 0        | 0        | 3.29E-05 | 0 | 0.000953 | 0 |
| 0 | 0 | 0 | 3.29E-05 | 0        | 0.001446 | 0 | 0.018673 | 0 |
| 0 | 0 | 0 | 6.57E-05 | 0.001183 | 0.000723 | 0 | 0.194385 | 0 |
| 0 | 0 | 0 | 0        | 0        | 0.000657 | 0 | 0.099444 | 0 |
| 0 | 0 | 0 | 3.29E-05 | 0        | 0.001282 | 0 | 0.0239   | 0 |
| 0 | 0 | 0 | 0        | 0        | 0.002334 | 0 | 0.009172 | 0 |
| 0 | 0 | 0 | 3.29E-05 | 0        | 0.00023  | 0 | 0.108912 | 0 |
| 0 | 0 | 0 | 0        | 0.000493 | 6.57E-05 | 0 | 0.130774 | 0 |
| 0 | 0 | 0 | 0        | 3.29E-05 | 0.008383 | 0 | 0.028338 | 0 |
| 0 | 0 | 0 | 9.86E-05 | 0.000296 | 0.000394 | 0 | 0.042999 | 0 |
| 0 | 0 | 0 | 3.29E-05 | 0.002104 | 0.007364 | 0 | 0.023078 | 0 |
| 0 | 0 | 0 | 0        | 0        | 0.001151 | 0 | 0.002367 | 0 |
| 0 | 0 | 0 | 0        | 0        | 0        | 0 | 0.011013 | 0 |
| 0 | 0 | 0 | 6.57E-05 | 6.57E-05 | 6.57E-05 | 0 | 0.022552 | 0 |
| 0 | 0 | 0 | 0        | 0        | 0.00023  | 0 | 0.084947 | 0 |
| 0 | 0 | 0 | 0        | 0        | 0        | 0 | 0.001414 | 0 |
| 0 | 0 | 0 | 0        | 0        | 9.86E-05 | 0 | 0.159736 | 0 |
| 0 | 0 | 0 | 0        | 0        | 0        | 0 | 0.021138 | 0 |
| 0 | 0 | 0 | 0        | 0        | 0        | 0 | 0.005556 | 0 |
| 0 | 0 | 0 | 0        | 0        | 3.29E-05 | 0 | 0.927414 | 0 |

|   |   |   |          |          |          |          |          |   |
|---|---|---|----------|----------|----------|----------|----------|---|
| 0 | 0 | 0 | 0        | 0        | 6.57E-05 | 0        | 0.955488 | 0 |
| 0 | 0 | 0 | 0        | 0        | 0.000559 | 3.29E-05 | 0.924455 | 0 |
| 0 | 0 | 0 | 0        | 0        | 0        | 0        | 0.238634 | 0 |
| 0 | 0 | 0 | 0        | 0        | 6.57E-05 | 0        | 0.979585 | 0 |
| 0 | 0 | 0 | 0        | 0        | 0        | 0        | 0.169664 | 0 |
| 0 | 0 | 0 | 0        | 6.57E-05 | 0.000493 | 0        | 0.000427 | 0 |
| 0 | 0 | 0 | 0        | 0.000296 | 0.000131 | 0        | 0.001052 | 0 |
| 0 | 0 | 0 | 0        | 9.86E-05 | 3.29E-05 | 0        | 0.006476 | 0 |
| 0 | 0 | 0 | 0        | 0        | 0.002104 | 0        | 0.000723 | 0 |
| 0 | 0 | 0 | 0        | 0        | 0.002498 | 0        | 0.013215 | 0 |
| 0 | 0 | 0 | 0        | 0        | 0.000526 | 0        | 0.052993 | 0 |
| 0 | 0 | 0 | 0.000131 | 0.002203 | 0.007364 | 0        | 0.288175 | 0 |
| 0 | 0 | 0 | 0        | 0.000592 | 0.001578 | 0        | 0.757684 | 0 |
| 0 | 0 | 0 | 3.29E-05 | 0.007002 | 0.002959 | 0        | 0.002761 | 0 |
| 0 | 0 | 0 | 3.29E-05 | 0.006016 | 0.005424 | 0        | 0.008646 | 0 |
| 0 | 0 | 0 | 3.29E-05 | 0        | 0.006739 | 0        | 0.003255 | 0 |
| 0 | 0 | 0 | 0.000164 | 0.002137 | 0        | 0        | 0.169302 | 0 |
| 0 | 0 | 0 | 3.29E-05 | 0.000592 | 0.000131 | 0        | 0.416187 | 0 |
| 0 | 0 | 0 | 0.000131 | 3.29E-05 | 3.29E-05 | 0        | 0.043854 | 0 |
| 0 | 0 | 0 | 0.000197 | 0        | 0        | 0        | 0.044249 | 0 |
| 0 | 0 | 0 | 0        | 0        | 0        | 0        | 0.030836 | 0 |
| 0 | 0 | 0 | 3.29E-05 | 0        | 9.86E-05 | 0        | 0.092541 | 0 |
| 0 | 0 | 0 | 0        | 0        | 0.000164 | 0        | 0.654985 | 0 |
| 0 | 0 | 0 | 0        | 0        | 0        | 0        | 0.775667 | 0 |
| 0 | 0 | 0 | 0        | 0        | 0.000164 | 0        | 0.002104 | 0 |
| 0 | 0 | 0 | 6.57E-05 | 9.86E-05 | 0.00194  | 0        | 0.020941 | 0 |
| 0 | 0 | 0 | 0        | 0        | 6.57E-05 | 0        | 0.126566 | 0 |
| 0 | 0 | 0 | 0        | 0.00023  | 0.000657 | 0        | 0.165324 | 0 |
| 0 | 0 | 0 | 3.29E-05 | 0        | 0.001446 | 0        | 0.015747 | 0 |
| 0 | 0 | 0 | 3.29E-05 | 0        | 0.000296 | 0        | 0.003583 | 0 |
| 0 | 0 | 0 | 0        | 3.29E-05 | 0.000493 | 0        | 0.133009 | 0 |
| 0 | 0 | 0 | 0        | 0        | 0        | 0        | 0.000657 | 0 |
| 0 | 0 | 0 | 0        | 0        | 0        | 0        | 0.002071 | 0 |
| 0 | 0 | 0 | 0        | 0.025477 | 3.29E-05 | 0        | 0.003485 | 0 |
| 0 | 0 | 0 | 0.000131 | 0        | 0.000131 | 0        | 0.023341 | 0 |
| 0 | 0 | 0 | 6.57E-05 | 0        | 0.000197 | 0        | 0.517144 | 0 |
| 0 | 0 | 0 | 6.57E-05 | 3.29E-05 | 3.29E-05 | 0        | 0.009534 | 0 |
| 0 | 0 | 0 | 9.86E-05 | 6.57E-05 | 0        | 0        | 0.045531 | 0 |
| 0 | 0 | 0 | 6.57E-05 | 0.000296 | 0.000427 | 0        | 0.371971 | 0 |
| 0 | 0 | 0 | 6.57E-05 | 0.004537 | 0.001282 | 0        | 0.040994 | 0 |
| 0 | 0 | 0 | 3.29E-05 | 0.001348 | 0.003156 | 0        | 0.011605 | 0 |
| 0 | 0 | 0 | 0        | 6.57E-05 | 0.001348 | 0        | 0.008777 | 0 |
| 0 | 0 | 0 | 0        | 9.86E-05 | 0.007528 | 0        | 0.018936 | 0 |
| 0 | 0 | 0 | 0        | 0.003189 | 0.00812  | 0        | 0.023932 | 0 |
| 0 | 0 | 0 | 0        | 0.001414 | 0.003353 | 0        | 0.025445 | 0 |
| 0 | 0 | 0 | 9.86E-05 | 0.000427 | 0.004307 | 0        | 0.045991 | 0 |
| 0 | 0 | 0 | 0        | 0        | 0.003879 | 0        | 0.018673 | 0 |

|   |   |   |          |          |          |   |          |   |
|---|---|---|----------|----------|----------|---|----------|---|
| 0 | 0 | 0 | 9.86E-05 | 0        | 0.008251 | 0 | 0.073803 | 0 |
| 0 | 0 | 0 | 0        | 0.000822 | 0.000657 | 0 | 0.121536 | 0 |
| 0 | 0 | 0 | 9.86E-05 | 0.000329 | 0.000657 | 0 | 0.062461 | 0 |
| 0 | 0 | 0 | 0        | 0        | 9.86E-05 | 0 | 0.785233 | 0 |
| 0 | 0 | 0 | 0        | 0        | 0        | 0 | 0.021237 | 0 |
| 0 | 0 | 0 | 0        | 0        | 0        | 0 | 0.003353 | 0 |
| 0 | 0 | 0 | 0        | 0.007857 | 0.001446 | 0 | 0.09734  | 0 |
| 0 | 0 | 0 | 0        | 0        | 0        | 0 | 0.000789 | 0 |
| 0 | 0 | 0 | 0        | 0        | 0        | 0 | 0.003781 | 0 |
| 0 | 0 | 0 | 0        | 0.002597 | 3.29E-05 | 0 | 0.08784  | 0 |
| 0 | 0 | 0 | 0        | 0        | 0        | 0 | 0.009008 | 0 |
| 0 | 0 | 0 | 0        | 0.000592 | 0        | 0 | 0.081199 | 0 |
| 0 | 0 | 0 | 0        | 0        | 0        | 0 | 0.00263  | 0 |
| 0 | 0 | 0 | 0        | 0        | 0        | 0 | 0.039613 | 0 |
| 0 | 0 | 0 | 6.57E-05 | 0        | 0        | 0 | 0.021993 | 0 |
| 0 | 0 | 0 | 6.57E-05 | 3.29E-05 | 0.000953 | 0 | 0.020251 | 0 |
| 0 | 0 | 0 | 9.86E-05 | 0        | 0.000329 | 0 | 0.017259 | 0 |
| 0 | 0 | 0 | 3.29E-05 | 3.29E-05 | 0.000131 | 0 | 0.010388 | 0 |
| 0 | 0 | 0 | 9.86E-05 | 0        | 0.000493 | 0 | 0.02676  | 0 |
| 0 | 0 | 0 | 0.000131 | 0        | 0.000164 | 0 | 0.01979  | 0 |
| 0 | 0 | 0 | 0.00023  | 6.57E-05 | 0.000164 | 0 | 0.041586 | 0 |
| 0 | 0 | 0 | 0        | 6.57E-05 | 0.000197 | 0 | 0.015615 | 0 |
| 0 | 0 | 0 | 3.29E-05 | 0        | 0        | 0 | 0.008054 | 0 |
| 0 | 0 | 0 | 3.29E-05 | 0        | 0        | 0 | 0.012459 | 0 |
| 0 | 0 | 0 | 0        | 0        | 9.86E-05 | 0 | 0.912292 | 0 |
| 0 | 0 | 0 | 0        | 0        | 0.000131 | 0 | 0.94842  | 0 |
| 0 | 0 | 0 | 0        | 0        | 0.000164 | 0 | 0.97301  | 0 |
| 0 | 0 | 0 | 0        | 0        | 3.29E-05 | 0 | 0.92028  | 0 |
| 0 | 0 | 0 | 0        | 0        | 3.29E-05 | 0 | 0.442848 | 0 |
| 0 | 0 | 0 | 0        | 0        | 9.86E-05 | 0 | 0.968375 | 0 |
| 0 | 0 | 0 | 0        | 0        | 0        | 0 | 0.000164 | 0 |
| 0 | 0 | 0 | 0        | 0        | 0        | 0 | 0.000526 | 0 |
| 0 | 0 | 0 | 0        | 0        | 0        | 0 | 0.033893 | 0 |
| 0 | 0 | 0 | 0        | 0        | 0        | 0 | 0.063283 | 0 |
| 0 | 0 | 0 | 0.000131 | 0.152142 | 0.001183 | 0 | 0.028864 | 0 |
| 0 | 0 | 0 | 3.29E-05 | 0.001907 | 0.00046  | 0 | 0.025083 | 0 |
| 0 | 0 | 0 | 9.86E-05 | 0        | 6.57E-05 | 0 | 0.028042 | 0 |
| 0 | 0 | 0 | 6.57E-05 | 0        | 0.000394 | 0 | 0.009238 | 0 |
| 0 | 0 | 0 | 0        | 0.002038 | 0.003287 | 0 | 0.162103 | 0 |
| 0 | 0 | 0 | 6.57E-05 | 3.29E-05 | 3.29E-05 | 0 | 0.033597 | 0 |
| 0 | 0 | 0 | 3.29E-05 | 0        | 3.29E-05 | 0 | 0.034288 | 0 |
| 0 | 0 | 0 | 0        | 0        | 0.000888 | 0 | 0.01052  | 0 |
| 0 | 0 | 0 | 0        | 9.86E-05 | 0.001315 | 0 | 0.130543 | 0 |
| 0 | 0 | 0 | 0        | 0        | 0.003057 | 0 | 0.005128 | 0 |
| 0 | 0 | 0 | 0        | 0        | 6.57E-05 | 0 | 0.773168 | 0 |
| 0 | 0 | 0 | 0        | 0        | 0.001512 | 0 | 0.007331 | 0 |
| 0 | 0 | 0 | 0        | 0        | 0.001348 | 0 | 0.00835  | 0 |

|   |   |   |          |          |          |   |          |   |
|---|---|---|----------|----------|----------|---|----------|---|
| 0 | 0 | 0 | 0        | 0.000329 | 0.022683 | 0 | 0.080246 | 0 |
| 0 | 0 | 0 | 3.29E-05 | 0.000296 | 0.003649 | 0 | 0.234327 | 0 |
| 0 | 0 | 0 | 0        | 0.00069  | 0.001085 | 0 | 0.454025 | 0 |
| 0 | 0 | 0 | 0        | 0        | 0.001479 | 0 | 0.17923  | 0 |
| 0 | 0 | 0 | 0        | 0.003419 | 3.29E-05 | 0 | 0.004997 | 0 |
| 0 | 0 | 0 | 0        | 0.000164 | 0        | 0 | 0.027121 | 0 |
| 0 | 0 | 0 | 0        | 0        | 0.001907 | 0 | 0.005391 | 0 |
| 0 | 0 | 0 | 0        | 0        | 0        | 0 | 0.000164 | 0 |
| 0 | 0 | 0 | 0        | 0        | 0        | 0 | 0.000526 | 0 |
| 0 | 0 | 0 | 0        | 0        | 6.57E-05 | 0 | 0.006312 | 0 |
| 0 | 0 | 0 | 0        | 0        | 0.000657 | 0 | 0.001151 | 0 |
| 0 | 0 | 0 | 0        | 0        | 0.000296 | 0 | 0.000164 | 0 |
| 0 | 0 | 0 | 0        | 0        | 0.00023  | 0 | 0.003781 | 0 |
| 0 | 0 | 0 | 0        | 0        | 0        | 0 | 0.000164 | 0 |
| 0 | 0 | 0 | 0        | 0        | 6.57E-05 | 0 | 0.767448 | 0 |
| 0 | 0 | 0 | 0        | 6.57E-05 | 9.86E-05 | 0 | 0.475164 | 0 |
| 0 | 0 | 0 | 0        | 0        | 3.29E-05 | 0 | 0.177422 | 0 |
| 0 | 0 | 0 | 0        | 0        | 0.000164 | 0 | 0.759953 | 0 |
| 0 | 0 | 0 | 0        | 6.57E-05 | 0.000197 | 0 | 0.757093 | 0 |
| 0 | 0 | 0 | 0        | 0        | 6.57E-05 | 0 | 0.460009 | 0 |
| 0 | 0 | 0 | 0        | 6.57E-05 | 3.29E-05 | 0 | 0.598409 | 0 |
| 0 | 0 | 0 | 0        | 0        | 3.29E-05 | 0 | 0.449423 | 0 |
| 0 | 0 | 0 | 0        | 0        | 3.29E-05 | 0 | 0.153424 | 0 |
| 0 | 0 | 0 | 0        | 0        | 6.57E-05 | 0 | 0.844439 | 0 |
| 0 | 0 | 0 | 6.57E-05 | 0        | 0.000164 | 0 | 0.987935 | 0 |
| 0 | 0 | 0 | 0        | 0        | 3.29E-05 | 0 | 0.907854 | 0 |
| 0 | 0 | 0 | 3.29E-05 | 3.29E-05 | 9.86E-05 | 0 | 0.962425 | 0 |
| 0 | 0 | 0 | 0        | 0        | 0        | 0 | 0.768763 | 0 |
| 0 | 0 | 0 | 0        | 0        | 0.00069  | 0 | 0.260232 | 0 |
| 0 | 0 | 0 | 0        | 0        | 3.29E-05 | 0 | 0.468391 | 0 |
| 0 | 0 | 0 | 0        | 0        | 0        | 0 | 0.312338 | 0 |
| 0 | 0 | 0 | 0        | 0        | 3.29E-05 | 0 | 0.554193 | 0 |
| 0 | 0 | 0 | 3.29E-05 | 0        | 0        | 0 | 0.416319 | 0 |
| 0 | 0 | 0 | 0        | 0        | 3.29E-05 | 0 | 0.424636 | 0 |
| 0 | 0 | 0 | 0        | 0        | 0.000197 | 0 | 0.338473 | 0 |
| 0 | 0 | 0 | 0        | 3.29E-05 | 0        | 0 | 0.315165 | 0 |
| 0 | 0 | 0 | 3.29E-05 | 0.000164 | 0        | 0 | 0.020974 | 0 |
| 0 | 0 | 0 | 0        | 0        | 0        | 0 | 0.001348 | 0 |
| 0 | 0 | 0 | 0        | 0.000197 | 0        | 0 | 0.018212 | 0 |
| 0 | 0 | 0 | 0        | 0        | 0        | 0 | 0.004898 | 0 |
| 0 | 0 | 0 | 0        | 0.036589 | 0.00526  | 0 | 0.014136 | 0 |
| 0 | 0 | 0 | 6.57E-05 | 3.29E-05 | 0.000164 | 0 | 0.007364 | 0 |
| 0 | 0 | 0 | 0        | 0        | 3.29E-05 | 0 | 0.025872 | 0 |
| 0 | 0 | 0 | 0.000131 | 9.86E-05 | 0        | 0 | 0.040698 | 0 |
| 0 | 0 | 0 | 3.29E-05 | 0        | 0        | 0 | 0.009698 | 0 |
| 0 | 0 | 0 | 0        | 0.003057 | 0.001183 | 0 | 0.12341  | 0 |
| 0 | 0 | 0 | 0        | 0        | 6.57E-05 | 0 | 0.001644 | 0 |

|   |   |          |          |          |          |   |          |   |
|---|---|----------|----------|----------|----------|---|----------|---|
| 0 | 0 | 0        | 0        | 9.86E-05 | 0.000493 | 0 | 0.023176 | 0 |
| 0 | 0 | 0        | 0        | 0        | 0        | 0 | 0.0024   | 0 |
| 0 | 0 | 0        | 0        | 0        | 6.57E-05 | 0 | 0.00046  | 0 |
| 0 | 0 | 0        | 6.57E-05 | 0        | 3.29E-05 | 0 | 0.032414 | 0 |
| 0 | 0 | 0        | 0        | 0        | 0.000164 | 0 | 0.021861 | 0 |
| 0 | 0 | 0        | 0.000197 | 6.57E-05 | 0.004504 | 0 | 0.073507 | 0 |
| 0 | 0 | 0        | 3.29E-05 | 0        | 0.000329 | 0 | 0.016338 | 0 |
| 0 | 0 | 0        | 6.57E-05 | 0        | 3.29E-05 | 0 | 0.016404 | 0 |
| 0 | 0 | 0        | 0.000164 | 6.57E-05 | 3.29E-05 | 0 | 0.015911 | 0 |
| 0 | 0 | 0        | 0        | 0        | 9.86E-05 | 0 | 0.012525 | 0 |
| 0 | 0 | 0        | 3.29E-05 | 0        | 0.001677 | 0 | 0.013807 | 0 |
| 0 | 0 | 0        | 0        | 0        | 6.57E-05 | 0 | 0.001808 | 0 |
| 0 | 0 | 0        | 0        | 0        | 0.000263 | 0 | 0.023111 | 0 |
| 0 | 0 | 0        | 0.000164 | 3.29E-05 | 0.056445 | 0 | 0.053355 | 0 |
| 0 | 0 | 0        | 9.86E-05 | 0        | 0        | 0 | 0.031493 | 0 |
| 0 | 0 | 0        | 0        | 0        | 0.000164 | 0 | 0.80476  | 0 |
| 0 | 0 | 0        | 0        | 0        | 0        | 0 | 0.001775 | 0 |
| 0 | 0 | 0        | 0        | 0        | 3.29E-05 | 0 | 0.003649 | 0 |
| 0 | 0 | 0        | 0        | 0        | 6.57E-05 | 0 | 0.002531 | 0 |
| 0 | 0 | 0        | 0        | 0        | 0        | 0 | 0.009961 | 0 |
| 0 | 0 | 0        | 3.29E-05 | 6.57E-05 | 0        | 0 | 0.002794 | 0 |
| 0 | 0 | 0        | 6.57E-05 | 0        | 0        | 0 | 0.012328 | 0 |
| 0 | 0 | 0        | 0        | 3.29E-05 | 3.29E-05 | 0 | 0.016273 | 0 |
| 0 | 0 | 0        | 0        | 0        | 9.86E-05 | 0 | 0.00263  | 0 |
| 0 | 0 | 0        | 0        | 3.29E-05 | 0.000789 | 0 | 0.001775 | 0 |
| 0 | 0 | 0        | 0        | 0        | 0.001972 | 0 | 0.003353 | 0 |
| 0 | 0 | 0        | 0        | 0        | 0.000493 | 0 | 0.003682 | 0 |
| 0 | 0 | 0        | 3.29E-05 | 0        | 0.000164 | 0 | 0.00309  | 0 |
| 0 | 0 | 0        | 0        | 0        | 0        | 0 | 0.005194 | 0 |
| 0 | 0 | 0        | 3.29E-05 | 0        | 6.57E-05 | 0 | 0.00526  | 0 |
| 0 | 0 | 0        | 0        | 0        | 6.57E-05 | 0 | 0.000296 | 0 |
| 0 | 0 | 0        | 0        | 0.00023  | 0        | 0 | 0.005424 | 0 |
| 0 | 0 | 3.29E-05 | 0        | 0        | 0        | 0 | 0.000625 | 0 |
| 0 | 0 | 0        | 0        | 0        | 0        | 0 | 0.000986 | 0 |
| 0 | 0 | 0        | 0        | 0        | 0        | 0 | 0        | 0 |
| 0 | 0 | 0        | 0        | 0        | 0        | 0 | 0.004997 | 0 |
| 0 | 0 | 0        | 3.29E-05 | 0.001052 | 9.86E-05 | 0 | 0.111181 | 0 |
| 0 | 0 | 0        | 3.29E-05 | 0.000592 | 3.29E-05 | 0 | 0.15944  | 0 |
| 0 | 0 | 0        | 0        | 0.000625 | 0.001183 | 0 | 0.134127 | 0 |
| 0 | 0 | 0        | 0        | 0.000131 | 3.29E-05 | 0 | 0.112298 | 0 |
| 0 | 0 | 0        | 0        | 0        | 0        | 0 | 0.012131 | 0 |
| 0 | 0 | 0        | 0        | 0        | 0        | 0 | 0.000625 | 0 |
| 0 | 0 | 0        | 0        | 0        | 3.29E-05 | 0 | 0.145172 | 0 |
| 0 | 0 | 0        | 3.29E-05 | 0.000427 | 0.001315 | 0 | 0.20668  | 0 |
| 0 | 0 | 0        | 0        | 0        | 3.29E-05 | 0 | 0.004701 | 0 |
| 0 | 0 | 0        | 0        | 0        | 0        | 0 | 0.036359 | 0 |
| 0 | 0 | 0        | 0        | 0        | 0.000131 | 0 | 0.385713 | 0 |

|   |   |   |          |          |          |          |          |   |
|---|---|---|----------|----------|----------|----------|----------|---|
| 0 | 0 | 0 | 0        | 0        | 0        | 0        | 0.005063 | 0 |
| 0 | 0 | 0 | 0        | 0.002137 | 3.29E-05 | 0        | 0.169203 | 0 |
| 0 | 0 | 0 | 0        | 0        | 0        | 0        | 0.002564 | 0 |
| 0 | 0 | 0 | 0        | 0        | 0.000164 | 0        | 0.893422 | 0 |
| 0 | 0 | 0 | 0        | 0        | 6.57E-05 | 0        | 0.77639  | 0 |
| 0 | 0 | 0 | 0        | 0        | 0.00023  | 0        | 0.994937 | 0 |
| 0 | 0 | 0 | 0        | 3.29E-05 | 0.000131 | 0        | 0.963378 | 0 |
| 0 | 0 | 0 | 0        | 0        | 0.000131 | 0        | 0.996614 | 0 |
| 0 | 0 | 0 | 0        | 0        | 0.000131 | 0        | 0.980933 | 0 |
| 0 | 0 | 0 | 0        | 0        | 6.57E-05 | 0        | 0.895855 | 0 |
| 0 | 0 | 0 | 0        | 0        | 9.86E-05 | 0        | 0.91936  | 0 |
| 0 | 0 | 0 | 0        | 0        | 9.86E-05 | 0        | 0.900983 | 0 |
| 0 | 0 | 0 | 0        | 0        | 9.86E-05 | 0        | 0.951839 | 0 |
| 0 | 0 | 0 | 0        | 0        | 0.000131 | 0        | 0.979487 | 0 |
| 0 | 0 | 0 | 0        | 0        | 0.000164 | 0        | 0.672935 | 0 |
| 0 | 0 | 0 | 0        | 0        | 0.000197 | 0        | 0.873632 | 0 |
| 0 | 0 | 0 | 0        | 0        | 0.000296 | 0        | 0.932707 | 0 |
| 0 | 0 | 0 | 3.29E-05 | 0        | 0        | 0        | 0.008613 | 0 |
| 0 | 0 | 0 | 0        | 0        | 0        | 0        | 0.020842 | 0 |
| 0 | 0 | 0 | 0        | 0        | 0        | 0        | 0.003682 | 0 |
| 0 | 0 | 0 | 0        | 0        | 0        | 0        | 0.002071 | 0 |
| 0 | 0 | 0 | 3.29E-05 | 9.86E-05 | 0.000164 | 0        | 0.410566 | 0 |
| 0 | 0 | 0 | 0        | 0        | 0        | 0        | 0.011309 | 0 |
| 0 | 0 | 0 | 6.57E-05 | 0        | 0        | 0        | 0.015845 | 0 |
| 0 | 0 | 0 | 0        | 0        | 0        | 0        | 0.00526  | 0 |
| 0 | 0 | 0 | 0        | 0.001972 | 0.002564 | 0        | 0.125777 | 0 |
| 0 | 0 | 0 | 0        | 0        | 0.000131 | 0        | 0.372136 | 0 |
| 0 | 0 | 0 | 0        | 0.006312 | 0.000394 | 0        | 0.008514 | 0 |
| 0 | 0 | 0 | 0        | 0.002235 | 0.00023  | 0        | 0.085046 | 0 |
| 0 | 0 | 0 | 0        | 0.001151 | 0.000427 | 0        | 0.288767 | 0 |
| 0 | 0 | 0 | 0        | 0.00023  | 0.002531 | 0        | 0.012952 | 0 |
| 0 | 0 | 0 | 0        | 0.00069  | 0.00046  | 0        | 0.78497  | 0 |
| 0 | 0 | 0 | 0        | 0        | 0.002761 | 0        | 0.007101 | 0 |
| 0 | 0 | 0 | 0        | 0        | 0.000296 | 0        | 0.00092  | 0 |
| 0 | 0 | 0 | 0        | 0        | 0.001183 | 0        | 0.288471 | 0 |
| 0 | 0 | 0 | 0        | 0        | 0        | 3.29E-05 | 0.006115 | 0 |
| 0 | 0 | 0 | 0        | 0.000329 | 0.002794 | 0        | 0.008482 | 0 |
| 0 | 0 | 0 | 0        | 0        | 9.86E-05 | 0        | 0.010158 | 0 |
| 0 | 0 | 0 | 0        | 3.29E-05 | 9.86E-05 | 0        | 0.003682 | 0 |
| 0 | 0 | 0 | 6.57E-05 | 0        | 0.00023  | 0        | 0.011013 | 0 |
| 0 | 0 | 0 | 0.000164 | 0        | 0.000296 | 0        | 0.070417 | 0 |
| 0 | 0 | 0 | 0        | 3.29E-05 | 0        | 0        | 0.000953 | 0 |
| 0 | 0 | 0 | 0        | 3.29E-05 | 0.000131 | 0        | 0.014662 | 0 |
| 0 | 0 | 0 | 3.29E-05 | 0        | 0.00023  | 0        | 0.014563 | 0 |
| 0 | 0 | 0 | 0        | 0        | 0.000329 | 0        | 0.768631 | 0 |
| 0 | 0 | 0 | 0        | 0.000526 | 0.000197 | 0        | 0.28354  | 0 |
| 0 | 0 | 0 | 3.29E-05 | 0        | 0.00023  | 0        | 0.015024 | 0 |



|          |   |   |          |          |          |   |          |   |
|----------|---|---|----------|----------|----------|---|----------|---|
| 0        | 0 | 0 | 0        | 0        | 0        | 0 | 0.00023  | 0 |
| 0        | 0 | 0 | 3.29E-05 | 0        | 0        | 0 | 0.095763 | 0 |
| 0        | 0 | 0 | 0        | 0.000986 | 0.000625 | 0 | 0.003057 | 0 |
| 0        | 0 | 0 | 0        | 0        | 0        | 0 | 0.003353 | 0 |
| 0        | 0 | 0 | 0        | 0        | 0        | 0 | 0.000625 | 0 |
| 0        | 0 | 0 | 0        | 0        | 0        | 0 | 0.001512 | 0 |
| 0        | 0 | 0 | 0        | 3.29E-05 | 0        | 0 | 0.001151 | 0 |
| 0        | 0 | 0 | 3.29E-05 | 0        | 0        | 0 | 0.031592 | 0 |
| 0        | 0 | 0 | 0        | 0        | 0        | 0 | 0.000822 | 0 |
| 0        | 0 | 0 | 0        | 0.004109 | 3.29E-05 | 0 | 0.141425 | 0 |
| 0        | 0 | 0 | 0        | 0        | 0        | 0 | 0.001315 | 0 |
| 0        | 0 | 0 | 0        | 0        | 0        | 0 | 0.006246 | 0 |
| 0        | 0 | 0 | 0        | 3.29E-05 | 3.29E-05 | 0 | 0.026628 | 0 |
| 0        | 0 | 0 | 6.57E-05 | 9.86E-05 | 0.000197 | 0 | 0.0406   | 0 |
| 0        | 0 | 0 | 0        | 3.29E-05 | 0        | 0 | 0.008777 | 0 |
| 0        | 0 | 0 | 0        | 0        | 3.29E-05 | 0 | 0.001972 | 0 |
| 0        | 0 | 0 | 0        | 0        | 0        | 0 | 0.003353 | 0 |
| 0        | 0 | 0 | 0        | 0        | 0        | 0 | 0.000756 | 0 |
| 0        | 0 | 0 | 0        | 0        | 0        | 0 | 0.019264 | 0 |
| 0        | 0 | 0 | 0        | 0        | 0        | 0 | 0.001348 | 0 |
| 0        | 0 | 0 | 0        | 0        | 0        | 0 | 0.002071 | 0 |
| 0        | 0 | 0 | 0        | 0        | 3.29E-05 | 0 | 0.002597 | 0 |
| 0        | 0 | 0 | 0        | 0        | 0        | 0 | 0.000657 | 0 |
| 0        | 0 | 0 | 0        | 0        | 0        | 0 | 0.000131 | 0 |
| 0        | 0 | 0 | 3.29E-05 | 0        | 9.86E-05 | 0 | 0.581512 | 0 |
| 0        | 0 | 0 | 0        | 0        | 0.000362 | 0 | 0.009731 | 0 |
| 0        | 0 | 0 | 0        | 0        | 0        | 0 | 9.86E-05 | 0 |
| 0        | 0 | 0 | 3.29E-05 | 0        | 0.008219 | 0 | 0.055722 | 0 |
| 6.57E-05 | 0 | 0 | 3.29E-05 | 0.000888 | 0.013084 | 0 | 0.014399 | 0 |
| 0        | 0 | 0 | 0.000164 | 3.29E-05 | 0.002959 | 0 | 0.037246 | 0 |
| 0        | 0 | 0 | 3.29E-05 | 0        | 0.001381 | 0 | 0.020119 | 0 |
| 0        | 0 | 0 | 3.29E-05 | 0        | 0.001381 | 0 | 0.028042 | 0 |
| 0        | 0 | 0 | 3.29E-05 | 0        | 9.86E-05 | 0 | 0.38213  | 0 |
| 0        | 0 | 0 | 3.29E-05 | 0        | 0.002005 | 0 | 0.01098  | 0 |
| 0        | 0 | 0 | 0        | 0        | 0.003123 | 0 | 0.042145 | 0 |
| 0        | 0 | 0 | 0        | 0.002301 | 0.000131 | 0 | 0.724909 | 0 |
| 0        | 0 | 0 | 0        | 0        | 0        | 0 | 0.035997 | 0 |
| 0        | 0 | 0 | 0        | 0.001874 | 3.29E-05 | 0 | 0.166015 | 0 |
| 0        | 0 | 0 | 0        | 0        | 0        | 0 | 0.012722 | 0 |
| 0        | 0 | 0 | 0        | 0        | 0        | 0 | 0.002433 | 0 |
| 0        | 0 | 0 | 0        | 3.29E-05 | 0        | 0 | 0.005095 | 0 |
| 0        | 0 | 0 | 0        | 0        | 0.002761 | 0 | 0.014892 | 0 |
| 0        | 0 | 0 | 0        | 0.001907 | 0.001512 | 0 | 0.198396 | 0 |
| 0        | 0 | 0 | 0        | 0.000131 | 0.001085 | 0 | 0.01098  | 0 |
| 0        | 0 | 0 | 0        | 0        | 0.000164 | 0 | 0.001677 | 0 |
| 0        | 0 | 0 | 0        | 0.001742 | 0.000789 | 0 | 0.002663 | 0 |
| 0        | 0 | 0 | 3.29E-05 | 0        | 0        | 0 | 0.016437 | 0 |



|   |   |   |          |          |          |   |          |   |
|---|---|---|----------|----------|----------|---|----------|---|
| 0 | 0 | 0 | 0        | 0        | 9.86E-05 | 0 | 0.0024   | 0 |
| 0 | 0 | 0 | 0        | 0        | 0.001414 | 0 | 0.011309 | 0 |
| 0 | 0 | 0 | 3.29E-05 | 0        | 0.003583 | 0 | 0.017489 | 0 |
| 0 | 0 | 0 | 0        | 0.000131 | 0.000789 | 0 | 0.003123 | 0 |
| 0 | 0 | 0 | 0        | 0        | 0.005161 | 0 | 0.002137 | 0 |
| 0 | 0 | 0 | 0        | 0        | 0.008646 | 0 | 0.002005 | 0 |
| 0 | 0 | 0 | 0        | 0        | 0.002235 | 0 | 0.006673 | 0 |
| 0 | 0 | 0 | 0        | 0        | 0.001249 | 0 | 0.002498 | 0 |
| 0 | 0 | 0 | 0        | 0        | 0.000986 | 0 | 0.001118 | 0 |
| 0 | 0 | 0 | 0        | 0        | 0.001052 | 0 | 0.000953 | 0 |
| 0 | 0 | 0 | 0        | 0.002367 | 0.001709 | 0 | 0.033104 | 0 |
| 0 | 0 | 0 | 0        | 0.000427 | 0        | 0 | 0.000164 | 0 |
| 0 | 0 | 0 | 0        | 3.29E-05 | 0.00023  | 0 | 0.000559 | 0 |
| 0 | 0 | 0 | 0        | 0.000197 | 0.000263 | 0 | 0.859561 | 0 |
| 0 | 0 | 0 | 0        | 6.57E-05 | 6.57E-05 | 0 | 0.499195 | 0 |
| 0 | 0 | 0 | 0        | 0.000164 | 0.000131 | 0 | 0.699103 | 0 |
| 0 | 0 | 0 | 0        | 0        | 0.000164 | 0 | 0.945495 | 0 |
| 0 | 0 | 0 | 0        | 0        | 3.29E-05 | 0 | 0.226207 | 0 |
| 0 | 0 | 0 | 6.57E-05 | 6.57E-05 | 0.000263 | 0 | 0.291397 | 0 |
| 0 | 0 | 0 | 0        | 0.00046  | 0.000427 | 0 | 0.313291 | 0 |
| 0 | 0 | 0 | 0        | 0        | 3.29E-05 | 0 | 0.535258 | 0 |
| 0 | 0 | 0 | 3.29E-05 | 0.000131 | 6.57E-05 | 0 | 0.402775 | 0 |
| 0 | 0 | 0 | 0        | 0        | 6.57E-05 | 0 | 0.569249 | 0 |
| 0 | 0 | 0 | 0        | 3.29E-05 | 0        | 0 | 0.687564 | 0 |
| 0 | 0 | 0 | 0        | 0.004044 | 0        | 0 | 0.334331 | 0 |
| 0 | 0 | 0 | 0        | 0        | 9.86E-05 | 0 | 0.579112 | 0 |
| 0 | 0 | 0 | 3.29E-05 | 0        | 0.000164 | 0 | 0.706959 | 0 |
| 0 | 0 | 0 | 0        | 0        | 0.000131 | 0 | 0.982347 | 0 |
| 0 | 0 | 0 | 0        | 0        | 0.000197 | 0 | 0.945133 | 0 |
| 0 | 0 | 0 | 9.86E-05 | 0        | 6.57E-05 | 0 | 0.903449 | 0 |
| 0 | 0 | 0 | 0        | 0        | 0.000131 | 0 | 0.969558 | 0 |
| 0 | 0 | 0 | 0        | 0        | 0.000131 | 0 | 0.98422  | 0 |
| 0 | 0 | 0 | 0        | 0        | 0.000263 | 0 | 0.950656 | 0 |
| 0 | 0 | 0 | 0        | 0        | 9.86E-05 | 0 | 0.694533 | 0 |
| 0 | 0 | 0 | 0        | 3.29E-05 | 0.000164 | 0 | 0.993261 | 0 |
| 0 | 0 | 0 | 6.57E-05 | 0        | 0.002926 | 0 | 0.022354 | 0 |
| 0 | 0 | 0 | 0        | 0        | 0.00046  | 0 | 0.002433 | 0 |
| 0 | 0 | 0 | 9.86E-05 | 0        | 0.000855 | 0 | 0.013084 | 0 |
| 0 | 0 | 0 | 3.29E-05 | 0.025971 | 0.002367 | 0 | 0.008876 | 0 |
| 0 | 0 | 0 | 0        | 0        | 0.005063 | 0 | 0.009566 | 0 |
| 0 | 0 | 0 | 0        | 0        | 0        | 0 | 0.012295 | 0 |
| 0 | 0 | 0 | 0        | 0        | 3.29E-05 | 0 | 0.01006  | 0 |
| 0 | 0 | 0 | 0.000131 | 0        | 0.001085 | 0 | 0.027055 | 0 |
| 0 | 0 | 0 | 6.57E-05 | 0        | 0.00046  | 0 | 0.02265  | 0 |
| 0 | 0 | 0 | 0.000164 | 0.000427 | 0.003978 | 0 | 0.054637 | 0 |
| 0 | 0 | 0 | 0        | 0.000164 | 9.86E-05 | 0 | 0.579868 | 0 |
| 0 | 0 | 0 | 3.29E-05 | 0        | 0.000197 | 0 | 0.365298 | 0 |

|   |   |   |          |          |          |          |          |          |
|---|---|---|----------|----------|----------|----------|----------|----------|
| 0 | 0 | 0 | 3.29E-05 | 0.001085 | 0        | 0        | 0.076268 | 0        |
| 0 | 0 | 0 | 6.57E-05 | 0        | 0        | 0        | 0.014498 | 0        |
| 0 | 0 | 0 | 0        | 0        | 0.000131 | 0        | 0.000592 | 0        |
| 0 | 0 | 0 | 0        | 0        | 0.021796 | 0        | 0.00069  | 0        |
| 0 | 0 | 0 | 0        | 0        | 0        | 0        | 0.000526 | 0        |
| 0 | 0 | 0 | 0        | 0        | 0.000131 | 0        | 0.202406 | 0        |
| 0 | 0 | 0 | 0        | 6.57E-05 | 3.29E-05 | 0        | 0.003715 | 0        |
| 0 | 0 | 0 | 6.57E-05 | 3.29E-05 | 6.57E-05 | 0        | 0.01453  | 0        |
| 0 | 0 | 0 | 0        | 0        | 0.000296 | 0        | 0.661264 | 0        |
| 0 | 0 | 0 | 0        | 3.29E-05 | 3.29E-05 | 0        | 0.097472 | 0        |
| 0 | 0 | 0 | 3.29E-05 | 0.000164 | 0.004833 | 0        | 0.04747  | 0        |
| 0 | 0 | 0 | 6.57E-05 | 0.012788 | 0.000657 | 0        | 0.092902 | 0        |
| 0 | 0 | 0 | 0        | 0.001545 | 0.000657 | 0        | 0.559321 | 0        |
| 0 | 0 | 0 | 6.57E-05 | 0.001183 | 0.000986 | 3.29E-05 | 0.297939 | 3.29E-05 |
| 0 | 0 | 0 | 0        | 0.021598 | 9.86E-05 | 0        | 0.289161 | 0        |
| 0 | 0 | 0 | 3.29E-05 | 0.013281 | 0.000723 | 0        | 0.285578 | 0        |
| 0 | 0 | 0 | 0        | 0.001775 | 0.000559 | 0        | 0.76873  | 0        |
| 0 | 0 | 0 | 0        | 0.001578 | 0.00069  | 0        | 0.592459 | 0        |
| 0 | 0 | 0 | 3.29E-05 | 0        | 0.000263 | 0        | 0.003879 | 0        |
| 0 | 0 | 0 | 0.000131 | 0.014728 | 0.000953 | 3.29E-05 | 0.086229 | 3.29E-05 |
| 0 | 0 | 0 | 3.29E-05 | 3.29E-05 | 0.000559 | 0        | 0.049344 | 0        |
| 0 | 0 | 0 | 0        | 0.005786 | 0.001512 | 0        | 0.072192 | 0        |
| 0 | 0 | 0 | 3.29E-05 | 3.29E-05 | 0.001118 | 0        | 0.005983 | 0        |

| k_Bacteri |
|-----------|-----------|-----------|-----------|-----------|-----------|-----------|-----------|-----------|
| 0         | 0         | 0         | 9.86E-05  | 0         | 0         | 0         | 0         | 0         |
| 0         | 0         | 0         | 0         | 0         | 6.57E-05  | 0         | 0         | 3.29E-05  |
| 0         | 6.57E-05  | 0         | 0         | 0         | 3.29E-05  | 0         | 0         | 3.29E-05  |
| 0         | 3.29E-05  | 0         | 3.29E-05  | 0         | 6.57E-05  | 0         | 0         | 0         |
| 0         | 0         | 0         | 0.001183  | 0         | 0.000362  | 3.29E-05  | 0         | 0.000329  |
| 0         | 3.29E-05  | 0         | 3.29E-05  | 3.29E-05  | 0.000723  | 0         | 0         | 0         |
| 0         | 0         | 0         | 9.86E-05  | 0         | 0.000559  | 0         | 0         | 6.57E-05  |
| 0         | 0         | 0         | 0         | 0         | 0.711397  | 0         | 0         | 0         |
| 0         | 3.29E-05  | 0         | 0.000131  | 0         | 0.001677  | 0         | 0         | 0.001611  |
| 0         | 0         | 0         | 0         | 0         | 3.29E-05  | 0         | 0         | 0         |
| 0         | 3.29E-05  | 0         | 0         | 0         | 0.000263  | 0         | 0         | 0         |
| 0         | 0         | 9.86E-05  | 0         | 0         | 0.884973  | 0         | 0         | 0         |
| 0         | 0.000657  | 0         | 0         | 0         | 0.00858   | 0         | 0         | 0         |
| 0         | 0         | 6.57E-05  | 0.469082  | 6.57E-05  | 0.000723  | 0         | 6.57E-05  | 0.050429  |
| 0         | 3.29E-05  | 0         | 0         | 0         | 0.000296  | 0         | 0         | 0.000197  |
| 0         | 6.57E-05  | 0         | 0         | 0         | 0         | 0         | 0         | 3.29E-05  |
| 0         | 3.29E-05  | 0         | 0.040271  | 0         | 3.29E-05  | 0         | 0.000427  | 0.018048  |
| 0         | 0         | 0         | 0         | 0         | 9.86E-05  | 0         | 0         | 0         |
| 0         | 0.000164  | 0         | 0.000559  | 0         | 6.57E-05  | 0         | 0         | 0.002301  |
| 0         | 9.86E-05  | 0         | 0.000394  | 0         | 0.000131  | 0         | 0         | 0.000263  |
| 0         | 0.000197  | 0         | 3.29E-05  | 0         | 0.000953  | 0         | 0         | 0         |
| 0         | 0         | 0         | 3.29E-05  | 3.29E-05  | 9.86E-05  | 0         | 0         | 0         |
| 0         | 0         | 0         | 0         | 0         | 3.29E-05  | 0         | 0         | 0         |
| 0         | 0         | 0         | 0         | 0         | 0         | 0         | 0         | 0         |
| 0         | 0         | 0         | 0         | 0         | 0.001019  | 0         | 0         | 0         |
| 0         | 9.86E-05  | 0         | 0         | 0         | 0.000131  | 0         | 0         | 0         |
| 0         | 0         | 0         | 0         | 0         | 0         | 0         | 0         | 3.29E-05  |
| 0         | 0         | 0         | 0         | 0         | 3.29E-05  | 0         | 0         | 9.86E-05  |
| 0         | 0         | 0         | 6.57E-05  | 0         | 0         | 0         | 0         | 3.29E-05  |
| 0         | 3.29E-05  | 0         | 3.29E-05  | 0         | 0.000263  | 0         | 0         | 0.002564  |
| 0         | 6.57E-05  | 0         | 3.29E-05  | 0         | 9.86E-05  | 0         | 0         | 3.29E-05  |
| 0         | 0.000197  | 0         | 3.29E-05  | 0         | 0.000329  | 0         | 0         | 0.000559  |
| 0         | 0         | 0         | 0         | 0         | 0.00023   | 0         | 0         | 0         |
| 0         | 3.29E-05  | 0         | 0         | 0         | 0         | 0         | 0         | 0         |
| 0         | 0         | 0         | 3.29E-05  | 0         | 9.86E-05  | 0         | 0         | 0         |
| 0         | 0         | 0         | 0         | 0         | 3.29E-05  | 0         | 0         | 0         |
| 0         | 0.000197  | 0         | 0.000131  | 0         | 0.000131  | 0         | 0         | 6.57E-05  |
| 0         | 0.006838  | 0         | 0.00046   | 0         | 0.054341  | 0         | 0         | 0.000888  |
| 0         | 0         | 0         | 0         | 0         | 0         | 0         | 0         | 0         |
| 0         | 0         | 3.29E-05  | 0         | 0         | 0.000394  | 0         | 0         | 6.57E-05  |
| 0         | 0.000131  | 0         | 0         | 0         | 3.29E-05  | 0         | 0         | 0         |
| 0         | 0         | 0         | 0         | 0         | 0.001709  | 0         | 0         | 9.86E-05  |
| 0         | 6.57E-05  | 0         | 0         | 0         | 0.000559  | 0         | 0         | 0.00023   |
| 0         | 6.57E-05  | 0         | 0         | 0         | 3.29E-05  | 0         | 0         | 0         |





|   |          |          |          |          |          |   |          |          |
|---|----------|----------|----------|----------|----------|---|----------|----------|
| 0 | 0        | 0        | 6.57E-05 | 0        | 3.29E-05 | 0 | 0        | 0        |
| 0 | 0        | 0        | 3.29E-05 | 0        | 0        | 0 | 0        | 0.035241 |
| 0 | 3.29E-05 | 0        | 0        | 0        | 0        | 0 | 0        | 0.004405 |
| 0 | 0        | 0        | 0        | 0        | 9.86E-05 | 0 | 0        | 0.005753 |
| 0 | 0        | 0.000164 | 0        | 0        | 0.715277 | 0 | 0        | 0.000131 |
| 0 | 3.29E-05 | 0        | 3.29E-05 | 0        | 0.00023  | 0 | 0        | 0        |
| 0 | 0.000131 | 0        | 0        | 0        | 9.86E-05 | 0 | 0        | 0        |
| 0 | 0        | 0        | 0        | 0        | 0.544791 | 0 | 0        | 3.29E-05 |
| 0 | 0        | 0        | 3.29E-05 | 0        | 3.29E-05 | 0 | 0        | 9.86E-05 |
| 0 | 0        | 0        | 0        | 3.29E-05 | 3.29E-05 | 0 | 0        | 0        |
| 0 | 0        | 0        | 0        | 0        | 0        | 0 | 0        | 3.29E-05 |
| 0 | 0.001019 | 3.29E-05 | 6.57E-05 | 0        | 0.000164 | 0 | 0        | 0.000394 |
| 0 | 0        | 0        | 0        | 0        | 0.003419 | 0 | 0        | 0.000131 |
| 0 | 0        | 0        | 0.00046  | 0        | 3.29E-05 | 0 | 0        | 6.57E-05 |
| 0 | 0        | 0        | 0        | 0        | 0.000263 | 0 | 0        | 0.000526 |
| 0 | 6.57E-05 | 0        | 0.000131 | 0        | 0.000296 | 0 | 0        | 0.011835 |
| 0 | 0        | 0        | 0.000526 | 3.29E-05 | 0.000296 | 0 | 0        | 6.57E-05 |
| 0 | 6.57E-05 | 0        | 0.000855 | 3.29E-05 | 6.57E-05 | 0 | 0        | 0.000822 |
| 0 | 6.57E-05 | 0        | 0        | 0        | 0.000427 | 0 | 0        | 0        |
| 0 | 6.57E-05 | 0        | 0.000131 | 0        | 0.000394 | 0 | 0        | 3.29E-05 |
| 0 | 0.002729 | 0        | 0        | 0.000131 | 0.002564 | 0 | 0        | 6.57E-05 |
| 0 | 6.57E-05 | 0        | 6.57E-05 | 9.86E-05 | 6.57E-05 | 0 | 0        | 6.57E-05 |
| 0 | 0        | 0        | 0        | 0        | 0.000131 | 0 | 0        | 0        |
| 0 | 9.86E-05 | 0        | 0        | 0        | 0.00069  | 0 | 0        | 0        |
| 0 | 6.57E-05 | 0        | 0        | 0        | 0        | 0 | 0        | 0        |
| 0 | 0        | 0        | 0        | 0        | 0.000296 | 0 | 0        | 0        |
| 0 | 0        | 0        | 3.29E-05 | 0        | 0.000197 | 0 | 0        | 9.86E-05 |
| 0 | 3.29E-05 | 0        | 0        | 0        | 0.000625 | 0 | 0        | 3.29E-05 |
| 0 | 0.000362 | 0        | 0        | 0        | 0.000756 | 0 | 0        | 0.000164 |
| 0 | 0.071797 | 6.57E-05 | 0.000263 | 0        | 0.051284 | 0 | 0        | 0.004602 |
| 0 | 0.001512 | 3.29E-05 | 0        | 0        | 0.045498 | 0 | 0        | 3.29E-05 |
| 0 | 3.29E-05 | 0        | 0.000164 | 0        | 0.018837 | 0 | 0        | 3.29E-05 |
| 0 | 0        | 0        | 0        | 0        | 0.004044 | 0 | 0        | 0        |
| 0 | 0.002959 | 0        | 0        | 0        | 0.035438 | 0 | 0        | 0.001446 |
| 0 | 0.002104 | 0        | 0.000394 | 0        | 0.037838 | 0 | 0        | 0.000329 |
| 0 | 9.86E-05 | 0        | 3.29E-05 | 0        | 0.001972 | 0 | 0.000131 | 0.23173  |
| 0 | 9.86E-05 | 0        | 0.000296 | 0        | 0.054012 | 0 | 0        | 0.00069  |
| 0 | 3.29E-05 | 0        | 9.86E-05 | 6.57E-05 | 0        | 0 | 0        | 3.29E-05 |
| 0 | 0        | 0        | 0.000131 | 0        | 0.000164 | 0 | 0        | 0.000296 |
| 0 | 0        | 0        | 0        | 0        | 9.86E-05 | 0 | 0        | 0        |
| 0 | 9.86E-05 | 0        | 3.29E-05 | 0        | 0.00069  | 0 | 0        | 6.57E-05 |
| 0 | 3.29E-05 | 0        | 0        | 0        | 0.000263 | 0 | 0        | 0        |
| 0 | 0        | 0        | 0        | 0        | 0        | 0 | 0        | 0        |
| 0 | 9.86E-05 | 0        | 0        | 0        | 0.000131 | 0 | 0        | 0        |
| 0 | 6.57E-05 | 0        | 3.29E-05 | 0        | 0.000164 | 0 | 0        | 0        |
| 0 | 3.29E-05 | 3.29E-05 | 0        | 0        | 0.843453 | 0 | 0        | 0        |
| 0 | 3.29E-05 | 0        | 0        | 0        | 0.00023  | 0 | 0        | 0        |

|   |          |          |          |          |          |   |          |          |
|---|----------|----------|----------|----------|----------|---|----------|----------|
| 0 | 0        | 0        | 0        | 0        | 0        | 0 | 0        | 3.29E-05 |
| 0 | 0.057102 | 0        | 0        | 0        | 0.000131 | 0 | 0        | 0        |
| 0 | 9.86E-05 | 0        | 3.29E-05 | 0        | 0.001512 | 0 | 0        | 0        |
| 0 | 6.57E-05 | 0        | 0        | 0        | 6.57E-05 | 0 | 0        | 0        |
| 0 | 0.000131 | 9.86E-05 | 0        | 0        | 0.791216 | 0 | 0        | 0        |
| 0 | 3.29E-05 | 0        | 0.000131 | 0        | 0.000164 | 0 | 0        | 0        |
| 0 | 0        | 0        | 3.29E-05 | 0        | 0.276998 | 0 | 0        | 0        |
| 0 | 3.29E-05 | 0        | 0        | 0        | 0.000164 | 0 | 0        | 0        |
| 0 | 3.29E-05 | 0        | 3.29E-05 | 0        | 0.001841 | 0 | 0        | 0        |
| 0 | 3.29E-05 | 0        | 0        | 0        | 0.000263 | 0 | 0        | 0        |
| 0 | 0        | 0        | 0        | 0        | 0.001545 | 0 | 0        | 0.000657 |
| 0 | 0        | 0        | 0        | 0        | 6.57E-05 | 0 | 0        | 0        |
| 0 | 0        | 0        | 0        | 0        | 0.000394 | 0 | 0        | 0        |
| 0 | 3.29E-05 | 0        | 0        | 0        | 6.57E-05 | 0 | 0        | 0.000131 |
| 0 | 0        | 0        | 0        | 0        | 0.000394 | 0 | 0        | 0        |
| 0 | 0        | 0        | 9.86E-05 | 0        | 0.000131 | 0 | 0        | 0.000493 |
| 0 | 0        | 0        | 9.86E-05 | 6.57E-05 | 6.57E-05 | 0 | 0        | 6.57E-05 |
| 0 | 3.29E-05 | 0        | 0        | 0        | 9.86E-05 | 0 | 0        | 0        |
| 0 | 6.57E-05 | 0        | 3.29E-05 | 0        | 0        | 0 | 0        | 0.000131 |
| 0 | 0        | 0        | 0.000822 | 0        | 9.86E-05 | 0 | 3.29E-05 | 0.000723 |
| 0 | 0        | 0        | 0.000164 | 0        | 0        | 0 | 0        | 9.86E-05 |
| 0 | 0        | 0        | 0.000296 | 0.000164 | 0.000427 | 0 | 0        | 0.000197 |
| 0 | 3.29E-05 | 0        | 0        | 0        | 0        | 0 | 0        | 0        |
| 0 | 3.29E-05 | 0        | 0        | 0        | 0.000526 | 0 | 0        | 3.29E-05 |
| 0 | 0        | 0        | 0        | 0        | 0.369079 | 0 | 0        | 0        |
| 0 | 0.000164 | 0        | 0        | 0        | 0.004076 | 0 | 0        | 0.000131 |
| 0 | 0.004208 | 0        | 0.001282 | 0        | 0.058319 | 0 | 0        | 0.000756 |
| 0 | 0.003189 | 0        | 0        | 0.00023  | 0.063349 | 0 | 0        | 0.000625 |
| 0 | 0        | 0        | 3.29E-05 | 0        | 0.000164 | 0 | 0        | 3.29E-05 |
| 0 | 0        | 0        | 0        | 0        | 0.003353 | 0 | 0        | 6.57E-05 |
| 0 | 0.001019 | 3.29E-05 | 0.000427 | 0        | 0.094776 | 0 | 0        | 0.000362 |
| 0 | 0        | 0        | 0        | 0        | 3.29E-05 | 0 | 0        | 0        |
| 0 | 0        | 0        | 0        | 0        | 6.57E-05 | 0 | 0.000263 | 0.928532 |
| 0 | 0        | 0        | 3.29E-05 | 0        | 0        | 0 | 0.000296 | 0.523193 |
| 0 | 0        | 0        | 0        | 0        | 6.57E-05 | 0 | 0        | 3.29E-05 |
| 0 | 0        | 0        | 0        | 0        | 3.29E-05 | 0 | 0        | 0        |
| 0 | 3.29E-05 | 0        | 0        | 0        | 6.57E-05 | 0 | 0        | 6.57E-05 |
| 0 | 0        | 0        | 0        | 0        | 0        | 0 | 0        | 0        |
| 0 | 0.000131 | 0        | 0        | 0        | 0.000131 | 0 | 0        | 0        |
| 0 | 0        | 0        | 0        | 0        | 3.29E-05 | 0 | 0        | 0        |
| 0 | 0        | 0        | 0        | 0        | 6.57E-05 | 0 | 0        | 3.29E-05 |
| 0 | 3.29E-05 | 0        | 0.000329 | 0.000427 | 0        | 0 | 0        | 0        |
| 0 | 3.29E-05 | 0        | 6.57E-05 | 0        | 0.000263 | 0 | 0        | 0        |
| 0 | 6.57E-05 | 0        | 0        | 0        | 0.000296 | 0 | 0        | 6.57E-05 |
| 0 | 0        | 0        | 0        | 0        | 6.57E-05 | 0 | 0        | 0        |
| 0 | 0        | 0        | 0.000493 | 0        | 0.008876 | 0 | 0        | 0.000296 |
| 0 | 3.29E-05 | 0        | 0.000427 | 3.29E-05 | 6.57E-05 | 0 | 3.29E-05 | 9.86E-05 |

|   |          |          |          |          |          |          |          |          |
|---|----------|----------|----------|----------|----------|----------|----------|----------|
| 0 | 0        | 0        | 3.29E-05 | 0        | 0.000953 | 0        | 0        | 0        |
| 0 | 0.002268 | 0        | 0.000197 | 0        | 0.062461 | 0        | 0        | 0.000657 |
| 0 | 0        | 0        | 0.000164 | 3.29E-05 | 0.000197 | 0        | 0        | 0        |
| 0 | 3.29E-05 | 0        | 0        | 0        | 0        | 0        | 0        | 3.29E-05 |
| 0 | 0        | 0        | 9.86E-05 | 0        | 0.00503  | 0        | 0        | 0.04678  |
| 0 | 0        | 0        | 0        | 0        | 0.24008  | 0        | 3.29E-05 | 0.019067 |
| 0 | 0.001578 | 0        | 6.57E-05 | 0        | 0.031559 | 0        | 0        | 0.035471 |
| 0 | 0        | 0        | 0        | 0        | 3.29E-05 | 0        | 9.86E-05 | 0.088925 |
| 0 | 0        | 0        | 9.86E-05 | 0.00046  | 0.000131 | 0        | 3.29E-05 | 0.131332 |
| 0 | 0.003682 | 0        | 3.29E-05 | 0        | 0.025839 | 0        | 0        | 0.024754 |
| 0 | 0        | 0        | 0        | 0        | 0.000427 | 0        | 3.29E-05 | 0.149873 |
| 0 | 0.002005 | 0        | 0.000789 | 0        | 0.041027 | 0        | 0        | 0.028469 |
| 0 | 3.29E-05 | 0        | 0        | 0        | 0.000296 | 0.000197 | 0        | 0.031526 |
| 0 | 0.000197 | 0        | 0.000789 | 0        | 0.011703 | 0        | 0.000131 | 0.619284 |
| 0 | 0        | 0        | 0        | 0        | 0.000164 | 0        | 0        | 0        |
| 0 | 0        | 0        | 3.29E-05 | 0        | 0        | 0        | 0        | 0        |
| 0 | 0        | 0        | 3.29E-05 | 0        | 0        | 0        | 0        | 3.29E-05 |
| 0 | 0        | 0        | 0        | 0        | 3.29E-05 | 0        | 0        | 0        |
| 0 | 0        | 0        | 6.57E-05 | 0        | 3.29E-05 | 0        | 0        | 0        |
| 0 | 0        | 0        | 0        | 0        | 0        | 0        | 0        | 0        |
| 0 | 0        | 0        | 0        | 0        | 3.29E-05 | 0        | 0        | 0        |
| 0 | 0        | 0        | 0        | 0        | 6.57E-05 | 0        | 0        | 0        |
| 0 | 3.29E-05 | 0        | 0        | 0        | 0.000131 | 0        | 0        | 0        |
| 0 | 0        | 0        | 0        | 0        | 3.29E-05 | 0        | 6.57E-05 | 0.065453 |
| 0 | 0.000164 | 0        | 0        | 0        | 6.57E-05 | 0        | 0        | 0.000131 |
| 0 | 3.29E-05 | 0        | 0        | 0        | 0        | 0        | 0        | 6.57E-05 |
| 0 | 6.57E-05 | 0        | 0        | 0        | 3.29E-05 | 0        | 0        | 0        |
| 0 | 0        | 0        | 0        | 0        | 0        | 0        | 0        | 0        |
| 0 | 0.001611 | 0        | 0        | 0        | 0.000164 | 0        | 0        | 0        |
| 0 | 6.57E-05 | 0        | 3.29E-05 | 0        | 0        | 0        | 0        | 0        |
| 0 | 3.29E-05 | 0        | 0        | 0        | 6.57E-05 | 0        | 0        | 3.29E-05 |
| 0 | 0        | 0        | 0        | 0        | 9.86E-05 | 0        | 0        | 3.29E-05 |
| 0 | 0        | 0        | 0        | 0        | 0.509649 | 0        | 0        | 0        |
| 0 | 0        | 0        | 0        | 0        | 3.29E-05 | 0        | 0        | 0        |
| 0 | 0.000164 | 0        | 0        | 0        | 0.014498 | 0        | 0        | 6.57E-05 |
| 0 | 0        | 0        | 6.57E-05 | 0        | 3.29E-05 | 0        | 0        | 3.29E-05 |
| 0 | 0        | 0        | 0.000131 | 0        | 3.29E-05 | 0        | 0        | 0        |
| 0 | 6.57E-05 | 0        | 0.000197 | 0.000329 | 0.00092  | 0        | 0        | 3.29E-05 |
| 0 | 0.002268 | 0        | 0.009994 | 0        | 0.059634 | 0        | 0        | 0.002367 |
| 0 | 0        | 0        | 0        | 0        | 0.000657 | 0        | 0        | 0.000296 |
| 0 | 3.29E-05 | 0        | 0.000197 | 0        | 9.86E-05 | 0        | 0        | 3.29E-05 |
| 0 | 3.29E-05 | 0        | 0.000197 | 0.000131 | 0        | 0        | 0        | 3.29E-05 |
| 0 | 0.006838 | 3.29E-05 | 0.001742 | 0        | 0.055788 | 0        | 0        | 0.001446 |
| 0 | 0        | 0        | 0        | 0        | 0.000197 | 0        | 0        | 0        |
| 0 | 6.57E-05 | 0        | 0        | 0        | 0.004898 | 0        | 0        | 6.57E-05 |
| 0 | 0        | 0        | 0        | 0        | 0.115421 | 0        | 0        | 0        |
| 0 | 3.29E-05 | 0        | 0        | 0        | 0.000329 | 0        | 0        | 3.29E-05 |



|   |          |          |          |          |          |          |          |          |
|---|----------|----------|----------|----------|----------|----------|----------|----------|
| 0 | 3.29E-05 | 0        | 0.000131 | 0        | 0.00069  | 0        | 0        | 3.29E-05 |
| 0 | 6.57E-05 | 0        | 0        | 0        | 0.00023  | 0        | 0        | 3.29E-05 |
| 0 | 3.29E-05 | 0        | 0        | 0        | 9.86E-05 | 0        | 0        | 6.57E-05 |
| 0 | 0.003189 | 0        | 0        | 0        | 0.03271  | 0        | 0        | 0.000394 |
| 0 | 6.57E-05 | 3.29E-05 | 0        | 0        | 0.074756 | 0        | 0        | 0        |
| 0 | 9.86E-05 | 0        | 3.29E-05 | 0        | 0.000592 | 0        | 0        | 0.000822 |
| 0 | 0        | 6.57E-05 | 0        | 0        | 0.216838 | 0        | 0        | 0        |
| 0 | 0        | 0        | 3.29E-05 | 0        | 0.077024 | 0        | 0        | 0        |
| 0 | 0        | 0        | 6.57E-05 | 0        | 0        | 6.57E-05 | 0        | 0        |
| 0 | 3.29E-05 | 0        | 0        | 0        | 0.000131 | 0        | 0        | 0.000164 |
| 0 | 0        | 0        | 0        | 0        | 0        | 0        | 0        | 3.29E-05 |
| 0 | 0        | 0        | 0        | 0        | 0.000197 | 0        | 0        | 3.29E-05 |
| 0 | 0        | 0        | 0        | 0        | 0.000362 | 0        | 0        | 0        |
| 0 | 0        | 0        | 0        | 0        | 0        | 3.29E-05 | 0        | 0        |
| 0 | 9.86E-05 | 0        | 0        | 0        | 3.29E-05 | 0        | 0        | 0        |
| 0 | 0        | 0        | 0        | 0        | 6.57E-05 | 0        | 0        | 0        |
| 0 | 0        | 0        | 0        | 0        | 0.693317 | 0        | 0        | 0        |
| 0 | 3.29E-05 | 0        | 0        | 0        | 0.000164 | 0        | 0        | 0        |
| 0 | 3.29E-05 | 0        | 0        | 0        | 3.29E-05 | 0        | 0        | 0        |
| 0 | 3.29E-05 | 3.29E-05 | 0        | 0        | 0.400999 | 0        | 0        | 0        |
| 0 | 0        | 0        | 0        | 0        | 0.346461 | 0        | 0        | 0        |
| 0 | 0        | 3.29E-05 | 0        | 0        | 0.418653 | 0        | 0        | 3.29E-05 |
| 0 | 0        | 0        | 0        | 0        | 0.435221 | 0        | 0        | 0        |
| 0 | 0.000131 | 0        | 0        | 0        | 0.000131 | 0        | 0        | 6.57E-05 |
| 0 | 0.000131 | 0        | 0        | 0        | 6.57E-05 | 0        | 0        | 0        |
| 0 | 6.57E-05 | 6.57E-05 | 0        | 0        | 9.86E-05 | 0        | 0        | 0        |
| 0 | 0        | 0        | 0        | 0        | 0        | 0        | 0        | 0        |
| 0 | 3.29E-05 | 0        | 0        | 0        | 3.29E-05 | 0        | 0        | 3.29E-05 |
| 0 | 3.29E-05 | 9.86E-05 | 0        | 0        | 0.469148 | 0        | 0        | 0        |
| 0 | 6.57E-05 | 3.29E-05 | 0        | 0        | 0.449292 | 0        | 0        | 0        |
| 0 | 0        | 0        | 0        | 0        | 0.620467 | 0        | 0        | 0        |
| 0 | 0        | 0        | 0        | 0        | 0.001742 | 0        | 0        | 3.29E-05 |
| 0 | 0        | 0        | 0        | 3.29E-05 | 6.57E-05 | 0        | 0        | 0        |
| 0 | 3.29E-05 | 0        | 0        | 0        | 0.00286  | 0        | 0        | 3.29E-05 |
| 0 | 0        | 6.57E-05 | 0        | 0        | 0.441993 | 0        | 0        | 0        |
| 0 | 3.29E-05 | 3.29E-05 | 0        | 0        | 0.573918 | 0        | 0        | 0        |
| 0 | 9.86E-05 | 0        | 0        | 0        | 0.001282 | 0        | 0        | 0.005523 |
| 0 | 3.29E-05 | 6.57E-05 | 0        | 3.29E-05 | 0.860318 | 0        | 0        | 0        |
| 0 | 0        | 0        | 0        | 0        | 3.29E-05 | 0        | 0        | 0        |
| 0 | 0        | 0        | 0.000296 | 0        | 0        | 0        | 6.57E-05 | 0.310267 |
| 0 | 0.000131 | 6.57E-05 | 0.004076 | 0        | 0        | 0        | 0        | 0.006443 |
| 0 | 0        | 0        | 0.00023  | 0        | 0.050593 | 0        | 0        | 0.00023  |
| 0 | 6.57E-05 | 0        | 0.001282 | 0        | 0.000526 | 0        | 0        | 0.000822 |
| 0 | 3.29E-05 | 0        | 6.57E-05 | 0.000131 | 3.29E-05 | 0        | 0        | 0        |
| 0 | 0        | 0        | 0        | 0        | 0.000427 | 0        | 0        | 0.000131 |
| 0 | 6.57E-05 | 0        | 0.000164 | 0        | 0.000263 | 0        | 0        | 0.00023  |
| 0 | 0        | 0        | 0        | 0        | 0.000592 | 0        | 0        | 3.29E-05 |

|   |          |          |          |          |          |   |          |          |
|---|----------|----------|----------|----------|----------|---|----------|----------|
| 0 | 9.86E-05 | 0        | 0        | 0        | 0.008449 | 0 | 0        | 0.000362 |
| 0 | 0        | 0        | 0        | 0        | 0        | 0 | 0        | 0        |
| 0 | 0        | 0        | 0        | 0        | 6.57E-05 | 0 | 0        | 0.000164 |
| 0 | 0        | 0        | 0        | 0        | 0        | 0 | 0        | 0        |
| 0 | 0        | 0        | 0        | 0        | 0.000329 | 0 | 0        | 6.57E-05 |
| 0 | 0        | 0        | 0        | 0        | 3.29E-05 | 0 | 0        | 3.29E-05 |
| 0 | 6.57E-05 | 0        | 6.57E-05 | 0        | 0.000296 | 0 | 0        | 6.57E-05 |
| 0 | 0.000197 | 0        | 9.86E-05 | 0        | 0.000427 | 0 | 0        | 3.29E-05 |
| 0 | 3.29E-05 | 0        | 0        | 0        | 0.000625 | 0 | 0        | 0        |
| 0 | 3.29E-05 | 0        | 0.000164 | 0        | 0        | 0 | 0        | 0.00023  |
| 0 | 0        | 0        | 0        | 0        | 0        | 0 | 0        | 3.29E-05 |
| 0 | 0        | 0        | 0        | 0        | 0        | 0 | 0        | 0        |
| 0 | 0        | 0        | 0        | 0        | 0.004142 | 0 | 0        | 0        |
| 0 | 3.29E-05 | 0        | 0        | 0        | 9.86E-05 | 0 | 0        | 3.29E-05 |
| 0 | 3.29E-05 | 0        | 0        | 0        | 0        | 0 | 0        | 0.000625 |
| 0 | 0        | 0        | 0        | 0        | 0.00069  | 0 | 0        | 0        |
| 0 | 0        | 0        | 9.86E-05 | 0        | 3.29E-05 | 0 | 0        | 0        |
| 0 | 3.29E-05 | 0        | 0.000164 | 0        | 0.000625 | 0 | 0        | 6.57E-05 |
| 0 | 3.29E-05 | 0        | 3.29E-05 | 0        | 6.57E-05 | 0 | 0        | 9.86E-05 |
| 0 | 0.000131 | 0        | 9.86E-05 | 3.29E-05 | 0.000559 | 0 | 0        | 0.000427 |
| 0 | 0        | 0        | 0.000131 | 0        | 0.000164 | 0 | 0        | 0.021237 |
| 0 | 3.29E-05 | 0        | 0        | 0        | 0.000197 | 0 | 6.57E-05 | 0.183241 |
| 0 | 3.29E-05 | 0        | 3.29E-05 | 9.86E-05 | 6.57E-05 | 0 | 0.000131 | 0.539597 |
| 0 | 0        | 0        | 0.000131 | 0        | 0.000296 | 0 | 0        | 0.022486 |
| 0 | 0        | 0        | 3.29E-05 | 0        | 6.57E-05 | 0 | 3.29E-05 | 0.022289 |
| 0 | 9.86E-05 | 0        | 0        | 0        | 9.86E-05 | 0 | 0        | 0.013413 |
| 0 | 0        | 0        | 0        | 0        | 0.000164 | 0 | 0        | 0.015286 |
| 0 | 0        | 0        | 0        | 0        | 0        | 0 | 0        | 0        |
| 0 | 0        | 0        | 0        | 0        | 0        | 0 | 0        | 0        |
| 0 | 0        | 0        | 0        | 0        | 0.000329 | 0 | 0        | 0        |
| 0 | 0        | 0        | 0        | 0        | 0        | 0 | 0        | 0        |
| 0 | 6.57E-05 | 0        | 0        | 0        | 0.001151 | 0 | 0        | 0        |
| 0 | 0        | 0        | 0        | 0        | 3.29E-05 | 0 | 0        | 0.000164 |
| 0 | 0.000329 | 0        | 0        | 0        | 9.86E-05 | 0 | 0        | 3.29E-05 |
| 0 | 0        | 3.29E-05 | 0        | 0        | 0        | 0 | 0        | 6.57E-05 |
| 0 | 0        | 0        | 0        | 0        | 0.000131 | 0 | 0        | 3.29E-05 |
| 0 | 0.004438 | 0        | 3.29E-05 | 0        | 0.037641 | 0 | 0        | 0.003419 |
| 0 | 0.009073 | 9.86E-05 | 0.000164 | 0        | 0.1026   | 0 | 0        | 0.000526 |
| 0 | 0.003353 | 0        | 0        | 0        | 0.024689 | 0 | 0        | 6.57E-05 |
| 0 | 0.00023  | 3.29E-05 | 9.86E-05 | 0.000394 | 0.002334 | 0 | 0        | 0.000131 |
| 0 | 0        | 0        | 3.29E-05 | 0        | 0.000362 | 0 | 0        | 0        |
| 0 | 0        | 0        | 6.57E-05 | 0        | 6.57E-05 | 0 | 0        | 6.57E-05 |
| 0 | 0.000526 | 0        | 0        | 0.000164 | 0.06154  | 0 | 0        | 0.001446 |
| 0 | 0.00069  | 0        | 0        | 0        | 0.153095 | 0 | 0        | 0.000625 |
| 0 | 0        | 0        | 0        | 0        | 3.29E-05 | 0 | 0        | 3.29E-05 |
| 0 | 0.00023  | 0        | 0.000427 | 9.86E-05 | 0.011046 | 0 | 3.29E-05 | 0.001019 |
| 0 | 0        | 0        | 0.000953 | 0.000131 | 0        | 0 | 3.29E-05 | 0        |



|   |          |          |          |          |          |          |          |          |
|---|----------|----------|----------|----------|----------|----------|----------|----------|
| 0 | 0        | 0        | 3.29E-05 | 0.000197 | 0        | 0        | 0        | 0        |
| 0 | 0.000164 | 0        | 6.57E-05 | 0.000131 | 0.000164 | 0        | 0        | 0        |
| 0 | 3.29E-05 | 0        | 0        | 0        | 6.57E-05 | 0        | 0        | 3.29E-05 |
| 0 | 0        | 0        | 0        | 6.57E-05 | 0.000329 | 0        | 0        | 0        |
| 0 | 0        | 0        | 0        | 0.000197 | 0        | 0        | 0        | 3.29E-05 |
| 0 | 0        | 0        | 0        | 0        | 9.86E-05 | 0        | 0        | 3.29E-05 |
| 0 | 0        | 0        | 0        | 0        | 0.000131 | 0        | 0        | 0        |
| 0 | 0        | 0        | 0        | 0        | 6.57E-05 | 0        | 0        | 3.29E-05 |
| 0 | 0        | 0        | 3.29E-05 | 0        | 0.000197 | 0        | 0        | 0        |
| 0 | 9.86E-05 | 0        | 0        | 0        | 0.000164 | 0        | 0        | 6.57E-05 |
| 0 | 0        | 0        | 0        | 0        | 0        | 0        | 0        | 0        |
| 0 | 0        | 0        | 0        | 0        | 0        | 0        | 0        | 0        |
| 0 | 0        | 0        | 0.000164 | 6.57E-05 | 6.57E-05 | 0        | 0        | 0        |
| 0 | 0        | 0        | 0.000164 | 0        | 6.57E-05 | 0        | 0        | 0        |
| 0 | 0        | 0        | 0        | 0        | 0.068017 | 0        | 0        | 0        |
| 0 | 0.001578 | 0        | 0.000362 | 0        | 0.029159 | 0        | 0        | 0.000362 |
| 0 | 0        | 0        | 0        | 0        | 0.000197 | 0        | 0        | 0        |
| 0 | 3.29E-05 | 0        | 3.29E-05 | 0        | 0.000526 | 0        | 0        | 6.57E-05 |
| 0 | 0        | 0        | 3.29E-05 | 9.86E-05 | 6.57E-05 | 0        | 0        | 0        |
| 0 | 0        | 0        | 0.000263 | 6.57E-05 | 3.29E-05 | 0        | 0        | 0        |
| 0 | 0.000263 | 0        | 0.000131 | 0.000394 | 0.000164 | 0        | 0        | 3.29E-05 |
| 0 | 0        | 0        | 0        | 3.29E-05 | 0.02265  | 0        | 0        | 3.29E-05 |
| 0 | 3.29E-05 | 0        | 3.29E-05 | 0        | 0        | 3.29E-05 | 0        | 3.29E-05 |
| 0 | 0        | 0        | 0        | 0        | 9.86E-05 | 0        | 0        | 6.57E-05 |
| 0 | 9.86E-05 | 0        | 0        | 0        | 0.000164 | 0        | 0        | 3.29E-05 |
| 0 | 6.57E-05 | 0        | 0        | 0        | 0.000329 | 0        | 0        | 9.86E-05 |
| 0 | 3.29E-05 | 0        | 3.29E-05 | 0        | 9.86E-05 | 0        | 0        | 0        |
| 0 | 3.29E-05 | 3.29E-05 | 0        | 0        | 0.596798 | 0        | 0        | 0        |
| 0 | 0        | 0        | 0        | 0        | 0.00069  | 0        | 0        | 0        |
| 0 | 0        | 0        | 0        | 0        | 3.29E-05 | 0        | 0        | 0        |
| 0 | 0        | 0        | 0        | 0        | 6.57E-05 | 0        | 0        | 0        |
| 0 | 0        | 0        | 0        | 0        | 3.29E-05 | 0        | 0        | 0        |
| 0 | 0        | 0        | 0        | 0        | 0.000197 | 0        | 0        | 0        |
| 0 | 3.29E-05 | 0        | 0        | 0        | 9.86E-05 | 0        | 6.57E-05 | 0.322562 |
| 0 | 0        | 0        | 0        | 0        | 0.000296 | 0        | 0        | 0        |
| 0 | 0.000493 | 0        | 0        | 0        | 0.00046  | 0        | 0        | 0.000131 |
| 0 | 3.29E-05 | 0        | 0.000131 | 0        | 0.000131 | 0        | 0        | 0.000164 |
| 0 | 3.29E-05 | 0        | 0.000164 | 0        | 0.000164 | 0        | 0        | 0        |
| 0 | 3.29E-05 | 0        | 0        | 0        | 0.000592 | 0        | 0.000164 | 0.565107 |
| 0 | 0.001578 | 0        | 0        | 0        | 0.069989 | 0        | 0.000164 | 0.349946 |
| 0 | 6.57E-05 | 0        | 0        | 0        | 0        | 0        | 0        | 0.056346 |
| 0 | 6.57E-05 | 0        | 0        | 0        | 9.86E-05 | 0        | 0        | 0.001118 |
| 0 | 3.29E-05 | 0        | 0        | 0        | 0.001151 | 0        | 0        | 0        |
| 0 | 3.29E-05 | 0        | 0        | 0        | 3.29E-05 | 0        | 0        | 0.001972 |
| 0 | 3.29E-05 | 0        | 0.000164 | 9.86E-05 | 0.000592 | 0.000427 | 0        | 9.86E-05 |
| 0 | 0        | 0        | 0        | 0        | 3.29E-05 | 0        | 0        | 0.000296 |

|   |          |          |          |          |          |          |          |          |
|---|----------|----------|----------|----------|----------|----------|----------|----------|
| 0 | 0        | 0        | 3.29E-05 | 0.000131 | 0.000526 | 0        | 0        | 0        |
| 0 | 0.001545 | 0        | 0        | 0        | 0        | 0        | 0        | 0.000362 |
| 0 | 3.29E-05 | 0        | 0        | 0        | 0.000296 | 0        | 0        | 6.57E-05 |
| 0 | 6.57E-05 | 0        | 0        | 0        | 0.001348 | 0        | 0        | 3.29E-05 |
| 0 | 0        | 0        | 0        | 0        | 0        | 0        | 0        | 3.29E-05 |
| 0 | 0        | 0        | 0        | 0        | 6.57E-05 | 0        | 0        | 0        |
| 0 | 0        | 0        | 0        | 0        | 0.000362 | 0        | 0        | 0        |
| 0 | 0.00309  | 0        | 0        | 0.000263 | 0.001019 | 0        | 0        | 6.57E-05 |
| 0 | 0        | 0        | 0        | 3.29E-05 | 0.000723 | 0        | 0        | 3.29E-05 |
| 0 | 0.00286  | 0        | 0        | 0        | 0.05822  | 0        | 0        | 0.000394 |
| 0 | 0        | 0        | 6.57E-05 | 0.000263 | 0.000394 | 0        | 0        | 3.29E-05 |
| 0 | 3.29E-05 | 0        | 0        | 0        | 0.00023  | 0        | 0        | 3.29E-05 |
| 0 | 0.000329 | 0        | 0.000164 | 0.000131 | 0.004076 | 0        | 0        | 0.000296 |
| 0 | 0.00069  | 0        | 0        | 0        | 0.004241 | 0        | 0        | 0.000329 |
| 0 | 0.000263 | 0        | 0.000131 | 0.000526 | 0.001315 | 0        | 0        | 0.008975 |
| 0 | 6.57E-05 | 0        | 3.29E-05 | 0.000855 | 0.00023  | 0        | 0        | 6.57E-05 |
| 0 | 0        | 0        | 0.000131 | 3.29E-05 | 3.29E-05 | 6.57E-05 | 0        | 3.29E-05 |
| 0 | 0.000263 | 0.000526 | 0.002992 | 0        | 0.001907 | 0        | 0        | 0.002794 |
| 0 | 0        | 0        | 0        | 6.57E-05 | 0.063677 | 0        | 0        | 0        |
| 0 | 0        | 0        | 0        | 0        | 0        | 0        | 0        | 6.57E-05 |
| 0 | 3.29E-05 | 0        | 3.29E-05 | 0        | 0.000723 | 0        | 0        | 3.29E-05 |
| 0 | 9.86E-05 | 0        | 0        | 0        | 0.000592 | 0        | 0        | 0.000131 |
| 0 | 3.29E-05 | 0        | 0        | 0        | 0.000362 | 0        | 0        | 0        |
| 0 | 0        | 0        | 0        | 0        | 6.57E-05 | 0        | 0        | 0        |
| 0 | 3.29E-05 | 0        | 0        | 0        | 9.86E-05 | 0        | 0        | 0        |
| 0 | 0        | 0        | 0        | 0        | 0.017555 | 0        | 0        | 9.86E-05 |
| 0 | 3.29E-05 | 0        | 0        | 0        | 6.57E-05 | 0        | 0        | 0        |
| 0 | 0        | 0        | 0        | 0        | 9.86E-05 | 0        | 0        | 0        |
| 0 | 0.000131 | 0        | 0        | 0        | 0.000427 | 0        | 0        | 0        |
| 0 | 0        | 0        | 0        | 0        | 0        | 0        | 0        | 0        |
| 0 | 0        | 0        | 0        | 0        | 0        | 0        | 0        | 0        |
| 0 | 0        | 3.29E-05 | 0        | 0        | 0.230218 | 0        | 0        | 0        |
| 0 | 9.86E-05 | 0        | 0        | 0        | 0.050955 | 0        | 0        | 0        |
| 0 | 6.57E-05 | 0        | 0        | 0        | 9.86E-05 | 0        | 0        | 3.29E-05 |
| 0 | 0        | 0        | 0        | 6.57E-05 | 0.00503  | 0        | 0        | 0        |
| 0 | 3.29E-05 | 0        | 3.29E-05 | 0        | 0        | 0        | 0        | 0.007002 |
| 0 | 3.29E-05 | 3.29E-05 | 0        | 0        | 0.27016  | 0        | 0        | 0        |
| 0 | 0.003156 | 3.29E-05 | 0.000822 | 0        | 0.038594 | 0        | 0        | 0.000131 |
| 0 | 0        | 0        | 3.29E-05 | 0        | 0.001479 | 0        | 0.035438 | 0        |
| 0 | 0        | 0        | 0        | 0        | 0.000131 | 0        | 0        | 3.29E-05 |
| 0 | 6.57E-05 | 0        | 0        | 3.29E-05 | 6.57E-05 | 0        | 0        | 9.86E-05 |
| 0 | 0        | 0        | 6.57E-05 | 3.29E-05 | 0.003287 | 0        | 0        | 6.57E-05 |
| 0 | 0.003123 | 0        | 0.001183 | 0        | 0.045629 | 0        | 0        | 0.000625 |
| 0 | 0.000164 | 0        | 0.000164 | 0        | 0.001052 | 0        | 0        | 0.000197 |
| 0 | 3.29E-05 | 0        | 6.57E-05 | 0        | 0.000394 | 0        | 0        | 0        |
| 0 | 0        | 0        | 0        | 0        | 6.57E-05 | 0        | 0        | 0        |
| 0 | 0        | 0        | 0        | 0        | 6.57E-05 | 0        | 0        | 0        |

|   |          |          |          |   |          |   |          |          |
|---|----------|----------|----------|---|----------|---|----------|----------|
| 0 | 3.29E-05 | 0        | 0        | 0 | 3.29E-05 | 0 | 0        | 0        |
| 0 | 0.000131 | 0        | 0        | 0 | 0        | 0 | 0        | 0        |
| 0 | 0        | 0        | 0        | 0 | 0        | 0 | 0        | 0        |
| 0 | 0        | 0        | 0        | 0 | 3.29E-05 | 0 | 0        | 0        |
| 0 | 0        | 0        | 0        | 0 | 0.000329 | 0 | 0        | 0        |
| 0 | 0.000197 | 0        | 3.29E-05 | 0 | 0        | 0 | 0        | 0        |
| 0 | 3.29E-05 | 0        | 0        | 0 | 0.000296 | 0 | 0        | 0        |
| 0 | 0        | 0        | 0        | 0 | 3.29E-05 | 0 | 0        | 0        |
| 0 | 0        | 0        | 0        | 0 | 0.000164 | 0 | 3.29E-05 | 0        |
| 0 | 0        | 0        | 0        | 0 | 0.000131 | 0 | 0        | 0        |
| 0 | 0.000592 | 0        | 3.29E-05 | 0 | 0.01121  | 0 | 0        | 0.012394 |
| 0 | 0        | 0        | 0        | 0 | 3.29E-05 | 0 | 0        | 0        |
| 0 | 0        | 0        | 0        | 0 | 3.29E-05 | 0 | 0        | 3.29E-05 |
| 0 | 3.29E-05 | 0        | 0        | 0 | 0        | 0 | 0        | 6.57E-05 |
| 0 | 3.29E-05 | 0        | 0        | 0 | 3.29E-05 | 0 | 0        | 0        |
| 0 | 3.29E-05 | 0        | 0        | 0 | 0        | 0 | 0        | 0        |
| 0 | 3.29E-05 | 0        | 0        | 0 | 6.57E-05 | 0 | 0        | 0        |
| 0 | 3.29E-05 | 3.29E-05 | 0        | 0 | 0.000493 | 0 | 0        | 0        |
| 0 | 0        | 0        | 0        | 0 | 0.051645 | 0 | 0        | 0        |
| 0 | 3.29E-05 | 0        | 0        | 0 | 0.001151 | 0 | 0        | 3.29E-05 |
| 0 | 6.57E-05 | 0        | 0        | 0 | 0        | 0 | 0        | 9.86E-05 |
| 0 | 0        | 0        | 0        | 0 | 0        | 0 | 0        | 0        |
| 0 | 3.29E-05 | 0        | 3.29E-05 | 0 | 0        | 0 | 0        | 0        |
| 0 | 0        | 0        | 0        | 0 | 0        | 0 | 0        | 0        |
| 0 | 3.29E-05 | 0        | 0        | 0 | 3.29E-05 | 0 | 0        | 0        |
| 0 | 3.29E-05 | 0        | 0        | 0 | 0.000131 | 0 | 0        | 0        |
| 0 | 6.57E-05 | 0        | 0        | 0 | 0.001216 | 0 | 0        | 3.29E-05 |
| 0 | 3.29E-05 | 0        | 0        | 0 | 6.57E-05 | 0 | 0        | 3.29E-05 |
| 0 | 3.29E-05 | 0        | 0        | 0 | 3.29E-05 | 0 | 0        | 0        |
| 0 | 6.57E-05 | 0        | 0        | 0 | 3.29E-05 | 0 | 0        | 0.00023  |
| 0 | 3.29E-05 | 0        | 0        | 0 | 9.86E-05 | 0 | 0        | 0        |
| 0 | 9.86E-05 | 0        | 0        | 0 | 3.29E-05 | 0 | 0        | 0.000131 |
| 0 | 6.57E-05 | 0        | 0        | 0 | 0.000164 | 0 | 0        | 0        |
| 0 | 0.000197 | 0        | 6.57E-05 | 0 | 0.00046  | 0 | 0        | 6.57E-05 |
| 0 | 0.000164 | 0        | 0        | 0 | 6.57E-05 | 0 | 0        | 3.29E-05 |
| 0 | 0        | 0        | 0        | 0 | 0        | 0 | 0        | 0        |
| 0 | 0        | 0        | 0        | 0 | 3.29E-05 | 0 | 0        | 6.57E-05 |
| 0 | 0.000164 | 0        | 9.86E-05 | 0 | 0.000953 | 0 | 0        | 6.57E-05 |
| 0 | 3.29E-05 | 0        | 0        | 0 | 0.000362 | 0 | 0        | 0        |
| 0 | 0        | 0        | 0        | 0 | 0.000526 | 0 | 0        | 0        |
| 0 | 0        | 0        | 0        | 0 | 6.57E-05 | 0 | 0        | 0        |
| 0 | 0        | 0        | 0        | 0 | 3.29E-05 | 0 | 0        | 0        |
| 0 | 0        | 0        | 0        | 0 | 0        | 0 | 0        | 0        |
| 0 | 3.29E-05 | 0        | 0        | 0 | 9.86E-05 | 0 | 0        | 0        |
| 0 | 0        | 0        | 0.000263 | 0 | 0.004767 | 0 | 0        | 0        |
| 0 | 0        | 0        | 0        | 0 | 0.028633 | 0 | 0        | 0        |
| 0 | 0        | 0        | 0        | 0 | 0.243433 | 0 | 0        | 3.29E-05 |

|          |          |          |          |          |          |   |   |          |
|----------|----------|----------|----------|----------|----------|---|---|----------|
| 0        | 0.005884 | 0        | 0.008942 | 0        | 0.025642 | 0 | 0 | 0.003649 |
| 0        | 0        | 0        | 0        | 0        | 0.031    | 0 | 0 | 0        |
| 0        | 9.86E-05 | 0        | 0        | 3.29E-05 | 0.000164 | 0 | 0 | 3.29E-05 |
| 0        | 3.29E-05 | 0        | 6.57E-05 | 0        | 0.000329 | 0 | 0 | 0        |
| 0        | 0        | 6.57E-05 | 0        | 0        | 0.264144 | 0 | 0 | 3.29E-05 |
| 0        | 0.000164 | 0        | 0.00023  | 0        | 0.003682 | 0 | 0 | 0.000164 |
| 0        | 0        | 3.29E-05 | 0        | 0        | 0.273579 | 0 | 0 | 0        |
| 0        | 0        | 0        | 3.29E-05 | 0        | 0.000723 | 0 | 0 | 0.000197 |
| 0        | 3.29E-05 | 0        | 0.000131 | 0        | 0.001709 | 0 | 0 | 3.29E-05 |
| 0        | 0        | 0        | 0.000394 | 0        | 0        | 0 | 0 | 3.29E-05 |
| 0        | 3.29E-05 | 0        | 0        | 0        | 0.00046  | 0 | 0 | 6.57E-05 |
| 0        | 0        | 0        | 0        | 3.29E-05 | 6.57E-05 | 0 | 0 | 0        |
| 0        | 0.312798 | 0        | 0        | 0        | 0.000164 | 0 | 0 | 3.29E-05 |
| 0        | 0.472435 | 0        | 0        | 0        | 0.001677 | 0 | 0 | 0        |
| 0        | 0.023571 | 0        | 0        | 0        | 6.57E-05 | 0 | 0 | 6.57E-05 |
| 3.29E-05 | 0.238962 | 0        | 0        | 0        | 6.57E-05 | 0 | 0 | 0        |
| 0        | 0.14846  | 0        | 0        | 0        | 0        | 0 | 0 | 0        |
| 0        | 0.023406 | 0        | 0        | 0        | 0        | 0 | 0 | 0        |
| 0        | 0.389198 | 0        | 0        | 0        | 0        | 0 | 0 | 0        |
| 0        | 0.76324  | 0        | 3.29E-05 | 0        | 0.000263 | 0 | 0 | 0        |
| 0        | 0.46346  | 0        | 0        | 0        | 0        | 0 | 0 | 9.86E-05 |
| 0        | 0.167395 | 0        | 6.57E-05 | 0        | 0.290772 | 0 | 0 | 0        |
| 0        | 0.803215 | 0        | 0        | 0        | 9.86E-05 | 0 | 0 | 0        |





























|   |   |   |   |   |   |          |   |   |
|---|---|---|---|---|---|----------|---|---|
| 0 | 0 | 0 | 0 | 0 | 0 | 0.00069  | 0 | 0 |
| 0 | 0 | 0 | 0 | 0 | 0 | 0        | 0 | 0 |
| 0 | 0 | 0 | 0 | 0 | 0 | 0        | 0 | 0 |
| 0 | 0 | 0 | 0 | 0 | 0 | 0        | 0 | 0 |
| 0 | 0 | 0 | 0 | 0 | 0 | 0        | 0 | 0 |
| 0 | 0 | 0 | 0 | 0 | 0 | 0        | 0 | 0 |
| 0 | 0 | 0 | 0 | 0 | 0 | 0        | 0 | 0 |
| 0 | 0 | 0 | 0 | 0 | 0 | 0        | 0 | 0 |
| 0 | 0 | 0 | 0 | 0 | 0 | 0        | 0 | 0 |
| 0 | 0 | 0 | 0 | 0 | 0 | 0.000131 | 0 | 0 |
| 0 | 0 | 0 | 0 | 0 | 0 | 0.000197 | 0 | 0 |
| 0 | 0 | 0 | 0 | 0 | 0 | 0        | 0 | 0 |
| 0 | 0 | 0 | 0 | 0 | 0 | 0        | 0 | 0 |
| 0 | 0 | 0 | 0 | 0 | 0 | 0        | 0 | 0 |
| 0 | 0 | 0 | 0 | 0 | 0 | 0        | 0 | 0 |
| 0 | 0 | 0 | 0 | 0 | 0 | 0        | 0 | 0 |
| 0 | 0 | 0 | 0 | 0 | 0 | 0        | 0 | 0 |
| 0 | 0 | 0 | 0 | 0 | 0 | 0        | 0 | 0 |
| 0 | 0 | 0 | 0 | 0 | 0 | 0        | 0 | 0 |
| 0 | 0 | 0 | 0 | 0 | 0 | 0        | 0 | 0 |
| 0 | 0 | 0 | 0 | 0 | 0 | 0        | 0 | 0 |
| 0 | 0 | 0 | 0 | 0 | 0 | 0        | 0 | 0 |
| 0 | 0 | 0 | 0 | 0 | 0 | 0.000131 | 0 | 0 |













|   |   |          |          |   |   |          |          |          |
|---|---|----------|----------|---|---|----------|----------|----------|
| 0 | 0 | 0        | 0        | 0 | 0 | 0        | 0        | 0.001644 |
| 0 | 0 | 0        | 0.000197 | 0 | 0 | 0        | 0        | 0.001348 |
| 0 | 0 | 0        | 0        | 0 | 0 | 0        | 0        | 0.000723 |
| 0 | 0 | 0        | 0        | 0 | 0 | 0        | 0        | 0        |
| 0 | 0 | 0        | 0        | 0 | 0 | 0        | 0        | 0        |
| 0 | 0 | 0        | 6.57E-05 | 0 | 0 | 0        | 0        | 0        |
| 0 | 0 | 0        | 0.00092  | 0 | 0 | 0        | 0        | 0        |
| 0 | 0 | 0        | 0        | 0 | 0 | 0        | 0        | 0        |
| 0 | 0 | 0        | 0        | 0 | 0 | 0        | 0        | 0        |
| 0 | 0 | 0        | 0        | 0 | 0 | 0        | 0        | 0.001479 |
| 0 | 0 | 0        | 0.000756 | 0 | 0 | 0        | 0        | 0        |
| 0 | 0 | 0        | 9.86E-05 | 0 | 0 | 0        | 0        | 0.01292  |
| 0 | 0 | 0        | 0.001972 | 0 | 0 | 0        | 0        | 0        |
| 0 | 0 | 0        | 0.000296 | 0 | 0 | 0        | 0        | 9.86E-05 |
| 0 | 0 | 0        | 0        | 0 | 0 | 0        | 0        | 0.00069  |
| 0 | 0 | 0        | 0        | 0 | 0 | 0        | 0        | 0.00046  |
| 0 | 0 | 0        | 0        | 0 | 0 | 0        | 0        | 0.00023  |
| 0 | 0 | 0        | 0        | 0 | 0 | 0        | 0        | 0.000362 |
| 0 | 0 | 0        | 0        | 0 | 0 | 0        | 0        | 0.000427 |
| 0 | 0 | 0        | 0        | 0 | 0 | 0        | 0        | 0.001183 |
| 0 | 0 | 0        | 0        | 0 | 0 | 0        | 0        | 0.001085 |
| 0 | 0 | 0        | 0        | 0 | 0 | 0        | 0        | 0.000427 |
| 0 | 0 | 0        | 0        | 0 | 0 | 0        | 0        | 0        |
| 0 | 0 | 0        | 0        | 0 | 0 | 0        | 0        | 6.57E-05 |
| 0 | 0 | 0        | 0        | 0 | 0 | 0        | 0        | 9.86E-05 |
| 0 | 0 | 3.29E-05 | 0        | 0 | 0 | 0        | 0        | 0        |
| 0 | 0 | 0        | 0        | 0 | 0 | 0        | 0        | 0        |
| 0 | 0 | 0        | 0        | 0 | 0 | 0        | 0        | 0        |
| 0 | 0 | 0        | 0        | 0 | 0 | 0        | 0        | 0.000625 |
| 0 | 0 | 0        | 0        | 0 | 0 | 0        | 0        | 0        |
| 0 | 0 | 0        | 0.419705 | 0 | 0 | 0        | 0        | 6.57E-05 |
| 0 | 0 | 0        | 0.40524  | 0 | 0 | 0        | 0        | 3.29E-05 |
| 0 | 0 | 0        | 0        | 0 | 0 | 0        | 0        | 3.29E-05 |
| 0 | 0 | 0        | 0        | 0 | 0 | 0        | 0        | 0        |
| 0 | 0 | 0        | 0        | 0 | 0 | 0        | 0        | 0.000362 |
| 0 | 0 | 0        | 0        | 0 | 0 | 0        | 0        | 0.001151 |
| 0 | 0 | 0        | 0        | 0 | 0 | 0        | 0        | 0        |
| 0 | 0 | 0        | 0        | 0 | 0 | 0        | 0        | 3.29E-05 |
| 0 | 0 | 0        | 0.000592 | 0 | 0 | 0        | 0        | 0.002301 |
| 0 | 0 | 0        | 0        | 0 | 0 | 0        | 0        | 3.29E-05 |
| 0 | 0 | 0        | 0        | 0 | 0 | 0        | 0        | 0        |
| 0 | 0 | 0        | 0        | 0 | 0 | 0        | 0        | 0        |
| 0 | 0 | 0        | 0        | 0 | 0 | 0        | 0        | 0.006443 |
| 0 | 0 | 0        | 0        | 0 | 0 | 0.000296 | 3.29E-05 | 0.003057 |
| 0 | 0 | 0        | 0        | 0 | 0 | 0        | 0        | 0.003583 |
| 0 | 0 | 0        | 0        | 0 | 0 | 0.000197 | 0        | 0.005128 |
| 0 | 0 | 0        | 0        | 0 | 0 | 0.000197 | 0        | 0.00217  |















|   |          |   |          |   |          |          |          |          |
|---|----------|---|----------|---|----------|----------|----------|----------|
| 0 | 0        | 0 | 0.000953 | 0 | 0        | 0        | 0        | 0.004109 |
| 0 | 0        | 0 | 0        | 0 | 0        | 0        | 0        | 0.00023  |
| 0 | 0        | 0 | 0        | 0 | 0        | 0        | 0        | 0        |
| 0 | 9.86E-05 | 0 | 0        | 0 | 0        | 0        | 0        | 0        |
| 0 | 0        | 0 | 3.29E-05 | 0 | 0        | 0        | 0        | 0.000394 |
| 0 | 0        | 0 | 0        | 0 | 0        | 0        | 0        | 0.005161 |
| 0 | 0        | 0 | 0        | 0 | 0        | 0        | 0        | 0.039449 |
| 0 | 0        | 0 | 0        | 0 | 0        | 0        | 6.57E-05 | 0.000822 |
| 0 | 0        | 0 | 0        | 0 | 0        | 0        | 0        | 0        |
| 0 | 0        | 0 | 3.29E-05 | 0 | 0        | 0        | 0        | 0.000986 |
| 0 | 0        | 0 | 0        | 0 | 0        | 0        | 0        | 3.29E-05 |
| 0 | 0        | 0 | 0        | 0 | 0        | 0        | 0        | 0.001249 |
| 0 | 0        | 0 | 0        | 0 | 0        | 0        | 0        | 3.29E-05 |
| 0 | 0        | 0 | 0        | 0 | 0        | 0.000394 | 0        | 0.000789 |
| 0 | 0        | 0 | 0        | 0 | 0        | 0        | 0.000131 | 0.000592 |
| 0 | 0        | 0 | 0        | 0 | 0        | 0        | 9.86E-05 | 0.001479 |
| 0 | 0        | 0 | 0        | 0 | 0        | 0        | 0        | 0.000263 |
| 0 | 0        | 0 | 0        | 0 | 0        | 0.000723 | 3.29E-05 | 0.002498 |
| 0 | 0        | 0 | 0        | 0 | 0        | 0        | 0        | 0.000131 |
| 0 | 0        | 0 | 0        | 0 | 0        | 0        | 0        | 0.000329 |
| 0 | 0        | 0 | 0        | 0 | 6.57E-05 | 0        | 0.001085 | 0.008777 |
| 0 | 0        | 0 | 0        | 0 | 0        | 0.002663 | 3.29E-05 | 0.005687 |
| 0 | 0        | 0 | 0.000197 | 0 | 0        | 0        | 0        | 9.86E-05 |

| k_Bacteri |
|-----------|-----------|-----------|-----------|-----------|-----------|-----------|-----------|-----------|
| 0         | 0         | 0         | 0         | 0         | 0         | 0         | 0         | 0         |
| 0         | 0         | 0         | 0         | 0         | 0         | 0         | 0         | 0         |
| 0         | 0         | 0         | 0         | 0         | 0         | 0         | 0         | 0         |
| 0         | 0         | 0         | 0         | 0         | 0         | 0         | 0         | 0         |
| 0         | 0         | 0         | 3.29E-05  | 0         | 0         | 0         | 0         | 0         |
| 0         | 0         | 0         | 0         | 0         | 0         | 0         | 0         | 0         |
| 0         | 0         | 0         | 0         | 0         | 0         | 0         | 0         | 0         |
| 0         | 0         | 0         | 0         | 0         | 0         | 0         | 0         | 0         |
| 0         | 0         | 0         | 0         | 0         | 0         | 0         | 0         | 0         |
| 0         | 0         | 0         | 0.000131  | 0         | 0         | 0         | 0         | 0         |
| 0         | 0         | 0         | 0         | 0         | 0         | 0         | 0         | 0         |
| 0         | 0         | 0         | 0         | 0         | 0         | 0         | 0         | 0         |
| 0         | 0         | 0         | 3.29E-05  | 0         | 0         | 0         | 0         | 0         |
| 0         | 0         | 0.000131  | 0.009073  | 0         | 0         | 0         | 0         | 0         |
| 0         | 0         | 3.29E-05  | 0.002498  | 0         | 0         | 0         | 0         | 0         |
| 0         | 0         | 0         | 0         | 0         | 0         | 0         | 0         | 0         |
| 0         | 0         | 0         | 0         | 0         | 0         | 0         | 0         | 0         |
| 0         | 0         | 0         | 3.29E-05  | 0         | 0         | 0         | 0         | 0         |
| 0         | 0         | 0         | 0         | 0         | 0         | 0         | 0         | 0         |
| 0         | 0         | 0         | 0         | 0         | 0         | 0         | 0         | 0         |
| 0         | 0         | 0         | 6.57E-05  | 0         | 0         | 0         | 0         | 0         |
| 0         | 0         | 0         | 0.000164  | 0         | 0.000296  | 0         | 0         | 0         |
| 0         | 0         | 0         | 0         | 0         | 3.29E-05  | 0         | 0         | 0         |
| 0         | 0         | 0         | 0         | 0         | 0         | 0         | 0         | 0         |
| 0         | 0         | 0         | 3.29E-05  | 0         | 6.57E-05  | 0         | 0         | 0         |
| 0         | 0         | 0         | 3.29E-05  | 0         | 3.29E-05  | 0         | 0         | 0         |
| 0         | 0         | 0         | 0         | 0         | 0         | 0         | 0         | 0         |
| 0         | 0         | 0         | 3.29E-05  | 0         | 3.29E-05  | 0         | 0         | 0         |
| 0         | 0         | 0         | 0         | 0         | 0.000131  | 0         | 0         | 0         |
| 0         | 0         | 0         | 0.000164  | 0         | 0         | 0         | 0         | 0         |
| 0         | 0         | 0         | 3.29E-05  | 0         | 3.29E-05  | 0         | 0         | 0         |
| 0         | 0         | 0         | 0         | 0         | 3.29E-05  | 0         | 0         | 0         |
| 0         | 0         | 0         | 6.57E-05  | 0         | 0         | 0         | 0         | 0         |
| 0         | 0         | 0         | 0.024031  | 0         | 3.29E-05  | 0         | 0         | 0.000131  |
| 0         | 0         | 0         | 0.000986  | 0         | 0         | 0         | 0         | 0         |
| 0         | 0         | 0         | 0.01453   | 0         | 0.000559  | 0         | 0         | 0         |
| 0         | 0         | 0         | 0.004504  | 0         | 0         | 0         | 0         | 0         |
| 0         | 0         | 0         | 0.013215  | 0         | 0         | 0         | 0         | 0         |
| 0         | 0         | 0         | 0.056971  | 0         | 3.29E-05  | 0         | 0         | 0         |
| 0         | 0         | 0         | 0.008547  | 0         | 3.29E-05  | 0         | 0         | 0         |
| 0         | 0         | 0         | 0.007791  | 0         | 6.57E-05  | 0         | 6.57E-05  | 0         |
| 0         | 0         | 0         | 0.003616  | 0         | 0         | 0         | 0         | 0         |
| 3.29E-05  | 0         | 0         | 0.001907  | 0         | 0         | 0         | 0         | 0         |
| 0         | 0         | 0         | 3.29E-05  | 0         | 0         | 0         | 0         | 0         |

|   |   |          |          |          |          |          |          |   |
|---|---|----------|----------|----------|----------|----------|----------|---|
| 0 | 0 | 0        | 0        | 0        | 0        | 0        | 0        | 0 |
| 0 | 0 | 0        | 0        | 0        | 0        | 0.000131 | 0        | 0 |
| 0 | 0 | 0        | 0        | 0        | 0        | 0        | 0        | 0 |
| 0 | 0 | 0        | 0        | 0        | 6.57E-05 | 0        | 6.57E-05 | 0 |
| 0 | 0 | 0        | 0        | 0        | 0        | 0        | 0        | 0 |
| 0 | 0 | 0        | 0.000131 | 0        | 0        | 0        | 0        | 0 |
| 0 | 0 | 0        | 0        | 0        | 0        | 0        | 0        | 0 |
| 0 | 0 | 0        | 0        | 0        | 0.000197 | 0        | 3.29E-05 | 0 |
| 0 | 0 | 0        | 3.29E-05 | 0        | 0.000427 | 0        | 6.57E-05 | 0 |
| 0 | 0 | 0        | 0        | 0        | 0        | 0        | 0        | 0 |
| 0 | 0 | 0        | 0.000822 | 0        | 0        | 0        | 0        | 0 |
| 0 | 0 | 0        | 0        | 0        | 0        | 0        | 0        | 0 |
| 0 | 0 | 0        | 0        | 0        | 0        | 0        | 0        | 0 |
| 0 | 0 | 0        | 0        | 0        | 0        | 0        | 0        | 0 |
| 0 | 0 | 6.57E-05 | 0.006542 | 0        | 0        | 0        | 0        | 0 |
| 0 | 0 | 0        | 0.004471 | 0        | 0        | 0        | 0        | 0 |
| 0 | 0 | 0        | 0.000559 | 0        | 6.57E-05 | 0        | 0        | 0 |
| 0 | 0 | 0        | 0        | 6.57E-05 | 0        | 0        | 0        | 0 |
| 0 | 0 | 0        | 3.29E-05 | 0        | 0        | 0        | 0        | 0 |
| 0 | 0 | 0        | 0.000394 | 0        | 0        | 0        | 0        | 0 |
| 0 | 0 | 0        | 3.29E-05 | 0        | 0        | 0        | 0        | 0 |
| 0 | 0 | 0        | 0        | 0        | 0        | 0        | 0        | 0 |
| 0 | 0 | 0        | 3.29E-05 | 0        | 0        | 0        | 0        | 0 |
| 0 | 0 | 0        | 0        | 0        | 6.57E-05 | 0        | 0        | 0 |
| 0 | 0 | 0        | 6.57E-05 | 0        | 0        | 0        | 0        | 0 |
| 0 | 0 | 0        | 0        | 0        | 0        | 0        | 0        | 0 |
| 0 | 0 | 0        | 0        | 0        | 0        | 0        | 0        | 0 |
| 0 | 0 | 0        | 3.29E-05 | 0        | 0        | 0        | 0        | 0 |
| 0 | 0 | 0        | 0.000592 | 0        | 0        | 0        | 0        | 0 |
| 0 | 0 | 0        | 0        | 0        | 0        | 0        | 0        | 0 |
| 0 | 0 | 0        | 3.29E-05 | 0        | 0        | 0        | 0        | 0 |
| 0 | 0 | 0        | 6.57E-05 | 0        | 0        | 0        | 0        | 0 |
| 0 | 0 | 0        | 0        | 0        | 0        | 0        | 0        | 0 |
| 0 | 0 | 0        | 3.29E-05 | 0        | 0        | 0        | 0        | 0 |
| 0 | 0 | 0        | 0.000131 | 0        | 0        | 0        | 0        | 0 |
| 0 | 0 | 0        | 9.86E-05 | 0        | 0        | 0        | 0        | 0 |
| 0 | 0 | 0        | 0.001841 | 0        | 0        | 0        | 0        | 0 |
| 0 | 0 | 0        | 0        | 0        | 0        | 0        | 0        | 0 |
| 0 | 0 | 0        | 0.003024 | 0        | 0        | 0        | 0        | 0 |
| 0 | 0 | 0        | 0.003452 | 0        | 0        | 0        | 0        | 0 |
| 0 | 0 | 0        | 0        | 0        | 9.86E-05 | 9.86E-05 | 0        | 0 |
| 0 | 0 | 0        | 0        | 0        | 0        | 6.57E-05 | 0        | 0 |
| 0 | 0 | 0        | 0        | 0        | 0        | 0        | 0        | 0 |
| 0 | 0 | 0        | 3.29E-05 | 0        | 0        | 0        | 0        | 0 |
| 0 | 0 | 0        | 0        | 0        | 0        | 0        | 0        | 0 |
| 0 | 0 | 0        | 0.0048   | 0        | 0.000131 | 0        | 0        | 0 |
| 0 | 0 | 0        | 0        | 0        | 9.86E-05 | 0        | 0        | 0 |

|   |          |          |          |   |          |          |          |          |
|---|----------|----------|----------|---|----------|----------|----------|----------|
| 0 | 0        | 0        | 0        | 0 | 0        | 0        | 0        | 0        |
| 0 | 0        | 0        | 0        | 0 | 0.00023  | 0        | 0        | 0        |
| 0 | 0        | 0        | 0        | 0 | 0.000888 | 0        | 0        | 0        |
| 0 | 0        | 0        | 0.003485 | 0 | 0        | 0        | 0        | 0        |
| 0 | 0        | 0        | 0        | 0 | 0.000427 | 0        | 0        | 0        |
| 0 | 0        | 0        | 0        | 0 | 0        | 0        | 0        | 0        |
| 0 | 0        | 0        | 0        | 0 | 0        | 0        | 0        | 0        |
| 0 | 0        | 0        | 0        | 0 | 0        | 0        | 0        | 0        |
| 0 | 0        | 0        | 0        | 0 | 0        | 0        | 0        | 0        |
| 0 | 0        | 0        | 0        | 0 | 0.000131 | 0        | 3.29E-05 | 0        |
| 0 | 0        | 0        | 0        | 0 | 9.86E-05 | 0        | 0        | 0        |
| 0 | 0        | 0        | 3.29E-05 | 0 | 0        | 0        | 3.29E-05 | 0        |
| 0 | 0        | 0        | 0        | 0 | 0        | 0        | 0        | 0        |
| 0 | 0        | 0        | 0.001019 | 0 | 0        | 0        | 0        | 0        |
| 0 | 0        | 0        | 0        | 0 | 0        | 0        | 0        | 0        |
| 0 | 0        | 0        | 3.29E-05 | 0 | 0        | 0        | 0        | 0        |
| 0 | 0        | 0        | 0        | 0 | 0        | 0        | 0        | 0        |
| 0 | 0        | 0        | 0        | 0 | 0        | 0        | 0        | 0        |
| 0 | 0        | 0        | 0        | 0 | 0        | 0        | 0        | 0        |
| 0 | 0        | 0        | 0        | 0 | 0        | 0        | 0        | 0        |
| 0 | 0        | 0        | 0        | 0 | 0        | 0        | 0        | 0        |
| 0 | 0        | 0        | 0        | 0 | 0        | 0        | 0        | 0        |
| 0 | 0        | 0        | 0.00286  | 0 | 3.29E-05 | 0        | 0        | 0        |
| 0 | 0        | 0        | 0.001611 | 0 | 6.57E-05 | 0        | 0        | 0        |
| 0 | 0        | 0        | 0.003024 | 0 | 6.57E-05 | 6.57E-05 | 0        | 0        |
| 0 | 0        | 0        | 0.001414 | 0 | 0        | 0        | 0        | 0        |
| 0 | 0        | 0        | 0.001907 | 0 | 0.000493 | 3.29E-05 | 0.00023  | 0        |
| 0 | 0        | 0        | 0.000888 | 0 | 6.57E-05 | 0        | 0        | 0        |
| 0 | 0        | 0        | 0.000756 | 0 | 0.000263 | 6.57E-05 | 0        | 0        |
| 0 | 0        | 0        | 3.29E-05 | 0 | 0        | 0        | 0        | 0        |
| 0 | 0        | 0        | 0.000526 | 0 | 6.57E-05 | 6.57E-05 | 0        | 0        |
| 0 | 0        | 0        | 6.57E-05 | 0 | 0.00023  | 0        | 0        | 0        |
| 0 | 0        | 0        | 0.001742 | 0 | 0.000131 | 0        | 0        | 0        |
| 0 | 0        | 0        | 0.000427 | 0 | 0        | 0        | 0        | 0        |
| 0 | 0        | 0        | 0        | 0 | 0.000164 | 0        | 0        | 0        |
| 0 | 0        | 0        | 0.000526 | 0 | 9.86E-05 | 0        | 0        | 0        |
| 0 | 0        | 0        | 0        | 0 | 0.000526 | 0        | 0        | 0        |
| 0 | 0        | 0        | 0.000131 | 0 | 0.00046  | 0        | 0        | 0        |
| 0 | 0        | 0        | 0.000427 | 0 | 3.29E-05 | 0        | 0        | 0        |
| 0 | 0.000131 | 0        | 0.004537 | 0 | 0        | 0        | 0        | 0        |
| 0 | 3.29E-05 | 3.29E-05 | 0.009271 | 0 | 0.000164 | 0        | 0        | 0        |
| 0 | 0        | 0        | 0.090536 | 0 | 0        | 0        | 0        | 0        |
| 0 | 0        | 0        | 0.032184 | 0 | 0.000263 | 0.000427 | 0        | 3.29E-05 |
| 0 | 0        | 0        | 0.009501 | 0 | 0        | 6.57E-05 | 0        | 0        |
| 0 | 0        | 0        | 3.29E-05 | 0 | 3.29E-05 | 0        | 0        | 0        |
| 0 | 0        | 0        | 0        | 0 | 0.000329 | 0        | 0        | 0        |
| 0 | 0        | 0        | 0        | 0 | 6.57E-05 | 0        | 0        | 0        |
| 0 | 0        | 0        | 0        | 0 | 6.57E-05 | 0        | 0        | 0        |



|   |   |   |          |   |          |          |          |          |
|---|---|---|----------|---|----------|----------|----------|----------|
| 0 | 0 | 0 | 0        | 0 | 0        | 0        | 0        | 0        |
| 0 | 0 | 0 | 6.57E-05 | 0 | 0        | 0        | 0        | 0        |
| 0 | 0 | 0 | 0        | 0 | 0        | 0        | 0        | 0        |
| 0 | 0 | 0 | 0        | 0 | 0        | 0        | 0        | 0        |
| 0 | 0 | 0 | 0        | 0 | 0        | 0        | 0        | 0        |
| 0 | 0 | 0 | 0        | 0 | 3.29E-05 | 0        | 0        | 0        |
| 0 | 0 | 0 | 0        | 0 | 0        | 0        | 0        | 0        |
| 0 | 0 | 0 | 0        | 0 | 0        | 0        | 0        | 0        |
| 0 | 0 | 0 | 3.29E-05 | 0 | 0        | 0        | 0        | 0        |
| 0 | 0 | 0 | 0        | 0 | 0        | 0        | 0        | 0        |
| 0 | 0 | 0 | 0        | 0 | 0        | 0        | 0        | 0        |
| 0 | 0 | 0 | 0.000625 | 0 | 6.57E-05 | 0.000263 | 3.29E-05 | 0        |
| 0 | 0 | 0 | 0.000362 | 0 | 3.29E-05 | 0        | 0        | 0        |
| 0 | 0 | 0 | 0.029159 | 0 | 0        | 0        | 0        | 0        |
| 0 | 0 | 0 | 0.028732 | 0 | 0.000131 | 0        | 0        | 0        |
| 0 | 0 | 0 | 3.29E-05 | 0 | 0        | 0        | 0        | 0        |
| 0 | 0 | 0 | 0        | 0 | 0        | 0        | 0        | 0        |
| 0 | 0 | 0 | 0        | 0 | 0        | 0        | 0        | 0        |
| 0 | 0 | 0 | 0        | 0 | 0        | 0        | 0        | 0        |
| 0 | 0 | 0 | 0        | 0 | 0        | 0        | 0        | 0        |
| 0 | 0 | 0 | 0        | 0 | 0        | 0        | 0        | 0        |
| 0 | 0 | 0 | 0        | 0 | 0        | 0        | 0        | 0        |
| 0 | 0 | 0 | 0        | 0 | 0        | 0        | 0        | 0        |
| 0 | 0 | 0 | 0        | 0 | 0        | 0        | 0        | 0        |
| 0 | 0 | 0 | 3.29E-05 | 0 | 0        | 9.86E-05 | 0        | 0        |
| 0 | 0 | 0 | 0        | 0 | 0        | 0        | 0        | 0        |
| 0 | 0 | 0 | 3.29E-05 | 0 | 0        | 0        | 0        | 0        |
| 0 | 0 | 0 | 0.000526 | 0 | 0        | 0        | 0        | 0        |
| 0 | 0 | 0 | 0.008777 | 0 | 0        | 0        | 0        | 0        |
| 0 | 0 | 0 | 0.0024   | 0 | 0        | 0        | 0        | 0        |
| 0 | 0 | 0 | 0.00046  | 0 | 0.000263 | 0        | 0        | 0        |
| 0 | 0 | 0 | 0        | 0 | 3.29E-05 | 3.29E-05 | 0        | 0        |
| 0 | 0 | 0 | 0.000427 | 0 | 0        | 0        | 0        | 0        |
| 0 | 0 | 0 | 0        | 0 | 0        | 0        | 0        | 0        |
| 0 | 0 | 0 | 0        | 0 | 0        | 0        | 0        | 0        |
| 0 | 0 | 0 | 0        | 0 | 0        | 0        | 0        | 0        |
| 0 | 0 | 0 | 0        | 0 | 0        | 0        | 0        | 0        |
| 0 | 0 | 0 | 3.29E-05 | 0 | 0.001249 | 0        | 0        | 0        |
| 0 | 0 | 0 | 3.29E-05 | 0 | 0.000131 | 0        | 0        | 0        |
| 0 | 0 | 0 | 0        | 0 | 0        | 0        | 0        | 0        |
| 0 | 0 | 0 | 0        | 0 | 3.29E-05 | 0        | 0        | 0        |
| 0 | 0 | 0 | 0.002466 | 0 | 0.000131 | 0        | 0        | 0        |
| 0 | 0 | 0 | 0.003748 | 0 | 0        | 0        | 0        | 0        |
| 0 | 0 | 0 | 0.00092  | 0 | 0.000296 | 9.86E-05 | 0        | 0        |
| 0 | 0 | 0 | 0.063349 | 0 | 0        | 0        | 0        | 0        |
| 0 | 0 | 0 | 0.019199 | 0 | 0        | 0        | 0        | 0        |
| 0 | 0 | 0 | 0.014662 | 0 | 9.86E-05 | 0.000131 | 0        | 3.29E-05 |
| 0 | 0 | 0 | 0.013873 | 0 | 0.000164 | 3.29E-05 | 0        | 3.29E-05 |
| 0 | 0 | 0 | 0.01315  | 0 | 0        | 0        | 0        | 0        |
| 0 | 0 | 0 | 0.034255 | 0 | 3.29E-05 | 0        | 0        | 0        |

|   |          |   |          |   |          |          |   |          |
|---|----------|---|----------|---|----------|----------|---|----------|
| 0 | 0        | 0 | 0.003616 | 0 | 0.000131 | 0.000131 | 0 | 0        |
| 0 | 0        | 0 | 0.001874 | 0 | 0.000592 | 0        | 0 | 0        |
| 0 | 0        | 0 | 0.003682 | 0 | 6.57E-05 | 0        | 0 | 0        |
| 0 | 0        | 0 | 3.29E-05 | 0 | 0        | 0        | 0 | 0        |
| 0 | 0        | 0 | 0        | 0 | 0        | 0        | 0 | 0        |
| 0 | 0        | 0 | 3.29E-05 | 0 | 0        | 0        | 0 | 0        |
| 0 | 3.29E-05 | 0 | 0.001907 | 0 | 0        | 0        | 0 | 0        |
| 0 | 0        | 0 | 3.29E-05 | 0 | 0        | 0        | 0 | 0        |
| 0 | 0        | 0 | 6.57E-05 | 0 | 0        | 0        | 0 | 0        |
| 0 | 0        | 0 | 0.003156 | 0 | 0        | 0        | 0 | 0        |
| 0 | 0        | 0 | 0        | 0 | 0        | 0        | 0 | 0        |
| 0 | 0        | 0 | 0        | 0 | 0        | 0        | 0 | 0        |
| 0 | 0        | 0 | 3.29E-05 | 0 | 0        | 0        | 0 | 0        |
| 0 | 0        | 0 | 0.000657 | 0 | 0        | 0        | 0 | 0        |
| 0 | 0        | 0 | 0.00194  | 0 | 0        | 0        | 0 | 0        |
| 0 | 0        | 0 | 0.000789 | 0 | 0        | 0        | 0 | 3.29E-05 |
| 0 | 0        | 0 | 0.000526 | 0 | 0        | 0        | 0 | 0        |
| 0 | 0        | 0 | 0.001381 | 0 | 0        | 0        | 0 | 0        |
| 0 | 0        | 0 | 0.001381 | 0 | 3.29E-05 | 0        | 0 | 0        |
| 0 | 0        | 0 | 0.001709 | 0 | 0.000131 | 0        | 0 | 0        |
| 0 | 0        | 0 | 0.005194 | 0 | 0        | 0.000296 | 0 | 0        |
| 0 | 0        | 0 | 0.001611 | 0 | 0.000197 | 0.000197 | 0 | 3.29E-05 |
| 0 | 0        | 0 | 0.000197 | 0 | 0        | 0        | 0 | 0        |
| 0 | 0        | 0 | 0.000362 | 0 | 0        | 0        | 0 | 0        |
| 0 | 0        | 0 | 0        | 0 | 0        | 0        | 0 | 0        |
| 0 | 0        | 0 | 0        | 0 | 6.57E-05 | 0        | 0 | 0        |
| 0 | 0        | 0 | 0        | 0 | 0        | 0        | 0 | 0        |
| 0 | 0        | 0 | 0        | 0 | 0        | 0        | 0 | 0        |
| 0 | 0        | 0 | 9.86E-05 | 0 | 0        | 0        | 0 | 0        |
| 0 | 0        | 0 | 0        | 0 | 3.29E-05 | 0        | 0 | 0        |
| 0 | 0        | 0 | 0        | 0 | 0        | 0        | 0 | 0        |
| 0 | 0        | 0 | 0        | 0 | 0        | 0        | 0 | 0        |
| 0 | 0        | 0 | 3.29E-05 | 0 | 0        | 0        | 0 | 0        |
| 0 | 0        | 0 | 0        | 0 | 0        | 0        | 0 | 0        |
| 0 | 0        | 0 | 3.29E-05 | 0 | 0        | 0        | 0 | 0        |
| 0 | 0        | 0 | 9.86E-05 | 0 | 0.000986 | 0.000164 | 0 | 0        |
| 0 | 0        | 0 | 0        | 0 | 3.29E-05 | 0        | 0 | 0        |
| 0 | 0        | 0 | 0.000164 | 0 | 0        | 0        | 0 | 0        |
| 0 | 0        | 0 | 0.002367 | 0 | 0        | 0        | 0 | 0        |
| 0 | 0        | 0 | 0        | 0 | 0.000625 | 0        | 0 | 0        |
| 0 | 0        | 0 | 0        | 0 | 0        | 0        | 0 | 0        |
| 0 | 0        | 0 | 0        | 0 | 0        | 0        | 0 | 0        |
| 0 | 0        | 0 | 0.00069  | 0 | 0        | 0        | 0 | 0        |
| 0 | 0        | 0 | 0.002761 | 0 | 0        | 0        | 0 | 0        |
| 0 | 0        | 0 | 0.006805 | 0 | 0.000164 | 0        | 0 | 0        |
| 0 | 0        | 0 | 0.003846 | 0 | 0        | 0        | 0 | 0        |
| 0 | 3.29E-05 | 0 | 0.003518 | 0 | 0        | 0        | 0 | 0        |

|   |          |          |          |   |          |          |          |          |
|---|----------|----------|----------|---|----------|----------|----------|----------|
| 0 | 0        | 0        | 0.005161 | 0 | 0        | 0        | 0        | 0        |
| 0 | 0        | 0        | 0.007265 | 0 | 0        | 0        | 3.29E-05 | 0        |
| 0 | 0        | 0        | 0.007101 | 0 | 0        | 0.000164 | 0        | 0        |
| 0 | 0        | 0        | 0.000953 | 0 | 0        | 0        | 0        | 0        |
| 0 | 0        | 0        | 3.29E-05 | 0 | 9.86E-05 | 0        | 0        | 0        |
| 0 | 0        | 0        | 0.000263 | 0 | 0.000131 | 0.00023  | 0        | 0        |
| 0 | 6.57E-05 | 0.001972 | 0.008909 | 0 | 0        | 0        | 0        | 0        |
| 0 | 0        | 0.000855 | 0.00503  | 0 | 0.000296 | 0        | 0        | 9.86E-05 |
| 0 | 0        | 0.002761 | 0.00503  | 0 | 0        | 0        | 0        | 0        |
| 0 | 0        | 0.000296 | 0.00217  | 0 | 6.57E-05 | 0        | 0        | 0        |
| 0 | 0        | 0.000427 | 0.00092  | 0 | 0.000131 | 0        | 0        | 6.57E-05 |
| 0 | 3.29E-05 | 0.003616 | 0.013774 | 0 | 0        | 0        | 0        | 0.000131 |
| 0 | 0        | 0.000394 | 0.020218 | 0 | 0.00023  | 0        | 0        | 0        |
| 0 | 0        | 0.00046  | 0.01739  | 0 | 0.00023  | 0        | 0        | 0.000131 |
| 0 | 0        | 0        | 0        | 0 | 0        | 0        | 0        | 0        |
| 0 | 0        | 0        | 9.86E-05 | 0 | 0.000625 | 0        | 6.57E-05 | 0        |
| 0 | 0        | 0        | 0        | 0 | 0        | 0        | 0        | 0        |
| 0 | 0        | 0        | 0.000131 | 0 | 3.29E-05 | 0        | 0        | 0        |
| 0 | 0        | 0        | 3.29E-05 | 0 | 0        | 0        | 0        | 0        |
| 0 | 0        | 0        | 0        | 0 | 3.29E-05 | 0        | 0        | 0        |
| 0 | 0        | 0        | 0        | 0 | 0        | 0        | 0        | 0        |
| 0 | 0        | 0        | 0        | 0 | 6.57E-05 | 0        | 0        | 0        |
| 0 | 0        | 0        | 0        | 0 | 0.000394 | 0        | 0        | 0        |
| 0 | 0        | 0        | 0        | 0 | 0        | 0        | 0        | 0        |
| 0 | 0        | 0        | 0.00092  | 0 | 0        | 0        | 0        | 0        |
| 0 | 0        | 0        | 0        | 0 | 0        | 0        | 0        | 0        |
| 0 | 0        | 0        | 3.29E-05 | 0 | 0        | 0        | 0        | 0        |
| 0 | 0        | 0        | 0        | 0 | 0        | 0        | 0        | 0        |
| 0 | 0        | 0        | 0        | 0 | 6.57E-05 | 0        | 0        | 0        |
| 0 | 0        | 0        | 0        | 0 | 0.000131 | 0        | 0        | 0        |
| 0 | 0        | 0        | 0        | 0 | 0        | 0        | 0        | 0        |
| 0 | 0        | 0        | 3.29E-05 | 0 | 0.000263 | 9.86E-05 | 0        | 0        |
| 0 | 0        | 0        | 0        | 0 | 3.29E-05 | 0.000131 | 0        | 0        |
| 0 | 0        | 0        | 0        | 0 | 0        | 0        | 0        | 0        |
| 0 | 0        | 0        | 0        | 0 | 0        | 0        | 0        | 0        |
| 0 | 0        | 0        | 0        | 0 | 0        | 0        | 0        | 0        |
| 0 | 0        | 0        | 0        | 0 | 3.29E-05 | 0        | 0        | 0        |
| 0 | 0        | 0        | 6.57E-05 | 0 | 0        | 0        | 0        | 0        |
| 0 | 0        | 0        | 3.29E-05 | 0 | 0        | 0        | 0        | 0        |
| 0 | 0        | 0        | 0        | 0 | 0        | 0        | 0        | 0        |
| 0 | 0        | 0        | 0        | 0 | 0        | 0        | 0        | 0        |
| 0 | 0        | 0        | 0        | 0 | 0        | 0        | 0        | 0        |
| 0 | 0        | 0        | 0        | 0 | 0        | 0        | 0        | 0        |
| 0 | 0        | 0        | 0        | 0 | 0        | 0        | 0        | 0        |
| 0 | 0        | 0        | 0        | 0 | 0        | 0        | 0        | 0        |
| 0 | 0        | 0        | 0.000559 | 0 | 0        | 0        | 0        | 0        |
| 0 | 0        | 0        | 0.004372 | 0 | 0        | 0        | 0        | 0        |
| 0 | 0        | 0        | 0.000197 | 0 | 0        | 0        | 0        | 0        |
| 0 | 0        | 0        | 0.000953 | 0 | 0.000197 | 0        | 0        | 0        |





|   |   |          |          |   |          |   |          |          |
|---|---|----------|----------|---|----------|---|----------|----------|
| 0 | 0 | 0        | 0        | 0 | 0        | 0 | 0        | 0        |
| 0 | 0 | 0        | 0.002367 | 0 | 0        | 0 | 0        | 0        |
| 0 | 0 | 0        | 3.29E-05 | 0 | 0        | 0 | 0        | 0        |
| 0 | 0 | 0        | 3.29E-05 | 0 | 0        | 0 | 0        | 0        |
| 0 | 0 | 0        | 0        | 0 | 0        | 0 | 0        | 0        |
| 0 | 0 | 0        | 0        | 0 | 0        | 0 | 0        | 0        |
| 0 | 0 | 0        | 0        | 0 | 0        | 0 | 0        | 0        |
| 0 | 0 | 0        | 0        | 0 | 0        | 0 | 0        | 0        |
| 0 | 0 | 0        | 0        | 0 | 0        | 0 | 0        | 0        |
| 0 | 0 | 0        | 3.29E-05 | 0 | 0        | 0 | 0        | 0        |
| 0 | 0 | 0        | 0        | 0 | 0        | 0 | 0        | 0        |
| 0 | 0 | 0        | 0        | 0 | 0        | 0 | 0        | 0        |
| 0 | 0 | 0        | 0        | 0 | 0        | 0 | 0        | 0        |
| 0 | 0 | 0        | 0        | 0 | 0        | 0 | 0        | 0        |
| 0 | 0 | 0        | 0        | 0 | 0        | 0 | 0        | 0        |
| 0 | 0 | 0        | 0        | 0 | 0        | 0 | 0        | 0        |
| 0 | 0 | 0        | 0        | 0 | 0        | 0 | 0        | 0        |
| 0 | 0 | 0        | 0        | 0 | 0        | 0 | 0        | 0        |
| 0 | 0 | 0        | 0        | 0 | 0        | 0 | 0        | 0        |
| 0 | 0 | 0        | 0        | 0 | 0.000263 | 0 | 0        | 0        |
| 0 | 0 | 0        | 0        | 0 | 0        | 0 | 0        | 0        |
| 0 | 0 | 0        | 0        | 0 | 0.000164 | 0 | 0        | 0        |
| 0 | 0 | 0        | 0.000427 | 0 | 0        | 0 | 0        | 0        |
| 0 | 0 | 0        | 0        | 0 | 0        | 0 | 3.29E-05 | 0        |
| 0 | 0 | 0        | 0        | 0 | 3.29E-05 | 0 | 0        | 0        |
| 0 | 0 | 0        | 0        | 0 | 0        | 0 | 0        | 0        |
| 0 | 0 | 0        | 0        | 0 | 6.57E-05 | 0 | 0        | 0        |
| 0 | 0 | 0        | 0.00263  | 0 | 0        | 0 | 0        | 0        |
| 0 | 0 | 0        | 0.00217  | 0 | 0        | 0 | 0        | 0        |
| 0 | 0 | 0        | 0.003781 | 0 | 0.00069  | 0 | 0.000131 | 0        |
| 0 | 0 | 0        | 0.002334 | 0 | 9.86E-05 | 0 | 0        | 0        |
| 0 | 0 | 0        | 9.86E-05 | 0 | 0.00046  | 0 | 0        | 0        |
| 0 | 0 | 0        | 0.0024   | 0 | 0        | 0 | 0        | 0        |
| 0 | 0 | 0        | 0.000592 | 0 | 0.000362 | 0 | 6.57E-05 | 0        |
| 0 | 0 | 0        | 0.008449 | 0 | 9.86E-05 | 0 | 0        | 0        |
| 0 | 0 | 0        | 0.001479 | 0 | 0        | 0 | 0        | 0        |
| 0 | 0 | 0        | 0.002794 | 0 | 3.29E-05 | 0 | 0        | 0        |
| 0 | 0 | 0        | 6.57E-05 | 0 | 3.29E-05 | 0 | 0        | 0        |
| 0 | 0 | 0        | 0.003386 | 0 | 3.29E-05 | 0 | 0        | 0        |
| 0 | 0 | 0.000131 | 0.015944 | 0 | 0        | 0 | 0        | 0        |
| 0 | 0 | 0.000427 | 0.00309  | 0 | 0        | 0 | 0        | 0        |
| 0 | 0 | 9.86E-05 | 0.077156 | 0 | 0.000131 | 0 | 0        | 0        |
| 0 | 0 | 0.000131 | 0.010125 | 0 | 0        | 0 | 0        | 0        |
| 0 | 0 | 3.29E-05 | 0.01384  | 0 | 3.29E-05 | 0 | 0        | 3.29E-05 |
| 0 | 0 | 0.000197 | 0.017949 | 0 | 0        | 0 | 0        | 0        |
| 0 | 0 | 0        | 0.002696 | 0 | 0        | 0 | 0        | 0        |
| 0 | 0 | 0        | 0.002268 | 0 | 0        | 0 | 0        | 0        |
| 0 | 0 | 0        | 0.003024 | 0 | 3.29E-05 | 0 | 0        | 0        |
| 0 | 0 | 0        | 0.000394 | 0 | 0        | 0 | 0        | 0        |

|   |   |   |          |   |          |          |          |          |
|---|---|---|----------|---|----------|----------|----------|----------|
| 0 | 0 | 0 | 0.001512 | 0 | 0        | 0        | 0        | 0        |
| 0 | 0 | 0 | 0.00046  | 0 | 0        | 0        | 0        | 0        |
| 0 | 0 | 0 | 0        | 0 | 0        | 0        | 0        | 0        |
| 0 | 0 | 0 | 0.000131 | 0 | 0        | 0        | 0        | 0        |
| 0 | 0 | 0 | 0.000592 | 0 | 0        | 0        | 0        | 0        |
| 0 | 0 | 0 | 0.002137 | 0 | 0.000296 | 0        | 0        | 0        |
| 0 | 0 | 0 | 0.019692 | 0 | 9.86E-05 | 0        | 0        | 9.86E-05 |
| 0 | 0 | 0 | 0.002203 | 0 | 3.29E-05 | 0        | 0        | 0        |
| 0 | 0 | 0 | 0.032907 | 0 | 0.000296 | 0        | 0        | 0        |
| 0 | 0 | 0 | 0.006575 | 0 | 9.86E-05 | 0        | 0        | 0        |
| 0 | 0 | 0 | 0.035997 | 0 | 6.57E-05 | 0        | 0        | 0        |
| 0 | 0 | 0 | 0.007397 | 0 | 0.000592 | 0        | 0        | 0        |
| 0 | 0 | 0 | 0.036227 | 0 | 0        | 0        | 0        | 0        |
| 0 | 0 | 0 | 0.012952 | 0 | 0.000329 | 0        | 0        | 3.29E-05 |
| 0 | 0 | 0 | 0.004767 | 0 | 0.001282 | 0.000131 | 3.29E-05 | 0        |
| 0 | 0 | 0 | 0.010848 | 0 | 0.000493 | 0.00046  | 0        | 0        |
| 0 | 0 | 0 | 0.004011 | 0 | 9.86E-05 | 0        | 0        | 0        |
| 0 | 0 | 0 | 0.001479 | 0 | 0.000131 | 3.29E-05 | 0        | 0        |
| 0 | 0 | 0 | 0.000592 | 0 | 0.000263 | 0        | 0        | 0        |
| 0 | 0 | 0 | 0.025017 | 0 | 0        | 0        | 0        | 0        |
| 0 | 0 | 0 | 0.00217  | 0 | 0        | 0        | 3.29E-05 | 0        |
| 0 | 0 | 0 | 0        | 0 | 0        | 0        | 0        | 0        |
| 0 | 0 | 0 | 0        | 0 | 0        | 0        | 0        | 0        |
| 0 | 0 | 0 | 0        | 0 | 0        | 0        | 6.57E-05 | 0        |
| 0 | 0 | 0 | 0.006706 | 0 | 0.00069  | 3.29E-05 | 6.57E-05 | 0.000164 |
| 0 | 0 | 0 | 0.006115 | 0 | 0        | 0        | 0        | 0        |
| 0 | 0 | 0 | 0.005556 | 0 | 0        | 0        | 0        | 0        |
| 0 | 0 | 0 | 0.000164 | 0 | 0        | 0        | 0        | 0        |
| 0 | 0 | 0 | 0.001512 | 0 | 9.86E-05 | 0        | 0        | 0        |
| 0 | 0 | 0 | 0.02002  | 0 | 0.000263 | 0        | 0        | 0        |
| 0 | 0 | 0 | 0.075709 | 0 | 0        | 0        | 0        | 0        |
| 0 | 0 | 0 | 0.027417 | 0 | 0.000329 | 0        | 0        | 0        |
| 0 | 0 | 0 | 0.004767 | 0 | 0        | 0        | 0        | 0        |
| 0 | 0 | 0 | 0.004537 | 0 | 0.000164 | 0        | 0        | 0        |
| 0 | 0 | 0 | 3.29E-05 | 0 | 0        | 0        | 0        | 0        |
| 0 | 0 | 0 | 0        | 0 | 0        | 0        | 0        | 0        |
| 0 | 0 | 0 | 0.000362 | 0 | 0        | 0        | 0        | 0        |
| 0 | 0 | 0 | 0        | 0 | 0        | 0        | 0        | 0        |
| 0 | 0 | 0 | 6.57E-05 | 0 | 0        | 0        | 0        | 0        |
| 0 | 0 | 0 | 9.86E-05 | 0 | 0        | 0        | 0        | 0        |
| 0 | 0 | 0 | 0.004635 | 0 | 0        | 0        | 0        | 0        |
| 0 | 0 | 0 | 0        | 0 | 0        | 0        | 0        | 0        |
| 0 | 0 | 0 | 0        | 0 | 0        | 0        | 0        | 0        |
| 0 | 0 | 0 | 0        | 0 | 0        | 0        | 0        | 0        |
| 0 | 0 | 0 | 0        | 0 | 0        | 0        | 0        | 0        |
| 0 | 0 | 0 | 0.036655 | 0 | 0        | 0.000131 | 3.29E-05 | 0        |
| 0 | 0 | 0 | 0.323318 | 0 | 0        | 0        | 0        | 0        |

|   |   |          |          |   |          |          |          |          |
|---|---|----------|----------|---|----------|----------|----------|----------|
| 0 | 0 | 0        | 0.000723 | 0 | 0        | 0        | 0        | 0        |
| 0 | 0 | 0        | 3.29E-05 | 0 | 0        | 0        | 0        | 0        |
| 0 | 0 | 0        | 6.57E-05 | 0 | 3.29E-05 | 0        | 0        | 0        |
| 0 | 0 | 0        | 0.00092  | 0 | 0        | 0        | 0        | 0        |
| 0 | 0 | 0        | 0        | 0 | 0        | 0        | 0        | 0        |
| 0 | 0 | 0        | 0        | 0 | 0        | 0        | 0        | 0        |
| 0 | 0 | 0        | 3.29E-05 | 0 | 0        | 0        | 0        | 0        |
| 0 | 0 | 0        | 0        | 0 | 0        | 0        | 0        | 0        |
| 0 | 0 | 0        | 0        | 0 | 0        | 0        | 0        | 0        |
| 0 | 0 | 6.57E-05 | 0.006608 | 0 | 0        | 0        | 0        | 0        |
| 0 | 0 | 0        | 3.29E-05 | 0 | 0        | 0        | 0        | 0        |
| 0 | 0 | 0        | 0        | 0 | 0        | 0        | 0        | 0        |
| 0 | 0 | 0        | 0.00023  | 0 | 0        | 0        | 0        | 0        |
| 0 | 0 | 0        | 0.000362 | 0 | 0        | 0        | 0        | 0        |
| 0 | 0 | 0        | 0.000131 | 0 | 0        | 0        | 0        | 0        |
| 0 | 0 | 0        | 0        | 0 | 0        | 0        | 0        | 0        |
| 0 | 0 | 0        | 3.29E-05 | 0 | 0        | 0        | 0        | 0        |
| 0 | 0 | 0        | 0        | 0 | 0        | 0        | 0        | 0        |
| 0 | 0 | 0        | 0        | 0 | 0        | 0        | 0        | 0        |
| 0 | 0 | 0        | 0.000953 | 0 | 0        | 0        | 0        | 0        |
| 0 | 0 | 0        | 9.86E-05 | 0 | 0        | 0        | 0        | 0        |
| 0 | 0 | 0        | 0        | 0 | 0        | 0        | 3.29E-05 | 0        |
| 0 | 0 | 0        | 3.29E-05 | 0 | 0        | 0        | 0        | 0        |
| 0 | 0 | 0        | 0.002235 | 0 | 0.00069  | 0        | 3.29E-05 | 0        |
| 0 | 0 | 0        | 3.29E-05 | 0 | 0        | 0        | 0        | 0        |
| 0 | 0 | 0        | 0        | 0 | 0        | 0        | 0        | 0        |
| 0 | 0 | 0        | 0.007101 | 0 | 0.000986 | 0.000164 | 0        | 0        |
| 0 | 0 | 0        | 0.074887 | 0 | 0.000493 | 3.29E-05 | 6.57E-05 | 0        |
| 0 | 0 | 0        | 0.002926 | 0 | 9.86E-05 | 0.000131 | 0.000131 | 0        |
| 0 | 0 | 0        | 0.009566 | 0 | 0.000164 | 0.00023  | 0        | 0        |
| 0 | 0 | 0        | 0.013446 | 0 | 6.57E-05 | 0        | 0        | 0        |
| 0 | 0 | 0        | 0.001446 | 0 | 0.000296 | 6.57E-05 | 0        | 0        |
| 0 | 0 | 0        | 0.011013 | 0 | 0.001348 | 0.000427 | 3.29E-05 | 0        |
| 0 | 0 | 0.000164 | 0.0024   | 0 | 0.000986 | 0        | 0        | 3.29E-05 |
| 0 | 0 | 0        | 0        | 0 | 0        | 0        | 0        | 0        |
| 0 | 0 | 0        | 0.111049 | 0 | 0        | 0        | 0        | 0        |
| 0 | 0 | 0        | 0.00309  | 0 | 6.57E-05 | 0        | 0        | 0        |
| 0 | 0 | 0        | 0        | 0 | 0        | 0        | 0        | 0        |
| 0 | 0 | 0        | 0        | 0 | 0        | 0        | 0        | 0        |
| 0 | 0 | 0        | 0.000131 | 0 | 0        | 0        | 0        | 0        |
| 0 | 0 | 0.000362 | 0.020809 | 0 | 9.86E-05 | 0        | 0        | 3.29E-05 |
| 0 | 0 | 0.000131 | 0.005358 | 0 | 0        | 0        | 0        | 0        |
| 0 | 0 | 0.000526 | 0.03271  | 0 | 0        | 0        | 0        | 6.57E-05 |
| 0 | 0 | 0.00069  | 0.035636 | 0 | 0.000296 | 6.57E-05 | 0        | 0.000131 |
| 0 | 0 | 3.29E-05 | 0.006706 | 0 | 0        | 0        | 0        | 0        |
| 0 | 0 | 3.29E-05 | 0.002137 | 0 | 0        | 0        | 0        | 0        |

|   |          |          |          |   |          |          |          |          |
|---|----------|----------|----------|---|----------|----------|----------|----------|
| 0 | 0        | 0        | 0        | 0 | 0        | 0        | 0        | 0        |
| 0 | 0        | 0        | 0        | 0 | 0.00046  | 0        | 0        | 0        |
| 0 | 0        | 0        | 0        | 0 | 0        | 0        | 0        | 0        |
| 0 | 0        | 0        | 0.004471 | 0 | 0.002761 | 0.000427 | 0        | 0        |
| 0 | 0        | 0        | 9.86E-05 | 0 | 0        | 0        | 0        | 0        |
| 0 | 0        | 0        | 0        | 0 | 3.29E-05 | 0        | 0        | 0        |
| 0 | 0        | 0        | 0.005063 | 0 | 0        | 0        | 0        | 0        |
| 0 | 0        | 0        | 0.010816 | 0 | 0        | 0        | 0        | 0        |
| 0 | 0        | 0        | 0.001677 | 0 | 0.000263 | 0        | 0        | 0        |
| 0 | 0        | 0        | 0.018903 | 0 | 0        | 0        | 3.29E-05 | 0        |
| 0 | 3.29E-05 | 0        | 0.002794 | 0 | 0.000197 | 0        | 0        | 0        |
| 0 | 0        | 0        | 0.000197 | 0 | 3.29E-05 | 0        | 0        | 0        |
| 0 | 0        | 0        | 0.037871 | 0 | 6.57E-05 | 0        | 0        | 0        |
| 0 | 0        | 0        | 0.001118 | 0 | 0        | 0        | 0        | 0        |
| 0 | 0        | 0        | 0.000131 | 0 | 0        | 3.29E-05 | 0        | 0        |
| 0 | 0        | 0        | 0.000427 | 0 | 0        | 0        | 0        | 0        |
| 0 | 0        | 0        | 9.86E-05 | 0 | 0        | 0        | 0        | 0        |
| 0 | 0        | 0        | 3.29E-05 | 0 | 3.29E-05 | 0        | 6.57E-05 | 0        |
| 0 | 0        | 0        | 0.000592 | 0 | 0.000164 | 0        | 9.86E-05 | 0        |
| 0 | 0        | 0        | 0.00217  | 0 | 6.57E-05 | 0        | 0.000131 | 0        |
| 0 | 0        | 0        | 0.000197 | 0 | 0        | 6.57E-05 | 0        | 0        |
| 0 | 0        | 0        | 0.001216 | 0 | 0        | 0        | 0        | 0        |
| 0 | 0        | 0        | 0.000394 | 0 | 0        | 0        | 0        | 0        |
| 0 | 0        | 0        | 0.000362 | 0 | 0        | 0        | 3.29E-05 | 0        |
| 0 | 0        | 0        | 0.00526  | 0 | 6.57E-05 | 0        | 3.29E-05 | 0        |
| 0 | 0        | 0        | 0        | 0 | 0        | 0        | 0        | 0        |
| 0 | 0        | 6.57E-05 | 0.000329 | 0 | 0        | 0        | 0        | 0        |
| 0 | 0        | 0        | 0        | 0 | 0        | 0        | 0        | 0        |
| 0 | 0        | 0        | 3.29E-05 | 0 | 0        | 0        | 0        | 0        |
| 0 | 0        | 0        | 0        | 0 | 0        | 0        | 0        | 0        |
| 0 | 0        | 0        | 0        | 0 | 0        | 0        | 0        | 0        |
| 0 | 0        | 0        | 0        | 0 | 0        | 0        | 0        | 0        |
| 0 | 0        | 0        | 0        | 0 | 0        | 0        | 0        | 0        |
| 0 | 0        | 0        | 0        | 0 | 0        | 0        | 0        | 0        |
| 0 | 0        | 0        | 0        | 0 | 0        | 0        | 0        | 0        |
| 0 | 0        | 0        | 0        | 0 | 0        | 0        | 0        | 0        |
| 0 | 0        | 0        | 0        | 0 | 0        | 0        | 0        | 0        |
| 0 | 0        | 0        | 0        | 0 | 0        | 0        | 0        | 0        |
| 0 | 3.29E-05 | 9.86E-05 | 0.007101 | 0 | 0.000131 | 0        | 0        | 0        |
| 0 | 0        | 6.57E-05 | 0.00286  | 0 | 0        | 0        | 0        | 0        |
| 0 | 0        | 0        | 0.001216 | 0 | 3.29E-05 | 0        | 0        | 0        |
| 0 | 0        | 0.000131 | 0.012525 | 0 | 0.000296 | 0        | 9.86E-05 | 6.57E-05 |
| 0 | 0        | 0        | 0.007002 | 0 | 0        | 0        | 0        | 9.86E-05 |
| 0 | 0        | 0        | 0.095795 | 0 | 0.000526 | 0        | 0        | 9.86E-05 |
| 0 | 0        | 0        | 0.004734 | 0 | 0        | 0        | 0        | 0        |
| 0 | 0        | 0        | 0        | 0 | 6.57E-05 | 0        | 0        | 0        |
| 0 | 0        | 0        | 0        | 0 | 3.29E-05 | 0        | 0        | 0        |
| 0 | 0        | 0        | 0.000296 | 0 | 0.002498 | 0        | 0        | 0        |
| 0 | 0        | 0        | 0        | 0 | 0        | 0        | 0        | 0        |
| 0 | 0        | 0        | 3.29E-05 | 0 | 6.57E-05 | 0        | 0        | 0        |

|   |          |   |          |   |          |          |          |   |
|---|----------|---|----------|---|----------|----------|----------|---|
| 0 | 0        | 0 | 0.009534 | 0 | 3.29E-05 | 0        | 0        | 0 |
| 0 | 0        | 0 | 3.29E-05 | 0 | 0.000296 | 0        | 0        | 0 |
| 0 | 0        | 0 | 0        | 0 | 0        | 0        | 0        | 0 |
| 0 | 0        | 0 | 0        | 0 | 0        | 0        | 0        | 0 |
| 0 | 0        | 0 | 0        | 0 | 9.86E-05 | 0        | 0        | 0 |
| 0 | 0        | 0 | 0.017555 | 0 | 0        | 0        | 0        | 0 |
| 0 | 0        | 0 | 0.053453 | 0 | 3.29E-05 | 0        | 0        | 0 |
| 0 | 0        | 0 | 0.012295 | 0 | 0        | 0        | 0        | 0 |
| 0 | 0        | 0 | 0.001052 | 0 | 0        | 0        | 0        | 0 |
| 0 | 0        | 0 | 0.002696 | 0 | 0        | 0        | 0        | 0 |
| 0 | 0        | 0 | 0.003781 | 0 | 0        | 0        | 0        | 0 |
| 0 | 0        | 0 | 0.00217  | 0 | 0        | 0        | 0        | 0 |
| 0 | 0        | 0 | 0.000526 | 0 | 0.000164 | 0        | 0        | 0 |
| 0 | 0        | 0 | 0.004076 | 0 | 0        | 6.57E-05 | 0        | 0 |
| 0 | 0        | 0 | 0.003846 | 0 | 0        | 0        | 0        | 0 |
| 0 | 0        | 0 | 0.005621 | 0 | 0        | 0        | 0        | 0 |
| 0 | 0        | 0 | 0.001808 | 0 | 0        | 0        | 0        | 0 |
| 0 | 9.86E-05 | 0 | 0.011276 | 0 | 0.00046  | 0.000394 | 9.86E-05 | 0 |
| 0 | 0.000427 | 0 | 0.000625 | 0 | 0        | 0        | 0        | 0 |
| 0 | 0        | 0 | 0.00194  | 0 | 0        | 0        | 0        | 0 |
| 0 | 0        | 0 | 0.018311 | 0 | 0        | 0        | 0        | 0 |
| 0 | 0        | 0 | 0.011144 | 0 | 0.000953 | 0.000526 | 0        | 0 |
| 0 | 0        | 0 | 0.000164 | 0 | 0        | 0        | 0        | 0 |

| k_Bacteri |
|-----------|-----------|-----------|-----------|-----------|-----------|-----------|-----------|-----------|
| 0         | 0.000263  | 0         | 0         | 0         | 0         | 0         | 0         | 0         |
| 0         | 0.000131  | 0         | 0         | 0         | 0         | 0         | 0         | 0         |
| 0         | 0         | 0         | 0         | 0         | 0         | 0         | 0         | 0         |
| 0         | 0         | 0         | 0         | 0         | 0         | 0         | 0         | 0         |
| 0         | 0         | 0         | 0         | 0         | 0         | 0         | 0         | 0         |
| 0         | 0         | 0         | 0         | 0         | 0         | 0         | 0         | 0         |
| 0         | 0         | 0         | 0         | 0         | 0         | 0         | 0         | 0         |
| 0         | 0         | 0         | 0         | 0         | 0         | 0         | 0         | 0         |
| 0         | 0.000723  | 0         | 0         | 0         | 0         | 0         | 0         | 0         |
| 0         | 0         | 0         | 0         | 0         | 0         | 0         | 0         | 0         |
| 0         | 0         | 0         | 0         | 0         | 0         | 0         | 6.57E-05  | 0         |
| 0         | 3.29E-05  | 0         | 0         | 0         | 0         | 0         | 0         | 0         |
| 0         | 0.000657  | 0         | 0         | 0         | 0         | 0         | 0.001348  | 0         |
| 0         | 0.000197  | 6.57E-05  | 0         | 0         | 0         | 0         | 0.000394  | 0         |
| 0         | 0.000131  | 6.57E-05  | 0         | 0         | 0         | 0         | 0         | 0         |
| 0         | 0         | 0         | 0         | 0         | 0         | 0         | 0         | 0         |
| 0         | 0.002334  | 0         | 0         | 0         | 0         | 0         | 0.007857  | 0         |
| 0         | 0         | 0         | 0         | 0         | 0         | 0         | 0         | 0         |
| 0         | 0         | 0         | 0         | 0         | 0         | 0         | 0         | 0         |
| 0         | 0         | 0         | 0         | 0         | 0         | 0         | 0         | 0         |
| 0         | 0.000164  | 0         | 0         | 0         | 0         | 0         | 0.000263  | 0         |
| 0         | 0         | 0         | 0         | 0         | 0         | 0         | 0         | 0         |
| 0         | 0.000329  | 0         | 0         | 0         | 0         | 0         | 0         | 0         |
| 0         | 0         | 0         | 0         | 0         | 0         | 0         | 0         | 0         |
| 0         | 0         | 0         | 0         | 0         | 0         | 0         | 0         | 0         |
| 0         | 0         | 0         | 0         | 0         | 0         | 0         | 0         | 0         |
| 0         | 0         | 0.00069   | 0         | 0         | 0         | 0         | 0         | 0         |
| 0         | 3.29E-05  | 0.001578  | 0         | 0         | 0         | 0         | 0         | 0         |
| 0         | 3.29E-05  | 6.57E-05  | 0         | 0         | 0         | 0         | 0         | 0         |
| 0         | 0         | 3.29E-05  | 0         | 0         | 0         | 0         | 0         | 0         |
| 0         | 0         | 0         | 0         | 0         | 0         | 0         | 0         | 0         |
| 0         | 0.000394  | 0.00069   | 0         | 0         | 0         | 0         | 0.000625  | 0         |
| 0         | 0         | 0.00309   | 0         | 0         | 0         | 0         | 0         | 0         |
| 0         | 0.000427  | 0.000789  | 0         | 0         | 0         | 0         | 0         | 0         |
| 0         | 0         | 0.015615  | 0         | 0         | 0         | 0         | 0         | 0         |
| 0         | 0         | 0         | 0         | 0         | 0         | 0         | 0         | 0         |
| 0         | 0         | 0.00023   | 0         | 0         | 0         | 0         | 0         | 0         |
| 0         | 0         | 9.86E-05  | 0         | 0         | 0         | 0         | 0         | 0         |
| 0         | 0         | 0         | 0         | 0         | 0         | 0         | 0         | 0         |
| 0         | 0         | 0.00069   | 0         | 3.29E-05  | 0         | 0         | 0         | 0         |
| 0         | 0         | 3.29E-05  | 0         | 0         | 0         | 0         | 0         | 0         |
| 0         | 0         | 0         | 0         | 0         | 0         | 0         | 0         | 0         |
| 0         | 0         | 0.00046   | 0         | 0         | 0         | 0         | 0         | 0         |





|   |          |          |          |   |   |   |          |   |
|---|----------|----------|----------|---|---|---|----------|---|
| 0 | 0        | 0        | 0        | 0 | 0 | 0 | 0        | 0 |
| 0 | 0        | 0        | 0        | 0 | 0 | 0 | 0        | 0 |
| 0 | 0        | 0        | 0        | 0 | 0 | 0 | 0        | 0 |
| 0 | 0        | 0.00069  | 0        | 0 | 0 | 0 | 0        | 0 |
| 0 | 0        | 0        | 0        | 0 | 0 | 0 | 0        | 0 |
| 0 | 0        | 0        | 0.000131 | 0 | 0 | 0 | 0        | 0 |
| 0 | 0        | 0        | 0        | 0 | 0 | 0 | 0        | 0 |
| 0 | 0        | 0        | 0        | 0 | 0 | 0 | 0        | 0 |
| 0 | 0        | 0.000263 | 0        | 0 | 0 | 0 | 0        | 0 |
| 0 | 0        | 0.000723 | 0        | 0 | 0 | 0 | 0        | 0 |
| 0 | 0        | 0.000329 | 0        | 0 | 0 | 0 | 0        | 0 |
| 0 | 0        | 0.000197 | 0        | 0 | 0 | 0 | 0        | 0 |
| 0 | 0.000421 | 0        | 0        | 0 | 0 | 0 | 0        | 0 |
| 0 | 0        | 0        | 0        | 0 | 0 | 0 | 0        | 0 |
| 0 | 0.000263 | 0        | 0        | 0 | 0 | 0 | 0        | 0 |
| 0 | 0        | 0        | 0        | 0 | 0 | 0 | 3.29E-05 | 0 |
| 0 | 0.001282 | 0        | 0        | 0 | 0 | 0 | 0.006739 | 0 |
| 0 | 0        | 6.57E-05 | 0        | 0 | 0 | 0 | 0        | 0 |
| 0 | 0        | 0        | 0        | 0 | 0 | 0 | 0        | 0 |
| 0 | 0.000329 | 0        | 0        | 0 | 0 | 0 | 0        | 0 |
| 0 | 0.000394 | 0        | 0        | 0 | 0 | 0 | 0        | 0 |
| 0 | 0        | 0        | 0        | 0 | 0 | 0 | 0        | 0 |
| 0 | 0        | 3.29E-05 | 0        | 0 | 0 | 0 | 0        | 0 |
| 0 | 0        | 6.57E-05 | 0        | 0 | 0 | 0 | 0        | 0 |
| 0 | 0        | 0        | 0        | 0 | 0 | 0 | 0        | 0 |
| 0 | 0        | 0        | 0        | 0 | 0 | 0 | 0        | 0 |
| 0 | 0        | 0        | 0        | 0 | 0 | 0 | 0        | 0 |
| 0 | 0        | 0        | 0        | 0 | 0 | 0 | 0        | 0 |
| 0 | 0        | 0        | 0        | 0 | 0 | 0 | 0        | 0 |
| 0 | 0        | 0        | 0        | 0 | 0 | 0 | 0        | 0 |
| 0 | 0        | 3.29E-05 | 0        | 0 | 0 | 0 | 3.29E-05 | 0 |
| 0 | 0        | 0        | 0        | 0 | 0 | 0 | 0        | 0 |
| 0 | 0        | 0.000164 | 0        | 0 | 0 | 0 | 0        | 0 |
| 0 | 0        | 0.000197 | 0        | 0 | 0 | 0 | 0        | 0 |
| 0 | 0        | 0.000197 | 0        | 0 | 0 | 0 | 0        | 0 |
| 0 | 0        | 3.29E-05 | 0        | 0 | 0 | 0 | 0        | 0 |
| 0 | 0        | 0        | 0        | 0 | 0 | 0 | 0        | 0 |
| 0 | 0        | 0.000164 | 0        | 0 | 0 | 0 | 0        | 0 |
| 0 | 0        | 0.00023  | 0        | 0 | 0 | 0 | 0        | 0 |
| 0 | 0        | 0.00092  | 0        | 0 | 0 | 0 | 0        | 0 |
| 0 | 0.000131 | 0.000592 | 0        | 0 | 0 | 0 | 0        | 0 |
| 0 | 0        | 3.29E-05 | 0        | 0 | 0 | 0 | 0        | 0 |
| 0 | 0        | 3.29E-05 | 0        | 0 | 0 | 0 | 0        | 0 |
| 0 | 0        | 0        | 0        | 0 | 0 | 0 | 0        | 0 |
| 0 | 0        | 9.86E-05 | 0        | 0 | 0 | 0 | 0        | 0 |
| 0 | 0.000394 | 0.00046  | 0        | 0 | 0 | 0 | 0        | 0 |



|   |          |          |   |   |   |         |          |   |
|---|----------|----------|---|---|---|---------|----------|---|
| 0 | 0        | 6.57E-05 | 0 | 0 | 0 | 0       | 0        | 0 |
| 0 | 0        | 0        | 0 | 0 | 0 | 0       | 0        | 0 |
| 0 | 0.000296 | 0.000756 | 0 | 0 | 0 | 0       | 3.29E-05 | 0 |
| 0 | 0        | 3.29E-05 | 0 | 0 | 0 | 0       | 0        | 0 |
| 0 | 0        | 0        | 0 | 0 | 0 | 0       | 0.000296 | 0 |
| 0 | 0        | 0        | 0 | 0 | 0 | 0       | 0        | 0 |
| 0 | 3.29E-05 | 0        | 0 | 0 | 0 | 0       | 0        | 0 |
| 0 | 0        | 0        | 0 | 0 | 0 | 0       | 0        | 0 |
| 0 | 0        | 0        | 0 | 0 | 0 | 0       | 0        | 0 |
| 0 | 0        | 0        | 0 | 0 | 0 | 0       | 0        | 0 |
| 0 | 0        | 0        | 0 | 0 | 0 | 0       | 0        | 0 |
| 0 | 3.29E-05 | 0        | 0 | 0 | 0 | 0       | 0.000131 | 0 |
| 0 | 0        | 0        | 0 | 0 | 0 | 0       | 0        | 0 |
| 0 | 0        | 0.00023  | 0 | 0 | 0 | 0       | 0.000164 | 0 |
| 0 | 0        | 0.00069  | 0 | 0 | 0 | 0       | 9.86E-05 | 0 |
| 0 | 9.86E-05 | 0        | 0 | 0 | 0 | 0       | 0.000296 | 0 |
| 0 | 0.000197 | 0        | 0 | 0 | 0 | 0       | 0        | 0 |
| 0 | 0        | 0        | 0 | 0 | 0 | 0       | 0        | 0 |
| 0 | 0        | 0        | 0 | 0 | 0 | 0       | 0.004274 | 0 |
| 0 | 0        | 0        | 0 | 0 | 0 | 0       | 0        | 0 |
| 0 | 0        | 0        | 0 | 0 | 0 | 0       | 0        | 0 |
| 0 | 0        | 0        | 0 | 0 | 0 | 0       | 0        | 0 |
| 0 | 0        | 0        | 0 | 0 | 0 | 0       | 0        | 0 |
| 0 | 0        | 0        | 0 | 0 | 0 | 0       | 0        | 0 |
| 0 | 6.57E-05 | 0        | 0 | 0 | 0 | 0       | 6.57E-05 | 0 |
| 0 | 0        | 0        | 0 | 0 | 0 | 0       | 0        | 0 |
| 0 | 0.000263 | 0        | 0 | 0 | 0 | 0       | 0        | 0 |
| 0 | 0        | 6.57E-05 | 0 | 0 | 0 | 0       | 0        | 0 |
| 0 | 9.86E-05 | 0        | 0 | 0 | 0 | 0       | 3.29E-05 | 0 |
| 0 | 0        | 0        | 0 | 0 | 0 | 0       | 0        | 0 |
| 0 | 9.86E-05 | 0        | 0 | 0 | 0 | 0       | 0        | 0 |
| 0 | 0        | 0        | 0 | 0 | 0 | 0       | 0        | 0 |
| 0 | 0        | 0        | 0 | 0 | 0 | 0       | 0        | 0 |
| 0 | 0        | 0        | 0 | 0 | 0 | 0       | 0        | 0 |
| 0 | 0.000131 | 0        | 0 | 0 | 0 | 0       | 0        | 0 |
| 0 | 0        | 0        | 0 | 0 | 0 | 0       | 0        | 0 |
| 0 | 0        | 0        | 0 | 0 | 0 | 0       | 0        | 0 |
| 0 | 0        | 9.86E-05 | 0 | 0 | 0 | 0       | 0        | 0 |
| 0 | 0        | 0        | 0 | 0 | 0 | 0       | 0        | 0 |
| 0 | 0        | 0.000131 | 0 | 0 | 0 | 0       | 0        | 0 |
| 0 | 0        | 0.002433 | 0 | 0 | 0 | 0       | 0        | 0 |
| 0 | 0        | 9.86E-05 | 0 | 0 | 0 | 0       | 0        | 0 |
| 0 | 0        | 6.57E-05 | 0 | 0 | 0 | 0       | 0        | 0 |
| 0 | 0        | 3.29E-05 | 0 | 0 | 0 | 0       | 0        | 0 |
| 0 | 0.000789 | 3.29E-05 | 0 | 0 | 0 | 0       | 0        | 0 |
| 0 | 0        | 6.57E-05 | 0 | 0 | 0 | 0.00046 | 0.000263 | 0 |

|   |          |          |   |   |   |          |          |   |
|---|----------|----------|---|---|---|----------|----------|---|
| 0 | 0        | 0        | 0 | 0 | 0 | 6.57E-05 | 0        | 0 |
| 0 | 0.000822 | 0.000362 | 0 | 0 | 0 | 0        | 0        | 0 |
| 0 | 0        | 0.00046  | 0 | 0 | 0 | 0        | 0        | 0 |
| 0 | 0        | 0        | 0 | 0 | 0 | 0        | 0        | 0 |
| 0 | 0        | 0        | 0 | 0 | 0 | 6.57E-05 | 0        | 0 |
| 0 | 0        | 0        | 0 | 0 | 0 | 0        | 0        | 0 |
| 0 | 0        | 0        | 0 | 0 | 0 | 0        | 0        | 0 |
| 0 | 0        | 0        | 0 | 0 | 0 | 0        | 0        | 0 |
| 0 | 0        | 0        | 0 | 0 | 0 | 0        | 0        | 0 |
| 0 | 0        | 0        | 0 | 0 | 0 | 0        | 0.000986 | 0 |
| 0 | 0        | 0        | 0 | 0 | 0 | 0        | 0        | 0 |
| 0 | 0        | 0        | 0 | 0 | 0 | 0        | 0.003748 | 0 |
| 0 | 0        | 0        | 0 | 0 | 0 | 0        | 0        | 0 |
| 0 | 0        | 0        | 0 | 0 | 0 | 0        | 0        | 0 |
| 0 | 0        | 6.57E-05 | 0 | 0 | 0 | 0        | 0        | 0 |
| 0 | 0        | 0        | 0 | 0 | 0 | 0        | 0        | 0 |
| 0 | 0        | 0        | 0 | 0 | 0 | 0        | 0        | 0 |
| 0 | 0        | 0        | 0 | 0 | 0 | 0        | 0        | 0 |
| 0 | 0        | 0        | 0 | 0 | 0 | 0        | 0        | 0 |
| 0 | 0        | 0        | 0 | 0 | 0 | 0        | 0        | 0 |
| 0 | 0        | 0        | 0 | 0 | 0 | 0        | 0        | 0 |
| 0 | 0        | 0        | 0 | 0 | 0 | 0        | 0        | 0 |
| 0 | 0        | 0        | 0 | 0 | 0 | 0        | 0        | 0 |
| 0 | 0        | 3.29E-05 | 0 | 0 | 0 | 0        | 0        | 0 |
| 0 | 0        | 0        | 0 | 0 | 0 | 0        | 0        | 0 |
| 0 | 0        | 0        | 0 | 0 | 0 | 0        | 0        | 0 |
| 0 | 0        | 0        | 0 | 0 | 0 | 0        | 0        | 0 |
| 0 | 0        | 0        | 0 | 0 | 0 | 0        | 0        | 0 |
| 0 | 0        | 0        | 0 | 0 | 0 | 0        | 0        | 0 |
| 0 | 0        | 0        | 0 | 0 | 0 | 0        | 0        | 0 |
| 0 | 6.57E-05 | 6.57E-05 | 0 | 0 | 0 | 0        | 0        | 0 |
| 0 | 0        | 0        | 0 | 0 | 0 | 0        | 0        | 0 |
| 0 | 0        | 0        | 0 | 0 | 0 | 0        | 0        | 0 |
| 0 | 0        | 0        | 0 | 0 | 0 | 0        | 0        | 0 |
| 0 | 0        | 0        | 0 | 0 | 0 | 0        | 0        | 0 |
| 0 | 0        | 0        | 0 | 0 | 0 | 0        | 0        | 0 |
| 0 | 0        | 0        | 0 | 0 | 0 | 0        | 0        | 0 |
| 0 | 0        | 0.000131 | 0 | 0 | 0 | 6.57E-05 | 0        | 0 |
| 0 | 0.000296 | 0        | 0 | 0 | 0 | 0        | 0        | 0 |
| 0 | 3.29E-05 | 0        | 0 | 0 | 0 | 0        | 0        | 0 |
| 0 | 0.001479 | 0        | 0 | 0 | 0 | 0        | 0.002038 | 0 |
| 0 | 0.000362 | 0        | 0 | 0 | 0 | 0        | 0        | 0 |
| 0 | 0        | 0        | 0 | 0 | 0 | 0        | 0        | 0 |
| 0 | 0.000296 | 0        | 0 | 0 | 0 | 0        | 0        | 0 |
| 0 | 0        | 0        | 0 | 0 | 0 | 0        | 0        | 0 |
| 0 | 0        | 0.000164 | 0 | 0 | 0 | 0        | 3.29E-05 | 0 |
| 0 | 0.000197 | 0.000131 | 0 | 0 | 0 | 0        | 0        | 0 |
| 0 | 6.57E-05 | 0.00046  | 0 | 0 | 0 | 0        | 0        | 0 |
| 0 | 3.29E-05 | 0.000164 | 0 | 0 | 0 | 0        | 0        | 0 |





|   |          |          |          |          |   |          |          |          |
|---|----------|----------|----------|----------|---|----------|----------|----------|
| 0 | 0        | 0        | 0        | 0        | 0 | 0.000197 | 0        | 0        |
| 0 | 0        | 0        | 0        | 0        | 0 | 0        | 0.000263 | 0        |
| 0 | 0.000394 | 3.29E-05 | 0        | 0        | 0 | 9.86E-05 | 0        | 0        |
| 0 | 0.000625 | 0        | 0        | 0        | 0 | 0        | 0        | 0        |
| 0 | 0.000329 | 0        | 0        | 0        | 0 | 0        | 0        | 0        |
| 0 | 0        | 0        | 0        | 0        | 0 | 0        | 0        | 0        |
| 0 | 0        | 0        | 0        | 0        | 0 | 0        | 0        | 0        |
| 0 | 0        | 0        | 0        | 0        | 0 | 0        | 0        | 0        |
| 0 | 0        | 0        | 0        | 0        | 0 | 0        | 0        | 0        |
| 0 | 0        | 0        | 0        | 0        | 0 | 0        | 0        | 0        |
| 0 | 0        | 0        | 0        | 0        | 0 | 0        | 0        | 0        |
| 0 | 0        | 0        | 0        | 0        | 0 | 0        | 0        | 0        |
| 0 | 0        | 0        | 0        | 0        | 0 | 0        | 0        | 0        |
| 0 | 0        | 0        | 0        | 0        | 0 | 0        | 0        | 0        |
| 0 | 0        | 0        | 0        | 0        | 0 | 0        | 0        | 0        |
| 0 | 0        | 0        | 0        | 0        | 0 | 0        | 0        | 0        |
| 0 | 6.57E-05 | 0        | 0        | 0        | 0 | 0        | 3.29E-05 | 0        |
| 0 | 0        | 0        | 0        | 0        | 0 | 0        | 0        | 0        |
| 0 | 0        | 0        | 0        | 0        | 0 | 0        | 0        | 0        |
| 0 | 6.57E-05 | 0        | 0        | 0        | 0 | 0        | 0        | 0        |
| 0 | 3.29E-05 | 0        | 3.29E-05 | 0        | 0 | 0        | 0        | 0        |
| 0 | 0        | 0        | 0        | 0        | 0 | 0        | 6.57E-05 | 0        |
| 0 | 0        | 0        | 0        | 0        | 0 | 0        | 0        | 0        |
| 0 | 0        | 0        | 0        | 0        | 0 | 0        | 0        | 0        |
| 0 | 0        | 0        | 0        | 0        | 0 | 0        | 0.000427 | 0        |
| 0 | 0.000197 | 0        | 0        | 0        | 0 | 0        | 0        | 0        |
| 0 | 0        | 0        | 0        | 0        | 0 | 0        | 0        | 0        |
| 0 | 0.000329 | 0        | 0        | 0        | 0 | 0        | 0        | 0        |
| 0 | 0.000756 | 0        | 0        | 0        | 0 | 0        | 0        | 0        |
| 0 | 0.000592 | 0        | 0        | 0        | 0 | 0        | 0        | 0        |
| 0 | 3.29E-05 | 9.86E-05 | 0        | 3.29E-05 | 0 | 0        | 0        | 0        |
| 0 | 9.86E-05 | 0.000131 | 0        | 0        | 0 | 0        | 0        | 0        |
| 0 | 0        | 3.29E-05 | 0        | 0        | 0 | 0        | 0        | 0        |
| 0 | 0        | 0.000526 | 0        | 3.29E-05 | 0 | 0        | 0        | 0        |
| 0 | 0.000164 | 9.86E-05 | 0        | 0        | 0 | 0        | 0        | 0        |
| 0 | 0        | 6.57E-05 | 0        | 0        | 0 | 0        | 0        | 0        |
| 0 | 3.29E-05 | 0        | 0        | 0        | 0 | 0        | 0        | 0        |
| 0 | 0        | 0        | 0        | 0        | 0 | 0        | 0        | 0        |
| 0 | 0        | 0        | 0        | 0        | 0 | 0        | 0        | 0        |
| 0 | 0        | 0.00023  | 0        | 0        | 0 | 0        | 0        | 0        |
| 0 | 0        | 0.000197 | 0        | 0        | 0 | 0        | 0        | 0        |
| 0 | 0        | 3.29E-05 | 0        | 0        | 0 | 0        | 0        | 0        |
| 0 | 0.000329 | 0.003485 | 0        | 0        | 0 | 0        | 0        | 0        |
| 0 | 0.002268 | 0        | 0        | 0        | 0 | 0        | 0.013314 | 0        |
| 0 | 0        | 0.001019 | 0        | 0        | 0 | 0        | 0        | 0        |
| 0 | 0        | 9.86E-05 | 0        | 0        | 0 | 0        | 0        | 0.000131 |
| 0 | 0.000888 | 0        | 0        | 0        | 0 | 0        | 0        | 0        |
| 0 | 0        | 0        | 0.001085 | 0        | 0 | 0        | 0        | 0        |
| 0 | 0.000296 | 0        | 0        | 0        | 0 | 0        | 0        | 0        |
| 0 | 0.009961 | 0        | 0        | 0        | 0 | 0        | 0.000427 | 0        |

|   |          |          |          |          |          |          |          |   |
|---|----------|----------|----------|----------|----------|----------|----------|---|
| 0 | 0        | 0        | 0        | 0        | 0        | 0        | 0        | 0 |
| 0 | 0        | 0        | 0        | 0        | 0        | 0        | 0        | 0 |
| 0 | 3.29E-05 | 0        | 0        | 0        | 0        | 0        | 3.29E-05 | 0 |
| 0 | 0        | 0        | 0        | 0        | 0        | 0        | 0        | 0 |
| 0 | 0.000131 | 0        | 0        | 0        | 0        | 0        | 0.000362 | 0 |
| 0 | 0        | 6.57E-05 | 0        | 0        | 0        | 0        | 0        | 0 |
| 0 | 9.86E-05 | 0        | 0        | 0        | 0        | 0        | 0        | 0 |
| 0 | 0        | 0        | 0        | 0        | 0        | 0        | 0        | 0 |
| 0 | 0        | 0.000394 | 0        | 0        | 0        | 0        | 0        | 0 |
| 0 | 0        | 0.000296 | 0        | 0        | 0        | 0        | 0        | 0 |
| 0 | 0        | 0.000197 | 0        | 0        | 0        | 0        | 0        | 0 |
| 0 | 0        | 0.000592 | 0        | 0        | 0        | 0        | 0        | 0 |
| 0 | 0        | 0.001972 | 0        | 0        | 0        | 0        | 0        | 0 |
| 0 | 6.57E-05 | 0        | 0        | 0        | 0        | 0        | 6.57E-05 | 0 |
| 0 | 0        | 0        | 0        | 0        | 0        | 0        | 0        | 0 |
| 0 | 6.57E-05 | 0        | 0        | 0        | 0        | 0        | 0        | 0 |
| 0 | 9.86E-05 | 0.000131 | 0        | 0        | 0        | 0        | 0        | 0 |
| 0 | 0.000362 | 0        | 0        | 0        | 0        | 0        | 0        | 0 |
| 0 | 0        | 0        | 0        | 0        | 0        | 0        | 0        | 0 |
| 0 | 0        | 0        | 0        | 0        | 0        | 0        | 0        | 0 |
| 0 | 0        | 0        | 0        | 0        | 0        | 0        | 0        | 0 |
| 0 | 0.000296 | 3.29E-05 | 0        | 0        | 0        | 0        | 0        | 0 |
| 0 | 0        | 3.29E-05 | 0        | 0        | 0        | 0        | 0.000131 | 0 |
| 0 | 0        | 0.000362 | 0        | 0        | 0        | 0        | 0        | 0 |
| 0 | 0        | 6.57E-05 | 0        | 0        | 0        | 0        | 0        | 0 |
| 0 | 0        | 6.57E-05 | 0        | 0        | 0        | 0        | 0        | 0 |
| 0 | 0        | 0        | 0        | 0        | 0        | 0        | 0        | 0 |
| 0 | 0        | 0        | 0        | 0        | 0        | 0        | 0        | 0 |
| 0 | 0        | 0        | 0        | 0        | 3.29E-05 | 0        | 0        | 0 |
| 0 | 0.00092  | 0.000329 | 0        | 0        | 0        | 3.29E-05 | 0        | 0 |
| 0 | 0        | 0.000855 | 0        | 0.000723 | 0        | 0        | 0        | 0 |
| 0 | 0        | 0        | 0        | 0        | 0        | 0        | 0        | 0 |
| 0 | 0        | 0        | 0        | 0        | 0        | 0        | 0        | 0 |
| 0 | 0.000526 | 0        | 0        | 0        | 0        | 0        | 6.57E-05 | 0 |
| 0 | 0        | 3.29E-05 | 0        | 0        | 0        | 0        | 0        | 0 |
| 0 | 0        | 0        | 3.29E-05 | 0        | 0        | 0        | 0        | 0 |
| 0 | 0.001414 | 0        | 0.000789 | 0        | 0        | 0        | 0        | 0 |
| 0 | 0        | 0        | 0        | 0        | 0        | 0        | 0        | 0 |
| 0 | 0        | 0        | 0        | 0        | 0        | 0        | 3.29E-05 | 0 |
| 0 | 0        | 0        | 0        | 0        | 0        | 0        | 0        | 0 |
| 0 | 0.00023  | 0        | 0        | 0        | 0        | 0        | 0        | 0 |
| 0 | 0        | 0        | 0        | 0        | 0        | 0        | 0        | 0 |
| 0 | 6.57E-05 | 0        | 0        | 0        | 0        | 0        | 0        | 0 |
| 0 | 3.29E-05 | 0        | 0        | 0        | 0        | 0        | 0        | 0 |
| 0 | 3.29E-05 | 0        | 0        | 0        | 0        | 0        | 0        | 0 |
| 0 | 0        | 0.000953 | 0        | 0        | 0        | 0        | 0        | 0 |
| 0 | 0        | 0.009599 | 0        | 0        | 0        | 0        | 0        | 0 |



|          |          |          |   |          |   |          |          |   |   |
|----------|----------|----------|---|----------|---|----------|----------|---|---|
| 0        | 0        | 0        | 0 | 0        | 0 | 0        | 0        | 0 | 0 |
| 0        | 0        | 0        | 0 | 0        | 0 | 0        | 0        | 0 | 0 |
| 0        | 3.29E-05 | 3.29E-05 | 0 | 0        | 0 | 0        | 0        | 0 | 0 |
| 0        | 0        | 6.57E-05 | 0 | 0        | 0 | 0        | 0        | 0 | 0 |
| 0        | 0        | 0        | 0 | 0        | 0 | 0        | 0        | 0 | 0 |
| 0        | 0        | 0        | 0 | 0        | 0 | 0        | 0        | 0 | 0 |
| 0        | 0        | 0        | 0 | 0        | 0 | 0        | 0        | 0 | 0 |
| 0        | 0.004372 | 0        | 0 | 0        | 0 | 3.29E-05 | 0.002137 | 0 | 0 |
| 0        | 0        | 0        | 0 | 0        | 0 | 0        | 0        | 0 | 0 |
| 0        | 0        | 0.001085 | 0 | 0        | 0 | 0        | 0        | 0 | 0 |
| 0        | 0        | 0        | 0 | 0        | 0 | 0        | 0.000362 | 0 | 0 |
| 0        | 0        | 0        | 0 | 0        | 0 | 0        | 0        | 0 | 0 |
| 0        | 0        | 3.29E-05 | 0 | 0        | 0 | 0.001578 | 3.29E-05 | 0 | 0 |
| 0        | 0        | 3.29E-05 | 0 | 0        | 0 | 0        | 0        | 0 | 0 |
| 0        | 3.29E-05 | 0        | 0 | 0        | 0 | 0        | 0        | 0 | 0 |
| 0        | 0        | 0        | 0 | 0        | 0 | 0        | 0        | 0 | 0 |
| 0        | 0.000427 | 0        | 0 | 0        | 0 | 0        | 0.000164 | 0 | 0 |
| 0        | 0.000559 | 0        | 0 | 0        | 0 | 0        | 0        | 0 | 0 |
| 0        | 0.000131 | 0        | 0 | 0        | 0 | 0        | 0        | 0 | 0 |
| 0        | 0        | 0        | 0 | 0        | 0 | 0        | 0        | 0 | 0 |
| 0        | 0        | 6.57E-05 | 0 | 0        | 0 | 0        | 0        | 0 | 0 |
| 0        | 0        | 0        | 0 | 0        | 0 | 0        | 0        | 0 | 0 |
| 0        | 0.000197 | 0        | 0 | 0        | 0 | 0        | 0        | 0 | 0 |
| 0        | 0        | 0        | 0 | 0        | 0 | 0        | 0        | 0 | 0 |
| 0        | 0        | 0        | 0 | 0        | 0 | 0        | 0        | 0 | 0 |
| 0        | 0        | 0        | 0 | 0        | 0 | 0        | 0        | 0 | 0 |
| 0        | 0        | 0        | 0 | 0        | 0 | 0        | 0        | 0 | 0 |
| 0        | 0        | 0        | 0 | 0        | 0 | 6.57E-05 | 0        | 0 | 0 |
| 0        | 6.57E-05 | 0        | 0 | 0.000131 | 0 | 0        | 0        | 0 | 0 |
| 0        | 0        | 0        | 0 | 0        | 0 | 0        | 0        | 0 | 0 |
| 0        | 0        | 0        | 0 | 0        | 0 | 0        | 0        | 0 | 0 |
| 0        | 0        | 6.57E-05 | 0 | 0        | 0 | 0        | 0        | 0 | 0 |
| 0        | 3.29E-05 | 3.29E-05 | 0 | 0        | 0 | 0        | 3.29E-05 | 0 | 0 |
| 0        | 0        | 0        | 0 | 0        | 0 | 0        | 0        | 0 | 0 |
| 0        | 9.86E-05 | 0.000394 | 0 | 0        | 0 | 0        | 0        | 0 | 0 |
| 0        | 0        | 0        | 0 | 0        | 0 | 0        | 0        | 0 | 0 |
| 0        | 0        | 0.002433 | 0 | 0        | 0 | 0        | 0        | 0 | 0 |
| 0        | 0.000822 | 0        | 0 | 0        | 0 | 0        | 0        | 0 | 0 |
| 0        | 0        | 0.001118 | 0 | 0        | 0 | 0        | 0        | 0 | 0 |
| 0        | 0        | 0.00069  | 0 | 0        | 0 | 0        | 0        | 0 | 0 |
| 0        | 0        | 0.023439 | 0 | 0        | 0 | 0        | 0        | 0 | 0 |
| 0.000263 | 0.000329 | 0.001907 | 0 | 0.000131 | 0 | 0        | 0        | 0 | 0 |
| 0        | 0.001118 | 0.000789 | 0 | 0        | 0 | 0        | 0        | 0 | 0 |
| 0.000197 | 0        | 0.001348 | 0 | 3.29E-05 | 0 | 0        | 0        | 0 | 0 |
| 6.57E-05 | 0        | 0.00355  | 0 | 9.86E-05 | 0 | 0        | 0        | 0 | 0 |
| 0        | 0        | 0        | 0 | 0        | 0 | 0        | 0.000296 | 0 | 0 |
| 0        | 0        | 3.29E-05 | 0 | 0        | 0 | 0        | 0        | 0 | 0 |

|   |          |          |          |          |   |   |          |   |
|---|----------|----------|----------|----------|---|---|----------|---|
| 0 | 0        | 0        | 0        | 0        | 0 | 0 | 3.29E-05 | 0 |
| 0 | 0.000197 | 0        | 0        | 0        | 0 | 0 | 0        | 0 |
| 0 | 0        | 0        | 0        | 0        | 0 | 0 | 0        | 0 |
| 0 | 0        | 0        | 0        | 0        | 0 | 0 | 0        | 0 |
| 0 | 0.000329 | 0.00023  | 0        | 0        | 0 | 0 | 0        | 0 |
| 0 | 0.000197 | 0.000131 | 0        | 0        | 0 | 0 | 0        | 0 |
| 0 | 0        | 0.000263 | 0        | 0        | 0 | 0 | 0        | 0 |
| 0 | 0        | 0.000427 | 0        | 0        | 0 | 0 | 0        | 0 |
| 0 | 0        | 3.29E-05 | 0        | 0        | 0 | 0 | 0        | 0 |
| 0 | 0.000131 | 0.00023  | 0        | 0        | 0 | 0 | 0        | 0 |
| 0 | 0        | 0        | 0        | 0        | 0 | 0 | 0        | 0 |
| 0 | 0        | 0        | 0        | 0        | 0 | 0 | 0        | 0 |
| 0 | 0        | 0.000164 | 0        | 0        | 0 | 0 | 0        | 0 |
| 0 | 0        | 0        | 0        | 0        | 0 | 0 | 0.00023  | 0 |
| 0 | 0        | 0        | 0        | 0        | 0 | 0 | 0        | 0 |
| 0 | 0        | 0        | 0        | 0        | 0 | 0 | 0        | 0 |
| 0 | 0        | 0        | 0        | 0        | 0 | 0 | 0        | 0 |
| 0 | 0        | 0        | 0        | 0        | 0 | 0 | 0        | 0 |
| 0 | 0        | 0        | 0        | 0        | 0 | 0 | 0        | 0 |
| 0 | 0        | 0        | 0        | 0        | 0 | 0 | 0        | 0 |
| 0 | 0        | 6.57E-05 | 0        | 0        | 0 | 0 | 0        | 0 |
| 0 | 0        | 0        | 0        | 0        | 0 | 0 | 0        | 0 |
| 0 | 0        | 3.29E-05 | 0        | 0        | 0 | 0 | 3.29E-05 | 0 |
| 0 | 0        | 0        | 0        | 0        | 0 | 0 | 0        | 0 |
| 0 | 0        | 6.57E-05 | 0        | 0        | 0 | 0 | 0        | 0 |
| 0 | 0        | 3.29E-05 | 0        | 0        | 0 | 0 | 0        | 0 |
| 0 | 6.57E-05 | 0        | 0        | 0        | 0 | 0 | 9.86E-05 | 0 |
| 0 | 3.29E-05 | 0        | 0        | 0        | 0 | 0 | 0        | 0 |
| 0 | 0        | 0        | 6.57E-05 | 0        | 0 | 0 | 3.29E-05 | 0 |
| 0 | 0        | 0        | 0        | 0        | 0 | 0 | 0        | 0 |
| 0 | 0        | 0        | 0        | 0        | 0 | 0 | 0        | 0 |
| 0 | 3.29E-05 | 0        | 0        | 0        | 0 | 0 | 3.29E-05 | 0 |
| 0 | 0        | 0        | 0        | 0        | 0 | 0 | 0        | 0 |
| 0 | 6.57E-05 | 0        | 0        | 0        | 0 | 0 | 0        | 0 |
| 0 | 0        | 0        | 0        | 0        | 0 | 0 | 0        | 0 |
| 0 | 0        | 0        | 0        | 0        | 0 | 0 | 0        | 0 |
| 0 | 0        | 0.000131 | 0        | 6.57E-05 | 0 | 0 | 3.29E-05 | 0 |
| 0 | 0        | 0.000164 | 0        | 0        | 0 | 0 | 0        | 0 |
| 0 | 0        | 0        | 0        | 0        | 0 | 0 | 0        | 0 |
| 0 | 0        | 0.000625 | 0        | 0        | 0 | 0 | 0        | 0 |
| 0 | 6.57E-05 | 0.000986 | 0        | 0        | 0 | 0 | 0        | 0 |
| 0 | 0        | 0.001709 | 0        | 0        | 0 | 0 | 0        | 0 |
| 0 | 0        | 0.000197 | 0        | 0        | 0 | 0 | 0        | 0 |
| 0 | 0        | 0        | 0        | 0        | 0 | 0 | 0        | 0 |
| 0 | 0        | 0        | 0        | 0        | 0 | 0 | 0        | 0 |
| 0 | 0        | 0        | 0        | 0        | 0 | 0 | 3.29E-05 | 0 |
| 0 | 0        | 0        | 0        | 0        | 0 | 0 | 0        | 0 |
| 0 | 3.29E-05 | 0        | 0        | 0        | 0 | 0 | 0        | 0 |













































|          |   |   |
|----------|---|---|
| 0        | 0 | 0 |
| 0        | 0 | 0 |
| 6.57E-05 | 0 | 0 |
| 0        | 0 | 0 |
| 0        | 0 | 0 |
| 0        | 0 | 0 |
| 0        | 0 | 0 |
| 0        | 0 | 0 |
| 0        | 0 | 0 |
| 0        | 0 | 0 |
| 0        | 0 | 0 |
| 0        | 0 | 0 |
| 0        | 0 | 0 |
| 0        | 0 | 0 |
| 0        | 0 | 0 |
| 0        | 0 | 0 |
| 0        | 0 | 0 |
| 0        | 0 | 0 |
| 0        | 0 | 0 |
| 0        | 0 | 0 |
| 0        | 0 | 0 |
| 0        | 0 | 0 |
| 0        | 0 | 0 |
| 0        | 0 | 0 |
| 0        | 0 | 0 |
| 0        | 0 | 0 |
| 0        | 0 | 0 |
| 0        | 0 | 0 |
| 0        | 0 | 0 |
| 0        | 0 | 0 |
| 0        | 0 | 0 |
| 0        | 0 | 0 |
| 0        | 0 | 0 |
| 0        | 0 | 0 |
| 6.57E-05 | 0 | 0 |
| 0        | 0 | 0 |
| 0        | 0 | 0 |
| 0        | 0 | 0 |
| 0        | 0 | 0 |
| 0        | 0 | 0 |
| 6.57E-05 | 0 | 0 |
| 0        | 0 | 0 |
| 0        | 0 | 0 |
| 0        | 0 | 0 |
| 0        | 0 | 0 |















**ermus**
